# Supplementary material for: Inter-tissue convergence of gene expression during ageing suggests age-related loss of tissue and cellular identity
Source: eLife journal article supplement (doi:10.7554/elife.68048), 2022-01-31
Supplement: supp [file elife-68048-supp-v1.zip]

Archive with 54 entries (54 files):
- elife_poa_e68048_Transparent_Reporting_File.docx
- elife_poa_e68048_Figure_1_source_data_1.xlsx
- elife_poa_e68048_Figure_2_source_data_1.xlsx
- elife_poa_e68048_Figure_3_source_data_1.xlsx
- elife_poa_e68048_Figure_4_source_data_1.xlsx
- elife_poa_e68048_Figure_5_source_data_1.xlsx
- elife_poa_e68048_Supplementary_file_1.xlsx
- elife_poa_e68048_Supplementary_file_2.xlsx
- elife_poa_e68048_Supplementary_file_3.xlsx
- elife_poa_e68048_Supplementary_file_4.xlsx
- elife_poa_e68048_Supplementary_file_5.xlsx
- elife_poa_e68048_Figure_1_figure_supplement_1.pdf
- elife_poa_e68048_Figure_1_figure_supplement_2.pdf
- elife_poa_e68048_Figure_1_figure_supplement_3.pdf
- elife_poa_e68048_Figure_1_figure_supplement_4.pdf
- elife_poa_e68048_Figure_1_figure_supplement_5.pdf
- elife_poa_e68048_Figure_1_figure_supplement_6.pdf
- elife_poa_e68048_Figure_1_figure_supplement_7.pdf
- elife_poa_e68048_Figure_1_figure_supplement_8.pdf
- elife_poa_e68048_Figure_1_figure_supplement_9.pdf
- elife_poa_e68048_Figure_1_figure_supplement_10.pdf
- elife_poa_e68048_Figure_1_figure_supplement_11.pdf
- elife_poa_e68048_Figure_1_figure_supplement_12.pdf
- elife_poa_e68048_Figure_1_figure_supplement_13.pdf
- elife_poa_e68048_Figure_1_figure_supplement_14.pdf
- elife_poa_e68048_Figure_1_figure_supplement_15.pdf
- elife_poa_e68048_Figure_2_figure_supplement_1.pdf
- elife_poa_e68048_Figure_2_figure_supplement_2.pdf
- elife_poa_e68048_Figure_2_figure_supplement_3.pdf
- elife_poa_e68048_Figure_2_figure_supplement_4.pdf
- elife_poa_e68048_Figure_2_figure_supplement_5.pdf
- elife_poa_e68048_Figure_2_figure_supplement_6.pdf
- elife_poa_e68048_Figure_2_figure_supplement_7.pdf
- elife_poa_e68048_Figure_2_figure_supplement_8.pdf
- elife_poa_e68048_Figure_2_figure_supplement_9.pdf
- elife_poa_e68048_Figure_2_figure_supplement_10.pdf
- elife_poa_e68048_Figure_2_figure_supplement_11.pdf
- elife_poa_e68048_Figure_2_figure_supplement_12.pdf
- elife_poa_e68048_Figure_2_figure_supplement_13.pdf
- elife_poa_e68048_Figure_2_figure_supplement_14.pdf
- elife_poa_e68048_Figure_2_figure_supplement_15.pdf
- elife_poa_e68048_Figure_2_figure_supplement_16.pdf
- elife_poa_e68048_Figure_2_figure_supplement_17.pdf
- elife_poa_e68048_Figure_2_figure_supplement_18.pdf
- elife_poa_e68048_Figure_2_figure_supplement_19.pdf
- elife_poa_e68048_Figure_2_figure_supplement_20.pdf
- elife_poa_e68048_Figure_4_figure_supplement_1.pdf
- elife_poa_e68048_Figure_4_figure_supplement_2.pdf
- elife_poa_e68048_Figure_5_figure_supplement_1.pdf
- elife_poa_e68048_Figure_5_figure_supplement_2.pdf
- elife_poa_e68048_Figure_5_figure_supplement_3.pdf
- elife_poa_e68048_Figure_5_figure_supplement_4.pdf
- elife_poa_e68048_Figure_5_figure_supplement_5.pdf
- elife_poa_e68048_Figure_5_figure_supplement_6.pdf
