# Supplementary material for: Inter-tissue convergence of gene expression during ageing suggests age-related loss of tissue and cellular identity
Source: eLife journal article supplement (doi:10.7554/elife.68048), 2022-01-31
Supplement: supp [file elife-68048-supp-v1.zip › elife_poa_e68048_Figure_1_source_data_1.xlsx]

## Sheet: sdata0
sheet		relevant figures						no figure data
sdata1	pca	f1a	f1b	f1-fs1	f1-fs2	f1-fs3
sdata2	PC1-4 vs tissue anova	f1a
sdata3	pc age cors	f1a	f1b
sdata4	mean euclidean distance	f1a	f1b
sdata5	mean euclidean distance dev	f1-fs3
sdata6	mean euclidean distance aging	f1-fs3
sdata7	expression change correlations among tissues	f1c
sdata8	expression change correlations perm test	f1c
sdata9	number of genes: expression change with age	f1d
sdata10	number of significant genes: expression change with age	f1e
sdata11	Number of reversal genes in each tissue	f1f
sdata12	perm. test for shared expression change trends among tissues	f1-fs4
sdata13	shared significant age-related genes among tissues	f1-fs5a
sdata14	magnitude comparison dev vs age	f1-fs5b
sdata15	perm test for shared significant expression change trends among tissues	f1-fs6
sdata16	expression change correlations (abs(rho)>0.6 cutoff)	f1-fs7
sdata17	perm test for reversal trends in each tissue	f1-fs8
sdata18	perm test for shared reversal trends among tissues	f1-fs9
sdata19	reproducing f1 with vst norm: pca	f1-fs10ab
sdata20	reproducing f1 with vst norm: pc_age cors	f1-fs10b
sdata21	reproducing f1 with vst norm: expression change correlations among tissues	f1-fs10c
sdata22	reproducing f1 with vst norm: number of genes with expression change	f1-fs10d
sdata23	reproducing f1 with vst norm: number of genes with significant expression change	f1-fs10e
sdata24	reproducing f1 with vst norm: number of reversal genes in each tissue	f1-fs10f

## Sheet: sdata1
PC	period	type	varExp	sample_id	value	ind_id	age	tissue	log2age
PC1	aging	notissue	0.13167	s8	16.7573	700	93	Cortex	6.53916
PC1	aging	notissue	0.13167	s9	62.0349	705	93	Cortex	6.53916
PC1	aging	notissue	0.13167	s10	-5.84122	2053	144	Cortex	7.16993
PC1	aging	notissue	0.13167	s11	40.453	1753	232	Cortex	7.85798
PC1	aging	notissue	0.13167	s12	-13.2005	1625	303	Cortex	8.24317
PC1	aging	notissue	0.13167	s13	-27.2968	586	649	Cortex	9.34207
PC1	aging	notissue	0.13167	s14	-26.3659	561	654	Cortex	9.35315
PC1	aging	notissue	0.13167	s15	-46.5409	457	904	Cortex	9.82018
PC1	aging	notissue	0.13167	s23	15.1104	700	93	Lung	6.53916
PC1	aging	notissue	0.13167	s24	92.8124	705	93	Lung	6.53916
PC1	aging	notissue	0.13167	s25	44.6323	2053	144	Lung	7.16993
PC1	aging	notissue	0.13167	s26	36.01	1753	232	Lung	7.85798
PC1	aging	notissue	0.13167	s27	-7.97683	1625	303	Lung	8.24317
PC1	aging	notissue	0.13167	s28	-1.97427	586	649	Lung	9.34207
PC1	aging	notissue	0.13167	s29	-54.4109	561	654	Lung	9.35315
PC1	aging	notissue	0.13167	s30	-59.4206	457	904	Lung	9.82018
PC1	aging	notissue	0.13167	s31	-64.7825	465	904	Lung	9.82018
PC1	aging	notissue	0.13167	s39	9.96874	700	93	Liver	6.53916
PC1	aging	notissue	0.13167	s40	66.0222	705	93	Liver	6.53916
PC1	aging	notissue	0.13167	s41	23.7166	2053	144	Liver	7.16993
PC1	aging	notissue	0.13167	s42	50.8214	1753	232	Liver	7.85798
PC1	aging	notissue	0.13167	s43	53.1494	1625	303	Liver	8.24317
PC1	aging	notissue	0.13167	s44	-4.55267	586	649	Liver	9.34207
PC1	aging	notissue	0.13167	s45	-70.4216	561	654	Liver	9.35315
PC1	aging	notissue	0.13167	s46	-67.8451	457	904	Liver	9.82018
PC1	aging	notissue	0.13167	s47	-60.8589	465	904	Liver	9.82018
PC1	aging	notissue	0.13167	s55	-4.05948	700	93	Muscle	6.53916
PC1	aging	notissue	0.13167	s56	54.7377	705	93	Muscle	6.53916
PC1	aging	notissue	0.13167	s57	-8.12966	2053	144	Muscle	7.16993
PC1	aging	notissue	0.13167	s58	11.9879	1753	232	Muscle	7.85798
PC1	aging	notissue	0.13167	s59	2.63624	1625	303	Muscle	8.24317
PC1	aging	notissue	0.13167	s60	28.1567	586	649	Muscle	9.34207
PC1	aging	notissue	0.13167	s61	25.5237	561	654	Muscle	9.35315
PC1	aging	notissue	0.13167	s62	-69.9166	457	904	Muscle	9.82018
PC1	aging	notissue	0.13167	s63	-40.9366	465	904	Muscle	9.82018
PC2	aging	notissue	0.11271	s8	-31.1889	700	93	Cortex	6.53916
PC2	aging	notissue	0.11271	s9	-47.6435	705	93	Cortex	6.53916
PC2	aging	notissue	0.11271	s10	21.5919	2053	144	Cortex	7.16993
PC2	aging	notissue	0.11271	s11	-15.9546	1753	232	Cortex	7.85798
PC2	aging	notissue	0.11271	s12	11.3599	1625	303	Cortex	8.24317
PC2	aging	notissue	0.11271	s13	23.5759	586	649	Cortex	9.34207
PC2	aging	notissue	0.11271	s14	17.7221	561	654	Cortex	9.35315
PC2	aging	notissue	0.11271	s15	20.5372	457	904	Cortex	9.82018
PC2	aging	notissue	0.11271	s23	21.0085	700	93	Lung	6.53916
PC2	aging	notissue	0.11271	s24	-9.29117	705	93	Lung	6.53916
PC2	aging	notissue	0.11271	s25	5.33129	2053	144	Lung	7.16993
PC2	aging	notissue	0.11271	s26	16.4208	1753	232	Lung	7.85798
PC2	aging	notissue	0.11271	s27	68.7502	1625	303	Lung	8.24317
PC2	aging	notissue	0.11271	s28	42.8184	586	649	Lung	9.34207
PC2	aging	notissue	0.11271	s29	-49.5611	561	654	Lung	9.35315
PC2	aging	notissue	0.11271	s30	-128.955	457	904	Lung	9.82018
PC2	aging	notissue	0.11271	s31	33.4783	465	904	Lung	9.82018
PC2	aging	notissue	0.11271	s39	16.7502	700	93	Liver	6.53916
PC2	aging	notissue	0.11271	s40	-26.9704	705	93	Liver	6.53916
PC2	aging	notissue	0.11271	s41	-7.24142	2053	144	Liver	7.16993
PC2	aging	notissue	0.11271	s42	-22.717	1753	232	Liver	7.85798
PC2	aging	notissue	0.11271	s43	-14.6752	1625	303	Liver	8.24317
PC2	aging	notissue	0.11271	s44	16.5899	586	649	Liver	9.34207
PC2	aging	notissue	0.11271	s45	45.144	561	654	Liver	9.35315
PC2	aging	notissue	0.11271	s46	-19.075	457	904	Liver	9.82018
PC2	aging	notissue	0.11271	s47	12.195	465	904	Liver	9.82018
PC2	aging	notissue	0.11271	s55	-33.789	700	93	Muscle	6.53916
PC2	aging	notissue	0.11271	s56	-9.36252	705	93	Muscle	6.53916
PC2	aging	notissue	0.11271	s57	-29.6017	2053	144	Muscle	7.16993
PC2	aging	notissue	0.11271	s58	-31.6115	1753	232	Muscle	7.85798
PC2	aging	notissue	0.11271	s59	45.909	1625	303	Muscle	8.24317
PC2	aging	notissue	0.11271	s60	41.486	586	649	Muscle	9.34207
PC2	aging	notissue	0.11271	s61	37.1196	561	654	Muscle	9.35315
PC2	aging	notissue	0.11271	s62	-86.2387	457	904	Muscle	9.82018
PC2	aging	notissue	0.11271	s63	66.0888	465	904	Muscle	9.82018
PC3	aging	notissue	0.07374	s8	30.9757	700	93	Cortex	6.53916
PC3	aging	notissue	0.07374	s9	-36.4849	705	93	Cortex	6.53916
PC3	aging	notissue	0.07374	s10	1.18981	2053	144	Cortex	7.16993
PC3	aging	notissue	0.07374	s11	0.327285	1753	232	Cortex	7.85798
PC3	aging	notissue	0.07374	s12	-2.92298	1625	303	Cortex	8.24317
PC3	aging	notissue	0.07374	s13	-6.73751	586	649	Cortex	9.34207
PC3	aging	notissue	0.07374	s14	5.70729	561	654	Cortex	9.35315
PC3	aging	notissue	0.07374	s15	7.94532	457	904	Cortex	9.82018
PC3	aging	notissue	0.07374	s23	-34.961	700	93	Lung	6.53916
PC3	aging	notissue	0.07374	s24	-32.2111	705	93	Lung	6.53916
PC3	aging	notissue	0.07374	s25	-24.5158	2053	144	Lung	7.16993
PC3	aging	notissue	0.07374	s26	-29.2523	1753	232	Lung	7.85798
PC3	aging	notissue	0.07374	s27	-2.76299	1625	303	Lung	8.24317
PC3	aging	notissue	0.07374	s28	-11.3649	586	649	Lung	9.34207
PC3	aging	notissue	0.07374	s29	46.1518	561	654	Lung	9.35315
PC3	aging	notissue	0.07374	s30	84.394	457	904	Lung	9.82018
PC3	aging	notissue	0.07374	s31	4.52221	465	904	Lung	9.82018
PC3	aging	notissue	0.07374	s39	-15.8962	700	93	Liver	6.53916
PC3	aging	notissue	0.07374	s40	21.5153	705	93	Liver	6.53916
PC3	aging	notissue	0.07374	s41	-10.9444	2053	144	Liver	7.16993
PC3	aging	notissue	0.07374	s42	12.0817	1753	232	Liver	7.85798
PC3	aging	notissue	0.07374	s43	35.907	1625	303	Liver	8.24317
PC3	aging	notissue	0.07374	s44	26.4454	586	649	Liver	9.34207
PC3	aging	notissue	0.07374	s45	-12.016	561	654	Liver	9.35315
PC3	aging	notissue	0.07374	s46	-33.3133	457	904	Liver	9.82018
PC3	aging	notissue	0.07374	s47	-23.7794	465	904	Liver	9.82018
PC3	aging	notissue	0.07374	s55	-24.2163	700	93	Muscle	6.53916
PC3	aging	notissue	0.07374	s56	25.0121	705	93	Muscle	6.53916
PC3	aging	notissue	0.07374	s57	-71.3133	2053	144	Muscle	7.16993
PC3	aging	notissue	0.07374	s58	-35.3479	1753	232	Muscle	7.85798
PC3	aging	notissue	0.07374	s59	40.2847	1625	303	Muscle	8.24317
PC3	aging	notissue	0.07374	s60	51.6017	586	649	Muscle	9.34207
PC3	aging	notissue	0.07374	s61	51.0612	561	654	Muscle	9.35315
PC3	aging	notissue	0.07374	s62	-52.2333	457	904	Muscle	9.82018
PC3	aging	notissue	0.07374	s63	15.1511	465	904	Muscle	9.82018
PC4	aging	notissue	0.05779	s8	-90.9436	700	93	Cortex	6.53916
PC4	aging	notissue	0.05779	s9	83.5231	705	93	Cortex	6.53916
PC4	aging	notissue	0.05779	s10	9.25024	2053	144	Cortex	7.16993
PC4	aging	notissue	0.05779	s11	31.8429	1753	232	Cortex	7.85798
PC4	aging	notissue	0.05779	s12	-1.07858	1625	303	Cortex	8.24317
PC4	aging	notissue	0.05779	s13	30.2866	586	649	Cortex	9.34207
PC4	aging	notissue	0.05779	s14	-23.3649	561	654	Cortex	9.35315
PC4	aging	notissue	0.05779	s15	-39.5159	457	904	Cortex	9.82018
PC4	aging	notissue	0.05779	s23	-20.1616	700	93	Lung	6.53916
PC4	aging	notissue	0.05779	s24	5.95459	705	93	Lung	6.53916
PC4	aging	notissue	0.05779	s25	-3.40431	2053	144	Lung	7.16993
PC4	aging	notissue	0.05779	s26	-7.3429	1753	232	Lung	7.85798
PC4	aging	notissue	0.05779	s27	-27.4789	1625	303	Lung	8.24317
PC4	aging	notissue	0.05779	s28	-9.2222	586	649	Lung	9.34207
PC4	aging	notissue	0.05779	s29	46.7573	561	654	Lung	9.35315
PC4	aging	notissue	0.05779	s30	15.1134	457	904	Lung	9.82018
PC4	aging	notissue	0.05779	s31	-0.215359	465	904	Lung	9.82018
PC4	aging	notissue	0.05779	s39	19.5368	700	93	Liver	6.53916
PC4	aging	notissue	0.05779	s40	-13.3141	705	93	Liver	6.53916
PC4	aging	notissue	0.05779	s41	0.170278	2053	144	Liver	7.16993
PC4	aging	notissue	0.05779	s42	1.3876	1753	232	Liver	7.85798
PC4	aging	notissue	0.05779	s43	-34.0667	1625	303	Liver	8.24317
PC4	aging	notissue	0.05779	s44	-16.6242	586	649	Liver	9.34207
PC4	aging	notissue	0.05779	s45	4.1805	561	654	Liver	9.35315
PC4	aging	notissue	0.05779	s46	21.9435	457	904	Liver	9.82018
PC4	aging	notissue	0.05779	s47	16.7863	465	904	Liver	9.82018
PC4	aging	notissue	0.05779	s55	-20.8438	700	93	Muscle	6.53916
PC4	aging	notissue	0.05779	s56	-2.59596	705	93	Muscle	6.53916
PC4	aging	notissue	0.05779	s57	-1.4989	2053	144	Muscle	7.16993
PC4	aging	notissue	0.05779	s58	-11.6897	1753	232	Muscle	7.85798
PC4	aging	notissue	0.05779	s59	24.1098	1625	303	Muscle	8.24317
PC4	aging	notissue	0.05779	s60	12.2695	586	649	Muscle	9.34207
PC4	aging	notissue	0.05779	s61	9.86907	561	654	Muscle	9.35315
PC4	aging	notissue	0.05779	s62	-38.1333	457	904	Muscle	9.82018
PC4	aging	notissue	0.05779	s63	28.5132	465	904	Muscle	9.82018
PC1	all	raw	0.30965	s1	-110.846	841	2	Cortex	1
PC1	all	raw	0.30965	s2	-110.471	842	2	Cortex	1
PC1	all	raw	0.30965	s3	-115.913	833	5	Cortex	2.32193
PC1	all	raw	0.30965	s4	-120.817	2260	11	Cortex	3.45943
PC1	all	raw	0.30965	s5	-123.574	460502	20	Cortex	4.32193
PC1	all	raw	0.30965	s6	-120.348	2067	32	Cortex	5
PC1	all	raw	0.30965	s7	-116.402	1979	61	Cortex	5.93074
PC1	all	raw	0.30965	s8	-120.967	700	93	Cortex	6.53916
PC1	all	raw	0.30965	s9	-122.864	705	93	Cortex	6.53916
PC1	all	raw	0.30965	s10	-119.873	2053	144	Cortex	7.16993
PC1	all	raw	0.30965	s11	-123.914	1753	232	Cortex	7.85798
PC1	all	raw	0.30965	s12	-116.153	1625	303	Cortex	8.24317
PC1	all	raw	0.30965	s13	-116.078	586	649	Cortex	9.34207
PC1	all	raw	0.30965	s14	-117.514	561	654	Cortex	9.35315
PC1	all	raw	0.30965	s15	-115.923	457	904	Cortex	9.82018
PC1	all	raw	0.30965	s16	18.461	841	2	Lung	1
PC1	all	raw	0.30965	s17	14.0984	842	2	Lung	1
PC1	all	raw	0.30965	s18	15.9788	833	5	Lung	2.32193
PC1	all	raw	0.30965	s19	18.2556	2260	11	Lung	3.45943
PC1	all	raw	0.30965	s20	25.8303	460502	20	Lung	4.32193
PC1	all	raw	0.30965	s21	32.3768	2067	32	Lung	5
PC1	all	raw	0.30965	s22	30.0067	1979	61	Lung	5.93074
PC1	all	raw	0.30965	s23	32.3044	700	93	Lung	6.53916
PC1	all	raw	0.30965	s24	23.6496	705	93	Lung	6.53916
PC1	all	raw	0.30965	s25	28.8063	2053	144	Lung	7.16993
PC1	all	raw	0.30965	s26	29.1804	1753	232	Lung	7.85798
PC1	all	raw	0.30965	s27	34.7228	1625	303	Lung	8.24317
PC1	all	raw	0.30965	s28	31.4342	586	649	Lung	9.34207
PC1	all	raw	0.30965	s29	39.9947	561	654	Lung	9.35315
PC1	all	raw	0.30965	s30	46.952	457	904	Lung	9.82018
PC1	all	raw	0.30965	s31	41.3875	465	904	Lung	9.82018
PC1	all	raw	0.30965	s32	56.423	841	2	Liver	1
PC1	all	raw	0.30965	s33	54.9718	842	2	Liver	1
PC1	all	raw	0.30965	s34	56.9384	833	5	Liver	2.32193
PC1	all	raw	0.30965	s35	55.6247	2260	11	Liver	3.45943
PC1	all	raw	0.30965	s36	60.2421	460502	20	Liver	4.32193
PC1	all	raw	0.30965	s37	60.5248	2067	32	Liver	5
PC1	all	raw	0.30965	s38	58.4384	1979	61	Liver	5.93074
PC1	all	raw	0.30965	s39	57.2264	700	93	Liver	6.53916
PC1	all	raw	0.30965	s40	54.7158	705	93	Liver	6.53916
PC1	all	raw	0.30965	s41	59.6533	2053	144	Liver	7.16993
PC1	all	raw	0.30965	s42	57.3596	1753	232	Liver	7.85798
PC1	all	raw	0.30965	s43	57.5187	1625	303	Liver	8.24317
PC1	all	raw	0.30965	s44	60.4773	586	649	Liver	9.34207
PC1	all	raw	0.30965	s45	63.744	561	654	Liver	9.35315
PC1	all	raw	0.30965	s46	65.106	457	904	Liver	9.82018
PC1	all	raw	0.30965	s47	65.075	465	904	Liver	9.82018
PC1	all	raw	0.30965	s48	19.2997	841	2	Muscle	1
PC1	all	raw	0.30965	s49	20.6574	842	2	Muscle	1
PC1	all	raw	0.30965	s50	22.9863	833	5	Muscle	2.32193
PC1	all	raw	0.30965	s51	26.7648	2260	11	Muscle	3.45943
PC1	all	raw	0.30965	s52	42.1023	460502	20	Muscle	4.32193
PC1	all	raw	0.30965	s53	26.058	2067	32	Muscle	5
PC1	all	raw	0.30965	s54	19.7359	1979	61	Muscle	5.93074
PC1	all	raw	0.30965	s55	24.1707	700	93	Muscle	6.53916
PC1	all	raw	0.30965	s56	15.3057	705	93	Muscle	6.53916
PC1	all	raw	0.30965	s57	22.0923	2053	144	Muscle	7.16993
PC1	all	raw	0.30965	s58	20.8698	1753	232	Muscle	7.85798
PC1	all	raw	0.30965	s59	19.8785	1625	303	Muscle	8.24317
PC1	all	raw	0.30965	s60	13.5101	586	649	Muscle	9.34207
PC1	all	raw	0.30965	s61	15.9238	561	654	Muscle	9.35315
PC1	all	raw	0.30965	s62	35.2829	457	904	Muscle	9.82018
PC1	all	raw	0.30965	s63	19.5382	465	904	Muscle	9.82018
PC2	all	raw	0.20099	s1	-1.7767	841	2	Cortex	1
PC2	all	raw	0.20099	s2	6.47426	842	2	Cortex	1
PC2	all	raw	0.20099	s3	1.43895	833	5	Cortex	2.32193
PC2	all	raw	0.20099	s4	-6.46517	2260	11	Cortex	3.45943
PC2	all	raw	0.20099	s5	-11.0728	460502	20	Cortex	4.32193
PC2	all	raw	0.20099	s6	-11.4217	2067	32	Cortex	5
PC2	all	raw	0.20099	s7	-8.608	1979	61	Cortex	5.93074
PC2	all	raw	0.20099	s8	-17.3919	700	93	Cortex	6.53916
PC2	all	raw	0.20099	s9	-9.35295	705	93	Cortex	6.53916
PC2	all	raw	0.20099	s10	-7.97683	2053	144	Cortex	7.16993
PC2	all	raw	0.20099	s11	-9.80108	1753	232	Cortex	7.85798
PC2	all	raw	0.20099	s12	-8.40504	1625	303	Cortex	8.24317
PC2	all	raw	0.20099	s13	-6.31463	586	649	Cortex	9.34207
PC2	all	raw	0.20099	s14	-8.06617	561	654	Cortex	9.35315
PC2	all	raw	0.20099	s15	-8.08438	457	904	Cortex	9.82018
PC2	all	raw	0.20099	s16	81.4081	841	2	Lung	1
PC2	all	raw	0.20099	s17	81.1246	842	2	Lung	1
PC2	all	raw	0.20099	s18	78.73	833	5	Lung	2.32193
PC2	all	raw	0.20099	s19	83.6857	2260	11	Lung	3.45943
PC2	all	raw	0.20099	s20	84.4783	460502	20	Lung	4.32193
PC2	all	raw	0.20099	s21	81.8459	2067	32	Lung	5
PC2	all	raw	0.20099	s22	82.219	1979	61	Lung	5.93074
PC2	all	raw	0.20099	s23	86.7102	700	93	Lung	6.53916
PC2	all	raw	0.20099	s24	83.2778	705	93	Lung	6.53916
PC2	all	raw	0.20099	s25	86.728	2053	144	Lung	7.16993
PC2	all	raw	0.20099	s26	86.1209	1753	232	Lung	7.85798
PC2	all	raw	0.20099	s27	81.6577	1625	303	Lung	8.24317
PC2	all	raw	0.20099	s28	86.3235	586	649	Lung	9.34207
PC2	all	raw	0.20099	s29	62.9726	561	654	Lung	9.35315
PC2	all	raw	0.20099	s30	66.9049	457	904	Lung	9.82018
PC2	all	raw	0.20099	s31	85.1248	465	904	Lung	9.82018
PC2	all	raw	0.20099	s32	-8.00117	841	2	Liver	1
PC2	all	raw	0.20099	s33	-11.3403	842	2	Liver	1
PC2	all	raw	0.20099	s34	-7.88498	833	5	Liver	2.32193
PC2	all	raw	0.20099	s35	-26.9229	2260	11	Liver	3.45943
PC2	all	raw	0.20099	s36	-41.9517	460502	20	Liver	4.32193
PC2	all	raw	0.20099	s37	-55.0926	2067	32	Liver	5
PC2	all	raw	0.20099	s38	-58.1745	1979	61	Liver	5.93074
PC2	all	raw	0.20099	s39	-47.1424	700	93	Liver	6.53916
PC2	all	raw	0.20099	s40	-63.6633	705	93	Liver	6.53916
PC2	all	raw	0.20099	s41	-54.8017	2053	144	Liver	7.16993
PC2	all	raw	0.20099	s42	-59.5032	1753	232	Liver	7.85798
PC2	all	raw	0.20099	s43	-61.045	1625	303	Liver	8.24317
PC2	all	raw	0.20099	s44	-58.5456	586	649	Liver	9.34207
PC2	all	raw	0.20099	s45	-44.4333	561	654	Liver	9.35315
PC2	all	raw	0.20099	s46	-37.9042	457	904	Liver	9.82018
PC2	all	raw	0.20099	s47	-41.613	465	904	Liver	9.82018
PC2	all	raw	0.20099	s48	30.0015	841	2	Muscle	1
PC2	all	raw	0.20099	s49	32.1057	842	2	Muscle	1
PC2	all	raw	0.20099	s50	24.958	833	5	Muscle	2.32193
PC2	all	raw	0.20099	s51	42.8171	2260	11	Muscle	3.45943
PC2	all	raw	0.20099	s52	19.5395	460502	20	Muscle	4.32193
PC2	all	raw	0.20099	s53	-39.1181	2067	32	Muscle	5
PC2	all	raw	0.20099	s54	-74.6473	1979	61	Muscle	5.93074
PC2	all	raw	0.20099	s55	-62.7308	700	93	Muscle	6.53916
PC2	all	raw	0.20099	s56	-73.0547	705	93	Muscle	6.53916
PC2	all	raw	0.20099	s57	-52.1812	2053	144	Muscle	7.16993
PC2	all	raw	0.20099	s58	-63.6029	1753	232	Muscle	7.85798
PC2	all	raw	0.20099	s59	-63.3126	1625	303	Muscle	8.24317
PC2	all	raw	0.20099	s60	-65.4125	586	649	Muscle	9.34207
PC2	all	raw	0.20099	s61	-67.6771	561	654	Muscle	9.35315
PC2	all	raw	0.20099	s62	-54.6017	457	904	Muscle	9.82018
PC2	all	raw	0.20099	s63	-47.5508	465	904	Muscle	9.82018
PC3	all	raw	0.16585	s1	-12.9681	841	2	Cortex	1
PC3	all	raw	0.16585	s2	-16.1955	842	2	Cortex	1
PC3	all	raw	0.16585	s3	-16.4655	833	5	Cortex	2.32193
PC3	all	raw	0.16585	s4	-18.4842	2260	11	Cortex	3.45943
PC3	all	raw	0.16585	s5	-19.7965	460502	20	Cortex	4.32193
PC3	all	raw	0.16585	s6	-17.338	2067	32	Cortex	5
PC3	all	raw	0.16585	s7	-17.226	1979	61	Cortex	5.93074
PC3	all	raw	0.16585	s8	-16.8116	700	93	Cortex	6.53916
PC3	all	raw	0.16585	s9	-17.9578	705	93	Cortex	6.53916
PC3	all	raw	0.16585	s10	-18.5158	2053	144	Cortex	7.16993
PC3	all	raw	0.16585	s11	-18.6017	1753	232	Cortex	7.85798
PC3	all	raw	0.16585	s12	-15.9764	1625	303	Cortex	8.24317
PC3	all	raw	0.16585	s13	-16.4183	586	649	Cortex	9.34207
PC3	all	raw	0.16585	s14	-17.9787	561	654	Cortex	9.35315
PC3	all	raw	0.16585	s15	-17.8664	457	904	Cortex	9.82018
PC3	all	raw	0.16585	s16	7.40537	841	2	Lung	1
PC3	all	raw	0.16585	s17	10.4542	842	2	Lung	1
PC3	all	raw	0.16585	s18	13.45	833	5	Lung	2.32193
PC3	all	raw	0.16585	s19	11.3994	2260	11	Lung	3.45943
PC3	all	raw	0.16585	s20	7.68182	460502	20	Lung	4.32193
PC3	all	raw	0.16585	s21	8.7824	2067	32	Lung	5
PC3	all	raw	0.16585	s22	4.09572	1979	61	Lung	5.93074
PC3	all	raw	0.16585	s23	5.36294	700	93	Lung	6.53916
PC3	all	raw	0.16585	s24	2.32649	705	93	Lung	6.53916
PC3	all	raw	0.16585	s25	4.24697	2053	144	Lung	7.16993
PC3	all	raw	0.16585	s26	3.90724	1753	232	Lung	7.85798
PC3	all	raw	0.16585	s27	6.64131	1625	303	Lung	8.24317
PC3	all	raw	0.16585	s28	4.90077	586	649	Lung	9.34207
PC3	all	raw	0.16585	s29	2.02837	561	654	Lung	9.35315
PC3	all	raw	0.16585	s30	-4.50125	457	904	Lung	9.82018
PC3	all	raw	0.16585	s31	0.846178	465	904	Lung	9.82018
PC3	all	raw	0.16585	s32	-49.0699	841	2	Liver	1
PC3	all	raw	0.16585	s33	-49.6155	842	2	Liver	1
PC3	all	raw	0.16585	s34	-53.6406	833	5	Liver	2.32193
PC3	all	raw	0.16585	s35	-60.329	2260	11	Liver	3.45943
PC3	all	raw	0.16585	s36	-61.9102	460502	20	Liver	4.32193
PC3	all	raw	0.16585	s37	-62.581	2067	32	Liver	5
PC3	all	raw	0.16585	s38	-61.092	1979	61	Liver	5.93074
PC3	all	raw	0.16585	s39	-64.7104	700	93	Liver	6.53916
PC3	all	raw	0.16585	s40	-64.8506	705	93	Liver	6.53916
PC3	all	raw	0.16585	s41	-64.342	2053	144	Liver	7.16993
PC3	all	raw	0.16585	s42	-66.7016	1753	232	Liver	7.85798
PC3	all	raw	0.16585	s43	-62.2674	1625	303	Liver	8.24317
PC3	all	raw	0.16585	s44	-62.7654	586	649	Liver	9.34207
PC3	all	raw	0.16585	s45	-62.6241	561	654	Liver	9.35315
PC3	all	raw	0.16585	s46	-64.7402	457	904	Liver	9.82018
PC3	all	raw	0.16585	s47	-63.6318	465	904	Liver	9.82018
PC3	all	raw	0.16585	s48	42.1175	841	2	Muscle	1
PC3	all	raw	0.16585	s49	39.5558	842	2	Muscle	1
PC3	all	raw	0.16585	s50	46.4631	833	5	Muscle	2.32193
PC3	all	raw	0.16585	s51	31.4687	2260	11	Muscle	3.45943
PC3	all	raw	0.16585	s52	36.7205	460502	20	Muscle	4.32193
PC3	all	raw	0.16585	s53	77.1786	2067	32	Muscle	5
PC3	all	raw	0.16585	s54	89.1812	1979	61	Muscle	5.93074
PC3	all	raw	0.16585	s55	88.6482	700	93	Muscle	6.53916
PC3	all	raw	0.16585	s56	92.2025	705	93	Muscle	6.53916
PC3	all	raw	0.16585	s57	83.0174	2053	144	Muscle	7.16993
PC3	all	raw	0.16585	s58	90.0445	1753	232	Muscle	7.85798
PC3	all	raw	0.16585	s59	83.829	1625	303	Muscle	8.24317
PC3	all	raw	0.16585	s60	89.9881	586	649	Muscle	9.34207
PC3	all	raw	0.16585	s61	89.336	561	654	Muscle	9.35315
PC3	all	raw	0.16585	s62	82.8228	457	904	Muscle	9.82018
PC3	all	raw	0.16585	s63	81.8705	465	904	Muscle	9.82018
PC4	all	raw	0.07943	s1	47.8254	841	2	Cortex	1
PC4	all	raw	0.07943	s2	47.5043	842	2	Cortex	1
PC4	all	raw	0.07943	s3	38.7171	833	5	Cortex	2.32193
PC4	all	raw	0.07943	s4	13.6552	2260	11	Cortex	3.45943
PC4	all	raw	0.07943	s5	-9.48374	460502	20	Cortex	4.32193
PC4	all	raw	0.07943	s6	-12.5963	2067	32	Cortex	5
PC4	all	raw	0.07943	s7	-11.4144	1979	61	Cortex	5.93074
PC4	all	raw	0.07943	s8	-15.8741	700	93	Cortex	6.53916
PC4	all	raw	0.07943	s9	-13.847	705	93	Cortex	6.53916
PC4	all	raw	0.07943	s10	-11.5652	2053	144	Cortex	7.16993
PC4	all	raw	0.07943	s11	-15.2075	1753	232	Cortex	7.85798
PC4	all	raw	0.07943	s12	-12.1021	1625	303	Cortex	8.24317
PC4	all	raw	0.07943	s13	-11.788	586	649	Cortex	9.34207
PC4	all	raw	0.07943	s14	-15.3427	561	654	Cortex	9.35315
PC4	all	raw	0.07943	s15	-14.5734	457	904	Cortex	9.82018
PC4	all	raw	0.07943	s16	22.4293	841	2	Lung	1
PC4	all	raw	0.07943	s17	19.9561	842	2	Lung	1
PC4	all	raw	0.07943	s18	29.7772	833	5	Lung	2.32193
PC4	all	raw	0.07943	s19	5.14389	2260	11	Lung	3.45943
PC4	all	raw	0.07943	s20	-26.8197	460502	20	Lung	4.32193
PC4	all	raw	0.07943	s21	-30.5591	2067	32	Lung	5
PC4	all	raw	0.07943	s22	-45.0901	1979	61	Lung	5.93074
PC4	all	raw	0.07943	s23	-38.3161	700	93	Lung	6.53916
PC4	all	raw	0.07943	s24	-51.5349	705	93	Lung	6.53916
PC4	all	raw	0.07943	s25	-43.0699	2053	144	Lung	7.16993
PC4	all	raw	0.07943	s26	-39.7523	1753	232	Lung	7.85798
PC4	all	raw	0.07943	s27	-32.8016	1625	303	Lung	8.24317
PC4	all	raw	0.07943	s28	-38.211	586	649	Lung	9.34207
PC4	all	raw	0.07943	s29	-25.8371	561	654	Lung	9.35315
PC4	all	raw	0.07943	s30	-15.8092	457	904	Lung	9.82018
PC4	all	raw	0.07943	s31	-26.4523	465	904	Lung	9.82018
PC4	all	raw	0.07943	s32	64.5733	841	2	Liver	1
PC4	all	raw	0.07943	s33	58.7888	842	2	Liver	1
PC4	all	raw	0.07943	s34	53.4606	833	5	Liver	2.32193
PC4	all	raw	0.07943	s35	24.3131	2260	11	Liver	3.45943
PC4	all	raw	0.07943	s36	7.0712	460502	20	Liver	4.32193
PC4	all	raw	0.07943	s37	-2.17399	2067	32	Liver	5
PC4	all	raw	0.07943	s38	-8.27615	1979	61	Liver	5.93074
PC4	all	raw	0.07943	s39	-13.2219	700	93	Liver	6.53916
PC4	all	raw	0.07943	s40	-18.6627	705	93	Liver	6.53916
PC4	all	raw	0.07943	s41	-15.0653	2053	144	Liver	7.16993
PC4	all	raw	0.07943	s42	-17.1747	1753	232	Liver	7.85798
PC4	all	raw	0.07943	s43	-13.7258	1625	303	Liver	8.24317
PC4	all	raw	0.07943	s44	-12.9348	586	649	Liver	9.34207
PC4	all	raw	0.07943	s45	-6.41861	561	654	Liver	9.35315
PC4	all	raw	0.07943	s46	-12.7713	457	904	Liver	9.82018
PC4	all	raw	0.07943	s47	-12.2978	465	904	Liver	9.82018
PC4	all	raw	0.07943	s48	88.2242	841	2	Muscle	1
PC4	all	raw	0.07943	s49	90.9909	842	2	Muscle	1
PC4	all	raw	0.07943	s50	82.8188	833	5	Muscle	2.32193
PC4	all	raw	0.07943	s51	69.862	2260	11	Muscle	3.45943
PC4	all	raw	0.07943	s52	73.6259	460502	20	Muscle	4.32193
PC4	all	raw	0.07943	s53	8.31432	2067	32	Muscle	5
PC4	all	raw	0.07943	s54	-18.0564	1979	61	Muscle	5.93074
PC4	all	raw	0.07943	s55	-12.3919	700	93	Muscle	6.53916
PC4	all	raw	0.07943	s56	-22.7228	705	93	Muscle	6.53916
PC4	all	raw	0.07943	s57	-10.2562	2053	144	Muscle	7.16993
PC4	all	raw	0.07943	s58	-17.2197	1753	232	Muscle	7.85798
PC4	all	raw	0.07943	s59	-16.0475	1625	303	Muscle	8.24317
PC4	all	raw	0.07943	s60	-16.8747	586	649	Muscle	9.34207
PC4	all	raw	0.07943	s61	-17.5155	561	654	Muscle	9.35315
PC4	all	raw	0.07943	s62	-14.1842	457	904	Muscle	9.82018
PC4	all	raw	0.07943	s63	-11.012	465	904	Muscle	9.82018
PC1	all	notissue	0.18882	s1	-101.626	841	2	Cortex	1
PC1	all	notissue	0.18882	s2	-113.933	842	2	Cortex	1
PC1	all	notissue	0.18882	s3	-88.7082	833	5	Cortex	2.32193
PC1	all	notissue	0.18882	s4	-26.8709	2260	11	Cortex	3.45943
PC1	all	notissue	0.18882	s5	20.8225	460502	20	Cortex	4.32193
PC1	all	notissue	0.18882	s6	29.6748	2067	32	Cortex	5
PC1	all	notissue	0.18882	s7	27.9713	1979	61	Cortex	5.93074
PC1	all	notissue	0.18882	s8	44.3539	700	93	Cortex	6.53916
PC1	all	notissue	0.18882	s9	24.4774	705	93	Cortex	6.53916
PC1	all	notissue	0.18882	s10	25.6836	2053	144	Cortex	7.16993
PC1	all	notissue	0.18882	s11	30.1427	1753	232	Cortex	7.85798
PC1	all	notissue	0.18882	s12	30.2139	1625	303	Cortex	8.24317
PC1	all	notissue	0.18882	s13	26.4577	586	649	Cortex	9.34207
PC1	all	notissue	0.18882	s14	36.1188	561	654	Cortex	9.35315
PC1	all	notissue	0.18882	s15	35.222	457	904	Cortex	9.82018
PC1	all	notissue	0.18882	s16	-75.1766	841	2	Lung	1
PC1	all	notissue	0.18882	s17	-74.0487	842	2	Lung	1
PC1	all	notissue	0.18882	s18	-79.8147	833	5	Lung	2.32193
PC1	all	notissue	0.18882	s19	-50.5734	2260	11	Lung	3.45943
PC1	all	notissue	0.18882	s20	-4.55334	460502	20	Lung	4.32193
PC1	all	notissue	0.18882	s21	17.6091	2067	32	Lung	5
PC1	all	notissue	0.18882	s22	33.0088	1979	61	Lung	5.93074
PC1	all	notissue	0.18882	s23	24.4608	700	93	Lung	6.53916
PC1	all	notissue	0.18882	s24	38.0832	705	93	Lung	6.53916
PC1	all	notissue	0.18882	s25	24.7865	2053	144	Lung	7.16993
PC1	all	notissue	0.18882	s26	22.6766	1753	232	Lung	7.85798
PC1	all	notissue	0.18882	s27	31.0368	1625	303	Lung	8.24317
PC1	all	notissue	0.18882	s28	26.8389	586	649	Lung	9.34207
PC1	all	notissue	0.18882	s29	41.004	561	654	Lung	9.35315
PC1	all	notissue	0.18882	s30	7.05856	457	904	Lung	9.82018
PC1	all	notissue	0.18882	s31	17.6036	465	904	Lung	9.82018
PC1	all	notissue	0.18882	s32	-100.539	841	2	Liver	1
PC1	all	notissue	0.18882	s33	-94.3056	842	2	Liver	1
PC1	all	notissue	0.18882	s34	-88.427	833	5	Liver	2.32193
PC1	all	notissue	0.18882	s35	-41.9491	2260	11	Liver	3.45943
PC1	all	notissue	0.18882	s36	-5.14008	460502	20	Liver	4.32193
PC1	all	notissue	0.18882	s37	18.1738	2067	32	Liver	5
PC1	all	notissue	0.18882	s38	23.3561	1979	61	Liver	5.93074
PC1	all	notissue	0.18882	s39	25.8117	700	93	Liver	6.53916
PC1	all	notissue	0.18882	s40	44.3156	705	93	Liver	6.53916
PC1	all	notissue	0.18882	s41	33.3742	2053	144	Liver	7.16993
PC1	all	notissue	0.18882	s42	38.0064	1753	232	Liver	7.85798
PC1	all	notissue	0.18882	s43	34.2293	1625	303	Liver	8.24317
PC1	all	notissue	0.18882	s44	38.7505	586	649	Liver	9.34207
PC1	all	notissue	0.18882	s45	23.6668	561	654	Liver	9.35315
PC1	all	notissue	0.18882	s46	22.8004	457	904	Liver	9.82018
PC1	all	notissue	0.18882	s47	27.8756	465	904	Liver	9.82018
PC1	all	notissue	0.18882	s48	-108.614	841	2	Muscle	1
PC1	all	notissue	0.18882	s49	-111.272	842	2	Muscle	1
PC1	all	notissue	0.18882	s50	-92.7126	833	5	Muscle	2.32193
PC1	all	notissue	0.18882	s51	-93.9538	2260	11	Muscle	3.45943
PC1	all	notissue	0.18882	s52	-62.3756	460502	20	Muscle	4.32193
PC1	all	notissue	0.18882	s53	19.0179	2067	32	Muscle	5
PC1	all	notissue	0.18882	s54	52.4491	1979	61	Muscle	5.93074
PC1	all	notissue	0.18882	s55	40.1334	700	93	Muscle	6.53916
PC1	all	notissue	0.18882	s56	52.0022	705	93	Muscle	6.53916
PC1	all	notissue	0.18882	s57	33.2276	2053	144	Muscle	7.16993
PC1	all	notissue	0.18882	s58	43.0639	1753	232	Muscle	7.85798
PC1	all	notissue	0.18882	s59	52.8188	1625	303	Muscle	8.24317
PC1	all	notissue	0.18882	s60	46.339	586	649	Muscle	9.34207
PC1	all	notissue	0.18882	s61	47.3762	561	654	Muscle	9.35315
PC1	all	notissue	0.18882	s62	42.5526	457	904	Muscle	9.82018
PC1	all	notissue	0.18882	s63	39.9471	465	904	Muscle	9.82018
PC2	all	notissue	0.11932	s1	109.252	841	2	Cortex	1
PC2	all	notissue	0.11932	s2	76.8995	842	2	Cortex	1
PC2	all	notissue	0.11932	s3	70.7978	833	5	Cortex	2.32193
PC2	all	notissue	0.11932	s4	8.43488	2260	11	Cortex	3.45943
PC2	all	notissue	0.11932	s5	-10.1209	460502	20	Cortex	4.32193
PC2	all	notissue	0.11932	s6	-13.8651	2067	32	Cortex	5
PC2	all	notissue	0.11932	s7	-34.6894	1979	61	Cortex	5.93074
PC2	all	notissue	0.11932	s8	-9.21464	700	93	Cortex	6.53916
PC2	all	notissue	0.11932	s9	10.5021	705	93	Cortex	6.53916
PC2	all	notissue	0.11932	s10	-31.7671	2053	144	Cortex	7.16993
PC2	all	notissue	0.11932	s11	-5.63535	1753	232	Cortex	7.85798
PC2	all	notissue	0.11932	s12	-33.4869	1625	303	Cortex	8.24317
PC2	all	notissue	0.11932	s13	-42.8779	586	649	Cortex	9.34207
PC2	all	notissue	0.11932	s14	-41.9437	561	654	Cortex	9.35315
PC2	all	notissue	0.11932	s15	-52.2855	457	904	Cortex	9.82018
PC2	all	notissue	0.11932	s16	48.2561	841	2	Lung	1
PC2	all	notissue	0.11932	s17	73.0357	842	2	Lung	1
PC2	all	notissue	0.11932	s18	50.2312	833	5	Lung	2.32193
PC2	all	notissue	0.11932	s19	37.2843	2260	11	Lung	3.45943
PC2	all	notissue	0.11932	s20	30.5171	460502	20	Lung	4.32193
PC2	all	notissue	0.11932	s21	-7.06196	2067	32	Lung	5
PC2	all	notissue	0.11932	s22	11.7271	1979	61	Lung	5.93074
PC2	all	notissue	0.11932	s23	-24.1073	700	93	Lung	6.53916
PC2	all	notissue	0.11932	s24	30.1272	705	93	Lung	6.53916
PC2	all	notissue	0.11932	s25	-3.15397	2053	144	Lung	7.16993
PC2	all	notissue	0.11932	s26	-11.4084	1753	232	Lung	7.85798
PC2	all	notissue	0.11932	s27	-52.6004	1625	303	Lung	8.24317
PC2	all	notissue	0.11932	s28	-41.2882	586	649	Lung	9.34207
PC2	all	notissue	0.11932	s29	-38.3855	561	654	Lung	9.35315
PC2	all	notissue	0.11932	s30	-23.2666	457	904	Lung	9.82018
PC2	all	notissue	0.11932	s31	-79.9064	465	904	Lung	9.82018
PC2	all	notissue	0.11932	s32	-43.6663	841	2	Liver	1
PC2	all	notissue	0.11932	s33	-17.4112	842	2	Liver	1
PC2	all	notissue	0.11932	s34	-49.4778	833	5	Liver	2.32193
PC2	all	notissue	0.11932	s35	-1.97284	2260	11	Liver	3.45943
PC2	all	notissue	0.11932	s36	5.87906	460502	20	Liver	4.32193
PC2	all	notissue	0.11932	s37	18.8071	2067	32	Liver	5
PC2	all	notissue	0.11932	s38	40.0535	1979	61	Liver	5.93074
PC2	all	notissue	0.11932	s39	4.07735	700	93	Liver	6.53916
PC2	all	notissue	0.11932	s40	48.2335	705	93	Liver	6.53916
PC2	all	notissue	0.11932	s41	20.9214	2053	144	Liver	7.16993
PC2	all	notissue	0.11932	s42	37.1822	1753	232	Liver	7.85798
PC2	all	notissue	0.11932	s43	39.0909	1625	303	Liver	8.24317
PC2	all	notissue	0.11932	s44	6.08372	586	649	Liver	9.34207
PC2	all	notissue	0.11932	s45	-41.4346	561	654	Liver	9.35315
PC2	all	notissue	0.11932	s46	-32.4424	457	904	Liver	9.82018
PC2	all	notissue	0.11932	s47	-33.9235	465	904	Liver	9.82018
PC2	all	notissue	0.11932	s48	-37.2385	841	2	Muscle	1
PC2	all	notissue	0.11932	s49	-39.9354	842	2	Muscle	1
PC2	all	notissue	0.11932	s50	-53.455	833	5	Muscle	2.32193
PC2	all	notissue	0.11932	s51	-55.0573	2260	11	Muscle	3.45943
PC2	all	notissue	0.11932	s52	-113.28	460502	20	Muscle	4.32193
PC2	all	notissue	0.11932	s53	-11.6199	2067	32	Muscle	5
PC2	all	notissue	0.11932	s54	52.5439	1979	61	Muscle	5.93074
PC2	all	notissue	0.11932	s55	33.9535	700	93	Muscle	6.53916
PC2	all	notissue	0.11932	s56	57.6092	705	93	Muscle	6.53916
PC2	all	notissue	0.11932	s57	20.8994	2053	144	Muscle	7.16993
PC2	all	notissue	0.11932	s58	39.9217	1753	232	Muscle	7.85798
PC2	all	notissue	0.11932	s59	23.3247	1625	303	Muscle	8.24317
PC2	all	notissue	0.11932	s60	37.9379	586	649	Muscle	9.34207
PC2	all	notissue	0.11932	s61	39.9062	561	654	Muscle	9.35315
PC2	all	notissue	0.11932	s62	10.2306	457	904	Muscle	9.82018
PC2	all	notissue	0.11932	s63	-5.74123	465	904	Muscle	9.82018
PC3	all	notissue	0.06854	s1	-61.6455	841	2	Cortex	1
PC3	all	notissue	0.06854	s2	-39.6849	842	2	Cortex	1
PC3	all	notissue	0.06854	s3	-36.2282	833	5	Cortex	2.32193
PC3	all	notissue	0.06854	s4	-7.98937	2260	11	Cortex	3.45943
PC3	all	notissue	0.06854	s5	21.3239	460502	20	Cortex	4.32193
PC3	all	notissue	0.06854	s6	14.7754	2067	32	Cortex	5
PC3	all	notissue	0.06854	s7	16.0008	1979	61	Cortex	5.93074
PC3	all	notissue	0.06854	s8	5.28421	700	93	Cortex	6.53916
PC3	all	notissue	0.06854	s9	20.7514	705	93	Cortex	6.53916
PC3	all	notissue	0.06854	s10	14.9302	2053	144	Cortex	7.16993
PC3	all	notissue	0.06854	s11	20.1319	1753	232	Cortex	7.85798
PC3	all	notissue	0.06854	s12	9.78173	1625	303	Cortex	8.24317
PC3	all	notissue	0.06854	s13	10.8642	586	649	Cortex	9.34207
PC3	all	notissue	0.06854	s14	9.50319	561	654	Cortex	9.35315
PC3	all	notissue	0.06854	s15	2.20114	457	904	Cortex	9.82018
PC3	all	notissue	0.06854	s16	22.5197	841	2	Lung	1
PC3	all	notissue	0.06854	s17	26.1961	842	2	Lung	1
PC3	all	notissue	0.06854	s18	19.2957	833	5	Lung	2.32193
PC3	all	notissue	0.06854	s19	39.0396	2260	11	Lung	3.45943
PC3	all	notissue	0.06854	s20	33.5715	460502	20	Lung	4.32193
PC3	all	notissue	0.06854	s21	-5.36264	2067	32	Lung	5
PC3	all	notissue	0.06854	s22	26.1021	1979	61	Lung	5.93074
PC3	all	notissue	0.06854	s23	10.4686	700	93	Lung	6.53916
PC3	all	notissue	0.06854	s24	40.1312	705	93	Lung	6.53916
PC3	all	notissue	0.06854	s25	15.214	2053	144	Lung	7.16993
PC3	all	notissue	0.06854	s26	19.3817	1753	232	Lung	7.85798
PC3	all	notissue	0.06854	s27	8.22775	1625	303	Lung	8.24317
PC3	all	notissue	0.06854	s28	2.4788	586	649	Lung	9.34207
PC3	all	notissue	0.06854	s29	-81.154	561	654	Lung	9.35315
PC3	all	notissue	0.06854	s30	-139.281	457	904	Lung	9.82018
PC3	all	notissue	0.06854	s31	-36.8291	465	904	Lung	9.82018
PC3	all	notissue	0.06854	s32	-43.4655	841	2	Liver	1
PC3	all	notissue	0.06854	s33	-43.1422	842	2	Liver	1
PC3	all	notissue	0.06854	s34	-21.289	833	5	Liver	2.32193
PC3	all	notissue	0.06854	s35	11.4553	2260	11	Liver	3.45943
PC3	all	notissue	0.06854	s36	8.13417	460502	20	Liver	4.32193
PC3	all	notissue	0.06854	s37	7.09286	2067	32	Liver	5
PC3	all	notissue	0.06854	s38	6.89072	1979	61	Liver	5.93074
PC3	all	notissue	0.06854	s39	23.1609	700	93	Liver	6.53916
PC3	all	notissue	0.06854	s40	23.2441	705	93	Liver	6.53916
PC3	all	notissue	0.06854	s41	14.6482	2053	144	Liver	7.16993
PC3	all	notissue	0.06854	s42	22.2453	1753	232	Liver	7.85798
PC3	all	notissue	0.06854	s43	16.0942	1625	303	Liver	8.24317
PC3	all	notissue	0.06854	s44	6.99838	586	649	Liver	9.34207
PC3	all	notissue	0.06854	s45	-2.71538	561	654	Liver	9.35315
PC3	all	notissue	0.06854	s46	-21.3276	457	904	Liver	9.82018
PC3	all	notissue	0.06854	s47	-8.02459	465	904	Liver	9.82018
PC3	all	notissue	0.06854	s48	43.0638	841	2	Muscle	1
PC3	all	notissue	0.06854	s49	41.4075	842	2	Muscle	1
PC3	all	notissue	0.06854	s50	35.584	833	5	Muscle	2.32193
PC3	all	notissue	0.06854	s51	53.7834	2260	11	Muscle	3.45943
PC3	all	notissue	0.06854	s52	-22.3178	460502	20	Muscle	4.32193
PC3	all	notissue	0.06854	s53	-0.188941	2067	32	Muscle	5
PC3	all	notissue	0.06854	s54	-11.668	1979	61	Muscle	5.93074
PC3	all	notissue	0.06854	s55	-24.9791	700	93	Muscle	6.53916
PC3	all	notissue	0.06854	s56	-7.19238	705	93	Muscle	6.53916
PC3	all	notissue	0.06854	s57	-10.1401	2053	144	Muscle	7.16993
PC3	all	notissue	0.06854	s58	-15.9887	1753	232	Muscle	7.85798
PC3	all	notissue	0.06854	s59	-6.4675	1625	303	Muscle	8.24317
PC3	all	notissue	0.06854	s60	-1.24353	586	649	Muscle	9.34207
PC3	all	notissue	0.06854	s61	-6.72033	561	654	Muscle	9.35315
PC3	all	notissue	0.06854	s62	-60.1517	457	904	Muscle	9.82018
PC3	all	notissue	0.06854	s63	-6.78064	465	904	Muscle	9.82018
PC4	all	notissue	0.06255	s1	68.4647	841	2	Cortex	1
PC4	all	notissue	0.06255	s2	67.0034	842	2	Cortex	1
PC4	all	notissue	0.06255	s3	54.3222	833	5	Cortex	2.32193
PC4	all	notissue	0.06255	s4	13.9828	2260	11	Cortex	3.45943
PC4	all	notissue	0.06255	s5	-20.0088	460502	20	Cortex	4.32193
PC4	all	notissue	0.06255	s6	-20.6404	2067	32	Cortex	5
PC4	all	notissue	0.06255	s7	-6.60784	1979	61	Cortex	5.93074
PC4	all	notissue	0.06255	s8	-27.7138	700	93	Cortex	6.53916
PC4	all	notissue	0.06255	s9	-29.184	705	93	Cortex	6.53916
PC4	all	notissue	0.06255	s10	-15.0047	2053	144	Cortex	7.16993
PC4	all	notissue	0.06255	s11	-25.2453	1753	232	Cortex	7.85798
PC4	all	notissue	0.06255	s12	-13.7508	1625	303	Cortex	8.24317
PC4	all	notissue	0.06255	s13	-16.6348	586	649	Cortex	9.34207
PC4	all	notissue	0.06255	s14	-14.5518	561	654	Cortex	9.35315
PC4	all	notissue	0.06255	s15	-14.431	457	904	Cortex	9.82018
PC4	all	notissue	0.06255	s16	-34.543	841	2	Lung	1
PC4	all	notissue	0.06255	s17	-55.6277	842	2	Lung	1
PC4	all	notissue	0.06255	s18	-43.2035	833	5	Lung	2.32193
PC4	all	notissue	0.06255	s19	-14.8251	2260	11	Lung	3.45943
PC4	all	notissue	0.06255	s20	2.65158	460502	20	Lung	4.32193
PC4	all	notissue	0.06255	s21	-6.79247	2067	32	Lung	5
PC4	all	notissue	0.06255	s22	13.3515	1979	61	Lung	5.93074
PC4	all	notissue	0.06255	s23	22.1144	700	93	Lung	6.53916
PC4	all	notissue	0.06255	s24	4.24901	705	93	Lung	6.53916
PC4	all	notissue	0.06255	s25	11.1609	2053	144	Lung	7.16993
PC4	all	notissue	0.06255	s26	19.3113	1753	232	Lung	7.85798
PC4	all	notissue	0.06255	s27	38.0126	1625	303	Lung	8.24317
PC4	all	notissue	0.06255	s28	20.5825	586	649	Lung	9.34207
PC4	all	notissue	0.06255	s29	-8.38321	561	654	Lung	9.35315
PC4	all	notissue	0.06255	s30	1.5667	457	904	Lung	9.82018
PC4	all	notissue	0.06255	s31	30.3744	465	904	Lung	9.82018
PC4	all	notissue	0.06255	s32	-71.3302	841	2	Liver	1
PC4	all	notissue	0.06255	s33	-84.2404	842	2	Liver	1
PC4	all	notissue	0.06255	s34	-59.9022	833	5	Liver	2.32193
PC4	all	notissue	0.06255	s35	-43.4369	2260	11	Liver	3.45943
PC4	all	notissue	0.06255	s36	-4.60176	460502	20	Liver	4.32193
PC4	all	notissue	0.06255	s37	21.7572	2067	32	Liver	5
PC4	all	notissue	0.06255	s38	17.527	1979	61	Liver	5.93074
PC4	all	notissue	0.06255	s39	18.5201	700	93	Liver	6.53916
PC4	all	notissue	0.06255	s40	9.55864	705	93	Liver	6.53916
PC4	all	notissue	0.06255	s41	24.7092	2053	144	Liver	7.16993
PC4	all	notissue	0.06255	s42	15.5347	1753	232	Liver	7.85798
PC4	all	notissue	0.06255	s43	21.1437	1625	303	Liver	8.24317
PC4	all	notissue	0.06255	s44	33.6696	586	649	Liver	9.34207
PC4	all	notissue	0.06255	s45	40.6058	561	654	Liver	9.35315
PC4	all	notissue	0.06255	s46	28.3548	457	904	Liver	9.82018
PC4	all	notissue	0.06255	s47	32.1307	465	904	Liver	9.82018
PC4	all	notissue	0.06255	s48	17.7465	841	2	Muscle	1
PC4	all	notissue	0.06255	s49	19.167	842	2	Muscle	1
PC4	all	notissue	0.06255	s50	21.5739	833	5	Muscle	2.32193
PC4	all	notissue	0.06255	s51	41.4532	2260	11	Muscle	3.45943
PC4	all	notissue	0.06255	s52	36.1608	460502	20	Muscle	4.32193
PC4	all	notissue	0.06255	s53	5.81563	2067	32	Muscle	5
PC4	all	notissue	0.06255	s54	-15.1885	1979	61	Muscle	5.93074
PC4	all	notissue	0.06255	s55	-15.1983	700	93	Muscle	6.53916
PC4	all	notissue	0.06255	s56	-23.97	705	93	Muscle	6.53916
PC4	all	notissue	0.06255	s57	-19.082	2053	144	Muscle	7.16993
PC4	all	notissue	0.06255	s58	-20.0266	1753	232	Muscle	7.85798
PC4	all	notissue	0.06255	s59	-7.96822	1625	303	Muscle	8.24317
PC4	all	notissue	0.06255	s60	-15.8357	586	649	Muscle	9.34207
PC4	all	notissue	0.06255	s61	-13.5608	561	654	Muscle	9.35315
PC4	all	notissue	0.06255	s62	-6.50645	457	904	Muscle	9.82018
PC4	all	notissue	0.06255	s63	-4.58038	465	904	Muscle	9.82018
PC1	aging	raw	0.33799	s8	-126.96	700	93	Cortex	6.53916
PC1	aging	raw	0.33799	s9	-128.676	705	93	Cortex	6.53916
PC1	aging	raw	0.33799	s10	-126.533	2053	144	Cortex	7.16993
PC1	aging	raw	0.33799	s11	-130.278	1753	232	Cortex	7.85798
PC1	aging	raw	0.33799	s12	-122.918	1625	303	Cortex	8.24317
PC1	aging	raw	0.33799	s13	-123.307	586	649	Cortex	9.34207
PC1	aging	raw	0.33799	s14	-124.496	561	654	Cortex	9.35315
PC1	aging	raw	0.33799	s15	-122.989	457	904	Cortex	9.82018
PC1	aging	raw	0.33799	s23	27.5637	700	93	Lung	6.53916
PC1	aging	raw	0.33799	s24	19.3767	705	93	Lung	6.53916
PC1	aging	raw	0.33799	s25	23.9056	2053	144	Lung	7.16993
PC1	aging	raw	0.33799	s26	24.1615	1753	232	Lung	7.85798
PC1	aging	raw	0.33799	s27	29.2859	1625	303	Lung	8.24317
PC1	aging	raw	0.33799	s28	25.788	586	649	Lung	9.34207
PC1	aging	raw	0.33799	s29	35.0298	561	654	Lung	9.35315
PC1	aging	raw	0.33799	s30	43.5669	457	904	Lung	9.82018
PC1	aging	raw	0.33799	s31	35.677	465	904	Lung	9.82018
PC1	aging	raw	0.33799	s39	58.1803	700	93	Liver	6.53916
PC1	aging	raw	0.33799	s40	57.1384	705	93	Liver	6.53916
PC1	aging	raw	0.33799	s41	61.0976	2053	144	Liver	7.16993
PC1	aging	raw	0.33799	s42	59.5619	1753	232	Liver	7.85798
PC1	aging	raw	0.33799	s43	59.3132	1625	303	Liver	8.24317
PC1	aging	raw	0.33799	s44	62.0967	586	649	Liver	9.34207
PC1	aging	raw	0.33799	s45	63.9227	561	654	Liver	9.35315
PC1	aging	raw	0.33799	s46	65.4242	457	904	Liver	9.82018
PC1	aging	raw	0.33799	s47	65.5513	465	904	Liver	9.82018
PC1	aging	raw	0.33799	s55	24.8669	700	93	Muscle	6.53916
PC1	aging	raw	0.33799	s56	16.6686	705	93	Muscle	6.53916
PC1	aging	raw	0.33799	s57	21.7897	2053	144	Muscle	7.16993
PC1	aging	raw	0.33799	s58	21.4757	1753	232	Muscle	7.85798
PC1	aging	raw	0.33799	s59	19.9093	1625	303	Muscle	8.24317
PC1	aging	raw	0.33799	s60	13.9568	586	649	Muscle	9.34207
PC1	aging	raw	0.33799	s61	16.6758	561	654	Muscle	9.35315
PC1	aging	raw	0.33799	s62	35.7732	457	904	Muscle	9.82018
PC1	aging	raw	0.33799	s63	18.3995	465	904	Muscle	9.82018
PC2	aging	raw	0.24777	s8	4.54877	700	93	Cortex	6.53916
PC2	aging	raw	0.24777	s9	-1.32926	705	93	Cortex	6.53916
PC2	aging	raw	0.24777	s10	-4.74133	2053	144	Cortex	7.16993
PC2	aging	raw	0.24777	s11	-2.07959	1753	232	Cortex	7.85798
PC2	aging	raw	0.24777	s12	-3.84255	1625	303	Cortex	8.24317
PC2	aging	raw	0.24777	s13	-5.78976	586	649	Cortex	9.34207
PC2	aging	raw	0.24777	s14	-5.11032	561	654	Cortex	9.35315
PC2	aging	raw	0.24777	s15	-5.55413	457	904	Cortex	9.82018
PC2	aging	raw	0.24777	s23	-89.8792	700	93	Lung	6.53916
PC2	aging	raw	0.24777	s24	-85.0593	705	93	Lung	6.53916
PC2	aging	raw	0.24777	s25	-89.4911	2053	144	Lung	7.16993
PC2	aging	raw	0.24777	s26	-89.4223	1753	232	Lung	7.85798
PC2	aging	raw	0.24777	s27	-87.1407	1625	303	Lung	8.24317
PC2	aging	raw	0.24777	s28	-91.0184	586	649	Lung	9.34207
PC2	aging	raw	0.24777	s29	-70.4421	561	654	Lung	9.35315
PC2	aging	raw	0.24777	s30	-77.6714	457	904	Lung	9.82018
PC2	aging	raw	0.24777	s31	-94.0203	465	904	Lung	9.82018
PC2	aging	raw	0.24777	s39	4.87525	700	93	Liver	6.53916
PC2	aging	raw	0.24777	s40	20.7442	705	93	Liver	6.53916
PC2	aging	raw	0.24777	s41	11.5609	2053	144	Liver	7.16993
PC2	aging	raw	0.24777	s42	15.6822	1753	232	Liver	7.85798
PC2	aging	raw	0.24777	s43	18.3791	1625	303	Liver	8.24317
PC2	aging	raw	0.24777	s44	14.7793	586	649	Liver	9.34207
PC2	aging	raw	0.24777	s45	0.536299	561	654	Liver	9.35315
PC2	aging	raw	0.24777	s46	-5.9321	457	904	Liver	9.82018
PC2	aging	raw	0.24777	s47	-2.37603	465	904	Liver	9.82018
PC2	aging	raw	0.24777	s55	82.9354	700	93	Muscle	6.53916
PC2	aging	raw	0.24777	s56	94.1402	705	93	Muscle	6.53916
PC2	aging	raw	0.24777	s57	71.2351	2053	144	Muscle	7.16993
PC2	aging	raw	0.24777	s58	84.5436	1753	232	Muscle	7.85798
PC2	aging	raw	0.24777	s59	79.4371	1625	303	Muscle	8.24317
PC2	aging	raw	0.24777	s60	85.2021	586	649	Muscle	9.34207
PC2	aging	raw	0.24777	s61	86.8429	561	654	Muscle	9.35315
PC2	aging	raw	0.24777	s62	71.5085	457	904	Muscle	9.82018
PC2	aging	raw	0.24777	s63	63.9492	465	904	Muscle	9.82018
PC3	aging	raw	0.20394	s8	-24.1794	700	93	Cortex	6.53916
PC3	aging	raw	0.20394	s9	-22.1573	705	93	Cortex	6.53916
PC3	aging	raw	0.20394	s10	-22.2564	2053	144	Cortex	7.16993
PC3	aging	raw	0.20394	s11	-22.7697	1753	232	Cortex	7.85798
PC3	aging	raw	0.20394	s12	-19.9898	1625	303	Cortex	8.24317
PC3	aging	raw	0.20394	s13	-19.4406	586	649	Cortex	9.34207
PC3	aging	raw	0.20394	s14	-21.5712	561	654	Cortex	9.35315
PC3	aging	raw	0.20394	s15	-21.6118	457	904	Cortex	9.82018
PC3	aging	raw	0.20394	s23	47.2938	700	93	Lung	6.53916
PC3	aging	raw	0.20394	s24	43.9463	705	93	Lung	6.53916
PC3	aging	raw	0.20394	s25	47.1473	2053	144	Lung	7.16993
PC3	aging	raw	0.20394	s26	46.1468	1753	232	Lung	7.85798
PC3	aging	raw	0.20394	s27	45.4502	1625	303	Lung	8.24317
PC3	aging	raw	0.20394	s28	47.2243	586	649	Lung	9.34207
PC3	aging	raw	0.20394	s29	35.1655	561	654	Lung	9.35315
PC3	aging	raw	0.20394	s30	33.3204	457	904	Lung	9.82018
PC3	aging	raw	0.20394	s31	42.7575	465	904	Lung	9.82018
PC3	aging	raw	0.20394	s39	-77.3812	700	93	Liver	6.53916
PC3	aging	raw	0.20394	s40	-84.4411	705	93	Liver	6.53916
PC3	aging	raw	0.20394	s41	-80.1811	2053	144	Liver	7.16993
PC3	aging	raw	0.20394	s42	-84.6708	1753	232	Liver	7.85798
PC3	aging	raw	0.20394	s43	-80.7216	1625	303	Liver	8.24317
PC3	aging	raw	0.20394	s44	-81.3443	586	649	Liver	9.34207
PC3	aging	raw	0.20394	s45	-75.2256	561	654	Liver	9.35315
PC3	aging	raw	0.20394	s46	-72.5684	457	904	Liver	9.82018
PC3	aging	raw	0.20394	s47	-74.1417	465	904	Liver	9.82018
PC3	aging	raw	0.20394	s55	56.46	700	93	Muscle	6.53916
PC3	aging	raw	0.20394	s56	55.1648	705	93	Muscle	6.53916
PC3	aging	raw	0.20394	s57	55.2344	2053	144	Muscle	7.16993
PC3	aging	raw	0.20394	s58	57.4075	1753	232	Muscle	7.85798
PC3	aging	raw	0.20394	s59	50.7175	1625	303	Muscle	8.24317
PC3	aging	raw	0.20394	s60	55.6187	586	649	Muscle	9.34207
PC3	aging	raw	0.20394	s61	54.4653	561	654	Muscle	9.35315
PC3	aging	raw	0.20394	s62	55.7831	457	904	Muscle	9.82018
PC3	aging	raw	0.20394	s63	55.3486	465	904	Muscle	9.82018
PC4	aging	raw	0.03599	s8	-6.64854	700	93	Cortex	6.53916
PC4	aging	raw	0.03599	s9	-0.642968	705	93	Cortex	6.53916
PC4	aging	raw	0.03599	s10	-0.11267	2053	144	Cortex	7.16993
PC4	aging	raw	0.03599	s11	0.783052	1753	232	Cortex	7.85798
PC4	aging	raw	0.03599	s12	-1.4602	1625	303	Cortex	8.24317
PC4	aging	raw	0.03599	s13	-1.62247	586	649	Cortex	9.34207
PC4	aging	raw	0.03599	s14	-3.3491	561	654	Cortex	9.35315
PC4	aging	raw	0.03599	s15	-5.88441	457	904	Cortex	9.82018
PC4	aging	raw	0.03599	s23	19.8311	700	93	Lung	6.53916
PC4	aging	raw	0.03599	s24	33.3998	705	93	Lung	6.53916
PC4	aging	raw	0.03599	s25	21.3088	2053	144	Lung	7.16993
PC4	aging	raw	0.03599	s26	22.9876	1753	232	Lung	7.85798
PC4	aging	raw	0.03599	s27	29.2278	1625	303	Lung	8.24317
PC4	aging	raw	0.03599	s28	18.2733	586	649	Lung	9.34207
PC4	aging	raw	0.03599	s29	-42.1837	561	654	Lung	9.35315
PC4	aging	raw	0.03599	s30	-90.0004	457	904	Lung	9.82018
PC4	aging	raw	0.03599	s31	-12.0732	465	904	Lung	9.82018
PC4	aging	raw	0.03599	s39	7.505	700	93	Liver	6.53916
PC4	aging	raw	0.03599	s40	12.9649	705	93	Liver	6.53916
PC4	aging	raw	0.03599	s41	7.82701	2053	144	Liver	7.16993
PC4	aging	raw	0.03599	s42	9.46043	1753	232	Liver	7.85798
PC4	aging	raw	0.03599	s43	12.9292	1625	303	Liver	8.24317
PC4	aging	raw	0.03599	s44	7.72643	586	649	Liver	9.34207
PC4	aging	raw	0.03599	s45	-4.20408	561	654	Liver	9.35315
PC4	aging	raw	0.03599	s46	-23.7774	457	904	Liver	9.82018
PC4	aging	raw	0.03599	s47	-11.2578	465	904	Liver	9.82018
PC4	aging	raw	0.03599	s55	-10.2468	700	93	Muscle	6.53916
PC4	aging	raw	0.03599	s56	11.312	705	93	Muscle	6.53916
PC4	aging	raw	0.03599	s57	-11.0654	2053	144	Muscle	7.16993
PC4	aging	raw	0.03599	s58	-5.29456	1753	232	Muscle	7.85798
PC4	aging	raw	0.03599	s59	16.1653	1625	303	Muscle	8.24317
PC4	aging	raw	0.03599	s60	18.1947	586	649	Muscle	9.34207
PC4	aging	raw	0.03599	s61	17.8912	561	654	Muscle	9.35315
PC4	aging	raw	0.03599	s62	-44.5301	457	904	Muscle	9.82018
PC4	aging	raw	0.03599	s63	6.56601	465	904	Muscle	9.82018
PC1	development	raw	0.33152	s1	-115.74	841	2	Cortex	1
PC1	development	raw	0.33152	s2	-113.831	842	2	Cortex	1
PC1	development	raw	0.33152	s3	-118.891	833	5	Cortex	2.32193
PC1	development	raw	0.33152	s4	-120.945	2260	11	Cortex	3.45943
PC1	development	raw	0.33152	s5	-121.968	460502	20	Cortex	4.32193
PC1	development	raw	0.33152	s6	-118.349	2067	32	Cortex	5
PC1	development	raw	0.33152	s7	-113.853	1979	61	Cortex	5.93074
PC1	development	raw	0.33152	s16	23.7084	841	2	Lung	1
PC1	development	raw	0.33152	s17	19.0399	842	2	Lung	1
PC1	development	raw	0.33152	s18	21.9196	833	5	Lung	2.32193
PC1	development	raw	0.33152	s19	22.5343	2260	11	Lung	3.45943
PC1	development	raw	0.33152	s20	28.5183	460502	20	Lung	4.32193
PC1	development	raw	0.33152	s21	36.8249	2067	32	Lung	5
PC1	development	raw	0.33152	s22	32.4454	1979	61	Lung	5.93074
PC1	development	raw	0.33152	s32	63.8992	841	2	Liver	1
PC1	development	raw	0.33152	s33	61.5468	842	2	Liver	1
PC1	development	raw	0.33152	s34	63.7151	833	5	Liver	2.32193
PC1	development	raw	0.33152	s35	57.8536	2260	11	Liver	3.45943
PC1	development	raw	0.33152	s36	59.3128	460502	20	Liver	4.32193
PC1	development	raw	0.33152	s37	57.5049	2067	32	Liver	5
PC1	development	raw	0.33152	s38	54.3952	1979	61	Liver	5.93074
PC1	development	raw	0.33152	s48	28.0741	841	2	Muscle	1
PC1	development	raw	0.33152	s49	29.7227	842	2	Muscle	1
PC1	development	raw	0.33152	s50	31.7592	833	5	Muscle	2.32193
PC1	development	raw	0.33152	s51	35.1242	2260	11	Muscle	3.45943
PC1	development	raw	0.33152	s52	52.561	460502	20	Muscle	4.32193
PC1	development	raw	0.33152	s53	27.2671	2067	32	Muscle	5
PC1	development	raw	0.33152	s54	15.8495	1979	61	Muscle	5.93074
PC2	development	raw	0.19915	s1	9.16667	841	2	Cortex	1
PC2	development	raw	0.19915	s2	3.49588	842	2	Cortex	1
PC2	development	raw	0.19915	s3	8.28738	833	5	Cortex	2.32193
PC2	development	raw	0.19915	s4	18.0121	2260	11	Cortex	3.45943
PC2	development	raw	0.19915	s5	22.4802	460502	20	Cortex	4.32193
PC2	development	raw	0.19915	s6	22.0474	2067	32	Cortex	5
PC2	development	raw	0.19915	s7	20.0529	1979	61	Cortex	5.93074
PC2	development	raw	0.19915	s16	-68.4973	841	2	Lung	1
PC2	development	raw	0.19915	s17	-71.2069	842	2	Lung	1
PC2	development	raw	0.19915	s18	-69.9595	833	5	Lung	2.32193
PC2	development	raw	0.19915	s19	-73.2899	2260	11	Lung	3.45943
PC2	development	raw	0.19915	s20	-68.1851	460502	20	Lung	4.32193
PC2	development	raw	0.19915	s21	-62.9501	2067	32	Lung	5
PC2	development	raw	0.19915	s22	-61.4416	1979	61	Lung	5.93074
PC2	development	raw	0.19915	s32	53.5872	841	2	Liver	1
PC2	development	raw	0.19915	s33	56.0595	842	2	Liver	1
PC2	development	raw	0.19915	s34	53.9488	833	5	Liver	2.32193
PC2	development	raw	0.19915	s35	68.3328	2260	11	Liver	3.45943
PC2	development	raw	0.19915	s36	82.0591	460502	20	Liver	4.32193
PC2	development	raw	0.19915	s37	94.0054	2067	32	Liver	5
PC2	development	raw	0.19915	s38	96.4215	1979	61	Liver	5.93074
PC2	development	raw	0.19915	s48	-39.5852	841	2	Muscle	1
PC2	development	raw	0.19915	s49	-40.2402	842	2	Muscle	1
PC2	development	raw	0.19915	s50	-35.9949	833	5	Muscle	2.32193
PC2	development	raw	0.19915	s51	-45.589	2260	11	Muscle	3.45943
PC2	development	raw	0.19915	s52	-17.3557	460502	20	Muscle	4.32193
PC2	development	raw	0.19915	s53	10.9024	2067	32	Muscle	5
PC2	development	raw	0.19915	s54	35.4359	1979	61	Muscle	5.93074
PC3	development	raw	0.13671	s1	-5.37532	841	2	Cortex	1
PC3	development	raw	0.13671	s2	-7.96241	842	2	Cortex	1
PC3	development	raw	0.13671	s3	-6.68794	833	5	Cortex	2.32193
PC3	development	raw	0.13671	s4	-0.820433	2260	11	Cortex	3.45943
PC3	development	raw	0.13671	s5	-4.64618	460502	20	Cortex	4.32193
PC3	development	raw	0.13671	s6	-2.99692	2067	32	Cortex	5
PC3	development	raw	0.13671	s7	-0.612883	1979	61	Cortex	5.93074
PC3	development	raw	0.13671	s16	-37.6099	841	2	Lung	1
PC3	development	raw	0.13671	s17	-41.843	842	2	Lung	1
PC3	development	raw	0.13671	s18	-27.8323	833	5	Lung	2.32193
PC3	development	raw	0.13671	s19	-36.912	2260	11	Lung	3.45943
PC3	development	raw	0.13671	s20	-49.8538	460502	20	Lung	4.32193
PC3	development	raw	0.13671	s21	-41.5842	2067	32	Lung	5
PC3	development	raw	0.13671	s22	-53.7446	1979	61	Lung	5.93074
PC3	development	raw	0.13671	s32	-18.5767	841	2	Liver	1
PC3	development	raw	0.13671	s33	-25.3183	842	2	Liver	1
PC3	development	raw	0.13671	s34	-24.3678	833	5	Liver	2.32193
PC3	development	raw	0.13671	s35	-34.7815	2260	11	Liver	3.45943
PC3	development	raw	0.13671	s36	-29.7366	460502	20	Liver	4.32193
PC3	development	raw	0.13671	s37	-23.1694	2067	32	Liver	5
PC3	development	raw	0.13671	s38	-25.5113	1979	61	Liver	5.93074
PC3	development	raw	0.13671	s48	61.2521	841	2	Muscle	1
PC3	development	raw	0.13671	s49	59.5018	842	2	Muscle	1
PC3	development	raw	0.13671	s50	70.8637	833	5	Muscle	2.32193
PC3	development	raw	0.13671	s51	41.2835	2260	11	Muscle	3.45943
PC3	development	raw	0.13671	s52	73.2225	460502	20	Muscle	4.32193
PC3	development	raw	0.13671	s53	96.1327	2067	32	Muscle	5
PC3	development	raw	0.13671	s54	97.6872	1979	61	Muscle	5.93074
PC4	development	raw	0.09869	s1	32.9924	841	2	Cortex	1
PC4	development	raw	0.09869	s2	35.845	842	2	Cortex	1
PC4	development	raw	0.09869	s3	27.4805	833	5	Cortex	2.32193
PC4	development	raw	0.09869	s4	3.59012	2260	11	Cortex	3.45943
PC4	development	raw	0.09869	s5	-18.8637	460502	20	Cortex	4.32193
PC4	development	raw	0.09869	s6	-22.9156	2067	32	Cortex	5
PC4	development	raw	0.09869	s7	-21.1796	1979	61	Cortex	5.93074
PC4	development	raw	0.09869	s16	3.20721	841	2	Lung	1
PC4	development	raw	0.09869	s17	-0.395269	842	2	Lung	1
PC4	development	raw	0.09869	s18	7.24132	833	5	Lung	2.32193
PC4	development	raw	0.09869	s19	-13.5081	2260	11	Lung	3.45943
PC4	development	raw	0.09869	s20	-41.1683	460502	20	Lung	4.32193
PC4	development	raw	0.09869	s21	-41.7874	2067	32	Lung	5
PC4	development	raw	0.09869	s22	-55.3068	1979	61	Lung	5.93074
PC4	development	raw	0.09869	s32	52.3676	841	2	Liver	1
PC4	development	raw	0.09869	s33	46.0706	842	2	Liver	1
PC4	development	raw	0.09869	s34	43.2719	833	5	Liver	2.32193
PC4	development	raw	0.09869	s35	12.7558	2260	11	Liver	3.45943
PC4	development	raw	0.09869	s36	-9.63473	460502	20	Liver	4.32193
PC4	development	raw	0.09869	s37	-24.8772	2067	32	Liver	5
PC4	development	raw	0.09869	s38	-34.0633	1979	61	Liver	5.93074
PC4	development	raw	0.09869	s48	40.7678	841	2	Muscle	1
PC4	development	raw	0.09869	s49	44.5588	842	2	Muscle	1
PC4	development	raw	0.09869	s50	33.9444	833	5	Muscle	2.32193
PC4	development	raw	0.09869	s51	29.5704	2260	11	Muscle	3.45943
PC4	development	raw	0.09869	s52	30.4375	460502	20	Muscle	4.32193
PC4	development	raw	0.09869	s53	-61.7063	2067	32	Muscle	5
PC4	development	raw	0.09869	s54	-98.6949	1979	61	Muscle	5.93074
PC1	development	notissue	0.22541	s1	-61.36	841	2	Cortex	1
PC1	development	notissue	0.22541	s2	-73.384	842	2	Cortex	1
PC1	development	notissue	0.22541	s3	-50.8187	833	5	Cortex	2.32193
PC1	development	notissue	0.22541	s4	6.90281	2260	11	Cortex	3.45943
PC1	development	notissue	0.22541	s5	53.9609	460502	20	Cortex	4.32193
PC1	development	notissue	0.22541	s6	62.9383	2067	32	Cortex	5
PC1	development	notissue	0.22541	s7	61.7608	1979	61	Cortex	5.93074
PC1	development	notissue	0.22541	s16	-51.689	841	2	Lung	1
PC1	development	notissue	0.22541	s17	-54.3265	842	2	Lung	1
PC1	development	notissue	0.22541	s18	-59.5222	833	5	Lung	2.32193
PC1	development	notissue	0.22541	s19	-23.29	2260	11	Lung	3.45943
PC1	development	notissue	0.22541	s20	38.3535	460502	20	Lung	4.32193
PC1	development	notissue	0.22541	s21	64.1878	2067	32	Lung	5
PC1	development	notissue	0.22541	s22	86.2865	1979	61	Lung	5.93074
PC1	development	notissue	0.22541	s32	-59.7587	841	2	Liver	1
PC1	development	notissue	0.22541	s33	-56.1897	842	2	Liver	1
PC1	development	notissue	0.22541	s34	-47.8517	833	5	Liver	2.32193
PC1	development	notissue	0.22541	s35	-8.00527	2260	11	Liver	3.45943
PC1	development	notissue	0.22541	s36	34.9248	460502	20	Liver	4.32193
PC1	development	notissue	0.22541	s37	64.5931	2067	32	Liver	5
PC1	development	notissue	0.22541	s38	72.2875	1979	61	Liver	5.93074
PC1	development	notissue	0.22541	s48	-55.082	841	2	Muscle	1
PC1	development	notissue	0.22541	s49	-57.6474	842	2	Muscle	1
PC1	development	notissue	0.22541	s50	-38.686	833	5	Muscle	2.32193
PC1	development	notissue	0.22541	s51	-33.3136	2260	11	Muscle	3.45943
PC1	development	notissue	0.22541	s52	-1.2932	460502	20	Muscle	4.32193
PC1	development	notissue	0.22541	s53	77.3052	2067	32	Muscle	5
PC1	development	notissue	0.22541	s54	108.717	1979	61	Muscle	5.93074
PC2	development	notissue	0.1327	s1	83.5097	841	2	Cortex	1
PC2	development	notissue	0.1327	s2	49.7528	842	2	Cortex	1
PC2	development	notissue	0.1327	s3	43.3481	833	5	Cortex	2.32193
PC2	development	notissue	0.1327	s4	-20.7654	2260	11	Cortex	3.45943
PC2	development	notissue	0.1327	s5	-46.3563	460502	20	Cortex	4.32193
PC2	development	notissue	0.1327	s6	-47.7383	2067	32	Cortex	5
PC2	development	notissue	0.1327	s7	-61.7506	1979	61	Cortex	5.93074
PC2	development	notissue	0.1327	s16	17.2976	841	2	Lung	1
PC2	development	notissue	0.1327	s17	41.2016	842	2	Lung	1
PC2	development	notissue	0.1327	s18	15.1236	833	5	Lung	2.32193
PC2	development	notissue	0.1327	s19	4.16909	2260	11	Lung	3.45943
PC2	development	notissue	0.1327	s20	-4.41539	460502	20	Lung	4.32193
PC2	development	notissue	0.1327	s21	-51.8614	2067	32	Lung	5
PC2	development	notissue	0.1327	s22	-21.515	1979	61	Lung	5.93074
PC2	development	notissue	0.1327	s32	-49.9368	841	2	Liver	1
PC2	development	notissue	0.1327	s33	-25.4325	842	2	Liver	1
PC2	development	notissue	0.1327	s34	-53.4037	833	5	Liver	2.32193
PC2	development	notissue	0.1327	s35	-0.072429	2260	11	Liver	3.45943
PC2	development	notissue	0.1327	s36	19.2317	460502	20	Liver	4.32193
PC2	development	notissue	0.1327	s37	43.6499	2067	32	Liver	5
PC2	development	notissue	0.1327	s38	65.9638	1979	61	Liver	5.93074
PC2	development	notissue	0.1327	s48	-4.35327	841	2	Muscle	1
PC2	development	notissue	0.1327	s49	-6.65561	842	2	Muscle	1
PC2	development	notissue	0.1327	s50	-18.8127	833	5	Muscle	2.32193
PC2	development	notissue	0.1327	s51	-21.3593	2260	11	Muscle	3.45943
PC2	development	notissue	0.1327	s52	-72.656	460502	20	Muscle	4.32193
PC2	development	notissue	0.1327	s53	29.3869	2067	32	Muscle	5
PC2	development	notissue	0.1327	s54	94.45	1979	61	Muscle	5.93074
PC3	development	notissue	0.08169	s1	-45.4312	841	2	Cortex	1
PC3	development	notissue	0.08169	s2	-43.7689	842	2	Cortex	1
PC3	development	notissue	0.08169	s3	-28.5124	833	5	Cortex	2.32193
PC3	development	notissue	0.08169	s4	19.0404	2260	11	Cortex	3.45943
PC3	development	notissue	0.08169	s5	41.7672	460502	20	Cortex	4.32193
PC3	development	notissue	0.08169	s6	35.9165	2067	32	Cortex	5
PC3	development	notissue	0.08169	s7	20.9885	1979	61	Cortex	5.93074
PC3	development	notissue	0.08169	s16	28.7129	841	2	Lung	1
PC3	development	notissue	0.08169	s17	54.7572	842	2	Lung	1
PC3	development	notissue	0.08169	s18	47.4615	833	5	Lung	2.32193
PC3	development	notissue	0.08169	s19	11.7278	2260	11	Lung	3.45943
PC3	development	notissue	0.08169	s20	-42.422	460502	20	Lung	4.32193
PC3	development	notissue	0.08169	s21	-37.4828	2067	32	Lung	5
PC3	development	notissue	0.08169	s22	-62.7546	1979	61	Lung	5.93074
PC3	development	notissue	0.08169	s32	4.76161	841	2	Liver	1
PC3	development	notissue	0.08169	s33	18.5439	842	2	Liver	1
PC3	development	notissue	0.08169	s34	9.08513	833	5	Liver	2.32193
PC3	development	notissue	0.08169	s35	33.1292	2260	11	Liver	3.45943
PC3	development	notissue	0.08169	s36	-2.18252	460502	20	Liver	4.32193
PC3	development	notissue	0.08169	s37	-29.7491	2067	32	Liver	5
PC3	development	notissue	0.08169	s38	-33.5882	1979	61	Liver	5.93074
PC3	development	notissue	0.08169	s48	0.017014	841	2	Muscle	1
PC3	development	notissue	0.08169	s49	-1.61073	842	2	Muscle	1
PC3	development	notissue	0.08169	s50	-1.16821	833	5	Muscle	2.32193
PC3	development	notissue	0.08169	s51	-41.1987	2260	11	Muscle	3.45943
PC3	development	notissue	0.08169	s52	-42.5883	460502	20	Muscle	4.32193
PC3	development	notissue	0.08169	s53	28.8864	2067	32	Muscle	5
PC3	development	notissue	0.08169	s54	57.6625	1979	61	Muscle	5.93074
PC4	development	notissue	0.0759	s1	31.7273	841	2	Cortex	1
PC4	development	notissue	0.0759	s2	22.0619	842	2	Cortex	1
PC4	development	notissue	0.0759	s3	14.4058	833	5	Cortex	2.32193
PC4	development	notissue	0.0759	s4	-7.07235	2260	11	Cortex	3.45943
PC4	development	notissue	0.0759	s5	-23.6586	460502	20	Cortex	4.32193
PC4	development	notissue	0.0759	s6	-19.2336	2067	32	Cortex	5
PC4	development	notissue	0.0759	s7	-18.2303	1979	61	Cortex	5.93074
PC4	development	notissue	0.0759	s16	-8.85661	841	2	Lung	1
PC4	development	notissue	0.0759	s17	-9.96803	842	2	Lung	1
PC4	development	notissue	0.0759	s18	-5.57429	833	5	Lung	2.32193
PC4	development	notissue	0.0759	s19	-31.2069	2260	11	Lung	3.45943
PC4	development	notissue	0.0759	s20	-3.07779	460502	20	Lung	4.32193
PC4	development	notissue	0.0759	s21	43.6404	2067	32	Lung	5
PC4	development	notissue	0.0759	s22	15.0432	1979	61	Lung	5.93074
PC4	development	notissue	0.0759	s32	57.242	841	2	Liver	1
PC4	development	notissue	0.0759	s33	55.5262	842	2	Liver	1
PC4	development	notissue	0.0759	s34	26.6875	833	5	Liver	2.32193
PC4	development	notissue	0.0759	s35	-27.5651	2260	11	Liver	3.45943
PC4	development	notissue	0.0759	s36	-31.8711	460502	20	Liver	4.32193
PC4	development	notissue	0.0759	s37	-40.0789	2067	32	Liver	5
PC4	development	notissue	0.0759	s38	-39.9407	1979	61	Liver	5.93074
PC4	development	notissue	0.0759	s48	-31.3551	841	2	Muscle	1
PC4	development	notissue	0.0759	s49	-30.543	842	2	Muscle	1
PC4	development	notissue	0.0759	s50	-20.8399	833	5	Muscle	2.32193
PC4	development	notissue	0.0759	s51	-57.1262	2260	11	Muscle	3.45943
PC4	development	notissue	0.0759	s52	36.0519	460502	20	Muscle	4.32193
PC4	development	notissue	0.0759	s53	42.3332	2067	32	Muscle	5
PC4	development	notissue	0.0759	s54	61.4791	1979	61	Muscle	5.93074

## Sheet: sdata2
.	Df	Sum Sq	Mean Sq	F value	Pr(>F)
PC1
tissue	3	286664	95554.6	2235.8	1.08532e-60
Residuals	59	2521.57	42.7384
PC2
tissue1	3	151548	50516.1	82.4222	4.44877e-21
Residuals1	59	36160.8	612.894
PC3
tissue2	3	146212	48737.2	331.528	7.11427e-37
Residuals2	59	8673.47	147.008
PC4
tissue3	3	11598.9	3866.29	3.64508	0.0176126
Residuals3	59	62580.7	1060.69

## Sheet: sdata3
PCA period	type	PC	tissue	age period	rho	p
aging	notissue	PC1	Cortex	Aging	-0.886243	0.00337334
aging	notissue	PC1	Liver	Aging	-0.747926	0.0204819
aging	notissue	PC1	Lung	Aging	-0.907595	0.000720766
aging	notissue	PC1	Muscle	Aging	-0.420183	0.260159
aging	notissue	PC2	Cortex	Aging	0.634742	0.0908904
aging	notissue	PC2	Liver	Aging	0.218495	0.572215
aging	notissue	PC2	Lung	Aging	-0.0756329	0.846654
aging	notissue	PC2	Muscle	Aging	0.310935	0.415407
aging	notissue	PC3	Cortex	Aging	0.179644	0.670344
aging	notissue	PC3	Liver	Aging	-0.411779	0.270805
aging	notissue	PC3	Lung	Aging	0.932806	0.000242368
aging	notissue	PC3	Muscle	Aging	0.15967	0.681556
aging	notissue	PC4	Cortex	Aging	-0.299407	0.471261
aging	notissue	PC4	Liver	Aging	0.310935	0.415407
aging	notissue	PC4	Lung	Aging	0.411779	0.270805
aging	notissue	PC4	Muscle	Aging	0.336146	0.376456
aging	raw	PC1	Cortex	Aging	0.682647	0.0620927
aging	raw	PC1	Liver	Aging	0.924402	0.000363041
aging	raw	PC1	Lung	Aging	0.831962	0.00541121
aging	raw	PC1	Muscle	Aging	-0.0420183	0.914527
aging	raw	PC2	Cortex	Aging	-0.850315	0.00747141
aging	raw	PC2	Liver	Aging	-0.672293	0.0472749
aging	raw	PC2	Lung	Aging	0.0588256	0.880507
aging	raw	PC2	Muscle	Aging	-0.369761	0.327361
aging	raw	PC3	Cortex	Aging	0.658694	0.0756897
aging	raw	PC3	Liver	Aging	0.630274	0.0688295
aging	raw	PC3	Lung	Aging	-0.663889	0.0511799
aging	raw	PC3	Muscle	Aging	-0.0588256	0.880507
aging	raw	PC4	Cortex	Aging	-0.299407	0.471261
aging	raw	PC4	Liver	Aging	-0.722715	0.0278302
aging	raw	PC4	Lung	Aging	-0.773137	0.0145489
aging	raw	PC4	Muscle	Aging	0.109248	0.779644
all	notissue	PC1	Cortex	Aging	0.323359	0.434639
all	notissue	PC1	Cortex	Dev	0.954994	0.000805535
all	notissue	PC1	Liver	Aging	-0.495816	0.174652
all	notissue	PC1	Liver	Dev	0.991031	1.45613e-05
all	notissue	PC1	Lung	Aging	-0.34455	0.363871
all	notissue	PC1	Lung	Dev	0.882919	0.00845034
all	notissue	PC1	Muscle	Aging	-0.0756329	0.846654
all	notissue	PC1	Muscle	Dev	0.954994	0.000805535
all	notissue	PC2	Cortex	Aging	-0.886243	0.00337334
all	notissue	PC2	Cortex	Dev	-0.991031	1.45613e-05
all	notissue	PC2	Liver	Aging	-0.672293	0.0472749
all	notissue	PC2	Liver	Dev	0.882919	0.00845034
all	notissue	PC2	Lung	Aging	-0.613467	0.0789152
all	notissue	PC2	Lung	Dev	-0.900937	0.00562059
all	notissue	PC2	Muscle	Aging	-0.546238	0.128114
all	notissue	PC2	Muscle	Dev	0.306319	0.504027
all	notissue	PC3	Cortex	Aging	-0.526956	0.179629
all	notissue	PC3	Cortex	Dev	0.882919	0.00845034
all	notissue	PC3	Liver	Aging	-0.94121	0.000153115
all	notissue	PC3	Liver	Dev	0.630656	0.128888
all	notissue	PC3	Lung	Aging	-0.882384	0.00163468
all	notissue	PC3	Lung	Dev	-0.072075	0.877959
all	notissue	PC3	Muscle	Aging	0.201688	0.602799
all	notissue	PC3	Muscle	Dev	-0.666694	0.10192
all	notissue	PC4	Cortex	Aging	0.754505	0.0305128
all	notissue	PC4	Cortex	Dev	-0.882919	0.00845034
all	notissue	PC4	Liver	Aging	0.764733	0.0163777
all	notissue	PC4	Liver	Dev	0.954994	0.000805535
all	notissue	PC4	Lung	Aging	-0.0840366	0.829806
all	notissue	PC4	Lung	Dev	0.900937	0.00562059
all	notissue	PC4	Muscle	Aging	0.78154	0.012862
all	notissue	PC4	Muscle	Dev	-0.342356	0.452251
all	raw	PC1	Cortex	Aging	0.778457	0.0228673
all	raw	PC1	Cortex	Dev	-0.666694	0.10192
all	raw	PC1	Liver	Aging	0.94121	0.000153115
all	raw	PC1	Liver	Dev	0.756787	0.0489051
all	raw	PC1	Lung	Aging	0.831962	0.00541121
all	raw	PC1	Lung	Dev	0.810844	0.0269163
all	raw	PC1	Muscle	Aging	-0.0420183	0.914527
all	raw	PC1	Muscle	Dev	0.324337	0.477885
all	raw	PC2	Cortex	Aging	0.550908	0.157018
all	raw	PC2	Cortex	Dev	-0.828862	0.0211735
all	raw	PC2	Liver	Aging	0.672293	0.0472749
all	raw	PC2	Liver	Dev	-0.882919	0.00845034
all	raw	PC2	Lung	Aging	-0.546238	0.128114
all	raw	PC2	Lung	Dev	0.594619	0.15909
all	raw	PC2	Muscle	Aging	0.310935	0.415407
all	raw	PC2	Muscle	Dev	-0.774806	0.0407695
all	raw	PC3	Cortex	Aging	0.143715	0.734221
all	raw	PC3	Cortex	Dev	-0.666694	0.10192
all	raw	PC3	Liver	Aging	0.378165	0.315613
all	raw	PC3	Liver	Dev	-0.882919	0.00845034
all	raw	PC3	Lung	Aging	-0.59666	0.0898701
all	raw	PC3	Lung	Dev	-0.378394	0.402602
all	raw	PC3	Muscle	Aging	-0.563045	0.114456
all	raw	PC3	Muscle	Dev	0.450469	0.310429
all	raw	PC4	Cortex	Aging	0.0239525	0.955106
all	raw	PC4	Cortex	Dev	-0.954994	0.000805535
all	raw	PC4	Liver	Aging	0.798348	0.00989211
all	raw	PC4	Liver	Dev	-0.991031	1.45613e-05
all	raw	PC4	Lung	Aging	0.882384	0.00163468
all	raw	PC4	Lung	Dev	-0.882919	0.00845034
all	raw	PC4	Muscle	Aging	0.134459	0.730177
all	raw	PC4	Muscle	Dev	-0.954994	0.000805535
development	notissue	PC1	Cortex	Dev	0.954994	0.000805535
development	notissue	PC1	Liver	Dev	0.991031	1.45613e-05
development	notissue	PC1	Lung	Dev	0.882919	0.00845034
development	notissue	PC1	Muscle	Dev	0.991031	1.45613e-05
development	notissue	PC2	Cortex	Dev	-0.991031	1.45613e-05
development	notissue	PC2	Liver	Dev	0.882919	0.00845034
development	notissue	PC2	Lung	Dev	-0.954994	0.000805535
development	notissue	PC2	Muscle	Dev	0.306319	0.504027
development	notissue	PC3	Cortex	Dev	0.846881	0.0161971
development	notissue	PC3	Liver	Dev	-0.72075	0.067635
development	notissue	PC3	Lung	Dev	-0.900937	0.00562059
development	notissue	PC3	Muscle	Dev	0.360375	0.427149
development	notissue	PC4	Cortex	Dev	-0.846881	0.0161971
development	notissue	PC4	Liver	Dev	-0.954994	0.000805535
development	notissue	PC4	Lung	Dev	0.738769	0.0578585
development	notissue	PC4	Muscle	Dev	0.774806	0.0407695
development	raw	PC1	Cortex	Dev	-0.216225	0.641446
development	raw	PC1	Liver	Dev	-0.900937	0.00562059
development	raw	PC1	Lung	Dev	0.810844	0.0269163
development	raw	PC1	Muscle	Dev	-0.306319	0.504027
development	raw	PC2	Cortex	Dev	0.792825	0.0334435
development	raw	PC2	Liver	Dev	0.936975	0.00185103
development	raw	PC2	Lung	Dev	0.72075	0.067635
development	raw	PC2	Muscle	Dev	0.774806	0.0407695
development	raw	PC3	Cortex	Dev	0.828862	0.0211735
development	raw	PC3	Liver	Dev	-0.342356	0.452251
development	raw	PC3	Lung	Dev	-0.504525	0.248203
development	raw	PC3	Muscle	Dev	0.774806	0.0407695
development	raw	PC4	Cortex	Dev	-0.954994	0.000805535
development	raw	PC4	Liver	Dev	-0.991031	1.45613e-05
development	raw	PC4	Lung	Dev	-0.882919	0.00845034
development	raw	PC4	Muscle	Dev	-0.954994	0.000805535

## Sheet: sdata4
ind_id	mdist	age
841	133.029	2
2053	171.623	144
1753	177.965	232
1625	170.171	303
586	174.307	649
561	165.934	654
457	163.426	904
842	132.734	2
833	135.124	5
2260	144.908	11
460502	163.297	20
2067	166.725	32
1979	174.614	61
700	174.333	93
705	178.502	93
465	151.726	904

## Sheet: sdata5
ind_id	mdist	age
841	149.177	2
842	150.007	2
833	151.287	5
2260	153.648	11
460502	172.757	20
2067	170.829	32
1979	175.403	61

## Sheet: sdata6
ind_id	mdist	age
2053	175.73	144
1753	182.731	232
1625	174.699	303
586	178.896	649
561	173.672	654
457	176.272	904
700	178.965	93
705	181.597	93
465	155.328	904

## Sheet: sdata7
dev_Cortex	dev_Liver	dev_Lung	dev_Muscle	age_Cortex	age_Liver	age_Lung	age_Muscle
1	0.170434	0.378727	0.271759	0.206807	0.0553606	0.0357021	0.0557347
0.170434	1	0.278677	0.361283	-0.0525291	-0.235272	-0.155169	-0.100472
0.378727	0.278677	1	0.392573	0.183471	0.107105	-0.019038	0.107149
0.271759	0.361283	0.392573	1	0.00149975	-0.0979775	0.0476977	-0.128877
0.206807	-0.0525291	0.183471	0.00149975	1	0.274004	0.227151	0.248153
0.0553606	-0.235272	0.107105	-0.0979775	0.274004	1	0.326724	0.252938
0.0357021	-0.155169	-0.019038	0.0476977	0.227151	0.326724	1	0.233791
0.0557347	-0.100472	0.107149	-0.128877	0.248153	0.252938	0.233791	1

## Sheet: sdata8
Tissue A	Tissue B	Period	rho	permutation p-value	eFPP
Cortex	Lung	Development	0.379	0	0.294
Cortex	Liver	Development	0.17	0.021	0.405
Cortex	Muscle	Development	0.272	0.01	0.277
Lung	Liver	Development	0.279	0.01	0.579
Lung	Muscle	Development	0.393	0.016	0.383
Liver	Muscle	Development	0.361	0.034	0.414
Cortex	Lung	Ageing	0.227	0.055	0.343
Cortex	Liver	Ageing	0.274	0.003	0.189
Cortex	Muscle	Ageing	0.248	0.003	0.156
Lung	Liver	Ageing	0.327	0.019	0.363
Lung	Muscle	Ageing	0.234	0.175	0.653
Liver	Muscle	Ageing	0.253	0.029	0.354

## Sheet: sdata9
tissue	period	direction	n
Cortex	Ageing	Up	35
Cortex	Development	Up	2785
Liver	Ageing	Up	68
Liver	Development	Up	2417
Lung	Ageing	Up	939
Lung	Development	Up	1576
Muscle	Ageing	Up
Muscle	Development	Up	897
Cortex	Ageing	Down	33
Cortex	Development	Down	3366
Liver	Ageing	Down	88
Liver	Development	Down	2054
Lung	Ageing	Down	1380
Lung	Development	Down	1820
Muscle	Ageing	Down	2
Muscle	Development	Down	1044

[truncated: 15 more sheets: sdata10, sdata11, sdata12, sdata13, sdata14, sdata15, sdata16, sdata17, sdata18, sdata19, sdata20, sdata21, sdata22, sdata23, sdata24]
