# Supplementary material for: Inter-tissue convergence of gene expression during ageing suggests age-related loss of tissue and cellular identity
Source: eLife journal article supplement (doi:10.7554/elife.68048), 2022-01-31
Supplement: supp [file elife-68048-supp-v1.zip › elife_poa_e68048_Figure_2_source_data_1.xlsx]

## Sheet: sdata0
sheet		relevant figure
sdata1	mean cov change	f2a
sdata2	top dico gene cov	f2b
sdata3	top dico gene expression	f2c
sdata4	co/di count	f2d
sdata5	co/di ratios	f2e
sdata6	Age-related change in CoV summarised across genes using median	fs1
sdata7	Clustering of DiCo genes by expression variations (CoV) among tissues	fs2
sdata8	Clustering of DiCo genes by expression levels in tissues	fs3
sdata9	Number of genes with divergence and convergence tendencies in development and ageing	fs4
sdata10	Pairwise tissue expression correlations	fs5
sdata11	Summary of pairwise expression correlations among tissues	fs6a
sdata12	Summary of pairwise expression correlations among tissues (scaled)	fs6b
sdata13	CoV and pairwise correlation analysis of Jonker dataset: mean/median cov	fs7ab
sdata14	CoV and pairwise correlation analysis of Jonker dataset: pairwise correlations	fs7c
sdata15	PCA of GTEx dataset covering cortex, liver, lung, and muscle tissues: pca data	fs8abd-g
sdata16	PCA of GTEx dataset covering cortex, liver, lung, and muscle tissues: euclidean dist data	fs8c
sdata17	CoV and pairwise correlation analysis of GTEx dataset covering cortex, liver, lung, and muscle tissues: mean/median cov	fs9ab
sdata18	CoV and pairwise correlation analysis of GTEx dataset covering cortex, liver, lung, and muscle tissues: pairwise correlations	fs9c
sdata19	PCA of GTEx dataset with ten tissues: pca data	fs10abd-g
sdata20	PCA of GTEx dataset with ten tissues: euclidean dist data	fs10c
sdata21	CoV and pairwise correlation analysis of GTEx dataset with ten tissues: mean/median cov	fs11ab
sdata22	CoV and pairwise correlation analysis of GTEx dataset with ten tissues: pairwise correlations	fs11c
sdata23	Permutation test result for the proportion of DiCo genes	fs12
sdata24	Clustering of tissues by the presence of samples from the same individuals	fs13
sdata25	Reproducing Figure 2 results with VST normalisation: mean cov change	fs14a
sdata26	Reproducing Figure 2 results with VST normalisation: top dico gene cov change	fs14b
sdata27	Reproducing Figure 2 results with VST normalisation: top dico gene expression change	fs14c
sdata28	Reproducing Figure 2 results with VST normalisation: co, di count	fs14d
sdata29	Reproducing Figure 2 results with VST normalisation: co/di props	fs14e
sdata30	Effect of heteroscedasticity to DiCo pattern: heterogeneity test	fs15a
sdata31	Effect of heteroscedasticity to DiCo pattern: ncvtest	fs15b
sdata32	Sex effect on CoV analysis using GTEx: mean median cov change	fs16ab
sdata33	Sex effect on CoV analysis using GTEx: pairwise correlations	fs16cd
sdata34	PCA of Schaum dataset covering cortex, liver, lung, and muscle tissues: pca data	fs17abd-g
sdata35	PCA of Schaum dataset covering cortex, liver, lung, and muscle tissues: euclidean dist data	fs17c
sdata36	CoV and pairwise correlation analysis of Schaum dataset covering cortex, liver, lung, and muscle tissues: mean/median cov	fs18ab
sdata37	CoV and pairwise correlation analysis of Schaum dataset covering cortex, liver, lung, and muscle tissues: pairwise correlations	fs18c
sdata38	PCA of Schaum dataset with eight tissues: pca data	fs19abd-g
sdata39	PCA of Schaum dataset with eight tissues: euclidean dist data	fs19c
sdata40	CoV and pairwise correlation analysis of Schaum dataset with eight tissues: mean/median cov	fs20ab
sdata41	CoV and pairwise correlation analysis of Schaum dataset covering cortex, liver, lung, and muscle tissues: pairwise correlations	fs20c
sdata42	Age-related cov change values of all genes

## Sheet: sdata1
ind_id	age	meanCoV	medianCoV	period
457	904	0.514649	0.345614	aging
561	654	0.512232	0.351972	aging
586	649	0.517471	0.353608	aging
700	93	0.515543	0.352144	aging
705	93	0.519331	0.356034	aging
833	5	0.484346	0.317291	development
841	2	0.486834	0.320783	development
842	2	0.486034	0.317013	development
1625	303	0.511878	0.352603	aging
1753	232	0.522467	0.355686	aging
1979	61	0.51565	0.354385	development
2053	144	0.515363	0.346036	aging
2067	32	0.510488	0.344026	development
2260	11	0.490858	0.322251	development
460502	20	0.517723	0.355796	development

## Sheet: sdata2
gene_id	ind_id	CoV	age	log2age	period
ENSMUSG00000027435	841	0.463892	2	1	development
ENSMUSG00000027435	842	0.4649	2	1	development
ENSMUSG00000027435	833	0.490419	5	2.32193	development
ENSMUSG00000027435	2260	0.523053	11	3.45943	development
ENSMUSG00000027435	460502	0.699446	20	4.32193	development
ENSMUSG00000027435	2067	0.752632	32	5	development
ENSMUSG00000027435	1979	0.837706	61	5.93074	development
ENSMUSG00000027435	700	0.903399	93	6.53916	aging
ENSMUSG00000027435	705	0.929955	93	6.53916	aging
ENSMUSG00000027435	2053	0.886061	144	7.16993	aging
ENSMUSG00000027435	1753	0.900955	232	7.85798	aging
ENSMUSG00000027435	1625	0.824709	303	8.24317	aging
ENSMUSG00000027435	586	0.816715	649	9.34207	aging
ENSMUSG00000027435	561	0.730836	654	9.35315	aging
ENSMUSG00000027435	457	0.793998	904	9.82018	aging

## Sheet: sdata3
gene_id	development	aging	rev	sample_id	expression	ind_id	age	tissue	log2age
ENSMUSG00000027435	0.991031	-0.946125	-0.937639	s1	2.068	841	2	Cortex	1
ENSMUSG00000027435	0.991031	-0.946125	-0.937639	s2	2.29113	842	2	Cortex	1
ENSMUSG00000027435	0.991031	-0.946125	-0.937639	s3	2.12354	833	5	Cortex	2.32193
ENSMUSG00000027435	0.991031	-0.946125	-0.937639	s4	1.95749	2260	11	Cortex	3.45943
ENSMUSG00000027435	0.991031	-0.946125	-0.937639	s5	1.2938	460502	20	Cortex	4.32193
ENSMUSG00000027435	0.991031	-0.946125	-0.937639	s6	1.05163	2067	32	Cortex	5
ENSMUSG00000027435	0.991031	-0.946125	-0.937639	s7	0.817169	1979	61	Cortex	5.93074
ENSMUSG00000027435	0.991031	-0.946125	-0.937639	s8	0.592395	700	93	Cortex	6.53916
ENSMUSG00000027435	0.991031	-0.946125	-0.937639	s9	0.718015	705	93	Cortex	6.53916
ENSMUSG00000027435	0.991031	-0.946125	-0.937639	s10	0.866544	2053	144	Cortex	7.16993
ENSMUSG00000027435	0.991031	-0.946125	-0.937639	s11	0.611534	1753	232	Cortex	7.85798
ENSMUSG00000027435	0.991031	-0.946125	-0.937639	s12	0.643561	1625	303	Cortex	8.24317
ENSMUSG00000027435	0.991031	-0.946125	-0.937639	s13	0.650403	586	649	Cortex	9.34207
ENSMUSG00000027435	0.991031	-0.946125	-0.937639	s14	0.547612	561	654	Cortex	9.35315
ENSMUSG00000027435	0.991031	-0.946125	-0.937639	s15	0.570619	457	904	Cortex	9.82018
ENSMUSG00000027435	0.991031	-0.946125	-0.937639	s16	5.59718	841	2	Lung	1
ENSMUSG00000027435	0.991031	-0.946125	-0.937639	s17	5.89366	842	2	Lung	1
ENSMUSG00000027435	0.991031	-0.946125	-0.937639	s18	5.93926	833	5	Lung	2.32193
ENSMUSG00000027435	0.991031	-0.946125	-0.937639	s19	5.77628	2260	11	Lung	3.45943
ENSMUSG00000027435	0.991031	-0.946125	-0.937639	s20	6.21291	460502	20	Lung	4.32193
ENSMUSG00000027435	0.991031	-0.946125	-0.937639	s21	5.9887	2067	32	Lung	5
ENSMUSG00000027435	0.991031	-0.946125	-0.937639	s22	6.31019	1979	61	Lung	5.93074
ENSMUSG00000027435	0.991031	-0.946125	-0.937639	s23	5.73806	700	93	Lung	6.53916
ENSMUSG00000027435	0.991031	-0.946125	-0.937639	s24	6.56589	705	93	Lung	6.53916
ENSMUSG00000027435	0.991031	-0.946125	-0.937639	s25	5.98531	2053	144	Lung	7.16993
ENSMUSG00000027435	0.991031	-0.946125	-0.937639	s26	5.71171	1753	232	Lung	7.85798
ENSMUSG00000027435	0.991031	-0.946125	-0.937639	s27	5.81261	1625	303	Lung	8.24317
ENSMUSG00000027435	0.991031	-0.946125	-0.937639	s28	5.17429	586	649	Lung	9.34207
ENSMUSG00000027435	0.991031	-0.946125	-0.937639	s29	4.0932	561	654	Lung	9.35315
ENSMUSG00000027435	0.991031	-0.946125	-0.937639	s30	4.39031	457	904	Lung	9.82018
ENSMUSG00000027435	0.991031	-0.946125	-0.937639	s31	5.48739	465	904	Lung	9.82018
ENSMUSG00000027435	0.991031	-0.946125	-0.937639	s32	2.39034	841	2	Liver	1
ENSMUSG00000027435	0.991031	-0.946125	-0.937639	s33	2.42305	842	2	Liver	1
ENSMUSG00000027435	0.991031	-0.946125	-0.937639	s34	2.34997	833	5	Liver	2.32193
ENSMUSG00000027435	0.991031	-0.946125	-0.937639	s35	2.23106	2260	11	Liver	3.45943
ENSMUSG00000027435	0.991031	-0.946125	-0.937639	s36	1.86046	460502	20	Liver	4.32193
ENSMUSG00000027435	0.991031	-0.946125	-0.937639	s37	1.4244	2067	32	Liver	5
ENSMUSG00000027435	0.991031	-0.946125	-0.937639	s38	2.00422	1979	61	Liver	5.93074
ENSMUSG00000027435	0.991031	-0.946125	-0.937639	s39	1.57336	700	93	Liver	6.53916
ENSMUSG00000027435	0.991031	-0.946125	-0.937639	s40	1.42495	705	93	Liver	6.53916
ENSMUSG00000027435	0.991031	-0.946125	-0.937639	s41	1.1672	2053	144	Liver	7.16993
ENSMUSG00000027435	0.991031	-0.946125	-0.937639	s42	1.4138	1753	232	Liver	7.85798
ENSMUSG00000027435	0.991031	-0.946125	-0.937639	s43	1.74986	1625	303	Liver	8.24317
ENSMUSG00000027435	0.991031	-0.946125	-0.937639	s44	1.23451	586	649	Liver	9.34207
ENSMUSG00000027435	0.991031	-0.946125	-0.937639	s45	1.25964	561	654	Liver	9.35315
ENSMUSG00000027435	0.991031	-0.946125	-0.937639	s46	1.30431	457	904	Liver	9.82018
ENSMUSG00000027435	0.991031	-0.946125	-0.937639	s47	1.50547	465	904	Liver	9.82018
ENSMUSG00000027435	0.991031	-0.946125	-0.937639	s48	3.84566	841	2	Muscle	1
ENSMUSG00000027435	0.991031	-0.946125	-0.937639	s49	3.78325	842	2	Muscle	1
ENSMUSG00000027435	0.991031	-0.946125	-0.937639	s50	4.01402	833	5	Muscle	2.32193
ENSMUSG00000027435	0.991031	-0.946125	-0.937639	s51	3.33646	2260	11	Muscle	3.45943
ENSMUSG00000027435	0.991031	-0.946125	-0.937639	s52	3.20219	460502	20	Muscle	4.32193
ENSMUSG00000027435	0.991031	-0.946125	-0.937639	s53	3.68212	2067	32	Muscle	5
ENSMUSG00000027435	0.991031	-0.946125	-0.937639	s54	2.28262	1979	61	Muscle	5.93074
ENSMUSG00000027435	0.991031	-0.946125	-0.937639	s55	2.05592	700	93	Muscle	6.53916
ENSMUSG00000027435	0.991031	-0.946125	-0.937639	s56	2.52953	705	93	Muscle	6.53916
ENSMUSG00000027435	0.991031	-0.946125	-0.937639	s57	2.57123	2053	144	Muscle	7.16993
ENSMUSG00000027435	0.991031	-0.946125	-0.937639	s58	2.23401	1753	232	Muscle	7.85798
ENSMUSG00000027435	0.991031	-0.946125	-0.937639	s59	2.57936	1625	303	Muscle	8.24317
ENSMUSG00000027435	0.991031	-0.946125	-0.937639	s60	2.85818	586	649	Muscle	9.34207
ENSMUSG00000027435	0.991031	-0.946125	-0.937639	s61	2.75303	561	654	Muscle	9.35315
ENSMUSG00000027435	0.991031	-0.946125	-0.937639	s62	2.0725	457	904	Muscle	9.82018
ENSMUSG00000027435	0.991031	-0.946125	-0.937639	s63	2.60246	465	904	Muscle	9.82018

## Sheet: sdata4
period	change	n
Development	Converge	772
Development	Diverge	1809
Ageing	Converge	42
Ageing	Diverge	20

## Sheet: sdata5
period	Ratio	facet	Lmin	Lmax	LRatio
Development	0.426755	Conv/Div Ratio	-1.3	-1.03	-1.22852
Ageing	2.1	Conv/Div Ratio	0.26	1.5	1.07039

## Sheet: sdata6
ind_id	age	meanCoV	medianCoV	period
457	904	0.514649	0.345614	Ageing
561	654	0.512232	0.351972	Ageing
586	649	0.517471	0.353608	Ageing
700	93	0.515543	0.352144	Ageing
705	93	0.519331	0.356034	Ageing
833	5	0.484346	0.317291	Development
841	2	0.486834	0.320783	Development
842	2	0.486034	0.317013	Development
1625	303	0.511878	0.352603	Ageing
1753	232	0.522467	0.355686	Ageing
1979	61	0.51565	0.354385	Development
2053	144	0.515363	0.346036	Ageing
2067	32	0.510488	0.344026	Development
2260	11	0.490858	0.322251	Development
460502	20	0.517723	0.355796	Development

## Sheet: sdata7
gene_id	ind_id	scCoV	age	cluster
ENSMUSG00000033845	841	-1.37379	2	7
ENSMUSG00000025903	841	-0.0769622	2	3
ENSMUSG00000033813	841	0.244148	2	6
ENSMUSG00000061024	841	-0.895467	2	3
ENSMUSG00000046101	841	-0.630756	2	7
ENSMUSG00000057715	841	-0.340214	2	6
ENSMUSG00000025937	841	-0.921047	2	6
ENSMUSG00000025935	841	-1.40069	2	7
ENSMUSG00000025917	841	-1.60211	2	7
ENSMUSG00000092083	841	-1.46104	2	2
ENSMUSG00000043716	841	-2.08971	2	4
ENSMUSG00000025940	841	-1.53958	2	7
ENSMUSG00000079658	841	-2.26036	2	1
ENSMUSG00000067780	841	-0.0412532	2	1
ENSMUSG00000025776	841	0.862775	2	4
ENSMUSG00000041809	841	-0.428189	2	5
ENSMUSG00000026155	841	-1.02628	2	4
ENSMUSG00000026064	841	-2.00679	2	4
ENSMUSG00000048874	841	0.35452	2	6
ENSMUSG00000045216	841	-1.78895	2	2
ENSMUSG00000037408	841	-1.32495	2	7
ENSMUSG00000061518	841	-1.65318	2	2
ENSMUSG00000037509	841	-0.861749	2	2
ENSMUSG00000026121	841	-0.344568	2	6
ENSMUSG00000046337	841	-0.841153	2	5
ENSMUSG00000026112	841	-1.76362	2	7
ENSMUSG00000026110	841	-0.86899	2	6
ENSMUSG00000026116	841	-0.288085	2	6
ENSMUSG00000037216	841	-2.26251	2	4
ENSMUSG00000026087	841	-1.58106	2	2
ENSMUSG00000026082	841	-0.141113	2	7
ENSMUSG00000037138	841	0.235465	2	3
ENSMUSG00000026078	841	-1.7465	2	2
ENSMUSG00000026080	841	-0.265847	2	3
ENSMUSG00000003135	841	-1.68471	2	7
ENSMUSG00000048234	841	-1.13229	2	4
ENSMUSG00000050967	841	-0.403244	2	5
ENSMUSG00000073702	841	-1.66071	2	4
ENSMUSG00000003134	841	-0.425774	2	6
ENSMUSG00000026069	841	-0.0614012	2	6
ENSMUSG00000026072	841	1.0278	2	3
ENSMUSG00000079588	841	0.0349287	2	4
ENSMUSG00000026073	841	-0.470309	2	6
ENSMUSG00000008136	841	-1.45146	2	2
ENSMUSG00000047343	841	-2.00531	2	7
ENSMUSG00000056870	841	0.730167	2	6
ENSMUSG00000041763	841	-1.10337	2	7
ENSMUSG00000026043	841	-0.186661	2	7
ENSMUSG00000026042	841	-0.386088	2	2
ENSMUSG00000026074	841	-0.441092	2	3
ENSMUSG00000045954	841	0.250591	2	3
ENSMUSG00000018417	841	-1.5104	2	7
ENSMUSG00000002881	841	-2.0906	2	2
ENSMUSG00000043015	841	-1.43824	2	2
ENSMUSG00000043629	841	-0.782369	2	2
ENSMUSG00000026098	841	-1.24022	2	2
ENSMUSG00000041426	841	-1.19914	2	4
ENSMUSG00000026095	841	-1.32879	2	7
ENSMUSG00000052331	841	-1.85948	2	2
ENSMUSG00000025980	841	-0.558312	2	5
ENSMUSG00000073676	841	-1.73559	2	1
ENSMUSG00000038323	841	-0.928878	2	7
ENSMUSG00000025971	841	-1.50582	2	7
ENSMUSG00000063558	841	-2.27455	2	4
ENSMUSG00000026039	841	-0.736551	2	4
ENSMUSG00000026032	841	-0.985343	2	1
ENSMUSG00000026029	841	-1.31322	2	7
ENSMUSG00000026034	841	-1.10252	2	4
ENSMUSG00000026027	841	-1.148	2	7
ENSMUSG00000026036	841	1.43473	2	3
ENSMUSG00000047361	841	-0.408261	2	5
ENSMUSG00000026021	841	0.226376	2	1
ENSMUSG00000049439	841	-1.23922	2	2
ENSMUSG00000026019	841	-0.168	2	5
ENSMUSG00000052062	841	-0.00681003	2	5
ENSMUSG00000025962	841	-1.08709	2	1
ENSMUSG00000045005	841	0.368785	2	6
ENSMUSG00000025968	841	-1.09965	2	7
ENSMUSG00000061816	841	-0.258778	2	5
ENSMUSG00000039395	841	-0.764089	2	5
ENSMUSG00000026187	841	-1.03136	2	5
ENSMUSG00000026189	841	-0.314244	2	6
ENSMUSG00000046330	841	-1.63143	2	4
ENSMUSG00000026180	841	-0.808552	2	5
ENSMUSG00000026185	841	-0.470383	2	3
ENSMUSG00000026172	841	-0.728274	2	2
ENSMUSG00000033257	841	-1.37797	2	2
ENSMUSG00000026174	841	-0.82563	2	2
ENSMUSG00000033364	841	-1.31058	2	7
ENSMUSG00000033159	841	-1.12895	2	2
ENSMUSG00000049339	841	-1.62203	2	7
ENSMUSG00000026208	841	0.376159	2	3
ENSMUSG00000026198	841	0.146151	2	1
ENSMUSG00000026199	841	0.0449611	2	7
ENSMUSG00000033021	841	0.588976	2	6
ENSMUSG00000026207	841	-1.7337	2	2
ENSMUSG00000026213	841	-1.05545	2	3
ENSMUSG00000026245	841	-0.844193	2	7
ENSMUSG00000026201	841	-1.25479	2	7
ENSMUSG00000026248	841	-0.598715	2	7
ENSMUSG00000055980	841	-1.97678	2	2
ENSMUSG00000026235	841	-0.229265	2	2
ENSMUSG00000026150	841	0.015527	2	4
ENSMUSG00000079445	841	-1.21567	2	1
ENSMUSG00000053333	841	-0.0871178	2	3
ENSMUSG00000026238	841	-1.73766	2	7
ENSMUSG00000026254	841	-1.53957	2	7
ENSMUSG00000056055	841	-0.692847	2	7
ENSMUSG00000090124	841	-1.00284	2	2
ENSMUSG00000054545	841	-0.630819	2	2
ENSMUSG00000089943	841	-1.67448	2	2
ENSMUSG00000089960	841	-0.470137	2	1
ENSMUSG00000044337	841	-1.43131	2	1
ENSMUSG00000048126	841	-0.152111	2	6
ENSMUSG00000067071	841	-1.20273	2	7
ENSMUSG00000047443	841	-0.203782	2	5
ENSMUSG00000026309	841	-1.71549	2	4
ENSMUSG00000026260	841	-0.668992	2	2
ENSMUSG00000034220	841	-0.603559	2	4
ENSMUSG00000026269	841	-0.726321	2	2
ENSMUSG00000026283	841	-0.77609	2	6
ENSMUSG00000040710	841	-1.52948	2	4
ENSMUSG00000040693	841	-1.245	2	2
ENSMUSG00000040648	841	-0.822424	2	3
ENSMUSG00000056536	841	-0.0591695	2	3
ENSMUSG00000026377	841	-0.816636	2	1
ENSMUSG00000037035	841	-0.574213	2	5
ENSMUSG00000004451	841	-1.09098	2	5
ENSMUSG00000036975	841	-2.10774	2	7
ENSMUSG00000026388	841	-1.5519	2	6
ENSMUSG00000003721	841	-1.83356	2	4
ENSMUSG00000026344	841	-0.768398	2	5
ENSMUSG00000049690	841	-0.71665	2	5
ENSMUSG00000026349	841	0.262842	2	1
ENSMUSG00000036155	841	-0.949337	2	7
ENSMUSG00000026347	841	0.00715588	2	3
ENSMUSG00000026353	841	-1.87343	2	2
ENSMUSG00000026356	841	-2.08657	2	2
ENSMUSG00000045382	841	-1.84658	2	2
ENSMUSG00000042510	841	-0.267227	2	5
ENSMUSG00000026417	841	-0.678071	2	4
ENSMUSG00000056211	841	-1.95709	2	2
ENSMUSG00000016528	841	-0.896714	2	7
ENSMUSG00000042349	841	-0.313436	2	2
ENSMUSG00000046404	841	0.31714	2	3
ENSMUSG00000042268	841	-0.229786	2	1
ENSMUSG00000026433	841	-0.351796	2	2
ENSMUSG00000009772	841	-1.69723	2	2
ENSMUSG00000026435	841	-0.932048	2	5
ENSMUSG00000026439	841	-0.848762	2	7
ENSMUSG00000042066	841	-1.23502	2	2
ENSMUSG00000026443	841	-1.29454	2	1
ENSMUSG00000070644	841	0.146521	2	5
ENSMUSG00000070643	841	-0.0188734	2	5
ENSMUSG00000090553	841	-1.90779	2	4
ENSMUSG00000010311	841	-1.07082	2	5
ENSMUSG00000026458	841	-0.548348	2	5
ENSMUSG00000042305	841	-1.31318	2	2
ENSMUSG00000026457	841	-0.820278	2	7
ENSMUSG00000026429	841	-1.42791	2	7
ENSMUSG00000042793	841	-0.58312	2	7
ENSMUSG00000073557	841	-0.910832	2	7
ENSMUSG00000026424	841	-1.31869	2	2
ENSMUSG00000062580	841	-0.226384	2	1
ENSMUSG00000041889	841	-1.36135	2	7
ENSMUSG00000041879	841	-0.997747	2	2
ENSMUSG00000041801	841	-1.25585	2	3
ENSMUSG00000026411	841	-0.857285	2	5
ENSMUSG00000026398	841	-1.13783	2	2
ENSMUSG00000026365	841	-0.0601433	2	3
ENSMUSG00000033849	841	0.492245	2	6
ENSMUSG00000018196	841	-0.129345	2	7
ENSMUSG00000026360	841	-1.41301	2	7
ENSMUSG00000018189	841	0.021909	2	3
ENSMUSG00000052748	841	0.668357	2	6
ENSMUSG00000026483	841	-1.36782	2	5
ENSMUSG00000014980	841	-0.807609	2	1
ENSMUSG00000026482	841	-1.28993	2	7
ENSMUSG00000042772	841	-0.561104	2	6
ENSMUSG00000026478	841	0.333402	2	5
ENSMUSG00000026475	841	-1.29911	2	2
ENSMUSG00000042671	841	0.145932	2	1
ENSMUSG00000004110	841	0.502772	2	5
ENSMUSG00000033684	841	-0.46815	2	3
ENSMUSG00000026600	841	-0.95617	2	1
ENSMUSG00000050565	841	-1.19704	2	1
ENSMUSG00000033557	841	0.14649	2	5
ENSMUSG00000033488	841	0.120098	2	3
ENSMUSG00000026594	841	-0.921455	2	7
ENSMUSG00000033544	841	0.541656	2	6
ENSMUSG00000014226	841	-0.229557	2	7
ENSMUSG00000040423	841	-0.608412	2	1
ENSMUSG00000026709	841	0.0976238	2	5
ENSMUSG00000026701	841	0.184471	2	5
ENSMUSG00000026694	841	-1.30992	2	3
ENSMUSG00000040181	841	-1.39379	2	2
ENSMUSG00000026691	841	-0.819057	2	5
ENSMUSG00000026586	841	-0.674761	2	1
ENSMUSG00000026581	841	-0.285368	2	3
ENSMUSG00000026584	841	-0.727065	2	7
ENSMUSG00000040723	841	-1.1038	2	7
ENSMUSG00000026564	841	-0.619034	2	2
ENSMUSG00000026566	841	-1.00204	2	5
ENSMUSG00000026575	841	-1.16228	2	7
ENSMUSG00000026687	841	-1.8106	2	2
ENSMUSG00000005763	841	-0.289711	2	1
ENSMUSG00000026558	841	-0.623574	2	5
ENSMUSG00000026688	841	0.0918436	2	3
ENSMUSG00000026683	841	-0.955005	2	1
ENSMUSG00000026678	841	0.183065	2	1
ENSMUSG00000052534	841	0.990009	2	3
ENSMUSG00000038370	841	0.645861	2	3
ENSMUSG00000058076	841	-1.78401	2	7
ENSMUSG00000005674	841	-1.49661	2	7
ENSMUSG00000006411	841	-0.602186	2	6
ENSMUSG00000045259	841	-1.33981	2	4
ENSMUSG00000038235	841	0.275797	2	5
ENSMUSG00000060244	841	-1.61982	2	6
ENSMUSG00000026641	841	0.31622	2	1
ENSMUSG00000013593	841	-1.2513	2	7
ENSMUSG00000007122	841	-1.11954	2	2
ENSMUSG00000044708	841	-1.79473	2	2
ENSMUSG00000026548	841	-0.915553	2	5
ENSMUSG00000026553	841	0.433233	2	6
ENSMUSG00000026547	841	-1.5192	2	7
ENSMUSG00000013698	841	-1.49259	2	7
ENSMUSG00000026546	841	-1.22901	2	7
ENSMUSG00000038034	841	-1.47354	2	7
ENSMUSG00000066677	841	-0.267452	2	6
ENSMUSG00000050069	841	-0.0499221	2	4
ENSMUSG00000039748	841	-1.20419	2	2
ENSMUSG00000026527	841	0.900146	2	6
ENSMUSG00000026526	841	-1.0357	2	1
ENSMUSG00000037872	841	-0.0504394	2	5
ENSMUSG00000091476	841	-0.0145785	2	6
ENSMUSG00000026492	841	-1.25246	2	7
ENSMUSG00000026500	841	-1.51237	2	4
ENSMUSG00000039630	841	-0.831089	2	7
ENSMUSG00000010609	841	-1.21967	2	7
ENSMUSG00000038855	841	-0.804765	2	5
ENSMUSG00000053963	841	-0.710365	2	6
ENSMUSG00000058729	841	-1.84757	2	7
ENSMUSG00000026509	841	-0.673473	2	5
ENSMUSG00000039384	841	-0.611755	2	7
ENSMUSG00000044854	841	-1.31458	2	2
ENSMUSG00000026620	841	-0.997044	2	1
ENSMUSG00000042901	841	0.636273	2	3
ENSMUSG00000026617	841	-1.66583	2	4
ENSMUSG00000026614	841	-0.819859	2	7
ENSMUSG00000039318	841	-1.81582	2	2
ENSMUSG00000039246	841	-2.38288	2	2
ENSMUSG00000001305	841	-1.83074	2	2
ENSMUSG00000026615	841	-1.63789	2	2
ENSMUSG00000026610	841	1.32523	2	6
ENSMUSG00000026608	841	-0.853064	2	1
ENSMUSG00000010175	841	-1.83992	2	2
ENSMUSG00000026628	841	-0.134748	2	6
ENSMUSG00000037568	841	-0.522534	2	7
ENSMUSG00000037499	841	-1.2259	2	5
ENSMUSG00000037474	841	-1.13753	2	7
ENSMUSG00000026623	841	-0.831553	2	6
ENSMUSG00000026638	841	-1.02687	2	2
ENSMUSG00000079144	841	-1.74985	2	2
ENSMUSG00000040653	841	-1.56133	2	7
ENSMUSG00000040675	841	-0.491894	2	7
ENSMUSG00000019763	841	-0.178161	2	5
ENSMUSG00000046916	841	-0.931423	2	5
ENSMUSG00000038587	841	-1.06093	2	2
ENSMUSG00000064065	841	-1.37217	2	5
ENSMUSG00000040034	841	-1.58098	2	2
ENSMUSG00000047712	841	-1.28807	2	7
ENSMUSG00000060487	841	-0.195215	2	1
ENSMUSG00000019832	841	-1.37359	2	7
ENSMUSG00000050994	841	-0.468544	2	5
ENSMUSG00000039232	841	-1.32919	2	7
ENSMUSG00000019814	841	-1.69422	2	7
ENSMUSG00000019810	841	0.176145	2	5
ENSMUSG00000019806	841	-1.34223	2	7
ENSMUSG00000039891	841	0.771229	2	1
ENSMUSG00000039910	841	-0.831333	2	3
ENSMUSG00000039879	841	-1.77821	2	6
ENSMUSG00000020009	841	-0.917192	2	5
ENSMUSG00000019992	841	-0.450119	2	5
ENSMUSG00000097327	841	-0.317748	2	7
ENSMUSG00000010461	841	-0.639333	2	7
ENSMUSG00000037370	841	-0.803	2	2
ENSMUSG00000019989	841	-1.30667	2	2
ENSMUSG00000019987	841	-0.931378	2	5
ENSMUSG00000039031	841	0.266351	2	1
ENSMUSG00000019899	841	0.240512	2	1
ENSMUSG00000019978	841	-0.576567	2	3
ENSMUSG00000075266	841	-0.832039	2	5
ENSMUSG00000019883	841	-1.15009	2	2
ENSMUSG00000000295	841	-0.684781	2	5
ENSMUSG00000019791	841	-1.84736	2	7
ENSMUSG00000019787	841	0.0325592	2	4
ENSMUSG00000019779	841	-1.09359	2	2
ENSMUSG00000063953	841	-0.994367	2	7
ENSMUSG00000051736	841	0.115893	2	3
ENSMUSG00000019845	841	-1.56019	2	2
ENSMUSG00000069662	841	-0.647363	2	3
ENSMUSG00000038510	841	0.632761	2	6
ENSMUSG00000019837	841	-0.0212255	2	5
ENSMUSG00000075232	841	-1.33774	2	7
ENSMUSG00000045555	841	-0.904811	2	5
ENSMUSG00000038446	841	-0.281276	2	6
ENSMUSG00000019843	841	-0.831272	2	3
ENSMUSG00000075225	841	-1.86906	2	4
ENSMUSG00000038302	841	0.5606	2	1
ENSMUSG00000019823	841	-1.59516	2	2
ENSMUSG00000019822	841	-1.6477	2	4
ENSMUSG00000019802	841	-0.885336	2	1
ENSMUSG00000038240	841	-0.867863	2	7
ENSMUSG00000019797	841	-1.0507	2	1
ENSMUSG00000019866	841	0.210802	2	6
ENSMUSG00000038160	841	-1.82044	2	7
ENSMUSG00000019891	841	-0.674766	2	4
ENSMUSG00000112148	841	0.174849	2	3
ENSMUSG00000023068	841	-1.50193	2	3
ENSMUSG00000038594	841	-1.79873	2	2
ENSMUSG00000058298	841	0.73922	2	5
ENSMUSG00000047669	841	0.185498	2	5
ENSMUSG00000019876	841	0.0413647	2	3
ENSMUSG00000019920	841	-1.67241	2	4
ENSMUSG00000098188	841	-0.164125	2	7
ENSMUSG00000020107	841	0.559935	2	6
ENSMUSG00000044475	841	-1.26344	2	2
ENSMUSG00000057337	841	-1.63292	2	2
ENSMUSG00000020098	841	-1.4626	2	2
ENSMUSG00000012819	841	-0.731992	2	2
ENSMUSG00000037171	841	-1.19372	2	4
ENSMUSG00000020092	841	-0.45387	2	5
ENSMUSG00000037151	841	-1.38812	2	7
ENSMUSG00000020089	841	-1.01784	2	5
ENSMUSG00000020087	841	-0.574549	2	1
ENSMUSG00000058806	841	-0.235304	2	7
ENSMUSG00000020085	841	-1.51278	2	2
ENSMUSG00000097129	841	-1.33133	2	4
ENSMUSG00000036923	841	-0.329097	2	1
ENSMUSG00000036875	841	-1.01108	2	7
ENSMUSG00000060843	841	0.0489616	2	7
ENSMUSG00000020064	841	-0.716236	2	4
ENSMUSG00000020069	841	-0.0147122	2	6
ENSMUSG00000075000	841	-1.4906	2	2
ENSMUSG00000037868	841	-1.10324	2	6
ENSMUSG00000037012	841	-1.86994	2	2
ENSMUSG00000037846	841	-1.57708	2	2
ENSMUSG00000019947	841	-0.898528	2	2
ENSMUSG00000019944	841	-1.42967	2	4
ENSMUSG00000019873	841	-1.92467	2	2
ENSMUSG00000048701	841	-0.827245	2	7
ENSMUSG00000037762	841	0.578627	2	6
ENSMUSG00000003923	841	-1.63586	2	5
ENSMUSG00000014329	841	0.968757	2	3
ENSMUSG00000037710	841	-1.52075	2	2
ENSMUSG00000037747	841	-1.12988	2	3
ENSMUSG00000019923	841	-2.15331	2	2
ENSMUSG00000001663	841	-0.00692424	2	6
ENSMUSG00000033416	841	-1.17709	2	2
ENSMUSG00000020196	841	-1.50163	2	1
ENSMUSG00000033307	841	0.270171	2	6
ENSMUSG00000000903	841	-0.535615	2	7
ENSMUSG00000050157	841	-0.75091	2	7
ENSMUSG00000000902	841	-0.861177	2	7
ENSMUSG00000001151	841	0.149131	2	3
ENSMUSG00000033208	841	-1.30424	2	7
ENSMUSG00000020230	841	-1.199	2	7
ENSMUSG00000001436	841	-1.54641	2	5
ENSMUSG00000001435	841	-1.38946	2	2
ENSMUSG00000032977	841	-1.44652	2	7
ENSMUSG00000051652	841	-1.53782	2	2
ENSMUSG00000020284	841	-1.44674	2	1
ENSMUSG00000000732	841	0.291321	2	3
ENSMUSG00000053329	841	0.987706	2	3
ENSMUSG00000020277	841	-1.53485	2	7
ENSMUSG00000032834	841	0.148117	2	3
ENSMUSG00000032714	841	0.0591117	2	5
ENSMUSG00000052151	841	-1.75363	2	7
ENSMUSG00000001211	841	0.712232	2	6
ENSMUSG00000061032	841	-2.15178	2	7
ENSMUSG00000020307	841	0.526378	2	3
ENSMUSG00000020325	841	-0.957108	2	5
ENSMUSG00000020329	841	-0.806937	2	2
ENSMUSG00000023175	841	-0.446767	2	3
ENSMUSG00000035863	841	-1.3636	2	7
ENSMUSG00000035754	841	-1.08727	2	6
ENSMUSG00000004665	841	-1.1385	2	7
ENSMUSG00000035781	841	-1.14073	2	6
ENSMUSG00000097854	841	-0.149751	2	5
ENSMUSG00000013858	841	-0.390867	2	1
ENSMUSG00000045193	841	0.358702	2	3
ENSMUSG00000020156	841	0.139709	2	6
ENSMUSG00000020153	841	-0.529621	2	3
ENSMUSG00000035835	841	-0.260326	2	3
ENSMUSG00000006498	841	-1.25336	2	7
ENSMUSG00000057729	841	0.243985	2	6
ENSMUSG00000003068	841	-0.371347	2	4
ENSMUSG00000003072	841	-1.57933	2	2
ENSMUSG00000020163	841	-0.582145	2	1
ENSMUSG00000035397	841	-1.59625	2	2
ENSMUSG00000047417	841	-0.728003	2	1
ENSMUSG00000113640	841	-0.729091	2	3
ENSMUSG00000020167	841	-1.05915	2	4
ENSMUSG00000003345	841	-1.28415	2	1
ENSMUSG00000020190	841	-1.45477	2	7
ENSMUSG00000055862	841	-1.46319	2	7
ENSMUSG00000035262	841	-0.0870096	2	1
ENSMUSG00000015312	841	0.365324	2	3
ENSMUSG00000048240	841	0.127123	2	6
ENSMUSG00000004929	841	-1.10895	2	4
ENSMUSG00000034974	841	-0.53461	2	1
ENSMUSG00000034949	841	-0.39664	2	1
ENSMUSG00000004939	841	-2.00016	2	2
ENSMUSG00000004931	841	-0.250783	2	7
ENSMUSG00000004933	841	-1.54047	2	7
ENSMUSG00000034881	841	-1.05262	2	1
ENSMUSG00000020234	841	-0.680836	2	2
ENSMUSG00000044199	841	-0.883682	2	1
ENSMUSG00000034781	841	-0.303759	2	1
ENSMUSG00000074862	841	-0.716288	2	5
ENSMUSG00000112640	841	-1.5332	2	7
ENSMUSG00000073427	841	0.400286	2	3
ENSMUSG00000063320	841	0.44894	2	6
ENSMUSG00000034612	841	-1.90207	2	2
ENSMUSG00000034560	841	0.151829	2	6
ENSMUSG00000020250	841	-1.25156	2	2
ENSMUSG00000020263	841	-0.79221	2	3
ENSMUSG00000020255	841	0.482621	2	3
ENSMUSG00000020038	841	-0.740495	2	7
ENSMUSG00000001785	841	-1.52338	2	7
ENSMUSG00000020044	841	0.495187	2	6
ENSMUSG00000035351	841	-1.8453	2	1
ENSMUSG00000020053	841	-1.44709	2	2
ENSMUSG00000020057	841	-0.124028	2	5
ENSMUSG00000020056	841	-0.695694	2	4
ENSMUSG00000020061	841	0.00993382	2	1
ENSMUSG00000019935	841	-1.34168	2	2
ENSMUSG00000074802	841	-1.02309	2	7
ENSMUSG00000019948	841	1.26934	2	1
ENSMUSG00000019961	841	-1.65997	2	4
ENSMUSG00000020017	841	-1.41213	2	2
ENSMUSG00000015889	841	0.420733	2	6
ENSMUSG00000020019	841	-1.86881	2	2
ENSMUSG00000020015	841	-1.43631	2	2
ENSMUSG00000008398	841	-0.777861	2	5
ENSMUSG00000058589	841	0.137601	2	6
ENSMUSG00000020021	841	-1.21959	2	4
ENSMUSG00000005897	841	-1.99848	2	2
ENSMUSG00000020022	841	-1.53299	2	2
ENSMUSG00000036112	841	-1.60111	2	2
ENSMUSG00000020023	841	-0.96203	2	6
ENSMUSG00000020027	841	-0.920052	2	5
ENSMUSG00000062981	841	-1.0185	2	7
ENSMUSG00000036499	841	-1.27895	2	2
ENSMUSG00000036446	841	-0.0703266	2	4
ENSMUSG00000020029	841	-0.857433	2	7
ENSMUSG00000019929	841	-0.108302	2	4
ENSMUSG00000046934	841	1.01706	2	3
ENSMUSG00000019960	841	0.00485017	2	5
ENSMUSG00000019966	841	-0.41808	2	6
ENSMUSG00000044921	841	-1.01841	2	2
ENSMUSG00000019943	841	-1.07009	2	4
ENSMUSG00000036019	841	-0.741984	2	5
ENSMUSG00000035916	841	-0.145968	2	3
ENSMUSG00000035873	841	-0.223065	2	6
ENSMUSG00000020186	841	-1.66034	2	7
ENSMUSG00000020181	841	-0.116635	2	4
ENSMUSG00000035681	841	-0.605012	2	6
ENSMUSG00000074748	841	-0.726583	2	2
ENSMUSG00000069520	841	-1.70133	2	2
ENSMUSG00000020140	841	-0.80365	2	7
ENSMUSG00000034163	841	-0.501097	2	6
ENSMUSG00000069516	841	-0.47477	2	5
ENSMUSG00000020212	841	-1.57639	2	5
ENSMUSG00000034667	841	-1.34864	2	3
ENSMUSG00000020228	841	-2.03199	2	3
ENSMUSG00000034620	841	-1.73775	2	7
ENSMUSG00000020123	841	-1.69979	2	2
ENSMUSG00000080115	841	-0.407214	2	6
ENSMUSG00000006732	841	-0.718659	2	3
ENSMUSG00000025432	841	-0.546841	2	2
ENSMUSG00000020124	841	-1.21018	2	7
ENSMUSG00000040462	841	-1.15088	2	7
ENSMUSG00000006731	841	-1.05662	2	7
ENSMUSG00000040415	841	-1.80132	2	7
ENSMUSG00000025417	841	-0.695629	2	1
ENSMUSG00000074657	841	0.872121	2	6
ENSMUSG00000040354	841	-0.996458	2	6
ENSMUSG00000025403	841	-1.99508	2	2
ENSMUSG00000025401	841	-1.33902	2	2
ENSMUSG00000099009	841	-1.60007	2	2
ENSMUSG00000069456	841	-1.64249	2	4
ENSMUSG00000025395	841	-0.682301	2	4
ENSMUSG00000071072	841	-1.69862	2	4
ENSMUSG00000025404	841	-1.52217	2	4
ENSMUSG00000051346	841	-1.17021	2	2
ENSMUSG00000039994	841	-0.240115	2	6
ENSMUSG00000040033	841	-1.78619	2	4
ENSMUSG00000039914	841	-1.03249	2	7
ENSMUSG00000005683	841	-1.47508	2	7
ENSMUSG00000025393	841	-1.0925	2	2
ENSMUSG00000014498	841	-0.985136	2	6
ENSMUSG00000025366	841	-1.42069	2	2
ENSMUSG00000090841	841	-0.383529	2	5
ENSMUSG00000025357	841	-1.57097	2	4
ENSMUSG00000025352	841	-1.39109	2	7
ENSMUSG00000025351	841	-0.693179	2	5
ENSMUSG00000025347	841	0.514107	2	6
ENSMUSG00000075702	841	-0.816893	2	5
ENSMUSG00000025354	841	0.328931	2	1
ENSMUSG00000023764	841	-1.18976	2	7
ENSMUSG00000020432	841	1.75432	2	3
ENSMUSG00000003581	841	-1.31524	2	5
ENSMUSG00000034394	841	0.833975	2	6
ENSMUSG00000002129	841	-1.58202	2	1
ENSMUSG00000020412	841	-1.72568	2	2
ENSMUSG00000059534	841	-0.740526	2	1
ENSMUSG00000020453	841	-1.23478	2	2
ENSMUSG00000034614	841	0.395498	2	5
ENSMUSG00000009076	841	-2.36855	2	2
ENSMUSG00000034354	841	-2.00996	2	2
ENSMUSG00000020396	841	-1.83998	2	2
ENSMUSG00000034285	841	-1.00827	2	2
ENSMUSG00000034201	841	-0.96243	2	7
ENSMUSG00000041961	841	-1.24281	2	4
ENSMUSG00000020482	841	-2.24513	2	2
ENSMUSG00000020484	841	-1.48678	2	2
ENSMUSG00000020475	841	-0.0215236	2	1
ENSMUSG00000020473	841	0.190198	2	2
ENSMUSG00000020477	841	-1.11492	2	1
ENSMUSG00000020471	841	-0.602081	2	6
ENSMUSG00000020476	841	-1.21003	2	7
ENSMUSG00000009079	841	-1.61426	2	7
ENSMUSG00000034175	841	-1.31562	2	2
ENSMUSG00000004393	841	-1.62029	2	3
ENSMUSG00000000384	841	-0.660014	2	5
ENSMUSG00000071866	841	-1.18822	2	7
ENSMUSG00000040978	841	-0.907773	2	7
ENSMUSG00000050830	841	-0.373062	2	1
ENSMUSG00000078974	841	-1.74123	2	4
ENSMUSG00000020122	841	-1.15692	2	7
ENSMUSG00000016984	841	-0.663166	2	3
ENSMUSG00000000581	841	-1.41371	2	1
ENSMUSG00000033953	841	-1.43254	2	2
ENSMUSG00000020116	841	-1.34711	2	7
ENSMUSG00000020160	841	-0.248489	2	6
ENSMUSG00000044066	841	-0.565497	2	7
ENSMUSG00000049800	841	-1.0418	2	6
ENSMUSG00000049659	841	0.440606	2	6
ENSMUSG00000020128	841	-1.51142	2	4
ENSMUSG00000020321	841	-1.47296	2	2
ENSMUSG00000049811	841	-0.618958	2	3
ENSMUSG00000051355	841	-1.37542	2	4
ENSMUSG00000020290	841	-1.77827	2	4
ENSMUSG00000020280	841	-0.116739	2	5
ENSMUSG00000020464	841	-0.906334	2	3
ENSMUSG00000000861	841	-1.166	2	5
ENSMUSG00000020462	841	-0.523629	2	5
ENSMUSG00000032673	841	-1.8062	2	4
ENSMUSG00000020458	841	-0.685191	2	7
ENSMUSG00000040850	841	-1.5925	2	7
ENSMUSG00000020303	841	-0.808058	2	1
ENSMUSG00000020305	841	-1.50455	2	1
ENSMUSG00000020309	841	-0.650304	2	7
ENSMUSG00000020282	841	0.892778	2	6
ENSMUSG00000069919	841	-0.207347	2	7
ENSMUSG00000069917	841	0.0855304	2	5
ENSMUSG00000020272	841	-1.15159	2	7
ENSMUSG00000020315	841	-0.479018	2	5
ENSMUSG00000020289	841	0.569268	2	6
ENSMUSG00000057967	841	-0.629555	2	6
ENSMUSG00000040594	841	-1.22322	2	7
ENSMUSG00000018848	841	-1.97069	2	2
ENSMUSG00000057098	841	-0.974785	2	2
ENSMUSG00000019189	841	-1.3313	2	7
ENSMUSG00000069899	841	-0.937327	2	2
ENSMUSG00000011254	841	-0.50818	2	3
ENSMUSG00000011256	841	-1.3928	2	2
ENSMUSG00000020399	841	-0.941285	2	7
ENSMUSG00000020354	841	-0.752585	2	1
ENSMUSG00000020340	841	-1.12779	2	3
ENSMUSG00000040283	841	-1.50003	2	4
ENSMUSG00000020357	841	-1.62376	2	4
ENSMUSG00000020362	841	-1.78018	2	1
ENSMUSG00000020376	841	-2.26921	2	2
ENSMUSG00000050567	841	-2.26925	2	4
ENSMUSG00000020381	841	-1.65874	2	2
ENSMUSG00000020368	841	-1.11789	2	3
ENSMUSG00000063564	841	-0.512162	2	5
ENSMUSG00000020385	841	-1.30746	2	4
ENSMUSG00000020386	841	-1.6971	2	7
ENSMUSG00000036391	841	-2.1414	2	2
ENSMUSG00000007850	841	-0.443138	2	2
ENSMUSG00000020402	841	-1.4714	2	7
ENSMUSG00000018239	841	-0.672069	2	1
ENSMUSG00000044894	841	-0.192248	2	5
ENSMUSG00000063652	841	-0.252398	2	6
ENSMUSG00000020334	841	0.971818	2	6
ENSMUSG00000020268	841	-0.287023	2	4
ENSMUSG00000052298	841	-1.49578	2	4
ENSMUSG00000018339	841	-1.22364	2	2
ENSMUSG00000000594	841	0.017219	2	7
ENSMUSG00000055333	841	0.324665	2	6
ENSMUSG00000020261	841	-2.51208	2	4
ENSMUSG00000020523	841	-2.28949	2	2
ENSMUSG00000037275	841	-1.45955	2	7
ENSMUSG00000056895	841	-1.1296	2	7
ENSMUSG00000049287	841	0.53618	2	3
ENSMUSG00000061462	841	-0.0320495	2	1
ENSMUSG00000036860	841	-0.929627	2	1
ENSMUSG00000020444	841	-0.806835	2	6
ENSMUSG00000020441	841	-0.792832	2	7
ENSMUSG00000048076	841	-1.54287	2	2
ENSMUSG00000061650	841	-1.85704	2	2
ENSMUSG00000000301	841	-0.234019	2	1
ENSMUSG00000020537	841	-1.44508	2	2
ENSMUSG00000042709	841	-1.37498	2	5
ENSMUSG00000042569	841	0.398764	2	3
ENSMUSG00000049323	841	-0.758716	2	6
ENSMUSG00000020534	841	-2.41434	2	4
ENSMUSG00000002812	841	-1.80174	2	2
ENSMUSG00000043284	841	-1.12118	2	7
ENSMUSG00000018931	841	-1.42892	2	2
ENSMUSG00000018932	841	-0.744302	2	7
ENSMUSG00000019102	841	-1.86957	2	5
ENSMUSG00000001039	841	-0.793168	2	5
ENSMUSG00000004837	841	-1.7211	2	7
ENSMUSG00000020528	841	0.976299	2	3
ENSMUSG00000014243	841	-1.09278	2	1
ENSMUSG00000042331	841	-1.25106	2	7
ENSMUSG00000070407	841	-0.571351	2	4
ENSMUSG00000018217	841	0.660157	2	5
ENSMUSG00000047342	841	-1.06477	2	2
ENSMUSG00000047759	841	-1.14549	2	4
ENSMUSG00000042148	841	-1.60116	2	7
ENSMUSG00000019505	841	-1.04244	2	5
ENSMUSG00000056328	841	-0.617471	2	2
ENSMUSG00000056752	841	-0.833662	2	7
ENSMUSG00000020549	841	-0.451655	2	5
ENSMUSG00000033044	841	0.0304107	2	4
ENSMUSG00000033066	841	-0.817068	2	6
ENSMUSG00000018736	841	-0.70856	2	2
ENSMUSG00000052921	841	-0.26809	2	5
ENSMUSG00000032892	841	-1.62954	2	2
ENSMUSG00000020899	841	-1.30544	2	7
ENSMUSG00000020895	841	-1.63808	2	7
ENSMUSG00000020898	841	-0.333259	2	3
ENSMUSG00000020892	841	-0.705164	2	6
ENSMUSG00000020894	841	-2.15153	2	2
ENSMUSG00000049299	841	-0.60629	2	4
ENSMUSG00000045377	841	0.618609	2	6
ENSMUSG00000018752	841	-0.278759	2	5
ENSMUSG00000097328	841	0.0736565	2	5
ENSMUSG00000005204	841	-0.439	2	4
ENSMUSG00000005198	841	-0.742827	2	1
ENSMUSG00000042298	841	-1.68011	2	2
ENSMUSG00000001588	841	0.237377	2	3
ENSMUSG00000018570	841	-1.18554	2	2
ENSMUSG00000019461	841	-1.19218	2	5
ENSMUSG00000001583	841	-1.31151	2	7
ENSMUSG00000018569	841	-1.64609	2	3
ENSMUSG00000018554	841	-0.475781	2	1
ENSMUSG00000018566	841	-1.50569	2	2
ENSMUSG00000018567	841	-1.45648	2	4
ENSMUSG00000018572	841	-1.26049	2	4
ENSMUSG00000044367	841	-0.34697	2	6
ENSMUSG00000040938	841	-1.13393	2	7
ENSMUSG00000000317	841	-1.71502	2	2
ENSMUSG00000046811	841	0.00787035	2	4
ENSMUSG00000018920	841	-0.63276	2	5
ENSMUSG00000040904	841	-0.979298	2	5
ENSMUSG00000018286	841	-1.80867	2	2
ENSMUSG00000014609	841	-0.823766	2	6
ENSMUSG00000014606	841	-0.216153	2	3
ENSMUSG00000040746	841	-0.402564	2	5
ENSMUSG00000060600	841	-0.634569	2	1
ENSMUSG00000018446	841	-0.496047	2	5
ENSMUSG00000040620	841	-0.668203	2	5
ENSMUSG00000040599	841	-1.11965	2	3
ENSMUSG00000020803	841	-1.77779	2	2
ENSMUSG00000040471	841	-1.89235	2	2
ENSMUSG00000020799	841	-0.931794	2	4
ENSMUSG00000020807	841	0.315208	2	1
ENSMUSG00000020788	841	-1.14447	2	2
ENSMUSG00000005947	841	0.570969	2	5
ENSMUSG00000047260	841	-1.62352	2	7
ENSMUSG00000040158	841	-1.83193	2	2
ENSMUSG00000005951	841	0.520017	2	1
ENSMUSG00000005949	841	-1.6039	2	4
ENSMUSG00000040667	841	-0.267853	2	1
ENSMUSG00000038807	841	-1.45891	2	4
ENSMUSG00000010554	841	0.313257	2	3
ENSMUSG00000043099	841	1.51317	2	3
ENSMUSG00000045287	841	-0.175406	2	3
ENSMUSG00000078789	841	-0.698653	2	3
ENSMUSG00000038217	841	-1.11995	2	7
ENSMUSG00000038188	841	-0.433495	2	2
ENSMUSG00000038178	841	-1.11138	2	5
ENSMUSG00000006127	841	-1.69949	2	2
ENSMUSG00000017774	841	-1.50351	2	7
ENSMUSG00000017781	841	-1.77857	2	2
ENSMUSG00000038335	841	-0.693759	2	7
ENSMUSG00000001323	841	-1.29544	2	4
ENSMUSG00000020846	841	-1.25272	2	2
ENSMUSG00000020838	841	-1.74739	2	2
ENSMUSG00000017631	841	-1.97742	2	2
ENSMUSG00000017286	841	0.0221417	2	6
ENSMUSG00000069808	841	0.604511	2	6
ENSMUSG00000038057	841	-0.408842	2	5
ENSMUSG00000038046	841	-1.60733	2	2
ENSMUSG00000037857	841	-1.48701	2	1
ENSMUSG00000072673	841	-1.3129	2	4
ENSMUSG00000000686	841	-0.749939	2	5
ENSMUSG00000017453	841	-0.609564	2	4
ENSMUSG00000037791	841	-1.09584	2	1
ENSMUSG00000020832	841	-2.04636	2	2
ENSMUSG00000061981	841	0.237458	2	4
ENSMUSG00000017405	841	-0.734941	2	7
ENSMUSG00000002059	841	-1.05697	2	7
ENSMUSG00000037593	841	-0.206415	2	2
ENSMUSG00000002052	841	-1.78934	2	1
ENSMUSG00000017390	841	-1.25622	2	2
ENSMUSG00000017615	841	-0.190149	2	5
ENSMUSG00000001105	841	-0.24095	2	5
ENSMUSG00000001123	841	0.0620493	2	7
ENSMUSG00000018334	841	-0.77414	2	7
ENSMUSG00000049612	841	-1.7734	2	2
ENSMUSG00000017639	841	-0.38148	2	3
ENSMUSG00000046909	841	-1.21242	2	7
ENSMUSG00000017692	841	-0.918753	2	3
ENSMUSG00000057181	841	0.457313	2	7
ENSMUSG00000035441	841	0.277037	2	5
ENSMUSG00000020676	841	-0.820705	2	1
ENSMUSG00000035385	841	-0.0715895	2	3
ENSMUSG00000046010	841	-1.55768	2	2
ENSMUSG00000048895	841	-1.4146	2	2
ENSMUSG00000020698	841	-0.663897	2	4
ENSMUSG00000018841	841	-1.41315	2	4
ENSMUSG00000069793	841	-1.75524	2	2
ENSMUSG00000000204	841	-0.595241	2	5
ENSMUSG00000018844	841	-1.24841	2	3
ENSMUSG00000020692	841	-0.599676	2	1
ENSMUSG00000054404	841	0.449992	2	3
ENSMUSG00000020697	841	-1.38689	2	2
ENSMUSG00000035085	841	-1.56073	2	2
ENSMUSG00000020682	841	-1.45394	2	2
ENSMUSG00000051748	841	-1.95457	2	4
ENSMUSG00000018648	841	-1.40581	2	7
ENSMUSG00000018733	841	-1.71029	2	5
ENSMUSG00000018697	841	-1.14883	2	6
ENSMUSG00000000093	841	-0.229932	2	1
ENSMUSG00000000094	841	-0.678439	2	6
ENSMUSG00000034329	841	-1.66487	2	7
ENSMUSG00000072582	841	-2.22054	2	2
ENSMUSG00000020516	841	0.278094	2	5
ENSMUSG00000018425	841	-1.99539	2	2
ENSMUSG00000020492	841	-0.596415	2	2
ENSMUSG00000047126	841	-1.57828	2	2
ENSMUSG00000007646	841	-0.586354	2	3
ENSMUSG00000046442	841	-1.748	2	2
ENSMUSG00000034177	841	-1.39724	2	4
ENSMUSG00000034156	841	-1.1192	2	3
ENSMUSG00000023723	841	-1.78741	2	7
ENSMUSG00000018379	841	-1.16703	2	7
ENSMUSG00000000275	841	-1.14958	2	2
ENSMUSG00000018428	841	-1.62064	2	2
ENSMUSG00000110344	841	-0.356976	2	5
ENSMUSG00000003948	841	-0.37113	2	4
ENSMUSG00000020544	841	-1.3577	2	7
ENSMUSG00000020857	841	-1.9911	2	2
ENSMUSG00000037601	841	-0.865086	2	5
ENSMUSG00000044177	841	-0.753341	2	7
ENSMUSG00000039110	841	-1.38008	2	7
ENSMUSG00000076435	841	-0.979229	2	1
ENSMUSG00000020870	841	-1.8541	2	3
ENSMUSG00000001506	841	0.711444	2	6
ENSMUSG00000001507	841	-0.136841	2	5
ENSMUSG00000038976	841	-1.77716	2	2
ENSMUSG00000000120	841	-0.696766	2	5
ENSMUSG00000020866	841	-1.52826	2	7
ENSMUSG00000057522	841	-0.864171	2	3
ENSMUSG00000038845	841	-1.2038	2	1
ENSMUSG00000006058	841	-1.99116	2	1
ENSMUSG00000014349	841	-0.856757	2	1
ENSMUSG00000006057	841	-1.14539	2	7
ENSMUSG00000020876	841	-0.741582	2	4
ENSMUSG00000038560	841	0.645308	2	6
ENSMUSG00000020877	841	-2.41557	2	2
ENSMUSG00000001444	841	-0.883891	2	5
ENSMUSG00000038517	841	-1.20266	2	1
ENSMUSG00000018882	841	-1.16273	2	5
ENSMUSG00000038615	841	-0.359752	2	7
ENSMUSG00000018669	841	-1.67929	2	2
ENSMUSG00000049807	841	-1.31658	2	1
ENSMUSG00000078695	841	0.201282	2	1
ENSMUSG00000050538	841	0.365678	2	5
ENSMUSG00000038366	841	-0.883115	2	7
ENSMUSG00000017400	841	-1.30533	2	7
ENSMUSG00000062312	841	-0.66194	2	5
ENSMUSG00000038150	841	-1.15517	2	7
ENSMUSG00000017404	841	-2.02897	2	2
ENSMUSG00000017499	841	-0.0608309	2	6
ENSMUSG00000037992	841	0.511662	2	3
ENSMUSG00000037944	841	-0.524643	2	3
ENSMUSG00000035849	841	-0.526548	2	5
ENSMUSG00000006930	841	-2.27057	2	7
ENSMUSG00000035530	841	-1.5947	2	7
ENSMUSG00000001552	841	0.0967899	2	5
ENSMUSG00000020918	841	-1.12504	2	1
ENSMUSG00000020917	841	-0.259156	2	3
ENSMUSG00000020919	841	-0.736509	2	7
ENSMUSG00000019173	841	-1.25081	2	7
ENSMUSG00000004044	841	-0.57604	2	5
ENSMUSG00000001755	841	-1.66845	2	2
ENSMUSG00000017801	841	-0.168515	2	3
ENSMUSG00000035198	841	-1.58417	2	2
ENSMUSG00000017167	841	-1.66923	2	2
ENSMUSG00000019302	841	-2.19191	2	4
ENSMUSG00000001240	841	-0.988401	2	5
ENSMUSG00000075528	841	-1.03302	2	2
ENSMUSG00000017146	841	-0.724123	2	3
ENSMUSG00000034993	841	-1.31678	2	5
ENSMUSG00000034947	841	-0.841526	2	4
ENSMUSG00000010362	841	0.941757	2	6
ENSMUSG00000034936	841	-0.499157	2	5
ENSMUSG00000017724	841	-1.0436	2	1
ENSMUSG00000034793	841	-0.731781	2	3
ENSMUSG00000020922	841	-1.17064	2	7
ENSMUSG00000034768	841	0.11059	2	3
ENSMUSG00000008855	841	-0.158578	2	3
ENSMUSG00000020923	841	-1.79576	2	2
ENSMUSG00000051455	841	-1.29123	2	1
ENSMUSG00000020925	841	-0.860243	2	7
ENSMUSG00000034520	841	-0.619928	2	7
ENSMUSG00000020941	841	-1.04382	2	7
ENSMUSG00000055805	841	-0.949148	2	2
ENSMUSG00000020929	841	-1.23803	2	5
ENSMUSG00000020935	841	-1.03419	2	1
ENSMUSG00000020936	841	-1.3366	2	2
ENSMUSG00000034187	841	-2.41051	2	2
ENSMUSG00000020689	841	-0.40015	2	5
ENSMUSG00000001983	841	-1.6145	2	7
ENSMUSG00000040699	841	-1.09206	2	7
ENSMUSG00000069631	841	-1.31195	2	2
ENSMUSG00000020706	841	-1.7525	2	3
ENSMUSG00000040592	841	-0.394389	2	3
ENSMUSG00000001029	841	-1.36315	2	7
ENSMUSG00000078619	841	-0.623556	2	5
ENSMUSG00000020715	841	-1.7929	2	4
ENSMUSG00000020717	841	-1.18851	2	5
ENSMUSG00000020718	841	-2.13989	2	2
ENSMUSG00000018363	841	-0.488856	2	6
ENSMUSG00000078607	841	-0.163671	2	5
ENSMUSG00000018433	841	-0.675201	2	1
ENSMUSG00000020722	841	-0.641735	2	2
ENSMUSG00000020719	841	0.191217	2	3
ENSMUSG00000020723	841	-1.08269	2	7
ENSMUSG00000020728	841	-0.585525	2	3
ENSMUSG00000020611	841	-0.924909	2	1
ENSMUSG00000020604	841	-0.00201322	2	3
ENSMUSG00000020612	841	-1.26644	2	2
ENSMUSG00000041623	841	-0.320083	2	1
ENSMUSG00000041598	841	-1.22385	2	7
ENSMUSG00000041592	841	-0.910955	2	7
ENSMUSG00000034714	841	-0.664376	2	5
ENSMUSG00000010021	841	-0.512309	2	1
ENSMUSG00000034706	841	-1.63805	2	7
ENSMUSG00000051043	841	0.289035	2	4
ENSMUSG00000047798	841	0.056539	2	3
ENSMUSG00000020733	841	-0.7873	2	7
ENSMUSG00000020734	841	-1.84677	2	7
ENSMUSG00000018858	841	0.821495	2	6
ENSMUSG00000016940	841	-0.563417	2	3
ENSMUSG00000034566	841	-1.51892	2	1
ENSMUSG00000020781	841	-1.42504	2	4
ENSMUSG00000034471	841	0.00329579	2	5
ENSMUSG00000020766	841	-1.9877	2	7
ENSMUSG00000048442	841	-1.43153	2	2
ENSMUSG00000057948	841	-1.03206	2	7
ENSMUSG00000020770	841	0.457534	2	3
ENSMUSG00000054517	841	-1.20503	2	2
ENSMUSG00000016559	841	-1.49705	2	7
ENSMUSG00000046756	841	-0.52294	2	5
ENSMUSG00000020793	841	-0.914628	2	7
ENSMUSG00000020776	841	-0.809446	2	1
ENSMUSG00000020778	841	-1.10621	2	4
ENSMUSG00000020792	841	-0.369767	2	3
ENSMUSG00000061878	841	-1.23754	2	2
ENSMUSG00000015869	841	-1.4225	2	7
ENSMUSG00000020814	841	-0.0883925	2	5
ENSMUSG00000052949	841	-1.57004	2	2
ENSMUSG00000020823	841	-1.73644	2	2
ENSMUSG00000053113	841	-0.629364	2	5
ENSMUSG00000017713	841	-0.383592	2	6
ENSMUSG00000025572	841	0.104592	2	6
ENSMUSG00000025574	841	-1.12894	2	2
ENSMUSG00000017715	841	-0.797912	2	1
ENSMUSG00000056962	841	-2.3397	2	4
ENSMUSG00000034120	841	-1.41019	2	4
ENSMUSG00000090266	841	-2.00463	2	1
ENSMUSG00000020818	841	1.23877	2	6
ENSMUSG00000017466	841	-1.07312	2	3
ENSMUSG00000025578	841	-0.211339	2	6
ENSMUSG00000039989	841	-1.71403	2	2
ENSMUSG00000039963	841	-1.12103	2	2
ENSMUSG00000039908	841	-1.55356	2	7
ENSMUSG00000013483	841	-0.609289	2	5
ENSMUSG00000025580	841	-0.966486	2	4
ENSMUSG00000070327	841	-0.500863	2	6
ENSMUSG00000039850	841	-1.45578	2	2
ENSMUSG00000025377	841	-1.26814	2	7
ENSMUSG00000025375	841	-0.957451	2	1
ENSMUSG00000025384	841	0.647775	2	3
ENSMUSG00000025127	841	-0.122708	2	4
ENSMUSG00000039640	841	-0.851464	2	5
ENSMUSG00000025792	841	-0.960913	2	7
ENSMUSG00000061111	841	-0.259123	2	5
ENSMUSG00000025130	841	-2.0178	2	2
ENSMUSG00000025135	841	-0.772645	2	5
ENSMUSG00000025140	841	-1.15707	2	5
ENSMUSG00000025132	841	-1.76706	2	7
ENSMUSG00000025138	841	-1.06965	2	7
ENSMUSG00000025144	841	-1.72344	2	7
ENSMUSG00000025145	841	-0.602874	2	5
ENSMUSG00000025142	841	-1.21101	2	2
ENSMUSG00000025150	841	-0.338933	2	7
ENSMUSG00000025161	841	-1.58639	2	2
ENSMUSG00000000056	841	-0.757646	2	7
ENSMUSG00000039238	841	-1.12457	2	4
ENSMUSG00000020661	841	-0.95515	2	5
ENSMUSG00000037486	841	-0.554359	2	6
ENSMUSG00000096199	841	-1.17646	2	7
ENSMUSG00000020652	841	-0.706345	2	7
ENSMUSG00000020639	841	1.02809	2	6
ENSMUSG00000051721	841	-1.23341	2	1
ENSMUSG00000052812	841	-0.379556	2	5
ENSMUSG00000037669	841	0.791275	2	3
ENSMUSG00000054364	841	-0.520636	2	5
ENSMUSG00000020585	841	-0.369743	2	4
ENSMUSG00000020621	841	-0.970734	2	7
ENSMUSG00000043673	841	-0.48959	2	6
ENSMUSG00000051235	841	-1.18886	2	7
ENSMUSG00000037149	841	-1.55635	2	2
ENSMUSG00000020607	841	-0.871288	2	1
ENSMUSG00000020601	841	0.0591122	2	6
ENSMUSG00000020593	841	-1.47002	2	2
ENSMUSG00000057469	841	-1.11432	2	7
ENSMUSG00000071398	841	-0.284249	2	7
ENSMUSG00000045679	841	-1.57575	2	2
ENSMUSG00000020580	841	-1.1285	2	2
ENSMUSG00000061458	841	-1.04998	2	7
ENSMUSG00000071379	841	-1.10946	2	5
ENSMUSG00000062054	841	-2.00818	2	7
ENSMUSG00000020653	841	-1.41021	2	5
ENSMUSG00000076432	841	-0.762316	2	7
ENSMUSG00000020644	841	-0.945062	2	7
ENSMUSG00000020642	841	-1.41863	2	2
ENSMUSG00000036655	841	0.701111	2	3
ENSMUSG00000020628	841	-2.01899	2	2
ENSMUSG00000020664	841	-1.35765	2	7
ENSMUSG00000002900	841	0.142082	2	5
ENSMUSG00000020648	841	-0.831587	2	4
ENSMUSG00000020650	841	-1.2537	2	7
ENSMUSG00000002996	841	-0.466301	2	4
ENSMUSG00000035860	841	-0.394233	2	6
ENSMUSG00000019256	841	-0.888772	2	1
ENSMUSG00000004698	841	-1.16535	2	5
ENSMUSG00000020577	841	-1.69271	2	2
ENSMUSG00000091007	841	-0.469947	2	1
ENSMUSG00000043153	841	0.810537	2	7
ENSMUSG00000002565	841	-0.0688428	2	1
ENSMUSG00000020547	841	-0.507443	2	7
ENSMUSG00000001627	841	-1.57136	2	2
ENSMUSG00000036257	841	-0.196401	2	7
ENSMUSG00000046314	841	-1.29854	2	7
ENSMUSG00000021047	841	-0.232321	2	3
ENSMUSG00000002688	841	-1.37899	2	1
ENSMUSG00000020953	841	-1.45665	2	2
ENSMUSG00000020952	841	-0.95563	2	3
ENSMUSG00000020956	841	0.45356	2	6
ENSMUSG00000035181	841	-1.55381	2	2
ENSMUSG00000035247	841	-1.44985	2	2
ENSMUSG00000035105	841	-1.51986	2	2
ENSMUSG00000021010	841	-2.04872	2	1
ENSMUSG00000044408	841	-2.21122	2	2
ENSMUSG00000073079	841	-1.09712	2	7
ENSMUSG00000112449	841	-1.09358	2	3
ENSMUSG00000021023	841	-1.13287	2	2
ENSMUSG00000021025	841	0.409054	2	1
ENSMUSG00000001497	841	0.187814	2	6
ENSMUSG00000001496	841	0.0782173	2	4
ENSMUSG00000045930	841	-1.11133	2	5
ENSMUSG00000047022	841	0.158199	2	3
ENSMUSG00000020994	841	-0.0136155	2	6
ENSMUSG00000020974	841	-0.690294	2	4
ENSMUSG00000043998	841	-1.6333	2	7
ENSMUSG00000020949	841	-1.18148	2	7
ENSMUSG00000020988	841	-2.04759	2	2
ENSMUSG00000054894	841	-1.6632	2	7
ENSMUSG00000021069	841	0.0541648	2	5
ENSMUSG00000021072	841	-2.10756	2	6
ENSMUSG00000021079	841	-1.11633	2	1
ENSMUSG00000060073	841	-2.21631	2	1
ENSMUSG00000019718	841	-1.72398	2	2
ENSMUSG00000051367	841	1.56567	2	6
ENSMUSG00000034442	841	-0.46885	2	7
ENSMUSG00000021108	841	-1.44222	2	4
ENSMUSG00000046768	841	-0.522253	2	7
ENSMUSG00000045690	841	-1.11116	2	6
ENSMUSG00000021087	841	0.634405	2	6
ENSMUSG00000056459	841	-1.29333	2	4
ENSMUSG00000052221	841	-1.43089	2	2
ENSMUSG00000021061	841	-0.890517	2	7
ENSMUSG00000090258	841	-0.984401	2	1
ENSMUSG00000021065	841	-1.20646	2	5
ENSMUSG00000021112	841	-1.83741	2	1
ENSMUSG00000021114	841	-1.79019	2	2
ENSMUSG00000021116	841	-1.66359	2	7
ENSMUSG00000021120	841	-1.61829	2	7
ENSMUSG00000021124	841	1.10419	2	6
ENSMUSG00000066441	841	-1.19323	2	7
ENSMUSG00000021127	841	0.710163	2	1
ENSMUSG00000015143	841	-0.406926	2	1
ENSMUSG00000021136	841	0.0727608	2	5
ENSMUSG00000021134	841	-0.140057	2	6
ENSMUSG00000042724	841	-0.0110766	2	6
ENSMUSG00000021139	841	-0.923489	2	7
ENSMUSG00000091803	841	-1.99026	2	1
ENSMUSG00000072974	841	-1.22433	2	5
ENSMUSG00000042700	841	-2.03392	2	2
ENSMUSG00000021222	841	-1.55602	2	2
ENSMUSG00000042628	841	-0.264893	2	7
ENSMUSG00000043487	841	-0.832495	2	7
ENSMUSG00000021226	841	-0.669645	2	3
ENSMUSG00000072949	841	-2.00086	2	2
ENSMUSG00000072946	841	1.12544	2	1
ENSMUSG00000042472	841	-1.0922	2	4
ENSMUSG00000021242	841	-0.108383	2	5
ENSMUSG00000008822	841	-0.72934	2	1
ENSMUSG00000034290	841	-1.11549	2	7
ENSMUSG00000004789	841	-1.26678	2	7
ENSMUSG00000034271	841	-0.74678	2	7
ENSMUSG00000021257	841	0.848673	2	3
ENSMUSG00000021032	841	0.307925	2	6
ENSMUSG00000034145	841	-1.02097	2	6
ENSMUSG00000021037	841	-0.60969	2	1
ENSMUSG00000021036	841	-1.27934	2	7
ENSMUSG00000021044	841	-1.22786	2	5
ENSMUSG00000007682	841	-0.726447	2	2
ENSMUSG00000047414	841	0.947248	2	6
ENSMUSG00000020964	841	-0.290417	2	6
ENSMUSG00000021176	841	-1.00318	2	5
ENSMUSG00000021185	841	-0.294255	2	4
ENSMUSG00000021182	841	-1.7842	2	2
ENSMUSG00000021189	841	0.686378	2	6
ENSMUSG00000041846	841	-1.71145	2	2
ENSMUSG00000021188	841	-1.30989	2	5
ENSMUSG00000044456	841	-1.15671	2	1
ENSMUSG00000041781	841	0.695185	2	3
ENSMUSG00000001175	841	-1.47617	2	4
ENSMUSG00000041669	841	-2.58519	2	1
ENSMUSG00000021200	841	-0.0467155	2	7
ENSMUSG00000055271	841	-0.083189	2	7
ENSMUSG00000091931	841	-2.16587	2	2
ENSMUSG00000046675	841	-0.608206	2	3
ENSMUSG00000060807	841	-1.4066	2	4
ENSMUSG00000041323	841	-1.3816	2	4
ENSMUSG00000041341	841	-0.447419	2	3
ENSMUSG00000048251	841	-0.458226	2	3
ENSMUSG00000021259	841	-1.66796	2	2
ENSMUSG00000021264	841	-0.440551	2	1
ENSMUSG00000040856	841	-0.651291	2	4
ENSMUSG00000021262	841	-0.824182	2	7
ENSMUSG00000021276	841	-1.57342	2	2
ENSMUSG00000037904	841	-0.780947	2	7
ENSMUSG00000021275	841	0.279774	2	6
ENSMUSG00000021279	841	-0.962045	2	1
ENSMUSG00000007411	841	-0.60757	2	6
ENSMUSG00000060950	841	-1.14868	2	6
ENSMUSG00000037787	841	-1.22015	2	3
ENSMUSG00000001270	841	-1.41778	2	7
ENSMUSG00000021290	841	-1.41189	2	1
ENSMUSG00000021294	841	-0.75932	2	6
ENSMUSG00000054013	841	0.621047	2	6
ENSMUSG00000064326	841	-0.561112	2	6
ENSMUSG00000021288	841	-1.47145	2	2
ENSMUSG00000002804	841	-0.680585	2	2
ENSMUSG00000006360	841	-1.03638	2	2
ENSMUSG00000049036	841	-1.50145	2	7
ENSMUSG00000006356	841	-1.08076	2	7
ENSMUSG00000011171	841	-0.729793	2	5
ENSMUSG00000021171	841	-0.718193	2	3
ENSMUSG00000018581	841	0.549403	2	3
ENSMUSG00000025321	841	-0.158087	2	2
ENSMUSG00000071551	841	-2.19267	2	2
ENSMUSG00000000078	841	-0.401748	2	5
ENSMUSG00000033499	841	-1.29497	2	1
ENSMUSG00000021193	841	-0.774251	2	5
ENSMUSG00000021311	841	-0.57777	2	7
ENSMUSG00000057069	841	-1.5039	2	7
ENSMUSG00000021313	841	-0.726119	2	4
ENSMUSG00000021306	841	-1.50226	2	2
ENSMUSG00000057554	841	-1.48534	2	2
ENSMUSG00000019726	841	-1.29977	2	6
ENSMUSG00000021303	841	-1.57985	2	7
ENSMUSG00000015672	841	-1.30596	2	7
ENSMUSG00000002808	841	-1.53602	2	2
ENSMUSG00000003062	841	-0.328395	2	5
ENSMUSG00000041112	841	-1.49389	2	7
ENSMUSG00000059395	841	-1.30095	2	6
ENSMUSG00000078139	841	-1.74299	2	7
ENSMUSG00000021327	841	-2.05654	2	4
ENSMUSG00000060639	841	-1.0256	2	2
ENSMUSG00000051627	841	-0.332325	2	2
ENSMUSG00000036110	841	-1.42906	2	2
ENSMUSG00000021338	841	-1.62269	2	2
ENSMUSG00000006717	841	-0.380592	2	6
ENSMUSG00000019132	841	-0.477104	2	1
ENSMUSG00000036006	841	-0.877211	2	6
ENSMUSG00000021339	841	-1.21778	2	7
ENSMUSG00000035910	841	-0.108213	2	6
ENSMUSG00000048978	841	-0.433461	2	4
ENSMUSG00000038462	841	-1.12268	2	7
ENSMUSG00000038732	841	-1.04214	2	6
ENSMUSG00000090863	841	-0.730346	2	5
ENSMUSG00000038415	841	-0.349319	2	1
ENSMUSG00000076431	841	0.506697	2	3
ENSMUSG00000044734	841	0.928717	2	6
ENSMUSG00000042842	841	0.915238	2	6
ENSMUSG00000021400	841	-1.76138	2	2
ENSMUSG00000060147	841	-1.08726	2	7
ENSMUSG00000021411	841	-1.40536	2	7
ENSMUSG00000021414	841	-1.08871	2	7
ENSMUSG00000021416	841	-0.290443	2	2
ENSMUSG00000021418	841	-2.68802	2	2
ENSMUSG00000021420	841	-1.94149	2	4
ENSMUSG00000039109	841	-1.35294	2	4
ENSMUSG00000021417	841	-2.09769	2	2
ENSMUSG00000044566	841	1.35974	2	1
ENSMUSG00000021428	841	-1.3734	2	4
ENSMUSG00000021431	841	-1.86602	2	2
ENSMUSG00000039004	841	-0.225235	2	6
ENSMUSG00000038982	841	-0.704088	2	4
ENSMUSG00000001707	841	-0.0327666	2	7
ENSMUSG00000021364	841	-1.2636	2	4
ENSMUSG00000021365	841	-1.40658	2	5
ENSMUSG00000058022	841	-0.275115	2	5
ENSMUSG00000021367	841	0.166267	2	5
ENSMUSG00000063200	841	-2.05686	2	4
ENSMUSG00000057531	841	-0.840528	2	6
ENSMUSG00000021373	841	-1.44099	2	2
ENSMUSG00000021375	841	-1.14223	2	7
ENSMUSG00000021379	841	-1.32293	2	7
ENSMUSG00000021376	841	-2.23624	2	5
ENSMUSG00000038080	841	-0.539052	2	2
ENSMUSG00000037960	841	0.879113	2	3
ENSMUSG00000021391	841	-1.34319	2	7
ENSMUSG00000021390	841	0.0591951	2	6
ENSMUSG00000037851	841	-1.28828	2	7
ENSMUSG00000035139	841	-1.74364	2	2
ENSMUSG00000047842	841	0.187251	2	6
ENSMUSG00000021451	841	-1.67563	2	2
ENSMUSG00000056749	841	-1.66766	2	2
ENSMUSG00000021460	841	-0.813838	2	6
ENSMUSG00000034987	841	-0.357455	2	6
ENSMUSG00000021474	841	-0.569563	2	5
ENSMUSG00000025872	841	-1.48109	2	1
ENSMUSG00000025869	841	-1.0521	2	7
ENSMUSG00000025873	841	-2.32701	2	2
ENSMUSG00000052087	841	-0.87711	2	7
ENSMUSG00000021485	841	-0.908613	2	5
ENSMUSG00000034686	841	-1.10238	2	7
ENSMUSG00000021494	841	-1.30037	2	2
ENSMUSG00000021495	841	0.0981583	2	6
ENSMUSG00000021497	841	-1.50662	2	2
ENSMUSG00000021509	841	-2.00577	2	5
ENSMUSG00000021540	841	-0.386424	2	6
ENSMUSG00000050002	841	-1.56241	2	7
ENSMUSG00000060176	841	-1.01809	2	7
ENSMUSG00000055254	841	0.446121	2	3
ENSMUSG00000021556	841	-0.964068	2	7
ENSMUSG00000044792	841	-1.18819	2	7
ENSMUSG00000074874	841	-0.410006	2	5
ENSMUSG00000050345	841	-0.748021	2	4
ENSMUSG00000044258	841	-1.18931	2	2
ENSMUSG00000072066	841	-0.537275	2	3
ENSMUSG00000069805	841	1.28363	2	3
ENSMUSG00000033114	841	-1.663	2	5
ENSMUSG00000038212	841	-1.88422	2	6
ENSMUSG00000100235	841	1.10786	2	2
ENSMUSG00000057842	841	-1.81348	2	2
ENSMUSG00000098905	841	-2.63084	2	5
ENSMUSG00000078995	841	-1.36323	2	2
ENSMUSG00000021520	841	-1.83763	2	1
ENSMUSG00000021519	841	-1.32229	2	1
ENSMUSG00000034617	841	-1.23971	2	7
ENSMUSG00000021598	841	-0.100549	2	7
ENSMUSG00000021594	841	-1.49412	2	7
ENSMUSG00000021595	841	-0.721536	2	5
ENSMUSG00000060969	841	-0.451292	2	6
ENSMUSG00000049538	841	-1.50812	2	2
ENSMUSG00000021606	841	-1.00813	2	1
ENSMUSG00000017756	841	-1.25797	2	2
ENSMUSG00000021608	841	-1.69104	2	2
ENSMUSG00000021567	841	-0.2992	2	5
ENSMUSG00000021573	841	-1.27438	2	2
ENSMUSG00000021575	841	-0.473406	2	5
ENSMUSG00000034152	841	0.820088	2	6
ENSMUSG00000021576	841	-0.869019	2	7
ENSMUSG00000057649	841	-0.293748	2	3
ENSMUSG00000062382	841	-1.39384	2	2
ENSMUSG00000021578	841	0.187519	2	2
ENSMUSG00000021577	841	-0.314853	2	7
ENSMUSG00000021585	841	-0.013295	2	6
ENSMUSG00000035840	841	-0.775687	2	6
ENSMUSG00000074794	841	-1.04802	2	6
ENSMUSG00000069170	841	-0.263741	2	7
ENSMUSG00000021537	841	-1.05042	2	7
ENSMUSG00000017778	841	-1.27234	2	1
ENSMUSG00000021548	841	-0.599122	2	5
ENSMUSG00000049517	841	-2.04209	2	4
ENSMUSG00000021702	841	0.384358	2	6
ENSMUSG00000021703	841	-0.71888	2	7
ENSMUSG00000021620	841	-0.325507	2	4
ENSMUSG00000014850	841	-0.987179	2	2
ENSMUSG00000007617	841	-0.0644923	2	4
ENSMUSG00000042015	841	-1.03195	2	7
ENSMUSG00000021678	841	-1.09095	2	4
ENSMUSG00000021681	841	-1.17838	2	4
ENSMUSG00000048376	841	-1.88777	2	2
ENSMUSG00000114133	841	0.16022	2	5
ENSMUSG00000021668	841	-1.42114	2	7
ENSMUSG00000091387	841	-2.29946	2	7
ENSMUSG00000021666	841	-1.55751	2	7
ENSMUSG00000021665	841	-1.3572	2	7
ENSMUSG00000005583	841	0.21096	2	6
ENSMUSG00000092116	841	-0.851161	2	3
ENSMUSG00000041685	841	-1.26807	2	6
ENSMUSG00000021650	841	-1.38033	2	1
ENSMUSG00000041632	841	-1.70382	2	2
ENSMUSG00000021646	841	-0.59351	2	4
ENSMUSG00000021640	841	-1.48409	2	5
ENSMUSG00000021638	841	0.204235	2	3
ENSMUSG00000021636	841	-1.36367	2	4
ENSMUSG00000021639	841	0.42015	2	1
ENSMUSG00000048924	841	0.619916	2	3
ENSMUSG00000045273	841	-0.648962	2	5
ENSMUSG00000021629	841	-0.917288	2	3
ENSMUSG00000078941	841	-0.0148123	2	1
ENSMUSG00000052293	841	-1.30479	2	3
ENSMUSG00000021714	841	-0.70753	2	2
ENSMUSG00000068184	841	-1.59833	2	1
ENSMUSG00000021692	841	-0.578317	2	7
ENSMUSG00000021759	841	-1.05255	2	5
ENSMUSG00000042379	841	-1.02158	2	4
ENSMUSG00000021760	841	-1.19635	2	7
ENSMUSG00000021764	841	-1.17926	2	1
ENSMUSG00000042284	841	-1.40303	2	4
ENSMUSG00000042275	841	0.512956	2	3
ENSMUSG00000021728	841	-1.34313	2	7
ENSMUSG00000021730	841	-0.470184	2	2
ENSMUSG00000021731	841	-1.20883	2	5
ENSMUSG00000021732	841	-0.651195	2	6
ENSMUSG00000074635	841	-1.01986	2	1
ENSMUSG00000074634	841	-1.18405	2	7
ENSMUSG00000025279	841	0.489192	2	5
ENSMUSG00000025278	841	-0.719301	2	7
ENSMUSG00000023156	841	-1.18532	2	7
ENSMUSG00000033885	841	-1.07984	2	7
ENSMUSG00000021748	841	-0.811274	2	7
ENSMUSG00000097148	841	-1.4389	2	5
ENSMUSG00000056296	841	-1.95316	2	4
ENSMUSG00000068758	841	-1.75188	2	2
ENSMUSG00000045201	841	-0.519062	2	1
ENSMUSG00000021786	841	-2.16429	2	4
ENSMUSG00000021775	841	-0.477854	2	1
ENSMUSG00000023243	841	-1.52263	2	7
ENSMUSG00000021809	841	-1.95635	2	7
ENSMUSG00000021810	841	0.473424	2	3
ENSMUSG00000039599	841	-0.497975	2	1
ENSMUSG00000043004	841	-0.174157	2	3
ENSMUSG00000068697	841	-0.251231	2	7
ENSMUSG00000039376	841	0.191304	2	1
ENSMUSG00000063787	841	-1.46729	2	1
ENSMUSG00000039357	841	-0.746357	2	3
ENSMUSG00000021822	841	-0.689605	2	3
ENSMUSG00000021824	841	-0.941838	2	2
ENSMUSG00000021771	841	-1.27781	2	7
ENSMUSG00000025280	841	-1.31959	2	6
ENSMUSG00000021868	841	0.00183327	2	6
ENSMUSG00000040717	841	-0.891678	2	6
ENSMUSG00000021895	841	0.567762	2	3
ENSMUSG00000043702	841	-0.253982	2	3
ENSMUSG00000045776	841	0.216929	2	3
ENSMUSG00000042682	841	-0.394428	2	6
ENSMUSG00000021918	841	0.173606	2	6
ENSMUSG00000006527	841	-0.732991	2	3
ENSMUSG00000042354	841	-1.80611	2	7
ENSMUSG00000071547	841	-1.75551	2	2
ENSMUSG00000042323	841	0.455762	2	1
ENSMUSG00000058351	841	-0.409809	2	4
ENSMUSG00000021904	841	-0.696974	2	4
ENSMUSG00000021902	841	-2.32597	2	2
ENSMUSG00000019027	841	-0.475483	2	7
ENSMUSG00000014496	841	-1.18962	2	7
ENSMUSG00000021900	841	-1.69194	2	2
ENSMUSG00000021893	841	-0.594335	2	7
ENSMUSG00000021906	841	-0.50931	2	1
ENSMUSG00000013701	841	-0.912826	2	7
ENSMUSG00000021913	841	-1.74471	2	2
ENSMUSG00000050666	841	0.36216	2	5
ENSMUSG00000041471	841	-0.0434395	2	6
ENSMUSG00000041445	841	-1.01425	2	2
ENSMUSG00000021798	841	0.00488544	2	1
ENSMUSG00000041078	841	1.00893	2	6
ENSMUSG00000021910	841	-1.4773	2	7
ENSMUSG00000049235	841	-0.945522	2	7
ENSMUSG00000062014	841	-0.965406	2	4
ENSMUSG00000050335	841	-0.752306	2	5
ENSMUSG00000021840	841	-2.16057	2	2
ENSMUSG00000006288	841	-1.72873	2	5
ENSMUSG00000090799	841	-1.1729	2	7
ENSMUSG00000006281	841	-1.279	2	2
ENSMUSG00000006289	841	-1.4366	2	2
ENSMUSG00000021880	841	0.408831	2	3
ENSMUSG00000035960	841	-0.206613	2	5
ENSMUSG00000035726	841	-0.523634	2	3
ENSMUSG00000004562	841	0.575667	2	6
ENSMUSG00000049295	841	-0.308026	2	4
ENSMUSG00000022159	841	-0.794066	2	5
ENSMUSG00000022160	841	-0.378133	2	5
ENSMUSG00000010406	841	-1.38859	2	4
ENSMUSG00000000959	841	-1.17919	2	5
ENSMUSG00000022175	841	-1.03673	2	1
ENSMUSG00000022177	841	-1.12731	2	4
ENSMUSG00000022178	841	-1.1231	2	5
ENSMUSG00000022179	841	-1.94623	2	2
ENSMUSG00000022193	841	-1.27269	2	7
ENSMUSG00000052435	841	-0.488391	2	7
ENSMUSG00000022180	841	-0.885701	2	5
ENSMUSG00000022203	841	-0.229628	2	6
ENSMUSG00000022194	841	-0.618262	2	3
ENSMUSG00000022185	841	-1.10257	2	3
ENSMUSG00000002324	841	-1.4691	2	1
ENSMUSG00000002325	841	-0.465935	2	7
ENSMUSG00000002326	841	-1.4153	2	7
ENSMUSG00000010376	841	-1.52985	2	4
ENSMUSG00000040432	841	-0.821214	2	7
ENSMUSG00000022220	841	-1.25193	2	5
ENSMUSG00000019297	841	-1.15593	2	7
ENSMUSG00000023411	841	0.0826779	2	5
ENSMUSG00000040380	841	-2.0253	2	2
ENSMUSG00000047153	841	-0.147081	2	6
ENSMUSG00000061068	841	-0.393289	2	4
ENSMUSG00000022223	841	-1.286	2	7
ENSMUSG00000021938	841	0.326311	2	6
ENSMUSG00000046352	841	-1.0975	2	2
ENSMUSG00000021967	841	-0.570309	2	6
ENSMUSG00000021973	841	-1.84236	2	2
ENSMUSG00000021974	841	-1.44183	2	1
ENSMUSG00000021952	841	-0.770247	2	1
ENSMUSG00000091144	841	-1.70404	2	5
ENSMUSG00000044461	841	-1.45613	2	7
ENSMUSG00000035469	841	-2.25078	2	4
ENSMUSG00000021983	841	-0.689389	2	5
ENSMUSG00000021993	841	-1.8659	2	2
ENSMUSG00000021990	841	-0.682077	2	1
ENSMUSG00000060548	841	0.316165	2	6
ENSMUSG00000043157	841	0.201315	2	5
ENSMUSG00000021928	841	-1.27563	2	3
ENSMUSG00000048279	841	-0.949858	2	4
ENSMUSG00000021929	841	-1.11125	2	7
ENSMUSG00000035161	841	-0.801665	2	6
ENSMUSG00000014547	841	-0.0294604	2	6
ENSMUSG00000021958	841	-0.315562	2	3
ENSMUSG00000063060	841	-1.20395	2	5
ENSMUSG00000060012	841	-0.468908	2	6
ENSMUSG00000022035	841	-1.91269	2	7
ENSMUSG00000022043	841	-1.36221	2	7
ENSMUSG00000059456	841	-1.17895	2	7
ENSMUSG00000022048	841	-0.420698	2	5
ENSMUSG00000015812	841	-0.857878	2	4
ENSMUSG00000044447	841	-1.36703	2	7
ENSMUSG00000014813	841	-1.54481	2	5
ENSMUSG00000022054	841	-1.24525	2	4
ENSMUSG00000022066	841	-1.47561	2	7
ENSMUSG00000095463	841	-1.60303	2	7
ENSMUSG00000033730	841	-1.78972	2	2
ENSMUSG00000044551	841	-1.01902	2	5
ENSMUSG00000022090	841	0.527061	2	5
ENSMUSG00000022091	841	0.344767	2	5
ENSMUSG00000000776	841	-0.712944	2	3
ENSMUSG00000033589	841	-1.29069	2	7
ENSMUSG00000047911	841	-1.74583	2	7
ENSMUSG00000022099	841	-1.60931	2	2
ENSMUSG00000022108	841	-0.679234	2	7
ENSMUSG00000068015	841	-1.3134	2	2
ENSMUSG00000033405	841	-1.69742	2	7
ENSMUSG00000021998	841	-0.74448	2	7
ENSMUSG00000021996	841	-1.38145	2	2
ENSMUSG00000022003	841	-0.284459	2	6
ENSMUSG00000034893	841	-0.746383	2	6
ENSMUSG00000067995	841	-1.14243	2	4
ENSMUSG00000022009	841	-0.621015	2	3
ENSMUSG00000044350	841	-0.0510187	2	3
ENSMUSG00000022013	841	-1.08235	2	1
ENSMUSG00000022018	841	-1.81331	2	2
ENSMUSG00000022022	841	-1.72992	2	2
ENSMUSG00000075502	841	-1.27579	2	7
ENSMUSG00000055639	841	-0.441503	2	4
ENSMUSG00000022070	841	-0.865726	2	5
ENSMUSG00000098557	841	-0.674731	2	3
ENSMUSG00000033060	841	0.269984	2	6
ENSMUSG00000022120	841	0.935474	2	6
ENSMUSG00000022122	841	-0.92476	2	5
ENSMUSG00000058571	841	-1.32082	2	2
ENSMUSG00000022132	841	-0.35398	2	3
ENSMUSG00000032849	841	-0.14724	2	3
ENSMUSG00000022136	841	-1.13337	2	3
ENSMUSG00000042156	841	0.867168	2	3
ENSMUSG00000030662	841	-1.19259	2	7
ENSMUSG00000022149	841	-1.16299	2	4
ENSMUSG00000022146	841	0.351522	2	4
ENSMUSG00000022186	841	-1.62169	2	2
ENSMUSG00000022144	841	-1.02145	2	4
ENSMUSG00000039676	841	-0.852157	2	7
ENSMUSG00000072663	841	-0.258892	2	3
ENSMUSG00000054115	841	-0.765462	2	2
ENSMUSG00000044224	841	-1.66908	2	7
ENSMUSG00000047497	841	-1.25931	2	7
ENSMUSG00000022246	841	-0.867107	2	5
ENSMUSG00000022241	841	-1.75364	2	2
ENSMUSG00000039458	841	-1.31137	2	2
ENSMUSG00000022195	841	-1.06813	2	7
ENSMUSG00000022197	841	-0.0330864	2	6
ENSMUSG00000022201	841	-1.13049	2	4
ENSMUSG00000022321	841	0.0251778	2	6
ENSMUSG00000022191	841	-1.5273	2	4
ENSMUSG00000046034	841	-1.79677	2	2
ENSMUSG00000056069	841	-0.818266	2	7
ENSMUSG00000022265	841	-1.94159	2	2
ENSMUSG00000045763	841	-1.4489	2	7
ENSMUSG00000022262	841	-0.910006	2	3
ENSMUSG00000039168	841	-1.33734	2	7
ENSMUSG00000022236	841	-1.10085	2	4
ENSMUSG00000039065	841	-0.920938	2	2
ENSMUSG00000038879	841	-1.2419	2	5
ENSMUSG00000022325	841	-1.05351	2	2
ENSMUSG00000045996	841	-2.30103	2	1
ENSMUSG00000022280	841	0.0895512	2	6
ENSMUSG00000037646	841	0.169489	2	6
ENSMUSG00000014313	841	-1.46863	2	1
ENSMUSG00000022285	841	-1.53843	2	7
ENSMUSG00000022295	841	-2.0364	2	2
ENSMUSG00000022297	841	-0.437328	2	6
ENSMUSG00000022299	841	-1.65135	2	2
ENSMUSG00000051359	841	-1.31113	2	7
ENSMUSG00000022309	841	-0.948801	2	2
ENSMUSG00000022307	841	-1.36913	2	2
ENSMUSG00000022337	841	-1.05415	2	7
ENSMUSG00000038736	841	-1.05781	2	7
ENSMUSG00000038679	841	0.15487	2	5
ENSMUSG00000068522	841	-2.04511	2	2
ENSMUSG00000037343	841	-1.12632	2	5
ENSMUSG00000060429	841	-0.206776	2	6
ENSMUSG00000022367	841	-1.48761	2	2
ENSMUSG00000022358	841	-1.37181	2	7
ENSMUSG00000101892	841	-0.131622	2	6
ENSMUSG00000022354	841	-1.33529	2	7
ENSMUSG00000022353	841	-0.796634	2	7
ENSMUSG00000022350	841	-1.01355	2	5
ENSMUSG00000022347	841	-0.740343	2	4
ENSMUSG00000072568	841	-0.995664	2	5
ENSMUSG00000022351	841	-1.7878	2	7
ENSMUSG00000015002	841	-1.39292	2	7
ENSMUSG00000056258	841	-0.0646973	2	6
ENSMUSG00000022335	841	-0.638885	2	7
ENSMUSG00000079022	841	0.846053	2	6
ENSMUSG00000053469	841	-1.1417	2	4
ENSMUSG00000059895	841	-1.39468	2	7
ENSMUSG00000022595	841	-0.361335	2	5
ENSMUSG00000046380	841	-0.721919	2	5
ENSMUSG00000022594	841	-0.982143	2	4
ENSMUSG00000079018	841	-1.06939	2	5
ENSMUSG00000022579	841	-1.34315	2	2
ENSMUSG00000000934	841	-1.76537	2	6
ENSMUSG00000098678	841	-0.424277	2	1
ENSMUSG00000022577	841	-1.57545	2	2
ENSMUSG00000022571	841	-1.51438	2	5
ENSMUSG00000022570	841	-1.86954	2	2
ENSMUSG00000034429	841	-1.71034	2	2
ENSMUSG00000063704	841	-0.950416	2	7
ENSMUSG00000046761	841	-1.88349	2	7
ENSMUSG00000055762	841	-1.16884	2	4
ENSMUSG00000002524	841	-1.15955	2	7
ENSMUSG00000022564	841	-0.438805	2	4
ENSMUSG00000071724	841	-1.31327	2	7
ENSMUSG00000022551	841	-0.988243	2	7
ENSMUSG00000022553	841	-1.87972	2	2
ENSMUSG00000022557	841	-0.5909	2	3
ENSMUSG00000022550	841	-0.831213	2	2
ENSMUSG00000053929	841	-0.417313	2	3
ENSMUSG00000022546	841	-1.59204	2	2
ENSMUSG00000019080	841	-1.61983	2	2
ENSMUSG00000033762	841	-0.380914	2	1
ENSMUSG00000033707	841	-0.794233	2	6
ENSMUSG00000033669	841	0.12177	2	3
ENSMUSG00000033576	841	-0.363264	2	5
ENSMUSG00000003970	841	-1.43188	2	4
ENSMUSG00000057346	841	-1.59545	2	4
ENSMUSG00000022443	841	0.317244	2	1
ENSMUSG00000071711	841	-0.616262	2	3
ENSMUSG00000022440	841	-0.518132	2	1
ENSMUSG00000018169	841	-1.51504	2	2
ENSMUSG00000033170	841	-0.237642	2	5
ENSMUSG00000022436	841	-1.73114	2	7
ENSMUSG00000033099	841	-0.103997	2	6
ENSMUSG00000006378	841	-1.24052	2	6
ENSMUSG00000033055	841	-1.27419	2	2
ENSMUSG00000033006	841	-1.17298	2	1
ENSMUSG00000042622	841	-0.32864	2	5
ENSMUSG00000042632	841	-0.182576	2	5
ENSMUSG00000068206	841	-1.67615	2	7
ENSMUSG00000032988	841	-1.19324	2	1
ENSMUSG00000033088	841	-1.93363	2	2
ENSMUSG00000022426	841	-0.836581	2	7
ENSMUSG00000022420	841	-1.13839	2	7
ENSMUSG00000042524	841	-1.38273	2	4
ENSMUSG00000000489	841	0.871813	2	6
ENSMUSG00000009585	841	-0.452684	2	7
ENSMUSG00000022414	841	-1.95047	2	2
ENSMUSG00000042428	841	-1.53837	2	2
ENSMUSG00000042406	841	-1.50968	2	4
ENSMUSG00000089715	841	-1.98395	2	2
ENSMUSG00000022407	841	-1.67547	2	7
ENSMUSG00000060036	841	-1.52455	2	7
ENSMUSG00000022415	841	-2.18378	2	2
ENSMUSG00000022404	841	-1.59658	2	7
ENSMUSG00000022401	841	-1.00909	2	6
ENSMUSG00000022394	841	-0.662159	2	6
ENSMUSG00000048546	841	-1.80305	2	7
ENSMUSG00000061360	841	-1.79513	2	4
ENSMUSG00000042292	841	-1.60687	2	7
ENSMUSG00000022477	841	-1.57473	2	2
ENSMUSG00000022476	841	-0.328835	2	6
ENSMUSG00000022474	841	-1.89848	2	4
ENSMUSG00000096883	841	-2.01572	2	7
ENSMUSG00000022471	841	-1.44414	2	2
ENSMUSG00000022450	841	-0.473659	2	5
ENSMUSG00000049687	841	-0.0226873	2	6
ENSMUSG00000047878	841	-0.870861	2	5
ENSMUSG00000018042	841	-1.26392	2	7
ENSMUSG00000054277	841	-1.36197	2	2
ENSMUSG00000016758	841	-0.706638	2	5
ENSMUSG00000048755	841	-2.13546	2	2
ENSMUSG00000041736	841	0.148427	2	6
ENSMUSG00000041653	841	0.207788	2	3
ENSMUSG00000022437	841	-1.38909	2	7
ENSMUSG00000022438	841	-0.769567	2	7
ENSMUSG00000018040	841	-1.29581	2	1
ENSMUSG00000078954	841	-0.731904	2	5
ENSMUSG00000055745	841	-0.429563	2	6
ENSMUSG00000006369	841	-1.03678	2	7
ENSMUSG00000064284	841	-0.355949	2	5
ENSMUSG00000016541	841	-0.617341	2	7
ENSMUSG00000016028	841	-0.791525	2	2
ENSMUSG00000022382	841	-1.4368	2	7
ENSMUSG00000035891	841	-1.16524	2	7
ENSMUSG00000035828	841	-1.75141	2	2
ENSMUSG00000022610	841	-2.01672	2	7
ENSMUSG00000015363	841	-1.69324	2	2
ENSMUSG00000053137	841	-0.85036	2	1
ENSMUSG00000036606	841	-1.62362	2	7
ENSMUSG00000022614	841	-1.11844	2	2
ENSMUSG00000047394	841	-1.30941	2	1
ENSMUSG00000022617	841	-2.03432	2	2
ENSMUSG00000022620	841	-1.63025	2	7
ENSMUSG00000036197	841	-1.31308	2	4
ENSMUSG00000036158	841	-1.10995	2	2
ENSMUSG00000022451	841	-1.79977	2	7
ENSMUSG00000064210	841	-1.37402	2	2
ENSMUSG00000048218	841	-0.828617	2	4
ENSMUSG00000044250	841	0.269259	2	1
ENSMUSG00000022462	841	-0.559347	2	5
ENSMUSG00000023169	841	-1.30028	2	7
ENSMUSG00000022479	841	0.857657	2	6
ENSMUSG00000022469	841	0.227921	2	5
ENSMUSG00000048175	841	-0.121369	2	7
ENSMUSG00000022475	841	-1.05721	2	5
ENSMUSG00000022992	841	-0.925186	2	7
ENSMUSG00000033065	841	-1.23667	2	7
ENSMUSG00000051853	841	-1.77052	2	2
ENSMUSG00000022999	841	-1.0453	2	2
ENSMUSG00000023004	841	-1.66318	2	7
ENSMUSG00000043091	841	-1.76384	2	2
ENSMUSG00000023484	841	-0.522101	2	2
ENSMUSG00000023008	841	-0.121917	2	5
ENSMUSG00000037525	841	-1.31516	2	4
ENSMUSG00000023020	841	0.20318	2	1
ENSMUSG00000023018	841	-1.3905	2	2
ENSMUSG00000023025	841	-2.23545	2	5
ENSMUSG00000023021	841	-2.05642	2	2
ENSMUSG00000053559	841	-0.10051	2	7
ENSMUSG00000037204	841	-1.26386	2	2
ENSMUSG00000037185	841	-0.971298	2	5
ENSMUSG00000023039	841	-0.900823	2	1
ENSMUSG00000049382	841	-0.329383	2	3
ENSMUSG00000023043	841	0.254995	2	6
ENSMUSG00000023033	841	-1.84428	2	4
ENSMUSG00000001288	841	-0.140473	2	5
ENSMUSG00000001289	841	-0.311698	2	7
ENSMUSG00000023051	841	-1.32284	2	2
ENSMUSG00000062683	841	-1.39156	2	1
ENSMUSG00000009575	841	-1.34056	2	7
ENSMUSG00000063234	841	-0.154978	2	7
ENSMUSG00000000552	841	-0.748629	2	5
ENSMUSG00000022489	841	-1.4045	2	7
ENSMUSG00000049871	841	-1.48347	2	2
ENSMUSG00000005718	841	-1.36976	2	2
ENSMUSG00000014303	841	-1.14206	2	5
ENSMUSG00000014301	841	-0.539735	2	1
ENSMUSG00000063445	841	-0.531693	2	6
ENSMUSG00000004069	841	-0.359799	2	5
ENSMUSG00000004070	841	-1.7771	2	2
ENSMUSG00000072235	841	-0.894647	2	7
ENSMUSG00000022540	841	-1.21486	2	7
ENSMUSG00000051669	841	-0.28314	2	5
ENSMUSG00000093575	841	-0.863346	2	3
ENSMUSG00000005983	841	-0.926598	2	5
ENSMUSG00000022536	841	-0.227215	2	1
ENSMUSG00000039345	841	-2.16995	2	2
ENSMUSG00000043140	841	-1.33115	2	7
ENSMUSG00000008393	841	-1.81839	2	2
ENSMUSG00000022507	841	-2.07591	2	2
ENSMUSG00000022505	841	0.492492	2	3
ENSMUSG00000037991	841	-1.77357	2	7
ENSMUSG00000022500	841	-0.542387	2	3
ENSMUSG00000068663	841	-0.274594	2	7
ENSMUSG00000037972	841	-0.791431	2	7
ENSMUSG00000005846	841	-1.38635	2	1
ENSMUSG00000062203	841	-0.894799	2	3
ENSMUSG00000022545	841	-0.0682659	2	6
ENSMUSG00000022685	841	-1.72629	2	2
ENSMUSG00000022684	841	-2.05035	2	7
ENSMUSG00000022682	841	-0.453215	2	7
ENSMUSG00000022672	841	-0.467223	2	7
ENSMUSG00000023088	841	-0.833479	2	4
ENSMUSG00000022671	841	-1.2639	2	2
ENSMUSG00000041974	841	-1.01856	2	2
ENSMUSG00000022792	841	-1.40754	2	5
ENSMUSG00000026181	841	0.457133	2	6
ENSMUSG00000063358	841	-1.65775	2	2
ENSMUSG00000022681	841	0.147917	2	6
ENSMUSG00000022773	841	1.69255	2	3
ENSMUSG00000022771	841	-1.50831	2	7
ENSMUSG00000022763	841	-1.79462	2	2
ENSMUSG00000038965	841	-1.0501	2	7
ENSMUSG00000041774	841	-1.52043	2	7
ENSMUSG00000022760	841	-0.631131	2	1
ENSMUSG00000022761	841	-1.51484	2	1
ENSMUSG00000012017	841	-0.105858	2	5
ENSMUSG00000012114	841	-0.955583	2	1
ENSMUSG00000055692	841	-2.07042	2	2
ENSMUSG00000041720	841	-2.44137	2	1
ENSMUSG00000003528	841	-1.08013	2	7
ENSMUSG00000043811	841	-2.0258	2	2
ENSMUSG00000009097	841	-0.0466647	2	3
ENSMUSG00000041378	841	-1.21991	2	1
ENSMUSG00000005732	841	-1.50622	2	7
ENSMUSG00000022721	841	-0.965197	2	1
ENSMUSG00000041205	841	-1.34207	2	2
ENSMUSG00000000326	841	-1.64393	2	7
ENSMUSG00000071632	841	-1.96625	2	7
ENSMUSG00000022822	841	-1.28567	2	2
ENSMUSG00000033809	841	-0.390192	2	3
ENSMUSG00000022842	841	-0.826456	2	5
ENSMUSG00000022841	841	-0.922072	2	7
ENSMUSG00000006998	841	-1.22615	2	7
ENSMUSG00000005958	841	-0.222317	2	1
ENSMUSG00000021018	841	0.0201313	2	6
ENSMUSG00000022843	841	-1.45625	2	1
ENSMUSG00000044626	841	-0.743504	2	7
ENSMUSG00000022856	841	-0.930389	2	3
ENSMUSG00000004462	841	0.228289	2	3
ENSMUSG00000022861	841	-1.56488	2	4
ENSMUSG00000022885	841	-1.77331	2	7
ENSMUSG00000033355	841	0.757216	2	6
ENSMUSG00000022512	841	-1.27245	2	4
ENSMUSG00000022523	841	-0.000269362	2	1
ENSMUSG00000022525	841	0.686714	2	1
ENSMUSG00000022528	841	-0.603497	2	5
ENSMUSG00000022533	841	-1.12829	2	2
ENSMUSG00000038084	841	-1.01609	2	5
ENSMUSG00000046546	841	0.138106	2	1
ENSMUSG00000022538	841	-1.71798	2	2
ENSMUSG00000047434	841	-0.326767	2	4
ENSMUSG00000049076	841	-0.160389	2	6
ENSMUSG00000045625	841	-0.64977	2	3
ENSMUSG00000107002	841	-0.763323	2	1
ENSMUSG00000014075	841	-0.272689	2	4
ENSMUSG00000022797	841	-0.971304	2	7
ENSMUSG00000022807	841	-1.59642	2	7
ENSMUSG00000022808	841	0.107365	2	3
ENSMUSG00000035506	841	-0.419883	2	2
ENSMUSG00000075254	841	-1.15345	2	2
ENSMUSG00000022814	841	-2.14852	2	2
ENSMUSG00000035376	841	-0.417545	2	1
ENSMUSG00000034473	841	0.403422	2	3
ENSMUSG00000052133	841	-0.953942	2	4
ENSMUSG00000047746	841	-0.142869	2	1
ENSMUSG00000022828	841	-1.17203	2	7
ENSMUSG00000022820	841	-1.59473	2	1
ENSMUSG00000034243	841	-1.73939	2	2
ENSMUSG00000022816	841	1.36168	2	6
ENSMUSG00000034158	841	1.06096	2	6
ENSMUSG00000022803	841	-1.04226	2	7
ENSMUSG00000002846	841	-1.19396	2	2
ENSMUSG00000034064	841	1.09964	2	6
ENSMUSG00000022799	841	-0.547862	2	5
ENSMUSG00000049436	841	0.555418	2	3
ENSMUSG00000022790	841	-1.85967	2	4
ENSMUSG00000022793	841	-1.48126	2	5
ENSMUSG00000071550	841	-0.937241	2	7
ENSMUSG00000062082	841	-1.18039	2	5
ENSMUSG00000036208	841	-0.957871	2	7
ENSMUSG00000022668	841	-1.65788	2	2
ENSMUSG00000052459	841	-1.34575	2	7
ENSMUSG00000052013	841	-1.04499	2	7
ENSMUSG00000022663	841	-2.30242	2	2
ENSMUSG00000033157	841	-0.907881	2	7
ENSMUSG00000022651	841	-1.51207	2	5
ENSMUSG00000022656	841	-1.80484	2	7
ENSMUSG00000022661	841	-0.423113	2	1
ENSMUSG00000033149	841	-1.39198	2	2
ENSMUSG00000033031	841	-0.59259	2	6
ENSMUSG00000032965	841	-1.70925	2	4
ENSMUSG00000022636	841	-0.995792	2	2
ENSMUSG00000022757	841	-0.526278	2	6
ENSMUSG00000022751	841	-1.68012	2	2
ENSMUSG00000022752	841	0.00173512	2	5
ENSMUSG00000098274	841	-1.04982	2	4
ENSMUSG00000050312	841	0.389567	2	6
ENSMUSG00000022747	841	-0.791802	2	5
ENSMUSG00000022911	841	0.506029	2	6
ENSMUSG00000054604	841	-1.26029	2	1
ENSMUSG00000032940	841	-1.04164	2	6
ENSMUSG00000032932	841	-0.672932	2	6
ENSMUSG00000022889	841	-0.303685	2	6
ENSMUSG00000022890	841	-1.76363	2	7
ENSMUSG00000022894	841	0.0508656	2	7
ENSMUSG00000044442	841	-0.63453	2	7
ENSMUSG00000041079	841	-0.145172	2	7
ENSMUSG00000022892	841	-1.43847	2	7
ENSMUSG00000022978	841	-0.785737	2	1
ENSMUSG00000039956	841	0.170752	2	5
ENSMUSG00000039903	841	-1.46395	2	2
ENSMUSG00000039929	841	0.766894	2	3
ENSMUSG00000022972	841	-1.29275	2	7
ENSMUSG00000025616	841	-1.54019	2	4
ENSMUSG00000025613	841	-0.45858	2	1
ENSMUSG00000002489	841	-1.87688	2	2
ENSMUSG00000022971	841	-1.52614	2	7
ENSMUSG00000022969	841	-1.01328	2	5
ENSMUSG00000022962	841	-1.69843	2	7
ENSMUSG00000039680	841	-0.19505	2	7
ENSMUSG00000022952	841	-1.14077	2	2
ENSMUSG00000022941	841	-1.30595	2	4
ENSMUSG00000062609	841	-0.597325	2	3
ENSMUSG00000040732	841	-0.532735	2	5
ENSMUSG00000022895	841	-0.0847646	2	4
ENSMUSG00000022913	841	-2.18992	2	2
ENSMUSG00000040681	841	-0.775196	2	4
ENSMUSG00000074892	841	-1.13591	2	2
ENSMUSG00000005251	841	-1.15795	2	2
ENSMUSG00000036983	841	-1.97212	2	7
ENSMUSG00000004945	841	-0.622193	2	1
ENSMUSG00000023805	841	-1.05808	2	2
ENSMUSG00000000579	841	-1.38255	2	2
ENSMUSG00000023806	841	-1.41909	2	7
ENSMUSG00000052397	841	-1.29098	2	7
ENSMUSG00000022961	841	0.245949	2	6
ENSMUSG00000022960	841	-0.672457	2	1
ENSMUSG00000022956	841	-1.42516	2	7
ENSMUSG00000096255	841	-1.27879	2	1
ENSMUSG00000095687	841	-0.128632	2	1
ENSMUSG00000073471	841	-1.41152	2	2
ENSMUSG00000023873	841	0.269937	2	6
ENSMUSG00000037196	841	0.977058	2	3
ENSMUSG00000062078	841	-0.777894	2	2
ENSMUSG00000023826	841	-0.323742	2	7
ENSMUSG00000023827	841	-1.75384	2	2
ENSMUSG00000022940	841	-1.01369	2	1
ENSMUSG00000040785	841	-1.56097	2	2
ENSMUSG00000022898	841	-1.51706	2	6
ENSMUSG00000014426	841	-0.941111	2	5
ENSMUSG00000068037	841	-1.6496	2	7
ENSMUSG00000006818	841	-1.86237	2	2
ENSMUSG00000057388	841	-2.40516	2	2
ENSMUSG00000023885	841	-0.0204481	2	1
ENSMUSG00000014773	841	-0.513702	2	4
ENSMUSG00000051977	841	-0.157743	2	4
ENSMUSG00000003665	841	-0.0796281	2	1
ENSMUSG00000023882	841	-1.44249	2	2
ENSMUSG00000062743	841	-0.421021	2	7
ENSMUSG00000051341	841	-1.17921	2	7
ENSMUSG00000063383	841	-0.721562	2	2
ENSMUSG00000059142	841	-1.6385	2	5
ENSMUSG00000007564	841	-1.42106	2	4
ENSMUSG00000036820	841	-0.00812189	2	5
ENSMUSG00000072082	841	-0.778571	2	5
ENSMUSG00000039218	841	-0.993957	2	3
ENSMUSG00000002504	841	-0.271542	2	5
ENSMUSG00000041130	841	-1.64264	2	2
ENSMUSG00000040888	841	-1.62379	2	2
ENSMUSG00000024121	841	-2.20636	2	4
ENSMUSG00000024118	841	-1.61144	2	2
ENSMUSG00000052752	841	-0.994755	2	5
ENSMUSG00000079657	841	-3.10426	2	2
ENSMUSG00000002500	841	-1.07277	2	1
ENSMUSG00000075705	841	-1.4272	2	2
ENSMUSG00000040048	841	-0.422668	2	3
ENSMUSG00000024165	841	-1.96301	2	2
ENSMUSG00000047507	841	1.14634	2	3
ENSMUSG00000033825	841	-1.09471	2	2
ENSMUSG00000024176	841	-1.02969	2	7
ENSMUSG00000015120	841	-1.08754	2	7
ENSMUSG00000002279	841	-0.610937	2	1
ENSMUSG00000025739	841	-1.8664	2	5
ENSMUSG00000019214	841	-0.386987	2	6
ENSMUSG00000071202	841	-0.148753	2	7
ENSMUSG00000002280	841	-1.35589	2	7
ENSMUSG00000024112	841	-1.36231	2	5
ENSMUSG00000036775	841	-1.28962	2	7
ENSMUSG00000024180	841	-0.628678	2	7
ENSMUSG00000024181	841	-1.13323	2	1
ENSMUSG00000024182	841	0.478478	2	4
ENSMUSG00000024187	841	-1.75678	2	2
ENSMUSG00000073433	841	-2.11759	2	4
ENSMUSG00000024186	841	-1.0888	2	3
ENSMUSG00000024191	841	-1.64412	2	2
ENSMUSG00000024193	841	-1.70782	2	2
ENSMUSG00000001576	841	-1.50795	2	2
ENSMUSG00000048731	841	-1.32682	2	1
ENSMUSG00000024208	841	-1.87985	2	2
ENSMUSG00000044857	841	-1.72544	2	2
ENSMUSG00000046711	841	-0.0839332	2	4
ENSMUSG00000062753	841	-1.84811	2	7
ENSMUSG00000024213	841	-1.32056	2	4
ENSMUSG00000024217	841	0.0249577	2	6
ENSMUSG00000039512	841	-1.5569	2	7
ENSMUSG00000002274	841	-1.66197	2	2
ENSMUSG00000025737	841	-1.81883	2	2
ENSMUSG00000025732	841	0.387338	2	6
ENSMUSG00000024219	841	-0.00405251	2	6
ENSMUSG00000002249	841	-0.205254	2	6
ENSMUSG00000004864	841	-1.33534	2	7
ENSMUSG00000048905	841	-0.303799	2	3
ENSMUSG00000064147	841	-0.485988	2	3
ENSMUSG00000071172	841	-2.08997	2	4
ENSMUSG00000024011	841	-1.5601	2	4
ENSMUSG00000052712	841	-0.564511	2	3
ENSMUSG00000073436	841	0.397432	2	6
ENSMUSG00000024012	841	-1.58955	2	7
ENSMUSG00000043557	841	-1.29256	2	2
ENSMUSG00000024026	841	-0.935765	2	2
ENSMUSG00000024030	841	-0.023569	2	1
ENSMUSG00000024036	841	-0.00893104	2	5
ENSMUSG00000024018	841	-1.40068	2	6
ENSMUSG00000024038	841	-0.951355	2	1
ENSMUSG00000041119	841	-1.07755	2	1
ENSMUSG00000061613	841	-2.42232	2	4
ENSMUSG00000038146	841	-0.56799	2	2
ENSMUSG00000024045	841	-0.973129	2	4
ENSMUSG00000091586	841	-1.88371	2	4
ENSMUSG00000055202	841	0.384695	2	6
ENSMUSG00000053600	841	-1.81185	2	1
ENSMUSG00000095253	841	1.55742	2	6
ENSMUSG00000073423	841	-1.67471	2	7
ENSMUSG00000024299	841	-0.239367	2	5
ENSMUSG00000002308	841	-1.62672	2	1
ENSMUSG00000041881	841	-1.68759	2	1
ENSMUSG00000024308	841	-0.468412	2	1
ENSMUSG00000042099	841	0.0204528	2	5
ENSMUSG00000002307	841	-1.25813	2	4
ENSMUSG00000041354	841	-0.160686	2	5
ENSMUSG00000067370	841	-1.19186	2	2
ENSMUSG00000024312	841	-1.45846	2	2
ENSMUSG00000073422	841	-1.17647	2	4
ENSMUSG00000024327	841	1.09615	2	5
ENSMUSG00000079547	841	-0.0500295	2	3
ENSMUSG00000073421	841	-0.239504	2	6
ENSMUSG00000036594	841	-1.00532	2	3
ENSMUSG00000060586	841	-1.30376	2	3
ENSMUSG00000037321	841	-0.65519	2	1
ENSMUSG00000015468	841	-0.801782	2	4
ENSMUSG00000015452	841	-1.08316	2	7
ENSMUSG00000034786	841	1.81928	2	3
ENSMUSG00000034673	841	-0.348096	2	1
ENSMUSG00000015461	841	-1.44783	2	1
ENSMUSG00000024369	841	-0.795029	2	1
ENSMUSG00000092609	841	-0.673868	2	6
ENSMUSG00000007033	841	-1.2429	2	7
ENSMUSG00000007050	841	-1.30917	2	2
ENSMUSG00000034254	841	-2.16091	2	2
ENSMUSG00000007030	841	-1.04602	2	7
ENSMUSG00000073413	841	-1.13743	2	4
ENSMUSG00000007039	841	-1.3514	2	5
ENSMUSG00000007036	841	0.41451	2	7
ENSMUSG00000013787	841	-0.240234	2	1
ENSMUSG00000024401	841	0.0193565	2	3
ENSMUSG00000024399	841	-0.865448	2	7
ENSMUSG00000024403	841	-2.08129	2	2
ENSMUSG00000073411	841	-0.288857	2	3
ENSMUSG00000035929	841	0.0253701	2	6
ENSMUSG00000001524	841	-1.60249	2	3
ENSMUSG00000024393	841	-1.58777	2	1
ENSMUSG00000003541	841	-0.609901	2	5
ENSMUSG00000019432	841	-1.43733	2	7
ENSMUSG00000003534	841	-0.470529	2	2
ENSMUSG00000059714	841	-1.50075	2	4
ENSMUSG00000024422	841	-1.56964	2	2
ENSMUSG00000034595	841	-1.95679	2	2
ENSMUSG00000039220	841	-1.15502	2	1
ENSMUSG00000038500	841	0.0921051	2	3
ENSMUSG00000024429	841	-1.81673	2	1
ENSMUSG00000024446	841	-0.881638	2	2
ENSMUSG00000050747	841	0.538356	2	5
ENSMUSG00000036398	841	-0.621244	2	7
ENSMUSG00000001525	841	-1.11922	2	7
ENSMUSG00000036036	841	-0.410022	2	5
ENSMUSG00000016206	841	-1.3921	2	7
ENSMUSG00000050705	841	0.509455	2	3
ENSMUSG00000024436	841	-1.66697	2	3
ENSMUSG00000023913	841	-1.20115	2	2
ENSMUSG00000023961	841	-1.72866	2	1
ENSMUSG00000023932	841	-0.912324	2	7
ENSMUSG00000039153	841	-1.37108	2	7
ENSMUSG00000038954	841	-0.821425	2	3
ENSMUSG00000096847	841	-0.224731	2	5
ENSMUSG00000023942	841	-2.02755	2	2
ENSMUSG00000023967	841	-0.867886	2	3
ENSMUSG00000067150	841	0.039079	2	6
ENSMUSG00000023952	841	-0.954075	2	4
ENSMUSG00000032842	841	-1.49352	2	2
ENSMUSG00000023977	841	-1.68439	2	7
ENSMUSG00000023979	841	-2.72859	2	2
ENSMUSG00000034382	841	-1.60772	2	7
ENSMUSG00000023980	841	-0.135043	2	4
ENSMUSG00000034729	841	-1.61003	2	2
ENSMUSG00000032717	841	0.0475355	2	5
ENSMUSG00000023993	841	0.268842	2	3
ENSMUSG00000023992	841	-1.09169	2	2
ENSMUSG00000023988	841	-0.692675	2	3
ENSMUSG00000051682	841	0.502895	2	3
ENSMUSG00000033475	841	0.100762	2	3
ENSMUSG00000040771	841	-0.582614	2	4
ENSMUSG00000040694	841	-0.168623	2	5
ENSMUSG00000064120	841	0.535829	2	6
ENSMUSG00000038910	841	0.246494	2	5
ENSMUSG00000023994	841	0.0241922	2	1
ENSMUSG00000040658	841	-1.89321	2	2
ENSMUSG00000015605	841	-0.510617	2	7
ENSMUSG00000023972	841	-1.15278	2	7
ENSMUSG00000038545	841	0.229434	2	6
ENSMUSG00000062619	841	-1.44257	2	2
ENSMUSG00000003208	841	-0.803892	2	6
ENSMUSG00000003199	841	-0.943222	2	1
ENSMUSG00000011305	841	-0.0809524	2	6
ENSMUSG00000044469	841	-1.80053	2	2
ENSMUSG00000043683	841	-0.822727	2	7
ENSMUSG00000042625	841	-0.56838	2	1
ENSMUSG00000041168	841	-1.10436	2	4
ENSMUSG00000071054	841	-1.60392	2	7
ENSMUSG00000054723	841	-1.2593	2	5
ENSMUSG00000002379	841	-0.97842	2	1
ENSMUSG00000024206	841	-0.224649	2	2
ENSMUSG00000002661	841	-0.828393	2	3
ENSMUSG00000002660	841	0.0189424	2	6
ENSMUSG00000002658	841	-1.67092	2	2
ENSMUSG00000007670	841	-0.942802	2	1
ENSMUSG00000048915	841	-1.17598	2	2
ENSMUSG00000023965	841	-0.387061	2	7
ENSMUSG00000056515	841	-1.24471	2	7
ENSMUSG00000024098	841	-1.48821	2	4
ENSMUSG00000024096	841	-1.20524	2	2
ENSMUSG00000035842	841	-1.67652	2	2
ENSMUSG00000024099	841	-1.26091	2	7
ENSMUSG00000024101	841	-1.02615	2	3
ENSMUSG00000023460	841	0.326412	2	3
ENSMUSG00000024043	841	-1.25771	2	4
ENSMUSG00000024044	841	-1.64989	2	7
ENSMUSG00000047407	841	-0.535183	2	4
ENSMUSG00000052525	841	-0.617338	2	5
ENSMUSG00000024063	841	-0.509978	2	5
ENSMUSG00000024064	841	-0.1058	2	6
ENSMUSG00000034868	841	-1.35613	2	7
ENSMUSG00000024048	841	0.503194	2	4
ENSMUSG00000091831	841	1.0459	2	3
ENSMUSG00000024078	841	-1.38355	2	7
[truncated: 70,031 more rows]

## Sheet: sdata8
gene_id	sample_id	scexp	ind_id	age	tissue	cluster
ENSMUSG00000033845	s1	-0.535607	841	2	Cortex	5
ENSMUSG00000025903	s1	-1.76941	841	2	Cortex	19
ENSMUSG00000033813	s1	1.78449	841	2	Cortex	10
ENSMUSG00000061024	s1	0.290682	841	2	Cortex	5
ENSMUSG00000046101	s1	0.978918	841	2	Cortex	7
ENSMUSG00000057715	s1	1.26157	841	2	Cortex	13
ENSMUSG00000025937	s1	-1.19852	841	2	Cortex	16
ENSMUSG00000025935	s1	-0.933966	841	2	Cortex	22
ENSMUSG00000025917	s1	0.0952215	841	2	Cortex	9
ENSMUSG00000092083	s1	1.19777	841	2	Cortex	13
ENSMUSG00000043716	s1	0.792665	841	2	Cortex	14
ENSMUSG00000025940	s1	-0.822008	841	2	Cortex	17
ENSMUSG00000079658	s1	-0.162503	841	2	Cortex	9
ENSMUSG00000067780	s1	-0.897152	841	2	Cortex	14
ENSMUSG00000025776	s1	-0.236285	841	2	Cortex	21
ENSMUSG00000041809	s1	-0.777384	841	2	Cortex	11
ENSMUSG00000026155	s1	1.94329	841	2	Cortex	4
ENSMUSG00000026064	s1	0.037114	841	2	Cortex	20
ENSMUSG00000048874	s1	0.945784	841	2	Cortex	15
ENSMUSG00000045216	s1	0.776545	841	2	Cortex	10
ENSMUSG00000037408	s1	0.196961	841	2	Cortex	12
ENSMUSG00000061518	s1	-0.774202	841	2	Cortex	12
ENSMUSG00000037509	s1	0.989624	841	2	Cortex	13
ENSMUSG00000026121	s1	2.25808	841	2	Cortex	14
ENSMUSG00000046337	s1	-1.14479	841	2	Cortex	14
ENSMUSG00000026112	s1	-1.09449	841	2	Cortex	17
ENSMUSG00000026110	s1	1.07037	841	2	Cortex	8
ENSMUSG00000026116	s1	2.23375	841	2	Cortex	7
ENSMUSG00000037216	s1	-0.842373	841	2	Cortex	5
ENSMUSG00000026087	s1	-0.239036	841	2	Cortex	9
ENSMUSG00000026082	s1	1.19729	841	2	Cortex	24
ENSMUSG00000037138	s1	2.10151	841	2	Cortex	4
ENSMUSG00000026078	s1	-0.221947	841	2	Cortex	18
ENSMUSG00000026080	s1	1.85975	841	2	Cortex	13
ENSMUSG00000003135	s1	-0.196535	841	2	Cortex	17
ENSMUSG00000048234	s1	-1.25548	841	2	Cortex	16
ENSMUSG00000050967	s1	0.602531	841	2	Cortex	13
ENSMUSG00000073702	s1	0.671757	841	2	Cortex	14
ENSMUSG00000003134	s1	-0.400488	841	2	Cortex	22
ENSMUSG00000026069	s1	-0.901894	841	2	Cortex	21
ENSMUSG00000026072	s1	-1.54569	841	2	Cortex	22
ENSMUSG00000079588	s1	-0.614381	841	2	Cortex	9
ENSMUSG00000026073	s1	-0.924663	841	2	Cortex	25
ENSMUSG00000008136	s1	0.52761	841	2	Cortex	4
ENSMUSG00000047343	s1	-0.255528	841	2	Cortex	9
ENSMUSG00000056870	s1	-0.528071	841	2	Cortex	18
ENSMUSG00000041763	s1	0.26298	841	2	Cortex	17
ENSMUSG00000026043	s1	-0.913313	841	2	Cortex	14
ENSMUSG00000026042	s1	-0.632573	841	2	Cortex	14
ENSMUSG00000026074	s1	2.41624	841	2	Cortex	2
ENSMUSG00000045954	s1	-1.44888	841	2	Cortex	11
ENSMUSG00000018417	s1	-0.22521	841	2	Cortex	22
ENSMUSG00000002881	s1	-0.681757	841	2	Cortex	22
ENSMUSG00000043015	s1	0.0979702	841	2	Cortex	2
ENSMUSG00000043629	s1	-0.344314	841	2	Cortex	8
ENSMUSG00000026098	s1	-0.0940202	841	2	Cortex	20
ENSMUSG00000041426	s1	-0.9297	841	2	Cortex	5
ENSMUSG00000026095	s1	-0.941277	841	2	Cortex	9
ENSMUSG00000052331	s1	0.885008	841	2	Cortex	11
ENSMUSG00000025980	s1	0.792104	841	2	Cortex	5
ENSMUSG00000073676	s1	-0.391236	841	2	Cortex	19
ENSMUSG00000038323	s1	0.55161	841	2	Cortex	10
ENSMUSG00000025971	s1	-0.462407	841	2	Cortex	17
ENSMUSG00000063558	s1	-1.34755	841	2	Cortex	19
ENSMUSG00000026039	s1	0.638354	841	2	Cortex	23
ENSMUSG00000026032	s1	-1.43173	841	2	Cortex	17
ENSMUSG00000026029	s1	-1.33745	841	2	Cortex	22
ENSMUSG00000026034	s1	-0.490074	841	2	Cortex	11
ENSMUSG00000026027	s1	0.434999	841	2	Cortex	17
ENSMUSG00000026036	s1	1.94423	841	2	Cortex	24
ENSMUSG00000047361	s1	0.533917	841	2	Cortex	6
ENSMUSG00000026021	s1	0.762846	841	2	Cortex	18
ENSMUSG00000049439	s1	0.205498	841	2	Cortex	3
ENSMUSG00000026019	s1	0.570107	841	2	Cortex	24
ENSMUSG00000052062	s1	-0.993104	841	2	Cortex	25
ENSMUSG00000025962	s1	-0.962475	841	2	Cortex	17
ENSMUSG00000045005	s1	-1.55885	841	2	Cortex	22
ENSMUSG00000025968	s1	-0.839252	841	2	Cortex	17
ENSMUSG00000061816	s1	-0.696951	841	2	Cortex	9
ENSMUSG00000039395	s1	-0.796191	841	2	Cortex	5
ENSMUSG00000026187	s1	-1.42921	841	2	Cortex	17
ENSMUSG00000026189	s1	-0.981675	841	2	Cortex	16
ENSMUSG00000046330	s1	-0.166771	841	2	Cortex	14
ENSMUSG00000026180	s1	-0.585613	841	2	Cortex	1
ENSMUSG00000026185	s1	-0.125183	841	2	Cortex	18
ENSMUSG00000026172	s1	0.372471	841	2	Cortex	24
ENSMUSG00000033257	s1	1.3229	841	2	Cortex	19
ENSMUSG00000026174	s1	1.4464	841	2	Cortex	23
ENSMUSG00000033364	s1	0.951479	841	2	Cortex	24
ENSMUSG00000033159	s1	-0.82175	841	2	Cortex	3
ENSMUSG00000049339	s1	0.223391	841	2	Cortex	15
ENSMUSG00000026208	s1	-1.23234	841	2	Cortex	9
ENSMUSG00000026198	s1	-0.141357	841	2	Cortex	5
ENSMUSG00000026199	s1	-1.83032	841	2	Cortex	16
ENSMUSG00000033021	s1	-1.20805	841	2	Cortex	19
ENSMUSG00000026207	s1	0.527875	841	2	Cortex	8
ENSMUSG00000026213	s1	0.649394	841	2	Cortex	4
ENSMUSG00000026245	s1	1.16489	841	2	Cortex	12
ENSMUSG00000026201	s1	0.68398	841	2	Cortex	10
ENSMUSG00000026248	s1	-1.50832	841	2	Cortex	17
ENSMUSG00000055980	s1	0.293237	841	2	Cortex	17
ENSMUSG00000026235	s1	1.78189	841	2	Cortex	13
ENSMUSG00000026150	s1	1.74037	841	2	Cortex	8
ENSMUSG00000079445	s1	2.31404	841	2	Cortex	2
ENSMUSG00000053333	s1	1.5907	841	2	Cortex	24
ENSMUSG00000026238	s1	1.38981	841	2	Cortex	2
ENSMUSG00000026254	s1	0.630241	841	2	Cortex	23
ENSMUSG00000056055	s1	0.0895607	841	2	Cortex	13
ENSMUSG00000090124	s1	-1.00621	841	2	Cortex	16
ENSMUSG00000054545	s1	-1.25158	841	2	Cortex	22
ENSMUSG00000089943	s1	-0.522611	841	2	Cortex	16
ENSMUSG00000089960	s1	-0.673094	841	2	Cortex	16
ENSMUSG00000044337	s1	-0.596442	841	2	Cortex	18
ENSMUSG00000048126	s1	-0.827545	841	2	Cortex	14
ENSMUSG00000067071	s1	0.852268	841	2	Cortex	22
ENSMUSG00000047443	s1	-0.600661	841	2	Cortex	21
ENSMUSG00000026309	s1	0.0430798	841	2	Cortex	14
ENSMUSG00000026260	s1	-0.54038	841	2	Cortex	17
ENSMUSG00000034220	s1	0.755478	841	2	Cortex	12
ENSMUSG00000026269	s1	-1.34144	841	2	Cortex	3
ENSMUSG00000026283	s1	-1.08288	841	2	Cortex	22
ENSMUSG00000040710	s1	1.74476	841	2	Cortex	6
ENSMUSG00000040693	s1	0.0735521	841	2	Cortex	11
ENSMUSG00000040648	s1	1.36807	841	2	Cortex	10
ENSMUSG00000056536	s1	-0.228534	841	2	Cortex	20
ENSMUSG00000026377	s1	1.10931	841	2	Cortex	5
ENSMUSG00000037035	s1	0.512446	841	2	Cortex	1
ENSMUSG00000004451	s1	-0.317511	841	2	Cortex	14
ENSMUSG00000036975	s1	-0.399755	841	2	Cortex	17
ENSMUSG00000026388	s1	1.05104	841	2	Cortex	21
ENSMUSG00000003721	s1	-1.01922	841	2	Cortex	20
ENSMUSG00000026344	s1	1.10535	841	2	Cortex	13
ENSMUSG00000049690	s1	0.957518	841	2	Cortex	11
ENSMUSG00000026349	s1	0.503891	841	2	Cortex	18
ENSMUSG00000036155	s1	1.15194	841	2	Cortex	13
ENSMUSG00000026347	s1	0.43384	841	2	Cortex	6
ENSMUSG00000026353	s1	-0.0622143	841	2	Cortex	20
ENSMUSG00000026356	s1	-0.483368	841	2	Cortex	19
ENSMUSG00000045382	s1	0.36729	841	2	Cortex	14
ENSMUSG00000042510	s1	-1.06351	841	2	Cortex	11
ENSMUSG00000026417	s1	-0.878021	841	2	Cortex	22
ENSMUSG00000056211	s1	0.947521	841	2	Cortex	13
ENSMUSG00000016528	s1	-1.38768	841	2	Cortex	25
ENSMUSG00000042349	s1	-1.34851	841	2	Cortex	22
ENSMUSG00000046404	s1	-0.357279	841	2	Cortex	16
ENSMUSG00000042268	s1	-0.444974	841	2	Cortex	11
ENSMUSG00000026433	s1	-1.59307	841	2	Cortex	19
ENSMUSG00000009772	s1	-0.489472	841	2	Cortex	22
ENSMUSG00000026435	s1	-1.24838	841	2	Cortex	16
ENSMUSG00000026439	s1	0.120319	841	2	Cortex	24
ENSMUSG00000042066	s1	0.427707	841	2	Cortex	6
ENSMUSG00000026443	s1	1.70539	841	2	Cortex	13
ENSMUSG00000070644	s1	-0.345361	841	2	Cortex	16
ENSMUSG00000070643	s1	-1.16544	841	2	Cortex	11
ENSMUSG00000090553	s1	-0.116938	841	2	Cortex	14
ENSMUSG00000010311	s1	0.818148	841	2	Cortex	7
ENSMUSG00000026458	s1	1.56491	841	2	Cortex	4
ENSMUSG00000042305	s1	1.22922	841	2	Cortex	10
ENSMUSG00000026457	s1	-1.60759	841	2	Cortex	25
ENSMUSG00000026429	s1	-0.147	841	2	Cortex	9
ENSMUSG00000042793	s1	-0.326708	841	2	Cortex	4
ENSMUSG00000073557	s1	0.0723057	841	2	Cortex	8
ENSMUSG00000026424	s1	0.122294	841	2	Cortex	13
ENSMUSG00000062580	s1	-1.76455	841	2	Cortex	9
ENSMUSG00000041889	s1	0.351351	841	2	Cortex	8
ENSMUSG00000041879	s1	1.54536	841	2	Cortex	13
ENSMUSG00000041801	s1	-0.847676	841	2	Cortex	18
ENSMUSG00000026411	s1	0.488821	841	2	Cortex	2
ENSMUSG00000026398	s1	-0.56158	841	2	Cortex	16
ENSMUSG00000026365	s1	-1.37782	841	2	Cortex	22
ENSMUSG00000033849	s1	1.45396	841	2	Cortex	13
ENSMUSG00000018196	s1	1.15856	841	2	Cortex	24
ENSMUSG00000026360	s1	0.0324245	841	2	Cortex	6
ENSMUSG00000018189	s1	-0.9835	841	2	Cortex	17
ENSMUSG00000052748	s1	-0.758087	841	2	Cortex	22
ENSMUSG00000026483	s1	-1.28202	841	2	Cortex	14
ENSMUSG00000014980	s1	-0.292213	841	2	Cortex	9
ENSMUSG00000026482	s1	-0.495896	841	2	Cortex	4
ENSMUSG00000042772	s1	1.43296	841	2	Cortex	13
ENSMUSG00000026478	s1	-0.80232	841	2	Cortex	14
ENSMUSG00000026475	s1	0.252361	841	2	Cortex	10
ENSMUSG00000042671	s1	1.23559	841	2	Cortex	13
ENSMUSG00000004110	s1	1.45778	841	2	Cortex	13
ENSMUSG00000033684	s1	-1.25827	841	2	Cortex	22
ENSMUSG00000026600	s1	-0.529259	841	2	Cortex	11
ENSMUSG00000050565	s1	-1.28458	841	2	Cortex	19
ENSMUSG00000033557	s1	0.823086	841	2	Cortex	8
ENSMUSG00000033488	s1	-1.46556	841	2	Cortex	22
ENSMUSG00000026594	s1	1.91982	841	2	Cortex	7
ENSMUSG00000033544	s1	-0.514075	841	2	Cortex	21
ENSMUSG00000014226	s1	2.03685	841	2	Cortex	12
ENSMUSG00000040423	s1	0.344561	841	2	Cortex	25
ENSMUSG00000026709	s1	-0.914697	841	2	Cortex	5
ENSMUSG00000026701	s1	-1.71714	841	2	Cortex	1
ENSMUSG00000026694	s1	0.238055	841	2	Cortex	5
ENSMUSG00000040181	s1	-1.23385	841	2	Cortex	3
ENSMUSG00000026691	s1	-0.705447	841	2	Cortex	1
ENSMUSG00000026586	s1	-0.41876	841	2	Cortex	9
ENSMUSG00000026581	s1	-0.929257	841	2	Cortex	1
ENSMUSG00000026584	s1	0.118958	841	2	Cortex	10
ENSMUSG00000040723	s1	-1.38079	841	2	Cortex	25
ENSMUSG00000026564	s1	-0.524092	841	2	Cortex	9
ENSMUSG00000026566	s1	1.05213	841	2	Cortex	2
ENSMUSG00000026575	s1	0.456441	841	2	Cortex	15
ENSMUSG00000026687	s1	-0.731006	841	2	Cortex	16
ENSMUSG00000005763	s1	-1.36085	841	2	Cortex	1
ENSMUSG00000026558	s1	2.27125	841	2	Cortex	24
ENSMUSG00000026688	s1	0.158108	841	2	Cortex	12
ENSMUSG00000026683	s1	0.688648	841	2	Cortex	23
ENSMUSG00000026678	s1	0.164937	841	2	Cortex	12
ENSMUSG00000052534	s1	2.41442	841	2	Cortex	4
ENSMUSG00000038370	s1	-1.42652	841	2	Cortex	13
ENSMUSG00000058076	s1	-1.15476	841	2	Cortex	17
ENSMUSG00000005674	s1	-0.403995	841	2	Cortex	12
ENSMUSG00000006411	s1	-0.47915	841	2	Cortex	2
ENSMUSG00000045259	s1	0.624538	841	2	Cortex	4
ENSMUSG00000038235	s1	-1.53351	841	2	Cortex	3
ENSMUSG00000060244	s1	0.868503	841	2	Cortex	16
ENSMUSG00000026641	s1	2.17653	841	2	Cortex	2
ENSMUSG00000013593	s1	-0.852894	841	2	Cortex	12
ENSMUSG00000007122	s1	-0.560309	841	2	Cortex	9
ENSMUSG00000044708	s1	0.425889	841	2	Cortex	13
ENSMUSG00000026548	s1	-1.12267	841	2	Cortex	1
ENSMUSG00000026553	s1	0.740923	841	2	Cortex	14
ENSMUSG00000026547	s1	-0.696277	841	2	Cortex	14
ENSMUSG00000013698	s1	1.03083	841	2	Cortex	4
ENSMUSG00000026546	s1	-0.458462	841	2	Cortex	11
ENSMUSG00000038034	s1	1.19667	841	2	Cortex	13
ENSMUSG00000066677	s1	-1.00582	841	2	Cortex	1
ENSMUSG00000050069	s1	-1.71239	841	2	Cortex	15
ENSMUSG00000039748	s1	0.335764	841	2	Cortex	23
ENSMUSG00000026527	s1	1.52379	841	2	Cortex	13
ENSMUSG00000026526	s1	-1.19332	841	2	Cortex	5
ENSMUSG00000037872	s1	1.46978	841	2	Cortex	13
ENSMUSG00000091476	s1	-0.605091	841	2	Cortex	15
ENSMUSG00000026492	s1	0.302403	841	2	Cortex	20
ENSMUSG00000026500	s1	-0.189681	841	2	Cortex	5
ENSMUSG00000039630	s1	1.82717	841	2	Cortex	2
ENSMUSG00000010609	s1	-1.12447	841	2	Cortex	16
ENSMUSG00000038855	s1	-0.907802	841	2	Cortex	11
ENSMUSG00000053963	s1	1.07651	841	2	Cortex	13
ENSMUSG00000058729	s1	0.322954	841	2	Cortex	5
ENSMUSG00000026509	s1	-0.547971	841	2	Cortex	11
ENSMUSG00000039384	s1	-1.11099	841	2	Cortex	9
ENSMUSG00000044854	s1	-1.06227	841	2	Cortex	19
ENSMUSG00000026620	s1	1.90625	841	2	Cortex	13
ENSMUSG00000042901	s1	1.9948	841	2	Cortex	6
ENSMUSG00000026617	s1	-0.378136	841	2	Cortex	10
ENSMUSG00000026614	s1	0.593637	841	2	Cortex	10
ENSMUSG00000039318	s1	-0.354702	841	2	Cortex	8
ENSMUSG00000039246	s1	-0.853244	841	2	Cortex	16
ENSMUSG00000001305	s1	0.0482967	841	2	Cortex	5
ENSMUSG00000026615	s1	0.225583	841	2	Cortex	17
ENSMUSG00000026610	s1	0.458001	841	2	Cortex	12
ENSMUSG00000026608	s1	1.89347	841	2	Cortex	13
ENSMUSG00000010175	s1	0.0778615	841	2	Cortex	16
ENSMUSG00000026628	s1	-1.44117	841	2	Cortex	25
ENSMUSG00000037568	s1	3.26437	841	2	Cortex	21
ENSMUSG00000037499	s1	0.421253	841	2	Cortex	18
ENSMUSG00000037474	s1	0.281635	841	2	Cortex	23
ENSMUSG00000026623	s1	-0.101022	841	2	Cortex	10
ENSMUSG00000026638	s1	-1.25986	841	2	Cortex	22
ENSMUSG00000079144	s1	-0.0541527	841	2	Cortex	5
ENSMUSG00000040653	s1	1.00418	841	2	Cortex	18
ENSMUSG00000040675	s1	0.49913	841	2	Cortex	7
ENSMUSG00000019763	s1	-1.51502	841	2	Cortex	17
ENSMUSG00000046916	s1	-1.15979	841	2	Cortex	3
ENSMUSG00000038587	s1	1.15904	841	2	Cortex	2
ENSMUSG00000064065	s1	0.423936	841	2	Cortex	13
ENSMUSG00000040034	s1	0.337203	841	2	Cortex	5
ENSMUSG00000047712	s1	0.767665	841	2	Cortex	4
ENSMUSG00000060487	s1	1.02266	841	2	Cortex	2
ENSMUSG00000019832	s1	-1.27291	841	2	Cortex	22
ENSMUSG00000050994	s1	-0.810116	841	2	Cortex	1
ENSMUSG00000039232	s1	-0.847191	841	2	Cortex	1
ENSMUSG00000019814	s1	-0.305487	841	2	Cortex	17
ENSMUSG00000019810	s1	-1.32418	841	2	Cortex	6
ENSMUSG00000019806	s1	-0.266811	841	2	Cortex	15
ENSMUSG00000039891	s1	-0.631306	841	2	Cortex	9
ENSMUSG00000039910	s1	0.182974	841	2	Cortex	18
ENSMUSG00000039879	s1	0.0170141	841	2	Cortex	1
ENSMUSG00000020009	s1	-1.53661	841	2	Cortex	1
ENSMUSG00000019992	s1	0.342578	841	2	Cortex	23
ENSMUSG00000097327	s1	-1.24943	841	2	Cortex	22
ENSMUSG00000010461	s1	-0.34569	841	2	Cortex	12
ENSMUSG00000037370	s1	-0.881432	841	2	Cortex	16
ENSMUSG00000019989	s1	-0.708061	841	2	Cortex	16
ENSMUSG00000019987	s1	-0.794113	841	2	Cortex	16
ENSMUSG00000039031	s1	-1.36509	841	2	Cortex	3
ENSMUSG00000019899	s1	-0.464325	841	2	Cortex	18
ENSMUSG00000019978	s1	-0.139296	841	2	Cortex	6
ENSMUSG00000075266	s1	0.612173	841	2	Cortex	23
ENSMUSG00000019883	s1	-0.28852	841	2	Cortex	20
ENSMUSG00000000295	s1	1.31185	841	2	Cortex	21
ENSMUSG00000019791	s1	-1.23254	841	2	Cortex	17
ENSMUSG00000019787	s1	-0.681213	841	2	Cortex	9
ENSMUSG00000019779	s1	-1.11649	841	2	Cortex	22
ENSMUSG00000063953	s1	-0.438833	841	2	Cortex	12
ENSMUSG00000051736	s1	0.488749	841	2	Cortex	8
ENSMUSG00000019845	s1	1.6867	841	2	Cortex	5
ENSMUSG00000069662	s1	1.94416	841	2	Cortex	2
ENSMUSG00000038510	s1	1.99321	841	2	Cortex	24
ENSMUSG00000019837	s1	0.635608	841	2	Cortex	5
ENSMUSG00000075232	s1	-0.239681	841	2	Cortex	12
ENSMUSG00000045555	s1	-0.807193	841	2	Cortex	11
ENSMUSG00000038446	s1	-0.572615	841	2	Cortex	10
ENSMUSG00000019843	s1	2.12437	841	2	Cortex	4
ENSMUSG00000075225	s1	-1.05251	841	2	Cortex	22
ENSMUSG00000038302	s1	-1.9481	841	2	Cortex	17
ENSMUSG00000019823	s1	0.960485	841	2	Cortex	14
ENSMUSG00000019822	s1	-0.59656	841	2	Cortex	3
ENSMUSG00000019802	s1	-1.26113	841	2	Cortex	22
ENSMUSG00000038240	s1	-0.0617504	841	2	Cortex	17
ENSMUSG00000019797	s1	-0.0833005	841	2	Cortex	17
ENSMUSG00000019866	s1	-1.28155	841	2	Cortex	22
ENSMUSG00000038160	s1	-0.968161	841	2	Cortex	16
ENSMUSG00000019891	s1	1.32448	841	2	Cortex	15
ENSMUSG00000112148	s1	-1.56933	841	2	Cortex	1
ENSMUSG00000023068	s1	0.488893	841	2	Cortex	20
ENSMUSG00000038594	s1	-0.380125	841	2	Cortex	20
ENSMUSG00000058298	s1	-0.137201	841	2	Cortex	16
ENSMUSG00000047669	s1	0.955511	841	2	Cortex	4
ENSMUSG00000019876	s1	-0.676648	841	2	Cortex	13
ENSMUSG00000019920	s1	-0.708535	841	2	Cortex	14
ENSMUSG00000098188	s1	0.98463	841	2	Cortex	1
ENSMUSG00000020107	s1	-1.65239	841	2	Cortex	18
ENSMUSG00000044475	s1	-0.925273	841	2	Cortex	25
ENSMUSG00000057337	s1	-0.270147	841	2	Cortex	11
ENSMUSG00000020098	s1	-0.62319	841	2	Cortex	16
ENSMUSG00000012819	s1	-0.392634	841	2	Cortex	12
ENSMUSG00000037171	s1	-0.0489948	841	2	Cortex	10
ENSMUSG00000020092	s1	-0.27622	841	2	Cortex	14
ENSMUSG00000037151	s1	0.0844805	841	2	Cortex	12
ENSMUSG00000020089	s1	0.449519	841	2	Cortex	5
ENSMUSG00000020087	s1	-0.232359	841	2	Cortex	16
ENSMUSG00000058806	s1	-1.00566	841	2	Cortex	3
ENSMUSG00000020085	s1	-1.43013	841	2	Cortex	19
ENSMUSG00000097129	s1	0.984816	841	2	Cortex	13
ENSMUSG00000036923	s1	0.902206	841	2	Cortex	4
ENSMUSG00000036875	s1	-0.709831	841	2	Cortex	22
ENSMUSG00000060843	s1	-0.595256	841	2	Cortex	12
ENSMUSG00000020064	s1	-1.22388	841	2	Cortex	19
ENSMUSG00000020069	s1	1.04894	841	2	Cortex	11
ENSMUSG00000075000	s1	-0.690069	841	2	Cortex	20
ENSMUSG00000037868	s1	0.0879448	841	2	Cortex	4
ENSMUSG00000037012	s1	1.25248	841	2	Cortex	4
ENSMUSG00000037846	s1	-0.288394	841	2	Cortex	11
ENSMUSG00000019947	s1	-0.239632	841	2	Cortex	22
ENSMUSG00000019944	s1	-0.12763	841	2	Cortex	16
ENSMUSG00000019873	s1	-0.606554	841	2	Cortex	22
ENSMUSG00000048701	s1	0.502993	841	2	Cortex	12
ENSMUSG00000037762	s1	-0.821739	841	2	Cortex	11
ENSMUSG00000003923	s1	-0.936903	841	2	Cortex	5
ENSMUSG00000014329	s1	-1.36705	841	2	Cortex	14
ENSMUSG00000037710	s1	-0.572636	841	2	Cortex	17
ENSMUSG00000037747	s1	1.37102	841	2	Cortex	13
ENSMUSG00000019923	s1	0.899779	841	2	Cortex	13
ENSMUSG00000001663	s1	-1.25465	841	2	Cortex	22
ENSMUSG00000033416	s1	-0.882664	841	2	Cortex	19
ENSMUSG00000020196	s1	1.82357	841	2	Cortex	2
ENSMUSG00000033307	s1	1.97361	841	2	Cortex	7
ENSMUSG00000000903	s1	-0.798691	841	2	Cortex	1
ENSMUSG00000050157	s1	-0.578088	841	2	Cortex	1
ENSMUSG00000000902	s1	1.62414	841	2	Cortex	2
ENSMUSG00000001151	s1	-1.80293	841	2	Cortex	25
ENSMUSG00000033208	s1	-0.674962	841	2	Cortex	13
ENSMUSG00000020230	s1	1.73506	841	2	Cortex	6
ENSMUSG00000001436	s1	0.72264	841	2	Cortex	10
ENSMUSG00000001435	s1	-0.811944	841	2	Cortex	16
ENSMUSG00000032977	s1	0.387895	841	2	Cortex	10
ENSMUSG00000051652	s1	0.621059	841	2	Cortex	10
ENSMUSG00000020284	s1	1.05466	841	2	Cortex	13
ENSMUSG00000000732	s1	-1.6812	841	2	Cortex	1
ENSMUSG00000053329	s1	-2.1622	841	2	Cortex	17
ENSMUSG00000020277	s1	-0.126612	841	2	Cortex	7
ENSMUSG00000032834	s1	0.878524	841	2	Cortex	24
ENSMUSG00000032714	s1	-1.14908	841	2	Cortex	11
ENSMUSG00000052151	s1	-0.462566	841	2	Cortex	22
ENSMUSG00000001211	s1	-1.40337	841	2	Cortex	10
ENSMUSG00000061032	s1	0.995596	841	2	Cortex	4
ENSMUSG00000020307	s1	-1.37121	841	2	Cortex	17
ENSMUSG00000020325	s1	-0.453963	841	2	Cortex	11
ENSMUSG00000020329	s1	-0.180709	841	2	Cortex	5
ENSMUSG00000023175	s1	-1.11805	841	2	Cortex	18
ENSMUSG00000035863	s1	1.83814	841	2	Cortex	4
ENSMUSG00000035754	s1	-0.166735	841	2	Cortex	5
ENSMUSG00000004665	s1	-0.753651	841	2	Cortex	14
ENSMUSG00000035781	s1	1.3997	841	2	Cortex	8
ENSMUSG00000097854	s1	0.96806	841	2	Cortex	7
ENSMUSG00000013858	s1	-0.563824	841	2	Cortex	15
ENSMUSG00000045193	s1	1.31209	841	2	Cortex	2
ENSMUSG00000020156	s1	-0.0657651	841	2	Cortex	14
ENSMUSG00000020153	s1	-1.43293	841	2	Cortex	9
ENSMUSG00000035835	s1	2.83536	841	2	Cortex	4
ENSMUSG00000006498	s1	-0.390372	841	2	Cortex	3
ENSMUSG00000057729	s1	0.0511258	841	2	Cortex	23
ENSMUSG00000003068	s1	-1.17382	841	2	Cortex	25
ENSMUSG00000003072	s1	-0.620475	841	2	Cortex	24
ENSMUSG00000020163	s1	-1.5336	841	2	Cortex	17
ENSMUSG00000035397	s1	0.769324	841	2	Cortex	4
ENSMUSG00000047417	s1	1.37492	841	2	Cortex	7
ENSMUSG00000113640	s1	0.0360459	841	2	Cortex	10
ENSMUSG00000020167	s1	0.217257	841	2	Cortex	14
ENSMUSG00000003345	s1	-0.717889	841	2	Cortex	6
ENSMUSG00000020190	s1	-1.02084	841	2	Cortex	25
ENSMUSG00000055862	s1	-0.648082	841	2	Cortex	15
ENSMUSG00000035262	s1	0.676627	841	2	Cortex	24
ENSMUSG00000015312	s1	-1.7546	841	2	Cortex	18
ENSMUSG00000048240	s1	1.48101	841	2	Cortex	13
ENSMUSG00000004929	s1	0.994713	841	2	Cortex	8
ENSMUSG00000034974	s1	0.884013	841	2	Cortex	13
ENSMUSG00000034949	s1	1.12627	841	2	Cortex	13
ENSMUSG00000004939	s1	-0.509439	841	2	Cortex	9
ENSMUSG00000004931	s1	-1.59403	841	2	Cortex	19
ENSMUSG00000004933	s1	1.19229	841	2	Cortex	13
ENSMUSG00000034881	s1	-0.728297	841	2	Cortex	3
ENSMUSG00000020234	s1	-0.740027	841	2	Cortex	11
ENSMUSG00000044199	s1	-1.0185	841	2	Cortex	1
ENSMUSG00000034781	s1	1.34418	841	2	Cortex	15
ENSMUSG00000074862	s1	0.223582	841	2	Cortex	12
ENSMUSG00000112640	s1	-0.125508	841	2	Cortex	17
ENSMUSG00000073427	s1	1.06498	841	2	Cortex	7
ENSMUSG00000063320	s1	-1.38486	841	2	Cortex	5
ENSMUSG00000034612	s1	0.91845	841	2	Cortex	4
ENSMUSG00000034560	s1	0.343932	841	2	Cortex	20
ENSMUSG00000020250	s1	1.19282	841	2	Cortex	19
ENSMUSG00000020263	s1	-1.26788	841	2	Cortex	6
ENSMUSG00000020255	s1	1.25038	841	2	Cortex	10
ENSMUSG00000020038	s1	1.35063	841	2	Cortex	21
ENSMUSG00000001785	s1	1.03486	841	2	Cortex	9
ENSMUSG00000020044	s1	-0.850886	841	2	Cortex	11
ENSMUSG00000035351	s1	-0.436787	841	2	Cortex	19
ENSMUSG00000020053	s1	-0.951202	841	2	Cortex	16
ENSMUSG00000020057	s1	-0.884994	841	2	Cortex	11
ENSMUSG00000020056	s1	-1.61736	841	2	Cortex	19
ENSMUSG00000020061	s1	-0.727638	841	2	Cortex	9
ENSMUSG00000019935	s1	0.175705	841	2	Cortex	10
ENSMUSG00000074802	s1	0.155188	841	2	Cortex	23
ENSMUSG00000019948	s1	0.739529	841	2	Cortex	20
ENSMUSG00000019961	s1	-0.142895	841	2	Cortex	14
ENSMUSG00000020017	s1	-0.76734	841	2	Cortex	16
ENSMUSG00000015889	s1	-0.77632	841	2	Cortex	14
ENSMUSG00000020019	s1	-0.787728	841	2	Cortex	1
ENSMUSG00000020015	s1	1.1757	841	2	Cortex	13
ENSMUSG00000008398	s1	-0.795739	841	2	Cortex	14
ENSMUSG00000058589	s1	1.10436	841	2	Cortex	13
ENSMUSG00000020021	s1	-1.0994	841	2	Cortex	16
ENSMUSG00000005897	s1	-0.366356	841	2	Cortex	20
ENSMUSG00000020022	s1	0.0680611	841	2	Cortex	12
ENSMUSG00000036112	s1	0.813286	841	2	Cortex	21
ENSMUSG00000020023	s1	-1.54388	841	2	Cortex	18
ENSMUSG00000020027	s1	0.556324	841	2	Cortex	3
ENSMUSG00000062981	s1	-0.193345	841	2	Cortex	17
ENSMUSG00000036499	s1	-0.722634	841	2	Cortex	20
ENSMUSG00000036446	s1	-0.852314	841	2	Cortex	21
ENSMUSG00000020029	s1	0.943025	841	2	Cortex	17
ENSMUSG00000019929	s1	-1.4229	841	2	Cortex	25
ENSMUSG00000046934	s1	0.293497	841	2	Cortex	17
ENSMUSG00000019960	s1	-0.635945	841	2	Cortex	15
ENSMUSG00000019966	s1	0.542854	841	2	Cortex	6
ENSMUSG00000044921	s1	-0.325579	841	2	Cortex	11
ENSMUSG00000019943	s1	0.882394	841	2	Cortex	13
ENSMUSG00000036019	s1	-0.432184	841	2	Cortex	3
ENSMUSG00000035916	s1	1.50258	841	2	Cortex	20
ENSMUSG00000035873	s1	-0.891368	841	2	Cortex	22
ENSMUSG00000020186	s1	0.748398	841	2	Cortex	3
ENSMUSG00000020181	s1	2.0544	841	2	Cortex	13
ENSMUSG00000035681	s1	0.759832	841	2	Cortex	13
ENSMUSG00000074748	s1	2.02096	841	2	Cortex	15
ENSMUSG00000069520	s1	-0.796096	841	2	Cortex	16
ENSMUSG00000020140	s1	-0.683676	841	2	Cortex	10
ENSMUSG00000034163	s1	-0.190081	841	2	Cortex	3
ENSMUSG00000069516	s1	-1.3316	841	2	Cortex	1
ENSMUSG00000020212	s1	1.59932	841	2	Cortex	2
ENSMUSG00000034667	s1	0.269859	841	2	Cortex	10
ENSMUSG00000020228	s1	-0.451918	841	2	Cortex	16
ENSMUSG00000034620	s1	-0.126817	841	2	Cortex	9
ENSMUSG00000020123	s1	0.0474776	841	2	Cortex	16
ENSMUSG00000080115	s1	-0.410572	841	2	Cortex	21
ENSMUSG00000006732	s1	-0.970171	841	2	Cortex	5
ENSMUSG00000025432	s1	-0.593735	841	2	Cortex	9
ENSMUSG00000020124	s1	0.0392375	841	2	Cortex	9
ENSMUSG00000040462	s1	-0.288415	841	2	Cortex	15
ENSMUSG00000006731	s1	0.67666	841	2	Cortex	15
ENSMUSG00000040415	s1	1.12955	841	2	Cortex	4
ENSMUSG00000025417	s1	-1.48346	841	2	Cortex	15
ENSMUSG00000074657	s1	1.08503	841	2	Cortex	13
ENSMUSG00000040354	s1	-0.541058	841	2	Cortex	5
ENSMUSG00000025403	s1	-0.444374	841	2	Cortex	16
ENSMUSG00000025401	s1	0.847866	841	2	Cortex	24
ENSMUSG00000099009	s1	-0.598047	841	2	Cortex	16
ENSMUSG00000069456	s1	-0.513097	841	2	Cortex	16
ENSMUSG00000025395	s1	0.880023	841	2	Cortex	23
ENSMUSG00000071072	s1	0.146092	841	2	Cortex	14
ENSMUSG00000025404	s1	0.453994	841	2	Cortex	13
ENSMUSG00000051346	s1	-0.876241	841	2	Cortex	5
ENSMUSG00000039994	s1	-0.887298	841	2	Cortex	3
ENSMUSG00000040033	s1	-0.157098	841	2	Cortex	22
ENSMUSG00000039914	s1	-0.531868	841	2	Cortex	12
ENSMUSG00000005683	s1	0.464996	841	2	Cortex	12
ENSMUSG00000025393	s1	-0.0999219	841	2	Cortex	12
ENSMUSG00000014498	s1	1.42133	841	2	Cortex	24
ENSMUSG00000025366	s1	-1.09426	841	2	Cortex	14
ENSMUSG00000090841	s1	-0.221052	841	2	Cortex	2
ENSMUSG00000025357	s1	-0.993764	841	2	Cortex	1
ENSMUSG00000025352	s1	1.19036	841	2	Cortex	8
ENSMUSG00000025351	s1	-1.0399	841	2	Cortex	14
ENSMUSG00000025347	s1	-0.697754	841	2	Cortex	16
ENSMUSG00000075702	s1	0.480276	841	2	Cortex	4
ENSMUSG00000025354	s1	-0.408879	841	2	Cortex	11
ENSMUSG00000023764	s1	-1.03004	841	2	Cortex	1
ENSMUSG00000020432	s1	-1.99868	841	2	Cortex	3
ENSMUSG00000003581	s1	0.479018	841	2	Cortex	11
ENSMUSG00000034394	s1	-1.10356	841	2	Cortex	14
ENSMUSG00000002129	s1	1.64724	841	2	Cortex	7
ENSMUSG00000020412	s1	-0.428523	841	2	Cortex	3
ENSMUSG00000059534	s1	-1.36874	841	2	Cortex	9
ENSMUSG00000020453	s1	1.12706	841	2	Cortex	6
ENSMUSG00000034614	s1	-0.109362	841	2	Cortex	18
ENSMUSG00000009076	s1	-0.266189	841	2	Cortex	18
ENSMUSG00000034354	s1	0.777698	841	2	Cortex	18
ENSMUSG00000020396	s1	0.00346595	841	2	Cortex	13
ENSMUSG00000034285	s1	0.537403	841	2	Cortex	10
ENSMUSG00000034201	s1	-0.610208	841	2	Cortex	15
ENSMUSG00000041961	s1	0.545076	841	2	Cortex	10
ENSMUSG00000020482	s1	-1.08131	841	2	Cortex	25
ENSMUSG00000020484	s1	-1.1547	841	2	Cortex	3
ENSMUSG00000020475	s1	-0.792515	841	2	Cortex	9
ENSMUSG00000020473	s1	-1.23067	841	2	Cortex	18
ENSMUSG00000020477	s1	-0.99058	841	2	Cortex	19
ENSMUSG00000020471	s1	-0.71452	841	2	Cortex	19
ENSMUSG00000020476	s1	0.531236	841	2	Cortex	2
ENSMUSG00000009079	s1	0.806454	841	2	Cortex	2
ENSMUSG00000034175	s1	-0.622921	841	2	Cortex	17
ENSMUSG00000004393	s1	-0.492353	841	2	Cortex	5
ENSMUSG00000000384	s1	-0.329829	841	2	Cortex	5
ENSMUSG00000071866	s1	1.55038	841	2	Cortex	4
ENSMUSG00000040978	s1	-0.801611	841	2	Cortex	1
ENSMUSG00000050830	s1	0.903139	841	2	Cortex	4
ENSMUSG00000078974	s1	0.546138	841	2	Cortex	23
ENSMUSG00000020122	s1	-0.50041	841	2	Cortex	16
ENSMUSG00000016984	s1	0.0385471	841	2	Cortex	16
ENSMUSG00000000581	s1	-0.0923139	841	2	Cortex	25
ENSMUSG00000033953	s1	0.284474	841	2	Cortex	8
ENSMUSG00000020116	s1	-0.593263	841	2	Cortex	17
ENSMUSG00000020160	s1	-0.93335	841	2	Cortex	11
ENSMUSG00000044066	s1	1.29584	841	2	Cortex	24
ENSMUSG00000049800	s1	-0.0953167	841	2	Cortex	11
ENSMUSG00000049659	s1	0.123216	841	2	Cortex	15
ENSMUSG00000020128	s1	-0.329172	841	2	Cortex	22
ENSMUSG00000020321	s1	-0.387134	841	2	Cortex	24
ENSMUSG00000049811	s1	-0.926616	841	2	Cortex	1
ENSMUSG00000051355	s1	-0.938524	841	2	Cortex	25
ENSMUSG00000020290	s1	1.47184	841	2	Cortex	14
ENSMUSG00000020280	s1	0.355997	841	2	Cortex	5
ENSMUSG00000020464	s1	-0.50533	841	2	Cortex	5
ENSMUSG00000000861	s1	2.05591	841	2	Cortex	13
ENSMUSG00000020462	s1	1.23291	841	2	Cortex	4
ENSMUSG00000032673	s1	-1.38559	841	2	Cortex	19
ENSMUSG00000020458	s1	0.553411	841	2	Cortex	8
ENSMUSG00000040850	s1	-0.629313	841	2	Cortex	17
ENSMUSG00000020303	s1	0.139685	841	2	Cortex	9
ENSMUSG00000020305	s1	-0.307866	841	2	Cortex	17
ENSMUSG00000020309	s1	-0.523806	841	2	Cortex	5
ENSMUSG00000020282	s1	-0.995318	841	2	Cortex	14
ENSMUSG00000069919	s1	-1.24658	841	2	Cortex	14
ENSMUSG00000069917	s1	-1.38483	841	2	Cortex	14
ENSMUSG00000020272	s1	-0.254654	841	2	Cortex	1
ENSMUSG00000020315	s1	0.757317	841	2	Cortex	6
ENSMUSG00000020289	s1	-1.66491	841	2	Cortex	20
ENSMUSG00000057967	s1	0.338303	841	2	Cortex	14
ENSMUSG00000040594	s1	1.81719	841	2	Cortex	7
ENSMUSG00000018848	s1	0.218611	841	2	Cortex	5
ENSMUSG00000057098	s1	0.0151794	841	2	Cortex	21
ENSMUSG00000019189	s1	0.675711	841	2	Cortex	2
ENSMUSG00000069899	s1	-0.864423	841	2	Cortex	22
ENSMUSG00000011254	s1	0.910852	841	2	Cortex	24
ENSMUSG00000011256	s1	1.14946	841	2	Cortex	2
ENSMUSG00000020399	s1	-0.846359	841	2	Cortex	15
ENSMUSG00000020354	s1	-0.277087	841	2	Cortex	9
ENSMUSG00000020340	s1	1.08672	841	2	Cortex	13
ENSMUSG00000040283	s1	-1.09734	841	2	Cortex	5
ENSMUSG00000020357	s1	-0.882772	841	2	Cortex	22
ENSMUSG00000020362	s1	1.67445	841	2	Cortex	2
ENSMUSG00000020376	s1	-0.990461	841	2	Cortex	22
ENSMUSG00000050567	s1	-0.48728	841	2	Cortex	3
ENSMUSG00000020381	s1	0.819683	841	2	Cortex	10
ENSMUSG00000020368	s1	0.967506	841	2	Cortex	15
ENSMUSG00000063564	s1	0.100785	841	2	Cortex	11
ENSMUSG00000020385	s1	-0.430082	841	2	Cortex	18
ENSMUSG00000020386	s1	-0.868644	841	2	Cortex	17
ENSMUSG00000036391	s1	-0.287612	841	2	Cortex	20
ENSMUSG00000007850	s1	2.02779	841	2	Cortex	2
ENSMUSG00000020402	s1	0.174789	841	2	Cortex	12
ENSMUSG00000018239	s1	-0.875253	841	2	Cortex	9
ENSMUSG00000044894	s1	-1.12099	841	2	Cortex	5
ENSMUSG00000063652	s1	-0.265771	841	2	Cortex	25
ENSMUSG00000020334	s1	-0.30431	841	2	Cortex	5
ENSMUSG00000020268	s1	0.030873	841	2	Cortex	12
ENSMUSG00000052298	s1	0.512493	841	2	Cortex	6
ENSMUSG00000018339	s1	-1.18642	841	2	Cortex	18
ENSMUSG00000000594	s1	-1.15346	841	2	Cortex	22
ENSMUSG00000055333	s1	-0.260961	841	2	Cortex	14
ENSMUSG00000020261	s1	-0.362411	841	2	Cortex	10
ENSMUSG00000020523	s1	-0.488492	841	2	Cortex	25
ENSMUSG00000037275	s1	0.540327	841	2	Cortex	24
ENSMUSG00000056895	s1	2.22342	841	2	Cortex	4
ENSMUSG00000049287	s1	-0.530616	841	2	Cortex	5
ENSMUSG00000061462	s1	-0.60029	841	2	Cortex	9
ENSMUSG00000036860	s1	-1.07211	841	2	Cortex	17
ENSMUSG00000020444	s1	-0.264819	841	2	Cortex	6
ENSMUSG00000020441	s1	0.149171	841	2	Cortex	15
ENSMUSG00000048076	s1	0.698322	841	2	Cortex	4
ENSMUSG00000061650	s1	-0.327453	841	2	Cortex	8
ENSMUSG00000000301	s1	-0.505573	841	2	Cortex	16
ENSMUSG00000020537	s1	-0.749769	841	2	Cortex	10
ENSMUSG00000042709	s1	-0.583605	841	2	Cortex	5
ENSMUSG00000042569	s1	-2.02794	841	2	Cortex	19
ENSMUSG00000049323	s1	-0.436257	841	2	Cortex	20
ENSMUSG00000020534	s1	-0.633585	841	2	Cortex	16
ENSMUSG00000002812	s1	0.179983	841	2	Cortex	25
ENSMUSG00000043284	s1	-0.741906	841	2	Cortex	17
ENSMUSG00000018931	s1	1.41467	841	2	Cortex	14
ENSMUSG00000018932	s1	-1.58133	841	2	Cortex	25
ENSMUSG00000019102	s1	-0.429719	841	2	Cortex	11
ENSMUSG00000001039	s1	-0.13027	841	2	Cortex	6
ENSMUSG00000004837	s1	-0.878573	841	2	Cortex	1
ENSMUSG00000020528	s1	2.10626	841	2	Cortex	15
ENSMUSG00000014243	s1	-1.21004	841	2	Cortex	17
ENSMUSG00000042331	s1	-0.100661	841	2	Cortex	4
ENSMUSG00000070407	s1	-0.621966	841	2	Cortex	16
ENSMUSG00000018217	s1	-1.08598	841	2	Cortex	14
ENSMUSG00000047342	s1	1.93212	841	2	Cortex	8
ENSMUSG00000047759	s1	-1.16827	841	2	Cortex	10
ENSMUSG00000042148	s1	-0.029587	841	2	Cortex	12
ENSMUSG00000019505	s1	1.06737	841	2	Cortex	4
ENSMUSG00000056328	s1	-0.595662	841	2	Cortex	9
ENSMUSG00000056752	s1	0.399073	841	2	Cortex	11
ENSMUSG00000020549	s1	0.276864	841	2	Cortex	5
ENSMUSG00000033044	s1	-0.646017	841	2	Cortex	9
ENSMUSG00000033066	s1	1.61121	841	2	Cortex	13
ENSMUSG00000018736	s1	0.587993	841	2	Cortex	8
ENSMUSG00000052921	s1	-0.932455	841	2	Cortex	11
ENSMUSG00000032892	s1	-0.236946	841	2	Cortex	9
ENSMUSG00000020899	s1	0.396892	841	2	Cortex	12
ENSMUSG00000020895	s1	-0.0508233	841	2	Cortex	2
ENSMUSG00000020898	s1	1.75859	841	2	Cortex	7
ENSMUSG00000020892	s1	1.29083	841	2	Cortex	7
ENSMUSG00000020894	s1	0.951882	841	2	Cortex	4
ENSMUSG00000049299	s1	0.0634659	841	2	Cortex	21
ENSMUSG00000045377	s1	-1.47872	841	2	Cortex	14
ENSMUSG00000018752	s1	-1.59308	841	2	Cortex	1
ENSMUSG00000097328	s1	-1.80805	841	2	Cortex	3
ENSMUSG00000005204	s1	1.50395	841	2	Cortex	2
ENSMUSG00000005198	s1	0.574765	841	2	Cortex	2
ENSMUSG00000042298	s1	0.305168	841	2	Cortex	24
ENSMUSG00000001588	s1	-0.983921	841	2	Cortex	1
ENSMUSG00000018570	s1	1.63723	841	2	Cortex	21
ENSMUSG00000019461	s1	-0.233165	841	2	Cortex	14
ENSMUSG00000001583	s1	-0.932468	841	2	Cortex	11
ENSMUSG00000018569	s1	-0.70569	841	2	Cortex	11
ENSMUSG00000018554	s1	0.846622	841	2	Cortex	12
ENSMUSG00000018566	s1	-0.613248	841	2	Cortex	9
ENSMUSG00000018567	s1	0.0810255	841	2	Cortex	3
ENSMUSG00000018572	s1	0.459264	841	2	Cortex	2
ENSMUSG00000044367	s1	1.46705	841	2	Cortex	15
ENSMUSG00000040938	s1	-0.843697	841	2	Cortex	15
ENSMUSG00000000317	s1	0.117748	841	2	Cortex	14
ENSMUSG00000046811	s1	-0.589021	841	2	Cortex	16
ENSMUSG00000018920	s1	-1.31016	841	2	Cortex	1
ENSMUSG00000040904	s1	-0.462908	841	2	Cortex	19
ENSMUSG00000018286	s1	1.42469	841	2	Cortex	21
ENSMUSG00000014609	s1	-0.725574	841	2	Cortex	9
ENSMUSG00000014606	s1	-1.54572	841	2	Cortex	9
ENSMUSG00000040746	s1	-1.93232	841	2	Cortex	1
ENSMUSG00000060600	s1	-0.88459	841	2	Cortex	9
ENSMUSG00000018446	s1	0.784321	841	2	Cortex	5
ENSMUSG00000040620	s1	1.23911	841	2	Cortex	24
ENSMUSG00000040599	s1	-0.253077	841	2	Cortex	22
ENSMUSG00000020803	s1	-0.401467	841	2	Cortex	3
ENSMUSG00000040471	s1	-0.779249	841	2	Cortex	16
ENSMUSG00000020799	s1	0.21982	841	2	Cortex	11
ENSMUSG00000020807	s1	1.80618	841	2	Cortex	13
ENSMUSG00000020788	s1	-1.13774	841	2	Cortex	1
ENSMUSG00000005947	s1	-0.914136	841	2	Cortex	1
ENSMUSG00000047260	s1	-0.733413	841	2	Cortex	19
ENSMUSG00000040158	s1	0.260275	841	2	Cortex	3
ENSMUSG00000005951	s1	-0.953042	841	2	Cortex	16
ENSMUSG00000005949	s1	-0.857933	841	2	Cortex	16
ENSMUSG00000040667	s1	1.72538	841	2	Cortex	21
ENSMUSG00000038807	s1	0.8878	841	2	Cortex	13
ENSMUSG00000010554	s1	0.308118	841	2	Cortex	20
ENSMUSG00000043099	s1	-1.01762	841	2	Cortex	14
ENSMUSG00000045287	s1	0.43115	841	2	Cortex	13
ENSMUSG00000078789	s1	-0.874282	841	2	Cortex	5
ENSMUSG00000038217	s1	-1.08726	841	2	Cortex	16
ENSMUSG00000038188	s1	-1.47226	841	2	Cortex	3
ENSMUSG00000038178	s1	-0.157924	841	2	Cortex	6
ENSMUSG00000006127	s1	-0.751769	841	2	Cortex	18
ENSMUSG00000017774	s1	-0.852359	841	2	Cortex	3
ENSMUSG00000017781	s1	1.1417	841	2	Cortex	4
ENSMUSG00000038335	s1	1.13803	841	2	Cortex	24
ENSMUSG00000001323	s1	0.493471	841	2	Cortex	10
ENSMUSG00000020846	s1	0.0311398	841	2	Cortex	14
ENSMUSG00000020838	s1	0.503262	841	2	Cortex	3
ENSMUSG00000017631	s1	1.36443	841	2	Cortex	4
ENSMUSG00000017286	s1	-0.531641	841	2	Cortex	22
ENSMUSG00000069808	s1	0.634051	841	2	Cortex	2
ENSMUSG00000038057	s1	0.640244	841	2	Cortex	10
ENSMUSG00000038046	s1	-0.454214	841	2	Cortex	17
ENSMUSG00000037857	s1	-0.0949448	841	2	Cortex	20
ENSMUSG00000072673	s1	-0.281553	841	2	Cortex	16
ENSMUSG00000000686	s1	-0.924651	841	2	Cortex	16
ENSMUSG00000017453	s1	-0.386941	841	2	Cortex	16
ENSMUSG00000037791	s1	0.2947	841	2	Cortex	15
ENSMUSG00000020832	s1	-0.653725	841	2	Cortex	17
ENSMUSG00000061981	s1	0.981149	841	2	Cortex	8
ENSMUSG00000017405	s1	-0.944678	841	2	Cortex	3
ENSMUSG00000002059	s1	0.405165	841	2	Cortex	14
ENSMUSG00000037593	s1	-0.73995	841	2	Cortex	13
ENSMUSG00000002052	s1	0.400713	841	2	Cortex	13
ENSMUSG00000017390	s1	0.526132	841	2	Cortex	13
ENSMUSG00000017615	s1	0.0315796	841	2	Cortex	18
ENSMUSG00000001105	s1	-1.13347	841	2	Cortex	3
ENSMUSG00000001123	s1	-1.44184	841	2	Cortex	22
ENSMUSG00000018334	s1	0.279668	841	2	Cortex	8
ENSMUSG00000049612	s1	0.431513	841	2	Cortex	13
ENSMUSG00000017639	s1	1.27639	841	2	Cortex	13
ENSMUSG00000046909	s1	-0.984944	841	2	Cortex	17
ENSMUSG00000017692	s1	-0.334532	841	2	Cortex	8
ENSMUSG00000057181	s1	0.67889	841	2	Cortex	12
ENSMUSG00000035441	s1	-1.51186	841	2	Cortex	1
ENSMUSG00000020676	s1	-0.889162	841	2	Cortex	9
ENSMUSG00000035385	s1	-1.1407	841	2	Cortex	19
ENSMUSG00000046010	s1	-0.781214	841	2	Cortex	19
ENSMUSG00000048895	s1	1.9983	841	2	Cortex	13
ENSMUSG00000020698	s1	-0.152026	841	2	Cortex	16
ENSMUSG00000018841	s1	0.328146	841	2	Cortex	10
ENSMUSG00000069793	s1	-0.032664	841	2	Cortex	23
ENSMUSG00000000204	s1	-0.800276	841	2	Cortex	1
ENSMUSG00000018844	s1	-0.371618	841	2	Cortex	8
ENSMUSG00000020692	s1	0.296291	841	2	Cortex	12
ENSMUSG00000054404	s1	-1.27979	841	2	Cortex	1
ENSMUSG00000020697	s1	0.826104	841	2	Cortex	20
ENSMUSG00000035085	s1	-0.464604	841	2	Cortex	11
ENSMUSG00000020682	s1	-0.502076	841	2	Cortex	11
ENSMUSG00000051748	s1	-1.03342	841	2	Cortex	16
ENSMUSG00000018648	s1	-1.16809	841	2	Cortex	6
ENSMUSG00000018733	s1	-0.539541	841	2	Cortex	20
ENSMUSG00000018697	s1	0.705151	841	2	Cortex	5
ENSMUSG00000000093	s1	-0.890559	841	2	Cortex	11
ENSMUSG00000000094	s1	-0.65094	841	2	Cortex	11
ENSMUSG00000034329	s1	-0.0428727	841	2	Cortex	23
ENSMUSG00000072582	s1	0.388153	841	2	Cortex	5
ENSMUSG00000020516	s1	1.04464	841	2	Cortex	24
ENSMUSG00000018425	s1	-1.18825	841	2	Cortex	19
ENSMUSG00000020492	s1	2.50141	841	2	Cortex	7
ENSMUSG00000047126	s1	0.528994	841	2	Cortex	4
ENSMUSG00000007646	s1	0.730657	841	2	Cortex	23
ENSMUSG00000046442	s1	1.35826	841	2	Cortex	13
ENSMUSG00000034177	s1	-1.0443	841	2	Cortex	22
ENSMUSG00000034156	s1	1.39377	841	2	Cortex	13
ENSMUSG00000023723	s1	-0.768947	841	2	Cortex	9
ENSMUSG00000018379	s1	1.59713	841	2	Cortex	2
ENSMUSG00000000275	s1	-1.39033	841	2	Cortex	22
ENSMUSG00000018428	s1	0.312812	841	2	Cortex	5
ENSMUSG00000110344	s1	-0.0525815	841	2	Cortex	5
ENSMUSG00000003948	s1	0.749708	841	2	Cortex	10
ENSMUSG00000020544	s1	-0.763549	841	2	Cortex	17
ENSMUSG00000020857	s1	0.646155	841	2	Cortex	25
ENSMUSG00000037601	s1	1.56752	841	2	Cortex	7
ENSMUSG00000044177	s1	-0.427773	841	2	Cortex	12
ENSMUSG00000039110	s1	-0.564732	841	2	Cortex	11
ENSMUSG00000076435	s1	-1.12533	841	2	Cortex	16
ENSMUSG00000020870	s1	-0.406034	841	2	Cortex	17
ENSMUSG00000001506	s1	-0.795555	841	2	Cortex	14
ENSMUSG00000001507	s1	-0.250195	841	2	Cortex	11
ENSMUSG00000038976	s1	0.848284	841	2	Cortex	4
ENSMUSG00000000120	s1	-0.00704796	841	2	Cortex	23
ENSMUSG00000020866	s1	1.51294	841	2	Cortex	13
ENSMUSG00000057522	s1	-1.16792	841	2	Cortex	18
ENSMUSG00000038845	s1	-0.173809	841	2	Cortex	5
ENSMUSG00000006058	s1	0.0777679	841	2	Cortex	10
ENSMUSG00000014349	s1	0.700295	841	2	Cortex	2
ENSMUSG00000006057	s1	-0.827848	841	2	Cortex	9
ENSMUSG00000020876	s1	0.679387	841	2	Cortex	6
ENSMUSG00000038560	s1	-0.594734	841	2	Cortex	14
ENSMUSG00000020877	s1	-0.706675	841	2	Cortex	19
ENSMUSG00000001444	s1	-0.701765	841	2	Cortex	8
ENSMUSG00000038517	s1	0.937437	841	2	Cortex	6
ENSMUSG00000018882	s1	-0.508902	841	2	Cortex	17
ENSMUSG00000038615	s1	-1.42342	841	2	Cortex	18
ENSMUSG00000018669	s1	0.0610588	841	2	Cortex	16
ENSMUSG00000049807	s1	1.31177	841	2	Cortex	4
ENSMUSG00000078695	s1	-2.01548	841	2	Cortex	17
ENSMUSG00000050538	s1	0.884423	841	2	Cortex	13
ENSMUSG00000038366	s1	1.59611	841	2	Cortex	15
ENSMUSG00000017400	s1	0.533179	841	2	Cortex	13
ENSMUSG00000062312	s1	-0.724537	841	2	Cortex	14
ENSMUSG00000038150	s1	0.236756	841	2	Cortex	16
ENSMUSG00000017404	s1	0.874531	841	2	Cortex	2
ENSMUSG00000017499	s1	-0.107793	841	2	Cortex	23
ENSMUSG00000037992	s1	-0.895802	841	2	Cortex	3
ENSMUSG00000037944	s1	-0.79718	841	2	Cortex	1
ENSMUSG00000035849	s1	0.1562	841	2	Cortex	13
ENSMUSG00000006930	s1	0.187184	841	2	Cortex	13
ENSMUSG00000035530	s1	-1.19631	841	2	Cortex	18
ENSMUSG00000001552	s1	-0.444312	841	2	Cortex	11
ENSMUSG00000020918	s1	1.81154	841	2	Cortex	13
ENSMUSG00000020917	s1	1.17085	841	2	Cortex	15
ENSMUSG00000020919	s1	-1.66773	841	2	Cortex	17
ENSMUSG00000019173	s1	1.03504	841	2	Cortex	2
ENSMUSG00000004044	s1	-1.11385	841	2	Cortex	14
ENSMUSG00000001755	s1	-0.63217	841	2	Cortex	16
ENSMUSG00000017801	s1	0.401619	841	2	Cortex	16
ENSMUSG00000035198	s1	0.472762	841	2	Cortex	24
ENSMUSG00000017167	s1	-0.788797	841	2	Cortex	13
ENSMUSG00000019302	s1	0.747174	841	2	Cortex	13
ENSMUSG00000001240	s1	-0.563093	841	2	Cortex	11
ENSMUSG00000075528	s1	0.685019	841	2	Cortex	12
ENSMUSG00000017146	s1	-0.0501819	841	2	Cortex	23
ENSMUSG00000034993	s1	0.633942	841	2	Cortex	11
ENSMUSG00000034947	s1	-1.471	841	2	Cortex	22
ENSMUSG00000010362	s1	-1.6477	841	2	Cortex	25
ENSMUSG00000034936	s1	-0.301523	841	2	Cortex	1
ENSMUSG00000017724	s1	1.45086	841	2	Cortex	8
ENSMUSG00000034793	s1	-1.08659	841	2	Cortex	12
ENSMUSG00000020922	s1	0.421379	841	2	Cortex	17
ENSMUSG00000034768	s1	-0.60685	841	2	Cortex	9
ENSMUSG00000008855	s1	0.168502	841	2	Cortex	6
ENSMUSG00000020923	s1	1.1271	841	2	Cortex	2
ENSMUSG00000051455	s1	0.108123	841	2	Cortex	12
ENSMUSG00000020925	s1	-0.236569	841	2	Cortex	12
ENSMUSG00000034520	s1	1.43696	841	2	Cortex	14
ENSMUSG00000020941	s1	-0.995524	841	2	Cortex	25
ENSMUSG00000055805	s1	-0.0985591	841	2	Cortex	4
ENSMUSG00000020929	s1	0.236086	841	2	Cortex	2
ENSMUSG00000020935	s1	2.2841	841	2	Cortex	7
ENSMUSG00000020936	s1	-1.44518	841	2	Cortex	8
ENSMUSG00000034187	s1	0.453483	841	2	Cortex	13
ENSMUSG00000020689	s1	-0.860135	841	2	Cortex	14
ENSMUSG00000001983	s1	-0.904421	841	2	Cortex	17
ENSMUSG00000040699	s1	0.266646	841	2	Cortex	15
ENSMUSG00000069631	s1	0.630155	841	2	Cortex	8
ENSMUSG00000020706	s1	-0.208212	841	2	Cortex	5
ENSMUSG00000040592	s1	-1.05794	841	2	Cortex	1
ENSMUSG00000001029	s1	-0.860573	841	2	Cortex	11
ENSMUSG00000078619	s1	-1.40246	841	2	Cortex	3
ENSMUSG00000020715	s1	-0.817018	841	2	Cortex	16
ENSMUSG00000020717	s1	-0.981555	841	2	Cortex	11
ENSMUSG00000020718	s1	-0.209079	841	2	Cortex	19
ENSMUSG00000018363	s1	0.38671	841	2	Cortex	3
ENSMUSG00000078607	s1	-0.604772	841	2	Cortex	11
ENSMUSG00000018433	s1	1.0548	841	2	Cortex	5
ENSMUSG00000020722	s1	-0.532303	841	2	Cortex	9
ENSMUSG00000020719	s1	1.38807	841	2	Cortex	6
ENSMUSG00000020723	s1	2.79426	841	2	Cortex	13
ENSMUSG00000020728	s1	0.978026	841	2	Cortex	21
ENSMUSG00000020611	s1	-1.0573	841	2	Cortex	14
ENSMUSG00000020604	s1	-0.937751	841	2	Cortex	16
ENSMUSG00000020612	s1	0.718789	841	2	Cortex	4
ENSMUSG00000041623	s1	2.56716	841	2	Cortex	21
ENSMUSG00000041598	s1	0.423285	841	2	Cortex	3
ENSMUSG00000041592	s1	1.43699	841	2	Cortex	13
ENSMUSG00000034714	s1	-0.804384	841	2	Cortex	16
ENSMUSG00000010021	s1	-1.32152	841	2	Cortex	11
ENSMUSG00000034706	s1	-0.263375	841	2	Cortex	11
ENSMUSG00000051043	s1	-1.46786	841	2	Cortex	19
ENSMUSG00000047798	s1	-1.11132	841	2	Cortex	1
ENSMUSG00000020733	s1	-0.928208	841	2	Cortex	22
ENSMUSG00000020734	s1	-0.487823	841	2	Cortex	13
ENSMUSG00000018858	s1	-1.70902	841	2	Cortex	25
ENSMUSG00000016940	s1	-0.658165	841	2	Cortex	6
ENSMUSG00000034566	s1	-0.906613	841	2	Cortex	12
ENSMUSG00000020781	s1	0.00418865	841	2	Cortex	25
ENSMUSG00000034471	s1	-1.3335	841	2	Cortex	11
ENSMUSG00000020766	s1	-0.322439	841	2	Cortex	22
ENSMUSG00000048442	s1	-0.97972	841	2	Cortex	14
ENSMUSG00000057948	s1	-0.890185	841	2	Cortex	1
ENSMUSG00000020770	s1	1.00061	841	2	Cortex	2
ENSMUSG00000054517	s1	-1.40123	841	2	Cortex	19
ENSMUSG00000016559	s1	1.3817	841	2	Cortex	2
ENSMUSG00000046756	s1	-0.847705	841	2	Cortex	5
ENSMUSG00000020793	s1	0.066288	841	2	Cortex	12
ENSMUSG00000020776	s1	1.756	841	2	Cortex	4
ENSMUSG00000020778	s1	0.480482	841	2	Cortex	6
ENSMUSG00000020792	s1	1.13363	841	2	Cortex	12
ENSMUSG00000061878	s1	-0.752133	841	2	Cortex	14
ENSMUSG00000015869	s1	0.611281	841	2	Cortex	22
ENSMUSG00000020814	s1	-0.584464	841	2	Cortex	11
ENSMUSG00000052949	s1	1.39603	841	2	Cortex	13
ENSMUSG00000020823	s1	0.445717	841	2	Cortex	6
ENSMUSG00000053113	s1	-1.18211	841	2	Cortex	3
ENSMUSG00000017713	s1	-1.51581	841	2	Cortex	19
ENSMUSG00000025572	s1	-1.63613	841	2	Cortex	3
ENSMUSG00000025574	s1	-0.777352	841	2	Cortex	23
ENSMUSG00000017715	s1	-0.296169	841	2	Cortex	6
ENSMUSG00000056962	s1	-0.315006	841	2	Cortex	19
ENSMUSG00000034120	s1	1.89618	841	2	Cortex	2
ENSMUSG00000090266	s1	-0.904105	841	2	Cortex	9
ENSMUSG00000020818	s1	0.111346	841	2	Cortex	12
ENSMUSG00000017466	s1	0.40788	841	2	Cortex	6
ENSMUSG00000025578	s1	0.227199	841	2	Cortex	10
ENSMUSG00000039989	s1	0.571923	841	2	Cortex	15
ENSMUSG00000039963	s1	0.632597	841	2	Cortex	11
ENSMUSG00000039908	s1	-1.23928	841	2	Cortex	19
ENSMUSG00000013483	s1	-0.312678	841	2	Cortex	17
ENSMUSG00000025580	s1	0.770967	841	2	Cortex	14
ENSMUSG00000070327	s1	-1.38746	841	2	Cortex	3
ENSMUSG00000039850	s1	1.29303	841	2	Cortex	7
ENSMUSG00000025377	s1	0.929244	841	2	Cortex	10
ENSMUSG00000025375	s1	1.06406	841	2	Cortex	13
ENSMUSG00000025384	s1	2.25998	841	2	Cortex	21
ENSMUSG00000025127	s1	-0.603362	841	2	Cortex	16
ENSMUSG00000039640	s1	-0.69142	841	2	Cortex	5
ENSMUSG00000025792	s1	-1.22082	841	2	Cortex	22
ENSMUSG00000061111	s1	0.594415	841	2	Cortex	2
ENSMUSG00000025130	s1	-0.89207	841	2	Cortex	22
ENSMUSG00000025135	s1	1.07559	841	2	Cortex	6
ENSMUSG00000025140	s1	0.637675	841	2	Cortex	21
ENSMUSG00000025132	s1	0.605275	841	2	Cortex	2
ENSMUSG00000025138	s1	-0.666439	841	2	Cortex	22
ENSMUSG00000025144	s1	-0.501819	841	2	Cortex	22
ENSMUSG00000025145	s1	0.421763	841	2	Cortex	2
ENSMUSG00000025142	s1	-0.736826	841	2	Cortex	22
ENSMUSG00000025150	s1	-0.921105	841	2	Cortex	11
ENSMUSG00000025161	s1	-0.938471	841	2	Cortex	9
ENSMUSG00000000056	s1	0.2981	841	2	Cortex	17
ENSMUSG00000039238	s1	-0.95872	841	2	Cortex	16
ENSMUSG00000020661	s1	1.3763	841	2	Cortex	21
ENSMUSG00000037486	s1	0.0902045	841	2	Cortex	20
ENSMUSG00000096199	s1	-0.201669	841	2	Cortex	17
ENSMUSG00000020652	s1	-0.506759	841	2	Cortex	19
ENSMUSG00000020639	s1	1.07587	841	2	Cortex	13
ENSMUSG00000051721	s1	-0.383691	841	2	Cortex	20
ENSMUSG00000052812	s1	1.66176	841	2	Cortex	20
ENSMUSG00000037669	s1	0.892125	841	2	Cortex	10
ENSMUSG00000054364	s1	0.614129	841	2	Cortex	6
ENSMUSG00000020585	s1	-0.960706	841	2	Cortex	14
ENSMUSG00000020621	s1	-1.47605	841	2	Cortex	17
ENSMUSG00000043673	s1	0.0560499	841	2	Cortex	11
ENSMUSG00000051235	s1	0.852821	841	2	Cortex	5
ENSMUSG00000037149	s1	1.22758	841	2	Cortex	24
ENSMUSG00000020607	s1	1.59238	841	2	Cortex	4
ENSMUSG00000020601	s1	1.15799	841	2	Cortex	6
ENSMUSG00000020593	s1	-0.731014	841	2	Cortex	20
ENSMUSG00000057469	s1	-0.965595	841	2	Cortex	9
ENSMUSG00000071398	s1	-0.334568	841	2	Cortex	11
ENSMUSG00000045679	s1	-1.21331	841	2	Cortex	1
ENSMUSG00000020580	s1	-0.638595	841	2	Cortex	8
ENSMUSG00000061458	s1	0.764375	841	2	Cortex	24
ENSMUSG00000071379	s1	-0.837736	841	2	Cortex	11
ENSMUSG00000062054	s1	-0.768435	841	2	Cortex	22
ENSMUSG00000020653	s1	0.781606	841	2	Cortex	3
ENSMUSG00000076432	s1	1.95429	841	2	Cortex	4
ENSMUSG00000020644	s1	1.18909	841	2	Cortex	15
ENSMUSG00000020642	s1	0.336502	841	2	Cortex	11
ENSMUSG00000036655	s1	-0.651121	841	2	Cortex	16
ENSMUSG00000020628	s1	-0.147916	841	2	Cortex	13
ENSMUSG00000020664	s1	-0.666032	841	2	Cortex	17
ENSMUSG00000002900	s1	-0.219852	841	2	Cortex	14
ENSMUSG00000020648	s1	-0.50161	841	2	Cortex	20
ENSMUSG00000020650	s1	-1.21723	841	2	Cortex	12
ENSMUSG00000002996	s1	-1.61339	841	2	Cortex	25
ENSMUSG00000035860	s1	-0.920752	841	2	Cortex	11
ENSMUSG00000019256	s1	-0.642092	841	2	Cortex	22
ENSMUSG00000004698	s1	0.99091	841	2	Cortex	13
ENSMUSG00000020577	s1	0.70474	841	2	Cortex	6
ENSMUSG00000091007	s1	-0.976535	841	2	Cortex	22
ENSMUSG00000043153	s1	0.798464	841	2	Cortex	24
ENSMUSG00000002565	s1	-0.581945	841	2	Cortex	9
ENSMUSG00000020547	s1	2.33903	841	2	Cortex	21
ENSMUSG00000001627	s1	0.535578	841	2	Cortex	18
ENSMUSG00000036257	s1	-0.263196	841	2	Cortex	20
ENSMUSG00000046314	s1	-0.0701897	841	2	Cortex	7
ENSMUSG00000021047	s1	1.20456	841	2	Cortex	8
ENSMUSG00000002688	s1	0.609346	841	2	Cortex	6
ENSMUSG00000020953	s1	1.06985	841	2	Cortex	13
ENSMUSG00000020952	s1	-0.973689	841	2	Cortex	22
ENSMUSG00000020956	s1	-1.2224	841	2	Cortex	16
ENSMUSG00000035181	s1	-0.354066	841	2	Cortex	25
ENSMUSG00000035247	s1	0.203224	841	2	Cortex	20
ENSMUSG00000035105	s1	0.053587	841	2	Cortex	5
ENSMUSG00000021010	s1	1.9713	841	2	Cortex	13
ENSMUSG00000044408	s1	-0.17165	841	2	Cortex	3
ENSMUSG00000073079	s1	-0.14375	841	2	Cortex	12
ENSMUSG00000112449	s1	0.788526	841	2	Cortex	24
ENSMUSG00000021023	s1	-0.431774	841	2	Cortex	5
ENSMUSG00000021025	s1	-1.51763	841	2	Cortex	1
ENSMUSG00000001497	s1	-0.793809	841	2	Cortex	19
ENSMUSG00000001496	s1	-0.500839	841	2	Cortex	11
ENSMUSG00000045930	s1	-0.917317	841	2	Cortex	11
ENSMUSG00000047022	s1	-0.133167	841	2	Cortex	20
ENSMUSG00000020994	s1	1.7811	841	2	Cortex	2
ENSMUSG00000020974	s1	0.0403314	841	2	Cortex	23
ENSMUSG00000043998	s1	-0.118463	841	2	Cortex	22
ENSMUSG00000020949	s1	0.888396	841	2	Cortex	8
ENSMUSG00000020988	s1	-0.614922	841	2	Cortex	17
ENSMUSG00000054894	s1	-0.891237	841	2	Cortex	12
ENSMUSG00000021069	s1	-1.28281	841	2	Cortex	22
ENSMUSG00000021072	s1	0.745248	841	2	Cortex	23
ENSMUSG00000021079	s1	-0.0402139	841	2	Cortex	17
ENSMUSG00000060073	s1	-0.0210087	841	2	Cortex	25
ENSMUSG00000019718	s1	-0.0669952	841	2	Cortex	16
ENSMUSG00000051367	s1	-0.721773	841	2	Cortex	9
ENSMUSG00000034442	s1	-0.779001	841	2	Cortex	17
ENSMUSG00000021108	s1	-0.288168	841	2	Cortex	11
ENSMUSG00000046768	s1	-0.95172	841	2	Cortex	14
ENSMUSG00000045690	s1	-0.805395	841	2	Cortex	19
ENSMUSG00000021087	s1	1.70414	841	2	Cortex	13
ENSMUSG00000056459	s1	0.846462	841	2	Cortex	12
ENSMUSG00000052221	s1	-0.492506	841	2	Cortex	11
ENSMUSG00000021061	s1	0.109446	841	2	Cortex	12
ENSMUSG00000090258	s1	-1.62326	841	2	Cortex	25
ENSMUSG00000021065	s1	0.817721	841	2	Cortex	6
ENSMUSG00000021112	s1	-0.790441	841	2	Cortex	18
ENSMUSG00000021114	s1	-0.120852	841	2	Cortex	8
ENSMUSG00000021116	s1	-0.452756	841	2	Cortex	25
ENSMUSG00000021120	s1	-0.274422	841	2	Cortex	1
ENSMUSG00000021124	s1	0.789321	841	2	Cortex	13
ENSMUSG00000066441	s1	0.759998	841	2	Cortex	10
ENSMUSG00000021127	s1	-1.53577	841	2	Cortex	3
ENSMUSG00000015143	s1	-0.684018	841	2	Cortex	2
ENSMUSG00000021136	s1	-0.22609	841	2	Cortex	16
ENSMUSG00000021134	s1	0.0363927	841	2	Cortex	2
ENSMUSG00000042724	s1	1.95092	841	2	Cortex	4
ENSMUSG00000021139	s1	-0.993187	841	2	Cortex	17
ENSMUSG00000091803	s1	-1.03868	841	2	Cortex	25
ENSMUSG00000072974	s1	-0.462255	841	2	Cortex	20
ENSMUSG00000042700	s1	-0.153639	841	2	Cortex	13
ENSMUSG00000021222	s1	0.748807	841	2	Cortex	12
ENSMUSG00000042628	s1	-0.797835	841	2	Cortex	20
ENSMUSG00000043487	s1	-0.0278738	841	2	Cortex	12
ENSMUSG00000021226	s1	-1.29741	841	2	Cortex	25
ENSMUSG00000072949	s1	0.0550135	841	2	Cortex	3
ENSMUSG00000072946	s1	-2.28048	841	2	Cortex	17
ENSMUSG00000042472	s1	-0.246291	841	2	Cortex	25
ENSMUSG00000021242	s1	-1.04027	841	2	Cortex	11
ENSMUSG00000008822	s1	-1.71044	841	2	Cortex	9
ENSMUSG00000034290	s1	-1.35683	841	2	Cortex	25
ENSMUSG00000004789	s1	-0.744512	841	2	Cortex	17
ENSMUSG00000034271	s1	-0.964064	841	2	Cortex	6
ENSMUSG00000021257	s1	0.799494	841	2	Cortex	24
ENSMUSG00000021032	s1	0.121101	841	2	Cortex	15
ENSMUSG00000034145	s1	1.37786	841	2	Cortex	13
ENSMUSG00000021037	s1	0.752406	841	2	Cortex	12
ENSMUSG00000021036	s1	-0.190728	841	2	Cortex	3
ENSMUSG00000021044	s1	0.292674	841	2	Cortex	24
ENSMUSG00000007682	s1	0.580591	841	2	Cortex	13
ENSMUSG00000047414	s1	2.03874	841	2	Cortex	4
ENSMUSG00000020964	s1	0.367311	841	2	Cortex	10
ENSMUSG00000021176	s1	1.13049	841	2	Cortex	23
ENSMUSG00000021185	s1	-1.32038	841	2	Cortex	20
ENSMUSG00000021182	s1	1.21444	841	2	Cortex	18
ENSMUSG00000021189	s1	-0.45863	841	2	Cortex	22
ENSMUSG00000041846	s1	-0.715663	841	2	Cortex	22
ENSMUSG00000021188	s1	-0.626784	841	2	Cortex	20
ENSMUSG00000044456	s1	-1.29049	841	2	Cortex	3
ENSMUSG00000041781	s1	2.07006	841	2	Cortex	24
ENSMUSG00000001175	s1	0.800612	841	2	Cortex	4
ENSMUSG00000041669	s1	-0.617996	841	2	Cortex	12
ENSMUSG00000021200	s1	-1.03894	841	2	Cortex	9
ENSMUSG00000055271	s1	1.22152	841	2	Cortex	12
ENSMUSG00000091931	s1	0.619701	841	2	Cortex	5
ENSMUSG00000046675	s1	-0.167127	841	2	Cortex	5
ENSMUSG00000060807	s1	-0.561761	841	2	Cortex	16
ENSMUSG00000041323	s1	-0.377787	841	2	Cortex	11
ENSMUSG00000041341	s1	-0.229087	841	2	Cortex	5
ENSMUSG00000048251	s1	2.03387	841	2	Cortex	13
ENSMUSG00000021259	s1	0.658427	841	2	Cortex	13
ENSMUSG00000021264	s1	1.39753	841	2	Cortex	10
ENSMUSG00000040856	s1	-0.481689	841	2	Cortex	23
ENSMUSG00000021262	s1	1.99212	841	2	Cortex	4
ENSMUSG00000021276	s1	0.142986	841	2	Cortex	13
ENSMUSG00000037904	s1	-0.942369	841	2	Cortex	12
ENSMUSG00000021275	s1	0.808512	841	2	Cortex	8
ENSMUSG00000021279	s1	0.301255	841	2	Cortex	2
ENSMUSG00000007411	s1	1.34426	841	2	Cortex	14
ENSMUSG00000060950	s1	0.160781	841	2	Cortex	24
ENSMUSG00000037787	s1	-1.34326	841	2	Cortex	17
ENSMUSG00000001270	s1	0.861717	841	2	Cortex	4
ENSMUSG00000021290	s1	-0.183596	841	2	Cortex	9
ENSMUSG00000021294	s1	2.10356	841	2	Cortex	2
ENSMUSG00000054013	s1	1.14186	841	2	Cortex	13
ENSMUSG00000064326	s1	-0.816024	841	2	Cortex	14
ENSMUSG00000021288	s1	1.38557	841	2	Cortex	4
ENSMUSG00000002804	s1	-1.3542	841	2	Cortex	3
ENSMUSG00000006360	s1	-1.2274	841	2	Cortex	14
ENSMUSG00000049036	s1	1.81113	841	2	Cortex	13
ENSMUSG00000006356	s1	1.0502	841	2	Cortex	2
ENSMUSG00000011171	s1	-0.134034	841	2	Cortex	6
ENSMUSG00000021171	s1	-1.10646	841	2	Cortex	18
ENSMUSG00000018581	s1	-0.50525	841	2	Cortex	11
ENSMUSG00000025321	s1	1.67456	841	2	Cortex	13
ENSMUSG00000071551	s1	0.164792	841	2	Cortex	16
ENSMUSG00000000078	s1	1.00733	841	2	Cortex	11
ENSMUSG00000033499	s1	-0.306429	841	2	Cortex	17
ENSMUSG00000021193	s1	-0.00547904	841	2	Cortex	5
ENSMUSG00000021311	s1	-0.931655	841	2	Cortex	9
ENSMUSG00000057069	s1	-0.691653	841	2	Cortex	16
ENSMUSG00000021313	s1	0.979689	841	2	Cortex	13
ENSMUSG00000021306	s1	0.286021	841	2	Cortex	6
ENSMUSG00000057554	s1	-1.61212	841	2	Cortex	19
ENSMUSG00000019726	s1	0.384543	841	2	Cortex	10
ENSMUSG00000021303	s1	1.30367	841	2	Cortex	13
ENSMUSG00000015672	s1	-0.298415	841	2	Cortex	5
ENSMUSG00000002808	s1	-0.287979	841	2	Cortex	8
ENSMUSG00000003062	s1	-0.0348531	841	2	Cortex	11
ENSMUSG00000041112	s1	1.00706	841	2	Cortex	4
ENSMUSG00000059395	s1	-0.331589	841	2	Cortex	22
ENSMUSG00000078139	s1	-0.808298	841	2	Cortex	17
ENSMUSG00000021327	s1	-0.397566	841	2	Cortex	3
ENSMUSG00000060639	s1	-1.07893	841	2	Cortex	9
ENSMUSG00000051627	s1	-0.416268	841	2	Cortex	17
ENSMUSG00000036110	s1	-0.65194	841	2	Cortex	16
ENSMUSG00000021338	s1	0.968536	841	2	Cortex	15
ENSMUSG00000006717	s1	-1.71721	841	2	Cortex	17
ENSMUSG00000019132	s1	1.31447	841	2	Cortex	2
ENSMUSG00000036006	s1	0.440906	841	2	Cortex	8
ENSMUSG00000021339	s1	-0.377652	841	2	Cortex	20
ENSMUSG00000035910	s1	0.00287315	841	2	Cortex	15
ENSMUSG00000048978	s1	0.524856	841	2	Cortex	13
ENSMUSG00000038462	s1	-1.10005	841	2	Cortex	9
ENSMUSG00000038732	s1	0.711668	841	2	Cortex	14
ENSMUSG00000090863	s1	0.056995	841	2	Cortex	16
ENSMUSG00000038415	s1	-0.156973	841	2	Cortex	16
ENSMUSG00000076431	s1	3.02227	841	2	Cortex	2
ENSMUSG00000044734	s1	-1.97973	841	2	Cortex	3
ENSMUSG00000042842	s1	-0.702251	841	2	Cortex	11
ENSMUSG00000021400	s1	0.294765	841	2	Cortex	15
ENSMUSG00000060147	s1	-1.10963	841	2	Cortex	18
ENSMUSG00000021411	s1	-1.19984	841	2	Cortex	3
ENSMUSG00000021414	s1	-0.705191	841	2	Cortex	4
ENSMUSG00000021416	s1	-0.491534	841	2	Cortex	16
ENSMUSG00000021418	s1	-0.516189	841	2	Cortex	5
ENSMUSG00000021420	s1	-1.20069	841	2	Cortex	19
ENSMUSG00000039109	s1	-0.656015	841	2	Cortex	9
ENSMUSG00000021417	s1	-0.879715	841	2	Cortex	19
ENSMUSG00000044566	s1	1.33918	841	2	Cortex	13
ENSMUSG00000021428	s1	0.868977	841	2	Cortex	14
ENSMUSG00000021431	s1	-0.973448	841	2	Cortex	19
ENSMUSG00000039004	s1	-0.833631	841	2	Cortex	11
ENSMUSG00000038982	s1	-1.10342	841	2	Cortex	16
ENSMUSG00000001707	s1	2.39542	841	2	Cortex	24
ENSMUSG00000021364	s1	0.3594	841	2	Cortex	10
ENSMUSG00000021365	s1	-0.093818	841	2	Cortex	11
ENSMUSG00000058022	s1	-0.875879	841	2	Cortex	16
ENSMUSG00000021367	s1	-0.998864	841	2	Cortex	11
ENSMUSG00000063200	s1	0.31257	841	2	Cortex	25
ENSMUSG00000057531	s1	0.565799	841	2	Cortex	13
ENSMUSG00000021373	s1	-0.167835	841	2	Cortex	8
ENSMUSG00000021375	s1	-0.263259	841	2	Cortex	18
ENSMUSG00000021379	s1	0.952024	841	2	Cortex	4
ENSMUSG00000021376	s1	-0.220886	841	2	Cortex	16
ENSMUSG00000038080	s1	1.31908	841	2	Cortex	20
ENSMUSG00000037960	s1	-2.01344	841	2	Cortex	25
ENSMUSG00000021391	s1	0.687694	841	2	Cortex	21
ENSMUSG00000021390	s1	-0.902498	841	2	Cortex	18
ENSMUSG00000037851	s1	0.321077	841	2	Cortex	17
ENSMUSG00000035139	s1	-0.603557	841	2	Cortex	20
ENSMUSG00000047842	s1	0.982914	841	2	Cortex	13
ENSMUSG00000021451	s1	0.0191546	841	2	Cortex	8
ENSMUSG00000056749	s1	0.435227	841	2	Cortex	5
ENSMUSG00000021460	s1	-1.69412	841	2	Cortex	20
ENSMUSG00000034987	s1	0.537652	841	2	Cortex	13
ENSMUSG00000021474	s1	0.944335	841	2	Cortex	10
ENSMUSG00000025872	s1	0.869047	841	2	Cortex	10
ENSMUSG00000025869	s1	0.591475	841	2	Cortex	5
ENSMUSG00000025873	s1	-0.19826	841	2	Cortex	10
ENSMUSG00000052087	s1	-0.87469	841	2	Cortex	4
ENSMUSG00000021485	s1	0.28084	841	2	Cortex	23
ENSMUSG00000034686	s1	1.5881	841	2	Cortex	13
ENSMUSG00000021494	s1	0.178864	841	2	Cortex	10
ENSMUSG00000021495	s1	-0.804947	841	2	Cortex	15
ENSMUSG00000021497	s1	-1.33803	841	2	Cortex	16
ENSMUSG00000021509	s1	-0.685605	841	2	Cortex	16
ENSMUSG00000021540	s1	1.0802	841	2	Cortex	14
ENSMUSG00000050002	s1	-0.742578	841	2	Cortex	22
ENSMUSG00000060176	s1	0.722557	841	2	Cortex	6
ENSMUSG00000055254	s1	1.30877	841	2	Cortex	13
ENSMUSG00000021556	s1	-0.418755	841	2	Cortex	18
ENSMUSG00000044792	s1	-0.98217	841	2	Cortex	12
ENSMUSG00000074874	s1	-1.46022	841	2	Cortex	1
ENSMUSG00000050345	s1	-0.783188	841	2	Cortex	1
ENSMUSG00000044258	s1	-0.906855	841	2	Cortex	11
ENSMUSG00000072066	s1	2.04774	841	2	Cortex	21
ENSMUSG00000069805	s1	-0.757171	841	2	Cortex	16
ENSMUSG00000033114	s1	-0.936417	841	2	Cortex	16
ENSMUSG00000038212	s1	-0.992402	841	2	Cortex	15
ENSMUSG00000100235	s1	-1.52487	841	2	Cortex	16
ENSMUSG00000057842	s1	-0.946197	841	2	Cortex	20
ENSMUSG00000098905	s1	-0.46274	841	2	Cortex	16
ENSMUSG00000078995	s1	-0.477986	841	2	Cortex	22
ENSMUSG00000021520	s1	-0.990628	841	2	Cortex	9
ENSMUSG00000021519	s1	-0.762213	841	2	Cortex	19
ENSMUSG00000034617	s1	-0.567861	841	2	Cortex	17
ENSMUSG00000021598	s1	2.27008	841	2	Cortex	7
ENSMUSG00000021594	s1	0.316854	841	2	Cortex	10
ENSMUSG00000021595	s1	0.105682	841	2	Cortex	10
ENSMUSG00000060969	s1	-0.777962	841	2	Cortex	11
ENSMUSG00000049538	s1	1.39907	841	2	Cortex	8
ENSMUSG00000021606	s1	-0.691645	841	2	Cortex	17
ENSMUSG00000017756	s1	-0.915805	841	2	Cortex	22
ENSMUSG00000021608	s1	0.541735	841	2	Cortex	11
ENSMUSG00000021567	s1	1.83089	841	2	Cortex	2
ENSMUSG00000021573	s1	0.161253	841	2	Cortex	13
ENSMUSG00000021575	s1	1.56969	841	2	Cortex	7
ENSMUSG00000034152	s1	1.56818	841	2	Cortex	24
ENSMUSG00000021576	s1	-1.03493	841	2	Cortex	22
ENSMUSG00000057649	s1	2.03041	841	2	Cortex	4
ENSMUSG00000062382	s1	-0.336547	841	2	Cortex	16
ENSMUSG00000021578	s1	0.322579	841	2	Cortex	12
ENSMUSG00000021577	s1	-1.87714	841	2	Cortex	17
ENSMUSG00000021585	s1	-1.73824	841	2	Cortex	25
ENSMUSG00000035840	s1	-0.110332	841	2	Cortex	20
ENSMUSG00000074794	s1	-0.522911	841	2	Cortex	3
ENSMUSG00000069170	s1	0.93669	841	2	Cortex	10
ENSMUSG00000021537	s1	1.68576	841	2	Cortex	2
ENSMUSG00000017778	s1	-0.384355	841	2	Cortex	9
ENSMUSG00000021548	s1	0.402459	841	2	Cortex	24
ENSMUSG00000049517	s1	0.24221	841	2	Cortex	14
ENSMUSG00000021702	s1	-0.701772	841	2	Cortex	21
ENSMUSG00000021703	s1	-0.619232	841	2	Cortex	15
ENSMUSG00000021620	s1	-0.589491	841	2	Cortex	16
ENSMUSG00000014850	s1	1.08004	841	2	Cortex	24
ENSMUSG00000007617	s1	0.775871	841	2	Cortex	8
ENSMUSG00000042015	s1	0.522331	841	2	Cortex	12
ENSMUSG00000021678	s1	-1.07134	841	2	Cortex	11
ENSMUSG00000021681	s1	-0.547232	841	2	Cortex	15
ENSMUSG00000048376	s1	-0.249481	841	2	Cortex	3
ENSMUSG00000114133	s1	0.35045	841	2	Cortex	20
ENSMUSG00000021668	s1	-0.535068	841	2	Cortex	17
ENSMUSG00000091387	s1	-0.376595	841	2	Cortex	10
ENSMUSG00000021666	s1	-0.618135	841	2	Cortex	17
ENSMUSG00000021665	s1	-0.831251	841	2	Cortex	4
ENSMUSG00000005583	s1	1.72551	841	2	Cortex	8
ENSMUSG00000092116	s1	-0.202317	841	2	Cortex	16
ENSMUSG00000041685	s1	-0.55498	841	2	Cortex	1
ENSMUSG00000021650	s1	-0.42083	841	2	Cortex	17
ENSMUSG00000041632	s1	-0.114995	841	2	Cortex	5
ENSMUSG00000021646	s1	-0.870003	841	2	Cortex	16
ENSMUSG00000021640	s1	-0.424463	841	2	Cortex	16
ENSMUSG00000021638	s1	-0.886241	841	2	Cortex	22
ENSMUSG00000021636	s1	-1.02832	841	2	Cortex	22
ENSMUSG00000021639	s1	-0.117942	841	2	Cortex	9
ENSMUSG00000048924	s1	-0.977268	841	2	Cortex	22
ENSMUSG00000045273	s1	0.736596	841	2	Cortex	23
ENSMUSG00000021629	s1	-0.817446	841	2	Cortex	22
ENSMUSG00000078941	s1	2.43406	841	2	Cortex	21
ENSMUSG00000052293	s1	1.42204	841	2	Cortex	7
ENSMUSG00000021714	s1	0.323303	841	2	Cortex	23
ENSMUSG00000068184	s1	0.928384	841	2	Cortex	5
ENSMUSG00000021692	s1	1.3877	841	2	Cortex	24
ENSMUSG00000021759	s1	-1.14216	841	2	Cortex	14
ENSMUSG00000042379	s1	-0.865338	841	2	Cortex	1
ENSMUSG00000021760	s1	-0.603511	841	2	Cortex	14
ENSMUSG00000021764	s1	-0.798955	841	2	Cortex	9
ENSMUSG00000042284	s1	-0.807995	841	2	Cortex	3
ENSMUSG00000042275	s1	-0.988859	841	2	Cortex	16
ENSMUSG00000021728	s1	-0.852717	841	2	Cortex	11
ENSMUSG00000021730	s1	0.802304	841	2	Cortex	13
ENSMUSG00000021731	s1	-0.48025	841	2	Cortex	5
ENSMUSG00000021732	s1	0.681259	841	2	Cortex	6
ENSMUSG00000074635	s1	1.10848	841	2	Cortex	7
ENSMUSG00000074634	s1	1.49553	841	2	Cortex	24
ENSMUSG00000025279	s1	-0.727073	841	2	Cortex	16
ENSMUSG00000025278	s1	-1.21421	841	2	Cortex	22
ENSMUSG00000023156	s1	-0.536337	841	2	Cortex	12
ENSMUSG00000033885	s1	-0.101077	841	2	Cortex	1
ENSMUSG00000021748	s1	-0.693269	841	2	Cortex	17
ENSMUSG00000097148	s1	-0.569175	841	2	Cortex	20
ENSMUSG00000056296	s1	0.913707	841	2	Cortex	13
ENSMUSG00000068758	s1	-1.0341	841	2	Cortex	3
ENSMUSG00000045201	s1	1.473	841	2	Cortex	13
ENSMUSG00000021786	s1	-0.788417	841	2	Cortex	20
ENSMUSG00000021775	s1	-1.66498	841	2	Cortex	20
ENSMUSG00000023243	s1	-0.909761	841	2	Cortex	16
ENSMUSG00000021809	s1	-1.1167	841	2	Cortex	17
ENSMUSG00000021810	s1	-0.49867	841	2	Cortex	17
ENSMUSG00000039599	s1	0.210256	841	2	Cortex	20
ENSMUSG00000043004	s1	2.6667	841	2	Cortex	4
ENSMUSG00000068697	s1	-0.683637	841	2	Cortex	9
ENSMUSG00000039376	s1	-0.638624	841	2	Cortex	9
ENSMUSG00000063787	s1	0.793975	841	2	Cortex	9
ENSMUSG00000039357	s1	0.72956	841	2	Cortex	2
ENSMUSG00000021822	s1	-1.07273	841	2	Cortex	9
ENSMUSG00000021824	s1	0.783238	841	2	Cortex	16
ENSMUSG00000021771	s1	0.0569465	841	2	Cortex	12
ENSMUSG00000025280	s1	0.487885	841	2	Cortex	10
ENSMUSG00000021868	s1	-1.10501	841	2	Cortex	5
ENSMUSG00000040717	s1	0.15381	841	2	Cortex	11
ENSMUSG00000021895	s1	-1.42304	841	2	Cortex	15
ENSMUSG00000043702	s1	1.23728	841	2	Cortex	20
ENSMUSG00000045776	s1	-0.857328	841	2	Cortex	17
ENSMUSG00000042682	s1	0.957038	841	2	Cortex	1
ENSMUSG00000021918	s1	0.597066	841	2	Cortex	10
ENSMUSG00000006527	s1	0.0865848	841	2	Cortex	10
ENSMUSG00000042354	s1	0.0057615	841	2	Cortex	5
ENSMUSG00000071547	s1	0.60192	841	2	Cortex	14
ENSMUSG00000042323	s1	2.32752	841	2	Cortex	21
ENSMUSG00000058351	s1	-1.54499	841	2	Cortex	25
ENSMUSG00000021904	s1	-0.808112	841	2	Cortex	11
ENSMUSG00000021902	s1	-0.949388	841	2	Cortex	19
ENSMUSG00000019027	s1	-0.282805	841	2	Cortex	6
ENSMUSG00000014496	s1	0.312959	841	2	Cortex	24
ENSMUSG00000021900	s1	-0.918279	841	2	Cortex	16
ENSMUSG00000021893	s1	1.16105	841	2	Cortex	17
ENSMUSG00000021906	s1	0.0651817	841	2	Cortex	5
ENSMUSG00000013701	s1	-0.000313544	841	2	Cortex	17
ENSMUSG00000021913	s1	0.733198	841	2	Cortex	13
ENSMUSG00000050666	s1	-0.843424	841	2	Cortex	14
ENSMUSG00000041471	s1	-0.658675	841	2	Cortex	16
ENSMUSG00000041445	s1	-1.39908	841	2	Cortex	25
ENSMUSG00000021798	s1	-0.699605	841	2	Cortex	9
ENSMUSG00000041078	s1	1.08008	841	2	Cortex	13
ENSMUSG00000021910	s1	1.15224	841	2	Cortex	2
ENSMUSG00000049235	s1	1.0814	841	2	Cortex	10
ENSMUSG00000062014	s1	0.94085	841	2	Cortex	6
ENSMUSG00000050335	s1	-1.40373	841	2	Cortex	14
ENSMUSG00000021840	s1	0.688669	841	2	Cortex	16
ENSMUSG00000006288	s1	0.586295	841	2	Cortex	2
ENSMUSG00000090799	s1	-0.553893	841	2	Cortex	12
ENSMUSG00000006281	s1	-1.5666	841	2	Cortex	19
ENSMUSG00000006289	s1	-0.530987	841	2	Cortex	25
ENSMUSG00000021880	s1	-0.949145	841	2	Cortex	1
ENSMUSG00000035960	s1	1.95782	841	2	Cortex	24
ENSMUSG00000035726	s1	2.11226	841	2	Cortex	23
ENSMUSG00000004562	s1	0.0319732	841	2	Cortex	14
ENSMUSG00000049295	s1	-0.793318	841	2	Cortex	3
ENSMUSG00000022159	s1	1.77232	841	2	Cortex	13
ENSMUSG00000022160	s1	-0.230899	841	2	Cortex	12
ENSMUSG00000010406	s1	-0.127573	841	2	Cortex	3
ENSMUSG00000000959	s1	-0.337434	841	2	Cortex	17
ENSMUSG00000022175	s1	-1.16094	841	2	Cortex	3
ENSMUSG00000022177	s1	-0.695127	841	2	Cortex	23
ENSMUSG00000022178	s1	-0.835726	841	2	Cortex	3
ENSMUSG00000022179	s1	-0.247121	841	2	Cortex	5
ENSMUSG00000022193	s1	-0.627293	841	2	Cortex	9
ENSMUSG00000052435	s1	-0.712803	841	2	Cortex	16
ENSMUSG00000022180	s1	0.545613	841	2	Cortex	8
ENSMUSG00000022203	s1	0.839253	841	2	Cortex	21
ENSMUSG00000022194	s1	1.92744	841	2	Cortex	2
ENSMUSG00000022185	s1	1.57395	841	2	Cortex	2
ENSMUSG00000002324	s1	0.8475	841	2	Cortex	15
ENSMUSG00000002325	s1	-1.16113	841	2	Cortex	22
ENSMUSG00000002326	s1	0.0588519	841	2	Cortex	15
ENSMUSG00000010376	s1	1.86651	841	2	Cortex	2
ENSMUSG00000040432	s1	-0.797428	841	2	Cortex	16
ENSMUSG00000022220	s1	-1.07774	841	2	Cortex	11
ENSMUSG00000019297	s1	-0.188757	841	2	Cortex	19
ENSMUSG00000023411	s1	-0.25328	841	2	Cortex	14
ENSMUSG00000040380	s1	0.290269	841	2	Cortex	16
ENSMUSG00000047153	s1	-0.941596	841	2	Cortex	22
ENSMUSG00000061068	s1	-0.661397	841	2	Cortex	21
ENSMUSG00000022223	s1	-1.17357	841	2	Cortex	12
ENSMUSG00000021938	s1	2.68079	841	2	Cortex	13
ENSMUSG00000046352	s1	-0.638176	841	2	Cortex	16
ENSMUSG00000021967	s1	-0.6036	841	2	Cortex	5
ENSMUSG00000021973	s1	-0.251212	841	2	Cortex	19
ENSMUSG00000021974	s1	0.448642	841	2	Cortex	13
ENSMUSG00000021952	s1	0.518848	841	2	Cortex	20
ENSMUSG00000091144	s1	-0.523561	841	2	Cortex	16
ENSMUSG00000044461	s1	-0.0912896	841	2	Cortex	9
ENSMUSG00000035469	s1	-0.369108	841	2	Cortex	16
ENSMUSG00000021983	s1	1.64351	841	2	Cortex	13
ENSMUSG00000021993	s1	-0.74574	841	2	Cortex	17
ENSMUSG00000021990	s1	-0.131184	841	2	Cortex	22
ENSMUSG00000060548	s1	0.968213	841	2	Cortex	6
ENSMUSG00000043157	s1	-1.40645	841	2	Cortex	1
ENSMUSG00000021928	s1	-0.215952	841	2	Cortex	16
ENSMUSG00000048279	s1	1.56023	841	2	Cortex	8
ENSMUSG00000021929	s1	0.733326	841	2	Cortex	12
ENSMUSG00000035161	s1	-0.0813669	841	2	Cortex	10
ENSMUSG00000014547	s1	0.550221	841	2	Cortex	20
ENSMUSG00000021958	s1	1.3416	841	2	Cortex	23
ENSMUSG00000063060	s1	-0.431532	841	2	Cortex	11
ENSMUSG00000060012	s1	-0.219012	841	2	Cortex	20
ENSMUSG00000022035	s1	-1.08587	841	2	Cortex	5
ENSMUSG00000022043	s1	0.837282	841	2	Cortex	18
ENSMUSG00000059456	s1	0.214705	841	2	Cortex	13
ENSMUSG00000022048	s1	1.80974	841	2	Cortex	6
ENSMUSG00000015812	s1	-0.32408	841	2	Cortex	21
ENSMUSG00000044447	s1	-1.0015	841	2	Cortex	22
ENSMUSG00000014813	s1	1.50037	841	2	Cortex	2
ENSMUSG00000022054	s1	1.07246	841	2	Cortex	13
ENSMUSG00000022066	s1	-0.620963	841	2	Cortex	17
ENSMUSG00000095463	s1	-0.472724	841	2	Cortex	17
ENSMUSG00000033730	s1	0.388385	841	2	Cortex	13
ENSMUSG00000044551	s1	0.13313	841	2	Cortex	11
ENSMUSG00000022090	s1	-1.38055	841	2	Cortex	11
ENSMUSG00000022091	s1	-1.97209	841	2	Cortex	1
ENSMUSG00000000776	s1	1.34698	841	2	Cortex	24
ENSMUSG00000033589	s1	-1.04091	841	2	Cortex	3
ENSMUSG00000047911	s1	0.648189	841	2	Cortex	9
ENSMUSG00000022099	s1	1.10521	841	2	Cortex	13
ENSMUSG00000022108	s1	-1.83449	841	2	Cortex	15
ENSMUSG00000068015	s1	-0.393303	841	2	Cortex	11
ENSMUSG00000033405	s1	-0.118393	841	2	Cortex	17
ENSMUSG00000021998	s1	-1.28335	841	2	Cortex	3
ENSMUSG00000021996	s1	-1.00988	841	2	Cortex	22
ENSMUSG00000022003	s1	-0.00210453	841	2	Cortex	20
ENSMUSG00000034893	s1	-0.699927	841	2	Cortex	3
ENSMUSG00000067995	s1	1.43898	841	2	Cortex	5
ENSMUSG00000022009	s1	0.871224	841	2	Cortex	5
ENSMUSG00000044350	s1	-1.11287	841	2	Cortex	16
ENSMUSG00000022013	s1	-1.25841	841	2	Cortex	17
ENSMUSG00000022018	s1	-0.693387	841	2	Cortex	18
ENSMUSG00000022022	s1	-0.635697	841	2	Cortex	17
ENSMUSG00000075502	s1	2.16257	841	2	Cortex	7
ENSMUSG00000055639	s1	0.522111	841	2	Cortex	6
ENSMUSG00000022070	s1	0.355747	841	2	Cortex	23
ENSMUSG00000098557	s1	1.47852	841	2	Cortex	2
ENSMUSG00000033060	s1	-0.664805	841	2	Cortex	11
ENSMUSG00000022120	s1	2.89973	841	2	Cortex	8
ENSMUSG00000022122	s1	0.614879	841	2	Cortex	2
ENSMUSG00000058571	s1	0.772287	841	2	Cortex	23
ENSMUSG00000022132	s1	-0.449879	841	2	Cortex	6
ENSMUSG00000032849	s1	-0.726524	841	2	Cortex	17
ENSMUSG00000022136	s1	-1.40359	841	2	Cortex	22
ENSMUSG00000042156	s1	2.24137	841	2	Cortex	4
ENSMUSG00000030662	s1	1.58961	841	2	Cortex	12
ENSMUSG00000022149	s1	-0.537382	841	2	Cortex	16
ENSMUSG00000022146	s1	-0.990595	841	2	Cortex	1
ENSMUSG00000022186	s1	0.967353	841	2	Cortex	8
ENSMUSG00000022144	s1	-0.482506	841	2	Cortex	11
ENSMUSG00000039676	s1	-0.536507	841	2	Cortex	11
ENSMUSG00000072663	s1	-0.171117	841	2	Cortex	11
ENSMUSG00000054115	s1	1.35551	841	2	Cortex	23
ENSMUSG00000044224	s1	-0.921714	841	2	Cortex	17
ENSMUSG00000047497	s1	0.0632296	841	2	Cortex	21
ENSMUSG00000022246	s1	-0.350554	841	2	Cortex	3
ENSMUSG00000022241	s1	-0.365888	841	2	Cortex	16
ENSMUSG00000039458	s1	-1.09295	841	2	Cortex	15
ENSMUSG00000022195	s1	-0.413848	841	2	Cortex	12
ENSMUSG00000022197	s1	0.488457	841	2	Cortex	6
ENSMUSG00000022201	s1	1.28377	841	2	Cortex	13
ENSMUSG00000022321	s1	1.88982	841	2	Cortex	13
ENSMUSG00000022191	s1	1.71815	841	2	Cortex	8
ENSMUSG00000046034	s1	-0.91589	841	2	Cortex	16
ENSMUSG00000056069	s1	-0.649351	841	2	Cortex	6
ENSMUSG00000022265	s1	0.212062	841	2	Cortex	12
ENSMUSG00000045763	s1	1.94542	841	2	Cortex	4
ENSMUSG00000022262	s1	0.197869	841	2	Cortex	11
ENSMUSG00000039168	s1	-1.15226	841	2	Cortex	22
ENSMUSG00000022236	s1	-0.63144	841	2	Cortex	16
ENSMUSG00000039065	s1	-1.36738	841	2	Cortex	19
ENSMUSG00000038879	s1	-0.272615	841	2	Cortex	11
ENSMUSG00000022325	s1	0.627251	841	2	Cortex	5
ENSMUSG00000045996	s1	-0.708598	841	2	Cortex	9
ENSMUSG00000022280	s1	-0.702085	841	2	Cortex	3
ENSMUSG00000037646	s1	-0.135175	841	2	Cortex	10
ENSMUSG00000014313	s1	-0.471056	841	2	Cortex	12
ENSMUSG00000022285	s1	1.45893	841	2	Cortex	4
ENSMUSG00000022295	s1	0.0461564	841	2	Cortex	13
ENSMUSG00000022297	s1	-0.584808	841	2	Cortex	11
ENSMUSG00000022299	s1	-0.688201	841	2	Cortex	20
ENSMUSG00000051359	s1	1.13036	841	2	Cortex	4
ENSMUSG00000022309	s1	0.0162986	841	2	Cortex	18
ENSMUSG00000022307	s1	-1.07017	841	2	Cortex	13
ENSMUSG00000022337	s1	-0.78281	841	2	Cortex	12
ENSMUSG00000038736	s1	-0.25816	841	2	Cortex	5
ENSMUSG00000038679	s1	-0.191314	841	2	Cortex	8
ENSMUSG00000068522	s1	-0.323379	841	2	Cortex	11
ENSMUSG00000037343	s1	1.7803	841	2	Cortex	24
ENSMUSG00000060429	s1	-1.47994	841	2	Cortex	16
ENSMUSG00000022367	s1	2.44635	841	2	Cortex	21
ENSMUSG00000022358	s1	-0.521025	841	2	Cortex	12
ENSMUSG00000101892	s1	-0.278881	841	2	Cortex	24
ENSMUSG00000022354	s1	-0.752249	841	2	Cortex	12
ENSMUSG00000022353	s1	1.65501	841	2	Cortex	16
ENSMUSG00000022350	s1	1.17974	841	2	Cortex	20
ENSMUSG00000022347	s1	-0.46473	841	2	Cortex	16
ENSMUSG00000072568	s1	0.0560687	841	2	Cortex	1
ENSMUSG00000022351	s1	1.78219	841	2	Cortex	10
ENSMUSG00000015002	s1	-0.338744	841	2	Cortex	8
ENSMUSG00000056258	s1	1.45542	841	2	Cortex	13
ENSMUSG00000022335	s1	0.691431	841	2	Cortex	24
ENSMUSG00000079022	s1	-0.24058	841	2	Cortex	21
ENSMUSG00000053469	s1	-0.0988962	841	2	Cortex	1
ENSMUSG00000059895	s1	-0.469967	841	2	Cortex	18
ENSMUSG00000022595	s1	-0.538221	841	2	Cortex	11
ENSMUSG00000046380	s1	2.12276	841	2	Cortex	8
ENSMUSG00000022594	s1	-0.812068	841	2	Cortex	8
ENSMUSG00000079018	s1	-1.15101	841	2	Cortex	18
ENSMUSG00000022579	s1	-1.52282	841	2	Cortex	25
ENSMUSG00000000934	s1	-0.0541856	841	2	Cortex	5
ENSMUSG00000098678	s1	-0.669635	841	2	Cortex	16
ENSMUSG00000022577	s1	1.71946	841	2	Cortex	13
ENSMUSG00000022571	s1	0.307307	841	2	Cortex	16
ENSMUSG00000022570	s1	-0.502163	841	2	Cortex	19
ENSMUSG00000034429	s1	-0.682507	841	2	Cortex	16
ENSMUSG00000063704	s1	0.279011	841	2	Cortex	22
ENSMUSG00000046761	s1	-0.801619	841	2	Cortex	22
ENSMUSG00000055762	s1	-0.75893	841	2	Cortex	25
ENSMUSG00000002524	s1	1.18958	841	2	Cortex	2
ENSMUSG00000022564	s1	0.256463	841	2	Cortex	13
ENSMUSG00000071724	s1	0.655422	841	2	Cortex	11
ENSMUSG00000022551	s1	-0.820417	841	2	Cortex	17
ENSMUSG00000022553	s1	-0.428867	841	2	Cortex	18
ENSMUSG00000022557	s1	1.63884	841	2	Cortex	24
ENSMUSG00000022550	s1	-0.889513	841	2	Cortex	16
ENSMUSG00000053929	s1	-0.984623	841	2	Cortex	18
ENSMUSG00000022546	s1	-1.37341	841	2	Cortex	16
ENSMUSG00000019080	s1	-0.82179	841	2	Cortex	5
ENSMUSG00000033762	s1	0.0412085	841	2	Cortex	23
ENSMUSG00000033707	s1	-0.586522	841	2	Cortex	24
ENSMUSG00000033669	s1	1.50307	841	2	Cortex	15
ENSMUSG00000033576	s1	-0.676204	841	2	Cortex	9
ENSMUSG00000003970	s1	0.20961	841	2	Cortex	14
ENSMUSG00000057346	s1	-0.660947	841	2	Cortex	16
ENSMUSG00000022443	s1	-1.37178	841	2	Cortex	3
ENSMUSG00000071711	s1	-0.477978	841	2	Cortex	19
ENSMUSG00000022440	s1	-0.289823	841	2	Cortex	14
ENSMUSG00000018169	s1	-0.359404	841	2	Cortex	11
ENSMUSG00000033170	s1	-1.56918	841	2	Cortex	3
ENSMUSG00000022436	s1	1.09508	841	2	Cortex	4
ENSMUSG00000033099	s1	0.81344	841	2	Cortex	21
ENSMUSG00000006378	s1	-0.578855	841	2	Cortex	16
ENSMUSG00000033055	s1	0.302714	841	2	Cortex	3
ENSMUSG00000033006	s1	0.80858	841	2	Cortex	13
ENSMUSG00000042622	s1	-1.21624	841	2	Cortex	1
ENSMUSG00000042632	s1	-0.75647	841	2	Cortex	5
ENSMUSG00000068206	s1	0.351339	841	2	Cortex	12
ENSMUSG00000032988	s1	0.156775	841	2	Cortex	12
ENSMUSG00000033088	s1	0.725998	841	2	Cortex	25
ENSMUSG00000022426	s1	-0.760885	841	2	Cortex	10
ENSMUSG00000022420	s1	0.501182	841	2	Cortex	4
ENSMUSG00000042524	s1	-1.36998	841	2	Cortex	25
ENSMUSG00000000489	s1	-0.689356	841	2	Cortex	18
ENSMUSG00000009585	s1	-1.13181	841	2	Cortex	1
ENSMUSG00000022414	s1	0.210819	841	2	Cortex	21
ENSMUSG00000042428	s1	1.29238	841	2	Cortex	4
ENSMUSG00000042406	s1	0.0739585	841	2	Cortex	18
ENSMUSG00000089715	s1	0.112671	841	2	Cortex	4
ENSMUSG00000022407	s1	-0.499222	841	2	Cortex	9
ENSMUSG00000060036	s1	0.660447	841	2	Cortex	2
ENSMUSG00000022415	s1	0.487535	841	2	Cortex	8
ENSMUSG00000022404	s1	0.227035	841	2	Cortex	3
ENSMUSG00000022401	s1	-0.207763	841	2	Cortex	20
ENSMUSG00000022394	s1	0.497403	841	2	Cortex	10
ENSMUSG00000048546	s1	-1.43913	841	2	Cortex	17
ENSMUSG00000061360	s1	-0.253599	841	2	Cortex	25
ENSMUSG00000042292	s1	0.26301	841	2	Cortex	8
ENSMUSG00000022477	s1	-0.0877864	841	2	Cortex	12
ENSMUSG00000022476	s1	0.694441	841	2	Cortex	24
ENSMUSG00000022474	s1	0.99985	841	2	Cortex	4
ENSMUSG00000096883	s1	-0.188816	841	2	Cortex	13
ENSMUSG00000022471	s1	-0.0358407	841	2	Cortex	5
ENSMUSG00000022450	s1	-1.43589	841	2	Cortex	17
ENSMUSG00000049687	s1	-0.632927	841	2	Cortex	23
ENSMUSG00000047878	s1	-0.890711	841	2	Cortex	11
ENSMUSG00000018042	s1	-0.90982	841	2	Cortex	22
ENSMUSG00000054277	s1	0.0850511	841	2	Cortex	14
ENSMUSG00000016758	s1	-1.28028	841	2	Cortex	3
ENSMUSG00000048755	s1	-0.817521	841	2	Cortex	19
ENSMUSG00000041736	s1	-1.73741	841	2	Cortex	3
ENSMUSG00000041653	s1	-0.14642	841	2	Cortex	17
ENSMUSG00000022437	s1	-1.20458	841	2	Cortex	9
ENSMUSG00000022438	s1	-0.958602	841	2	Cortex	18
ENSMUSG00000018040	s1	0.882999	841	2	Cortex	4
ENSMUSG00000078954	s1	-0.432832	841	2	Cortex	11
ENSMUSG00000055745	s1	1.72706	841	2	Cortex	13
ENSMUSG00000006369	s1	0.0897543	841	2	Cortex	14
ENSMUSG00000064284	s1	-1.75926	841	2	Cortex	25
ENSMUSG00000016541	s1	2.2184	841	2	Cortex	4
ENSMUSG00000016028	s1	-0.109472	841	2	Cortex	22
ENSMUSG00000022382	s1	2.07341	841	2	Cortex	4
ENSMUSG00000035891	s1	-0.057699	841	2	Cortex	6
ENSMUSG00000035828	s1	-0.667802	841	2	Cortex	1
ENSMUSG00000022610	s1	-1.07467	841	2	Cortex	9
ENSMUSG00000015363	s1	-0.879633	841	2	Cortex	19
ENSMUSG00000053137	s1	1.38859	841	2	Cortex	4
ENSMUSG00000036606	s1	-0.134437	841	2	Cortex	3
ENSMUSG00000022614	s1	-0.821389	841	2	Cortex	3
ENSMUSG00000047394	s1	-0.796954	841	2	Cortex	22
ENSMUSG00000022617	s1	-0.783725	841	2	Cortex	3
ENSMUSG00000022620	s1	-0.306216	841	2	Cortex	15
ENSMUSG00000036197	s1	-0.15237	841	2	Cortex	3
ENSMUSG00000036158	s1	0.52179	841	2	Cortex	6
ENSMUSG00000022451	s1	0.307711	841	2	Cortex	22
ENSMUSG00000064210	s1	-0.585677	841	2	Cortex	18
ENSMUSG00000048218	s1	-0.290443	841	2	Cortex	1
ENSMUSG00000044250	s1	-0.835514	841	2	Cortex	1
ENSMUSG00000022462	s1	0.283046	841	2	Cortex	20
ENSMUSG00000023169	s1	1.71439	841	2	Cortex	4
ENSMUSG00000022479	s1	-0.690658	841	2	Cortex	14
ENSMUSG00000022469	s1	-0.64274	841	2	Cortex	6
ENSMUSG00000048175	s1	-1.12663	841	2	Cortex	9
ENSMUSG00000022475	s1	-0.480375	841	2	Cortex	11
ENSMUSG00000022992	s1	1.13424	841	2	Cortex	12
ENSMUSG00000033065	s1	-0.0639079	841	2	Cortex	12
ENSMUSG00000051853	s1	0.604699	841	2	Cortex	4
ENSMUSG00000022999	s1	0.62961	841	2	Cortex	3
ENSMUSG00000023004	s1	1.15805	841	2	Cortex	2
ENSMUSG00000043091	s1	-0.681336	841	2	Cortex	22
ENSMUSG00000023484	s1	0.111228	841	2	Cortex	23
ENSMUSG00000023008	s1	-0.306353	841	2	Cortex	14
ENSMUSG00000037525	s1	0.116285	841	2	Cortex	19
ENSMUSG00000023020	s1	-1.68919	841	2	Cortex	9
ENSMUSG00000023018	s1	1.52888	841	2	Cortex	13
ENSMUSG00000023025	s1	-0.419628	841	2	Cortex	20
ENSMUSG00000023021	s1	0.797833	841	2	Cortex	6
ENSMUSG00000053559	s1	-1.61951	841	2	Cortex	3
ENSMUSG00000037204	s1	-1.56463	841	2	Cortex	17
ENSMUSG00000037185	s1	-1.02836	841	2	Cortex	11
ENSMUSG00000023039	s1	-0.808568	841	2	Cortex	11
ENSMUSG00000049382	s1	-1.18002	841	2	Cortex	22
ENSMUSG00000023043	s1	-1.21282	841	2	Cortex	22
ENSMUSG00000023033	s1	1.06846	841	2	Cortex	13
ENSMUSG00000001288	s1	-0.95027	841	2	Cortex	14
ENSMUSG00000001289	s1	1.45248	841	2	Cortex	4
ENSMUSG00000023051	s1	0.366269	841	2	Cortex	21
ENSMUSG00000062683	s1	-0.623073	841	2	Cortex	9
ENSMUSG00000009575	s1	1.7315	841	2	Cortex	4
ENSMUSG00000063234	s1	-0.902436	841	2	Cortex	10
ENSMUSG00000000552	s1	0.463188	841	2	Cortex	7
ENSMUSG00000022489	s1	0.78107	841	2	Cortex	13
ENSMUSG00000049871	s1	0.0937181	841	2	Cortex	25
ENSMUSG00000005718	s1	0.0630059	841	2	Cortex	5
ENSMUSG00000014303	s1	0.64415	841	2	Cortex	2
ENSMUSG00000014301	s1	-1.01146	841	2	Cortex	17
ENSMUSG00000063445	s1	1.3989	841	2	Cortex	23
ENSMUSG00000004069	s1	-1.32495	841	2	Cortex	5
ENSMUSG00000004070	s1	-0.625062	841	2	Cortex	10
ENSMUSG00000072235	s1	2.19048	841	2	Cortex	4
ENSMUSG00000022540	s1	-0.0409257	841	2	Cortex	7
ENSMUSG00000051669	s1	-0.476359	841	2	Cortex	11
ENSMUSG00000093575	s1	0.381373	841	2	Cortex	10
ENSMUSG00000005983	s1	-0.0646583	841	2	Cortex	18
ENSMUSG00000022536	s1	1.7296	841	2	Cortex	7
ENSMUSG00000039345	s1	0.241012	841	2	Cortex	12
ENSMUSG00000043140	s1	-0.194595	841	2	Cortex	17
ENSMUSG00000008393	s1	0.447012	841	2	Cortex	3
ENSMUSG00000022507	s1	-0.76361	841	2	Cortex	25
ENSMUSG00000022505	s1	-0.77315	841	2	Cortex	11
ENSMUSG00000037991	s1	-0.0612766	841	2	Cortex	9
ENSMUSG00000022500	s1	-1.39177	841	2	Cortex	22
ENSMUSG00000068663	s1	0.357198	841	2	Cortex	12
ENSMUSG00000037972	s1	1.76392	841	2	Cortex	4
ENSMUSG00000005846	s1	0.544586	841	2	Cortex	9
ENSMUSG00000062203	s1	0.481375	841	2	Cortex	23
ENSMUSG00000022545	s1	0.784558	841	2	Cortex	13
ENSMUSG00000022685	s1	0.23401	841	2	Cortex	22
ENSMUSG00000022684	s1	-1.04869	841	2	Cortex	19
ENSMUSG00000022682	s1	1.15948	841	2	Cortex	12
ENSMUSG00000022672	s1	-0.0870974	841	2	Cortex	20
ENSMUSG00000023088	s1	-0.0104246	841	2	Cortex	18
ENSMUSG00000022671	s1	-0.835351	841	2	Cortex	5
ENSMUSG00000041974	s1	-0.922992	841	2	Cortex	22
ENSMUSG00000022792	s1	-0.465783	841	2	Cortex	5
ENSMUSG00000026181	s1	-1.07498	841	2	Cortex	11
ENSMUSG00000063358	s1	0.720229	841	2	Cortex	13
ENSMUSG00000022681	s1	0.143324	841	2	Cortex	14
ENSMUSG00000022773	s1	2.4553	841	2	Cortex	13
ENSMUSG00000022771	s1	0.345522	841	2	Cortex	15
ENSMUSG00000022763	s1	-0.490787	841	2	Cortex	13
ENSMUSG00000038965	s1	0.840603	841	2	Cortex	24
ENSMUSG00000041774	s1	2.29755	841	2	Cortex	4
ENSMUSG00000022760	s1	-0.632195	841	2	Cortex	10
ENSMUSG00000022761	s1	1.23298	841	2	Cortex	4
ENSMUSG00000012017	s1	-1.0203	841	2	Cortex	14
ENSMUSG00000012114	s1	1.17512	841	2	Cortex	7
ENSMUSG00000055692	s1	0.782616	841	2	Cortex	13
ENSMUSG00000041720	s1	0.241794	841	2	Cortex	13
ENSMUSG00000003528	s1	0.648174	841	2	Cortex	16
ENSMUSG00000043811	s1	1.40093	841	2	Cortex	13
ENSMUSG00000009097	s1	-0.771795	841	2	Cortex	18
ENSMUSG00000041378	s1	0.0182465	841	2	Cortex	11
ENSMUSG00000005732	s1	1.83811	841	2	Cortex	7
ENSMUSG00000022721	s1	0.231268	841	2	Cortex	2
ENSMUSG00000041205	s1	0.488727	841	2	Cortex	13
ENSMUSG00000000326	s1	-0.842895	841	2	Cortex	16
ENSMUSG00000071632	s1	-1.16948	841	2	Cortex	19
ENSMUSG00000022822	s1	0.952988	841	2	Cortex	6
ENSMUSG00000033809	s1	-1.16988	841	2	Cortex	5
ENSMUSG00000022842	s1	-0.705994	841	2	Cortex	24
ENSMUSG00000022841	s1	1.85394	841	2	Cortex	4
ENSMUSG00000006998	s1	0.36931	841	2	Cortex	9
ENSMUSG00000005958	s1	-0.183347	841	2	Cortex	2
ENSMUSG00000021018	s1	1.26115	841	2	Cortex	21
ENSMUSG00000022843	s1	2.38296e-05	841	2	Cortex	10
ENSMUSG00000044626	s1	-0.640487	841	2	Cortex	11
ENSMUSG00000022856	s1	0.62025	841	2	Cortex	22
ENSMUSG00000004462	s1	-0.572102	841	2	Cortex	16
ENSMUSG00000022861	s1	0.760656	841	2	Cortex	13
ENSMUSG00000022885	s1	-0.249145	841	2	Cortex	22
ENSMUSG00000033355	s1	-1.55303	841	2	Cortex	22
ENSMUSG00000022512	s1	-0.401385	841	2	Cortex	16
ENSMUSG00000022523	s1	1.04189	841	2	Cortex	13
ENSMUSG00000022525	s1	-0.355929	841	2	Cortex	12
ENSMUSG00000022528	s1	-0.996283	841	2	Cortex	3
ENSMUSG00000022533	s1	-0.139663	841	2	Cortex	22
ENSMUSG00000038084	s1	0.546548	841	2	Cortex	24
ENSMUSG00000046546	s1	-1.70439	841	2	Cortex	11
ENSMUSG00000022538	s1	-0.357615	841	2	Cortex	19
ENSMUSG00000047434	s1	0.560117	841	2	Cortex	4
ENSMUSG00000049076	s1	-0.821345	841	2	Cortex	6
ENSMUSG00000045625	s1	0.189591	841	2	Cortex	13
ENSMUSG00000107002	s1	0.0211538	841	2	Cortex	12
ENSMUSG00000014075	s1	0.856796	841	2	Cortex	18
ENSMUSG00000022797	s1	0.0949513	841	2	Cortex	21
ENSMUSG00000022807	s1	0.34828	841	2	Cortex	19
ENSMUSG00000022808	s1	1.00919	841	2	Cortex	2
ENSMUSG00000035506	s1	0.972064	841	2	Cortex	10
ENSMUSG00000075254	s1	-0.884877	841	2	Cortex	11
ENSMUSG00000022814	s1	-0.105995	841	2	Cortex	16
ENSMUSG00000035376	s1	-0.883293	841	2	Cortex	16
ENSMUSG00000034473	s1	-0.33261	841	2	Cortex	16
ENSMUSG00000052133	s1	1.24258	841	2	Cortex	13
ENSMUSG00000047746	s1	-0.559667	841	2	Cortex	9
ENSMUSG00000022828	s1	1.03205	841	2	Cortex	20
ENSMUSG00000022820	s1	-0.548162	841	2	Cortex	17
ENSMUSG00000034243	s1	-0.673199	841	2	Cortex	10
ENSMUSG00000022816	s1	-0.458235	841	2	Cortex	14
ENSMUSG00000034158	s1	-0.679089	841	2	Cortex	20
ENSMUSG00000022803	s1	-0.987549	841	2	Cortex	9
ENSMUSG00000002846	s1	-0.84493	841	2	Cortex	5
ENSMUSG00000034064	s1	-0.263433	841	2	Cortex	6
ENSMUSG00000022799	s1	-0.660886	841	2	Cortex	11
ENSMUSG00000049436	s1	-0.743899	841	2	Cortex	11
ENSMUSG00000022790	s1	0.169013	841	2	Cortex	10
ENSMUSG00000022793	s1	0.159494	841	2	Cortex	6
ENSMUSG00000071550	s1	-0.490839	841	2	Cortex	11
ENSMUSG00000062082	s1	-0.741309	841	2	Cortex	1
ENSMUSG00000036208	s1	0.0804223	841	2	Cortex	20
ENSMUSG00000022668	s1	-0.36388	841	2	Cortex	24
ENSMUSG00000052459	s1	0.864336	841	2	Cortex	4
ENSMUSG00000052013	s1	-0.761459	841	2	Cortex	1
ENSMUSG00000022663	s1	-0.539133	841	2	Cortex	16
ENSMUSG00000033157	s1	-0.215162	841	2	Cortex	12
ENSMUSG00000022651	s1	-0.745775	841	2	Cortex	14
ENSMUSG00000022656	s1	0.332609	841	2	Cortex	22
ENSMUSG00000022661	s1	1.02557	841	2	Cortex	6
ENSMUSG00000033149	s1	-1.19026	841	2	Cortex	22
ENSMUSG00000033031	s1	0.911681	841	2	Cortex	23
ENSMUSG00000032965	s1	1.2314	841	2	Cortex	4
ENSMUSG00000022636	s1	0.0567001	841	2	Cortex	15
ENSMUSG00000022757	s1	1.80864	841	2	Cortex	24
ENSMUSG00000022751	s1	-0.768013	841	2	Cortex	16
ENSMUSG00000022752	s1	1.4955	841	2	Cortex	24
ENSMUSG00000098274	s1	0.389546	841	2	Cortex	14
ENSMUSG00000050312	s1	0.299018	841	2	Cortex	20
ENSMUSG00000022747	s1	-1.43544	841	2	Cortex	18
ENSMUSG00000022911	s1	0.617586	841	2	Cortex	11
ENSMUSG00000054604	s1	1.27455	841	2	Cortex	15
ENSMUSG00000032940	s1	1.59864	841	2	Cortex	13
ENSMUSG00000032932	s1	0.726124	841	2	Cortex	10
ENSMUSG00000022889	s1	-0.966698	841	2	Cortex	16
ENSMUSG00000022890	s1	-0.72337	841	2	Cortex	9
ENSMUSG00000022894	s1	-0.99284	841	2	Cortex	9
ENSMUSG00000044442	s1	-0.360013	841	2	Cortex	12
ENSMUSG00000041079	s1	0.391787	841	2	Cortex	10
ENSMUSG00000022892	s1	0.551414	841	2	Cortex	4
ENSMUSG00000022978	s1	0.272394	841	2	Cortex	14
ENSMUSG00000039956	s1	-1.08985	841	2	Cortex	16
ENSMUSG00000039903	s1	-0.422682	841	2	Cortex	11
ENSMUSG00000039929	s1	1.18344	841	2	Cortex	20
ENSMUSG00000022972	s1	-1.17489	841	2	Cortex	18
ENSMUSG00000025616	s1	-0.366756	841	2	Cortex	25
ENSMUSG00000025613	s1	2.35065	841	2	Cortex	21
ENSMUSG00000002489	s1	0.619169	841	2	Cortex	4
ENSMUSG00000022971	s1	-0.892092	841	2	Cortex	22
ENSMUSG00000022969	s1	-1.30017	841	2	Cortex	1
ENSMUSG00000022962	s1	-0.0976126	841	2	Cortex	17
ENSMUSG00000039680	s1	1.42863	841	2	Cortex	21
ENSMUSG00000022952	s1	-1.2423	841	2	Cortex	14
ENSMUSG00000022941	s1	-0.70978	841	2	Cortex	11
ENSMUSG00000062609	s1	-0.656355	841	2	Cortex	11
ENSMUSG00000040732	s1	-0.921513	841	2	Cortex	11
ENSMUSG00000022895	s1	-1.1725	841	2	Cortex	6
ENSMUSG00000022913	s1	0.293171	841	2	Cortex	16
ENSMUSG00000040681	s1	0.266028	841	2	Cortex	14
ENSMUSG00000074892	s1	0.210295	841	2	Cortex	13
ENSMUSG00000005251	s1	-1.07832	841	2	Cortex	3
ENSMUSG00000036983	s1	-1.04102	841	2	Cortex	5
ENSMUSG00000004945	s1	-1.44147	841	2	Cortex	9
ENSMUSG00000023805	s1	-1.23332	841	2	Cortex	8
ENSMUSG00000000579	s1	0.44708	841	2	Cortex	18
ENSMUSG00000023806	s1	-0.852982	841	2	Cortex	17
ENSMUSG00000052397	s1	-0.408454	841	2	Cortex	2
ENSMUSG00000022961	s1	0.251587	841	2	Cortex	11
ENSMUSG00000022960	s1	1.75001	841	2	Cortex	7
ENSMUSG00000022956	s1	0.195338	841	2	Cortex	12
ENSMUSG00000096255	s1	1.337	841	2	Cortex	14
ENSMUSG00000095687	s1	-1.22984	841	2	Cortex	25
ENSMUSG00000073471	s1	-0.139461	841	2	Cortex	20
ENSMUSG00000023873	s1	-0.0960233	841	2	Cortex	15
ENSMUSG00000037196	s1	0.0100717	841	2	Cortex	6
ENSMUSG00000062078	s1	-0.260781	841	2	Cortex	18
ENSMUSG00000023826	s1	-0.434143	841	2	Cortex	12
ENSMUSG00000023827	s1	0.0999405	841	2	Cortex	6
ENSMUSG00000022940	s1	-1.05796	841	2	Cortex	9
ENSMUSG00000040785	s1	1.71476	841	2	Cortex	13
ENSMUSG00000022898	s1	-0.103451	841	2	Cortex	3
ENSMUSG00000014426	s1	0.136736	841	2	Cortex	12
ENSMUSG00000068037	s1	-0.465859	841	2	Cortex	13
ENSMUSG00000006818	s1	-1.26037	841	2	Cortex	17
ENSMUSG00000057388	s1	-0.643908	841	2	Cortex	17
ENSMUSG00000023885	s1	-0.588659	841	2	Cortex	21
ENSMUSG00000014773	s1	0.946623	841	2	Cortex	11
ENSMUSG00000051977	s1	-1.35799	841	2	Cortex	20
ENSMUSG00000003665	s1	-0.271449	841	2	Cortex	18
ENSMUSG00000023882	s1	-0.446163	841	2	Cortex	19
ENSMUSG00000062743	s1	-0.704444	841	2	Cortex	25
ENSMUSG00000051341	s1	0.219669	841	2	Cortex	18
ENSMUSG00000063383	s1	0.136491	841	2	Cortex	20
ENSMUSG00000059142	s1	-0.478002	841	2	Cortex	3
ENSMUSG00000007564	s1	1.62494	841	2	Cortex	4
ENSMUSG00000036820	s1	-1.39208	841	2	Cortex	22
ENSMUSG00000072082	s1	-0.0267803	841	2	Cortex	23
ENSMUSG00000039218	s1	0.224685	841	2	Cortex	6
ENSMUSG00000002504	s1	-0.718195	841	2	Cortex	11
ENSMUSG00000041130	s1	-0.511788	841	2	Cortex	22
ENSMUSG00000040888	s1	-0.863373	841	2	Cortex	5
ENSMUSG00000024121	s1	0.435585	841	2	Cortex	13
ENSMUSG00000024118	s1	-0.334106	841	2	Cortex	16
ENSMUSG00000052752	s1	1.21611	841	2	Cortex	2
ENSMUSG00000079657	s1	-0.177048	841	2	Cortex	13
ENSMUSG00000002500	s1	-0.635964	841	2	Cortex	9
ENSMUSG00000075705	s1	-1.42289	841	2	Cortex	19
ENSMUSG00000040048	s1	-0.865162	841	2	Cortex	12
ENSMUSG00000024165	s1	0.825593	841	2	Cortex	23
ENSMUSG00000047507	s1	-0.337483	841	2	Cortex	6
ENSMUSG00000033825	s1	-0.582485	841	2	Cortex	21
ENSMUSG00000024176	s1	1.17516	841	2	Cortex	13
ENSMUSG00000015120	s1	1.79955	841	2	Cortex	2
ENSMUSG00000002279	s1	-1.55726	841	2	Cortex	16
ENSMUSG00000025739	s1	-0.0858647	841	2	Cortex	13
ENSMUSG00000019214	s1	0.510346	841	2	Cortex	23
ENSMUSG00000071202	s1	-0.581791	841	2	Cortex	11
ENSMUSG00000002280	s1	-1.23211	841	2	Cortex	17
ENSMUSG00000024112	s1	1.78261	841	2	Cortex	13
ENSMUSG00000036775	s1	-0.647066	841	2	Cortex	16
ENSMUSG00000024180	s1	-0.878326	841	2	Cortex	22
ENSMUSG00000024181	s1	-0.186923	841	2	Cortex	9
ENSMUSG00000024182	s1	2.01603	841	2	Cortex	22
ENSMUSG00000024187	s1	-1.25646	841	2	Cortex	25
ENSMUSG00000073433	s1	1.54541	841	2	Cortex	4
ENSMUSG00000024186	s1	0.789374	841	2	Cortex	6
ENSMUSG00000024191	s1	-0.24167	841	2	Cortex	5
ENSMUSG00000024193	s1	-0.806301	841	2	Cortex	1
ENSMUSG00000001576	s1	1.92466	841	2	Cortex	7
ENSMUSG00000048731	s1	-1.09774	841	2	Cortex	17
ENSMUSG00000024208	s1	-0.494397	841	2	Cortex	9
ENSMUSG00000044857	s1	-0.0991656	841	2	Cortex	25
ENSMUSG00000046711	s1	1.16347	841	2	Cortex	7
ENSMUSG00000062753	s1	0.232774	841	2	Cortex	4
ENSMUSG00000024213	s1	1.49536	841	2	Cortex	8
ENSMUSG00000024217	s1	2.14056	841	2	Cortex	23
ENSMUSG00000039512	s1	0.203181	841	2	Cortex	17
ENSMUSG00000002274	s1	0.117338	841	2	Cortex	8
ENSMUSG00000025737	s1	-0.169242	841	2	Cortex	5
ENSMUSG00000025732	s1	-1.10231	841	2	Cortex	5
ENSMUSG00000024219	s1	-0.132081	841	2	Cortex	11
ENSMUSG00000002249	s1	-0.976957	841	2	Cortex	3
ENSMUSG00000004864	s1	-0.885407	841	2	Cortex	14
ENSMUSG00000048905	s1	0.810286	841	2	Cortex	13
ENSMUSG00000064147	s1	-0.935295	841	2	Cortex	14
ENSMUSG00000071172	s1	0.80243	841	2	Cortex	14
ENSMUSG00000024011	s1	-0.85473	841	2	Cortex	9
ENSMUSG00000052712	s1	-1.08157	841	2	Cortex	19
ENSMUSG00000073436	s1	-2.16097	841	2	Cortex	10
ENSMUSG00000024012	s1	1.30243	841	2	Cortex	4
ENSMUSG00000043557	s1	1.3484	841	2	Cortex	8
ENSMUSG00000024026	s1	-1.3513	841	2	Cortex	5
ENSMUSG00000024030	s1	-0.751912	841	2	Cortex	15
ENSMUSG00000024036	s1	0.146662	841	2	Cortex	1
ENSMUSG00000024018	s1	-1.08081	841	2	Cortex	5
ENSMUSG00000024038	s1	-0.188883	841	2	Cortex	9
ENSMUSG00000041119	s1	0.796901	841	2	Cortex	15
ENSMUSG00000061613	s1	1.47134	841	2	Cortex	23
ENSMUSG00000038146	s1	-0.222977	841	2	Cortex	14
ENSMUSG00000024045	s1	1.09595	841	2	Cortex	18
ENSMUSG00000091586	s1	-0.500177	841	2	Cortex	16
ENSMUSG00000055202	s1	2.18336	841	2	Cortex	13
ENSMUSG00000053600	s1	-0.587056	841	2	Cortex	25
ENSMUSG00000095253	s1	0.867278	841	2	Cortex	24
ENSMUSG00000073423	s1	0.85575	841	2	Cortex	7
ENSMUSG00000024299	s1	-0.299967	841	2	Cortex	11
ENSMUSG00000002308	s1	-0.710718	841	2	Cortex	9
ENSMUSG00000041881	s1	-1.19591	841	2	Cortex	25
ENSMUSG00000024308	s1	-1.50995	841	2	Cortex	1
ENSMUSG00000042099	s1	-1.16096	841	2	Cortex	11
ENSMUSG00000002307	s1	0.548498	841	2	Cortex	23
ENSMUSG00000041354	s1	-0.300945	841	2	Cortex	6
ENSMUSG00000067370	s1	0.143639	841	2	Cortex	6
ENSMUSG00000024312	s1	0.548409	841	2	Cortex	5
ENSMUSG00000073422	s1	-1.53292	841	2	Cortex	19
ENSMUSG00000024327	s1	-1.0678	841	2	Cortex	3
ENSMUSG00000079547	s1	-1.47621	841	2	Cortex	1
ENSMUSG00000073421	s1	-1.61833	841	2	Cortex	1
ENSMUSG00000036594	s1	-1.49435	841	2	Cortex	1
ENSMUSG00000060586	s1	-1.47785	841	2	Cortex	1
ENSMUSG00000037321	s1	-1.428	841	2	Cortex	22
ENSMUSG00000015468	s1	-0.691376	841	2	Cortex	11
ENSMUSG00000015452	s1	-0.690261	841	2	Cortex	11
ENSMUSG00000034786	s1	-1.75265	841	2	Cortex	1
ENSMUSG00000034673	s1	-0.534317	841	2	Cortex	2
ENSMUSG00000015461	s1	1.19269	841	2	Cortex	15
ENSMUSG00000024369	s1	-0.446323	841	2	Cortex	22
ENSMUSG00000092609	s1	-0.233151	841	2	Cortex	20
ENSMUSG00000007033	s1	-0.351124	841	2	Cortex	12
ENSMUSG00000007050	s1	0.773616	841	2	Cortex	23
ENSMUSG00000034254	s1	1.04708	841	2	Cortex	8
ENSMUSG00000007030	s1	-0.735918	841	2	Cortex	9
ENSMUSG00000073413	s1	-0.495896	841	2	Cortex	14
ENSMUSG00000007039	s1	1.49904	841	2	Cortex	14
ENSMUSG00000007036	s1	-2.24222	841	2	Cortex	18
ENSMUSG00000013787	s1	1.97714	841	2	Cortex	4
ENSMUSG00000024401	s1	-1.02689	841	2	Cortex	1
ENSMUSG00000024399	s1	-0.845286	841	2	Cortex	1
ENSMUSG00000024403	s1	0.638065	841	2	Cortex	13
ENSMUSG00000073411	s1	-1.68247	841	2	Cortex	1
ENSMUSG00000035929	s1	-1.55532	841	2	Cortex	1
ENSMUSG00000001524	s1	-0.706559	841	2	Cortex	5
ENSMUSG00000024393	s1	1.20285	841	2	Cortex	2
ENSMUSG00000003541	s1	-1.15437	841	2	Cortex	11
ENSMUSG00000019432	s1	1.72672	841	2	Cortex	2
ENSMUSG00000003534	s1	0.522858	841	2	Cortex	6
ENSMUSG00000059714	s1	-0.144543	841	2	Cortex	6
ENSMUSG00000024422	s1	-0.785623	841	2	Cortex	3
ENSMUSG00000034595	s1	0.908822	841	2	Cortex	14
ENSMUSG00000039220	s1	0.6514	841	2	Cortex	10
ENSMUSG00000038500	s1	2.44345	841	2	Cortex	7
ENSMUSG00000024429	s1	0.224745	841	2	Cortex	4
ENSMUSG00000024446	s1	0.257039	841	2	Cortex	25
ENSMUSG00000050747	s1	0.28462	841	2	Cortex	1
ENSMUSG00000036398	s1	0.989908	841	2	Cortex	13
ENSMUSG00000001525	s1	2.51517	841	2	Cortex	4
ENSMUSG00000036036	s1	2.70065	841	2	Cortex	2
ENSMUSG00000016206	s1	-1.28694	841	2	Cortex	1
ENSMUSG00000050705	s1	0.758598	841	2	Cortex	12
ENSMUSG00000024436	s1	-0.469031	841	2	Cortex	5
ENSMUSG00000023913	s1	-0.444413	841	2	Cortex	8
ENSMUSG00000023961	s1	-1.03301	841	2	Cortex	9
ENSMUSG00000023932	s1	1.07582	841	2	Cortex	12
ENSMUSG00000039153	s1	0.840762	841	2	Cortex	4
ENSMUSG00000038954	s1	0.614452	841	2	Cortex	5
ENSMUSG00000096847	s1	1.47421	841	2	Cortex	13
ENSMUSG00000023942	s1	-0.537746	841	2	Cortex	22
ENSMUSG00000023967	s1	-1.06179	841	2	Cortex	17
ENSMUSG00000067150	s1	1.95505	841	2	Cortex	24
ENSMUSG00000023952	s1	-0.420295	841	2	Cortex	18
ENSMUSG00000032842	s1	-0.345677	841	2	Cortex	16
ENSMUSG00000023977	s1	-0.951746	841	2	Cortex	20
ENSMUSG00000023979	s1	-0.633957	841	2	Cortex	17
ENSMUSG00000034382	s1	-1.129	841	2	Cortex	22
ENSMUSG00000023980	s1	-1.73426	841	2	Cortex	25
ENSMUSG00000034729	s1	-0.526756	841	2	Cortex	5
ENSMUSG00000032717	s1	-0.746825	841	2	Cortex	14
ENSMUSG00000023993	s1	-0.770509	841	2	Cortex	23
ENSMUSG00000023992	s1	-0.838159	841	2	Cortex	7
ENSMUSG00000023988	s1	0.975487	841	2	Cortex	24
ENSMUSG00000051682	s1	-0.732697	841	2	Cortex	22
ENSMUSG00000033475	s1	0.252946	841	2	Cortex	7
ENSMUSG00000040771	s1	-1.42281	841	2	Cortex	19
ENSMUSG00000040694	s1	-0.729397	841	2	Cortex	9
ENSMUSG00000064120	s1	-1.57474	841	2	Cortex	19
ENSMUSG00000038910	s1	0.614012	841	2	Cortex	24
ENSMUSG00000023994	s1	2.67114	841	2	Cortex	2
ENSMUSG00000040658	s1	-0.18736	841	2	Cortex	5
ENSMUSG00000015605	s1	-0.683419	841	2	Cortex	18
ENSMUSG00000023972	s1	0.300654	841	2	Cortex	2
ENSMUSG00000038545	s1	0.7471	841	2	Cortex	2
ENSMUSG00000062619	s1	-0.720788	841	2	Cortex	19
ENSMUSG00000003208	s1	-0.874223	841	2	Cortex	25
ENSMUSG00000003199	s1	0.548486	841	2	Cortex	10
ENSMUSG00000011305	s1	-1.09877	841	2	Cortex	19
ENSMUSG00000044469	s1	-0.0628179	841	2	Cortex	10
ENSMUSG00000043683	s1	-0.287661	841	2	Cortex	12
ENSMUSG00000042625	s1	-1.06317	841	2	Cortex	11
ENSMUSG00000041168	s1	-0.768779	841	2	Cortex	5
ENSMUSG00000071054	s1	0.944912	841	2	Cortex	2
ENSMUSG00000054723	s1	-0.633338	841	2	Cortex	3
ENSMUSG00000002379	s1	-0.876362	841	2	Cortex	17
ENSMUSG00000024206	s1	-1.17813	841	2	Cortex	14
ENSMUSG00000002661	s1	-1.16891	841	2	Cortex	9
ENSMUSG00000002660	s1	-0.348437	841	2	Cortex	5
ENSMUSG00000002658	s1	1.0776	841	2	Cortex	7
ENSMUSG00000007670	s1	1.38729	841	2	Cortex	7
ENSMUSG00000048915	s1	1.33799	841	2	Cortex	7
ENSMUSG00000023965	s1	0.526688	841	2	Cortex	12
ENSMUSG00000056515	s1	1.40244	841	2	Cortex	6
ENSMUSG00000024098	s1	-0.810184	841	2	Cortex	3
ENSMUSG00000024096	s1	-0.943686	841	2	Cortex	11
ENSMUSG00000035842	s1	0.0509962	841	2	Cortex	23
ENSMUSG00000024099	s1	-0.373413	841	2	Cortex	9
ENSMUSG00000024101	s1	1.10828	841	2	Cortex	5
ENSMUSG00000023460	s1	0.600914	841	2	Cortex	18
ENSMUSG00000024043	s1	1.00804	841	2	Cortex	14
ENSMUSG00000024044	s1	0.909157	841	2	Cortex	13
ENSMUSG00000047407	s1	-1.52281	841	2	Cortex	19
ENSMUSG00000052525	s1	1.35	841	2	Cortex	24
ENSMUSG00000024063	s1	-0.180432	841	2	Cortex	11
ENSMUSG00000024064	s1	1.48602	841	2	Cortex	13
ENSMUSG00000034868	s1	1.00194	841	2	Cortex	15
ENSMUSG00000024048	s1	-1.48862	841	2	Cortex	14
ENSMUSG00000091831	s1	-0.93599	841	2	Cortex	17
ENSMUSG00000024078	s1	0.113639	841	2	Cortex	17
[truncated: 286,121+ more rows]

## Sheet: sdata9
period	change	n
Development	Converge	5939
Development	Diverge	9058
Ageing	Converge	7748
Ageing	Diverge	7187

[truncated: 33 more sheets: sdata10, sdata11, sdata12, sdata13, sdata14, sdata15, sdata16, sdata17, sdata18, sdata19, sdata20, sdata21, sdata22, sdata23, sdata24, sdata25, sdata26, sdata27, sdata28, sdata29 …]
