# Supplementary material for: Inter-tissue convergence of gene expression during ageing suggests age-related loss of tissue and cellular identity
Source: eLife journal article supplement (doi:10.7554/elife.68048), 2022-01-31
Supplement: supp [file elife-68048-supp-v1.zip › elife_poa_e68048_Figure_3_source_data_1.xlsx]

## Sheet: sdata0
sheet		relevant figure
sdata1	Reversal patterns among tissue-specific genes: cortex specific	figure3a
sdata2	Reversal patterns among tissue-specific genes: liver specific	figure3b
sdata3	Reversal patterns among tissue-specific genes: lung specific	figure3c
sdata4	Reversal patterns among tissue-specific genes: muscle specific	figure3d
sdata5	enrichment of tissue spec. genes among UD reversal genes (contingency table)	Figure 3
sdata6	enrichment of tissue spec. genes among UD reversal genes (two-sided fisher test result)	Figure 3
sdata7	enrichment of tissue spec. genes among DiCo genes (contingency table)	Figure 3
sdata8	enrichment of tissue spec. genes among DiCo genes (two-sided fisher test result)	Figure 3

## Sheet: sdata1
geneid	tissue	ES	spec	rho	period	Development	Ageing	dev	age	rev
ENSMUSG00000067879	Cortex	7.99826	Cortex	0.774806	Development	0.774806	-0.119763	Up	Down	UpDown
ENSMUSG00000067879	Cortex	7.99826	Cortex	-0.119763	Ageing	0.774806	-0.119763	Up	Down	UpDown
ENSMUSG00000057715	Cortex	12.7054	Cortex	0.486506	Development	0.486506	-0.407193	Up	Down	UpDown
ENSMUSG00000057715	Cortex	12.7054	Cortex	-0.407193	Ageing	0.486506	-0.407193	Up	Down	UpDown
ENSMUSG00000092083	Cortex	8.17027	Cortex	0.3	Development	0.3	-0.862291	Up	Down	UpDown
ENSMUSG00000092083	Cortex	8.17027	Cortex	-0.862291	Ageing	0.3	-0.862291	Up	Down	UpDown
ENSMUSG00000025777	Cortex	6.9009	Cortex	-0.810844	Development	-0.810844	-0.814386	Down	Down	DownDown
ENSMUSG00000025777	Cortex	6.9009	Cortex	-0.814386	Ageing	-0.810844	-0.814386	Down	Down	DownDown
ENSMUSG00000028033	Cortex	4.77758	Cortex	0.666694	Development	0.666694	0.179644	Up	Up	UpUp
ENSMUSG00000028033	Cortex	4.77758	Cortex	0.179644	Ageing	0.666694	0.179644	Up	Up	UpUp
ENSMUSG00000041670	Cortex	12.6258	Cortex	0.738769	Development	0.738769	0.0718576	Up	Up	UpUp
ENSMUSG00000041670	Cortex	12.6258	Cortex	0.0718576	Ageing	0.738769	0.0718576	Up	Up	UpUp
ENSMUSG00000026141	Cortex	4.75793	Cortex	0.234244	Development	0.234244	-0.131739	Up	Down	UpDown
ENSMUSG00000026141	Cortex	4.75793	Cortex	-0.131739	Ageing	0.234244	-0.131739	Up	Down	UpDown
ENSMUSG00000026156	Cortex	8.44745	Cortex	-0.828862	Development	-0.828862	-0.503003	Down	Down	DownDown
ENSMUSG00000026156	Cortex	8.44745	Cortex	-0.503003	Ageing	-0.828862	-0.503003	Down	Down	DownDown
ENSMUSG00000026155	Cortex	4.43818	Cortex	-0.666694	Development	-0.666694	-0.658694	Down	Down	DownDown
ENSMUSG00000026155	Cortex	4.43818	Cortex	-0.658694	Ageing	-0.666694	-0.658694	Down	Down	DownDown
ENSMUSG00000042182	Cortex	20.6366	Cortex	-0.846881	Development	-0.846881	0.203596	Down	Up	DownUp
ENSMUSG00000042182	Cortex	20.6366	Cortex	0.203596	Ageing	-0.846881	0.203596	Down	Up	DownUp
ENSMUSG00000037509	Cortex	5.97229	Cortex	0.991031	Development	0.991031	0.301205	Up	Up	UpUp
ENSMUSG00000037509	Cortex	5.97229	Cortex	0.301205	Ageing	0.991031	0.301205	Up	Up	UpUp
ENSMUSG00000026113	Cortex	6.09183	Cortex	0.882919	Development	0.882919	-0.706599	Up	Down	UpDown
ENSMUSG00000026113	Cortex	6.09183	Cortex	-0.706599	Ageing	0.882919	-0.706599	Up	Down	UpDown
ENSMUSG00000048814	Cortex	21.9199	Cortex	-0.900937	Development	-0.900937	-0.874267	Down	Down	DownDown
ENSMUSG00000048814	Cortex	21.9199	Cortex	-0.874267	Ageing	-0.900937	-0.874267	Down	Down	DownDown
ENSMUSG00000026080	Cortex	9.47536	Cortex	-0.270281	Development	-0.270281	0.431145	Down	Up	DownUp
ENSMUSG00000026080	Cortex	9.47536	Cortex	0.431145	Ageing	-0.270281	0.431145	Down	Up	DownUp
ENSMUSG00000026077	Cortex	6.3746	Cortex	0.846881	Development	0.846881	-0.19162	Up	Down	UpDown
ENSMUSG00000026077	Cortex	6.3746	Cortex	-0.19162	Ageing	0.846881	-0.19162	Up	Down	UpDown
ENSMUSG00000050967	Cortex	6.38287	Cortex	0.738769	Development	0.738769	0.0958101	Up	Up	UpUp
ENSMUSG00000050967	Cortex	6.38287	Cortex	0.0958101	Ageing	0.738769	0.0958101	Up	Up	UpUp
ENSMUSG00000045515	Cortex	12.4425	Cortex	-0.954994	Development	-0.954994	0.179644	Down	Up	DownUp
ENSMUSG00000045515	Cortex	12.4425	Cortex	0.179644	Ageing	-0.954994	0.179644	Down	Up	DownUp
ENSMUSG00000026018	Cortex	20.8511	Cortex	-0.594619	Development	-0.594619	-0.179644	Down	Down	DownDown
ENSMUSG00000026018	Cortex	20.8511	Cortex	-0.179644	Ageing	-0.594619	-0.179644	Down	Down	DownDown
ENSMUSG00000026782	Cortex	12.1812	Cortex	-0.846881	Development	-0.846881	-0.754505	Down	Down	DownDown
ENSMUSG00000026782	Cortex	12.1812	Cortex	-0.754505	Ageing	-0.846881	-0.754505	Down	Down	DownDown
ENSMUSG00000025964	Cortex	4.50307	Cortex	0.846881	Development	0.846881	0.347312	Up	Up	UpUp
ENSMUSG00000025964	Cortex	4.50307	Cortex	0.347312	Ageing	0.846881	0.347312	Up	Up	UpUp
ENSMUSG00000055567	Cortex	5.75287	Cortex	0.900937	Development	0.900937	-0.550908	Up	Down	UpDown
ENSMUSG00000055567	Cortex	5.75287	Cortex	-0.550908	Ageing	0.900937	-0.550908	Up	Down	UpDown
ENSMUSG00000062209	Cortex	15.1596	Cortex	-0.810844	Development	-0.810844	-0.610789	Down	Down	DownDown
ENSMUSG00000062209	Cortex	15.1596	Cortex	-0.610789	Ageing	-0.810844	-0.610789	Down	Down	DownDown
ENSMUSG00000026188	Cortex	9.55543	Cortex	-0.666694	Development	-0.666694	-0.946125	Down	Down	DownDown
ENSMUSG00000026188	Cortex	9.55543	Cortex	-0.946125	Ageing	-0.666694	-0.946125	Down	Down	DownDown
ENSMUSG00000039372	Cortex	7.84775	Cortex	-0.936975	Development	-0.936975	-0.467074	Down	Down	DownDown
ENSMUSG00000039372	Cortex	7.84775	Cortex	-0.467074	Ageing	-0.936975	-0.467074	Down	Down	DownDown
ENSMUSG00000090071	Cortex	14.6112	Cortex	0.666694	Development	0.666694	0.0958101	Up	Up	UpUp
ENSMUSG00000090071	Cortex	14.6112	Cortex	0.0958101	Ageing	0.666694	0.0958101	Up	Up	UpUp
ENSMUSG00000026204	Cortex	7.5005	Cortex	0.991031	Development	0.991031	-0.690922	Up	Down	UpDown
ENSMUSG00000026204	Cortex	7.5005	Cortex	-0.690922	Ageing	0.991031	-0.690922	Up	Down	UpDown
ENSMUSG00000051703	Cortex	10.2026	Cortex	0.684712	Development	0.684712	-0.131739	Up	Down	UpDown
ENSMUSG00000051703	Cortex	10.2026	Cortex	-0.131739	Ageing	0.684712	-0.131739	Up	Down	UpDown
ENSMUSG00000050711	Cortex	9.90988	Cortex	0.954994	Development	0.954994	-0.407193	Up	Down	UpDown
ENSMUSG00000050711	Cortex	9.90988	Cortex	-0.407193	Ageing	0.954994	-0.407193	Up	Down	UpDown
ENSMUSG00000026235	Cortex	6.82296	Cortex	-0.396412	Development	-0.396412	-0.275454	Down	Down	DownDown
ENSMUSG00000026235	Cortex	6.82296	Cortex	-0.275454	Ageing	-0.396412	-0.275454	Down	Down	DownDown
ENSMUSG00000015222	Cortex	16.8845	Cortex	-0.809091	Development	-0.809091	-0.903614	Down	Down	DownDown
ENSMUSG00000015222	Cortex	16.8845	Cortex	-0.903614	Ageing	-0.809091	-0.903614	Down	Down	DownDown
ENSMUSG00000026163	Cortex	13.4428	Cortex	0.486506	Development	0.486506	-0.610789	Up	Down	UpDown
ENSMUSG00000026163	Cortex	13.4428	Cortex	-0.610789	Ageing	0.486506	-0.610789	Up	Down	UpDown
ENSMUSG00000036766	Cortex	15.6722	Cortex	-0.774806	Development	-0.774806	-0.203596	Down	Down	DownDown
ENSMUSG00000036766	Cortex	15.6722	Cortex	-0.203596	Ageing	-0.774806	-0.203596	Down	Down	DownDown
ENSMUSG00000062590	Cortex	5.27047	Cortex	0.630656	Development	0.630656	-0.0479051	Up	Down	UpDown
ENSMUSG00000062590	Cortex	5.27047	Cortex	-0.0479051	Ageing	0.630656	-0.0479051	Up	Down	UpDown
ENSMUSG00000055013	Cortex	6.97438	Cortex	-0.738769	Development	-0.738769	-0.0838338	Down	Down	DownDown
ENSMUSG00000055013	Cortex	6.97438	Cortex	-0.0838338	Ageing	-0.738769	-0.0838338	Down	Down	DownDown
ENSMUSG00000014602	Cortex	35.3443	Cortex	-0.563636	Development	-0.563636	-0.668675	Down	Down	DownDown
ENSMUSG00000014602	Cortex	35.3443	Cortex	-0.668675	Ageing	-0.563636	-0.668675	Down	Down	DownDown
ENSMUSG00000026344	Cortex	5.24462	Cortex	0.738769	Development	0.738769	-0.239525	Up	Down	UpDown
ENSMUSG00000026344	Cortex	5.24462	Cortex	-0.239525	Ageing	0.738769	-0.239525	Up	Down	UpDown
ENSMUSG00000056211	Cortex	5.60363	Cortex	0.738769	Development	0.738769	-0.467074	Up	Down	UpDown
ENSMUSG00000056211	Cortex	5.60363	Cortex	-0.467074	Ageing	0.738769	-0.467074	Up	Down	UpDown
ENSMUSG00000026443	Cortex	8.78909	Cortex	-0.198206	Development	-0.198206	0.467074	Down	Up	DownUp
ENSMUSG00000026443	Cortex	8.78909	Cortex	0.467074	Ageing	-0.198206	0.467074	Down	Up	DownUp
ENSMUSG00000026442	Cortex	12.9042	Cortex	0.774806	Development	0.774806	-0.538932	Up	Down	UpDown
ENSMUSG00000026442	Cortex	12.9042	Cortex	-0.538932	Ageing	0.774806	-0.538932	Up	Down	UpDown
ENSMUSG00000053024	Cortex	9.58638	Cortex	-0.630656	Development	-0.630656	0.682647	Down	Up	DownUp
ENSMUSG00000053024	Cortex	9.58638	Cortex	0.682647	Ageing	-0.630656	0.682647	Down	Up	DownUp
ENSMUSG00000026426	Cortex	4.70299	Cortex	-0.991031	Development	-0.991031	0.28743	Down	Up	DownUp
ENSMUSG00000026426	Cortex	4.70299	Cortex	0.28743	Ageing	-0.991031	0.28743	Down	Up	DownUp
ENSMUSG00000041570	Cortex	6.07057	Cortex	-0.900937	Development	-0.900937	-0.778457	Down	Down	DownDown
ENSMUSG00000041570	Cortex	6.07057	Cortex	-0.778457	Ageing	-0.900937	-0.778457	Down	Down	DownDown
ENSMUSG00000033849	Cortex	4.51313	Cortex	0.14415	Development	0.14415	-0.826362	Up	Down	UpDown
ENSMUSG00000033849	Cortex	4.51313	Cortex	-0.826362	Ageing	0.14415	-0.826362	Up	Down	UpDown
ENSMUSG00000041642	Cortex	5.23589	Cortex	-0.72075	Development	-0.72075	0.0958101	Down	Up	DownUp
ENSMUSG00000041642	Cortex	5.23589	Cortex	0.0958101	Ageing	-0.72075	0.0958101	Down	Up	DownUp
ENSMUSG00000042751	Cortex	8.62565	Cortex	0.8649	Development	0.8649	0.0838338	Up	Up	UpUp
ENSMUSG00000042751	Cortex	8.62565	Cortex	0.0838338	Ageing	0.8649	0.0838338	Up	Up	UpUp
ENSMUSG00000042671	Cortex	10.1256	Cortex	0.756787	Development	0.756787	0.0838338	Up	Up	UpUp
ENSMUSG00000042671	Cortex	10.1256	Cortex	0.0838338	Ageing	0.756787	0.0838338	Up	Up	UpUp
ENSMUSG00000004110	Cortex	31.2749	Cortex	0.792825	Development	0.792825	-0.886243	Up	Down	UpDown
ENSMUSG00000004110	Cortex	31.2749	Cortex	-0.886243	Ageing	0.792825	-0.886243	Up	Down	UpDown
ENSMUSG00000004031	Cortex	15.5649	Cortex	0.774806	Development	0.774806	-0.443122	Up	Down	UpDown
ENSMUSG00000004031	Cortex	15.5649	Cortex	-0.443122	Ageing	0.774806	-0.443122	Up	Down	UpDown
ENSMUSG00000026587	Cortex	31.1863	Cortex	0.702731	Development	0.702731	-0.80241	Up	Down	UpDown
ENSMUSG00000026587	Cortex	31.1863	Cortex	-0.80241	Ageing	0.702731	-0.80241	Up	Down	UpDown
ENSMUSG00000015829	Cortex	29.6575	Cortex	0.774806	Development	0.774806	-0.479051	Up	Down	UpDown
ENSMUSG00000015829	Cortex	29.6575	Cortex	-0.479051	Ageing	0.774806	-0.479051	Up	Down	UpDown
ENSMUSG00000044835	Cortex	13.6762	Cortex	-0.594619	Development	-0.594619	-0.658694	Down	Down	DownDown
ENSMUSG00000044835	Cortex	13.6762	Cortex	-0.658694	Ageing	-0.594619	-0.658694	Down	Down	DownDown
ENSMUSG00000040265	Cortex	7.10543	Cortex	-0.360375	Development	-0.360375	-0.155691	Down	Down	DownDown
ENSMUSG00000040265	Cortex	7.10543	Cortex	-0.155691	Ageing	-0.360375	-0.155691	Down	Down	DownDown
ENSMUSG00000026585	Cortex	5.76776	Cortex	-0.936975	Development	-0.936975	-0.491027	Down	Down	DownDown
ENSMUSG00000026585	Cortex	5.76776	Cortex	-0.491027	Ageing	-0.936975	-0.491027	Down	Down	DownDown
ENSMUSG00000060568	Cortex	4.78766	Cortex	-0.954994	Development	-0.954994	-0.850315	Down	Down	DownDown
ENSMUSG00000060568	Cortex	4.78766	Cortex	-0.850315	Ageing	-0.954994	-0.850315	Down	Down	DownDown
ENSMUSG00000070532	Cortex	5.55296	Cortex	0.991031	Development	0.991031	0.550908	Up	Up	UpUp
ENSMUSG00000070532	Cortex	5.55296	Cortex	0.550908	Ageing	0.991031	0.550908	Up	Up	UpUp
ENSMUSG00000038530	Cortex	5.43485	Cortex	0.738769	Development	0.738769	-0.0119763	Up	Down	UpDown
ENSMUSG00000038530	Cortex	5.43485	Cortex	-0.0119763	Ageing	0.738769	-0.0119763	Up	Down	UpDown
ENSMUSG00000044708	Cortex	4.49329	Cortex	0.954994	Development	0.954994	-0.0479051	Up	Down	UpDown
ENSMUSG00000044708	Cortex	4.49329	Cortex	-0.0479051	Ageing	0.954994	-0.0479051	Up	Down	UpDown
ENSMUSG00000038026	Cortex	4.93904	Cortex	0.738769	Development	0.738769	0.275454	Up	Up	UpUp
ENSMUSG00000038026	Cortex	4.93904	Cortex	0.275454	Ageing	0.738769	0.275454	Up	Up	UpUp
ENSMUSG00000038034	Cortex	5.55444	Cortex	0.954994	Development	0.954994	0.275454	Up	Up	UpUp
ENSMUSG00000038034	Cortex	5.55444	Cortex	0.275454	Ageing	0.954994	0.275454	Up	Up	UpUp
ENSMUSG00000028354	Cortex	8.47449	Cortex	0.774806	Development	0.774806	-0.299407	Up	Down	UpDown
ENSMUSG00000028354	Cortex	8.47449	Cortex	-0.299407	Ageing	0.774806	-0.299407	Up	Down	UpDown
ENSMUSG00000026527	Cortex	14.2358	Cortex	0.594619	Development	0.594619	-0.227549	Up	Down	UpDown
ENSMUSG00000026527	Cortex	14.2358	Cortex	-0.227549	Ageing	0.594619	-0.227549	Up	Down	UpDown
ENSMUSG00000005338	Cortex	7.32911	Cortex	-0.378394	Development	-0.378394	-0.431145	Down	Down	DownDown
ENSMUSG00000005338	Cortex	7.32911	Cortex	-0.431145	Ageing	-0.378394	-0.431145	Down	Down	DownDown
ENSMUSG00000063659	Cortex	5.04093	Cortex	-0.991031	Development	-0.991031	0.0119763	Down	Up	DownUp
ENSMUSG00000063659	Cortex	5.04093	Cortex	0.0119763	Ageing	-0.991031	0.0119763	Down	Up	DownUp
ENSMUSG00000053963	Cortex	9.99052	Cortex	0.738769	Development	0.738769	-0.204819	Up	Down	UpDown
ENSMUSG00000053963	Cortex	9.99052	Cortex	-0.204819	Ageing	0.738769	-0.204819	Up	Down	UpDown
ENSMUSG00000026620	Cortex	4.75509	Cortex	-0.954994	Development	-0.954994	-0.359288	Down	Down	DownDown
ENSMUSG00000026620	Cortex	4.75509	Cortex	-0.359288	Ageing	-0.954994	-0.359288	Down	Down	DownDown
ENSMUSG00000026608	Cortex	5.57917	Cortex	-0.630656	Development	-0.630656	0.131739	Down	Up	DownUp
ENSMUSG00000026608	Cortex	5.57917	Cortex	0.131739	Ageing	-0.630656	0.131739	Down	Up	DownUp
ENSMUSG00000016200	Cortex	5.30824	Cortex	-0.774806	Development	-0.774806	-0.574861	Down	Down	DownDown
ENSMUSG00000016200	Cortex	5.30824	Cortex	-0.574861	Ageing	-0.774806	-0.574861	Down	Down	DownDown
ENSMUSG00000026640	Cortex	5.30804	Cortex	-0.954994	Development	-0.954994	-0.610789	Down	Down	DownDown
ENSMUSG00000026640	Cortex	5.30804	Cortex	-0.610789	Ageing	-0.954994	-0.610789	Down	Down	DownDown
ENSMUSG00000019775	Cortex	16.0653	Cortex	0.342356	Development	0.342356	-0.467074	Up	Down	UpDown
ENSMUSG00000019775	Cortex	16.0653	Cortex	-0.467074	Ageing	0.342356	-0.467074	Up	Down	UpDown
ENSMUSG00000019796	Cortex	12.2634	Cortex	0.846881	Development	0.846881	-0.371264	Up	Down	UpDown
ENSMUSG00000019796	Cortex	12.2634	Cortex	-0.371264	Ageing	0.846881	-0.371264	Up	Down	UpDown
ENSMUSG00000019790	Cortex	7.38279	Cortex	0.846881	Development	0.846881	-0.80241	Up	Down	UpDown
ENSMUSG00000019790	Cortex	7.38279	Cortex	-0.80241	Ageing	0.846881	-0.80241	Up	Down	UpDown
ENSMUSG00000015501	Cortex	5.23206	Cortex	0.0900937	Development	0.0900937	-0.778457	Up	Down	UpDown
ENSMUSG00000015501	Cortex	5.23206	Cortex	-0.778457	Ageing	0.0900937	-0.778457	Up	Down	UpDown
ENSMUSG00000019852	Cortex	7.15621	Cortex	0.666694	Development	0.666694	-0.323359	Up	Down	UpDown
ENSMUSG00000019852	Cortex	7.15621	Cortex	-0.323359	Ageing	0.666694	-0.323359	Up	Down	UpDown
ENSMUSG00000019986	Cortex	9.99223	Cortex	0.14415	Development	0.14415	-0.419169	Up	Down	UpDown
ENSMUSG00000019986	Cortex	9.99223	Cortex	-0.419169	Ageing	0.14415	-0.419169	Up	Down	UpDown
ENSMUSG00000110723	Cortex	12.2588	Cortex	-0.828862	Development	-0.828862	0	Down	Down	DownDown
ENSMUSG00000110723	Cortex	12.2588	Cortex	0	Ageing	-0.828862	0	Down	Down	DownDown
ENSMUSG00000039697	Cortex	4.92942	Cortex	0.738769	Development	0.738769	-0.622766	Up	Down	UpDown
ENSMUSG00000039697	Cortex	4.92942	Cortex	-0.622766	Ageing	0.738769	-0.622766	Up	Down	UpDown
ENSMUSG00000069670	Cortex	13.5149	Cortex	-0.684712	Development	-0.684712	0.467074	Down	Up	DownUp
ENSMUSG00000069670	Cortex	13.5149	Cortex	0.467074	Ageing	-0.684712	0.467074	Down	Up	DownUp
ENSMUSG00000039485	Cortex	9.13649	Cortex	0.991031	Development	0.991031	-0.222892	Up	Down	UpDown
ENSMUSG00000039485	Cortex	9.13649	Cortex	-0.222892	Ageing	0.991031	-0.222892	Up	Down	UpDown
ENSMUSG00000019831	Cortex	16.0222	Cortex	0.216225	Development	0.216225	-0.0718576	Up	Down	UpDown
ENSMUSG00000019831	Cortex	16.0222	Cortex	-0.0718576	Ageing	0.216225	-0.0718576	Up	Down	UpDown
ENSMUSG00000071324	Cortex	6.49908	Cortex	-0.216225	Development	-0.216225	0.0718576	Down	Up	DownUp
ENSMUSG00000071324	Cortex	6.49908	Cortex	0.0718576	Ageing	-0.216225	0.0718576	Down	Up	DownUp
ENSMUSG00000056073	Cortex	16.8599	Cortex	-0.396412	Development	-0.396412	-0.227549	Down	Down	DownDown
ENSMUSG00000056073	Cortex	16.8599	Cortex	-0.227549	Ageing	-0.396412	-0.227549	Down	Down	DownDown
ENSMUSG00000038602	Cortex	9.77556	Cortex	-0.792825	Development	-0.792825	-0.131739	Down	Down	DownDown
ENSMUSG00000038602	Cortex	9.77556	Cortex	-0.131739	Ageing	-0.792825	-0.131739	Down	Down	DownDown
ENSMUSG00000019877	Cortex	4.6108	Cortex	0.774806	Development	0.774806	-0.373494	Up	Down	UpDown
ENSMUSG00000019877	Cortex	4.6108	Cortex	-0.373494	Ageing	0.774806	-0.373494	Up	Down	UpDown
ENSMUSG00000037990	Cortex	6.18469	Cortex	-0.666694	Development	-0.666694	-0.80241	Down	Down	DownDown
ENSMUSG00000037990	Cortex	6.18469	Cortex	-0.80241	Ageing	-0.666694	-0.80241	Down	Down	DownDown
ENSMUSG00000020083	Cortex	6.80399	Cortex	-0.792825	Development	-0.792825	0.371264	Down	Up	DownUp
ENSMUSG00000020083	Cortex	6.80399	Cortex	0.371264	Ageing	-0.792825	0.371264	Down	Up	DownUp
ENSMUSG00000020070	Cortex	7.73536	Cortex	-0.181818	Development	-0.181818	-0.586837	Down	Down	DownDown
ENSMUSG00000020070	Cortex	7.73536	Cortex	-0.586837	Ageing	-0.181818	-0.586837	Down	Down	DownDown
ENSMUSG00000037747	Cortex	19.6167	Cortex	0.882919	Development	0.882919	-0.215573	Up	Down	UpDown
ENSMUSG00000037747	Cortex	19.6167	Cortex	-0.215573	Ageing	0.882919	-0.215573	Up	Down	UpDown
ENSMUSG00000019923	Cortex	7.36758	Cortex	0.991031	Development	0.991031	-0.648346	Up	Down	UpDown
ENSMUSG00000019923	Cortex	7.36758	Cortex	-0.648346	Ageing	0.991031	-0.648346	Up	Down	UpDown
ENSMUSG00000040009	Cortex	12.1762	Cortex	-0.414431	Development	-0.414431	-0.0359288	Down	Down	DownDown
ENSMUSG00000040009	Cortex	12.1762	Cortex	-0.0359288	Ageing	-0.414431	-0.0359288	Down	Down	DownDown
ENSMUSG00000069601	Cortex	5.90192	Cortex	-0.738769	Development	-0.738769	-0.431145	Down	Down	DownDown
ENSMUSG00000069601	Cortex	5.90192	Cortex	-0.431145	Ageing	-0.738769	-0.431145	Down	Down	DownDown
ENSMUSG00000020284	Cortex	5.75647	Cortex	0.702731	Development	0.702731	0.179644	Up	Up	UpUp
ENSMUSG00000020284	Cortex	5.75647	Cortex	0.179644	Ageing	0.702731	0.179644	Up	Up	UpUp
ENSMUSG00000045912	Cortex	12.9385	Cortex	-0.43245	Development	-0.43245	0.227549	Down	Up	DownUp
ENSMUSG00000045912	Cortex	12.9385	Cortex	0.227549	Ageing	-0.43245	0.227549	Down	Up	DownUp
ENSMUSG00000020331	Cortex	7.6409	Cortex	0.954994	Development	0.954994	0.826362	Up	Up	UpUp
ENSMUSG00000020331	Cortex	7.6409	Cortex	0.826362	Ageing	0.954994	0.826362	Up	Up	UpUp
ENSMUSG00000035863	Cortex	4.74459	Cortex	-0.810844	Development	-0.810844	-0.347312	Down	Down	DownDown
ENSMUSG00000035863	Cortex	4.74459	Cortex	-0.347312	Ageing	-0.810844	-0.347312	Down	Down	DownDown
ENSMUSG00000035835	Cortex	4.59272	Cortex	-0.882919	Development	-0.882919	-0.311383	Down	Down	DownDown
ENSMUSG00000035835	Cortex	4.59272	Cortex	-0.311383	Ageing	-0.882919	-0.311383	Down	Down	DownDown
ENSMUSG00000035640	Cortex	11.0033	Cortex	0.872727	Development	0.872727	-0.407193	Up	Down	UpDown
ENSMUSG00000035640	Cortex	11.0033	Cortex	-0.407193	Ageing	0.872727	-0.407193	Up	Down	UpDown
ENSMUSG00000020135	Cortex	8.57829	Cortex	-0.954994	Development	-0.954994	0.562884	Down	Up	DownUp
ENSMUSG00000020135	Cortex	8.57829	Cortex	0.562884	Ageing	-0.954994	0.562884	Down	Up	DownUp
ENSMUSG00000043670	Cortex	31.3449	Cortex	0.558581	Development	0.558581	0.60241	Up	Up	UpUp
ENSMUSG00000043670	Cortex	31.3449	Cortex	0.60241	Ageing	0.558581	0.60241	Up	Up	UpUp
ENSMUSG00000048240	Cortex	11.2055	Cortex	0.450469	Development	0.450469	0.395217	Up	Up	UpUp
ENSMUSG00000048240	Cortex	11.2055	Cortex	0.395217	Ageing	0.450469	0.395217	Up	Up	UpUp
ENSMUSG00000034949	Cortex	6.45467	Cortex	0.936975	Development	0.936975	-0.263478	Up	Down	UpDown
ENSMUSG00000034949	Cortex	6.45467	Cortex	-0.263478	Ageing	0.936975	-0.263478	Up	Down	UpDown
ENSMUSG00000034958	Cortex	15.9751	Cortex	-0.918956	Development	-0.918956	-0.395217	Down	Down	DownDown
ENSMUSG00000034958	Cortex	15.9751	Cortex	-0.395217	Ageing	-0.918956	-0.395217	Down	Down	DownDown
ENSMUSG00000004933	Cortex	7.4958	Cortex	0.882919	Development	0.882919	0.526956	Up	Up	UpUp
ENSMUSG00000004933	Cortex	7.4958	Cortex	0.526956	Ageing	0.882919	0.526956	Up	Up	UpUp
ENSMUSG00000034902	Cortex	7.2548	Cortex	0.463636	Development	0.463636	-0.0598813	Up	Down	UpDown
ENSMUSG00000034902	Cortex	7.2548	Cortex	-0.0598813	Ageing	0.463636	-0.0598813	Up	Down	UpDown
ENSMUSG00000034818	Cortex	29.3897	Cortex	-0.828862	Development	-0.828862	-0.538932	Down	Down	DownDown
ENSMUSG00000034818	Cortex	29.3897	Cortex	-0.538932	Ageing	-0.828862	-0.538932	Down	Down	DownDown
ENSMUSG00000020042	Cortex	4.73706	Cortex	-0.918956	Development	-0.918956	0.179644	Down	Up	DownUp
ENSMUSG00000020042	Cortex	4.73706	Cortex	0.179644	Ageing	-0.918956	0.179644	Down	Up	DownUp
ENSMUSG00000059602	Cortex	8.28689	Cortex	-0.810844	Development	-0.810844	-0.455098	Down	Down	DownDown
ENSMUSG00000059602	Cortex	8.28689	Cortex	-0.455098	Ageing	-0.810844	-0.455098	Down	Down	DownDown
ENSMUSG00000035189	Cortex	7.52592	Cortex	0.414431	Development	0.414431	-0.658694	Up	Down	UpDown
ENSMUSG00000035189	Cortex	7.52592	Cortex	-0.658694	Ageing	0.414431	-0.658694	Up	Down	UpDown
ENSMUSG00000035311	Cortex	4.63471	Cortex	-0.756787	Development	-0.756787	-0.0838338	Down	Down	DownDown
ENSMUSG00000035311	Cortex	4.63471	Cortex	-0.0838338	Ageing	-0.756787	-0.0838338	Down	Down	DownDown
ENSMUSG00000020015	Cortex	6.38608	Cortex	0.738769	Development	0.738769	-0.514979	Up	Down	UpDown
ENSMUSG00000020015	Cortex	6.38608	Cortex	-0.514979	Ageing	0.738769	-0.514979	Up	Down	UpDown
ENSMUSG00000058589	Cortex	14.0701	Cortex	0.954994	Development	0.954994	-0.455098	Up	Down	UpDown
ENSMUSG00000058589	Cortex	14.0701	Cortex	-0.455098	Ageing	0.954994	-0.455098	Up	Down	UpDown
ENSMUSG00000019894	Cortex	7.1729	Cortex	-0.882919	Development	-0.882919	0.479051	Down	Up	DownUp
ENSMUSG00000019894	Cortex	7.1729	Cortex	0.479051	Ageing	-0.882919	0.479051	Down	Up	DownUp
ENSMUSG00000053825	Cortex	16.7194	Cortex	-0.810844	Development	-0.810844	-0.263478	Down	Down	DownDown
ENSMUSG00000053825	Cortex	16.7194	Cortex	-0.263478	Ageing	-0.810844	-0.263478	Down	Down	DownDown
ENSMUSG00000020181	Cortex	8.09761	Cortex	-0.342356	Development	-0.342356	-0.419169	Down	Down	DownDown
ENSMUSG00000020181	Cortex	8.09761	Cortex	-0.419169	Ageing	-0.342356	-0.419169	Down	Down	DownDown
ENSMUSG00000035864	Cortex	9.3045	Cortex	0.738769	Development	0.738769	-0.395217	Up	Down	UpDown
ENSMUSG00000035864	Cortex	9.3045	Cortex	-0.395217	Ageing	0.738769	-0.395217	Up	Down	UpDown
ENSMUSG00000035681	Cortex	7.10699	Cortex	0.846881	Development	0.846881	-0.0479051	Up	Down	UpDown
ENSMUSG00000035681	Cortex	7.10699	Cortex	-0.0479051	Ageing	0.846881	-0.0479051	Up	Down	UpDown
ENSMUSG00000050663	Cortex	7.49163	Cortex	0.126131	Development	0.126131	-0.467074	Up	Down	UpDown
ENSMUSG00000050663	Cortex	7.49163	Cortex	-0.467074	Ageing	0.126131	-0.467074	Up	Down	UpDown
ENSMUSG00000020151	Cortex	6.21099	Cortex	-0.180187	Development	-0.180187	0.179644	Down	Up	DownUp
ENSMUSG00000020151	Cortex	6.21099	Cortex	0.179644	Ageing	-0.180187	0.179644	Down	Up	DownUp
ENSMUSG00000054934	Cortex	7.77598	Cortex	0.0360375	Development	0.0360375	-0.311383	Up	Down	UpDown
ENSMUSG00000054934	Cortex	7.77598	Cortex	-0.311383	Ageing	0.0360375	-0.311383	Up	Down	UpDown
ENSMUSG00000034813	Cortex	4.71219	Cortex	-0.756787	Development	-0.756787	-0.790433	Down	Down	DownDown
ENSMUSG00000034813	Cortex	4.71219	Cortex	-0.790433	Ageing	-0.756787	-0.790433	Down	Down	DownDown
ENSMUSG00000034613	Cortex	5.94831	Cortex	0.396412	Development	0.396412	-0.838338	Up	Down	UpDown
ENSMUSG00000034613	Cortex	5.94831	Cortex	-0.838338	Ageing	0.396412	-0.838338	Up	Down	UpDown
ENSMUSG00000044071	Cortex	10.0819	Cortex	-0.954994	Development	-0.954994	-0.586837	Down	Down	DownDown
ENSMUSG00000044071	Cortex	10.0819	Cortex	-0.586837	Ageing	-0.954994	-0.586837	Down	Down	DownDown
ENSMUSG00000025422	Cortex	9.31043	Cortex	0.666694	Development	0.666694	-0.167668	Up	Down	UpDown
ENSMUSG00000025422	Cortex	9.31043	Cortex	-0.167668	Ageing	0.666694	-0.167668	Up	Down	UpDown
ENSMUSG00000074657	Cortex	10.6285	Cortex	0.991031	Development	0.991031	0.610789	Up	Up	UpUp
ENSMUSG00000074657	Cortex	10.6285	Cortex	0.610789	Ageing	0.991031	0.610789	Up	Up	UpUp
ENSMUSG00000025404	Cortex	4.5875	Cortex	0.738769	Development	0.738769	-0.562884	Up	Down	UpDown
ENSMUSG00000025404	Cortex	4.5875	Cortex	-0.562884	Ageing	0.738769	-0.562884	Up	Down	UpDown
ENSMUSG00000025369	Cortex	4.71983	Cortex	-0.630656	Development	-0.630656	-0.251502	Down	Down	DownDown
ENSMUSG00000025369	Cortex	4.71983	Cortex	-0.251502	Ageing	-0.630656	-0.251502	Down	Down	DownDown
ENSMUSG00000002578	Cortex	4.81666	Cortex	-0.936975	Development	-0.936975	-0.766481	Down	Down	DownDown
ENSMUSG00000002578	Cortex	4.81666	Cortex	-0.766481	Ageing	-0.936975	-0.766481	Down	Down	DownDown
ENSMUSG00000034579	Cortex	6.12909	Cortex	-0.2883	Development	-0.2883	-0.299407	Down	Down	DownDown
ENSMUSG00000034579	Cortex	6.12909	Cortex	-0.299407	Ageing	-0.2883	-0.299407	Down	Down	DownDown
ENSMUSG00000020435	Cortex	8.77353	Cortex	0.666694	Development	0.666694	0.107786	Up	Up	UpUp
ENSMUSG00000020435	Cortex	8.77353	Cortex	0.107786	Ageing	0.666694	0.107786	Up	Up	UpUp
ENSMUSG00000041164	Cortex	8.66778	Cortex	-0.954994	Development	-0.954994	0.107786	Down	Up	DownUp
ENSMUSG00000041164	Cortex	8.66778	Cortex	0.107786	Ageing	-0.954994	0.107786	Down	Up	DownUp
ENSMUSG00000041073	Cortex	5.99815	Cortex	-0.792825	Development	-0.792825	-0.646718	Down	Down	DownDown
ENSMUSG00000041073	Cortex	5.99815	Cortex	-0.646718	Ageing	-0.792825	-0.646718	Down	Down	DownDown
ENSMUSG00000020431	Cortex	11.2393	Cortex	-0.666694	Development	-0.666694	-0.0718576	Down	Down	DownDown
ENSMUSG00000020431	Cortex	11.2393	Cortex	-0.0718576	Ageing	-0.666694	-0.0718576	Down	Down	DownDown
ENSMUSG00000048834	Cortex	28.0667	Cortex	0.414431	Development	0.414431	-0.562884	Up	Down	UpDown
ENSMUSG00000048834	Cortex	28.0667	Cortex	-0.562884	Ageing	0.414431	-0.562884	Up	Down	UpDown
ENSMUSG00000044629	Cortex	6.66305	Cortex	-0.702731	Development	-0.702731	-0.610789	Down	Down	DownDown
ENSMUSG00000044629	Cortex	6.66305	Cortex	-0.610789	Ageing	-0.702731	-0.610789	Down	Down	DownDown
ENSMUSG00000000861	Cortex	4.86122	Cortex	-0.810844	Development	-0.810844	-0.203596	Down	Down	DownDown
ENSMUSG00000000861	Cortex	4.86122	Cortex	-0.203596	Ageing	-0.810844	-0.203596	Down	Down	DownDown
ENSMUSG00000032740	Cortex	5.34682	Cortex	-0.900937	Development	-0.900937	-0.80241	Down	Down	DownDown
ENSMUSG00000032740	Cortex	5.34682	Cortex	-0.80241	Ageing	-0.900937	-0.80241	Down	Down	DownDown
ENSMUSG00000044072	Cortex	5.50066	Cortex	0.486506	Development	0.486506	-0.790433	Up	Down	UpDown
ENSMUSG00000044072	Cortex	5.50066	Cortex	-0.790433	Ageing	0.486506	-0.790433	Up	Down	UpDown
ENSMUSG00000043999	Cortex	10.779	Cortex	0.846881	Development	0.846881	-0.0838338	Up	Down	UpDown
ENSMUSG00000043999	Cortex	10.779	Cortex	-0.0838338	Ageing	0.846881	-0.0838338	Up	Down	UpDown
ENSMUSG00000020297	Cortex	16.0553	Cortex	-0.792825	Development	-0.792825	-0.407193	Down	Down	DownDown
ENSMUSG00000020297	Cortex	16.0553	Cortex	-0.407193	Ageing	-0.792825	-0.407193	Down	Down	DownDown
ENSMUSG00000049336	Cortex	7.16916	Cortex	-0.828862	Development	-0.828862	-0.263478	Down	Down	DownDown
ENSMUSG00000049336	Cortex	7.16916	Cortex	-0.263478	Ageing	-0.828862	-0.263478	Down	Down	DownDown
ENSMUSG00000010803	Cortex	6.42697	Cortex	0.738769	Development	0.738769	0.0598813	Up	Up	UpUp
ENSMUSG00000010803	Cortex	6.42697	Cortex	0.0598813	Ageing	0.738769	0.0598813	Up	Up	UpUp
ENSMUSG00000007653	Cortex	17.3856	Cortex	0.270281	Development	0.270281	-0.538932	Up	Down	UpDown
ENSMUSG00000007653	Cortex	17.3856	Cortex	-0.538932	Ageing	0.270281	-0.538932	Up	Down	UpDown
ENSMUSG00000020340	Cortex	6.45761	Cortex	0.846881	Development	0.846881	0.0119763	Up	Up	UpUp
ENSMUSG00000020340	Cortex	6.45761	Cortex	0.0119763	Ageing	0.846881	0.0119763	Up	Up	UpUp
ENSMUSG00000020374	Cortex	12.201	Cortex	0.846881	Development	0.846881	0.38324	Up	Up	UpUp
ENSMUSG00000020374	Cortex	12.201	Cortex	0.38324	Ageing	0.846881	0.38324	Up	Up	UpUp
ENSMUSG00000018395	Cortex	9.45074	Cortex	-0.792825	Development	-0.792825	-0.80241	Down	Down	DownDown
ENSMUSG00000018395	Cortex	9.45074	Cortex	-0.80241	Ageing	-0.792825	-0.80241	Down	Down	DownDown
ENSMUSG00000020524	Cortex	7.82455	Cortex	0.954994	Development	0.954994	-0.503003	Up	Down	UpDown
ENSMUSG00000020524	Cortex	7.82455	Cortex	-0.503003	Ageing	0.954994	-0.503003	Up	Down	UpDown
ENSMUSG00000009894	Cortex	6.36213	Cortex	0.702731	Development	0.702731	0.107786	Up	Up	UpUp
ENSMUSG00000009894	Cortex	6.36213	Cortex	0.107786	Ageing	0.702731	0.107786	Up	Up	UpUp
ENSMUSG00000010086	Cortex	7.29028	Cortex	0.954994	Development	0.954994	0.359288	Up	Up	UpUp
ENSMUSG00000010086	Cortex	7.29028	Cortex	0.359288	Ageing	0.954994	0.359288	Up	Up	UpUp
ENSMUSG00000042506	Cortex	4.8162	Cortex	-0.991031	Development	-0.991031	-0.155691	Down	Down	DownDown
ENSMUSG00000042506	Cortex	4.8162	Cortex	-0.155691	Ageing	-0.991031	-0.155691	Down	Down	DownDown
ENSMUSG00000005267	Cortex	5.91761	Cortex	-0.936975	Development	-0.936975	-0.467074	Down	Down	DownDown
ENSMUSG00000005267	Cortex	5.91761	Cortex	-0.467074	Ageing	-0.936975	-0.467074	Down	Down	DownDown
ENSMUSG00000053930	Cortex	4.77336	Cortex	-0.738769	Development	-0.738769	-0.263478	Down	Down	DownDown
ENSMUSG00000053930	Cortex	4.77336	Cortex	-0.263478	Ageing	-0.738769	-0.263478	Down	Down	DownDown
ENSMUSG00000033066	Cortex	8.44489	Cortex	0.2883	Development	0.2883	-0.359288	Up	Down	UpDown
ENSMUSG00000033066	Cortex	8.44489	Cortex	-0.359288	Ageing	0.2883	-0.359288	Up	Down	UpDown
ENSMUSG00000020894	Cortex	5.66353	Cortex	0.709091	Development	0.709091	-0.251502	Up	Down	UpDown
ENSMUSG00000020894	Cortex	5.66353	Cortex	-0.251502	Ageing	0.709091	-0.251502	Up	Down	UpDown
ENSMUSG00000043419	Cortex	6.96299	Cortex	0.684712	Development	0.684712	-0.28743	Up	Down	UpDown
ENSMUSG00000043419	Cortex	6.96299	Cortex	-0.28743	Ageing	0.684712	-0.28743	Up	Down	UpDown
ENSMUSG00000003934	Cortex	8.62616	Cortex	-0.738769	Development	-0.738769	0.323359	Down	Up	DownUp
ENSMUSG00000003934	Cortex	8.62616	Cortex	0.323359	Ageing	-0.738769	0.323359	Down	Up	DownUp
ENSMUSG00000018501	Cortex	4.50916	Cortex	-0.774806	Development	-0.774806	-0.694623	Down	Down	DownDown
ENSMUSG00000018501	Cortex	4.50916	Cortex	-0.694623	Ageing	-0.774806	-0.694623	Down	Down	DownDown
ENSMUSG00000020886	Cortex	5.70689	Cortex	0.666694	Development	0.666694	-0.789157	Up	Down	UpDown
ENSMUSG00000020886	Cortex	5.70689	Cortex	-0.789157	Ageing	0.666694	-0.789157	Up	Down	UpDown
ENSMUSG00000020807	Cortex	8.29603	Cortex	0.396412	Development	0.396412	-0.706599	Up	Down	UpDown
ENSMUSG00000020807	Cortex	8.29603	Cortex	-0.706599	Ageing	0.396412	-0.706599	Up	Down	UpDown
ENSMUSG00000038807	Cortex	6.12511	Cortex	0.738769	Development	0.738769	-0.179644	Up	Down	UpDown
ENSMUSG00000038807	Cortex	6.12511	Cortex	-0.179644	Ageing	0.738769	-0.179644	Up	Down	UpDown
ENSMUSG00000000282	Cortex	5.58378	Cortex	-0.666694	Development	-0.666694	0.682647	Down	Up	DownUp
ENSMUSG00000000282	Cortex	5.58378	Cortex	0.682647	Ageing	-0.666694	0.682647	Down	Up	DownUp
ENSMUSG00000038351	Cortex	5.42103	Cortex	0.810844	Development	0.810844	0.443122	Up	Up	UpUp
ENSMUSG00000038351	Cortex	5.42103	Cortex	0.443122	Ageing	0.810844	0.443122	Up	Up	UpUp
ENSMUSG00000020848	Cortex	7.60432	Cortex	-0.0540562	Development	-0.0540562	0.131739	Down	Up	DownUp
ENSMUSG00000020848	Cortex	7.60432	Cortex	0.131739	Ageing	-0.0540562	0.131739	Down	Up	DownUp
ENSMUSG00000020849	Cortex	4.65811	Cortex	-0.882919	Development	-0.882919	-0.861446	Down	Down	DownDown
ENSMUSG00000020849	Cortex	4.65811	Cortex	-0.861446	Ageing	-0.882919	-0.861446	Down	Down	DownDown
ENSMUSG00000050944	Cortex	5.41943	Cortex	0.522544	Development	0.522544	-0.730552	Up	Down	UpDown
ENSMUSG00000050944	Cortex	5.41943	Cortex	-0.730552	Ageing	0.522544	-0.730552	Up	Down	UpDown
ENSMUSG00000017631	Cortex	4.8266	Cortex	0.702731	Development	0.702731	-0.910196	Up	Down	UpDown
ENSMUSG00000017631	Cortex	4.8266	Cortex	-0.910196	Ageing	0.702731	-0.910196	Up	Down	UpDown
ENSMUSG00000037907	Cortex	5.49287	Cortex	-0.954994	Development	-0.954994	0.385542	Down	Up	DownUp
ENSMUSG00000037907	Cortex	5.49287	Cortex	0.385542	Ageing	-0.954994	0.385542	Down	Up	DownUp
ENSMUSG00000000632	Cortex	19.8913	Cortex	-0.846881	Development	-0.846881	-0.526956	Down	Down	DownDown
ENSMUSG00000000632	Cortex	19.8913	Cortex	-0.526956	Ageing	-0.846881	-0.526956	Down	Down	DownDown
ENSMUSG00000050132	Cortex	8.85807	Cortex	-0.991031	Development	-0.991031	-0.467074	Down	Down	DownDown
ENSMUSG00000050132	Cortex	8.85807	Cortex	-0.467074	Ageing	-0.991031	-0.467074	Down	Down	DownDown
ENSMUSG00000049612	Cortex	5.42605	Cortex	0.846881	Development	0.846881	0.347312	Up	Up	UpUp
ENSMUSG00000049612	Cortex	5.42605	Cortex	0.347312	Ageing	0.846881	0.347312	Up	Up	UpUp
ENSMUSG00000017639	Cortex	5.29449	Cortex	0.846881	Development	0.846881	-0.0239525	Up	Down	UpDown
ENSMUSG00000017639	Cortex	5.29449	Cortex	-0.0239525	Ageing	0.846881	-0.0239525	Up	Down	UpDown
ENSMUSG00000048895	Cortex	17.3942	Cortex	-0.900937	Development	-0.900937	0.155691	Down	Up	DownUp
ENSMUSG00000048895	Cortex	17.3942	Cortex	0.155691	Ageing	-0.900937	0.155691	Down	Up	DownUp
ENSMUSG00000020704	Cortex	13.4075	Cortex	0.630656	Development	0.630656	0.227549	Up	Up	UpUp
ENSMUSG00000020704	Cortex	13.4075	Cortex	0.227549	Ageing	0.630656	0.227549	Up	Up	UpUp
ENSMUSG00000020684	Cortex	15.1389	Cortex	0.991031	Development	0.991031	0.0598813	Up	Up	UpUp
ENSMUSG00000020684	Cortex	15.1389	Cortex	0.0598813	Ageing	0.991031	0.0598813	Up	Up	UpUp
ENSMUSG00000035152	Cortex	4.80296	Cortex	-0.666694	Development	-0.666694	-0.826362	Down	Down	DownDown
ENSMUSG00000035152	Cortex	4.80296	Cortex	-0.826362	Ageing	-0.666694	-0.826362	Down	Down	DownDown
ENSMUSG00000018548	Cortex	8.62189	Cortex	0.684712	Development	0.684712	0	Up	Down	UpDown
ENSMUSG00000018548	Cortex	8.62189	Cortex	0	Ageing	0.684712	0	Up	Down	UpDown
ENSMUSG00000046442	Cortex	11.8794	Cortex	0.594619	Development	0.594619	-0.514979	Up	Down	UpDown
ENSMUSG00000046442	Cortex	11.8794	Cortex	-0.514979	Ageing	0.594619	-0.514979	Up	Down	UpDown
ENSMUSG00000034156	Cortex	8.51049	Cortex	0.540562	Development	0.540562	-0.107786	Up	Down	UpDown
ENSMUSG00000034156	Cortex	8.51049	Cortex	-0.107786	Ageing	0.540562	-0.107786	Up	Down	UpDown
ENSMUSG00000000276	Cortex	5.33497	Cortex	0.666694	Development	0.666694	-0.275454	Up	Down	UpDown
ENSMUSG00000000276	Cortex	5.33497	Cortex	-0.275454	Ageing	0.666694	-0.275454	Up	Down	UpDown
ENSMUSG00000046719	Cortex	6.94932	Cortex	-0.774806	Development	-0.774806	-0.119763	Down	Down	DownDown
ENSMUSG00000046719	Cortex	6.94932	Cortex	-0.119763	Ageing	-0.774806	-0.119763	Down	Down	DownDown
ENSMUSG00000038453	Cortex	9.09854	Cortex	0.666694	Development	0.666694	0.263478	Up	Up	UpUp
ENSMUSG00000038453	Cortex	9.09854	Cortex	0.263478	Ageing	0.666694	0.263478	Up	Up	UpUp
ENSMUSG00000018547	Cortex	4.80271	Cortex	-0.900937	Development	-0.900937	-0.407193	Down	Down	DownDown
ENSMUSG00000018547	Cortex	4.80271	Cortex	-0.407193	Ageing	-0.900937	-0.407193	Down	Down	DownDown
ENSMUSG00000050538	Cortex	7.41027	Cortex	0.954994	Development	0.954994	0.203596	Up	Up	UpUp
ENSMUSG00000050538	Cortex	7.41027	Cortex	0.203596	Ageing	0.954994	0.203596	Up	Up	UpUp
ENSMUSG00000017400	Cortex	4.47406	Cortex	0.846881	Development	0.846881	0.503003	Up	Up	UpUp
ENSMUSG00000017400	Cortex	4.47406	Cortex	0.503003	Ageing	0.846881	0.503003	Up	Up	UpUp
ENSMUSG00000045007	Cortex	9.17828	Cortex	0.882919	Development	0.882919	0.455098	Up	Up	UpUp
ENSMUSG00000045007	Cortex	9.17828	Cortex	0.455098	Ageing	0.882919	0.455098	Up	Up	UpUp
ENSMUSG00000019302	Cortex	6.06589	Cortex	0.738769	Development	0.738769	-0.850315	Up	Down	UpDown
ENSMUSG00000019302	Cortex	6.06589	Cortex	-0.850315	Ageing	0.738769	-0.850315	Up	Down	UpDown
ENSMUSG00000001313	Cortex	4.84673	Cortex	0.991031	Development	0.991031	0.467074	Up	Up	UpUp
ENSMUSG00000001313	Cortex	4.84673	Cortex	0.467074	Ageing	0.991031	0.467074	Up	Up	UpUp
ENSMUSG00000059995	Cortex	5.17772	Cortex	0.0900937	Development	0.0900937	0.0119763	Up	Up	UpUp
ENSMUSG00000059995	Cortex	5.17772	Cortex	0.0119763	Ageing	0.0900937	0.0119763	Up	Up	UpUp
ENSMUSG00000006575	Cortex	8.63826	Cortex	0.900937	Development	0.900937	-0.251502	Up	Down	UpDown
ENSMUSG00000006575	Cortex	8.63826	Cortex	-0.251502	Ageing	0.900937	-0.251502	Up	Down	UpDown
ENSMUSG00000020926	Cortex	8.86974	Cortex	0.558581	Development	0.558581	0.0838338	Up	Up	UpUp
ENSMUSG00000020926	Cortex	8.86974	Cortex	0.0838338	Ageing	0.558581	0.0838338	Up	Up	UpUp
ENSMUSG00000046215	Cortex	6.20836	Cortex	0.666694	Development	0.666694	0.395217	Up	Up	UpUp
ENSMUSG00000046215	Cortex	6.20836	Cortex	0.395217	Ageing	0.666694	0.395217	Up	Up	UpUp
ENSMUSG00000020932	Cortex	4.64438	Cortex	0.954994	Development	0.954994	0.610789	Up	Up	UpUp
ENSMUSG00000020932	Cortex	4.64438	Cortex	0.610789	Ageing	0.954994	0.610789	Up	Up	UpUp
ENSMUSG00000034187	Cortex	5.89997	Cortex	0.846881	Development	0.846881	-0.610789	Up	Down	UpDown
ENSMUSG00000034187	Cortex	5.89997	Cortex	-0.610789	Ageing	0.846881	-0.610789	Up	Down	UpDown
ENSMUSG00000018412	Cortex	4.60554	Cortex	-0.072075	Development	-0.072075	0.215573	Down	Up	DownUp
ENSMUSG00000018412	Cortex	4.60554	Cortex	0.215573	Ageing	-0.072075	0.215573	Down	Up	DownUp
ENSMUSG00000053580	Cortex	7.79792	Cortex	-0.882919	Development	-0.882919	-0.742528	Down	Down	DownDown
ENSMUSG00000053580	Cortex	7.79792	Cortex	-0.742528	Ageing	-0.882919	-0.742528	Down	Down	DownDown
ENSMUSG00000020723	Cortex	7.04347	Cortex	-0.882919	Development	-0.882919	-0.0598813	Down	Down	DownDown
ENSMUSG00000020723	Cortex	7.04347	Cortex	-0.0598813	Ageing	-0.882919	-0.0598813	Down	Down	DownDown
ENSMUSG00000059923	Cortex	5.26224	Cortex	-0.594619	Development	-0.594619	-0.610789	Down	Down	DownDown
ENSMUSG00000059923	Cortex	5.26224	Cortex	-0.610789	Ageing	-0.594619	-0.610789	Down	Down	DownDown
ENSMUSG00000020740	Cortex	5.1845	Cortex	0.666694	Development	0.666694	0.0240964	Up	Up	UpUp
ENSMUSG00000020740	Cortex	5.1845	Cortex	0.0240964	Ageing	0.666694	0.0240964	Up	Up	UpUp
ENSMUSG00000052949	Cortex	4.60439	Cortex	0.828862	Development	0.828862	0.0119763	Up	Up	UpUp
ENSMUSG00000052949	Cortex	4.60439	Cortex	0.0119763	Ageing	0.828862	0.0119763	Up	Up	UpUp
ENSMUSG00000043857	Cortex	20.0213	Cortex	-0.936364	Development	-0.936364	0.0598813	Down	Up	DownUp
ENSMUSG00000043857	Cortex	20.0213	Cortex	0.0598813	Ageing	-0.936364	0.0598813	Down	Up	DownUp
ENSMUSG00000025571	Cortex	7.38308	Cortex	-0.72075	Development	-0.72075	0.0119763	Down	Up	DownUp
ENSMUSG00000025571	Cortex	7.38308	Cortex	0.0119763	Ageing	-0.72075	0.0119763	Down	Up	DownUp
ENSMUSG00000025576	Cortex	15.4813	Cortex	0.846881	Development	0.846881	0.203596	Up	Up	UpUp
ENSMUSG00000025576	Cortex	15.4813	Cortex	0.203596	Ageing	0.846881	0.203596	Up	Up	UpUp
ENSMUSG00000025375	Cortex	5.8522	Cortex	0.954994	Development	0.954994	0.730552	Up	Up	UpUp
ENSMUSG00000025375	Cortex	5.8522	Cortex	0.730552	Ageing	0.954994	0.730552	Up	Up	UpUp
ENSMUSG00000025158	Cortex	7.76763	Cortex	-0.738769	Development	-0.738769	-0.299407	Down	Down	DownDown
ENSMUSG00000025158	Cortex	7.76763	Cortex	-0.299407	Ageing	-0.738769	-0.299407	Down	Down	DownDown
ENSMUSG00000039275	Cortex	4.80192	Cortex	-0.882919	Development	-0.882919	-0.706599	Down	Down	DownDown
ENSMUSG00000039275	Cortex	4.80192	Cortex	-0.706599	Ageing	-0.882919	-0.706599	Down	Down	DownDown
ENSMUSG00000020658	Cortex	6.9579	Cortex	-0.648675	Development	-0.648675	-0.407193	Down	Down	DownDown
ENSMUSG00000020658	Cortex	6.9579	Cortex	-0.407193	Ageing	-0.648675	-0.407193	Down	Down	DownDown
ENSMUSG00000020668	Cortex	4.49368	Cortex	-0.792825	Development	-0.792825	-0.503003	Down	Down	DownDown
ENSMUSG00000020668	Cortex	4.49368	Cortex	-0.503003	Ageing	-0.792825	-0.503003	Down	Down	DownDown
ENSMUSG00000020647	Cortex	4.74372	Cortex	-0.414431	Development	-0.414431	-0.562884	Down	Down	DownDown
ENSMUSG00000020647	Cortex	4.74372	Cortex	-0.562884	Ageing	-0.414431	-0.562884	Down	Down	DownDown
ENSMUSG00000020639	Cortex	5.50157	Cortex	0.414431	Development	0.414431	0.0958101	Up	Up	UpUp
ENSMUSG00000020639	Cortex	5.50157	Cortex	0.0958101	Ageing	0.414431	0.0958101	Up	Up	UpUp
ENSMUSG00000020635	Cortex	4.86278	Cortex	-0.666694	Development	-0.666694	-0.215573	Down	Down	DownDown
ENSMUSG00000020635	Cortex	4.86278	Cortex	-0.215573	Ageing	-0.666694	-0.215573	Down	Down	DownDown
ENSMUSG00000020627	Cortex	10.0462	Cortex	-0.414431	Development	-0.414431	-0.850315	Down	Down	DownDown
ENSMUSG00000020627	Cortex	10.0462	Cortex	-0.850315	Ageing	-0.414431	-0.850315	Down	Down	DownDown
ENSMUSG00000054459	Cortex	4.92974	Cortex	0.738769	Development	0.738769	0.0958101	Up	Up	UpUp
ENSMUSG00000054459	Cortex	4.92974	Cortex	0.0958101	Ageing	0.738769	0.0958101	Up	Up	UpUp
ENSMUSG00000020589	Cortex	6.63214	Cortex	-0.991031	Development	-0.991031	-0.706599	Down	Down	DownDown
ENSMUSG00000020589	Cortex	6.63214	Cortex	-0.706599	Ageing	-0.991031	-0.706599	Down	Down	DownDown
ENSMUSG00000051726	Cortex	4.80024	Cortex	0.774806	Development	0.774806	-0.455098	Up	Down	UpDown
ENSMUSG00000051726	Cortex	4.80024	Cortex	-0.455098	Ageing	0.774806	-0.455098	Up	Down	UpDown
ENSMUSG00000036333	Cortex	6.46248	Cortex	-0.630656	Development	-0.630656	-0.335335	Down	Down	DownDown
ENSMUSG00000036333	Cortex	6.46248	Cortex	-0.335335	Ageing	-0.630656	-0.335335	Down	Down	DownDown
ENSMUSG00000061911	Cortex	19.777	Cortex	-0.882919	Development	-0.882919	-0.622766	Down	Down	DownDown
ENSMUSG00000061911	Cortex	19.777	Cortex	-0.622766	Ageing	-0.882919	-0.622766	Down	Down	DownDown
ENSMUSG00000004698	Cortex	7.81577	Cortex	0.0900937	Development	0.0900937	-0.838338	Up	Down	UpDown
ENSMUSG00000004698	Cortex	7.81577	Cortex	-0.838338	Ageing	0.0900937	-0.838338	Up	Down	UpDown
ENSMUSG00000036295	Cortex	7.80375	Cortex	-0.702731	Development	-0.702731	-0.155691	Down	Down	DownDown
ENSMUSG00000036295	Cortex	7.80375	Cortex	-0.155691	Ageing	-0.702731	-0.155691	Down	Down	DownDown
ENSMUSG00000021010	Cortex	5.65829	Cortex	-0.612637	Development	-0.612637	0.179644	Down	Up	DownUp
ENSMUSG00000021010	Cortex	5.65829	Cortex	0.179644	Ageing	-0.612637	0.179644	Down	Up	DownUp
ENSMUSG00000061603	Cortex	5.06181	Cortex	0.486506	Development	0.486506	-0.467074	Up	Down	UpDown
ENSMUSG00000061603	Cortex	5.06181	Cortex	-0.467074	Ageing	0.486506	-0.467074	Up	Down	UpDown
ENSMUSG00000021071	Cortex	15.548	Cortex	0.774806	Development	0.774806	-0.766481	Up	Down	UpDown
ENSMUSG00000021071	Cortex	15.548	Cortex	-0.766481	Ageing	0.774806	-0.766481	Up	Down	UpDown
ENSMUSG00000020990	Cortex	9.39051	Cortex	-0.666694	Development	-0.666694	0.0718576	Down	Up	DownUp
ENSMUSG00000020990	Cortex	9.39051	Cortex	0.0718576	Ageing	-0.666694	0.0718576	Down	Up	DownUp
ENSMUSG00000021066	Cortex	13.4276	Cortex	0.630656	Development	0.630656	-0.311383	Up	Down	UpDown
ENSMUSG00000021066	Cortex	13.4276	Cortex	-0.311383	Ageing	0.630656	-0.311383	Up	Down	UpDown
ENSMUSG00000043398	Cortex	5.04824	Cortex	-0.378394	Development	-0.378394	0.646718	Down	Up	DownUp
ENSMUSG00000043398	Cortex	5.04824	Cortex	0.646718	Ageing	-0.378394	0.646718	Down	Up	DownUp
ENSMUSG00000034501	Cortex	4.69008	Cortex	-0.126131	Development	-0.126131	-0.586837	Down	Down	DownDown
ENSMUSG00000034501	Cortex	4.69008	Cortex	-0.586837	Ageing	-0.126131	-0.586837	Down	Down	DownDown
ENSMUSG00000021087	Cortex	14.5397	Cortex	-0.4	Development	-0.4	-0.413706	Down	Down	DownDown
ENSMUSG00000021087	Cortex	14.5397	Cortex	-0.413706	Ageing	-0.4	-0.413706	Down	Down	DownDown
ENSMUSG00000042724	Cortex	6.05587	Cortex	-0.936975	Development	-0.936975	-0.538932	Down	Down	DownDown
ENSMUSG00000042724	Cortex	6.05587	Cortex	-0.538932	Ageing	-0.936975	-0.538932	Down	Down	DownDown
ENSMUSG00000021219	Cortex	6.55292	Cortex	-0.0900937	Development	-0.0900937	-0.0718576	Down	Down	DownDown
ENSMUSG00000021219	Cortex	6.55292	Cortex	-0.0718576	Ageing	-0.0900937	-0.0718576	Down	Down	DownDown
ENSMUSG00000019235	Cortex	6.8309	Cortex	0.0180187	Development	0.0180187	-0.215573	Up	Down	UpDown
ENSMUSG00000019235	Cortex	6.8309	Cortex	-0.215573	Ageing	0.0180187	-0.215573	Up	Down	UpDown
ENSMUSG00000034145	Cortex	17.7558	Cortex	0.666694	Development	0.666694	-0.0239525	Up	Down	UpDown
ENSMUSG00000034145	Cortex	17.7558	Cortex	-0.0239525	Ageing	0.666694	-0.0239525	Up	Down	UpDown
ENSMUSG00000066392	Cortex	12.7766	Cortex	0.882919	Development	0.882919	-0.766481	Up	Down	UpDown
ENSMUSG00000066392	Cortex	12.7766	Cortex	-0.766481	Ageing	0.882919	-0.766481	Up	Down	UpDown
ENSMUSG00000021007	Cortex	6.64138	Cortex	-0.396412	Development	-0.396412	0.395217	Down	Up	DownUp
ENSMUSG00000021007	Cortex	6.64138	Cortex	0.395217	Ageing	-0.396412	0.395217	Down	Up	DownUp
ENSMUSG00000051166	Cortex	6.76372	Cortex	0.396412	Development	0.396412	-0.455098	Up	Down	UpDown
ENSMUSG00000051166	Cortex	6.76372	Cortex	-0.455098	Ageing	0.396412	-0.455098	Up	Down	UpDown
ENSMUSG00000021194	Cortex	12.26	Cortex	0.918956	Development	0.918956	-0.179644	Up	Down	UpDown
ENSMUSG00000021194	Cortex	12.26	Cortex	-0.179644	Ageing	0.918956	-0.179644	Up	Down	UpDown
ENSMUSG00000021198	Cortex	15.0728	Cortex	0.702731	Development	0.702731	-0.766481	Up	Down	UpDown
ENSMUSG00000021198	Cortex	15.0728	Cortex	-0.766481	Ageing	0.702731	-0.766481	Up	Down	UpDown
ENSMUSG00000094910	Cortex	5.67044	Cortex	-0.846881	Development	-0.846881	-0.251502	Down	Down	DownDown
ENSMUSG00000094910	Cortex	5.67044	Cortex	-0.251502	Ageing	-0.846881	-0.251502	Down	Down	DownDown
ENSMUSG00000048251	Cortex	8.4461	Cortex	-0.684712	Development	-0.684712	0.299407	Down	Up	DownUp
ENSMUSG00000048251	Cortex	8.4461	Cortex	0.299407	Ageing	-0.684712	0.299407	Down	Up	DownUp
ENSMUSG00000021259	Cortex	6.06188	Cortex	0.882919	Development	0.882919	-0.0120482	Up	Down	UpDown
ENSMUSG00000021259	Cortex	6.06188	Cortex	-0.0120482	Ageing	0.882919	-0.0120482	Up	Down	UpDown
ENSMUSG00000040867	Cortex	6.59391	Cortex	0.684712	Development	0.684712	0.467074	Up	Up	UpUp
ENSMUSG00000040867	Cortex	6.59391	Cortex	0.467074	Ageing	0.684712	0.467074	Up	Up	UpUp
ENSMUSG00000017843	Cortex	5.2325	Cortex	0.810844	Development	0.810844	0.371264	Up	Up	UpUp
ENSMUSG00000017843	Cortex	5.2325	Cortex	0.371264	Ageing	0.810844	0.371264	Up	Up	UpUp
ENSMUSG00000018707	Cortex	5.04162	Cortex	-0.43245	Development	-0.43245	0.107786	Down	Up	DownUp
ENSMUSG00000018707	Cortex	5.04162	Cortex	0.107786	Ageing	-0.43245	0.107786	Down	Up	DownUp
ENSMUSG00000054013	Cortex	12.2809	Cortex	0.738769	Development	0.738769	0.670671	Up	Up	UpUp
ENSMUSG00000054013	Cortex	12.2809	Cortex	0.670671	Ageing	0.738769	0.670671	Up	Up	UpUp
ENSMUSG00000021288	Cortex	4.58592	Cortex	0.324337	Development	0.324337	-0.503153	Up	Down	UpDown
ENSMUSG00000021288	Cortex	4.58592	Cortex	-0.503153	Ageing	0.324337	-0.503153	Up	Down	UpDown
ENSMUSG00000049036	Cortex	4.63321	Cortex	-0.666694	Development	-0.666694	0.419169	Down	Up	DownUp
ENSMUSG00000049036	Cortex	4.63321	Cortex	0.419169	Ageing	-0.666694	0.419169	Down	Up	DownUp
ENSMUSG00000056553	Cortex	14.9561	Cortex	0.666694	Development	0.666694	-0.742528	Up	Down	UpDown
ENSMUSG00000056553	Cortex	14.9561	Cortex	-0.742528	Ageing	0.666694	-0.742528	Up	Down	UpDown
ENSMUSG00000025321	Cortex	9.09918	Cortex	0.0900937	Development	0.0900937	-0.634742	Up	Down	UpDown
ENSMUSG00000025321	Cortex	9.09918	Cortex	-0.634742	Ageing	0.0900937	-0.634742	Up	Down	UpDown
ENSMUSG00000048264	Cortex	5.00055	Cortex	-0.882919	Development	-0.882919	-0.766481	Down	Down	DownDown
ENSMUSG00000048264	Cortex	5.00055	Cortex	-0.766481	Ageing	-0.882919	-0.766481	Down	Down	DownDown
ENSMUSG00000021196	Cortex	5.44667	Cortex	-0.756787	Development	-0.756787	-0.620482	Down	Down	DownDown
ENSMUSG00000021196	Cortex	5.44667	Cortex	-0.620482	Ageing	-0.756787	-0.620482	Down	Down	DownDown
ENSMUSG00000046159	Cortex	4.73443	Cortex	0.738769	Development	0.738769	0.0359288	Up	Up	UpUp
ENSMUSG00000046159	Cortex	4.73443	Cortex	0.0359288	Ageing	0.738769	0.0359288	Up	Up	UpUp
ENSMUSG00000021313	Cortex	6.78789	Cortex	0.882919	Development	0.882919	-0.754505	Up	Down	UpDown
ENSMUSG00000021313	Cortex	6.78789	Cortex	-0.754505	Ageing	0.882919	-0.754505	Up	Down	UpDown
ENSMUSG00000021303	Cortex	8.66052	Cortex	-0.234244	Development	-0.234244	-0.227549	Down	Down	DownDown
ENSMUSG00000021303	Cortex	8.66052	Cortex	-0.227549	Ageing	-0.234244	-0.227549	Down	Down	DownDown
ENSMUSG00000041236	Cortex	5.90603	Cortex	0.810844	Development	0.810844	-0.706599	Up	Down	UpDown
ENSMUSG00000041236	Cortex	5.90603	Cortex	-0.706599	Ageing	0.810844	-0.706599	Up	Down	UpDown
ENSMUSG00000021314	Cortex	5.40291	Cortex	0.378394	Development	0.378394	-0.646718	Up	Down	UpDown
ENSMUSG00000021314	Cortex	5.40291	Cortex	-0.646718	Ageing	0.378394	-0.646718	Up	Down	UpDown
ENSMUSG00000048978	Cortex	6.06365	Cortex	0.954994	Development	0.954994	-0.706599	Up	Down	UpDown
ENSMUSG00000048978	Cortex	6.06365	Cortex	-0.706599	Ageing	0.954994	-0.706599	Up	Down	UpDown
ENSMUSG00000058672	Cortex	5.09014	Cortex	-0.709091	Development	-0.709091	-0.766481	Down	Down	DownDown
ENSMUSG00000058672	Cortex	5.09014	Cortex	-0.766481	Ageing	-0.709091	-0.766481	Down	Down	DownDown
ENSMUSG00000054728	Cortex	4.40867	Cortex	0.954994	Development	0.954994	0.180723	Up	Up	UpUp
ENSMUSG00000054728	Cortex	4.40867	Cortex	0.180723	Ageing	0.954994	0.180723	Up	Up	UpUp
ENSMUSG00000047842	Cortex	9.25911	Cortex	0.630656	Development	0.630656	0.203596	Up	Up	UpUp
ENSMUSG00000047842	Cortex	9.25911	Cortex	0.203596	Ageing	0.630656	0.203596	Up	Up	UpUp
ENSMUSG00000025867	Cortex	10.8501	Cortex	0.954994	Development	0.954994	0.347312	Up	Up	UpUp
ENSMUSG00000025867	Cortex	10.8501	Cortex	0.347312	Ageing	0.954994	0.347312	Up	Up	UpUp
ENSMUSG00000034891	Cortex	11.9508	Cortex	0.738769	Development	0.738769	0.259036	Up	Up	UpUp
ENSMUSG00000034891	Cortex	11.9508	Cortex	0.259036	Ageing	0.738769	0.259036	Up	Up	UpUp
ENSMUSG00000069227	Cortex	13.1235	Cortex	-0.991031	Development	-0.991031	-0.407193	Down	Down	DownDown
ENSMUSG00000069227	Cortex	13.1235	Cortex	-0.407193	Ageing	-0.991031	-0.407193	Down	Down	DownDown
ENSMUSG00000025876	Cortex	4.81861	Cortex	0.954994	Development	0.954994	0.251502	Up	Up	UpUp
ENSMUSG00000025876	Cortex	4.81861	Cortex	0.251502	Ageing	0.954994	0.251502	Up	Up	UpUp
ENSMUSG00000034686	Cortex	4.58876	Cortex	0.486506	Development	0.486506	0.562884	Up	Up	UpUp
ENSMUSG00000034686	Cortex	4.58876	Cortex	0.562884	Ageing	0.486506	0.562884	Up	Up	UpUp
ENSMUSG00000056222	Cortex	26.256	Cortex	0.486506	Development	0.486506	0.203596	Up	Up	UpUp
ENSMUSG00000056222	Cortex	26.256	Cortex	0.203596	Ageing	0.486506	0.203596	Up	Up	UpUp
ENSMUSG00000055254	Cortex	6.35104	Cortex	0.954994	Development	0.954994	-0.371264	Up	Down	UpDown
ENSMUSG00000055254	Cortex	6.35104	Cortex	-0.371264	Ageing	0.954994	-0.371264	Up	Down	UpDown
ENSMUSG00000021557	Cortex	5.14268	Cortex	-0.342356	Development	-0.342356	-0.503003	Down	Down	DownDown
ENSMUSG00000021557	Cortex	5.14268	Cortex	-0.503003	Ageing	-0.342356	-0.503003	Down	Down	DownDown
ENSMUSG00000052981	Cortex	17.6407	Cortex	-0.2883	Development	-0.2883	0.0598813	Down	Up	DownUp
ENSMUSG00000052981	Cortex	17.6407	Cortex	0.0598813	Ageing	-0.2883	0.0598813	Down	Up	DownUp
ENSMUSG00000069171	Cortex	4.96493	Cortex	-0.936975	Development	-0.936975	-0.323359	Down	Down	DownDown
ENSMUSG00000069171	Cortex	4.96493	Cortex	-0.323359	Ageing	-0.936975	-0.323359	Down	Down	DownDown
ENSMUSG00000051098	Cortex	4.5386	Cortex	-0.792825	Development	-0.792825	-0.38324	Down	Down	DownDown
ENSMUSG00000051098	Cortex	4.5386	Cortex	-0.38324	Ageing	-0.792825	-0.38324	Down	Down	DownDown
ENSMUSG00000051111	Cortex	6.18923	Cortex	0.954994	Development	0.954994	0.203596	Up	Up	UpUp
ENSMUSG00000051111	Cortex	6.18923	Cortex	0.203596	Ageing	0.954994	0.203596	Up	Up	UpUp
ENSMUSG00000041817	Cortex	12.8688	Cortex	-0.198206	Development	-0.198206	-0.395217	Down	Down	DownDown
ENSMUSG00000041817	Cortex	12.8688	Cortex	-0.395217	Ageing	-0.198206	-0.395217	Down	Down	DownDown
ENSMUSG00000041773	Cortex	8.69136	Cortex	-0.846881	Development	-0.846881	-0.299407	Down	Down	DownDown
ENSMUSG00000041773	Cortex	8.69136	Cortex	-0.299407	Ageing	-0.846881	-0.299407	Down	Down	DownDown
ENSMUSG00000042743	Cortex	6.3474	Cortex	0.846881	Development	0.846881	0.227549	Up	Up	UpUp
ENSMUSG00000042743	Cortex	6.3474	Cortex	0.227549	Ageing	0.846881	0.227549	Up	Up	UpUp
ENSMUSG00000021719	Cortex	6.07494	Cortex	0.882919	Development	0.882919	0.0718576	Up	Up	UpUp
ENSMUSG00000021719	Cortex	6.07494	Cortex	0.0718576	Ageing	0.882919	0.0718576	Up	Up	UpUp
ENSMUSG00000021720	Cortex	8.51451	Cortex	-0.828862	Development	-0.828862	-0.658694	Down	Down	DownDown
ENSMUSG00000021720	Cortex	8.51451	Cortex	-0.658694	Ageing	-0.828862	-0.658694	Down	Down	DownDown
ENSMUSG00000052727	Cortex	9.0422	Cortex	-0.846881	Development	-0.846881	-0.826362	Down	Down	DownDown
ENSMUSG00000052727	Cortex	9.0422	Cortex	-0.826362	Ageing	-0.846881	-0.826362	Down	Down	DownDown
ENSMUSG00000021700	Cortex	18.8878	Cortex	0.954994	Development	0.954994	-0.598813	Up	Down	UpDown
ENSMUSG00000021700	Cortex	18.8878	Cortex	-0.598813	Ageing	0.954994	-0.598813	Up	Down	UpDown
ENSMUSG00000021730	Cortex	7.12781	Cortex	0.738769	Development	0.738769	-0.538932	Up	Down	UpDown
ENSMUSG00000021730	Cortex	7.12781	Cortex	-0.538932	Ageing	0.738769	-0.538932	Up	Down	UpDown
ENSMUSG00000056296	Cortex	11.138	Cortex	0.738769	Development	0.738769	-0.514979	Up	Down	UpDown
ENSMUSG00000056296	Cortex	11.138	Cortex	-0.514979	Ageing	0.738769	-0.514979	Up	Down	UpDown
ENSMUSG00000054423	Cortex	20.5751	Cortex	0.738769	Development	0.738769	-0.550908	Up	Down	UpDown
ENSMUSG00000054423	Cortex	20.5751	Cortex	-0.550908	Ageing	0.738769	-0.550908	Up	Down	UpDown
ENSMUSG00000045201	Cortex	5.34181	Cortex	0.828862	Development	0.828862	-0.215573	Up	Down	UpDown
ENSMUSG00000045201	Cortex	5.34181	Cortex	-0.215573	Ageing	0.828862	-0.215573	Up	Down	UpDown
ENSMUSG00000021991	Cortex	8.27567	Cortex	0.882919	Development	0.882919	0.0119763	Up	Up	UpUp
ENSMUSG00000021991	Cortex	8.27567	Cortex	0.0119763	Ageing	0.882919	0.0119763	Up	Up	UpUp
ENSMUSG00000040640	Cortex	5.28806	Cortex	-0.342356	Development	-0.342356	-0.754505	Down	Down	DownDown
ENSMUSG00000040640	Cortex	5.28806	Cortex	-0.754505	Ageing	-0.342356	-0.754505	Down	Down	DownDown
ENSMUSG00000021901	Cortex	5.2159	Cortex	0.774806	Development	0.774806	0.0301205	Up	Up	UpUp
ENSMUSG00000021901	Cortex	5.2159	Cortex	0.0301205	Ageing	0.774806	0.0301205	Up	Up	UpUp
ENSMUSG00000021913	Cortex	5.59036	Cortex	0.991031	Development	0.991031	0.742528	Up	Up	UpUp
ENSMUSG00000021913	Cortex	5.59036	Cortex	0.742528	Ageing	0.991031	0.742528	Up	Up	UpUp
ENSMUSG00000041078	Cortex	11.1841	Cortex	0.846881	Development	0.846881	0.622766	Up	Up	UpUp
ENSMUSG00000041078	Cortex	11.1841	Cortex	0.622766	Ageing	0.846881	0.622766	Up	Up	UpUp
ENSMUSG00000049092	Cortex	5.95463	Cortex	0.792825	Development	0.792825	-0.778457	Up	Down	UpDown
ENSMUSG00000049092	Cortex	5.95463	Cortex	-0.778457	Ageing	0.792825	-0.778457	Up	Down	UpDown
ENSMUSG00000049532	Cortex	5.29677	Cortex	-0.846881	Development	-0.846881	-0.28743	Down	Down	DownDown
ENSMUSG00000049532	Cortex	5.29677	Cortex	-0.28743	Ageing	-0.846881	-0.28743	Down	Down	DownDown
ENSMUSG00000022211	Cortex	9.85889	Cortex	-0.792825	Development	-0.792825	-0.275454	Down	Down	DownDown
ENSMUSG00000022211	Cortex	9.85889	Cortex	-0.275454	Ageing	-0.792825	-0.275454	Down	Down	DownDown
ENSMUSG00000022212	Cortex	9.16436	Cortex	0.738769	Development	0.738769	-0.407193	Up	Down	UpDown
ENSMUSG00000022212	Cortex	9.16436	Cortex	-0.407193	Ageing	0.738769	-0.407193	Up	Down	UpDown
ENSMUSG00000022208	Cortex	19.0495	Cortex	-0.594619	Development	-0.594619	0.443122	Down	Up	DownUp
ENSMUSG00000022208	Cortex	19.0495	Cortex	0.443122	Ageing	-0.594619	0.443122	Down	Up	DownUp
ENSMUSG00000021986	Cortex	5.22025	Cortex	-0.8649	Development	-0.8649	-0.491027	Down	Down	DownDown
ENSMUSG00000021986	Cortex	5.22025	Cortex	-0.491027	Ageing	-0.8649	-0.491027	Down	Down	DownDown
ENSMUSG00000048279	Cortex	5.67865	Cortex	-0.630656	Development	-0.630656	-0.38324	Down	Down	DownDown
ENSMUSG00000048279	Cortex	5.67865	Cortex	-0.38324	Ageing	-0.630656	-0.38324	Down	Down	DownDown
ENSMUSG00000035078	Cortex	4.62292	Cortex	-0.756787	Development	-0.756787	-0.754505	Down	Down	DownDown
ENSMUSG00000035078	Cortex	4.62292	Cortex	-0.754505	Ageing	-0.756787	-0.754505	Down	Down	DownDown
ENSMUSG00000007989	Cortex	6.39207	Cortex	-0.666694	Development	-0.666694	-0.670671	Down	Down	DownDown
ENSMUSG00000007989	Cortex	6.39207	Cortex	-0.670671	Ageing	-0.666694	-0.670671	Down	Down	DownDown
ENSMUSG00000022044	Cortex	11.5971	Cortex	-0.936975	Development	-0.936975	-0.0239525	Down	Down	DownDown
ENSMUSG00000022044	Cortex	11.5971	Cortex	-0.0239525	Ageing	-0.936975	-0.0239525	Down	Down	DownDown
ENSMUSG00000022054	Cortex	9.42169	Cortex	0.882919	Development	0.882919	0.419169	Up	Up	UpUp
ENSMUSG00000022054	Cortex	9.42169	Cortex	0.419169	Ageing	0.882919	0.419169	Up	Up	UpUp
ENSMUSG00000022055	Cortex	10.7776	Cortex	0.630656	Development	0.630656	0.503003	Up	Up	UpUp
ENSMUSG00000022055	Cortex	10.7776	Cortex	0.503003	Ageing	0.630656	0.503003	Up	Up	UpUp
ENSMUSG00000034997	Cortex	5.32683	Cortex	0.882919	Development	0.882919	-0.299407	Up	Down	UpDown
ENSMUSG00000034997	Cortex	5.32683	Cortex	-0.299407	Ageing	0.882919	-0.299407	Up	Down	UpDown
ENSMUSG00000052584	Cortex	13.9469	Cortex	0.504525	Development	0.504525	0.359288	Up	Up	UpUp
ENSMUSG00000052584	Cortex	13.9469	Cortex	0.359288	Ageing	0.504525	0.359288	Up	Up	UpUp
ENSMUSG00000022012	Cortex	6.00273	Cortex	-0.756787	Development	-0.756787	-0.227549	Down	Down	DownDown
ENSMUSG00000022012	Cortex	6.00273	Cortex	-0.227549	Ageing	-0.756787	-0.227549	Down	Down	DownDown
ENSMUSG00000050505	Cortex	5.25692	Cortex	0.540562	Development	0.540562	-0.574861	Up	Down	UpDown
ENSMUSG00000050505	Cortex	5.25692	Cortex	-0.574861	Ageing	0.540562	-0.574861	Up	Down	UpDown
ENSMUSG00000055421	Cortex	14.1999	Cortex	0.342356	Development	0.342356	-0.0359288	Up	Down	UpDown
ENSMUSG00000055421	Cortex	14.1999	Cortex	-0.0359288	Ageing	0.342356	-0.0359288	Up	Down	UpDown
ENSMUSG00000055717	Cortex	11.3943	Cortex	-0.666694	Development	-0.666694	0.514979	Down	Up	DownUp
ENSMUSG00000055717	Cortex	11.3943	Cortex	0.514979	Ageing	-0.666694	0.514979	Down	Up	DownUp
ENSMUSG00000033004	Cortex	6.44054	Cortex	-0.954994	Development	-0.954994	-0.407193	Down	Down	DownDown
ENSMUSG00000033004	Cortex	6.44054	Cortex	-0.407193	Ageing	-0.954994	-0.407193	Down	Down	DownDown
ENSMUSG00000033214	Cortex	34.8565	Cortex	0.2883	Development	0.2883	-0.275454	Up	Down	UpDown
ENSMUSG00000033214	Cortex	34.8565	Cortex	-0.275454	Ageing	0.2883	-0.275454	Up	Down	UpDown
ENSMUSG00000042156	Cortex	5.65869	Cortex	-0.738769	Development	-0.738769	0.359288	Down	Up	DownUp
ENSMUSG00000042156	Cortex	5.65869	Cortex	0.359288	Ageing	-0.738769	0.359288	Down	Up	DownUp
ENSMUSG00000000197	Cortex	10.4533	Cortex	0.666694	Development	0.666694	-0.814386	Up	Down	UpDown
ENSMUSG00000000197	Cortex	10.4533	Cortex	-0.814386	Ageing	0.666694	-0.814386	Up	Down	UpDown
ENSMUSG00000025551	Cortex	11.3991	Cortex	0.666694	Development	0.666694	0.0838338	Up	Up	UpUp
ENSMUSG00000025551	Cortex	11.3991	Cortex	0.0838338	Ageing	0.666694	0.0838338	Up	Up	UpUp
ENSMUSG00000039801	Cortex	5.82508	Cortex	-0.2883	Development	-0.2883	-0.239525	Down	Down	DownDown
ENSMUSG00000039801	Cortex	5.82508	Cortex	-0.239525	Ageing	-0.2883	-0.239525	Down	Down	DownDown
ENSMUSG00000005360	Cortex	6.69596	Cortex	0.954994	Development	0.954994	-0.138554	Up	Down	UpDown
ENSMUSG00000005360	Cortex	6.69596	Cortex	-0.138554	Ageing	0.954994	-0.138554	Up	Down	UpDown
ENSMUSG00000022201	Cortex	5.1551	Cortex	0.594619	Development	0.594619	-0.778457	Up	Down	UpDown
ENSMUSG00000022201	Cortex	5.1551	Cortex	-0.778457	Ageing	0.594619	-0.778457	Up	Down	UpDown
ENSMUSG00000039385	Cortex	8.02801	Cortex	-0.666694	Development	-0.666694	-0.610789	Down	Down	DownDown
ENSMUSG00000039385	Cortex	8.02801	Cortex	-0.610789	Ageing	-0.666694	-0.610789	Down	Down	DownDown
ENSMUSG00000022321	Cortex	31.407	Cortex	-0.414431	Development	-0.414431	-0.359288	Down	Down	DownDown
ENSMUSG00000022321	Cortex	31.407	Cortex	-0.359288	Ageing	-0.414431	-0.359288	Down	Down	DownDown
ENSMUSG00000022191	Cortex	4.43017	Cortex	-0.630656	Development	-0.630656	-0.19162	Down	Down	DownDown
ENSMUSG00000022191	Cortex	4.43017	Cortex	-0.19162	Ageing	-0.630656	-0.19162	Down	Down	DownDown
ENSMUSG00000045763	Cortex	6.38687	Cortex	-0.702731	Development	-0.702731	-0.19162	Down	Down	DownDown
ENSMUSG00000045763	Cortex	6.38687	Cortex	-0.19162	Ageing	-0.702731	-0.19162	Down	Down	DownDown
ENSMUSG00000022263	Cortex	4.87815	Cortex	-0.666694	Development	-0.666694	-0.718576	Down	Down	DownDown
ENSMUSG00000022263	Cortex	4.87815	Cortex	-0.718576	Ageing	-0.666694	-0.718576	Down	Down	DownDown
ENSMUSG00000022240	Cortex	14.0237	Cortex	-0.540562	Development	-0.540562	-0.646718	Down	Down	DownDown
ENSMUSG00000022240	Cortex	14.0237	Cortex	-0.646718	Ageing	-0.540562	-0.646718	Down	Down	DownDown
ENSMUSG00000038984	Cortex	12.4466	Cortex	0.774806	Development	0.774806	0.107786	Up	Up	UpUp
ENSMUSG00000038984	Cortex	12.4466	Cortex	0.107786	Ageing	0.774806	0.107786	Up	Up	UpUp
ENSMUSG00000037386	Cortex	11.7565	Cortex	0.738769	Development	0.738769	-0.371264	Up	Down	UpDown
ENSMUSG00000037386	Cortex	11.7565	Cortex	-0.371264	Ageing	0.738769	-0.371264	Up	Down	UpDown
ENSMUSG00000022305	Cortex	4.96327	Cortex	-0.810844	Development	-0.810844	-0.503003	Down	Down	DownDown
ENSMUSG00000022305	Cortex	4.96327	Cortex	-0.503003	Ageing	-0.810844	-0.503003	Down	Down	DownDown
ENSMUSG00000022340	Cortex	5.44618	Cortex	-0.954994	Development	-0.954994	-0.19162	Down	Down	DownDown
ENSMUSG00000022340	Cortex	5.44618	Cortex	-0.19162	Ageing	-0.954994	-0.19162	Down	Down	DownDown
ENSMUSG00000056258	Cortex	18.49	Cortex	0.486506	Development	0.486506	0.347312	Up	Up	UpUp
ENSMUSG00000056258	Cortex	18.49	Cortex	0.347312	Ageing	0.486506	0.347312	Up	Up	UpUp
ENSMUSG00000022332	Cortex	6.72375	Cortex	-0.882919	Development	-0.882919	-0.0718576	Down	Down	DownDown
ENSMUSG00000022332	Cortex	6.72375	Cortex	-0.0718576	Ageing	-0.882919	-0.0718576	Down	Down	DownDown
ENSMUSG00000022580	Cortex	4.55334	Cortex	0.954994	Development	0.954994	0.263478	Up	Up	UpUp
ENSMUSG00000022580	Cortex	4.55334	Cortex	0.263478	Ageing	0.954994	0.263478	Up	Up	UpUp
ENSMUSG00000034730	Cortex	15.9635	Cortex	0.991031	Development	0.991031	-0.0838338	Up	Down	UpDown
ENSMUSG00000034730	Cortex	15.9635	Cortex	-0.0838338	Ageing	0.991031	-0.0838338	Up	Down	UpDown
ENSMUSG00000022577	Cortex	12.7013	Cortex	-0.360375	Development	-0.360375	-0.120482	Down	Down	DownDown
ENSMUSG00000022577	Cortex	12.7013	Cortex	-0.120482	Ageing	-0.360375	-0.120482	Down	Down	DownDown
ENSMUSG00000004187	Cortex	6.6993	Cortex	0.846881	Development	0.846881	0.682647	Up	Up	UpUp
ENSMUSG00000004187	Cortex	6.6993	Cortex	0.682647	Ageing	0.846881	0.682647	Up	Up	UpUp
ENSMUSG00000033697	Cortex	8.08355	Cortex	-0.991031	Development	-0.991031	-0.167668	Down	Down	DownDown
ENSMUSG00000033697	Cortex	8.08355	Cortex	-0.167668	Ageing	-0.991031	-0.167668	Down	Down	DownDown
ENSMUSG00000016552	Cortex	7.51859	Cortex	-0.882919	Development	-0.882919	0.299407	Down	Up	DownUp
ENSMUSG00000016552	Cortex	7.51859	Cortex	0.299407	Ageing	-0.882919	0.299407	Down	Up	DownUp
ENSMUSG00000044933	Cortex	5.18388	Cortex	0.738769	Development	0.738769	0.311383	Up	Up	UpUp
ENSMUSG00000044933	Cortex	5.18388	Cortex	0.311383	Ageing	0.738769	0.311383	Up	Up	UpUp
ENSMUSG00000022428	Cortex	6.70435	Cortex	-0.702731	Development	-0.702731	0.610789	Down	Up	DownUp
ENSMUSG00000022428	Cortex	6.70435	Cortex	0.610789	Ageing	-0.702731	0.610789	Down	Up	DownUp
ENSMUSG00000022421	Cortex	7.44003	Cortex	0.846881	Development	0.846881	-0.538932	Up	Down	UpDown
ENSMUSG00000022421	Cortex	7.44003	Cortex	-0.538932	Ageing	0.846881	-0.538932	Up	Down	UpDown
ENSMUSG00000089837	Cortex	4.45065	Cortex	0	Development	0	0.155691	Down	Up	DownUp
ENSMUSG00000089837	Cortex	4.45065	Cortex	0.155691	Ageing	0	0.155691	Down	Up	DownUp
ENSMUSG00000022416	Cortex	9.36712	Cortex	0.630656	Development	0.630656	-0.526956	Up	Down	UpDown
ENSMUSG00000022416	Cortex	9.36712	Cortex	-0.526956	Ageing	0.630656	-0.526956	Up	Down	UpDown
ENSMUSG00000042109	Cortex	4.81538	Cortex	-0.522544	Development	-0.522544	-0.251502	Down	Down	DownDown
ENSMUSG00000042109	Cortex	4.81538	Cortex	-0.251502	Ageing	-0.522544	-0.251502	Down	Down	DownDown
ENSMUSG00000041852	Cortex	4.64354	Cortex	-0.666694	Development	-0.666694	-0.359288	Down	Down	DownDown
ENSMUSG00000041852	Cortex	4.64354	Cortex	-0.359288	Ageing	-0.666694	-0.359288	Down	Down	DownDown
ENSMUSG00000022456	Cortex	21.3536	Cortex	-0.991031	Development	-0.991031	-0.313253	Down	Down	DownDown
ENSMUSG00000022456	Cortex	21.3536	Cortex	-0.313253	Ageing	-0.991031	-0.313253	Down	Down	DownDown
ENSMUSG00000022442	Cortex	6.12859	Cortex	-0.846881	Development	-0.846881	0.419169	Down	Up	DownUp
ENSMUSG00000022442	Cortex	6.12859	Cortex	0.419169	Ageing	-0.846881	0.419169	Down	Up	DownUp
ENSMUSG00000016763	Cortex	5.73651	Cortex	-0.0900937	Development	-0.0900937	-0.682647	Down	Down	DownDown
ENSMUSG00000016763	Cortex	5.73651	Cortex	-0.682647	Ageing	-0.0900937	-0.682647	Down	Down	DownDown
ENSMUSG00000018865	Cortex	13.6831	Cortex	0.846881	Development	0.846881	0.0240964	Up	Up	UpUp
ENSMUSG00000018865	Cortex	13.6831	Cortex	0.0240964	Ageing	0.846881	0.0240964	Up	Up	UpUp
ENSMUSG00000018040	Cortex	4.5746	Cortex	0.882919	Development	0.882919	0.107786	Up	Up	UpUp
ENSMUSG00000018040	Cortex	4.5746	Cortex	0.107786	Ageing	0.882919	0.107786	Up	Up	UpUp
ENSMUSG00000055745	Cortex	8.44717	Cortex	-0.702731	Development	-0.702731	-0.538932	Down	Down	DownDown
ENSMUSG00000055745	Cortex	8.44717	Cortex	-0.538932	Ageing	-0.702731	-0.538932	Down	Down	DownDown
ENSMUSG00000016624	Cortex	6.86973	Cortex	-0.306319	Development	-0.306319	0.407193	Down	Up	DownUp
ENSMUSG00000016624	Cortex	6.86973	Cortex	0.407193	Ageing	-0.306319	0.407193	Down	Up	DownUp
ENSMUSG00000041708	Cortex	11.6759	Cortex	-0.954994	Development	-0.954994	0.0119763	Down	Up	DownUp
ENSMUSG00000041708	Cortex	11.6759	Cortex	0.0119763	Ageing	-0.954994	0.0119763	Down	Up	DownUp
ENSMUSG00000054863	Cortex	5.8743	Cortex	0.954994	Development	0.954994	0.0359288	Up	Up	UpUp
ENSMUSG00000054863	Cortex	5.8743	Cortex	0.0359288	Ageing	0.954994	0.0359288	Up	Up	UpUp
ENSMUSG00000058441	Cortex	11.0911	Cortex	0.846881	Development	0.846881	0.934148	Up	Up	UpUp
ENSMUSG00000058441	Cortex	11.0911	Cortex	0.934148	Ageing	0.846881	0.934148	Up	Up	UpUp
ENSMUSG00000022619	Cortex	35.9497	Cortex	0.900937	Development	0.900937	0.491027	Up	Up	UpUp
ENSMUSG00000022619	Cortex	35.9497	Cortex	0.491027	Ageing	0.900937	0.491027	Up	Up	UpUp
ENSMUSG00000036218	Cortex	6.60239	Cortex	-0.684712	Development	-0.684712	-0.706599	Down	Down	DownDown
ENSMUSG00000036218	Cortex	6.60239	Cortex	-0.706599	Ageing	-0.684712	-0.706599	Down	Down	DownDown
ENSMUSG00000022634	Cortex	5.67608	Cortex	0.702731	Development	0.702731	0.347312	Up	Up	UpUp
ENSMUSG00000022634	Cortex	5.67608	Cortex	0.347312	Ageing	0.702731	0.347312	Up	Up	UpUp
ENSMUSG00000055022	Cortex	20.9764	Cortex	-0.0900937	Development	-0.0900937	-0.706599	Down	Down	DownDown
ENSMUSG00000055022	Cortex	20.9764	Cortex	-0.706599	Ageing	-0.0900937	-0.706599	Down	Down	DownDown
ENSMUSG00000022454	Cortex	29.7257	Cortex	-0.14415	Development	-0.14415	-0.646718	Down	Down	DownDown
ENSMUSG00000022454	Cortex	29.7257	Cortex	-0.646718	Ageing	-0.14415	-0.646718	Down	Down	DownDown
ENSMUSG00000023169	Cortex	6.18335	Cortex	-0.666694	Development	-0.666694	-0.514979	Down	Down	DownDown
ENSMUSG00000023169	Cortex	6.18335	Cortex	-0.514979	Ageing	-0.666694	-0.514979	Down	Down	DownDown
ENSMUSG00000029875	Cortex	7.78954	Cortex	-0.630656	Development	-0.630656	0.0838338	Down	Up	DownUp
ENSMUSG00000029875	Cortex	7.78954	Cortex	0.0838338	Ageing	-0.630656	0.0838338	Down	Up	DownUp
ENSMUSG00000059213	Cortex	5.20681	Cortex	0.954994	Development	0.954994	0.0120482	Up	Up	UpUp
ENSMUSG00000059213	Cortex	5.20681	Cortex	0.0120482	Ageing	0.954994	0.0120482	Up	Up	UpUp
ENSMUSG00000037579	Cortex	5.97463	Cortex	0.738769	Development	0.738769	0.646718	Up	Up	UpUp
ENSMUSG00000037579	Cortex	5.97463	Cortex	0.646718	Ageing	0.738769	0.646718	Up	Up	UpUp
ENSMUSG00000023011	Cortex	5.51922	Cortex	0.954994	Development	0.954994	0.155691	Up	Up	UpUp
ENSMUSG00000023011	Cortex	5.51922	Cortex	0.155691	Ageing	0.954994	0.155691	Up	Up	UpUp
ENSMUSG00000023017	Cortex	17.3933	Cortex	-0.882919	Development	-0.882919	0.215573	Down	Up	DownUp
ENSMUSG00000023017	Cortex	17.3933	Cortex	0.215573	Ageing	-0.882919	0.215573	Down	Up	DownUp
ENSMUSG00000023018	Cortex	5.67949	Cortex	0.324337	Development	0.324337	-0.0718576	Up	Down	UpDown
ENSMUSG00000023018	Cortex	5.67949	Cortex	-0.0718576	Ageing	0.324337	-0.0718576	Up	Down	UpDown
ENSMUSG00000044636	Cortex	5.48489	Cortex	-0.954994	Development	-0.954994	-0.299407	Down	Down	DownDown
ENSMUSG00000044636	Cortex	5.48489	Cortex	-0.299407	Ageing	-0.954994	-0.299407	Down	Down	DownDown
ENSMUSG00000023032	Cortex	6.47579	Cortex	0.324337	Development	0.324337	-0.443122	Up	Down	UpDown
ENSMUSG00000023032	Cortex	6.47579	Cortex	-0.443122	Ageing	0.324337	-0.443122	Up	Down	UpDown
ENSMUSG00000009739	Cortex	5.62228	Cortex	-0.558581	Development	-0.558581	-0.19162	Down	Down	DownDown
ENSMUSG00000009739	Cortex	5.62228	Cortex	-0.19162	Ageing	-0.558581	-0.19162	Down	Down	DownDown
ENSMUSG00000023033	Cortex	7.93338	Cortex	0.846881	Development	0.846881	-0.0359288	Up	Down	UpDown
ENSMUSG00000023033	Cortex	7.93338	Cortex	-0.0359288	Ageing	0.846881	-0.0359288	Up	Down	UpDown
ENSMUSG00000036966	Cortex	4.68189	Cortex	0.738769	Development	0.738769	0.431145	Up	Up	UpUp
ENSMUSG00000036966	Cortex	4.68189	Cortex	0.431145	Ageing	0.738769	0.431145	Up	Up	UpUp
ENSMUSG00000023050	Cortex	7.01931	Cortex	0.504525	Development	0.504525	-0.0598813	Up	Down	UpDown
ENSMUSG00000023050	Cortex	7.01931	Cortex	-0.0598813	Ageing	0.504525	-0.0598813	Up	Down	UpDown
ENSMUSG00000022489	Cortex	5.40595	Cortex	0.936975	Development	0.936975	0.455098	Up	Up	UpUp
ENSMUSG00000022489	Cortex	5.40595	Cortex	0.455098	Ageing	0.936975	0.455098	Up	Up	UpUp
ENSMUSG00000022517	Cortex	4.70383	Cortex	0.792825	Development	0.792825	0.562884	Up	Up	UpUp
ENSMUSG00000022517	Cortex	4.70383	Cortex	0.562884	Ageing	0.792825	0.562884	Up	Up	UpUp
ENSMUSG00000050908	Cortex	6.29298	Cortex	-0.936975	Development	-0.936975	0.119763	Down	Up	DownUp
ENSMUSG00000050908	Cortex	6.29298	Cortex	0.119763	Ageing	-0.936975	0.119763	Down	Up	DownUp
ENSMUSG00000022494	Cortex	14.1705	Cortex	0.954994	Development	0.954994	-0.0598813	Up	Down	UpDown
ENSMUSG00000022494	Cortex	14.1705	Cortex	-0.0598813	Ageing	0.954994	-0.0598813	Up	Down	UpDown
ENSMUSG00000022545	Cortex	4.87185	Cortex	0.666694	Development	0.666694	-0.0598813	Up	Down	UpDown
ENSMUSG00000022545	Cortex	4.87185	Cortex	-0.0598813	Ageing	0.666694	-0.0598813	Up	Down	UpDown
ENSMUSG00000044117	Cortex	37.9465	Cortex	0.14415	Development	0.14415	0	Up	Down	UpDown
ENSMUSG00000044117	Cortex	37.9465	Cortex	0	Ageing	0.14415	0	Up	Down	UpDown
ENSMUSG00000022789	Cortex	4.98591	Cortex	0.684712	Development	0.684712	-0.634742	Up	Down	UpDown
ENSMUSG00000022789	Cortex	4.98591	Cortex	-0.634742	Ageing	0.684712	-0.634742	Up	Down	UpDown
ENSMUSG00000022773	Cortex	4.93222	Cortex	-0.991031	Development	-0.991031	-0.419169	Down	Down	DownDown
ENSMUSG00000022773	Cortex	4.93222	Cortex	-0.419169	Ageing	-0.991031	-0.419169	Down	Down	DownDown
ENSMUSG00000055692	Cortex	5.91652	Cortex	0.738769	Development	0.738769	0.718576	Up	Up	UpUp
ENSMUSG00000055692	Cortex	5.91652	Cortex	0.718576	Ageing	0.738769	0.718576	Up	Up	UpUp
ENSMUSG00000043811	Cortex	5.60794	Cortex	0.630656	Development	0.630656	0.491027	Up	Up	UpUp
ENSMUSG00000043811	Cortex	5.60794	Cortex	0.491027	Ageing	0.630656	0.491027	Up	Up	UpUp
ENSMUSG00000072214	Cortex	5.94043	Cortex	0.846881	Development	0.846881	0.203596	Up	Up	UpUp
ENSMUSG00000072214	Cortex	5.94043	Cortex	0.203596	Ageing	0.846881	0.203596	Up	Up	UpUp
ENSMUSG00000041205	Cortex	4.74115	Cortex	0.738769	Development	0.738769	0.323359	Up	Up	UpUp
ENSMUSG00000041205	Cortex	4.74115	Cortex	0.323359	Ageing	0.738769	0.323359	Up	Up	UpUp
ENSMUSG00000022702	Cortex	4.5916	Cortex	-0.954994	Development	-0.954994	-0.119763	Down	Down	DownDown
ENSMUSG00000022702	Cortex	4.5916	Cortex	-0.119763	Ageing	-0.954994	-0.119763	Down	Down	DownDown
ENSMUSG00000046613	Cortex	15.4587	Cortex	0.666694	Development	0.666694	0.38324	Up	Up	UpUp
ENSMUSG00000046613	Cortex	15.4587	Cortex	0.38324	Ageing	0.666694	0.38324	Up	Up	UpUp
ENSMUSG00000051146	Cortex	12.2938	Cortex	-0.666694	Development	-0.666694	0.754505	Down	Up	DownUp
ENSMUSG00000051146	Cortex	12.2938	Cortex	0.754505	Ageing	-0.666694	0.754505	Down	Up	DownUp
ENSMUSG00000022841	Cortex	5.00994	Cortex	-0.756787	Development	-0.756787	-0.650602	Down	Down	DownDown
ENSMUSG00000022841	Cortex	5.00994	Cortex	-0.650602	Ageing	-0.756787	-0.650602	Down	Down	DownDown
ENSMUSG00000033653	Cortex	5.38812	Cortex	-0.648675	Development	-0.648675	0.359288	Down	Up	DownUp
ENSMUSG00000033653	Cortex	5.38812	Cortex	0.359288	Ageing	-0.648675	0.359288	Down	Up	DownUp
ENSMUSG00000022861	Cortex	6.01181	Cortex	0.900937	Development	0.900937	-0.227549	Up	Down	UpDown
ENSMUSG00000022861	Cortex	6.01181	Cortex	-0.227549	Ageing	0.900937	-0.227549	Up	Down	UpDown
ENSMUSG00000004366	Cortex	12.6603	Cortex	0.954994	Development	0.954994	0.5	Up	Up	UpUp
ENSMUSG00000004366	Cortex	12.6603	Cortex	0.5	Ageing	0.954994	0.5	Up	Up	UpUp
ENSMUSG00000022523	Cortex	10.1407	Cortex	0.774806	Development	0.774806	-0.610789	Up	Down	UpDown
ENSMUSG00000022523	Cortex	10.1407	Cortex	-0.610789	Ageing	0.774806	-0.610789	Up	Down	UpDown
ENSMUSG00000035790	Cortex	4.70838	Cortex	0.792825	Development	0.792825	0.0359288	Up	Up	UpUp
ENSMUSG00000035790	Cortex	4.70838	Cortex	0.0359288	Ageing	0.792825	0.0359288	Up	Up	UpUp
ENSMUSG00000022840	Cortex	6.64784	Cortex	0.991031	Development	0.991031	0.610789	Up	Up	UpUp
ENSMUSG00000022840	Cortex	6.64784	Cortex	0.610789	Ageing	0.991031	0.610789	Up	Up	UpUp
ENSMUSG00000052133	Cortex	4.51353	Cortex	-0.0540562	Development	-0.0540562	-0.323359	Down	Down	DownDown
ENSMUSG00000052133	Cortex	4.51353	Cortex	-0.323359	Ageing	-0.0540562	-0.323359	Down	Down	DownDown
ENSMUSG00000022812	Cortex	5.56467	Cortex	-0.936975	Development	-0.936975	-0.706599	Down	Down	DownDown
ENSMUSG00000022812	Cortex	5.56467	Cortex	-0.706599	Ageing	-0.936975	-0.706599	Down	Down	DownDown
ENSMUSG00000061080	Cortex	13.4674	Cortex	0.738769	Development	0.738769	0.215573	Up	Up	UpUp
ENSMUSG00000061080	Cortex	13.4674	Cortex	0.215573	Ageing	0.738769	0.215573	Up	Up	UpUp
ENSMUSG00000022696	Cortex	5.81386	Cortex	0.666694	Development	0.666694	0.0598813	Up	Up	UpUp
ENSMUSG00000022696	Cortex	5.81386	Cortex	0.0598813	Ageing	0.666694	0.0598813	Up	Up	UpUp
ENSMUSG00000047261	Cortex	4.4876	Cortex	-0.738769	Development	-0.738769	-0.562884	Down	Down	DownDown
ENSMUSG00000047261	Cortex	4.4876	Cortex	-0.562884	Ageing	-0.738769	-0.562884	Down	Down	DownDown
ENSMUSG00000022658	Cortex	11.3579	Cortex	0.881818	Development	0.881818	0.215573	Up	Up	UpUp
ENSMUSG00000022658	Cortex	11.3579	Cortex	0.215573	Ageing	0.881818	0.215573	Up	Up	UpUp
ENSMUSG00000064061	Cortex	6.95187	Cortex	-0.882919	Development	-0.882919	-0.479051	Down	Down	DownDown
ENSMUSG00000064061	Cortex	6.95187	Cortex	-0.479051	Ageing	-0.882919	-0.479051	Down	Down	DownDown
ENSMUSG00000064115	Cortex	15.0877	Cortex	0.2883	Development	0.2883	-0.80241	Up	Down	UpDown
ENSMUSG00000064115	Cortex	15.0877	Cortex	-0.80241	Ageing	0.2883	-0.80241	Up	Down	UpDown
ENSMUSG00000032940	Cortex	9.17928	Cortex	0.162169	Development	0.162169	0.0598813	Up	Up	UpUp
ENSMUSG00000032940	Cortex	9.17928	Cortex	0.0598813	Ageing	0.162169	0.0598813	Up	Up	UpUp
ENSMUSG00000022762	Cortex	9.97578	Cortex	-0.0180187	Development	-0.0180187	-0.610789	Down	Down	DownDown
ENSMUSG00000022762	Cortex	9.97578	Cortex	-0.610789	Ageing	-0.0180187	-0.610789	Down	Down	DownDown
ENSMUSG00000046160	Cortex	9.25911	Cortex	0.900937	Development	0.900937	0.778457	Up	Up	UpUp
ENSMUSG00000046160	Cortex	9.25911	Cortex	0.778457	Ageing	0.900937	0.778457	Up	Up	UpUp
ENSMUSG00000022973	Cortex	5.72064	Cortex	0.846881	Development	0.846881	-0.742528	Up	Down	UpDown
ENSMUSG00000022973	Cortex	5.72064	Cortex	-0.742528	Ageing	0.846881	-0.742528	Up	Down	UpDown
ENSMUSG00000090223	Cortex	6.79109	Cortex	0.991031	Development	0.991031	0.150602	Up	Up	UpUp
ENSMUSG00000090223	Cortex	6.79109	Cortex	0.150602	Ageing	0.991031	0.150602	Up	Up	UpUp
ENSMUSG00000050272	Cortex	42.9633	Cortex	0.0900937	Development	0.0900937	-0.850315	Up	Down	UpDown
ENSMUSG00000050272	Cortex	42.9633	Cortex	-0.850315	Ageing	0.0900937	-0.850315	Up	Down	UpDown
ENSMUSG00000023800	Cortex	4.70354	Cortex	-0.882919	Development	-0.882919	-0.467074	Down	Down	DownDown
ENSMUSG00000023800	Cortex	4.70354	Cortex	-0.467074	Ageing	-0.882919	-0.467074	Down	Down	DownDown
ENSMUSG00000038141	Cortex	4.83664	Cortex	-0.540562	Development	-0.540562	-0.143715	Down	Down	DownDown
ENSMUSG00000038141	Cortex	4.83664	Cortex	-0.143715	Ageing	-0.540562	-0.143715	Down	Down	DownDown
ENSMUSG00000040785	Cortex	5.16281	Cortex	-0.486506	Development	-0.486506	-0.455098	Down	Down	DownDown
ENSMUSG00000040785	Cortex	5.16281	Cortex	-0.455098	Ageing	-0.486506	-0.455098	Down	Down	DownDown
ENSMUSG00000023868	Cortex	6.60713	Cortex	-0.0900937	Development	-0.0900937	0.239525	Down	Up	DownUp
ENSMUSG00000023868	Cortex	6.60713	Cortex	0.239525	Ageing	-0.0900937	0.239525	Down	Up	DownUp
ENSMUSG00000047786	Cortex	7.87852	Cortex	0.738769	Development	0.738769	-0.850315	Up	Down	UpDown
ENSMUSG00000047786	Cortex	7.87852	Cortex	-0.850315	Ageing	0.738769	-0.850315	Up	Down	UpDown
ENSMUSG00000007021	Cortex	24.88	Cortex	0.594619	Development	0.594619	0.0598813	Up	Up	UpUp
ENSMUSG00000007021	Cortex	24.88	Cortex	0.0598813	Ageing	0.594619	0.0598813	Up	Up	UpUp
ENSMUSG00000033597	Cortex	30.7044	Cortex	-0.072075	Development	-0.072075	0.371264	Down	Up	DownUp
ENSMUSG00000033597	Cortex	30.7044	Cortex	0.371264	Ageing	-0.072075	0.371264	Down	Up	DownUp
ENSMUSG00000063239	Cortex	8.23382	Cortex	0.954994	Development	0.954994	-0.0958101	Up	Down	UpDown
ENSMUSG00000063239	Cortex	8.23382	Cortex	-0.0958101	Ageing	0.954994	-0.0958101	Up	Down	UpDown
ENSMUSG00000067629	Cortex	7.84919	Cortex	0.0900937	Development	0.0900937	-0.970077	Up	Down	UpDown
ENSMUSG00000067629	Cortex	7.84919	Cortex	-0.970077	Ageing	0.0900937	-0.970077	Up	Down	UpDown
ENSMUSG00000040276	Cortex	6.18691	Cortex	0.846881	Development	0.846881	-0.658694	Up	Down	UpDown
ENSMUSG00000040276	Cortex	6.18691	Cortex	-0.658694	Ageing	0.846881	-0.658694	Up	Down	UpDown
ENSMUSG00000025738	Cortex	7.85326	Cortex	0.954994	Development	0.954994	0.228916	Up	Up	UpUp
ENSMUSG00000025738	Cortex	7.85326	Cortex	0.228916	Ageing	0.954994	0.228916	Up	Up	UpUp
ENSMUSG00000025730	Cortex	5.39948	Cortex	-0.810844	Development	-0.810844	0.443122	Down	Up	DownUp
ENSMUSG00000025730	Cortex	5.39948	Cortex	0.443122	Ageing	-0.810844	0.443122	Down	Up	DownUp
ENSMUSG00000024220	Cortex	4.7393	Cortex	0.945455	Development	0.945455	-0.514979	Up	Down	UpDown
ENSMUSG00000024220	Cortex	4.7393	Cortex	-0.514979	Ageing	0.945455	-0.514979	Up	Down	UpDown
ENSMUSG00000048905	Cortex	5.86648	Cortex	0.522544	Development	0.522544	-0.80241	Up	Down	UpDown
ENSMUSG00000048905	Cortex	5.86648	Cortex	-0.80241	Ageing	0.522544	-0.80241	Up	Down	UpDown
ENSMUSG00000024008	Cortex	7.35369	Cortex	0.991031	Development	0.991031	0.359288	Up	Up	UpUp
ENSMUSG00000024008	Cortex	7.35369	Cortex	0.359288	Ageing	0.991031	0.359288	Up	Up	UpUp
ENSMUSG00000024163	Cortex	4.73285	Cortex	0.810844	Development	0.810844	-0.0361446	Up	Down	UpDown
ENSMUSG00000024163	Cortex	4.73285	Cortex	-0.0361446	Ageing	0.810844	-0.0361446	Up	Down	UpDown
ENSMUSG00000062202	Cortex	5.46814	Cortex	-0.774806	Development	-0.774806	-0.119763	Down	Down	DownDown
ENSMUSG00000062202	Cortex	5.46814	Cortex	-0.119763	Ageing	-0.774806	-0.119763	Down	Down	DownDown
ENSMUSG00000042203	Cortex	5.87211	Cortex	-0.702731	Development	-0.702731	0.0838338	Down	Up	DownUp
ENSMUSG00000042203	Cortex	5.87211	Cortex	0.0838338	Ageing	-0.702731	0.0838338	Down	Up	DownUp
ENSMUSG00000055202	Cortex	8.46452	Cortex	-0.882919	Development	-0.882919	-0.922172	Down	Down	DownDown
ENSMUSG00000055202	Cortex	8.46452	Cortex	-0.922172	Ageing	-0.882919	-0.922172	Down	Down	DownDown
ENSMUSG00000015476	Cortex	9.61392	Cortex	0.991031	Development	0.991031	-0.143715	Up	Down	UpDown
ENSMUSG00000015476	Cortex	9.61392	Cortex	-0.143715	Ageing	0.991031	-0.143715	Up	Down	UpDown
ENSMUSG00000024403	Cortex	6.69561	Cortex	0.882919	Development	0.882919	-0.163639	Up	Down	UpDown
ENSMUSG00000024403	Cortex	6.69561	Cortex	-0.163639	Ageing	0.882919	-0.163639	Up	Down	UpDown
ENSMUSG00000024462	Cortex	5.06359	Cortex	0.991031	Development	0.991031	0.120482	Up	Up	UpUp
ENSMUSG00000024462	Cortex	5.06359	Cortex	0.120482	Ageing	0.991031	0.120482	Up	Up	UpUp
ENSMUSG00000023912	Cortex	4.48106	Cortex	0.540562	Development	0.540562	0.203596	Up	Up	UpUp
ENSMUSG00000023912	Cortex	4.48106	Cortex	0.203596	Ageing	0.540562	0.203596	Up	Up	UpUp
ENSMUSG00000096847	Cortex	21.2436	Cortex	0.882919	Development	0.882919	0.407193	Up	Up	UpUp
ENSMUSG00000096847	Cortex	21.2436	Cortex	0.407193	Ageing	0.882919	0.407193	Up	Up	UpUp
ENSMUSG00000071073	Cortex	10.5438	Cortex	-0.414431	Development	-0.414431	0.958101	Down	Up	DownUp
ENSMUSG00000071073	Cortex	10.5438	Cortex	0.958101	Ageing	-0.414431	0.958101	Down	Up	DownUp
ENSMUSG00000047428	Cortex	5.93181	Cortex	-0.774806	Development	-0.774806	0.491027	Down	Up	DownUp
ENSMUSG00000047428	Cortex	5.93181	Cortex	0.491027	Ageing	-0.774806	0.491027	Down	Up	DownUp
ENSMUSG00000023944	Cortex	5.45355	Cortex	0.0366988	Development	0.0366988	-0.745468	Up	Down	UpDown
ENSMUSG00000023944	Cortex	5.45355	Cortex	-0.745468	Ageing	0.0366988	-0.745468	Up	Down	UpDown
ENSMUSG00000015599	Cortex	17.936	Cortex	0.882919	Development	0.882919	0.179644	Up	Up	UpUp
ENSMUSG00000015599	Cortex	17.936	Cortex	0.179644	Ageing	0.882919	0.179644	Up	Up	UpUp
ENSMUSG00000059409	Cortex	4.60938	Cortex	-0.0900937	Development	-0.0900937	0.323359	Down	Up	DownUp
ENSMUSG00000059409	Cortex	4.60938	Cortex	0.323359	Ageing	-0.0900937	0.323359	Down	Up	DownUp
ENSMUSG00000024172	Cortex	8.57824	Cortex	-0.991031	Development	-0.991031	-0.455098	Down	Down	DownDown
ENSMUSG00000024172	Cortex	8.57824	Cortex	-0.455098	Ageing	-0.991031	-0.455098	Down	Down	DownDown
ENSMUSG00000039154	Cortex	7.41449	Cortex	-0.900937	Development	-0.900937	0.251502	Down	Up	DownUp
ENSMUSG00000039154	Cortex	7.41449	Cortex	0.251502	Ageing	-0.900937	0.251502	Down	Up	DownUp
ENSMUSG00000001227	Cortex	5.81544	Cortex	0.702731	Development	0.702731	0.538932	Up	Up	UpUp
ENSMUSG00000001227	Cortex	5.81544	Cortex	0.538932	Ageing	0.702731	0.538932	Up	Up	UpUp
ENSMUSG00000062591	Cortex	8.07342	Cortex	0.745455	Development	0.745455	0.421687	Up	Up	UpUp
ENSMUSG00000062591	Cortex	8.07342	Cortex	0.421687	Ageing	0.745455	0.421687	Up	Up	UpUp
ENSMUSG00000095407	Cortex	15.1279	Cortex	-0.450469	Development	-0.450469	0.251502	Down	Up	DownUp
ENSMUSG00000095407	Cortex	15.1279	Cortex	0.251502	Ageing	-0.450469	0.251502	Down	Up	DownUp
ENSMUSG00000003279	Cortex	11.6064	Cortex	0.738769	Development	0.738769	-0.670671	Up	Down	UpDown
ENSMUSG00000003279	Cortex	11.6064	Cortex	-0.670671	Ageing	0.738769	-0.670671	Up	Down	UpDown
ENSMUSG00000024064	Cortex	17.4451	Cortex	0.774806	Development	0.774806	-0.670671	Up	Down	UpDown
ENSMUSG00000024064	Cortex	17.4451	Cortex	-0.670671	Ageing	0.774806	-0.670671	Up	Down	UpDown
ENSMUSG00000024077	Cortex	5.46988	Cortex	0.882919	Development	0.882919	0.0598813	Up	Up	UpUp
ENSMUSG00000024077	Cortex	5.46988	Cortex	0.0598813	Ageing	0.882919	0.0598813	Up	Up	UpUp
ENSMUSG00000071037	Cortex	4.908	Cortex	-0.360375	Development	-0.360375	0.263478	Down	Up	DownUp
ENSMUSG00000071037	Cortex	4.908	Cortex	0.263478	Ageing	-0.360375	0.263478	Down	Up	DownUp
ENSMUSG00000024127	Cortex	4.77646	Cortex	0.738769	Development	0.738769	-0.0718576	Up	Down	UpDown
ENSMUSG00000024127	Cortex	4.77646	Cortex	-0.0718576	Ageing	0.738769	-0.0718576	Up	Down	UpDown
ENSMUSG00000045038	Cortex	8.4822	Cortex	-0.0180187	Development	-0.0180187	-0.790433	Down	Down	DownDown
ENSMUSG00000045038	Cortex	8.4822	Cortex	-0.790433	Ageing	-0.0180187	-0.790433	Down	Down	DownDown
ENSMUSG00000036438	Cortex	5.85835	Cortex	0.522544	Development	0.522544	-0.74007	Up	Down	UpDown
ENSMUSG00000036438	Cortex	5.85835	Cortex	-0.74007	Ageing	0.522544	-0.74007	Up	Down	UpDown
ENSMUSG00000056124	Cortex	7.86016	Cortex	0.378394	Development	0.378394	-0.0359288	Up	Down	UpDown
ENSMUSG00000056124	Cortex	7.86016	Cortex	-0.0359288	Ageing	0.378394	-0.0359288	Up	Down	UpDown
ENSMUSG00000024109	Cortex	11.0591	Cortex	-0.5766	Development	-0.5766	-0.694623	Down	Down	DownDown
ENSMUSG00000024109	Cortex	11.0591	Cortex	-0.694623	Ageing	-0.5766	-0.694623	Down	Down	DownDown
ENSMUSG00000041923	Cortex	24.7467	Cortex	-0.414431	Development	-0.414431	-0.874267	Down	Down	DownDown
ENSMUSG00000041923	Cortex	24.7467	Cortex	-0.874267	Ageing	-0.414431	-0.874267	Down	Down	DownDown
ENSMUSG00000024269	Cortex	5.22346	Cortex	-0.881818	Development	-0.881818	0.179644	Down	Up	DownUp
ENSMUSG00000024269	Cortex	5.22346	Cortex	0.179644	Ageing	-0.881818	0.179644	Down	Up	DownUp
ENSMUSG00000024268	Cortex	41.7999	Cortex	0.252262	Development	0.252262	-0.574861	Up	Down	UpDown
ENSMUSG00000024268	Cortex	41.7999	Cortex	-0.574861	Ageing	0.252262	-0.574861	Up	Down	UpDown
ENSMUSG00000024261	Cortex	14.3322	Cortex	-0.900937	Development	-0.900937	-0.0838338	Down	Down	DownDown
ENSMUSG00000024261	Cortex	14.3322	Cortex	-0.0838338	Ageing	-0.900937	-0.0838338	Down	Down	DownDown
ENSMUSG00000052229	Cortex	7.65795	Cortex	0.630656	Development	0.630656	-0.838338	Up	Down	UpDown
ENSMUSG00000052229	Cortex	7.65795	Cortex	-0.838338	Ageing	0.630656	-0.838338	Up	Down	UpDown
ENSMUSG00000038128	Cortex	9.38264	Cortex	0.378394	Development	0.378394	0.0479051	Up	Up	UpUp
ENSMUSG00000038128	Cortex	9.38264	Cortex	0.0479051	Ageing	0.378394	0.0479051	Up	Up	UpUp
ENSMUSG00000005871	Cortex	5.02966	Cortex	-0.450469	Development	-0.450469	-0.814386	Down	Down	DownDown
ENSMUSG00000005871	Cortex	5.02966	Cortex	-0.814386	Ageing	-0.450469	-0.814386	Down	Down	DownDown
ENSMUSG00000038555	Cortex	10.6985	Cortex	0.630656	Development	0.630656	0.143715	Up	Up	UpUp
ENSMUSG00000038555	Cortex	10.6985	Cortex	0.143715	Ageing	0.630656	0.143715	Up	Up	UpUp
ENSMUSG00000024347	Cortex	10.6149	Cortex	-0.846881	Development	-0.846881	-0.574861	Down	Down	DownDown
ENSMUSG00000024347	Cortex	10.6149	Cortex	-0.574861	Ageing	-0.846881	-0.574861	Down	Down	DownDown
ENSMUSG00000060450	Cortex	5.55148	Cortex	0.306319	Development	0.306319	0.0359288	Up	Up	UpUp
ENSMUSG00000060450	Cortex	5.55148	Cortex	0.0359288	Ageing	0.306319	0.0359288	Up	Up	UpUp
ENSMUSG00000044024	Cortex	14.3041	Cortex	0.882919	Development	0.882919	0.874267	Up	Up	UpUp
ENSMUSG00000044024	Cortex	14.3041	Cortex	0.874267	Ageing	0.882919	0.874267	Up	Up	UpUp
ENSMUSG00000024425	Cortex	4.56241	Cortex	0.522544	Development	0.522544	0.0359288	Up	Up	UpUp
ENSMUSG00000024425	Cortex	4.56241	Cortex	0.0359288	Ageing	0.522544	0.0359288	Up	Up	UpUp
ENSMUSG00000024500	Cortex	16.962	Cortex	-0.936975	Development	-0.936975	-0.467074	Down	Down	DownDown
ENSMUSG00000024500	Cortex	16.962	Cortex	-0.467074	Ageing	-0.936975	-0.467074	Down	Down	DownDown
ENSMUSG00000052026	Cortex	7.47586	Cortex	0.630656	Development	0.630656	0.0239525	Up	Up	UpUp
ENSMUSG00000052026	Cortex	7.47586	Cortex	0.0239525	Ageing	0.630656	0.0239525	Up	Up	UpUp
ENSMUSG00000024581	Cortex	4.74305	Cortex	0.774806	Development	0.774806	-0.694623	Up	Down	UpDown
ENSMUSG00000024581	Cortex	4.74305	Cortex	-0.694623	Ageing	0.774806	-0.694623	Up	Down	UpDown
ENSMUSG00000040560	Cortex	4.8434	Cortex	0.522544	Development	0.522544	-0.694623	Up	Down	UpDown
ENSMUSG00000040560	Cortex	4.8434	Cortex	-0.694623	Ageing	0.522544	-0.694623	Up	Down	UpDown
ENSMUSG00000056812	Cortex	8.27998	Cortex	0.0900937	Development	0.0900937	0.323359	Up	Up	UpUp
ENSMUSG00000056812	Cortex	8.27998	Cortex	0.323359	Ageing	0.0900937	0.323359	Up	Up	UpUp
ENSMUSG00000024530	Cortex	18.9579	Cortex	-0.396412	Development	-0.396412	-0.0359288	Down	Down	DownDown
ENSMUSG00000024530	Cortex	18.9579	Cortex	-0.0359288	Ageing	-0.396412	-0.0359288	Down	Down	DownDown
ENSMUSG00000024524	Cortex	11.8153	Cortex	-0.43245	Development	-0.43245	0.395217	Down	Up	DownUp
ENSMUSG00000024524	Cortex	11.8153	Cortex	0.395217	Ageing	-0.43245	0.395217	Down	Up	DownUp
ENSMUSG00000024558	Cortex	8.76537	Cortex	0.991031	Development	0.991031	-0.275454	Up	Down	UpDown
ENSMUSG00000024558	Cortex	8.76537	Cortex	-0.275454	Ageing	0.991031	-0.275454	Up	Down	UpDown
ENSMUSG00000025427	Cortex	11.3344	Cortex	-0.72075	Development	-0.72075	-0.38324	Down	Down	DownDown
ENSMUSG00000025427	Cortex	11.3344	Cortex	-0.38324	Ageing	-0.72075	-0.38324	Down	Down	DownDown
ENSMUSG00000050321	Cortex	24.4377	Cortex	0.630656	Development	0.630656	-0.855422	Up	Down	UpDown
ENSMUSG00000050321	Cortex	24.4377	Cortex	-0.855422	Ageing	0.630656	-0.855422	Up	Down	UpDown
ENSMUSG00000005986	Cortex	8.67522	Cortex	0.342356	Development	0.342356	-0.143715	Up	Down	UpDown
ENSMUSG00000005986	Cortex	8.67522	Cortex	-0.143715	Ageing	0.342356	-0.143715	Up	Down	UpDown
ENSMUSG00000071691	Cortex	4.45124	Cortex	-0.666694	Development	-0.666694	0.742528	Down	Up	DownUp
ENSMUSG00000071691	Cortex	4.45124	Cortex	0.742528	Ageing	-0.666694	0.742528	Down	Up	DownUp
ENSMUSG00000006464	Cortex	7.2828	Cortex	0.738769	Development	0.738769	-0.682647	Up	Down	UpDown
ENSMUSG00000006464	Cortex	7.2828	Cortex	-0.682647	Ageing	0.738769	-0.682647	Up	Down	UpDown
ENSMUSG00000045903	Cortex	8.17757	Cortex	0.72075	Development	0.72075	-0.227549	Up	Down	UpDown
ENSMUSG00000045903	Cortex	8.17757	Cortex	-0.227549	Ageing	0.72075	-0.227549	Up	Down	UpDown
ENSMUSG00000061451	Cortex	5.98871	Cortex	0.738769	Development	0.738769	0.562884	Up	Up	UpUp
ENSMUSG00000061451	Cortex	5.98871	Cortex	0.562884	Ageing	0.738769	0.562884	Up	Up	UpUp
ENSMUSG00000024873	Cortex	13.8734	Cortex	-0.854545	Development	-0.854545	0.38324	Down	Up	DownUp
ENSMUSG00000024873	Cortex	13.8734	Cortex	0.38324	Ageing	-0.854545	0.38324	Down	Up	DownUp
ENSMUSG00000067889	Cortex	4.43468	Cortex	0.666694	Development	0.666694	0.0240964	Up	Up	UpUp
ENSMUSG00000067889	Cortex	4.43468	Cortex	0.0240964	Ageing	0.666694	0.0240964	Up	Up	UpUp
ENSMUSG00000047658	Cortex	19.5421	Cortex	0.126131	Development	0.126131	-0.179644	Up	Down	UpDown
ENSMUSG00000047658	Cortex	19.5421	Cortex	-0.179644	Ageing	0.126131	-0.179644	Up	Down	UpDown
ENSMUSG00000056185	Cortex	5.07954	Cortex	0.991031	Development	0.991031	0.862291	Up	Up	UpUp
ENSMUSG00000056185	Cortex	5.07954	Cortex	0.862291	Ageing	0.991031	0.862291	Up	Up	UpUp
ENSMUSG00000047787	Cortex	9.22288	Cortex	0.774806	Development	0.774806	0.275454	Up	Up	UpUp
ENSMUSG00000047787	Cortex	9.22288	Cortex	0.275454	Ageing	0.774806	0.275454	Up	Up	UpUp
ENSMUSG00000033768	Cortex	10.5556	Cortex	-0.414431	Development	-0.414431	-0.395217	Down	Down	DownDown
ENSMUSG00000033768	Cortex	10.5556	Cortex	-0.395217	Ageing	-0.414431	-0.395217	Down	Down	DownDown
ENSMUSG00000032773	Cortex	8.24515	Cortex	0.846881	Development	0.846881	0.526956	Up	Up	UpUp
ENSMUSG00000032773	Cortex	8.24515	Cortex	0.526956	Ageing	0.846881	0.526956	Up	Up	UpUp
ENSMUSG00000024758	Cortex	7.23969	Cortex	0.666694	Development	0.666694	-0.107786	Up	Down	UpDown
ENSMUSG00000024758	Cortex	7.23969	Cortex	-0.107786	Ageing	0.666694	-0.107786	Up	Down	UpDown
ENSMUSG00000071649	Cortex	4.53117	Cortex	0.954994	Development	0.954994	0.634742	Up	Up	UpUp
ENSMUSG00000071649	Cortex	4.53117	Cortex	0.634742	Ageing	0.954994	0.634742	Up	Up	UpUp
ENSMUSG00000071658	Cortex	24.3402	Cortex	-0.666694	Development	-0.666694	-0.0718576	Down	Down	DownDown
ENSMUSG00000071658	Cortex	24.3402	Cortex	-0.0718576	Ageing	-0.666694	-0.0718576	Down	Down	DownDown
ENSMUSG00000035735	Cortex	6.39974	Cortex	0.684712	Development	0.684712	0.203596	Up	Up	UpUp
ENSMUSG00000035735	Cortex	6.39974	Cortex	0.203596	Ageing	0.684712	0.203596	Up	Up	UpUp
ENSMUSG00000024743	Cortex	12.52	Cortex	0.738769	Development	0.738769	-0.431145	Up	Down	UpDown
ENSMUSG00000024743	Cortex	12.52	Cortex	-0.431145	Ageing	0.738769	-0.431145	Up	Down	UpDown
ENSMUSG00000036192	Cortex	10.3419	Cortex	-0.630656	Development	-0.630656	0.0119763	Down	Up	DownUp
ENSMUSG00000036192	Cortex	10.3419	Cortex	0.0119763	Ageing	-0.630656	0.0119763	Down	Up	DownUp
ENSMUSG00000052387	Cortex	8.01137	Cortex	-0.738769	Development	-0.738769	-0.359288	Down	Down	DownDown
ENSMUSG00000052387	Cortex	8.01137	Cortex	-0.359288	Ageing	-0.738769	-0.359288	Down	Down	DownDown
ENSMUSG00000024897	Cortex	13.3944	Cortex	-0.540562	Development	-0.540562	0.0359288	Down	Up	DownUp
ENSMUSG00000024897	Cortex	13.3944	Cortex	0.0359288	Ageing	-0.540562	0.0359288	Down	Up	DownUp
ENSMUSG00000040929	Cortex	7.28623	Cortex	-0.846881	Development	-0.846881	-0.826362	Down	Down	DownDown
ENSMUSG00000040929	Cortex	7.28623	Cortex	-0.826362	Ageing	-0.846881	-0.826362	Down	Down	DownDown
ENSMUSG00000024935	Cortex	5.29639	Cortex	0.882919	Development	0.882919	-0.682647	Up	Down	UpDown
ENSMUSG00000024935	Cortex	5.29639	Cortex	-0.682647	Ageing	0.882919	-0.682647	Up	Down	UpDown
ENSMUSG00000024798	Cortex	6.63833	Cortex	0.216225	Development	0.216225	-0.323359	Up	Down	UpDown
ENSMUSG00000024798	Cortex	6.63833	Cortex	-0.323359	Ageing	0.216225	-0.323359	Up	Down	UpDown
ENSMUSG00000067242	Cortex	6.89776	Cortex	0.882919	Development	0.882919	0.203596	Up	Up	UpUp
ENSMUSG00000067242	Cortex	6.89776	Cortex	0.203596	Ageing	0.882919	0.203596	Up	Up	UpUp
ENSMUSG00000025020	Cortex	11.8383	Cortex	0.5766	Development	0.5766	-0.682647	Up	Down	UpDown
ENSMUSG00000025020	Cortex	11.8383	Cortex	-0.682647	Ageing	0.5766	-0.682647	Up	Down	UpDown
ENSMUSG00000049670	Cortex	8.38113	Cortex	-0.702731	Development	-0.702731	-0.155691	Down	Down	DownDown
ENSMUSG00000049670	Cortex	8.38113	Cortex	-0.155691	Ageing	-0.702731	-0.155691	Down	Down	DownDown
ENSMUSG00000042401	Cortex	7.71011	Cortex	0.882919	Development	0.882919	-0.179644	Up	Down	UpDown
ENSMUSG00000042401	Cortex	7.71011	Cortex	-0.179644	Ageing	0.882919	-0.179644	Up	Down	UpDown
ENSMUSG00000042532	Cortex	4.40924	Cortex	0.666694	Development	0.666694	0.0119763	Up	Up	UpUp
ENSMUSG00000042532	Cortex	4.40924	Cortex	0.0119763	Ageing	0.666694	0.0119763	Up	Up	UpUp
ENSMUSG00000025189	Cortex	5.2561	Cortex	0.828862	Development	0.828862	0.119763	Up	Up	UpUp
ENSMUSG00000025189	Cortex	5.2561	Cortex	0.119763	Ageing	0.828862	0.119763	Up	Up	UpUp
ENSMUSG00000103442	Cortex	5.11825	Cortex	-0.684712	Development	-0.684712	0.646718	Down	Up	DownUp
ENSMUSG00000103442	Cortex	5.11825	Cortex	0.646718	Ageing	-0.684712	0.646718	Down	Up	DownUp
ENSMUSG00000104148	Cortex	5.96943	Cortex	-0.900937	Development	-0.900937	-0.311383	Down	Down	DownDown
ENSMUSG00000104148	Cortex	5.96943	Cortex	-0.311383	Ageing	-0.900937	-0.311383	Down	Down	DownDown
ENSMUSG00000102312	Cortex	5.79381	Cortex	-0.792825	Development	-0.792825	-0.311383	Down	Down	DownDown
ENSMUSG00000102312	Cortex	5.79381	Cortex	-0.311383	Ageing	-0.792825	-0.311383	Down	Down	DownDown
ENSMUSG00000104252	Cortex	9.08291	Cortex	-0.72075	Development	-0.72075	0.275454	Down	Up	DownUp
ENSMUSG00000104252	Cortex	9.08291	Cortex	0.275454	Ageing	-0.72075	0.275454	Down	Up	DownUp
ENSMUSG00000103092	Cortex	7.4942	Cortex	-0.756787	Development	-0.756787	-0.203596	Down	Down	DownDown
ENSMUSG00000103092	Cortex	7.4942	Cortex	-0.203596	Ageing	-0.756787	-0.203596	Down	Down	DownDown
ENSMUSG00000103707	Cortex	7.88308	Cortex	-0.882919	Development	-0.882919	-0.503003	Down	Down	DownDown
ENSMUSG00000103707	Cortex	7.88308	Cortex	-0.503003	Ageing	-0.882919	-0.503003	Down	Down	DownDown
ENSMUSG00000104318	Cortex	6.14126	Cortex	-0.918956	Development	-0.918956	-0.670671	Down	Down	DownDown
ENSMUSG00000104318	Cortex	6.14126	Cortex	-0.670671	Ageing	-0.918956	-0.670671	Down	Down	DownDown
ENSMUSG00000103770	Cortex	6.83939	Cortex	-0.846881	Development	-0.846881	-0.634742	Down	Down	DownDown
ENSMUSG00000103770	Cortex	6.83939	Cortex	-0.634742	Ageing	-0.846881	-0.634742	Down	Down	DownDown
ENSMUSG00000007440	Cortex	5.59608	Cortex	-0.648675	Development	-0.648675	0.155691	Down	Up	DownUp
ENSMUSG00000007440	Cortex	5.59608	Cortex	0.155691	Ageing	-0.648675	0.155691	Down	Up	DownUp
ENSMUSG00000102206	Cortex	5.82958	Cortex	-0.810844	Development	-0.810844	0.0598813	Down	Up	DownUp
ENSMUSG00000102206	Cortex	5.82958	Cortex	0.0598813	Ageing	-0.810844	0.0598813	Down	Up	DownUp
ENSMUSG00000103310	Cortex	11.0932	Cortex	-0.666694	Development	-0.666694	-0.395217	Down	Down	DownDown
ENSMUSG00000103310	Cortex	11.0932	Cortex	-0.395217	Ageing	-0.666694	-0.395217	Down	Down	DownDown
ENSMUSG00000103255	Cortex	7.97761	Cortex	0.612637	Development	0.612637	-0.335335	Up	Down	UpDown
ENSMUSG00000103255	Cortex	7.97761	Cortex	-0.335335	Ageing	0.612637	-0.335335	Up	Down	UpDown
ENSMUSG00000102697	Cortex	6.08946	Cortex	-0.342356	Development	-0.342356	-0.0598813	Down	Down	DownDown
ENSMUSG00000102697	Cortex	6.08946	Cortex	-0.0598813	Ageing	-0.342356	-0.0598813	Down	Down	DownDown
ENSMUSG00000103144	Cortex	5.30694	Cortex	-0.936975	Development	-0.936975	-0.179644	Down	Down	DownDown
ENSMUSG00000103144	Cortex	5.30694	Cortex	-0.179644	Ageing	-0.936975	-0.179644	Down	Down	DownDown
ENSMUSG00000103332	Cortex	5.21673	Cortex	-0.882919	Development	-0.882919	0.89822	Down	Up	DownUp
ENSMUSG00000103332	Cortex	5.21673	Cortex	0.89822	Ageing	-0.882919	0.89822	Down	Up	DownUp
ENSMUSG00000104346	Cortex	7.27524	Cortex	-0.846881	Development	-0.846881	0.275454	Down	Up	DownUp
ENSMUSG00000104346	Cortex	7.27524	Cortex	0.275454	Ageing	-0.846881	0.275454	Down	Up	DownUp
ENSMUSG00000103037	Cortex	8.00108	Cortex	-0.630656	Development	-0.630656	0.0119763	Down	Up	DownUp
ENSMUSG00000103037	Cortex	8.00108	Cortex	0.0119763	Ageing	-0.630656	0.0119763	Down	Up	DownUp
ENSMUSG00000103677	Cortex	4.59171	Cortex	-0.774806	Development	-0.774806	0.694623	Down	Up	DownUp
ENSMUSG00000103677	Cortex	4.59171	Cortex	0.694623	Ageing	-0.774806	0.694623	Down	Up	DownUp
ENSMUSG00000103567	Cortex	7.19545	Cortex	-0.378394	Development	-0.378394	0.754505	Down	Up	DownUp
ENSMUSG00000103567	Cortex	7.19545	Cortex	0.754505	Ageing	-0.378394	0.754505	Down	Up	DownUp
ENSMUSG00000103793	Cortex	6.57387	Cortex	-0.558581	Development	-0.558581	0.658694	Down	Up	DownUp
ENSMUSG00000103793	Cortex	6.57387	Cortex	0.658694	Ageing	-0.558581	0.658694	Down	Up	DownUp
ENSMUSG00000103472	Cortex	6.82579	Cortex	-0.738769	Development	-0.738769	0.778457	Down	Up	DownUp
ENSMUSG00000103472	Cortex	6.82579	Cortex	0.778457	Ageing	-0.738769	0.778457	Down	Up	DownUp
ENSMUSG00000103897	Cortex	8.82126	Cortex	-0.810844	Development	-0.810844	0.754505	Down	Up	DownUp
ENSMUSG00000103897	Cortex	8.82126	Cortex	0.754505	Ageing	-0.810844	0.754505	Down	Up	DownUp
ENSMUSG00000102440	Cortex	9.21175	Cortex	0.198206	Development	0.198206	0.826362	Up	Up	UpUp
ENSMUSG00000102440	Cortex	9.21175	Cortex	0.826362	Ageing	0.198206	0.826362	Up	Up	UpUp
ENSMUSG00000102742	Cortex	7.60854	Cortex	-0.738769	Development	-0.738769	-0.574861	Down	Down	DownDown
ENSMUSG00000102742	Cortex	7.60854	Cortex	-0.574861	Ageing	-0.738769	-0.574861	Down	Down	DownDown
ENSMUSG00000102428	Cortex	7.51297	Cortex	-0.900937	Development	-0.900937	-0.598813	Down	Down	DownDown
ENSMUSG00000102428	Cortex	7.51297	Cortex	-0.598813	Ageing	-0.900937	-0.598813	Down	Down	DownDown
ENSMUSG00000045498	Cortex	4.4099	Cortex	-0.594619	Development	-0.594619	0.778457	Down	Up	DownUp
ENSMUSG00000045498	Cortex	4.4099	Cortex	0.778457	Ageing	-0.594619	0.778457	Down	Up	DownUp
ENSMUSG00000045062	Cortex	4.87231	Cortex	-0.900937	Development	-0.900937	0.562884	Down	Up	DownUp
ENSMUSG00000045062	Cortex	4.87231	Cortex	0.562884	Ageing	-0.900937	0.562884	Down	Up	DownUp
ENSMUSG00000043458	Cortex	6.18884	Cortex	0.180187	Development	0.180187	0.143715	Up	Up	UpUp
ENSMUSG00000043458	Cortex	6.18884	Cortex	0.143715	Ageing	0.180187	0.143715	Up	Up	UpUp
ENSMUSG00000047307	Cortex	6.72776	Cortex	0.486506	Development	0.486506	0.706599	Up	Up	UpUp
ENSMUSG00000047307	Cortex	6.72776	Cortex	0.706599	Ageing	0.486506	0.706599	Up	Up	UpUp
ENSMUSG00000044043	Cortex	4.599	Cortex	0.648675	Development	0.648675	0.970077	Up	Up	UpUp
ENSMUSG00000044043	Cortex	4.599	Cortex	0.970077	Ageing	0.648675	0.970077	Up	Up	UpUp
ENSMUSG00000048347	Cortex	5.21715	Cortex	-0.306319	Development	-0.306319	-0.239525	Down	Down	DownDown
ENSMUSG00000048347	Cortex	5.21715	Cortex	-0.239525	Ageing	-0.306319	-0.239525	Down	Down	DownDown
ENSMUSG00000043313	Cortex	4.44979	Cortex	-0.936975	Development	-0.936975	-0.467074	Down	Down	DownDown
ENSMUSG00000043313	Cortex	4.44979	Cortex	-0.467074	Ageing	-0.936975	-0.467074	Down	Down	DownDown
ENSMUSG00000025221	Cortex	12.0862	Cortex	0.954994	Development	0.954994	-0.167668	Up	Down	UpDown
ENSMUSG00000025221	Cortex	12.0862	Cortex	-0.167668	Ageing	0.954994	-0.167668	Up	Down	UpDown
ENSMUSG00000037126	Cortex	27.2541	Cortex	-0.5766	Development	-0.5766	0.060241	Down	Up	DownUp
ENSMUSG00000037126	Cortex	27.2541	Cortex	0.060241	Ageing	-0.5766	0.060241	Down	Up	DownUp
ENSMUSG00000034336	Cortex	30.7839	Cortex	-0.702731	Development	-0.702731	-0.263478	Down	Down	DownDown
ENSMUSG00000034336	Cortex	30.7839	Cortex	-0.263478	Ageing	-0.702731	-0.263478	Down	Down	DownDown
ENSMUSG00000043531	Cortex	15.5889	Cortex	0.180187	Development	0.180187	0.227549	Up	Up	UpUp
ENSMUSG00000043531	Cortex	15.5889	Cortex	0.227549	Ageing	0.180187	0.227549	Up	Up	UpUp
ENSMUSG00000033717	Cortex	5.44619	Cortex	0.738769	Development	0.738769	0	Up	Down	UpDown
ENSMUSG00000033717	Cortex	5.44619	Cortex	0	Ageing	0.738769	0	Up	Down	UpDown
ENSMUSG00000025092	Cortex	7.85585	Cortex	0.126131	Development	0.126131	0.0359288	Up	Up	UpUp
ENSMUSG00000025092	Cortex	7.85585	Cortex	0.0359288	Ageing	0.126131	0.0359288	Up	Up	UpUp
ENSMUSG00000040022	Cortex	5.9302	Cortex	-0.882919	Development	-0.882919	-0.778457	Down	Down	DownDown
ENSMUSG00000040022	Cortex	5.9302	Cortex	-0.778457	Ageing	-0.882919	-0.778457	Down	Down	DownDown
ENSMUSG00000072437	Cortex	12.6173	Cortex	0.630656	Development	0.630656	0.694623	Up	Up	UpUp
ENSMUSG00000072437	Cortex	12.6173	Cortex	0.694623	Ageing	0.630656	0.694623	Up	Up	UpUp
ENSMUSG00000026643	Cortex	6.76437	Cortex	-0.486506	Development	-0.486506	-0.514979	Down	Down	DownDown
ENSMUSG00000026643	Cortex	6.76437	Cortex	-0.514979	Ageing	-0.486506	-0.514979	Down	Down	DownDown
ENSMUSG00000049630	Cortex	6.56456	Cortex	0.774806	Development	0.774806	-0.754505	Up	Down	UpDown
ENSMUSG00000049630	Cortex	6.56456	Cortex	-0.754505	Ageing	0.774806	-0.754505	Up	Down	UpDown
ENSMUSG00000026787	Cortex	6.94805	Cortex	0.991031	Development	0.991031	-0.19162	Up	Down	UpDown
ENSMUSG00000026787	Cortex	6.94805	Cortex	-0.19162	Ageing	0.991031	-0.19162	Up	Down	UpDown
ENSMUSG00000002107	Cortex	4.46203	Cortex	-0.954994	Development	-0.954994	-0.742528	Down	Down	DownDown
ENSMUSG00000002107	Cortex	4.46203	Cortex	-0.742528	Ageing	-0.954994	-0.742528	Down	Down	DownDown
ENSMUSG00000036591	Cortex	5.41215	Cortex	-0.666694	Development	-0.666694	-0.0598813	Down	Down	DownDown
ENSMUSG00000036591	Cortex	5.41215	Cortex	-0.0598813	Ageing	-0.666694	-0.0598813	Down	Down	DownDown
ENSMUSG00000004113	Cortex	13.3469	Cortex	-0.594619	Development	-0.594619	-0.28743	Down	Down	DownDown
ENSMUSG00000004113	Cortex	13.3469	Cortex	-0.28743	Ageing	-0.594619	-0.28743	Down	Down	DownDown
ENSMUSG00000044628	Cortex	6.25112	Cortex	0.666694	Development	0.666694	0.610789	Up	Up	UpUp
ENSMUSG00000044628	Cortex	6.25112	Cortex	0.610789	Ageing	0.666694	0.610789	Up	Up	UpUp
ENSMUSG00000006476	Cortex	4.89753	Cortex	0.666694	Development	0.666694	-0.0838338	Up	Down	UpDown
ENSMUSG00000006476	Cortex	4.89753	Cortex	-0.0838338	Ageing	0.666694	-0.0838338	Up	Down	UpDown
ENSMUSG00000026959	Cortex	10.8636	Cortex	0.666694	Development	0.666694	-0.19162	Up	Down	UpDown
ENSMUSG00000026959	Cortex	10.8636	Cortex	-0.19162	Ageing	0.666694	-0.19162	Up	Down	UpDown
ENSMUSG00000026944	Cortex	5.32699	Cortex	0.954994	Development	0.954994	0.419169	Up	Up	UpUp
ENSMUSG00000026944	Cortex	5.32699	Cortex	0.419169	Ageing	0.954994	0.419169	Up	Up	UpUp
ENSMUSG00000015090	Cortex	6.80798	Cortex	0.828862	Development	0.828862	0.598813	Up	Up	UpUp
ENSMUSG00000015090	Cortex	6.80798	Cortex	0.598813	Ageing	0.828862	0.598813	Up	Up	UpUp
ENSMUSG00000029419	Cortex	12.6143	Cortex	0.666694	Development	0.666694	0.251502	Up	Up	UpUp
ENSMUSG00000029419	Cortex	12.6143	Cortex	0.251502	Ageing	0.666694	0.251502	Up	Up	UpUp
ENSMUSG00000058740	Cortex	9.18076	Cortex	0.954994	Development	0.954994	0.0838338	Up	Up	UpUp
ENSMUSG00000058740	Cortex	9.18076	Cortex	0.0838338	Ageing	0.954994	0.0838338	Up	Up	UpUp
ENSMUSG00000026933	Cortex	6.18059	Cortex	-0.991031	Development	-0.991031	-0.455098	Down	Down	DownDown
ENSMUSG00000026933	Cortex	6.18059	Cortex	-0.455098	Ageing	-0.991031	-0.455098	Down	Down	DownDown
ENSMUSG00000036067	Cortex	4.94413	Cortex	0.486506	Development	0.486506	0.263478	Up	Up	UpUp
ENSMUSG00000036067	Cortex	4.94413	Cortex	0.263478	Ageing	0.486506	0.263478	Up	Up	UpUp
ENSMUSG00000009216	Cortex	10.6342	Cortex	0.666694	Development	0.666694	-0.0361446	Up	Down	UpDown
ENSMUSG00000009216	Cortex	10.6342	Cortex	-0.0361446	Ageing	0.666694	-0.0361446	Up	Down	UpDown
ENSMUSG00000109946	Cortex	7.41121	Cortex	0.216225	Development	0.216225	0.203596	Up	Up	UpUp
ENSMUSG00000109946	Cortex	7.41121	Cortex	0.203596	Ageing	0.216225	0.203596	Up	Up	UpUp
ENSMUSG00000026833	Cortex	6.9077	Cortex	0.846881	Development	0.846881	-0.335335	Up	Down	UpDown
ENSMUSG00000026833	Cortex	6.9077	Cortex	-0.335335	Ageing	0.846881	-0.335335	Up	Down	UpDown
ENSMUSG00000039686	Cortex	4.55449	Cortex	0.991031	Development	0.991031	-0.138554	Up	Down	UpDown
ENSMUSG00000039686	Cortex	4.55449	Cortex	-0.138554	Ageing	0.991031	-0.138554	Up	Down	UpDown
ENSMUSG00000038860	Cortex	7.08472	Cortex	-0.252262	Development	-0.252262	-0.179644	Down	Down	DownDown
ENSMUSG00000038860	Cortex	7.08472	Cortex	-0.179644	Ageing	-0.252262	-0.179644	Down	Down	DownDown
ENSMUSG00000026797	Cortex	7.63062	Cortex	0.666694	Development	0.666694	-0.598813	Up	Down	UpDown
ENSMUSG00000026797	Cortex	7.63062	Cortex	-0.598813	Ageing	0.666694	-0.598813	Up	Down	UpDown
ENSMUSG00000038831	Cortex	7.35624	Cortex	-0.991031	Development	-0.991031	-0.203596	Down	Down	DownDown
ENSMUSG00000038831	Cortex	7.35624	Cortex	-0.203596	Ageing	-0.991031	-0.203596	Down	Down	DownDown
ENSMUSG00000035236	Cortex	5.04244	Cortex	-0.991031	Development	-0.991031	-0.479051	Down	Down	DownDown
ENSMUSG00000035236	Cortex	5.04244	Cortex	-0.479051	Ageing	-0.991031	-0.479051	Down	Down	DownDown
ENSMUSG00000036792	Cortex	5.67085	Cortex	0.954994	Development	0.954994	-0.431145	Up	Down	UpDown
ENSMUSG00000036792	Cortex	5.67085	Cortex	-0.431145	Ageing	0.954994	-0.431145	Up	Down	UpDown
ENSMUSG00000050447	Cortex	5.15269	Cortex	-0.666694	Development	-0.666694	-0.0359288	Down	Down	DownDown
ENSMUSG00000050447	Cortex	5.15269	Cortex	-0.0359288	Ageing	-0.666694	-0.0359288	Down	Down	DownDown
ENSMUSG00000026764	Cortex	28.4715	Cortex	-0.306319	Development	-0.306319	-0.347312	Down	Down	DownDown
ENSMUSG00000026764	Cortex	28.4715	Cortex	-0.347312	Ageing	-0.306319	-0.347312	Down	Down	DownDown
ENSMUSG00000017412	Cortex	6.19244	Cortex	0.666694	Development	0.666694	-0.566265	Up	Down	UpDown
ENSMUSG00000017412	Cortex	6.19244	Cortex	-0.566265	Ageing	0.666694	-0.566265	Up	Down	UpDown
ENSMUSG00000075334	Cortex	5.33096	Cortex	-0.991031	Development	-0.991031	-0.179644	Down	Down	DownDown
ENSMUSG00000075334	Cortex	5.33096	Cortex	-0.179644	Ageing	-0.991031	-0.179644	Down	Down	DownDown
ENSMUSG00000026824	Cortex	7.90958	Cortex	0.738769	Development	0.738769	-0.443122	Up	Down	UpDown
ENSMUSG00000026824	Cortex	7.90958	Cortex	-0.443122	Ageing	0.738769	-0.443122	Up	Down	UpDown
ENSMUSG00000036641	Cortex	4.62415	Cortex	0.846881	Development	0.846881	-0.143715	Up	Down	UpDown
ENSMUSG00000036641	Cortex	4.62415	Cortex	-0.143715	Ageing	0.846881	-0.143715	Up	Down	UpDown
ENSMUSG00000035033	Cortex	18.3308	Cortex	-0.846881	Development	-0.846881	0.0119763	Down	Up	DownUp
ENSMUSG00000035033	Cortex	18.3308	Cortex	0.0119763	Ageing	-0.846881	0.0119763	Down	Up	DownUp
ENSMUSG00000026904	Cortex	10.5662	Cortex	0.828862	Development	0.828862	-0.574861	Up	Down	UpDown
ENSMUSG00000026904	Cortex	10.5662	Cortex	-0.574861	Ageing	0.828862	-0.574861	Up	Down	UpDown
ENSMUSG00000059742	Cortex	8.49907	Cortex	0.342356	Development	0.342356	-0.263478	Up	Down	UpDown
ENSMUSG00000059742	Cortex	8.49907	Cortex	-0.263478	Ageing	0.342356	-0.263478	Up	Down	UpDown
ENSMUSG00000057182	Cortex	5.40181	Cortex	-0.846881	Development	-0.846881	-0.359288	Down	Down	DownDown
ENSMUSG00000057182	Cortex	5.40181	Cortex	-0.359288	Ageing	-0.846881	-0.359288	Down	Down	DownDown
ENSMUSG00000075318	Cortex	21.2324	Cortex	0.486506	Development	0.486506	-0.694623	Up	Down	UpDown
ENSMUSG00000075318	Cortex	21.2324	Cortex	-0.694623	Ageing	0.486506	-0.694623	Up	Down	UpDown
ENSMUSG00000064329	Cortex	7.72215	Cortex	0.846881	Development	0.846881	0.347312	Up	Up	UpUp
ENSMUSG00000064329	Cortex	7.72215	Cortex	0.347312	Ageing	0.846881	0.347312	Up	Up	UpUp
ENSMUSG00000070880	Cortex	9.32835	Cortex	0.954994	Development	0.954994	-0.299407	Up	Down	UpDown
ENSMUSG00000070880	Cortex	9.32835	Cortex	-0.299407	Ageing	0.954994	-0.299407	Up	Down	UpDown
ENSMUSG00000041911	Cortex	10.138	Cortex	-0.900937	Development	-0.900937	-0.299407	Down	Down	DownDown
ENSMUSG00000041911	Cortex	10.138	Cortex	-0.299407	Ageing	-0.900937	-0.299407	Down	Down	DownDown
ENSMUSG00000068859	Cortex	4.47674	Cortex	-0.43245	Development	-0.43245	-0.0838338	Down	Down	DownDown
ENSMUSG00000068859	Cortex	4.47674	Cortex	-0.0838338	Ageing	-0.43245	-0.0838338	Down	Down	DownDown
ENSMUSG00000027104	Cortex	6.79399	Cortex	-0.360375	Development	-0.360375	-0.598813	Down	Down	DownDown
ENSMUSG00000027104	Cortex	6.79399	Cortex	-0.598813	Ageing	-0.360375	-0.598813	Down	Down	DownDown
ENSMUSG00000059173	Cortex	5.12818	Cortex	0.846881	Development	0.846881	-0.395217	Up	Down	UpDown
ENSMUSG00000059173	Cortex	5.12818	Cortex	-0.395217	Ageing	0.846881	-0.395217	Up	Down	UpDown
ENSMUSG00000048388	Cortex	11.0036	Cortex	0.522544	Development	0.522544	-0.514979	Up	Down	UpDown
ENSMUSG00000048388	Cortex	11.0036	Cortex	-0.514979	Ageing	0.522544	-0.514979	Up	Down	UpDown
ENSMUSG00000050896	Cortex	9.41512	Cortex	0.396412	Development	0.396412	0.0598813	Up	Up	UpUp
ENSMUSG00000050896	Cortex	9.41512	Cortex	0.0598813	Ageing	0.396412	0.0598813	Up	Up	UpUp
ENSMUSG00000075224	Cortex	9.28555	Cortex	-0.126131	Development	-0.126131	-0.514979	Down	Down	DownDown
ENSMUSG00000075224	Cortex	9.28555	Cortex	-0.514979	Ageing	-0.126131	-0.514979	Down	Down	DownDown
ENSMUSG00000040794	Cortex	5.62169	Cortex	0.738769	Development	0.738769	0.562884	Up	Up	UpUp
ENSMUSG00000040794	Cortex	5.62169	Cortex	0.562884	Ageing	0.738769	0.562884	Up	Up	UpUp
ENSMUSG00000027220	Cortex	6.35727	Cortex	0.846881	Development	0.846881	-0.0119763	Up	Down	UpDown
ENSMUSG00000027220	Cortex	6.35727	Cortex	-0.0119763	Ageing	0.846881	-0.0119763	Up	Down	UpDown
ENSMUSG00000027223	Cortex	6.33256	Cortex	0.738769	Development	0.738769	0.927711	Up	Up	UpUp
ENSMUSG00000027223	Cortex	6.33256	Cortex	0.927711	Ageing	0.738769	0.927711	Up	Up	UpUp
ENSMUSG00000050587	Cortex	14.8665	Cortex	0.648675	Development	0.648675	0.0958101	Up	Up	UpUp
ENSMUSG00000050587	Cortex	14.8665	Cortex	0.0958101	Ageing	0.648675	0.0958101	Up	Up	UpUp
ENSMUSG00000075012	Cortex	4.93835	Cortex	0.0900937	Development	0.0900937	0.107786	Up	Up	UpUp
ENSMUSG00000075012	Cortex	4.93835	Cortex	0.107786	Ageing	0.0900937	0.107786	Up	Up	UpUp
ENSMUSG00000068373	Cortex	11.4837	Cortex	-0.630656	Development	-0.630656	-0.443122	Down	Down	DownDown
ENSMUSG00000068373	Cortex	11.4837	Cortex	-0.443122	Ageing	-0.630656	-0.443122	Down	Down	DownDown
ENSMUSG00000016386	Cortex	6.87456	Cortex	-0.882919	Development	-0.882919	0.323359	Down	Up	DownUp
ENSMUSG00000016386	Cortex	6.87456	Cortex	0.323359	Ageing	-0.882919	0.323359	Down	Up	DownUp
ENSMUSG00000023236	Cortex	18.5207	Cortex	0.666694	Development	0.666694	0.138554	Up	Up	UpUp
ENSMUSG00000023236	Cortex	18.5207	Cortex	0.138554	Ageing	0.666694	0.138554	Up	Up	UpUp
ENSMUSG00000040133	Cortex	10.8626	Cortex	-0.414431	Development	-0.414431	0.395217	Down	Up	DownUp
ENSMUSG00000040133	Cortex	10.8626	Cortex	0.395217	Ageing	-0.414431	0.395217	Down	Up	DownUp
ENSMUSG00000074923	Cortex	8.61718	Cortex	-0.702731	Development	-0.702731	-0.419169	Down	Down	DownDown
ENSMUSG00000074923	Cortex	8.61718	Cortex	-0.419169	Ageing	-0.702731	-0.419169	Down	Down	DownDown
ENSMUSG00000040035	Cortex	8.56265	Cortex	0.882919	Development	0.882919	-0.682647	Up	Down	UpDown
ENSMUSG00000040035	Cortex	8.56265	Cortex	-0.682647	Ageing	0.882919	-0.682647	Up	Down	UpDown
ENSMUSG00000039983	Cortex	4.81928	Cortex	0.612637	Development	0.612637	0.0359288	Up	Up	UpUp
ENSMUSG00000039983	Cortex	4.81928	Cortex	0.0359288	Ageing	0.612637	0.0359288	Up	Up	UpUp
ENSMUSG00000027304	Cortex	5.60268	Cortex	-0.900937	Development	-0.900937	-0.826362	Down	Down	DownDown
ENSMUSG00000027304	Cortex	5.60268	Cortex	-0.826362	Ageing	-0.900937	-0.826362	Down	Down	DownDown
ENSMUSG00000027210	Cortex	6.01996	Cortex	-0.702731	Development	-0.702731	-0.359288	Down	Down	DownDown
ENSMUSG00000027210	Cortex	6.01996	Cortex	-0.359288	Ageing	-0.702731	-0.359288	Down	Down	DownDown
ENSMUSG00000090100	Cortex	5.69734	Cortex	-0.522544	Development	-0.522544	-0.634742	Down	Down	DownDown
ENSMUSG00000090100	Cortex	5.69734	Cortex	-0.634742	Ageing	-0.522544	-0.634742	Down	Down	DownDown
ENSMUSG00000027254	Cortex	6.48404	Cortex	0.882919	Development	0.882919	0.240964	Up	Up	UpUp
ENSMUSG00000027254	Cortex	6.48404	Cortex	0.240964	Ageing	0.882919	0.240964	Up	Up	UpUp
ENSMUSG00000027238	Cortex	9.44536	Cortex	-0.666694	Development	-0.666694	0.359288	Down	Up	DownUp
ENSMUSG00000027238	Cortex	9.44536	Cortex	0.359288	Ageing	-0.666694	0.359288	Down	Up	DownUp
ENSMUSG00000043909	Cortex	5.43469	Cortex	-0.900937	Development	-0.900937	-0.622766	Down	Down	DownDown
ENSMUSG00000043909	Cortex	5.43469	Cortex	-0.622766	Ageing	-0.900937	-0.622766	Down	Down	DownDown
ENSMUSG00000034850	Cortex	6.34035	Cortex	-0.702731	Development	-0.702731	-0.658694	Down	Down	DownDown
ENSMUSG00000034850	Cortex	6.34035	Cortex	-0.658694	Ageing	-0.702731	-0.658694	Down	Down	DownDown
ENSMUSG00000079056	Cortex	7.73888	Cortex	0.954994	Development	0.954994	0.395217	Up	Up	UpUp
ENSMUSG00000079056	Cortex	7.73888	Cortex	0.395217	Ageing	0.954994	0.395217	Up	Up	UpUp
ENSMUSG00000042851	Cortex	4.70437	Cortex	0.198206	Development	0.198206	-0.682647	Up	Down	UpDown
ENSMUSG00000042851	Cortex	4.70437	Cortex	-0.682647	Ageing	0.198206	-0.682647	Up	Down	UpDown
ENSMUSG00000027394	Cortex	4.83177	Cortex	-0.666694	Development	-0.666694	0.347312	Down	Up	DownUp
ENSMUSG00000027394	Cortex	4.83177	Cortex	0.347312	Ageing	-0.666694	0.347312	Down	Up	DownUp
ENSMUSG00000048911	Cortex	4.46206	Cortex	-0.738769	Development	-0.738769	-0.179644	Down	Down	DownDown
ENSMUSG00000048911	Cortex	4.46206	Cortex	-0.179644	Ageing	-0.738769	-0.179644	Down	Down	DownDown
ENSMUSG00000027350	Cortex	10.1381	Cortex	0.846881	Development	0.846881	-0.203596	Up	Down	UpDown
ENSMUSG00000027350	Cortex	10.1381	Cortex	-0.203596	Ageing	0.846881	-0.203596	Up	Down	UpDown
ENSMUSG00000034723	Cortex	5.94838	Cortex	0.991031	Development	0.991031	-0.431145	Up	Down	UpDown
ENSMUSG00000034723	Cortex	5.94838	Cortex	-0.431145	Ageing	0.991031	-0.431145	Up	Down	UpDown
ENSMUSG00000051177	Cortex	6.89329	Cortex	0.738769	Development	0.738769	-0.538932	Up	Down	UpDown
ENSMUSG00000051177	Cortex	6.89329	Cortex	-0.538932	Ageing	0.738769	-0.538932	Up	Down	UpDown
ENSMUSG00000027273	Cortex	9.30115	Cortex	0.927273	Development	0.927273	-0.418189	Up	Down	UpDown
ENSMUSG00000027273	Cortex	9.30115	Cortex	-0.418189	Ageing	0.927273	-0.418189	Up	Down	UpDown
ENSMUSG00000027419	Cortex	10.7568	Cortex	0.792825	Development	0.792825	0.179644	Up	Up	UpUp
ENSMUSG00000027419	Cortex	10.7568	Cortex	0.179644	Ageing	0.792825	0.179644	Up	Up	UpUp
ENSMUSG00000037259	Cortex	5.52003	Cortex	0.991031	Development	0.991031	-0.0958101	Up	Down	UpDown
ENSMUSG00000037259	Cortex	5.52003	Cortex	-0.0958101	Ageing	0.991031	-0.0958101	Up	Down	UpDown
ENSMUSG00000027430	Cortex	6.75614	Cortex	0.954994	Development	0.954994	-0.155691	Up	Down	UpDown
ENSMUSG00000027430	Cortex	6.75614	Cortex	-0.155691	Ageing	0.954994	-0.155691	Up	Down	UpDown
ENSMUSG00000063873	Cortex	5.54061	Cortex	0.630656	Development	0.630656	-0.946125	Up	Down	UpDown
ENSMUSG00000063873	Cortex	5.54061	Cortex	-0.946125	Ageing	0.630656	-0.946125	Up	Down	UpDown
ENSMUSG00000027438	Cortex	6.12424	Cortex	0.882919	Development	0.882919	-0.682647	Up	Down	UpDown
ENSMUSG00000027438	Cortex	6.12424	Cortex	-0.682647	Ageing	0.882919	-0.682647	Up	Down	UpDown
ENSMUSG00000027457	Cortex	6.83722	Cortex	0.954994	Development	0.954994	0.174699	Up	Up	UpUp
ENSMUSG00000027457	Cortex	6.83722	Cortex	0.174699	Ageing	0.954994	0.174699	Up	Up	UpUp
ENSMUSG00000074671	Cortex	4.77936	Cortex	-0.594619	Development	-0.594619	0.131739	Down	Up	DownUp
ENSMUSG00000074671	Cortex	4.77936	Cortex	0.131739	Ageing	-0.594619	0.131739	Down	Up	DownUp
ENSMUSG00000027475	Cortex	4.91922	Cortex	-0.882919	Development	-0.882919	-0.598813	Down	Down	DownDown
ENSMUSG00000027475	Cortex	4.91922	Cortex	-0.598813	Ageing	-0.882919	-0.598813	Down	Down	DownDown
ENSMUSG00000027489	Cortex	4.54543	Cortex	0.630656	Development	0.630656	0.203596	Up	Up	UpUp
ENSMUSG00000027489	Cortex	4.54543	Cortex	0.203596	Ageing	0.630656	0.203596	Up	Up	UpUp
ENSMUSG00000047459	Cortex	6.60805	Cortex	-0.727273	Development	-0.727273	-0.307229	Down	Down	DownDown
ENSMUSG00000047459	Cortex	6.60805	Cortex	-0.307229	Ageing	-0.727273	-0.307229	Down	Down	DownDown
ENSMUSG00000027603	Cortex	11.6352	Cortex	0.828862	Development	0.828862	0.0479051	Up	Up	UpUp
ENSMUSG00000027603	Cortex	11.6352	Cortex	0.0479051	Ageing	0.828862	0.0479051	Up	Up	UpUp
ENSMUSG00000027612	Cortex	9.27668	Cortex	-0.991031	Development	-0.991031	-0.275454	Down	Down	DownDown
ENSMUSG00000027612	Cortex	9.27668	Cortex	-0.275454	Ageing	-0.991031	-0.275454	Down	Down	DownDown
ENSMUSG00000038116	Cortex	5.49811	Cortex	-0.738769	Development	-0.738769	-0.503003	Down	Down	DownDown
ENSMUSG00000038116	Cortex	5.49811	Cortex	-0.503003	Ageing	-0.738769	-0.503003	Down	Down	DownDown
ENSMUSG00000027624	Cortex	7.48618	Cortex	0.954994	Development	0.954994	-0.239525	Up	Down	UpDown
ENSMUSG00000027624	Cortex	7.48618	Cortex	-0.239525	Ageing	0.954994	-0.239525	Up	Down	UpDown
ENSMUSG00000027634	Cortex	6.68325	Cortex	0.666694	Development	0.666694	0.0479051	Up	Up	UpUp
ENSMUSG00000027634	Cortex	6.68325	Cortex	0.0479051	Ageing	0.666694	0.0479051	Up	Up	UpUp
ENSMUSG00000044349	Cortex	5.95608	Cortex	0.991031	Development	0.991031	-0.0120482	Up	Down	UpDown
ENSMUSG00000044349	Cortex	5.95608	Cortex	-0.0120482	Ageing	0.991031	-0.0120482	Up	Down	UpDown
ENSMUSG00000035576	Cortex	8.98716	Cortex	0.414431	Development	0.414431	0.227549	Up	Up	UpUp
ENSMUSG00000035576	Cortex	8.98716	Cortex	0.227549	Ageing	0.414431	0.227549	Up	Up	UpUp
ENSMUSG00000053141	Cortex	8.34152	Cortex	-0.450469	Development	-0.450469	-0.610789	Down	Down	DownDown
ENSMUSG00000053141	Cortex	8.34152	Cortex	-0.610789	Ageing	-0.450469	-0.610789	Down	Down	DownDown
ENSMUSG00000017943	Cortex	27.7558	Cortex	-0.666694	Development	-0.666694	0.323359	Down	Up	DownUp
ENSMUSG00000017943	Cortex	27.7558	Cortex	0.323359	Ageing	-0.666694	0.323359	Down	Up	DownUp
ENSMUSG00000035226	Cortex	5.96475	Cortex	0.486506	Development	0.486506	-0.467074	Up	Down	UpDown
ENSMUSG00000035226	Cortex	5.96475	Cortex	-0.467074	Ageing	0.486506	-0.467074	Up	Down	UpDown
ENSMUSG00000017740	Cortex	8.90648	Cortex	0.882919	Development	0.882919	-0.371264	Up	Down	UpDown
ENSMUSG00000017740	Cortex	8.90648	Cortex	-0.371264	Ageing	0.882919	-0.371264	Up	Down	UpDown
ENSMUSG00000039671	Cortex	4.59845	Cortex	0.702731	Development	0.702731	-0.586837	Up	Down	UpDown
ENSMUSG00000039671	Cortex	4.59845	Cortex	-0.586837	Ageing	0.702731	-0.586837	Up	Down	UpDown
ENSMUSG00000074575	Cortex	14.8645	Cortex	0.306319	Development	0.306319	-0.239525	Up	Down	UpDown
ENSMUSG00000074575	Cortex	14.8645	Cortex	-0.239525	Ageing	0.306319	-0.239525	Up	Down	UpDown
ENSMUSG00000027546	Cortex	6.06377	Cortex	-0.594619	Development	-0.594619	-0.0239525	Down	Down	DownDown
ENSMUSG00000027546	Cortex	6.06377	Cortex	-0.0239525	Ageing	-0.594619	-0.0239525	Down	Down	DownDown
ENSMUSG00000070476	Cortex	5.91223	Cortex	0.846881	Development	0.846881	0.311383	Up	Up	UpUp
ENSMUSG00000070476	Cortex	5.91223	Cortex	0.311383	Ageing	0.846881	0.311383	Up	Up	UpUp
ENSMUSG00000000305	Cortex	5.03304	Cortex	-0.882919	Development	-0.882919	-0.38324	Down	Down	DownDown
ENSMUSG00000000305	Cortex	5.03304	Cortex	-0.38324	Ageing	-0.882919	-0.38324	Down	Down	DownDown
ENSMUSG00000027525	Cortex	22.4331	Cortex	0.504525	Development	0.504525	0.323359	Up	Up	UpUp
ENSMUSG00000027525	Cortex	22.4331	Cortex	0.323359	Ageing	0.504525	0.323359	Up	Up	UpUp
ENSMUSG00000039086	Cortex	6.45722	Cortex	-0.991031	Development	-0.991031	0.479051	Down	Up	DownUp
ENSMUSG00000039086	Cortex	6.45722	Cortex	0.479051	Ageing	-0.991031	0.479051	Down	Up	DownUp
ENSMUSG00000027577	Cortex	7.34218	Cortex	0.378394	Development	0.378394	0.19162	Up	Up	UpUp
ENSMUSG00000027577	Cortex	7.34218	Cortex	0.19162	Ageing	0.378394	0.19162	Up	Up	UpUp
ENSMUSG00000016346	Cortex	29.1522	Cortex	0.666694	Development	0.666694	-0.694623	Up	Down	UpDown
ENSMUSG00000016346	Cortex	29.1522	Cortex	-0.694623	Ageing	0.666694	-0.694623	Up	Down	UpDown
ENSMUSG00000027581	Cortex	23.7383	Cortex	-0.630656	Development	-0.630656	-0.433735	Down	Down	DownDown
ENSMUSG00000027581	Cortex	23.7383	Cortex	-0.433735	Ageing	-0.630656	-0.433735	Down	Down	DownDown
ENSMUSG00000000826	Cortex	6.06912	Cortex	-0.810844	Development	-0.810844	-0.658694	Down	Down	DownDown
ENSMUSG00000000826	Cortex	6.06912	Cortex	-0.658694	Ageing	-0.810844	-0.658694	Down	Down	DownDown
ENSMUSG00000027500	Cortex	4.66814	Cortex	-0.792825	Development	-0.792825	-0.311383	Down	Down	DownDown
ENSMUSG00000027500	Cortex	4.66814	Cortex	-0.311383	Ageing	-0.792825	-0.311383	Down	Down	DownDown
ENSMUSG00000025128	Cortex	7.18784	Cortex	-0.991031	Development	-0.991031	-0.730552	Down	Down	DownDown
ENSMUSG00000025128	Cortex	7.18784	Cortex	-0.730552	Ageing	-0.991031	-0.730552	Down	Down	DownDown
ENSMUSG00000063887	Cortex	23.1772	Cortex	0.0180187	Development	0.0180187	-0.0239525	Up	Down	UpDown
ENSMUSG00000063887	Cortex	23.1772	Cortex	-0.0239525	Ageing	0.0180187	-0.0239525	Up	Down	UpDown
ENSMUSG00000069072	Cortex	9.61577	Cortex	0.991031	Development	0.991031	-0.0479051	Up	Down	UpDown
ENSMUSG00000069072	Cortex	9.61577	Cortex	-0.0479051	Ageing	0.991031	-0.0479051	Up	Down	UpDown
ENSMUSG00000027692	Cortex	4.64136	Cortex	-0.0540562	Development	-0.0540562	-0.778457	Down	Down	DownDown
ENSMUSG00000027692	Cortex	4.64136	Cortex	-0.778457	Ageing	-0.0540562	-0.778457	Down	Down	DownDown
ENSMUSG00000027674	Cortex	7.38685	Cortex	0.738769	Development	0.738769	-0.38324	Up	Down	UpDown
ENSMUSG00000027674	Cortex	7.38685	Cortex	-0.38324	Ageing	0.738769	-0.38324	Up	Down	UpDown
ENSMUSG00000037400	Cortex	5.00144	Cortex	0.324337	Development	0.324337	-0.155691	Up	Down	UpDown
ENSMUSG00000037400	Cortex	5.00144	Cortex	-0.155691	Ageing	0.324337	-0.155691	Up	Down	UpDown
ENSMUSG00000033883	Cortex	5.28002	Cortex	-0.558581	Development	-0.558581	-0.754505	Down	Down	DownDown
ENSMUSG00000033883	Cortex	5.28002	Cortex	-0.754505	Ageing	-0.558581	-0.754505	Down	Down	DownDown
ENSMUSG00000049100	Cortex	21.9448	Cortex	0.0540562	Development	0.0540562	-0.706599	Up	Down	UpDown
ENSMUSG00000049100	Cortex	21.9448	Cortex	-0.706599	Ageing	0.0540562	-0.706599	Up	Down	UpDown
ENSMUSG00000027748	Cortex	11.3663	Cortex	-0.900937	Development	-0.900937	-0.514979	Down	Down	DownDown
ENSMUSG00000027748	Cortex	11.3663	Cortex	-0.514979	Ageing	-0.900937	-0.514979	Down	Down	DownDown
ENSMUSG00000027799	Cortex	6.27935	Cortex	-0.991031	Development	-0.991031	-0.259036	Down	Down	DownDown
ENSMUSG00000027799	Cortex	6.27935	Cortex	-0.259036	Ageing	-0.991031	-0.259036	Down	Down	DownDown
ENSMUSG00000056476	Cortex	4.85111	Cortex	0.882919	Development	0.882919	-0.658694	Up	Down	UpDown
ENSMUSG00000056476	Cortex	4.85111	Cortex	-0.658694	Ageing	0.882919	-0.658694	Up	Down	UpDown
ENSMUSG00000036834	Cortex	4.93706	Cortex	-0.774806	Development	-0.774806	0.131739	Down	Up	DownUp
ENSMUSG00000036834	Cortex	4.93706	Cortex	0.131739	Ageing	-0.774806	0.131739	Down	Up	DownUp
ENSMUSG00000027827	Cortex	4.63122	Cortex	0.991031	Development	0.991031	0.323359	Up	Up	UpUp
ENSMUSG00000027827	Cortex	4.63122	Cortex	0.323359	Ageing	0.991031	0.323359	Up	Up	UpUp
ENSMUSG00000027797	Cortex	8.84986	Cortex	0.126131	Development	0.126131	-0.850315	Up	Down	UpDown
ENSMUSG00000027797	Cortex	8.84986	Cortex	-0.850315	Ageing	0.126131	-0.850315	Up	Down	UpDown
ENSMUSG00000102422	Cortex	7.37115	Cortex	-0.792825	Development	-0.792825	0.227549	Down	Up	DownUp
ENSMUSG00000102422	Cortex	7.37115	Cortex	0.227549	Ageing	-0.792825	0.227549	Down	Up	DownUp
ENSMUSG00000027834	Cortex	8.91801	Cortex	0.882919	Development	0.882919	-0.239525	Up	Down	UpDown
ENSMUSG00000027834	Cortex	8.91801	Cortex	-0.239525	Ageing	0.882919	-0.239525	Up	Down	UpDown
ENSMUSG00000028020	Cortex	12.1977	Cortex	0.774806	Development	0.774806	-0.455098	Up	Down	UpDown
ENSMUSG00000028020	Cortex	12.1977	Cortex	-0.455098	Ageing	0.774806	-0.455098	Up	Down	UpDown
ENSMUSG00000033981	Cortex	35.5734	Cortex	-0.234244	Development	-0.234244	-0.838338	Down	Down	DownDown
ENSMUSG00000033981	Cortex	35.5734	Cortex	-0.838338	Ageing	-0.234244	-0.838338	Down	Down	DownDown
ENSMUSG00000033900	Cortex	10.4975	Cortex	-0.882919	Development	-0.882919	-0.622766	Down	Down	DownDown
ENSMUSG00000033900	Cortex	10.4975	Cortex	-0.622766	Ageing	-0.882919	-0.622766	Down	Down	DownDown
ENSMUSG00000028086	Cortex	5.4592	Cortex	0.72075	Development	0.72075	-0.634742	Up	Down	UpDown
ENSMUSG00000028086	Cortex	5.4592	Cortex	-0.634742	Ageing	0.72075	-0.634742	Up	Down	UpDown
ENSMUSG00000027993	Cortex	6.41785	Cortex	-0.774806	Development	-0.774806	-0.574861	Down	Down	DownDown
ENSMUSG00000027993	Cortex	6.41785	Cortex	-0.574861	Ageing	-0.774806	-0.574861	Down	Down	DownDown
ENSMUSG00000028078	Cortex	6.02931	Cortex	-0.882919	Development	-0.882919	-0.407193	Down	Down	DownDown
ENSMUSG00000028078	Cortex	6.02931	Cortex	-0.407193	Ageing	-0.882919	-0.407193	Down	Down	DownDown
ENSMUSG00000004892	Cortex	7.60475	Cortex	0.882919	Development	0.882919	-0.0359288	Up	Down	UpDown
ENSMUSG00000004892	Cortex	7.60475	Cortex	-0.0359288	Ageing	0.882919	-0.0359288	Up	Down	UpDown
ENSMUSG00000068923	Cortex	11.4389	Cortex	0.846881	Development	0.846881	-0.503003	Up	Down	UpDown
ENSMUSG00000068923	Cortex	11.4389	Cortex	-0.503003	Ageing	0.846881	-0.503003	Up	Down	UpDown
ENSMUSG00000042672	Cortex	6.75138	Cortex	0.846881	Development	0.846881	0.311383	Up	Up	UpUp
ENSMUSG00000042672	Cortex	6.75138	Cortex	0.311383	Ageing	0.846881	0.311383	Up	Up	UpUp
ENSMUSG00000042766	Cortex	13.0275	Cortex	-0.846881	Development	-0.846881	0.227549	Down	Up	DownUp
ENSMUSG00000042766	Cortex	13.0275	Cortex	0.227549	Ageing	-0.846881	0.227549	Down	Up	DownUp
ENSMUSG00000000794	Cortex	4.68154	Cortex	0.414431	Development	0.414431	-0.0598813	Up	Down	UpDown
ENSMUSG00000000794	Cortex	4.68154	Cortex	-0.0598813	Ageing	0.414431	-0.0598813	Up	Down	UpDown
ENSMUSG00000027950	Cortex	14.1606	Cortex	-0.666694	Development	-0.666694	-0.431145	Down	Down	DownDown
ENSMUSG00000027950	Cortex	14.1606	Cortex	-0.431145	Ageing	-0.666694	-0.431145	Down	Down	DownDown
ENSMUSG00000028136	Cortex	4.45207	Cortex	-0.666694	Development	-0.666694	-0.395217	Down	Down	DownDown
ENSMUSG00000028136	Cortex	4.45207	Cortex	-0.395217	Ageing	-0.666694	-0.395217	Down	Down	DownDown
ENSMUSG00000028137	Cortex	23.6905	Cortex	-0.810844	Development	-0.810844	-0.299407	Down	Down	DownDown
ENSMUSG00000028137	Cortex	23.6905	Cortex	-0.299407	Ageing	-0.810844	-0.299407	Down	Down	DownDown
ENSMUSG00000053192	Cortex	4.99753	Cortex	-0.702731	Development	-0.702731	-0.694623	Down	Down	DownDown
ENSMUSG00000053192	Cortex	4.99753	Cortex	-0.694623	Ageing	-0.702731	-0.694623	Down	Down	DownDown
ENSMUSG00000038486	Cortex	18.2226	Cortex	0.666694	Development	0.666694	-0.0359288	Up	Down	UpDown
ENSMUSG00000038486	Cortex	18.2226	Cortex	-0.0359288	Ageing	0.666694	-0.0359288	Up	Down	UpDown
ENSMUSG00000049097	Cortex	9.01384	Cortex	0.666694	Development	0.666694	0.311383	Up	Up	UpUp
ENSMUSG00000049097	Cortex	9.01384	Cortex	0.311383	Ageing	0.666694	0.311383	Up	Up	UpUp
ENSMUSG00000027849	Cortex	10.4965	Cortex	-0.702731	Development	-0.702731	-0.263478	Down	Down	DownDown
ENSMUSG00000027849	Cortex	10.4965	Cortex	-0.263478	Ageing	-0.702731	-0.263478	Down	Down	DownDown
ENSMUSG00000040896	Cortex	21.1868	Cortex	0.0180187	Development	0.0180187	-0.38324	Up	Down	UpDown
ENSMUSG00000040896	Cortex	21.1868	Cortex	-0.38324	Ageing	0.0180187	-0.38324	Up	Down	UpDown
ENSMUSG00000027894	Cortex	9.12234	Cortex	0.846881	Development	0.846881	-0.742528	Up	Down	UpDown
ENSMUSG00000027894	Cortex	9.12234	Cortex	-0.742528	Ageing	0.846881	-0.742528	Up	Down	UpDown
ENSMUSG00000040389	Cortex	6.14555	Cortex	-0.936975	Development	-0.936975	-0.167668	Down	Down	DownDown
ENSMUSG00000040389	Cortex	6.14555	Cortex	-0.167668	Ageing	-0.936975	-0.167668	Down	Down	DownDown
ENSMUSG00000068696	Cortex	5.2747	Cortex	0.900937	Development	0.900937	0.395217	Up	Up	UpUp
ENSMUSG00000068696	Cortex	5.2747	Cortex	0.395217	Ageing	0.900937	0.395217	Up	Up	UpUp
ENSMUSG00000033342	Cortex	16.3678	Cortex	-0.630656	Development	-0.630656	-0.550908	Down	Down	DownDown
ENSMUSG00000033342	Cortex	16.3678	Cortex	-0.550908	Ageing	-0.630656	-0.550908	Down	Down	DownDown
ENSMUSG00000044667	Cortex	13.4507	Cortex	0.630656	Development	0.630656	-0.790433	Up	Down	UpDown
ENSMUSG00000044667	Cortex	13.4507	Cortex	-0.790433	Ageing	0.630656	-0.790433	Up	Down	UpDown
ENSMUSG00000028134	Cortex	5.03405	Cortex	-0.954994	Development	-0.954994	-0.359288	Down	Down	DownDown
ENSMUSG00000028134	Cortex	5.03405	Cortex	-0.359288	Ageing	-0.954994	-0.359288	Down	Down	DownDown
ENSMUSG00000044528	Cortex	10.6968	Cortex	0.738769	Development	0.738769	-0.455098	Up	Down	UpDown
ENSMUSG00000044528	Cortex	10.6968	Cortex	-0.455098	Ageing	0.738769	-0.455098	Up	Down	UpDown
ENSMUSG00000044365	Cortex	7.66502	Cortex	-0.846881	Development	-0.846881	-0.263478	Down	Down	DownDown
ENSMUSG00000044365	Cortex	7.66502	Cortex	-0.263478	Ageing	-0.846881	-0.263478	Down	Down	DownDown
ENSMUSG00000028149	Cortex	4.5965	Cortex	0.709091	Development	0.709091	0.0239525	Up	Up	UpUp
ENSMUSG00000028149	Cortex	4.5965	Cortex	0.0239525	Ageing	0.709091	0.0239525	Up	Up	UpUp
ENSMUSG00000028266	Cortex	5.37418	Cortex	-0.846881	Development	-0.846881	0.203596	Down	Up	DownUp
ENSMUSG00000028266	Cortex	5.37418	Cortex	0.203596	Ageing	-0.846881	0.203596	Down	Up	DownUp
ENSMUSG00000005034	Cortex	6.2734	Cortex	0.630656	Development	0.630656	-0.0239525	Up	Down	UpDown
ENSMUSG00000005034	Cortex	6.2734	Cortex	-0.0239525	Ageing	0.630656	-0.0239525	Up	Down	UpDown
ENSMUSG00000039058	Cortex	6.45887	Cortex	0.882919	Development	0.882919	-0.263478	Up	Down	UpDown
ENSMUSG00000039058	Cortex	6.45887	Cortex	-0.263478	Ageing	0.882919	-0.263478	Up	Down	UpDown
ENSMUSG00000039037	Cortex	14.1152	Cortex	-0.126131	Development	-0.126131	-0.107786	Down	Down	DownDown
ENSMUSG00000039037	Cortex	14.1152	Cortex	-0.107786	Ageing	-0.126131	-0.107786	Down	Down	DownDown
ENSMUSG00000028360	Cortex	5.76077	Cortex	-0.846881	Development	-0.846881	-0.526956	Down	Down	DownDown
ENSMUSG00000028360	Cortex	5.76077	Cortex	-0.526956	Ageing	-0.846881	-0.526956	Down	Down	DownDown
ENSMUSG00000040037	Cortex	16.2908	Cortex	-0.126131	Development	-0.126131	-0.771084	Down	Down	DownDown
ENSMUSG00000040037	Cortex	16.2908	Cortex	-0.771084	Ageing	-0.126131	-0.771084	Down	Down	DownDown
ENSMUSG00000028232	Cortex	4.622	Cortex	0.072075	Development	0.072075	-0.682647	Up	Down	UpDown
ENSMUSG00000028232	Cortex	4.622	Cortex	-0.682647	Ageing	0.072075	-0.682647	Up	Down	UpDown
ENSMUSG00000028176	Cortex	23.081	Cortex	0.738769	Development	0.738769	-0.89822	Up	Down	UpDown
ENSMUSG00000028176	Cortex	23.081	Cortex	-0.89822	Ageing	0.738769	-0.89822	Up	Down	UpDown
ENSMUSG00000028243	Cortex	5.29798	Cortex	0.684712	Development	0.684712	-0.790433	Up	Down	UpDown
ENSMUSG00000028243	Cortex	5.29798	Cortex	-0.790433	Ageing	0.684712	-0.790433	Up	Down	UpDown
ENSMUSG00000006586	Cortex	5.35728	Cortex	-0.828862	Development	-0.828862	-0.371264	Down	Down	DownDown
ENSMUSG00000006586	Cortex	5.35728	Cortex	-0.371264	Ageing	-0.828862	-0.371264	Down	Down	DownDown
ENSMUSG00000041216	Cortex	20.4984	Cortex	-0.360375	Development	-0.360375	-0.670671	Down	Down	DownDown
ENSMUSG00000041216	Cortex	20.4984	Cortex	-0.670671	Ageing	-0.360375	-0.670671	Down	Down	DownDown
ENSMUSG00000028246	Cortex	11.0467	Cortex	-0.936975	Development	-0.936975	-0.814386	Down	Down	DownDown
ENSMUSG00000028246	Cortex	11.0467	Cortex	-0.814386	Ageing	-0.936975	-0.814386	Down	Down	DownDown
ENSMUSG00000040387	Cortex	13.0286	Cortex	-0.630656	Development	-0.630656	-0.922172	Down	Down	DownDown
ENSMUSG00000040387	Cortex	13.0286	Cortex	-0.922172	Ageing	-0.630656	-0.922172	Down	Down	DownDown
ENSMUSG00000055373	Cortex	25.2957	Cortex	0.126131	Development	0.126131	-0.491027	Up	Down	UpDown
ENSMUSG00000055373	Cortex	25.2957	Cortex	-0.491027	Ageing	0.126131	-0.491027	Up	Down	UpDown
ENSMUSG00000028289	Cortex	10.7547	Cortex	-0.774806	Development	-0.774806	-0.239525	Down	Down	DownDown
ENSMUSG00000028289	Cortex	10.7547	Cortex	-0.239525	Ageing	-0.774806	-0.239525	Down	Down	DownDown
ENSMUSG00000040183	Cortex	5.66717	Cortex	0.324337	Development	0.324337	-0.431145	Up	Down	UpDown
ENSMUSG00000040183	Cortex	5.66717	Cortex	-0.431145	Ageing	0.324337	-0.431145	Up	Down	UpDown
ENSMUSG00000044288	Cortex	15.1334	Cortex	-0.846881	Development	-0.846881	-0.586837	Down	Down	DownDown
ENSMUSG00000044288	Cortex	15.1334	Cortex	-0.586837	Ageing	-0.846881	-0.586837	Down	Down	DownDown
ENSMUSG00000028430	Cortex	4.96683	Cortex	0.126131	Development	0.126131	0.0479051	Up	Up	UpUp
ENSMUSG00000028430	Cortex	4.96683	Cortex	0.0479051	Ageing	0.126131	0.0479051	Up	Up	UpUp
ENSMUSG00000028439	Cortex	4.50059	Cortex	0.666694	Development	0.666694	0	Up	Down	UpDown
ENSMUSG00000028439	Cortex	4.50059	Cortex	0	Ageing	0.666694	0	Up	Down	UpDown
ENSMUSG00000073877	Cortex	4.41939	Cortex	0.072075	Development	0.072075	0.131739	Up	Up	UpUp
ENSMUSG00000073877	Cortex	4.41939	Cortex	0.131739	Ageing	0.072075	0.131739	Up	Up	UpUp
ENSMUSG00000036062	Cortex	12.4876	Cortex	0.666694	Development	0.666694	0.0958101	Up	Up	UpUp
ENSMUSG00000036062	Cortex	12.4876	Cortex	0.0958101	Ageing	0.666694	0.0958101	Up	Up	UpUp
ENSMUSG00000073888	Cortex	5.15765	Cortex	-0.702731	Development	-0.702731	-0.0359288	Down	Down	DownDown
ENSMUSG00000073888	Cortex	5.15765	Cortex	-0.0359288	Ageing	-0.702731	-0.0359288	Down	Down	DownDown
ENSMUSG00000078716	Cortex	4.82458	Cortex	0.414431	Development	0.414431	-0.251502	Up	Down	UpDown
ENSMUSG00000078716	Cortex	4.82458	Cortex	-0.251502	Ageing	0.414431	-0.251502	Up	Down	UpDown
ENSMUSG00000028467	Cortex	7.99768	Cortex	0.846881	Development	0.846881	-0.586837	Up	Down	UpDown
ENSMUSG00000028467	Cortex	7.99768	Cortex	-0.586837	Ageing	0.846881	-0.586837	Up	Down	UpDown
ENSMUSG00000039809	Cortex	4.82267	Cortex	0.666694	Development	0.666694	0.0838338	Up	Up	UpUp
ENSMUSG00000039809	Cortex	4.82267	Cortex	0.0838338	Ageing	0.666694	0.0838338	Up	Up	UpUp
ENSMUSG00000039740	Cortex	7.27474	Cortex	-0.900937	Development	-0.900937	0.0479051	Down	Up	DownUp
ENSMUSG00000039740	Cortex	7.27474	Cortex	0.0479051	Ageing	-0.900937	0.0479051	Down	Up	DownUp
ENSMUSG00000039579	Cortex	9.57668	Cortex	-0.558581	Development	-0.558581	-0.790433	Down	Down	DownDown
ENSMUSG00000039579	Cortex	9.57668	Cortex	-0.790433	Ageing	-0.558581	-0.790433	Down	Down	DownDown
ENSMUSG00000060206	Cortex	4.50002	Cortex	-0.810844	Development	-0.810844	-0.970077	Down	Down	DownDown
ENSMUSG00000060206	Cortex	4.50002	Cortex	-0.970077	Ageing	-0.810844	-0.970077	Down	Down	DownDown
ENSMUSG00000045589	Cortex	11.1283	Cortex	0.846881	Development	0.846881	-0.323359	Up	Down	UpDown
ENSMUSG00000045589	Cortex	11.1283	Cortex	-0.323359	Ageing	0.846881	-0.323359	Up	Down	UpDown
ENSMUSG00000039137	Cortex	4.5641	Cortex	0.900937	Development	0.900937	-0.562884	Up	Down	UpDown
ENSMUSG00000039137	Cortex	4.5641	Cortex	-0.562884	Ageing	0.900937	-0.562884	Up	Down	UpDown
ENSMUSG00000028351	Cortex	5.56265	Cortex	0.666694	Development	0.666694	-0.371264	Up	Down	UpDown
ENSMUSG00000028351	Cortex	5.56265	Cortex	-0.371264	Ageing	0.666694	-0.371264	Up	Down	UpDown
ENSMUSG00000051675	Cortex	9.29696	Cortex	0.180187	Development	0.180187	-0.119763	Up	Down	UpDown
ENSMUSG00000051675	Cortex	9.29696	Cortex	-0.119763	Ageing	0.180187	-0.119763	Up	Down	UpDown
ENSMUSG00000049122	Cortex	5.13491	Cortex	-0.900937	Development	-0.900937	-0.634742	Down	Down	DownDown
ENSMUSG00000049122	Cortex	5.13491	Cortex	-0.634742	Ageing	-0.900937	-0.634742	Down	Down	DownDown
ENSMUSG00000028488	Cortex	16.6558	Cortex	0.666694	Development	0.666694	-0.682647	Up	Down	UpDown
ENSMUSG00000028488	Cortex	16.6558	Cortex	-0.682647	Ageing	0.666694	-0.682647	Up	Down	UpDown
ENSMUSG00000028484	Cortex	5.78315	Cortex	-0.792825	Development	-0.792825	-0.251502	Down	Down	DownDown
ENSMUSG00000028484	Cortex	5.78315	Cortex	-0.251502	Ageing	-0.792825	-0.251502	Down	Down	DownDown
ENSMUSG00000048747	Cortex	4.46353	Cortex	-0.522544	Development	-0.522544	-0.0239525	Down	Down	DownDown
ENSMUSG00000048747	Cortex	4.46353	Cortex	-0.0239525	Ageing	-0.522544	-0.0239525	Down	Down	DownDown
ENSMUSG00000028528	Cortex	16.2213	Cortex	0.738769	Development	0.738769	-0.694623	Up	Down	UpDown
ENSMUSG00000028528	Cortex	16.2213	Cortex	-0.694623	Ageing	0.738769	-0.694623	Up	Down	UpDown
ENSMUSG00000028524	Cortex	7.94564	Cortex	0.594619	Development	0.594619	-0.658694	Up	Down	UpDown
ENSMUSG00000028524	Cortex	7.94564	Cortex	-0.658694	Ageing	0.594619	-0.658694	Up	Down	UpDown
ENSMUSG00000028519	Cortex	12.1273	Cortex	-0.810844	Development	-0.810844	-0.574861	Down	Down	DownDown
ENSMUSG00000028519	Cortex	12.1273	Cortex	-0.574861	Ageing	-0.810844	-0.574861	Down	Down	DownDown
ENSMUSG00000028613	Cortex	8.65635	Cortex	-0.991031	Development	-0.991031	-0.850315	Down	Down	DownDown
ENSMUSG00000028613	Cortex	8.65635	Cortex	-0.850315	Ageing	-0.991031	-0.850315	Down	Down	DownDown
ENSMUSG00000003411	Cortex	8.01315	Cortex	-0.558581	Development	-0.558581	-0.203596	Down	Down	DownDown
ENSMUSG00000003411	Cortex	8.01315	Cortex	-0.203596	Ageing	-0.558581	-0.203596	Down	Down	DownDown
ENSMUSG00000028546	Cortex	24.7948	Cortex	-0.882919	Development	-0.882919	-0.323359	Down	Down	DownDown
ENSMUSG00000028546	Cortex	24.7948	Cortex	-0.323359	Ageing	-0.882919	-0.323359	Down	Down	DownDown
ENSMUSG00000028677	Cortex	5.01163	Cortex	0.612637	Development	0.612637	0.0598813	Up	Up	UpUp
ENSMUSG00000028677	Cortex	5.01163	Cortex	0.0598813	Ageing	0.612637	0.0598813	Up	Up	UpUp
ENSMUSG00000032890	Cortex	8.45826	Cortex	-0.2883	Development	-0.2883	0.0119763	Down	Up	DownUp
ENSMUSG00000032890	Cortex	8.45826	Cortex	0.0119763	Ageing	-0.2883	0.0119763	Down	Up	DownUp
ENSMUSG00000046093	Cortex	5.67605	Cortex	0.954994	Development	0.954994	-0.658694	Up	Down	UpDown
ENSMUSG00000046093	Cortex	5.67605	Cortex	-0.658694	Ageing	0.954994	-0.658694	Up	Down	UpDown
ENSMUSG00000090125	Cortex	4.77182	Cortex	-0.918956	Development	-0.918956	0.503003	Down	Up	DownUp
ENSMUSG00000090125	Cortex	4.77182	Cortex	0.503003	Ageing	-0.918956	0.503003	Down	Up	DownUp
ENSMUSG00000042763	Cortex	32.5291	Cortex	0.270281	Development	0.270281	0.391566	Up	Up	UpUp
ENSMUSG00000042763	Cortex	32.5291	Cortex	0.391566	Ageing	0.270281	0.391566	Up	Up	UpUp
ENSMUSG00000028863	Cortex	6.93887	Cortex	-0.810844	Development	-0.810844	-0.371264	Down	Down	DownDown
ENSMUSG00000028863	Cortex	6.93887	Cortex	-0.371264	Ageing	-0.810844	-0.371264	Down	Down	DownDown
ENSMUSG00000001985	Cortex	20.0064	Cortex	-0.882919	Development	-0.882919	-0.347312	Down	Down	DownDown
ENSMUSG00000001985	Cortex	20.0064	Cortex	-0.347312	Ageing	-0.882919	-0.347312	Down	Down	DownDown
ENSMUSG00000028833	Cortex	8.31956	Cortex	0.954994	Development	0.954994	-0.409639	Up	Down	UpDown
ENSMUSG00000028833	Cortex	8.31956	Cortex	-0.409639	Ageing	0.954994	-0.409639	Up	Down	UpDown
ENSMUSG00000042388	Cortex	8.24179	Cortex	0.846881	Development	0.846881	0.598813	Up	Up	UpUp
ENSMUSG00000042388	Cortex	8.24179	Cortex	0.598813	Ageing	0.846881	0.598813	Up	Up	UpUp
ENSMUSG00000028804	Cortex	19.6132	Cortex	-0.846881	Development	-0.846881	0	Down	Down	DownDown
ENSMUSG00000028804	Cortex	19.6132	Cortex	0	Ageing	-0.846881	0	Down	Down	DownDown
ENSMUSG00000028785	Cortex	8.61834	Cortex	0.954994	Development	0.954994	0.239525	Up	Up	UpUp
ENSMUSG00000028785	Cortex	8.61834	Cortex	0.239525	Ageing	0.954994	0.239525	Up	Up	UpUp
ENSMUSG00000028782	Cortex	9.90827	Cortex	0.882919	Development	0.882919	0.203596	Up	Up	UpUp
ENSMUSG00000028782	Cortex	9.90827	Cortex	0.203596	Ageing	0.882919	0.203596	Up	Up	UpUp
ENSMUSG00000056596	Cortex	5.22519	Cortex	0.991031	Development	0.991031	0.650602	Up	Up	UpUp
ENSMUSG00000056596	Cortex	5.22519	Cortex	0.650602	Ageing	0.991031	0.650602	Up	Up	UpUp
ENSMUSG00000045349	Cortex	5.91022	Cortex	0.936975	Development	0.936975	0.299407	Up	Up	UpUp
ENSMUSG00000045349	Cortex	5.91022	Cortex	0.299407	Ageing	0.936975	0.299407	Up	Up	UpUp
ENSMUSG00000040972	Cortex	21.0318	Cortex	0.14415	Development	0.14415	-0.251502	Up	Down	UpDown
ENSMUSG00000040972	Cortex	21.0318	Cortex	-0.251502	Ageing	0.14415	-0.251502	Up	Down	UpDown
ENSMUSG00000029016	Cortex	6.80454	Cortex	-0.774806	Development	-0.774806	0.215573	Down	Up	DownUp
ENSMUSG00000029016	Cortex	6.80454	Cortex	0.215573	Ageing	-0.774806	0.215573	Down	Up	DownUp
ENSMUSG00000029001	Cortex	5.30077	Cortex	0.991031	Development	0.991031	0.826362	Up	Up	UpUp
ENSMUSG00000029001	Cortex	5.30077	Cortex	0.826362	Ageing	0.991031	0.826362	Up	Up	UpUp
ENSMUSG00000028937	Cortex	4.87254	Cortex	-0.427273	Development	-0.427273	-0.145457	Down	Down	DownDown
ENSMUSG00000028937	Cortex	4.87254	Cortex	-0.145457	Ageing	-0.427273	-0.145457	Down	Down	DownDown
ENSMUSG00000039546	Cortex	12.3288	Cortex	0.882919	Development	0.882919	-0.634742	Up	Down	UpDown
ENSMUSG00000039546	Cortex	12.3288	Cortex	-0.634742	Ageing	0.882919	-0.634742	Up	Down	UpDown
ENSMUSG00000039577	Cortex	5.92506	Cortex	0.900937	Development	0.900937	0.682647	Up	Up	UpUp
ENSMUSG00000039577	Cortex	5.92506	Cortex	0.682647	Ageing	0.900937	0.682647	Up	Up	UpUp
ENSMUSG00000005045	Cortex	58.633	Cortex	-0.0900937	Development	-0.0900937	-0.299407	Down	Down	DownDown
ENSMUSG00000005045	Cortex	58.633	Cortex	-0.299407	Ageing	-0.0900937	-0.299407	Down	Down	DownDown
ENSMUSG00000084845	Cortex	13.2104	Cortex	0.702731	Development	0.702731	0.239525	Up	Up	UpUp
ENSMUSG00000084845	Cortex	13.2104	Cortex	0.239525	Ageing	0.702731	0.239525	Up	Up	UpUp
ENSMUSG00000040570	Cortex	10.5597	Cortex	-0.900937	Development	-0.900937	0.0359288	Down	Up	DownUp
ENSMUSG00000040570	Cortex	10.5597	Cortex	0.0359288	Ageing	-0.900937	0.0359288	Down	Up	DownUp
ENSMUSG00000056004	Cortex	7.76517	Cortex	-0.828862	Development	-0.828862	-0.0598813	Down	Down	DownDown
ENSMUSG00000056004	Cortex	7.76517	Cortex	-0.0598813	Ageing	-0.828862	-0.0598813	Down	Down	DownDown
ENSMUSG00000061601	Cortex	21.5923	Cortex	0.846881	Development	0.846881	-0.0239525	Up	Down	UpDown
ENSMUSG00000061601	Cortex	21.5923	Cortex	-0.0239525	Ageing	0.846881	-0.0239525	Up	Down	UpDown
ENSMUSG00000040003	Cortex	17.4473	Cortex	0.846881	Development	0.846881	-0.0479051	Up	Down	UpDown
ENSMUSG00000040003	Cortex	17.4473	Cortex	-0.0479051	Ageing	0.846881	-0.0479051	Up	Down	UpDown
ENSMUSG00000040537	Cortex	11.6433	Cortex	0.738769	Development	0.738769	-0.598813	Up	Down	UpDown
ENSMUSG00000040537	Cortex	11.6433	Cortex	-0.598813	Ageing	0.738769	-0.598813	Up	Down	UpDown
ENSMUSG00000106379	Cortex	18.6103	Cortex	0.126131	Development	0.126131	-0.203596	Up	Down	UpDown
ENSMUSG00000106379	Cortex	18.6103	Cortex	-0.203596	Ageing	0.126131	-0.203596	Up	Down	UpDown
ENSMUSG00000028969	Cortex	6.87867	Cortex	0.702731	Development	0.702731	0.359288	Up	Up	UpUp
ENSMUSG00000028969	Cortex	6.87867	Cortex	0.359288	Ageing	0.702731	0.359288	Up	Up	UpUp
ENSMUSG00000062604	Cortex	6.23839	Cortex	0.2883	Development	0.2883	-0.395217	Up	Down	UpDown
ENSMUSG00000062604	Cortex	6.23839	Cortex	-0.395217	Ageing	0.2883	-0.395217	Up	Down	UpDown
ENSMUSG00000023353	Cortex	6.43381	Cortex	0.702731	Development	0.702731	0.53012	Up	Up	UpUp
ENSMUSG00000023353	Cortex	6.43381	Cortex	0.53012	Ageing	0.702731	0.53012	Up	Up	UpUp
ENSMUSG00000028944	Cortex	4.92243	Cortex	-0.774806	Development	-0.774806	-0.395217	Down	Down	DownDown
ENSMUSG00000028944	Cortex	4.92243	Cortex	-0.395217	Ageing	-0.774806	-0.395217	Down	Down	DownDown
ENSMUSG00000056367	Cortex	5.69282	Cortex	0.378394	Development	0.378394	0.503003	Up	Up	UpUp
ENSMUSG00000056367	Cortex	5.69282	Cortex	0.503003	Ageing	0.378394	0.503003	Up	Up	UpUp
ENSMUSG00000061576	Cortex	14.2207	Cortex	0.991031	Development	0.991031	-0.766481	Up	Down	UpDown
ENSMUSG00000061576	Cortex	14.2207	Cortex	-0.766481	Ageing	0.991031	-0.766481	Up	Down	UpDown
ENSMUSG00000029131	Cortex	4.7009	Cortex	-0.936975	Development	-0.936975	-0.694623	Down	Down	DownDown
ENSMUSG00000029131	Cortex	4.7009	Cortex	-0.694623	Ageing	-0.936975	-0.694623	Down	Down	DownDown
ENSMUSG00000018965	Cortex	4.71851	Cortex	0.738769	Development	0.738769	-0.903614	Up	Down	UpDown
ENSMUSG00000018965	Cortex	4.71851	Cortex	-0.903614	Ageing	0.738769	-0.903614	Up	Down	UpDown
ENSMUSG00000037426	Cortex	4.83245	Cortex	-0.630656	Development	-0.630656	-0.778457	Down	Down	DownDown
ENSMUSG00000037426	Cortex	4.83245	Cortex	-0.778457	Ageing	-0.630656	-0.778457	Down	Down	DownDown
ENSMUSG00000048142	Cortex	5.38091	Cortex	0.846881	Development	0.846881	0.371264	Up	Up	UpUp
ENSMUSG00000048142	Cortex	5.38091	Cortex	0.371264	Ageing	0.846881	0.371264	Up	Up	UpUp
ENSMUSG00000037224	Cortex	6.44695	Cortex	0.846881	Development	0.846881	0.598813	Up	Up	UpUp
ENSMUSG00000037224	Cortex	6.44695	Cortex	0.598813	Ageing	0.846881	0.598813	Up	Up	UpUp
ENSMUSG00000037210	Cortex	4.54118	Cortex	-0.738769	Development	-0.738769	-0.299407	Down	Down	DownDown
ENSMUSG00000037210	Cortex	4.54118	Cortex	-0.299407	Ageing	-0.738769	-0.299407	Down	Down	DownDown
ENSMUSG00000029120	Cortex	22.9417	Cortex	0.846881	Development	0.846881	-0.0598813	Up	Down	UpDown
ENSMUSG00000029120	Cortex	22.9417	Cortex	-0.0598813	Ageing	0.846881	-0.0598813	Up	Down	UpDown
ENSMUSG00000063646	Cortex	7.74175	Cortex	0.378394	Development	0.378394	0.38324	Up	Up	UpUp
ENSMUSG00000063646	Cortex	7.74175	Cortex	0.38324	Ageing	0.378394	0.38324	Up	Up	UpUp
ENSMUSG00000029126	Cortex	4.59815	Cortex	-0.882919	Development	-0.882919	-0.610789	Down	Down	DownDown
ENSMUSG00000029126	Cortex	4.59815	Cortex	-0.610789	Ageing	-0.882919	-0.610789	Down	Down	DownDown
ENSMUSG00000015879	Cortex	7.49218	Cortex	-0.162169	Development	-0.162169	-0.359288	Down	Down	DownDown
ENSMUSG00000015879	Cortex	7.49218	Cortex	-0.359288	Ageing	-0.162169	-0.359288	Down	Down	DownDown
ENSMUSG00000029121	Cortex	7.3709	Cortex	-0.991031	Development	-0.991031	-0.562884	Down	Down	DownDown
ENSMUSG00000029121	Cortex	7.3709	Cortex	-0.562884	Ageing	-0.991031	-0.562884	Down	Down	DownDown
ENSMUSG00000029088	Cortex	8.76304	Cortex	0.666694	Development	0.666694	0.335335	Up	Up	UpUp
ENSMUSG00000029088	Cortex	8.76304	Cortex	0.335335	Ageing	0.666694	0.335335	Up	Up	UpUp
ENSMUSG00000029108	Cortex	6.55481	Cortex	0.126131	Development	0.126131	-0.419169	Up	Down	UpDown
ENSMUSG00000029108	Cortex	6.55481	Cortex	-0.419169	Ageing	0.126131	-0.419169	Up	Down	UpDown
ENSMUSG00000090061	Cortex	10.3994	Cortex	-0.936975	Development	-0.936975	-0.467074	Down	Down	DownDown
ENSMUSG00000090061	Cortex	10.3994	Cortex	-0.467074	Ageing	-0.936975	-0.467074	Down	Down	DownDown
ENSMUSG00000029223	Cortex	6.84464	Cortex	-0.648675	Development	-0.648675	0.313253	Down	Up	DownUp
ENSMUSG00000029223	Cortex	6.84464	Cortex	0.313253	Ageing	-0.648675	0.313253	Down	Up	DownUp
ENSMUSG00000029211	Cortex	5.85687	Cortex	0.738769	Development	0.738769	0.275454	Up	Up	UpUp
ENSMUSG00000029211	Cortex	5.85687	Cortex	0.275454	Ageing	0.738769	0.275454	Up	Up	UpUp
ENSMUSG00000029212	Cortex	10.1045	Cortex	0.774806	Development	0.774806	-0.754505	Up	Down	UpDown
ENSMUSG00000029212	Cortex	10.1045	Cortex	-0.754505	Ageing	0.774806	-0.754505	Up	Down	UpDown
ENSMUSG00000043635	Cortex	7.10438	Cortex	-0.882919	Development	-0.882919	0.0838338	Down	Up	DownUp
ENSMUSG00000043635	Cortex	7.10438	Cortex	0.0838338	Ageing	-0.882919	0.0838338	Down	Up	DownUp
ENSMUSG00000029291	Cortex	4.75718	Cortex	-0.828862	Development	-0.828862	-0.562884	Down	Down	DownDown
ENSMUSG00000029291	Cortex	4.75718	Cortex	-0.562884	Ageing	-0.828862	-0.562884	Down	Down	DownDown
ENSMUSG00000029405	Cortex	5.09039	Cortex	-0.378394	Development	-0.378394	-0.694623	Down	Down	DownDown
ENSMUSG00000029405	Cortex	5.09039	Cortex	-0.694623	Ageing	-0.378394	-0.694623	Down	Down	DownDown
ENSMUSG00000050640	Cortex	6.07111	Cortex	-0.828862	Development	-0.828862	-0.610789	Down	Down	DownDown
ENSMUSG00000050640	Cortex	6.07111	Cortex	-0.610789	Ageing	-0.828862	-0.610789	Down	Down	DownDown
ENSMUSG00000046709	Cortex	13.1731	Cortex	0.828862	Development	0.828862	-0.0239525	Up	Down	UpDown
ENSMUSG00000046709	Cortex	13.1731	Cortex	-0.0239525	Ageing	0.828862	-0.0239525	Up	Down	UpDown
ENSMUSG00000033805	Cortex	4.48931	Cortex	0.882919	Development	0.882919	0.203596	Up	Up	UpUp
ENSMUSG00000033805	Cortex	4.48931	Cortex	0.203596	Ageing	0.882919	0.203596	Up	Up	UpUp
ENSMUSG00000111375	Cortex	5.23444	Cortex	0.666694	Development	0.666694	0.251502	Up	Up	UpUp
ENSMUSG00000111375	Cortex	5.23444	Cortex	0.251502	Ageing	0.666694	0.251502	Up	Up	UpUp
ENSMUSG00000105867	Cortex	8.77592	Cortex	0.666694	Development	0.666694	0.826362	Up	Up	UpUp
ENSMUSG00000105867	Cortex	8.77592	Cortex	0.826362	Ageing	0.666694	0.826362	Up	Up	UpUp
ENSMUSG00000033615	Cortex	12.9771	Cortex	0.882919	Development	0.882919	0.143715	Up	Up	UpUp
ENSMUSG00000033615	Cortex	12.9771	Cortex	0.143715	Ageing	0.882919	0.143715	Up	Up	UpUp
ENSMUSG00000033316	Cortex	11.8719	Cortex	0.72075	Development	0.72075	-0.119763	Up	Down	UpDown
ENSMUSG00000033316	Cortex	11.8719	Cortex	-0.119763	Ageing	0.72075	-0.119763	Up	Down	UpDown
ENSMUSG00000029348	Cortex	6.46243	Cortex	0.846881	Development	0.846881	0.479051	Up	Up	UpUp
ENSMUSG00000029348	Cortex	6.46243	Cortex	0.479051	Ageing	0.846881	0.479051	Up	Up	UpUp
ENSMUSG00000042216	Cortex	5.10135	Cortex	0.991031	Development	0.991031	-0.598813	Up	Down	UpDown
ENSMUSG00000042216	Cortex	5.10135	Cortex	-0.598813	Ageing	0.991031	-0.598813	Up	Down	UpDown
ENSMUSG00000058153	Cortex	25.7555	Cortex	-0.252262	Development	-0.252262	-0.826362	Down	Down	DownDown
ENSMUSG00000058153	Cortex	25.7555	Cortex	-0.826362	Ageing	-0.252262	-0.826362	Down	Down	DownDown
ENSMUSG00000042078	Cortex	19.2387	Cortex	0.648675	Development	0.648675	0.0598813	Up	Up	UpUp
ENSMUSG00000042078	Cortex	19.2387	Cortex	0.0598813	Ageing	0.648675	0.0598813	Up	Up	UpUp
ENSMUSG00000072694	Cortex	7.07514	Cortex	0.954994	Development	0.954994	-0.0718576	Up	Down	UpDown
ENSMUSG00000072694	Cortex	7.07514	Cortex	-0.0718576	Ageing	0.954994	-0.0718576	Up	Down	UpDown
ENSMUSG00000029559	Cortex	6.8731	Cortex	0.522544	Development	0.522544	0.455098	Up	Up	UpUp
ENSMUSG00000029559	Cortex	6.8731	Cortex	0.455098	Ageing	0.522544	0.455098	Up	Up	UpUp
ENSMUSG00000029544	Cortex	5.98957	Cortex	0.738769	Development	0.738769	0.347312	Up	Up	UpUp
ENSMUSG00000029544	Cortex	5.98957	Cortex	0.347312	Ageing	0.738769	0.347312	Up	Up	UpUp
ENSMUSG00000041609	Cortex	8.75816	Cortex	0.14415	Development	0.14415	0.347312	Up	Up	UpUp
ENSMUSG00000041609	Cortex	8.75816	Cortex	0.347312	Ageing	0.14415	0.347312	Up	Up	UpUp
ENSMUSG00000061578	Cortex	9.209	Cortex	0.666694	Development	0.666694	0.119763	Up	Up	UpUp
ENSMUSG00000061578	Cortex	9.209	Cortex	0.119763	Ageing	0.666694	0.119763	Up	Up	UpUp
ENSMUSG00000029364	Cortex	7.49656	Cortex	-0.666694	Development	-0.666694	0.060241	Down	Up	DownUp
ENSMUSG00000029364	Cortex	7.49656	Cortex	0.060241	Ageing	-0.666694	0.060241	Down	Up	DownUp
ENSMUSG00000046607	Cortex	7.1828	Cortex	0.954994	Development	0.954994	-0.670671	Up	Down	UpDown
ENSMUSG00000046607	Cortex	7.1828	Cortex	-0.670671	Ageing	0.954994	-0.670671	Up	Down	UpDown
ENSMUSG00000032850	Cortex	10.3525	Cortex	0.0540562	Development	0.0540562	-0.0359288	Up	Down	UpDown
ENSMUSG00000032850	Cortex	10.3525	Cortex	-0.0359288	Ageing	0.0540562	-0.0359288	Up	Down	UpDown
ENSMUSG00000029602	Cortex	4.84179	Cortex	0.630656	Development	0.630656	0.28743	Up	Up	UpUp
ENSMUSG00000029602	Cortex	4.84179	Cortex	0.28743	Ageing	0.630656	0.28743	Up	Up	UpUp
ENSMUSG00000029603	Cortex	9.2867	Cortex	-0.738769	Development	-0.738769	-0.347312	Down	Down	DownDown
ENSMUSG00000029603	Cortex	9.2867	Cortex	-0.347312	Ageing	-0.738769	-0.347312	Down	Down	DownDown
ENSMUSG00000029608	Cortex	14.0558	Cortex	0.774806	Development	0.774806	0.192771	Up	Up	UpUp
ENSMUSG00000029608	Cortex	14.0558	Cortex	0.192771	Ageing	0.774806	0.192771	Up	Up	UpUp
ENSMUSG00000042744	Cortex	7.07525	Cortex	-0.8649	Development	-0.8649	-0.682647	Down	Down	DownDown
ENSMUSG00000042744	Cortex	7.07525	Cortex	-0.682647	Ageing	-0.8649	-0.682647	Down	Down	DownDown
ENSMUSG00000042605	Cortex	4.55589	Cortex	-0.954994	Development	-0.954994	-0.0838338	Down	Down	DownDown
ENSMUSG00000042605	Cortex	4.55589	Cortex	-0.0838338	Ageing	-0.954994	-0.0838338	Down	Down	DownDown
ENSMUSG00000029462	Cortex	4.58017	Cortex	-0.468487	Development	-0.468487	-0.38324	Down	Down	DownDown
ENSMUSG00000029462	Cortex	4.58017	Cortex	-0.38324	Ageing	-0.468487	-0.38324	Down	Down	DownDown
ENSMUSG00000029463	Cortex	5.92246	Cortex	0.900937	Development	0.900937	0.503003	Up	Up	UpUp
ENSMUSG00000029463	Cortex	5.92246	Cortex	0.503003	Ageing	0.900937	0.503003	Up	Up	UpUp
ENSMUSG00000029471	Cortex	8.48768	Cortex	0.630656	Development	0.630656	-0.119763	Up	Down	UpDown
ENSMUSG00000029471	Cortex	8.48768	Cortex	-0.119763	Ageing	0.630656	-0.119763	Up	Down	UpDown
ENSMUSG00000029438	Cortex	5.35273	Cortex	-0.991031	Development	-0.991031	0.143715	Down	Up	DownUp
ENSMUSG00000029438	Cortex	5.35273	Cortex	0.143715	Ageing	-0.991031	0.143715	Down	Up	DownUp
ENSMUSG00000029449	Cortex	5.00363	Cortex	0.486506	Development	0.486506	0.311383	Up	Up	UpUp
ENSMUSG00000029449	Cortex	5.00363	Cortex	0.311383	Ageing	0.486506	0.311383	Up	Up	UpUp
ENSMUSG00000070498	Cortex	10.5867	Cortex	0.684712	Development	0.684712	-0.203596	Up	Down	UpDown
ENSMUSG00000070498	Cortex	10.5867	Cortex	-0.203596	Ageing	0.684712	-0.203596	Up	Down	UpDown
ENSMUSG00000029420	Cortex	12.9816	Cortex	0.792825	Development	0.792825	-0.610789	Up	Down	UpDown
ENSMUSG00000029420	Cortex	12.9816	Cortex	-0.610789	Ageing	0.792825	-0.610789	Up	Down	UpDown
ENSMUSG00000029436	Cortex	10.6221	Cortex	0.774806	Development	0.774806	-0.0119763	Up	Down	UpDown
ENSMUSG00000029436	Cortex	10.6221	Cortex	-0.0119763	Ageing	0.774806	-0.0119763	Up	Down	UpDown
ENSMUSG00000060371	Cortex	4.71228	Cortex	0.108112	Development	0.108112	-0.407193	Up	Down	UpDown
ENSMUSG00000060371	Cortex	4.71228	Cortex	-0.407193	Ageing	0.108112	-0.407193	Up	Down	UpDown
ENSMUSG00000029673	Cortex	5.3763	Cortex	-0.666694	Development	-0.666694	-0.263478	Down	Down	DownDown
ENSMUSG00000029673	Cortex	5.3763	Cortex	-0.263478	Ageing	-0.666694	-0.263478	Down	Down	DownDown
ENSMUSG00000043614	Cortex	5.99849	Cortex	-0.900937	Development	-0.900937	0.503003	Down	Up	DownUp
ENSMUSG00000043614	Cortex	5.99849	Cortex	0.503003	Ageing	-0.900937	0.503003	Down	Up	DownUp
ENSMUSG00000007207	Cortex	8.278	Cortex	0.126131	Development	0.126131	-0.0958101	Up	Down	UpDown
ENSMUSG00000007207	Cortex	8.278	Cortex	-0.0958101	Ageing	0.126131	-0.0958101	Up	Down	UpDown
ENSMUSG00000039860	Cortex	18.1944	Cortex	0.936975	Development	0.936975	0.0359288	Up	Up	UpUp
ENSMUSG00000039860	Cortex	18.1944	Cortex	0.0359288	Ageing	0.936975	0.0359288	Up	Up	UpUp
ENSMUSG00000051391	Cortex	7.66251	Cortex	-0.666694	Development	-0.666694	-0.63253	Down	Down	DownDown
ENSMUSG00000051391	Cortex	7.66251	Cortex	-0.63253	Ageing	-0.666694	-0.63253	Down	Down	DownDown
ENSMUSG00000037428	Cortex	7.02979	Cortex	0.991031	Development	0.991031	0.119763	Up	Up	UpUp
ENSMUSG00000037428	Cortex	7.02979	Cortex	0.119763	Ageing	0.991031	0.119763	Up	Up	UpUp
ENSMUSG00000045348	Cortex	8.96704	Cortex	-0.882919	Development	-0.882919	0.562884	Down	Up	DownUp
ENSMUSG00000045348	Cortex	8.96704	Cortex	0.562884	Ageing	-0.882919	0.562884	Down	Up	DownUp
ENSMUSG00000056413	Cortex	11.9406	Cortex	0.180187	Development	0.180187	0.0119763	Up	Up	UpUp
ENSMUSG00000056413	Cortex	11.9406	Cortex	0.0119763	Ageing	0.180187	0.0119763	Up	Up	UpUp
ENSMUSG00000025855	Cortex	11.3626	Cortex	0.882919	Development	0.882919	-0.060241	Up	Down	UpDown
ENSMUSG00000025855	Cortex	11.3626	Cortex	-0.060241	Ageing	0.882919	-0.060241	Up	Down	UpDown
ENSMUSG00000050822	Cortex	4.53006	Cortex	-0.954994	Development	-0.954994	-0.682647	Down	Down	DownDown
ENSMUSG00000050822	Cortex	4.53006	Cortex	-0.682647	Ageing	-0.954994	-0.682647	Down	Down	DownDown
ENSMUSG00000066640	Cortex	4.77933	Cortex	-0.5766	Development	-0.5766	-0.359288	Down	Down	DownDown
ENSMUSG00000066640	Cortex	4.77933	Cortex	-0.359288	Ageing	-0.5766	-0.359288	Down	Down	DownDown
ENSMUSG00000093910	Cortex	6.60291	Cortex	-0.414431	Development	-0.414431	-0.227549	Down	Down	DownDown
ENSMUSG00000093910	Cortex	6.60291	Cortex	-0.227549	Ageing	-0.414431	-0.227549	Down	Down	DownDown
ENSMUSG00000046658	Cortex	6.22204	Cortex	-0.936975	Development	-0.936975	0.419169	Down	Up	DownUp
ENSMUSG00000046658	Cortex	6.22204	Cortex	0.419169	Ageing	-0.936975	0.419169	Down	Up	DownUp
ENSMUSG00000059991	Cortex	4.6252	Cortex	0.882919	Development	0.882919	-0.783133	Up	Down	UpDown
ENSMUSG00000059991	Cortex	4.6252	Cortex	-0.783133	Ageing	0.882919	-0.783133	Up	Down	UpDown
ENSMUSG00000043388	Cortex	25.1773	Cortex	0.162169	Development	0.162169	-0.347312	Up	Down	UpDown
ENSMUSG00000043388	Cortex	25.1773	Cortex	-0.347312	Ageing	0.162169	-0.347312	Up	Down	UpDown
ENSMUSG00000029636	Cortex	8.4295	Cortex	0.918956	Development	0.918956	0.0718576	Up	Up	UpUp
ENSMUSG00000029636	Cortex	8.4295	Cortex	0.0718576	Ageing	0.918956	0.0718576	Up	Up	UpUp
ENSMUSG00000029651	Cortex	5.54662	Cortex	-0.342356	Development	-0.342356	-0.179644	Down	Down	DownDown
ENSMUSG00000029651	Cortex	5.54662	Cortex	-0.179644	Ageing	-0.342356	-0.179644	Down	Down	DownDown
ENSMUSG00000041298	Cortex	6.78547	Cortex	0.756787	Development	0.756787	-0.0718576	Up	Down	UpDown
ENSMUSG00000041298	Cortex	6.78547	Cortex	-0.0718576	Ageing	0.756787	-0.0718576	Up	Down	UpDown
ENSMUSG00000029757	Cortex	8.91148	Cortex	-0.882919	Development	-0.882919	-0.359288	Down	Down	DownDown
ENSMUSG00000029757	Cortex	8.91148	Cortex	-0.359288	Ageing	-0.882919	-0.359288	Down	Down	DownDown
ENSMUSG00000032625	Cortex	4.50237	Cortex	-0.846881	Development	-0.846881	-0.503003	Down	Down	DownDown
ENSMUSG00000032625	Cortex	4.50237	Cortex	-0.503003	Ageing	-0.846881	-0.503003	Down	Down	DownDown
ENSMUSG00000048216	Cortex	9.76468	Cortex	-0.991031	Development	-0.991031	-0.766481	Down	Down	DownDown
ENSMUSG00000048216	Cortex	9.76468	Cortex	-0.766481	Ageing	-0.991031	-0.766481	Down	Down	DownDown
ENSMUSG00000060882	Cortex	19.0993	Cortex	0.810844	Development	0.810844	-0.443122	Up	Down	UpDown
ENSMUSG00000060882	Cortex	19.0993	Cortex	-0.443122	Ageing	0.810844	-0.443122	Up	Down	UpDown
ENSMUSG00000000416	Cortex	7.67616	Cortex	0.882919	Development	0.882919	-0.455098	Up	Down	UpDown
ENSMUSG00000000416	Cortex	7.67616	Cortex	-0.455098	Ageing	0.882919	-0.455098	Up	Down	UpDown
ENSMUSG00000048022	Cortex	6.77496	Cortex	0.738769	Development	0.738769	0.766481	Up	Up	UpUp
ENSMUSG00000048022	Cortex	6.77496	Cortex	0.766481	Ageing	0.738769	0.766481	Up	Up	UpUp
ENSMUSG00000068748	Cortex	8.02693	Cortex	-0.846881	Development	-0.846881	-0.514979	Down	Down	DownDown
ENSMUSG00000068748	Cortex	8.02693	Cortex	-0.514979	Ageing	-0.846881	-0.514979	Down	Down	DownDown
ENSMUSG00000049939	Cortex	12.8535	Cortex	0.666694	Development	0.666694	0.0359288	Up	Up	UpUp
ENSMUSG00000049939	Cortex	12.8535	Cortex	0.0359288	Ageing	0.666694	0.0359288	Up	Up	UpUp
ENSMUSG00000029765	Cortex	5.51512	Cortex	-0.991031	Development	-0.991031	-0.371264	Down	Down	DownDown
ENSMUSG00000029765	Cortex	5.51512	Cortex	-0.371264	Ageing	-0.991031	-0.371264	Down	Down	DownDown
ENSMUSG00000079598	Cortex	12.6158	Cortex	0.180187	Development	0.180187	0.0838338	Up	Up	UpUp
ENSMUSG00000079598	Cortex	12.6158	Cortex	0.0838338	Ageing	0.180187	0.0838338	Up	Up	UpUp
ENSMUSG00000063455	Cortex	5.00893	Cortex	-0.882919	Development	-0.882919	-0.706599	Down	Down	DownDown
ENSMUSG00000063455	Cortex	5.00893	Cortex	-0.706599	Ageing	-0.882919	-0.706599	Down	Down	DownDown
ENSMUSG00000057716	Cortex	16.2424	Cortex	-0.180187	Development	-0.180187	-0.419169	Down	Down	DownDown
ENSMUSG00000057716	Cortex	16.2424	Cortex	-0.419169	Ageing	-0.180187	-0.419169	Down	Down	DownDown
ENSMUSG00000029916	Cortex	4.62498	Cortex	-0.72075	Development	-0.72075	-0.0838338	Down	Down	DownDown
ENSMUSG00000029916	Cortex	4.62498	Cortex	-0.0838338	Ageing	-0.72075	-0.0838338	Down	Down	DownDown
ENSMUSG00000029861	Cortex	18.6237	Cortex	0.630656	Development	0.630656	-0.239525	Up	Down	UpDown
ENSMUSG00000029861	Cortex	18.6237	Cortex	-0.239525	Ageing	0.630656	-0.239525	Up	Down	UpDown
ENSMUSG00000039419	Cortex	6.31955	Cortex	0.324337	Development	0.324337	-0.467074	Up	Down	UpDown
ENSMUSG00000039419	Cortex	6.31955	Cortex	-0.467074	Ageing	0.324337	-0.467074	Up	Down	UpDown
ENSMUSG00000053297	Cortex	8.50096	Cortex	0.882919	Development	0.882919	0.718576	Up	Up	UpUp
ENSMUSG00000053297	Cortex	8.50096	Cortex	0.718576	Ageing	0.882919	0.718576	Up	Up	UpUp
ENSMUSG00000039347	Cortex	4.45992	Cortex	0.630656	Development	0.630656	-0.155691	Up	Down	UpDown
ENSMUSG00000039347	Cortex	4.45992	Cortex	-0.155691	Ageing	0.630656	-0.155691	Up	Down	UpDown
ENSMUSG00000029819	Cortex	12.3782	Cortex	0.126131	Development	0.126131	0.0359288	Up	Up	UpUp
ENSMUSG00000029819	Cortex	12.3782	Cortex	0.0359288	Ageing	0.126131	0.0359288	Up	Up	UpUp
ENSMUSG00000063568	Cortex	5.08346	Cortex	-0.792825	Development	-0.792825	-0.706599	Down	Down	DownDown
ENSMUSG00000063568	Cortex	5.08346	Cortex	-0.706599	Ageing	-0.792825	-0.706599	Down	Down	DownDown
ENSMUSG00000019124	Cortex	6.64373	Cortex	-0.666694	Development	-0.666694	-0.682647	Down	Down	DownDown
ENSMUSG00000019124	Cortex	6.64373	Cortex	-0.682647	Ageing	-0.666694	-0.682647	Down	Down	DownDown
ENSMUSG00000029778	Cortex	12.0752	Cortex	-0.198206	Development	-0.198206	-0.203596	Down	Down	DownDown
ENSMUSG00000029778	Cortex	12.0752	Cortex	-0.203596	Ageing	-0.198206	-0.203596	Down	Down	DownDown
ENSMUSG00000037984	Cortex	8.31409	Cortex	-0.954994	Development	-0.954994	-0.143715	Down	Down	DownDown
ENSMUSG00000037984	Cortex	8.31409	Cortex	-0.143715	Ageing	-0.954994	-0.143715	Down	Down	DownDown
ENSMUSG00000062190	Cortex	7.19016	Cortex	-0.342356	Development	-0.342356	-0.622766	Down	Down	DownDown
ENSMUSG00000062190	Cortex	7.19016	Cortex	-0.622766	Ageing	-0.342356	-0.622766	Down	Down	DownDown
ENSMUSG00000055430	Cortex	7.46658	Cortex	0.991031	Development	0.991031	0.0958101	Up	Up	UpUp
ENSMUSG00000055430	Cortex	7.46658	Cortex	0.0958101	Ageing	0.991031	0.0958101	Up	Up	UpUp
ENSMUSG00000030043	Cortex	4.41297	Cortex	-0.0180187	Development	-0.0180187	-0.107786	Down	Down	DownDown
ENSMUSG00000030043	Cortex	4.41297	Cortex	-0.107786	Ageing	-0.0180187	-0.107786	Down	Down	DownDown
ENSMUSG00000063063	Cortex	25.5332	Cortex	-0.991031	Development	-0.991031	0.0359288	Down	Up	DownUp
ENSMUSG00000063063	Cortex	25.5332	Cortex	0.0359288	Ageing	-0.991031	0.0359288	Down	Up	DownUp
ENSMUSG00000060780	Cortex	25.1471	Cortex	-0.198206	Development	-0.198206	-0.514979	Down	Down	DownDown
ENSMUSG00000060780	Cortex	25.1471	Cortex	-0.514979	Ageing	-0.198206	-0.514979	Down	Down	DownDown
ENSMUSG00000047013	Cortex	30.5753	Cortex	0.522544	Development	0.522544	-0.107786	Up	Down	UpDown
ENSMUSG00000047013	Cortex	30.5753	Cortex	-0.107786	Ageing	0.522544	-0.107786	Up	Down	UpDown
ENSMUSG00000057230	Cortex	6.54931	Cortex	0.738769	Development	0.738769	-0.658694	Up	Down	UpDown
ENSMUSG00000057230	Cortex	6.54931	Cortex	-0.658694	Ageing	0.738769	-0.658694	Up	Down	UpDown
ENSMUSG00000107539	Cortex	4.89007	Cortex	-0.270281	Development	-0.270281	-0.658694	Down	Down	DownDown
ENSMUSG00000107539	Cortex	4.89007	Cortex	-0.658694	Ageing	-0.270281	-0.658694	Down	Down	DownDown
ENSMUSG00000030086	Cortex	6.42751	Cortex	-0.162169	Development	-0.162169	0.0119763	Down	Up	DownUp
ENSMUSG00000030086	Cortex	6.42751	Cortex	0.0119763	Ageing	-0.162169	0.0119763	Down	Up	DownUp
ENSMUSG00000072875	Cortex	4.59683	Cortex	-0.828862	Development	-0.828862	0.443122	Down	Up	DownUp
ENSMUSG00000072875	Cortex	4.59683	Cortex	0.443122	Ageing	-0.828862	0.443122	Down	Up	DownUp
ENSMUSG00000049112	Cortex	5.65785	Cortex	0.522544	Development	0.522544	-0.562884	Up	Down	UpDown
ENSMUSG00000049112	Cortex	5.65785	Cortex	-0.562884	Ageing	0.522544	-0.562884	Up	Down	UpDown
ENSMUSG00000030077	Cortex	6.42166	Cortex	-0.936975	Development	-0.936975	-0.634742	Down	Down	DownDown
ENSMUSG00000030077	Cortex	6.42166	Cortex	-0.634742	Ageing	-0.936975	-0.634742	Down	Down	DownDown
ENSMUSG00000042873	Cortex	24.1324	Cortex	-0.504525	Development	-0.504525	-0.0598813	Down	Down	DownDown
ENSMUSG00000042873	Cortex	24.1324	Cortex	-0.0598813	Ageing	-0.504525	-0.0598813	Down	Down	DownDown
ENSMUSG00000030257	Cortex	10.8281	Cortex	-0.846881	Development	-0.846881	-0.706599	Down	Down	DownDown
ENSMUSG00000030257	Cortex	10.8281	Cortex	-0.706599	Ageing	-0.846881	-0.706599	Down	Down	DownDown
ENSMUSG00000045009	Cortex	6.57321	Cortex	0.882919	Development	0.882919	0.359288	Up	Up	UpUp
ENSMUSG00000045009	Cortex	6.57321	Cortex	0.359288	Ageing	0.882919	0.359288	Up	Up	UpUp
ENSMUSG00000030307	Cortex	17.5095	Cortex	0.162169	Development	0.162169	-0.251502	Up	Down	UpDown
ENSMUSG00000030307	Cortex	17.5095	Cortex	-0.251502	Ageing	0.162169	-0.251502	Up	Down	UpDown
ENSMUSG00000030302	Cortex	6.33072	Cortex	0.846881	Development	0.846881	0.155691	Up	Up	UpUp
ENSMUSG00000030302	Cortex	6.33072	Cortex	0.155691	Ageing	0.846881	0.155691	Up	Up	UpUp
ENSMUSG00000030310	Cortex	16.5691	Cortex	0.846881	Development	0.846881	-0.259036	Up	Down	UpDown
ENSMUSG00000030310	Cortex	16.5691	Cortex	-0.259036	Ageing	0.846881	-0.259036	Up	Down	UpDown
ENSMUSG00000009394	Cortex	7.29889	Cortex	0.738769	Development	0.738769	-0.634742	Up	Down	UpDown
ENSMUSG00000009394	Cortex	7.29889	Cortex	-0.634742	Ageing	0.738769	-0.634742	Up	Down	UpDown
ENSMUSG00000042097	Cortex	7.73821	Cortex	0.630656	Development	0.630656	0.143715	Up	Up	UpUp
ENSMUSG00000042097	Cortex	7.73821	Cortex	0.143715	Ageing	0.630656	0.143715	Up	Up	UpUp
ENSMUSG00000030145	Cortex	4.85956	Cortex	-0.0900937	Development	-0.0900937	-0.538932	Down	Down	DownDown
ENSMUSG00000030145	Cortex	4.85956	Cortex	-0.538932	Ageing	-0.0900937	-0.538932	Down	Down	DownDown
ENSMUSG00000094626	Cortex	7.13819	Cortex	0.738769	Development	0.738769	0.562884	Up	Up	UpUp
ENSMUSG00000094626	Cortex	7.13819	Cortex	0.562884	Ageing	0.738769	0.562884	Up	Up	UpUp
ENSMUSG00000004902	Cortex	7.13859	Cortex	0.738769	Development	0.738769	-0.251502	Up	Down	UpDown
ENSMUSG00000004902	Cortex	7.13859	Cortex	-0.251502	Ageing	0.738769	-0.251502	Up	Down	UpDown
ENSMUSG00000040797	Cortex	6.76057	Cortex	0.954994	Development	0.954994	-0.203596	Up	Down	UpDown
ENSMUSG00000040797	Cortex	6.76057	Cortex	-0.203596	Ageing	0.954994	-0.203596	Up	Down	UpDown
ENSMUSG00000040649	Cortex	5.72859	Cortex	-0.936975	Development	-0.936975	-0.730552	Down	Down	DownDown
ENSMUSG00000040649	Cortex	5.72859	Cortex	-0.730552	Ageing	-0.936975	-0.730552	Down	Down	DownDown
ENSMUSG00000030327	Cortex	4.62184	Cortex	0.936975	Development	0.936975	-0.922172	Up	Down	UpDown
ENSMUSG00000030327	Cortex	4.62184	Cortex	-0.922172	Ageing	0.936975	-0.922172	Up	Down	UpDown
ENSMUSG00000008153	Cortex	5.45025	Cortex	0.882919	Development	0.882919	-0.0718576	Up	Down	UpDown
ENSMUSG00000008153	Cortex	5.45025	Cortex	-0.0718576	Ageing	0.882919	-0.0718576	Up	Down	UpDown
ENSMUSG00000004267	Cortex	7.09383	Cortex	0.991031	Development	0.991031	-0.395217	Up	Down	UpDown
ENSMUSG00000004267	Cortex	7.09383	Cortex	-0.395217	Ageing	0.991031	-0.395217	Up	Down	UpDown
ENSMUSG00000038429	Cortex	5.15923	Cortex	-0.2883	Development	-0.2883	0.706599	Down	Up	DownUp
ENSMUSG00000038429	Cortex	5.15923	Cortex	0.706599	Ageing	-0.2883	0.706599	Down	Up	DownUp
ENSMUSG00000038390	Cortex	10.0442	Cortex	0.882919	Development	0.882919	-0.826362	Up	Down	UpDown
ENSMUSG00000038390	Cortex	10.0442	Cortex	-0.826362	Ageing	0.882919	-0.826362	Up	Down	UpDown
ENSMUSG00000030329	Cortex	8.43123	Cortex	0.991031	Development	0.991031	0.419169	Up	Up	UpUp
ENSMUSG00000030329	Cortex	8.43123	Cortex	0.419169	Ageing	0.991031	0.419169	Up	Up	UpUp
ENSMUSG00000030120	Cortex	5.67927	Cortex	0.882919	Development	0.882919	0.0240964	Up	Up	UpUp
ENSMUSG00000030120	Cortex	5.67927	Cortex	0.0240964	Ageing	0.882919	0.0240964	Up	Up	UpUp
ENSMUSG00000038077	Cortex	4.79111	Cortex	0.630656	Development	0.630656	0.431145	Up	Up	UpUp
ENSMUSG00000038077	Cortex	4.79111	Cortex	0.431145	Ageing	0.630656	0.431145	Up	Up	UpUp
ENSMUSG00000030350	Cortex	6.6047	Cortex	0.522544	Development	0.522544	0.19162	Up	Up	UpUp
ENSMUSG00000030350	Cortex	6.6047	Cortex	0.19162	Ageing	0.522544	0.19162	Up	Up	UpUp
ENSMUSG00000030209	Cortex	26.2633	Cortex	-0.450469	Development	-0.450469	-0.682647	Down	Down	DownDown
ENSMUSG00000030209	Cortex	26.2633	Cortex	-0.682647	Ageing	-0.450469	-0.682647	Down	Down	DownDown
ENSMUSG00000030223	Cortex	5.13983	Cortex	-0.882919	Development	-0.882919	-0.407193	Down	Down	DownDown
ENSMUSG00000030223	Cortex	5.13983	Cortex	-0.407193	Ageing	-0.882919	-0.407193	Down	Down	DownDown
ENSMUSG00000030226	Cortex	20.7676	Cortex	-0.774806	Development	-0.774806	-0.179644	Down	Down	DownDown
ENSMUSG00000030226	Cortex	20.7676	Cortex	-0.179644	Ageing	-0.774806	-0.179644	Down	Down	DownDown
ENSMUSG00000030235	Cortex	17.5551	Cortex	0.378394	Development	0.378394	-0.706599	Up	Down	UpDown
ENSMUSG00000030235	Cortex	17.5551	Cortex	-0.706599	Ageing	0.378394	-0.706599	Up	Down	UpDown
ENSMUSG00000030283	Cortex	19.8579	Cortex	-0.630656	Development	-0.630656	-0.275454	Down	Down	DownDown
ENSMUSG00000030283	Cortex	19.8579	Cortex	-0.275454	Ageing	-0.630656	-0.275454	Down	Down	DownDown
ENSMUSG00000030279	Cortex	5.32683	Cortex	0.666694	Development	0.666694	-0.526956	Up	Down	UpDown
ENSMUSG00000030279	Cortex	5.32683	Cortex	-0.526956	Ageing	0.666694	-0.526956	Up	Down	UpDown
ENSMUSG00000003452	Cortex	8.22743	Cortex	0.342356	Development	0.342356	-0.562884	Up	Down	UpDown
ENSMUSG00000003452	Cortex	8.22743	Cortex	-0.562884	Ageing	0.342356	-0.562884	Up	Down	UpDown
ENSMUSG00000078816	Cortex	6.85473	Cortex	0.630656	Development	0.630656	0.0598813	Up	Up	UpUp
ENSMUSG00000078816	Cortex	6.85473	Cortex	0.0598813	Ageing	0.630656	0.0598813	Up	Up	UpUp
ENSMUSG00000069806	Cortex	5.26902	Cortex	0.702731	Development	0.702731	-0.0479051	Up	Down	UpDown
ENSMUSG00000069806	Cortex	5.26902	Cortex	-0.0479051	Ageing	0.702731	-0.0479051	Up	Down	UpDown
ENSMUSG00000035596	Cortex	4.8638	Cortex	0.991031	Development	0.991031	0.562884	Up	Up	UpUp
ENSMUSG00000035596	Cortex	4.8638	Cortex	0.562884	Ageing	0.991031	0.562884	Up	Up	UpUp
ENSMUSG00000004961	Cortex	7.5999	Cortex	0.918956	Development	0.918956	0.251502	Up	Up	UpUp
ENSMUSG00000004961	Cortex	7.5999	Cortex	0.251502	Ageing	0.918956	0.251502	Up	Up	UpUp
ENSMUSG00000035390	Cortex	9.80942	Cortex	0.846881	Development	0.846881	0.168675	Up	Up	UpUp
ENSMUSG00000035390	Cortex	9.80942	Cortex	0.168675	Ageing	0.846881	0.168675	Up	Up	UpUp
ENSMUSG00000030428	Cortex	7.04708	Cortex	0.738769	Development	0.738769	0.419169	Up	Up	UpUp
ENSMUSG00000030428	Cortex	7.04708	Cortex	0.419169	Ageing	0.738769	0.419169	Up	Up	UpUp
ENSMUSG00000035285	Cortex	4.5826	Cortex	0.991031	Development	0.991031	0.395217	Up	Up	UpUp
ENSMUSG00000035285	Cortex	4.5826	Cortex	0.395217	Ageing	0.991031	0.395217	Up	Up	UpUp
ENSMUSG00000053550	Cortex	18.4823	Cortex	0.540562	Development	0.540562	-0.275454	Up	Down	UpDown
ENSMUSG00000053550	Cortex	18.4823	Cortex	-0.275454	Ageing	0.540562	-0.275454	Up	Down	UpDown
ENSMUSG00000109398	Cortex	8.31187	Cortex	-0.378394	Development	-0.378394	-0.610789	Down	Down	DownDown
ENSMUSG00000109398	Cortex	8.31187	Cortex	-0.610789	Ageing	-0.378394	-0.610789	Down	Down	DownDown
ENSMUSG00000035228	Cortex	6.54599	Cortex	0.360375	Development	0.360375	-0.179644	Up	Down	UpDown
ENSMUSG00000035228	Cortex	6.54599	Cortex	-0.179644	Ageing	0.360375	-0.179644	Up	Down	UpDown
ENSMUSG00000030393	Cortex	5.2206	Cortex	-0.846881	Development	-0.846881	-0.167668	Down	Down	DownDown
ENSMUSG00000030393	Cortex	5.2206	Cortex	-0.167668	Ageing	-0.846881	-0.167668	Down	Down	DownDown
ENSMUSG00000070822	Cortex	5.15697	Cortex	-0.72075	Development	-0.72075	0.19162	Down	Up	DownUp
ENSMUSG00000070822	Cortex	5.15697	Cortex	0.19162	Ageing	-0.72075	0.19162	Down	Up	DownUp
ENSMUSG00000030380	Cortex	8.14763	Cortex	0.882919	Development	0.882919	-0.479051	Up	Down	UpDown
ENSMUSG00000030380	Cortex	8.14763	Cortex	-0.479051	Ageing	0.882919	-0.479051	Up	Down	UpDown
ENSMUSG00000030376	Cortex	10.5462	Cortex	0.666694	Development	0.666694	0.155691	Up	Up	UpUp
ENSMUSG00000030376	Cortex	10.5462	Cortex	0.155691	Ageing	0.666694	0.155691	Up	Up	UpUp
ENSMUSG00000001988	Cortex	10.6804	Cortex	-0.954994	Development	-0.954994	0.263478	Down	Up	DownUp
ENSMUSG00000001988	Cortex	10.6804	Cortex	0.263478	Ageing	-0.954994	0.263478	Down	Up	DownUp
ENSMUSG00000070802	Cortex	4.77777	Cortex	0.954994	Development	0.954994	-0.167668	Up	Down	UpDown
ENSMUSG00000070802	Cortex	4.77777	Cortex	-0.167668	Ageing	0.954994	-0.167668	Up	Down	UpDown
ENSMUSG00000108348	Cortex	24.1605	Cortex	0.666694	Development	0.666694	-0.562884	Up	Down	UpDown
ENSMUSG00000108348	Cortex	24.1605	Cortex	-0.562884	Ageing	0.666694	-0.562884	Up	Down	UpDown
ENSMUSG00000019370	Cortex	5.33695	Cortex	0.6	Development	0.6	0.109093	Up	Up	UpUp
ENSMUSG00000019370	Cortex	5.33695	Cortex	0.109093	Ageing	0.6	0.109093	Up	Up	UpUp
ENSMUSG00000030411	Cortex	7.29549	Cortex	-0.991031	Development	-0.991031	0.0838338	Down	Up	DownUp
ENSMUSG00000030411	Cortex	7.29549	Cortex	0.0838338	Ageing	-0.991031	0.0838338	Down	Up	DownUp
ENSMUSG00000030410	Cortex	5.97008	Cortex	-0.756787	Development	-0.756787	-0.167668	Down	Down	DownDown
ENSMUSG00000030410	Cortex	5.97008	Cortex	-0.167668	Ageing	-0.756787	-0.167668	Down	Down	DownDown
ENSMUSG00000064264	Cortex	4.72728	Cortex	-0.846881	Development	-0.846881	0.562884	Down	Up	DownUp
ENSMUSG00000064264	Cortex	4.72728	Cortex	0.562884	Ageing	-0.846881	0.562884	Down	Up	DownUp
ENSMUSG00000054793	Cortex	6.19381	Cortex	-0.991031	Development	-0.991031	0.455098	Down	Up	DownUp
ENSMUSG00000054793	Cortex	6.19381	Cortex	0.455098	Ageing	-0.991031	0.455098	Down	Up	DownUp
ENSMUSG00000041037	Cortex	5.72218	Cortex	-0.882919	Development	-0.882919	-0.179644	Down	Down	DownDown
ENSMUSG00000041037	Cortex	5.72218	Cortex	-0.179644	Ageing	-0.882919	-0.179644	Down	Down	DownDown
ENSMUSG00000066721	Cortex	7.18381	Cortex	-0.846881	Development	-0.846881	0.682647	Down	Up	DownUp
ENSMUSG00000066721	Cortex	7.18381	Cortex	0.682647	Ageing	-0.846881	0.682647	Down	Up	DownUp
ENSMUSG00000003378	Cortex	7.4224	Cortex	0.828862	Development	0.828862	-0.0479051	Up	Down	UpDown
ENSMUSG00000003378	Cortex	7.4224	Cortex	-0.0479051	Ageing	0.828862	-0.0479051	Up	Down	UpDown
ENSMUSG00000057177	Cortex	8.6764	Cortex	-0.666694	Development	-0.666694	0.503003	Down	Up	DownUp
ENSMUSG00000057177	Cortex	8.6764	Cortex	0.503003	Ageing	-0.666694	0.503003	Down	Up	DownUp
ENSMUSG00000040907	Cortex	14.631	Cortex	0.882919	Development	0.882919	-0.179644	Up	Down	UpDown
ENSMUSG00000040907	Cortex	14.631	Cortex	-0.179644	Ageing	0.882919	-0.179644	Up	Down	UpDown
ENSMUSG00000061702	Cortex	4.72186	Cortex	0.882919	Development	0.882919	-0.107786	Up	Down	UpDown
ENSMUSG00000061702	Cortex	4.72186	Cortex	-0.107786	Ageing	0.882919	-0.107786	Up	Down	UpDown
ENSMUSG00000011751	Cortex	11.4778	Cortex	0.936975	Development	0.936975	0.574861	Up	Up	UpUp
ENSMUSG00000011751	Cortex	11.4778	Cortex	0.574861	Ageing	0.936975	0.574861	Up	Up	UpUp
ENSMUSG00000007944	Cortex	14.4588	Cortex	0.666694	Development	0.666694	0.19162	Up	Up	UpUp
ENSMUSG00000007944	Cortex	14.4588	Cortex	0.19162	Ageing	0.666694	0.19162	Up	Up	UpUp
ENSMUSG00000040390	Cortex	5.58566	Cortex	0.630656	Development	0.630656	0.622766	Up	Up	UpUp
ENSMUSG00000040390	Cortex	5.58566	Cortex	0.622766	Ageing	0.630656	0.622766	Up	Up	UpUp
ENSMUSG00000070705	Cortex	5.21011	Cortex	-0.450469	Development	-0.450469	0.179644	Down	Up	DownUp
ENSMUSG00000070705	Cortex	5.21011	Cortex	0.179644	Ageing	-0.450469	0.179644	Down	Up	DownUp
ENSMUSG00000037463	Cortex	4.51231	Cortex	0.666694	Development	0.666694	0.550908	Up	Up	UpUp
ENSMUSG00000037463	Cortex	4.51231	Cortex	0.550908	Ageing	0.666694	0.550908	Up	Up	UpUp
ENSMUSG00000030600	Cortex	7.33055	Cortex	-0.882919	Development	-0.882919	0.239525	Down	Up	DownUp
ENSMUSG00000030600	Cortex	7.33055	Cortex	0.239525	Ageing	-0.882919	0.239525	Down	Up	DownUp
ENSMUSG00000037239	Cortex	10.809	Cortex	0.900937	Development	0.900937	-0.718576	Up	Down	UpDown
ENSMUSG00000037239	Cortex	10.809	Cortex	-0.718576	Ageing	0.900937	-0.718576	Up	Down	UpDown
ENSMUSG00000050855	Cortex	6.21773	Cortex	-0.2883	Development	-0.2883	0.275454	Down	Up	DownUp
ENSMUSG00000050855	Cortex	6.21773	Cortex	0.275454	Ageing	-0.2883	0.275454	Down	Up	DownUp
ENSMUSG00000030584	Cortex	8.63816	Cortex	-0.954994	Development	-0.954994	0.0119763	Down	Up	DownUp
ENSMUSG00000030584	Cortex	8.63816	Cortex	0.0119763	Ageing	-0.954994	0.0119763	Down	Up	DownUp
ENSMUSG00000074220	Cortex	5.00485	Cortex	-0.342356	Development	-0.342356	-0.706599	Down	Down	DownDown
ENSMUSG00000074220	Cortex	5.00485	Cortex	-0.706599	Ageing	-0.342356	-0.706599	Down	Down	DownDown
ENSMUSG00000013921	Cortex	7.25522	Cortex	0.126131	Development	0.126131	-0.491027	Up	Down	UpDown
ENSMUSG00000013921	Cortex	7.25522	Cortex	-0.491027	Ageing	0.126131	-0.491027	Up	Down	UpDown
ENSMUSG00000006651	Cortex	13.943	Cortex	0.991031	Development	0.991031	0.884865	Up	Up	UpUp
ENSMUSG00000006651	Cortex	13.943	Cortex	0.884865	Ageing	0.991031	0.884865	Up	Up	UpUp
ENSMUSG00000036882	Cortex	8.14436	Cortex	-0.828862	Development	-0.828862	0.403614	Down	Up	DownUp
ENSMUSG00000036882	Cortex	8.14436	Cortex	0.403614	Ageing	-0.828862	0.403614	Down	Up	DownUp
ENSMUSG00000036578	Cortex	6.68194	Cortex	0.486506	Development	0.486506	0.467074	Up	Up	UpUp
ENSMUSG00000036578	Cortex	6.68194	Cortex	0.467074	Ageing	0.486506	0.467074	Up	Up	UpUp
ENSMUSG00000043456	Cortex	5.01557	Cortex	-0.126131	Development	-0.126131	0.239525	Down	Up	DownUp
ENSMUSG00000043456	Cortex	5.01557	Cortex	0.239525	Ageing	-0.126131	0.239525	Down	Up	DownUp
ENSMUSG00000039257	Cortex	7.70485	Cortex	0.324337	Development	0.324337	0.227549	Up	Up	UpUp
ENSMUSG00000039257	Cortex	7.70485	Cortex	0.227549	Ageing	0.324337	0.227549	Up	Up	UpUp
ENSMUSG00000013367	Cortex	10.8108	Cortex	-0.846881	Development	-0.846881	0	Down	Down	DownDown
ENSMUSG00000013367	Cortex	10.8108	Cortex	0	Ageing	-0.846881	0	Down	Down	DownDown
ENSMUSG00000047085	Cortex	10.3275	Cortex	-0.828862	Development	-0.828862	0.491027	Down	Up	DownUp
ENSMUSG00000047085	Cortex	10.3275	Cortex	0.491027	Ageing	-0.828862	0.491027	Down	Up	DownUp
ENSMUSG00000038738	Cortex	21.2674	Cortex	0.324337	Development	0.324337	-0.742528	Up	Down	UpDown
ENSMUSG00000038738	Cortex	21.2674	Cortex	-0.742528	Ageing	0.324337	-0.742528	Up	Down	UpDown
ENSMUSG00000030731	Cortex	6.7512	Cortex	0.666694	Development	0.666694	0.503003	Up	Up	UpUp
ENSMUSG00000030731	Cortex	6.7512	Cortex	0.503003	Ageing	0.666694	0.503003	Up	Up	UpUp
ENSMUSG00000060279	Cortex	6.02729	Cortex	0.630656	Development	0.630656	-0.0958101	Up	Down	UpDown
ENSMUSG00000060279	Cortex	6.02729	Cortex	-0.0958101	Ageing	0.630656	-0.0958101	Up	Down	UpDown
ENSMUSG00000070570	Cortex	6.64664	Cortex	0.738769	Development	0.738769	-0.323359	Up	Down	UpDown
ENSMUSG00000070570	Cortex	6.64664	Cortex	-0.323359	Ageing	0.738769	-0.323359	Up	Down	UpDown
ENSMUSG00000003863	Cortex	4.72028	Cortex	0.630656	Development	0.630656	0.431145	Up	Up	UpUp
ENSMUSG00000003863	Cortex	4.72028	Cortex	0.431145	Ageing	0.630656	0.431145	Up	Up	UpUp
ENSMUSG00000003872	Cortex	5.73869	Cortex	0.630656	Development	0.630656	0.311383	Up	Up	UpUp
ENSMUSG00000003872	Cortex	5.73869	Cortex	0.311383	Ageing	0.630656	0.311383	Up	Up	UpUp
ENSMUSG00000003273	Cortex	6.29516	Cortex	0.936975	Development	0.936975	0.550908	Up	Up	UpUp
ENSMUSG00000003273	Cortex	6.29516	Cortex	0.550908	Ageing	0.936975	0.550908	Up	Up	UpUp
ENSMUSG00000062044	Cortex	23.7437	Cortex	-0.396412	Development	-0.396412	0.506024	Down	Up	DownUp
ENSMUSG00000062044	Cortex	23.7437	Cortex	0.506024	Ageing	-0.396412	0.506024	Down	Up	DownUp
ENSMUSG00000002771	Cortex	5.20353	Cortex	-0.594619	Development	-0.594619	-0.514979	Down	Down	DownDown
ENSMUSG00000002771	Cortex	5.20353	Cortex	-0.514979	Ageing	-0.594619	-0.514979	Down	Down	DownDown
ENSMUSG00000030854	Cortex	6.42407	Cortex	-0.0360375	Development	-0.0360375	0.622766	Down	Up	DownUp
ENSMUSG00000030854	Cortex	6.42407	Cortex	0.622766	Ageing	-0.0360375	0.622766	Down	Up	DownUp
ENSMUSG00000055409	Cortex	7.21688	Cortex	0.882919	Development	0.882919	-0.0958101	Up	Down	UpDown
ENSMUSG00000055409	Cortex	7.21688	Cortex	-0.0958101	Ageing	0.882919	-0.0958101	Up	Down	UpDown
ENSMUSG00000063297	Cortex	28.7898	Cortex	0.828862	Development	0.828862	-0.682647	Up	Down	UpDown
ENSMUSG00000063297	Cortex	28.7898	Cortex	-0.682647	Ageing	0.828862	-0.682647	Up	Down	UpDown
ENSMUSG00000033676	Cortex	21.4125	Cortex	0.306319	Development	0.306319	-0.826362	Up	Down	UpDown
ENSMUSG00000033676	Cortex	21.4125	Cortex	-0.826362	Ageing	0.306319	-0.826362	Up	Down	UpDown
ENSMUSG00000033510	Cortex	8.96793	Cortex	0.846881	Development	0.846881	-0.514979	Up	Down	UpDown
ENSMUSG00000033510	Cortex	8.96793	Cortex	-0.514979	Ageing	0.846881	-0.514979	Up	Down	UpDown
ENSMUSG00000102252	Cortex	7.58806	Cortex	0.738769	Development	0.738769	0.156627	Up	Up	UpUp
ENSMUSG00000102252	Cortex	7.58806	Cortex	0.156627	Ageing	0.738769	0.156627	Up	Up	UpUp
ENSMUSG00000102627	Cortex	4.49122	Cortex	0.756787	Development	0.756787	-0.910196	Up	Down	UpDown
ENSMUSG00000102627	Cortex	4.49122	Cortex	-0.910196	Ageing	0.756787	-0.910196	Up	Down	UpDown
ENSMUSG00000030518	Cortex	11.4341	Cortex	0.810844	Development	0.810844	0.0838338	Up	Up	UpUp
ENSMUSG00000030518	Cortex	11.4341	Cortex	0.0838338	Ageing	0.810844	0.0838338	Up	Up	UpUp
ENSMUSG00000030519	Cortex	25.0108	Cortex	-0.414431	Development	-0.414431	0.0598813	Down	Up	DownUp
ENSMUSG00000030519	Cortex	25.0108	Cortex	0.0598813	Ageing	-0.414431	0.0598813	Down	Up	DownUp
ENSMUSG00000053025	Cortex	7.04094	Cortex	0.738769	Development	0.738769	-0.431145	Up	Down	UpDown
ENSMUSG00000053025	Cortex	7.04094	Cortex	-0.431145	Ageing	0.738769	-0.431145	Up	Down	UpDown
ENSMUSG00000059146	Cortex	6.56358	Cortex	0.882919	Development	0.882919	-0.578313	Up	Down	UpDown
ENSMUSG00000059146	Cortex	6.56358	Cortex	-0.578313	Ageing	0.882919	-0.578313	Up	Down	UpDown
ENSMUSG00000062444	Cortex	25.0951	Cortex	-0.540562	Development	-0.540562	0.347312	Down	Up	DownUp
ENSMUSG00000062444	Cortex	25.0951	Cortex	0.347312	Ageing	-0.540562	0.347312	Down	Up	DownUp
ENSMUSG00000030638	Cortex	11.1381	Cortex	-0.2883	Development	-0.2883	0.491027	Down	Up	DownUp
ENSMUSG00000030638	Cortex	11.1381	Cortex	0.491027	Ageing	-0.2883	0.491027	Down	Up	DownUp
ENSMUSG00000025104	Cortex	4.7619	Cortex	-0.954994	Development	-0.954994	-0.526956	Down	Down	DownDown
ENSMUSG00000025104	Cortex	4.7619	Cortex	-0.526956	Ageing	-0.954994	-0.526956	Down	Down	DownDown
ENSMUSG00000015709	Cortex	13.1959	Cortex	-0.774806	Development	-0.774806	0.335335	Down	Up	DownUp
ENSMUSG00000015709	Cortex	13.1959	Cortex	0.335335	Ageing	-0.774806	0.335335	Down	Up	DownUp
ENSMUSG00000049583	Cortex	53.3862	Cortex	-0.0900937	Development	-0.0900937	-0.491027	Down	Down	DownDown
ENSMUSG00000049583	Cortex	53.3862	Cortex	-0.491027	Ageing	-0.0900937	-0.491027	Down	Down	DownDown
ENSMUSG00000052572	Cortex	17.9633	Cortex	-0.360375	Development	-0.360375	-0.80241	Down	Down	DownDown
ENSMUSG00000052572	Cortex	17.9633	Cortex	-0.80241	Ageing	-0.360375	-0.80241	Down	Down	DownDown
ENSMUSG00000035401	Cortex	4.78001	Cortex	0.378394	Development	0.378394	-0.143715	Up	Down	UpDown
ENSMUSG00000035401	Cortex	4.78001	Cortex	-0.143715	Ageing	0.378394	-0.143715	Up	Down	UpDown
ENSMUSG00000030729	Cortex	7.84359	Cortex	0.180187	Development	0.180187	-0.155691	Up	Down	UpDown
ENSMUSG00000030729	Cortex	7.84359	Cortex	-0.155691	Ageing	0.180187	-0.155691	Up	Down	UpDown
ENSMUSG00000030718	Cortex	5.28234	Cortex	0.846881	Development	0.846881	0.119763	Up	Up	UpUp
ENSMUSG00000030718	Cortex	5.28234	Cortex	0.119763	Ageing	0.846881	0.119763	Up	Up	UpUp
ENSMUSG00000030704	Cortex	6.71376	Cortex	0.594619	Development	0.594619	0.251502	Up	Up	UpUp
ENSMUSG00000030704	Cortex	6.71376	Cortex	0.251502	Ageing	0.594619	0.251502	Up	Up	UpUp
ENSMUSG00000029461	Cortex	8.39465	Cortex	-0.954994	Development	-0.954994	-0.826362	Down	Down	DownDown
ENSMUSG00000029461	Cortex	8.39465	Cortex	-0.826362	Ageing	-0.954994	-0.826362	Down	Down	DownDown
ENSMUSG00000031026	Cortex	4.49409	Cortex	0.954994	Development	0.954994	0.38324	Up	Up	UpUp
ENSMUSG00000031026	Cortex	4.49409	Cortex	0.38324	Ageing	0.954994	0.38324	Up	Up	UpUp
ENSMUSG00000031028	Cortex	11.9619	Cortex	-0.936975	Development	-0.936975	-0.371264	Down	Down	DownDown
ENSMUSG00000031028	Cortex	11.9619	Cortex	-0.371264	Ageing	-0.936975	-0.371264	Down	Down	DownDown
ENSMUSG00000048330	Cortex	9.82502	Cortex	0.882919	Development	0.882919	-0.395217	Up	Down	UpDown
ENSMUSG00000048330	Cortex	9.82502	Cortex	-0.395217	Ageing	0.882919	-0.395217	Up	Down	UpDown
ENSMUSG00000034825	Cortex	6.22555	Cortex	0.738769	Development	0.738769	-0.562884	Up	Down	UpDown
ENSMUSG00000034825	Cortex	6.22555	Cortex	-0.562884	Ageing	0.738769	-0.562884	Up	Down	UpDown
ENSMUSG00000038187	Cortex	4.56097	Cortex	-0.0360375	Development	-0.0360375	-0.119763	Down	Down	DownDown
ENSMUSG00000038187	Cortex	4.56097	Cortex	-0.119763	Ageing	-0.0360375	-0.119763	Down	Down	DownDown
ENSMUSG00000030657	Cortex	5.18533	Cortex	0.198206	Development	0.198206	-0.718576	Up	Down	UpDown
ENSMUSG00000030657	Cortex	5.18533	Cortex	-0.718576	Ageing	0.198206	-0.718576	Up	Down	UpDown
ENSMUSG00000058420	Cortex	4.49462	Cortex	0.882919	Development	0.882919	-0.479051	Up	Down	UpDown
ENSMUSG00000058420	Cortex	4.49462	Cortex	-0.479051	Ageing	0.882919	-0.479051	Up	Down	UpDown
ENSMUSG00000066189	Cortex	7.24422	Cortex	0.666694	Development	0.666694	0.155691	Up	Up	UpUp
ENSMUSG00000066189	Cortex	7.24422	Cortex	0.155691	Ageing	0.666694	0.155691	Up	Up	UpUp
ENSMUSG00000052889	Cortex	5.90299	Cortex	0.882919	Development	0.882919	0.0718576	Up	Up	UpUp
ENSMUSG00000052889	Cortex	5.90299	Cortex	0.0718576	Ageing	0.882919	0.0718576	Up	Up	UpUp
ENSMUSG00000030757	Cortex	12.2925	Cortex	-0.882919	Development	-0.882919	-0.167668	Down	Down	DownDown
ENSMUSG00000030757	Cortex	12.2925	Cortex	-0.167668	Ageing	-0.882919	-0.167668	Down	Down	DownDown
ENSMUSG00000046182	Cortex	7.23331	Cortex	0.846881	Development	0.846881	0.323359	Up	Up	UpUp
ENSMUSG00000046182	Cortex	7.23331	Cortex	0.323359	Ageing	0.846881	0.323359	Up	Up	UpUp
ENSMUSG00000052301	Cortex	16.9075	Cortex	-0.540562	Development	-0.540562	-0.311383	Down	Down	DownDown
ENSMUSG00000052301	Cortex	16.9075	Cortex	-0.311383	Ageing	-0.540562	-0.311383	Down	Down	DownDown
ENSMUSG00000030685	Cortex	17.407	Cortex	-0.900937	Development	-0.900937	0.838338	Down	Up	DownUp
ENSMUSG00000030685	Cortex	17.407	Cortex	0.838338	Ageing	-0.900937	0.838338	Down	Up	DownUp
ENSMUSG00000030683	Cortex	11.2928	Cortex	0.991031	Development	0.991031	0.407193	Up	Up	UpUp
ENSMUSG00000030683	Cortex	11.2928	Cortex	0.407193	Ageing	0.991031	0.407193	Up	Up	UpUp
ENSMUSG00000045114	Cortex	11.5324	Cortex	0.846881	Development	0.846881	0.359288	Up	Up	UpUp
ENSMUSG00000045114	Cortex	11.5324	Cortex	0.359288	Ageing	0.846881	0.359288	Up	Up	UpUp
ENSMUSG00000030806	Cortex	11.2064	Cortex	0.738769	Development	0.738769	-0.598813	Up	Down	UpDown
ENSMUSG00000030806	Cortex	11.2064	Cortex	-0.598813	Ageing	0.738769	-0.598813	Up	Down	UpDown
ENSMUSG00000042105	Cortex	4.856	Cortex	-0.738769	Development	-0.738769	0.143715	Down	Up	DownUp
ENSMUSG00000042105	Cortex	4.856	Cortex	0.143715	Ageing	-0.738769	0.143715	Down	Up	DownUp
ENSMUSG00000025475	Cortex	6.05993	Cortex	0.738769	Development	0.738769	0.119763	Up	Up	UpUp
ENSMUSG00000025475	Cortex	6.05993	Cortex	0.119763	Ageing	0.738769	0.119763	Up	Up	UpUp
ENSMUSG00000015981	Cortex	5.76514	Cortex	0.954994	Development	0.954994	0.658694	Up	Up	UpUp
ENSMUSG00000015981	Cortex	5.76514	Cortex	0.658694	Ageing	0.954994	0.658694	Up	Up	UpUp
ENSMUSG00000025478	Cortex	9.18237	Cortex	-0.666694	Development	-0.666694	-0.89822	Down	Down	DownDown
ENSMUSG00000025478	Cortex	9.18237	Cortex	-0.89822	Ageing	-0.666694	-0.89822	Down	Down	DownDown
ENSMUSG00000066129	Cortex	5.74122	Cortex	0.991031	Development	0.991031	0.431145	Up	Up	UpUp
ENSMUSG00000066129	Cortex	5.74122	Cortex	0.431145	Ageing	0.991031	0.431145	Up	Up	UpUp
ENSMUSG00000025468	Cortex	18.8952	Cortex	0.684712	Development	0.684712	-0.253012	Up	Down	UpDown
ENSMUSG00000025468	Cortex	18.8952	Cortex	-0.253012	Ageing	0.684712	-0.253012	Up	Down	UpDown
ENSMUSG00000045733	Cortex	7.77004	Cortex	0.666694	Development	0.666694	-0.155691	Up	Down	UpDown
ENSMUSG00000045733	Cortex	7.77004	Cortex	-0.155691	Ageing	0.666694	-0.155691	Up	Down	UpDown
ENSMUSG00000055629	Cortex	14.8839	Cortex	-0.954994	Development	-0.954994	0.80241	Down	Up	DownUp
ENSMUSG00000055629	Cortex	14.8839	Cortex	0.80241	Ageing	-0.954994	0.80241	Down	Up	DownUp
ENSMUSG00000060314	Cortex	4.71422	Cortex	0.991031	Development	0.991031	-0.251502	Up	Down	UpDown
ENSMUSG00000060314	Cortex	4.71422	Cortex	-0.251502	Ageing	0.991031	-0.251502	Up	Down	UpDown
ENSMUSG00000060240	Cortex	11.635	Cortex	0.666694	Development	0.666694	0.0119763	Up	Up	UpUp
ENSMUSG00000060240	Cortex	11.635	Cortex	0.0119763	Ageing	0.666694	0.0119763	Up	Up	UpUp
ENSMUSG00000053046	Cortex	35.8122	Cortex	-0.450469	Development	-0.450469	0.203596	Down	Up	DownUp
ENSMUSG00000053046	Cortex	35.8122	Cortex	0.203596	Ageing	-0.450469	0.203596	Down	Up	DownUp
ENSMUSG00000037541	Cortex	5.58095	Cortex	0.666694	Development	0.666694	-0.706599	Up	Down	UpDown
ENSMUSG00000037541	Cortex	5.58095	Cortex	-0.706599	Ageing	0.666694	-0.706599	Up	Down	UpDown
ENSMUSG00000048644	Cortex	6.64258	Cortex	0.738769	Development	0.738769	0.253012	Up	Up	UpUp
ENSMUSG00000048644	Cortex	6.64258	Cortex	0.253012	Ageing	0.738769	0.253012	Up	Up	UpUp
ENSMUSG00000064125	Cortex	8.1186	Cortex	-0.991031	Development	-0.991031	0.167668	Down	Up	DownUp
ENSMUSG00000064125	Cortex	8.1186	Cortex	0.167668	Ageing	-0.991031	0.167668	Down	Up	DownUp
ENSMUSG00000011832	Cortex	4.77059	Cortex	-0.991031	Development	-0.991031	0.634742	Down	Up	DownUp
ENSMUSG00000011832	Cortex	4.77059	Cortex	0.634742	Ageing	-0.991031	0.634742	Down	Up	DownUp
ENSMUSG00000039057	Cortex	7.75956	Cortex	-0.991031	Development	-0.991031	-0.203596	Down	Down	DownDown
ENSMUSG00000039057	Cortex	7.75956	Cortex	-0.203596	Ageing	-0.991031	-0.203596	Down	Down	DownDown
ENSMUSG00000038365	Cortex	4.59679	Cortex	-0.0180187	Development	-0.0180187	-0.0598813	Down	Down	DownDown
[truncated: 7,401 more rows]

## Sheet: sdata2
geneid	tissue	ES	spec	rho	period	Development	Ageing	dev	age	rev
ENSMUSG00000025911	Cortex	-0.340396	Liver	0.954994	Development	0.954994	0.479051	Up	Up	UpUp
ENSMUSG00000025911	Cortex	-0.340396	Liver	0.479051	Ageing	0.954994	0.479051	Up	Up	UpUp
ENSMUSG00000099032	Cortex	-0.728534	Liver	-0.342356	Development	-0.342356	-0.0359288	Down	Down	DownDown
ENSMUSG00000099032	Cortex	-0.728534	Liver	-0.0359288	Ageing	-0.342356	-0.0359288	Down	Down	DownDown
ENSMUSG00000025937	Cortex	-1.34346	Liver	0.736364	Development	0.736364	0.311383	Up	Up	UpUp
ENSMUSG00000025937	Cortex	-1.34346	Liver	0.311383	Ageing	0.736364	0.311383	Up	Up	UpUp
ENSMUSG00000043760	Cortex	-0.824002	Liver	0.0360375	Development	0.0360375	-0.754505	Up	Down	UpDown
ENSMUSG00000043760	Cortex	-0.824002	Liver	-0.754505	Ageing	0.0360375	-0.754505	Up	Down	UpDown
ENSMUSG00000025934	Cortex	-1.48986	Liver	0.666694	Development	0.666694	0.299407	Up	Up	UpUp
ENSMUSG00000025934	Cortex	-1.48986	Liver	0.299407	Ageing	0.666694	0.299407	Up	Up	UpUp
ENSMUSG00000026127	Cortex	-0.890468	Liver	-0.774806	Development	-0.774806	0.263478	Down	Up	DownUp
ENSMUSG00000026127	Cortex	-0.890468	Liver	0.263478	Ageing	-0.774806	0.263478	Down	Up	DownUp
ENSMUSG00000048234	Cortex	-1.65696	Liver	0.954994	Development	0.954994	0.0479051	Up	Up	UpUp
ENSMUSG00000048234	Cortex	-1.65696	Liver	0.0479051	Ageing	0.954994	0.0479051	Up	Up	UpUp
ENSMUSG00000025993	Cortex	-1.38459	Liver	-0.810844	Development	-0.810844	-0.311383	Down	Down	DownDown
ENSMUSG00000025993	Cortex	-1.38459	Liver	-0.311383	Ageing	-0.810844	-0.311383	Down	Down	DownDown
ENSMUSG00000041426	Cortex	-1.44439	Liver	0.0180187	Development	0.0180187	0.514979	Up	Up	UpUp
ENSMUSG00000041426	Cortex	-1.44439	Liver	0.514979	Ageing	0.0180187	0.514979	Up	Up	UpUp
ENSMUSG00000025980	Cortex	-0.134014	Liver	-0.954994	Development	-0.954994	-0.790433	Down	Down	DownDown
ENSMUSG00000025980	Cortex	-0.134014	Liver	-0.790433	Ageing	-0.954994	-0.790433	Down	Down	DownDown
ENSMUSG00000026014	Cortex	-0.707094	Liver	-0.504525	Development	-0.504525	-0.503003	Down	Down	DownDown
ENSMUSG00000026014	Cortex	-0.707094	Liver	-0.503003	Ageing	-0.504525	-0.503003	Down	Down	DownDown
ENSMUSG00000025991	Cortex	-0.834287	Liver	-0.522544	Development	-0.522544	-0.0958101	Down	Down	DownDown
ENSMUSG00000025991	Cortex	-0.834287	Liver	-0.0958101	Ageing	-0.522544	-0.0958101	Down	Down	DownDown
ENSMUSG00000026189	Cortex	-1.33658	Liver	-0.342356	Development	-0.342356	0.610789	Down	Up	DownUp
ENSMUSG00000026189	Cortex	-1.33658	Liver	0.610789	Ageing	-0.342356	0.610789	Down	Up	DownUp
ENSMUSG00000026177	Cortex	-1.9685	Liver	0.828862	Development	0.828862	0.634742	Up	Up	UpUp
ENSMUSG00000026177	Cortex	-1.9685	Liver	0.634742	Ageing	0.828862	0.634742	Up	Up	UpUp
ENSMUSG00000045658	Cortex	0.240296	Liver	-0.14415	Development	-0.14415	-0.778457	Down	Down	DownDown
ENSMUSG00000045658	Cortex	0.240296	Liver	-0.778457	Ageing	-0.14415	-0.778457	Down	Down	DownDown
ENSMUSG00000026227	Cortex	0.013753	Liver	-0.5766	Development	-0.5766	0.730552	Down	Up	DownUp
ENSMUSG00000026227	Cortex	0.013753	Liver	0.730552	Ageing	-0.5766	0.730552	Down	Up	DownUp
ENSMUSG00000079429	Cortex	-1.2312	Liver	-0.486506	Development	-0.486506	-0.0718576	Down	Down	DownDown
ENSMUSG00000079429	Cortex	-1.2312	Liver	-0.0718576	Ageing	-0.486506	-0.0718576	Down	Down	DownDown
ENSMUSG00000026295	Cortex	-0.797944	Liver	-0.342356	Development	-0.342356	0.431145	Down	Up	DownUp
ENSMUSG00000026295	Cortex	-0.797944	Liver	0.431145	Ageing	-0.342356	0.431145	Down	Up	DownUp
ENSMUSG00000090175	Cortex	-0.693107	Liver	0.162169	Development	0.162169	-0.299407	Up	Down	UpDown
ENSMUSG00000090175	Cortex	-0.693107	Liver	-0.299407	Ageing	0.162169	-0.299407	Up	Down	UpDown
ENSMUSG00000090145	Cortex	-0.969413	Liver	0.414431	Development	0.414431	-0.634742	Up	Down	UpDown
ENSMUSG00000090145	Cortex	-0.969413	Liver	-0.634742	Ageing	0.414431	-0.634742	Up	Down	UpDown
ENSMUSG00000089960	Cortex	-1.00614	Liver	0.270281	Development	0.270281	-0.419169	Up	Down	UpDown
ENSMUSG00000089960	Cortex	-1.00614	Liver	-0.419169	Ageing	0.270281	-0.419169	Up	Down	UpDown
ENSMUSG00000026304	Cortex	-1.0576	Liver	-0.216225	Development	-0.216225	-0.251502	Down	Down	DownDown
ENSMUSG00000026304	Cortex	-1.0576	Liver	-0.251502	Ageing	-0.216225	-0.251502	Down	Down	DownDown
ENSMUSG00000026307	Cortex	-1.48647	Liver	0.900937	Development	0.900937	0.38324	Up	Up	UpUp
ENSMUSG00000026307	Cortex	-1.48647	Liver	0.38324	Ageing	0.900937	0.38324	Up	Up	UpUp
ENSMUSG00000026270	Cortex	0.46753	Liver	-0.810844	Development	-0.810844	0	Down	Down	DownDown
ENSMUSG00000026270	Cortex	0.46753	Liver	0	Ageing	-0.810844	0	Down	Down	DownDown
ENSMUSG00000026272	Cortex	-0.809928	Liver	-0.360375	Development	-0.360375	0.251502	Down	Up	DownUp
ENSMUSG00000026272	Cortex	-0.809928	Liver	0.251502	Ageing	-0.360375	0.251502	Down	Up	DownUp
ENSMUSG00000026390	Cortex	-1.40129	Liver	-0.0360375	Development	-0.0360375	0.562884	Down	Up	DownUp
ENSMUSG00000026390	Cortex	-1.40129	Liver	0.562884	Ageing	-0.0360375	0.562884	Down	Up	DownUp
ENSMUSG00000026385	Cortex	-0.802967	Liver	-0.581818	Development	-0.581818	-0.0119763	Down	Down	DownDown
ENSMUSG00000026385	Cortex	-0.802967	Liver	-0.0119763	Ageing	-0.581818	-0.0119763	Down	Down	DownDown
ENSMUSG00000026343	Cortex	-1.31175	Liver	0.414431	Development	0.414431	-0.718576	Up	Down	UpDown
ENSMUSG00000026343	Cortex	-1.31175	Liver	-0.718576	Ageing	0.414431	-0.718576	Up	Down	UpDown
ENSMUSG00000026348	Cortex	-0.798153	Liver	0.180187	Development	0.180187	-0.299407	Up	Down	UpDown
ENSMUSG00000026348	Cortex	-0.798153	Liver	-0.299407	Ageing	0.180187	-0.299407	Up	Down	UpDown
ENSMUSG00000026405	Cortex	-0.822814	Liver	-0.558581	Development	-0.558581	-0.359288	Down	Down	DownDown
ENSMUSG00000026405	Cortex	-0.822814	Liver	-0.359288	Ageing	-0.558581	-0.359288	Down	Down	DownDown
ENSMUSG00000042349	Cortex	-2.5158	Liver	0	Development	0	0.263478	Down	Up	DownUp
ENSMUSG00000042349	Cortex	-2.5158	Liver	0.263478	Ageing	0	0.263478	Down	Up	DownUp
ENSMUSG00000042251	Cortex	-0.802463	Liver	0.828862	Development	0.828862	0.371264	Up	Up	UpUp
ENSMUSG00000042251	Cortex	-0.802463	Liver	0.371264	Ageing	0.828862	0.371264	Up	Up	UpUp
ENSMUSG00000026435	Cortex	-2.11466	Liver	0.198206	Development	0.198206	0.0359288	Up	Up	UpUp
ENSMUSG00000026435	Cortex	-2.11466	Liver	0.0359288	Ageing	0.198206	0.0359288	Up	Up	UpUp
ENSMUSG00000070644	Cortex	-0.323836	Liver	0.162169	Development	0.162169	0.335335	Up	Up	UpUp
ENSMUSG00000070644	Cortex	-0.323836	Liver	0.335335	Ageing	0.162169	0.335335	Up	Up	UpUp
ENSMUSG00000103421	Cortex	-0.767416	Liver	-0.0180187	Development	-0.0180187	-0.574861	Down	Down	DownDown
ENSMUSG00000103421	Cortex	-0.767416	Liver	-0.574861	Ageing	-0.0180187	-0.574861	Down	Down	DownDown
ENSMUSG00000098306	Cortex	-0.772287	Liver	0.810844	Development	0.810844	0.419169	Up	Up	UpUp
ENSMUSG00000098306	Cortex	-0.772287	Liver	0.419169	Ageing	0.810844	0.419169	Up	Up	UpUp
ENSMUSG00000026398	Cortex	-0.927051	Liver	-0.846881	Development	-0.846881	-0.323359	Down	Down	DownDown
ENSMUSG00000026398	Cortex	-0.927051	Liver	-0.323359	Ageing	-0.846881	-0.323359	Down	Down	DownDown
ENSMUSG00000026368	Cortex	-0.807773	Liver	0.126131	Development	0.126131	0.431145	Up	Up	UpUp
ENSMUSG00000026368	Cortex	-0.807773	Liver	0.431145	Ageing	0.126131	0.431145	Up	Up	UpUp
ENSMUSG00000033898	Cortex	-0.908488	Liver	-0.846881	Development	-0.846881	0.119763	Down	Up	DownUp
ENSMUSG00000033898	Cortex	-0.908488	Liver	0.119763	Ageing	-0.846881	0.119763	Down	Up	DownUp
ENSMUSG00000070594	Cortex	-0.79883	Liver	0.252262	Development	0.252262	-0.0838338	Up	Down	UpDown
ENSMUSG00000070594	Cortex	-0.79883	Liver	-0.0838338	Ageing	0.252262	-0.0838338	Up	Down	UpDown
ENSMUSG00000026589	Cortex	-1.55314	Liver	0.846881	Development	0.846881	-0.227549	Up	Down	UpDown
ENSMUSG00000026589	Cortex	-1.55314	Liver	-0.227549	Ageing	0.846881	-0.227549	Up	Down	UpDown
ENSMUSG00000026715	Cortex	-0.947406	Liver	-0.378394	Development	-0.378394	0.419169	Down	Up	DownUp
ENSMUSG00000026715	Cortex	-0.947406	Liver	0.419169	Ageing	-0.378394	0.419169	Down	Up	DownUp
ENSMUSG00000026692	Cortex	-1.04243	Liver	-0.612637	Development	-0.612637	-0.143715	Down	Down	DownDown
ENSMUSG00000026692	Cortex	-1.04243	Liver	-0.143715	Ageing	-0.612637	-0.143715	Down	Down	DownDown
ENSMUSG00000040918	Cortex	-0.667577	Liver	0.810844	Development	0.810844	-0.227549	Up	Down	UpDown
ENSMUSG00000040918	Cortex	-0.667577	Liver	-0.227549	Ageing	0.810844	-0.227549	Up	Down	UpDown
ENSMUSG00000026579	Cortex	-0.918893	Liver	0.846881	Development	0.846881	-0.323359	Up	Down	UpDown
ENSMUSG00000026579	Cortex	-0.918893	Liver	-0.323359	Ageing	0.846881	-0.323359	Up	Down	UpDown
ENSMUSG00000026687	Cortex	-1.36595	Liver	-0.684712	Development	-0.684712	0.838338	Down	Up	DownUp
ENSMUSG00000026687	Cortex	-1.36595	Liver	0.838338	Ageing	-0.684712	0.838338	Down	Up	DownUp
ENSMUSG00000026659	Cortex	-0.644778	Liver	-0.684712	Development	-0.684712	-0.215573	Down	Down	DownDown
ENSMUSG00000026659	Cortex	-0.644778	Liver	-0.215573	Ageing	-0.684712	-0.215573	Down	Down	DownDown
ENSMUSG00000005681	Cortex	-0.905863	Liver	0.198206	Development	0.198206	0.467074	Up	Up	UpUp
ENSMUSG00000005681	Cortex	-0.905863	Liver	0.467074	Ageing	0.198206	0.467074	Up	Up	UpUp
ENSMUSG00000005677	Cortex	-0.803967	Liver	0.630656	Development	0.630656	0.275454	Up	Up	UpUp
ENSMUSG00000005677	Cortex	-0.803967	Liver	0.275454	Ageing	0.630656	0.275454	Up	Up	UpUp
ENSMUSG00000013997	Cortex	-1.02097	Liver	0.954994	Development	0.954994	0.0119763	Up	Up	UpUp
ENSMUSG00000013997	Cortex	-1.02097	Liver	0.0119763	Ageing	0.954994	0.0119763	Up	Up	UpUp
ENSMUSG00000103711	Cortex	-1.18862	Liver	-0.594619	Development	-0.594619	-0.215573	Down	Down	DownDown
ENSMUSG00000103711	Cortex	-1.18862	Liver	-0.215573	Ageing	-0.594619	-0.215573	Down	Down	DownDown
ENSMUSG00000037942	Cortex	-0.849699	Liver	-0.414431	Development	-0.414431	0.155691	Down	Up	DownUp
ENSMUSG00000037942	Cortex	-0.849699	Liver	0.155691	Ageing	-0.414431	0.155691	Down	Up	DownUp
ENSMUSG00000026542	Cortex	-0.836745	Liver	0.198206	Development	0.198206	0.131739	Up	Up	UpUp
ENSMUSG00000026542	Cortex	-0.836745	Liver	0.131739	Ageing	0.198206	0.131739	Up	Up	UpUp
ENSMUSG00000039783	Cortex	-0.970824	Liver	0.126131	Development	0.126131	-0.359288	Up	Down	UpDown
ENSMUSG00000039783	Cortex	-0.970824	Liver	-0.359288	Ageing	0.126131	-0.359288	Up	Down	UpDown
ENSMUSG00000010609	Cortex	-1.51613	Liver	0.252262	Development	0.252262	0.395217	Up	Up	UpUp
ENSMUSG00000010609	Cortex	-1.51613	Liver	0.395217	Ageing	0.252262	0.395217	Up	Up	UpUp
ENSMUSG00000026621	Cortex	-0.910613	Liver	-0.306319	Development	-0.306319	0.239525	Down	Up	DownUp
ENSMUSG00000026621	Cortex	-0.910613	Liver	0.239525	Ageing	-0.306319	0.239525	Down	Up	DownUp
ENSMUSG00000073481	Cortex	-2.37967	Liver	0.846881	Development	0.846881	0.251502	Up	Up	UpUp
ENSMUSG00000073481	Cortex	-2.37967	Liver	0.251502	Ageing	0.846881	0.251502	Up	Up	UpUp
ENSMUSG00000026614	Cortex	0.549259	Liver	-0.666694	Development	-0.666694	-0.443122	Down	Down	DownDown
ENSMUSG00000026614	Cortex	0.549259	Liver	-0.443122	Ageing	-0.666694	-0.443122	Down	Down	DownDown
ENSMUSG00000039246	Cortex	-0.905744	Liver	0.522544	Development	0.522544	0.0119763	Up	Up	UpUp
ENSMUSG00000039246	Cortex	-0.905744	Liver	0.0119763	Ageing	0.522544	0.0119763	Up	Up	UpUp
ENSMUSG00000010175	Cortex	-0.28958	Liver	-0.954994	Development	-0.954994	0.538932	Down	Up	DownUp
ENSMUSG00000010175	Cortex	-0.28958	Liver	0.538932	Ageing	-0.954994	0.538932	Down	Up	DownUp
ENSMUSG00000019762	Cortex	-0.89813	Liver	-0.486506	Development	-0.486506	-0.622766	Down	Down	DownDown
ENSMUSG00000019762	Cortex	-0.89813	Liver	-0.622766	Ageing	-0.486506	-0.622766	Down	Down	DownDown
ENSMUSG00000039981	Cortex	-1.28379	Liver	0.306319	Development	0.306319	-0.443122	Up	Down	UpDown
ENSMUSG00000039981	Cortex	-1.28379	Liver	-0.443122	Ageing	0.306319	-0.443122	Up	Down	UpDown
ENSMUSG00000020003	Cortex	-0.693969	Liver	0.684712	Development	0.684712	0.0958101	Up	Up	UpUp
ENSMUSG00000020003	Cortex	-0.693969	Liver	0.0958101	Ageing	0.684712	0.0958101	Up	Up	UpUp
ENSMUSG00000037542	Cortex	-0.810562	Liver	-0.252262	Development	-0.252262	0.538932	Down	Up	DownUp
ENSMUSG00000037542	Cortex	-0.810562	Liver	0.538932	Ageing	-0.252262	0.538932	Down	Up	DownUp
ENSMUSG00000053219	Cortex	-1.69804	Liver	-0.522544	Development	-0.522544	-0.754505	Down	Down	DownDown
ENSMUSG00000053219	Cortex	-1.69804	Liver	-0.754505	Ageing	-0.522544	-0.754505	Down	Down	DownDown
ENSMUSG00000078452	Cortex	-0.824261	Liver	-0.558581	Development	-0.558581	-0.0479051	Down	Down	DownDown
ENSMUSG00000078452	Cortex	-0.824261	Liver	-0.0479051	Ageing	-0.558581	-0.0479051	Down	Down	DownDown
ENSMUSG00000020010	Cortex	-1.25172	Liver	0.14415	Development	0.14415	-0.479051	Up	Down	UpDown
ENSMUSG00000020010	Cortex	-1.25172	Liver	-0.479051	Ageing	0.14415	-0.479051	Up	Down	UpDown
ENSMUSG00000019989	Cortex	-1.00435	Liver	-0.738769	Development	-0.738769	0.143715	Down	Up	DownUp
ENSMUSG00000019989	Cortex	-1.00435	Liver	0.143715	Ageing	-0.738769	0.143715	Down	Up	DownUp
ENSMUSG00000019987	Cortex	-1.14588	Liver	-0.594619	Development	-0.594619	-0.0239525	Down	Down	DownDown
ENSMUSG00000019987	Cortex	-1.14588	Liver	-0.0239525	Ageing	-0.594619	-0.0239525	Down	Down	DownDown
ENSMUSG00000071335	Cortex	-1.25101	Liver	-0.306319	Development	-0.306319	0.0838338	Down	Up	DownUp
ENSMUSG00000071335	Cortex	-1.25101	Liver	0.0838338	Ageing	-0.306319	0.0838338	Down	Up	DownUp
ENSMUSG00000038522	Cortex	-0.934589	Liver	0.270281	Development	0.270281	-0.598813	Up	Down	UpDown
ENSMUSG00000038522	Cortex	-0.934589	Liver	-0.598813	Ageing	0.270281	-0.598813	Up	Down	UpDown
ENSMUSG00000019802	Cortex	-2.16442	Liver	0.540562	Development	0.540562	-0.275454	Up	Down	UpDown
ENSMUSG00000019802	Cortex	-2.16442	Liver	-0.275454	Ageing	0.540562	-0.275454	Up	Down	UpDown
ENSMUSG00000038160	Cortex	-2.2228	Liver	0.234244	Development	0.234244	0.299407	Up	Up	UpUp
ENSMUSG00000038160	Cortex	-2.2228	Liver	0.299407	Ageing	0.234244	0.299407	Up	Up	UpUp
ENSMUSG00000003746	Cortex	-0.944524	Liver	0.846881	Development	0.846881	-0.491027	Up	Down	UpDown
ENSMUSG00000003746	Cortex	-0.944524	Liver	-0.491027	Ageing	0.846881	-0.491027	Up	Down	UpDown
ENSMUSG00000009654	Cortex	-0.850243	Liver	-0.270281	Development	-0.270281	-0.706599	Down	Down	DownDown
ENSMUSG00000009654	Cortex	-0.850243	Liver	-0.706599	Ageing	-0.270281	-0.706599	Down	Down	DownDown
ENSMUSG00000020098	Cortex	-1.0206	Liver	-0.342356	Development	-0.342356	-0.19162	Down	Down	DownDown
ENSMUSG00000020098	Cortex	-1.0206	Liver	-0.19162	Ageing	-0.342356	-0.19162	Down	Down	DownDown
ENSMUSG00000037171	Cortex	-0.329746	Liver	0.540562	Development	0.540562	-0.347312	Up	Down	UpDown
ENSMUSG00000037171	Cortex	-0.329746	Liver	-0.347312	Ageing	0.540562	-0.347312	Up	Down	UpDown
ENSMUSG00000020087	Cortex	-0.485267	Liver	-0.756787	Development	-0.756787	0.0598813	Down	Up	DownUp
ENSMUSG00000020087	Cortex	-0.485267	Liver	0.0598813	Ageing	-0.756787	0.0598813	Down	Up	DownUp
ENSMUSG00000036875	Cortex	-1.95801	Liver	-0.882919	Development	-0.882919	0.215573	Down	Up	DownUp
ENSMUSG00000036875	Cortex	-1.95801	Liver	0.215573	Ageing	-0.882919	0.215573	Down	Up	DownUp
ENSMUSG00000020072	Cortex	-1.0968	Liver	-0.378394	Development	-0.378394	0.323359	Down	Up	DownUp
ENSMUSG00000020072	Cortex	-1.0968	Liver	0.323359	Ageing	-0.378394	0.323359	Down	Up	DownUp
ENSMUSG00000112129	Cortex	-0.912388	Liver	0.0540562	Development	0.0540562	-0.0838338	Up	Down	UpDown
ENSMUSG00000112129	Cortex	-0.912388	Liver	-0.0838338	Ageing	0.0540562	-0.0838338	Up	Down	UpDown
ENSMUSG00000036764	Cortex	-1.07636	Liver	0.882919	Development	0.882919	0.467074	Up	Up	UpUp
ENSMUSG00000036764	Cortex	-1.07636	Liver	0.467074	Ageing	0.882919	0.467074	Up	Up	UpUp
ENSMUSG00000019944	Cortex	-0.839385	Liver	-0.991031	Development	-0.991031	-0.155691	Down	Down	DownDown
ENSMUSG00000019944	Cortex	-0.839385	Liver	-0.155691	Ageing	-0.991031	-0.155691	Down	Down	DownDown
ENSMUSG00000033318	Cortex	-2.40517	Liver	0.846881	Development	0.846881	-0.251502	Up	Down	UpDown
ENSMUSG00000033318	Cortex	-2.40517	Liver	-0.251502	Ageing	0.846881	-0.251502	Up	Down	UpDown
ENSMUSG00000001666	Cortex	-1.0622	Liver	0.900937	Development	0.900937	0.419169	Up	Up	UpUp
ENSMUSG00000001666	Cortex	-1.0622	Liver	0.419169	Ageing	0.900937	0.419169	Up	Up	UpUp
ENSMUSG00000033416	Cortex	-1.70083	Liver	-0.936975	Development	-0.936975	-0.694623	Down	Down	DownDown
ENSMUSG00000033416	Cortex	-1.70083	Liver	-0.694623	Ageing	-0.936975	-0.694623	Down	Down	DownDown
ENSMUSG00000033427	Cortex	-0.843471	Liver	0.630656	Development	0.630656	0.251502	Up	Up	UpUp
ENSMUSG00000033427	Cortex	-0.843471	Liver	0.251502	Ageing	0.630656	0.251502	Up	Up	UpUp
ENSMUSG00000001155	Cortex	-0.818001	Liver	0.126131	Development	0.126131	0.550908	Up	Up	UpUp
ENSMUSG00000001155	Cortex	-0.818001	Liver	0.550908	Ageing	0.126131	0.550908	Up	Up	UpUp
ENSMUSG00000033105	Cortex	0.304269	Liver	-0.954994	Development	-0.954994	-0.227549	Down	Down	DownDown
ENSMUSG00000033105	Cortex	0.304269	Liver	-0.227549	Ageing	-0.954994	-0.227549	Down	Down	DownDown
ENSMUSG00000001435	Cortex	-2.05673	Liver	-0.936975	Development	-0.936975	0.0239525	Down	Up	DownUp
ENSMUSG00000001435	Cortex	-2.05673	Liver	0.0239525	Ageing	-0.936975	0.0239525	Down	Up	DownUp
ENSMUSG00000051652	Cortex	0.330279	Liver	-0.882919	Development	-0.882919	0.251502	Down	Up	DownUp
ENSMUSG00000051652	Cortex	0.330279	Liver	0.251502	Ageing	-0.882919	0.251502	Down	Up	DownUp
ENSMUSG00000020131	Cortex	-0.496951	Liver	-0.648675	Development	-0.648675	0.407193	Down	Up	DownUp
ENSMUSG00000020131	Cortex	-0.496951	Liver	0.407193	Ageing	-0.648675	0.407193	Down	Up	DownUp
ENSMUSG00000035504	Cortex	-0.656371	Liver	0.0180187	Development	0.0180187	0.431145	Up	Up	UpUp
ENSMUSG00000035504	Cortex	-0.656371	Liver	0.431145	Ageing	0.0180187	0.431145	Up	Up	UpUp
ENSMUSG00000035041	Cortex	-0.92611	Liver	0.666694	Development	0.666694	0.0838338	Up	Up	UpUp
ENSMUSG00000035041	Cortex	-0.92611	Liver	0.0838338	Ageing	0.666694	0.0838338	Up	Up	UpUp
ENSMUSG00000020051	Cortex	-0.834205	Liver	0.0545455	Development	0.0545455	0.0479051	Up	Up	UpUp
ENSMUSG00000020051	Cortex	-0.834205	Liver	0.0479051	Ageing	0.0545455	0.0479051	Up	Up	UpUp
ENSMUSG00000035459	Cortex	-1.16092	Liver	0.0180187	Development	0.0180187	0.0718576	Up	Up	UpUp
ENSMUSG00000035459	Cortex	-1.16092	Liver	0.0718576	Ageing	0.0180187	0.0718576	Up	Up	UpUp
ENSMUSG00000020053	Cortex	-1.77032	Liver	-0.648675	Development	-0.648675	0.215573	Down	Up	DownUp
ENSMUSG00000020053	Cortex	-1.77032	Liver	0.215573	Ageing	-0.648675	0.215573	Down	Up	DownUp
ENSMUSG00000004359	Cortex	-1.10661	Liver	0.252262	Development	0.252262	0.299407	Up	Up	UpUp
ENSMUSG00000004359	Cortex	-1.10661	Liver	0.299407	Ageing	0.252262	0.299407	Up	Up	UpUp
ENSMUSG00000047638	Cortex	-0.780273	Liver	-0.180187	Development	-0.180187	0.19162	Down	Up	DownUp
ENSMUSG00000047638	Cortex	-0.780273	Liver	0.19162	Ageing	-0.180187	0.19162	Down	Up	DownUp
ENSMUSG00000015890	Cortex	-0.692681	Liver	-0.0900937	Development	-0.0900937	-0.0838338	Down	Down	DownDown
ENSMUSG00000015890	Cortex	-0.692681	Liver	-0.0838338	Ageing	-0.0900937	-0.0838338	Down	Down	DownDown
ENSMUSG00000020021	Cortex	-0.899173	Liver	0.954994	Development	0.954994	-0.538932	Up	Down	UpDown
ENSMUSG00000020021	Cortex	-0.899173	Liver	-0.538932	Ageing	0.954994	-0.538932	Up	Down	UpDown
ENSMUSG00000020228	Cortex	-1.47221	Liver	-0.991031	Development	-0.991031	-0.419169	Down	Down	DownDown
ENSMUSG00000020228	Cortex	-1.47221	Liver	-0.419169	Ageing	-0.991031	-0.419169	Down	Down	DownDown
ENSMUSG00000020123	Cortex	-0.659223	Liver	-0.792825	Development	-0.792825	-0.682647	Down	Down	DownDown
ENSMUSG00000020123	Cortex	-0.659223	Liver	-0.682647	Ageing	-0.792825	-0.682647	Down	Down	DownDown
ENSMUSG00000020102	Cortex	0.272163	Liver	-0.666694	Development	-0.666694	-0.479051	Down	Down	DownDown
ENSMUSG00000020102	Cortex	0.272163	Liver	-0.479051	Ageing	-0.666694	-0.479051	Down	Down	DownDown
ENSMUSG00000006736	Cortex	-1.60006	Liver	0.810844	Development	0.810844	-0.186747	Up	Down	UpDown
ENSMUSG00000006736	Cortex	-1.60006	Liver	-0.186747	Ageing	0.810844	-0.186747	Up	Down	UpDown
ENSMUSG00000025405	Cortex	-0.78382	Liver	-0.162169	Development	-0.162169	0.215573	Down	Up	DownUp
ENSMUSG00000025405	Cortex	-0.78382	Liver	0.215573	Ageing	-0.162169	0.215573	Down	Up	DownUp
ENSMUSG00000047492	Cortex	-0.7503	Liver	0.792825	Development	0.792825	-0.299407	Up	Down	UpDown
ENSMUSG00000047492	Cortex	-0.7503	Liver	-0.299407	Ageing	0.792825	-0.299407	Up	Down	UpDown
ENSMUSG00000025403	Cortex	-1.21218	Liver	-0.738769	Development	-0.738769	-0.503003	Down	Down	DownDown
ENSMUSG00000025403	Cortex	-1.21218	Liver	-0.503003	Ageing	-0.738769	-0.503003	Down	Down	DownDown
ENSMUSG00000074639	Cortex	-0.828411	Liver	0.270281	Development	0.270281	-0.210843	Up	Down	UpDown
ENSMUSG00000074639	Cortex	-0.828411	Liver	-0.210843	Ageing	0.270281	-0.210843	Up	Down	UpDown
ENSMUSG00000040134	Cortex	-0.857267	Liver	-0.180187	Development	-0.180187	0.167668	Down	Up	DownUp
ENSMUSG00000040134	Cortex	-0.857267	Liver	0.167668	Ageing	-0.180187	0.167668	Down	Up	DownUp
ENSMUSG00000025396	Cortex	-0.777771	Liver	0.180187	Development	0.180187	0.107786	Up	Up	UpUp
ENSMUSG00000025396	Cortex	-0.777771	Liver	0.107786	Ageing	0.180187	0.107786	Up	Up	UpUp
ENSMUSG00000099009	Cortex	-0.946544	Liver	0.2	Development	0.2	-0.0119763	Up	Down	UpDown
ENSMUSG00000099009	Cortex	-0.946544	Liver	-0.0119763	Ageing	0.2	-0.0119763	Up	Down	UpDown
ENSMUSG00000056148	Cortex	-0.801655	Liver	-0.198206	Development	-0.198206	-0.622766	Down	Down	DownDown
ENSMUSG00000056148	Cortex	-0.801655	Liver	-0.622766	Ageing	-0.198206	-0.622766	Down	Down	DownDown
ENSMUSG00000069456	Cortex	-0.601801	Liver	0.360375	Development	0.360375	-0.443122	Up	Down	UpDown
ENSMUSG00000069456	Cortex	-0.601801	Liver	-0.443122	Ageing	0.360375	-0.443122	Up	Down	UpDown
ENSMUSG00000040195	Cortex	-1.57931	Liver	-0.0540562	Development	-0.0540562	-0.646718	Down	Down	DownDown
ENSMUSG00000040195	Cortex	-1.57931	Liver	-0.646718	Ageing	-0.0540562	-0.646718	Down	Down	DownDown
ENSMUSG00000051716	Cortex	-0.896619	Liver	-0.486506	Development	-0.486506	-0.263478	Down	Down	DownDown
ENSMUSG00000051716	Cortex	-0.896619	Liver	-0.263478	Ageing	-0.486506	-0.263478	Down	Down	DownDown
ENSMUSG00000044005	Cortex	-0.179369	Liver	0.846881	Development	0.846881	0.143715	Up	Up	UpUp
ENSMUSG00000044005	Cortex	-0.179369	Liver	0.143715	Ageing	0.846881	0.143715	Up	Up	UpUp
ENSMUSG00000047631	Cortex	-0.850404	Liver	0.126131	Development	0.126131	0.347312	Up	Up	UpUp
ENSMUSG00000047631	Cortex	-0.850404	Liver	0.347312	Ageing	0.126131	0.347312	Up	Up	UpUp
ENSMUSG00000049858	Cortex	-1.17898	Liver	0.360375	Development	0.360375	0.323359	Up	Up	UpUp
ENSMUSG00000049858	Cortex	-1.17898	Liver	0.323359	Ageing	0.360375	0.323359	Up	Up	UpUp
ENSMUSG00000025350	Cortex	-1.46972	Liver	0.882919	Development	0.882919	0.155691	Up	Up	UpUp
ENSMUSG00000025350	Cortex	-1.46972	Liver	0.155691	Ageing	0.882919	0.155691	Up	Up	UpUp
ENSMUSG00000025347	Cortex	-0.895386	Liver	0.522544	Development	0.522544	0.455098	Up	Up	UpUp
ENSMUSG00000025347	Cortex	-0.895386	Liver	0.455098	Ageing	0.522544	0.455098	Up	Up	UpUp
ENSMUSG00000003585	Cortex	-0.43805	Liver	0.882919	Development	0.882919	0.491027	Up	Up	UpUp
ENSMUSG00000003585	Cortex	-0.43805	Liver	0.491027	Ageing	0.882919	0.491027	Up	Up	UpUp
ENSMUSG00000034285	Cortex	0.620439	Liver	-0.684712	Development	-0.684712	0.395217	Down	Up	DownUp
ENSMUSG00000034285	Cortex	0.620439	Liver	0.395217	Ageing	-0.684712	0.395217	Down	Up	DownUp
ENSMUSG00000020429	Cortex	-0.805358	Liver	-0.0900937	Development	-0.0900937	0.131739	Down	Up	DownUp
ENSMUSG00000020429	Cortex	-0.805358	Liver	0.131739	Ageing	-0.0900937	0.131739	Down	Up	DownUp
ENSMUSG00000020122	Cortex	-0.932134	Liver	-0.882919	Development	-0.882919	0.0479051	Down	Up	DownUp
ENSMUSG00000020122	Cortex	-0.932134	Liver	0.0479051	Ageing	-0.882919	0.0479051	Down	Up	DownUp
ENSMUSG00000020464	Cortex	-0.812731	Liver	-0.414431	Development	-0.414431	-0.682647	Down	Down	DownDown
ENSMUSG00000020464	Cortex	-0.812731	Liver	-0.682647	Ageing	-0.414431	-0.682647	Down	Down	DownDown
ENSMUSG00000055546	Cortex	-1.31679	Liver	-0.738769	Development	-0.738769	-0.371264	Down	Down	DownDown
ENSMUSG00000055546	Cortex	-1.31679	Liver	-0.371264	Ageing	-0.738769	-0.371264	Down	Down	DownDown
ENSMUSG00000040413	Cortex	-0.790102	Liver	-0.414431	Development	-0.414431	0.323359	Down	Up	DownUp
ENSMUSG00000040413	Cortex	-0.790102	Liver	0.323359	Ageing	-0.414431	0.323359	Down	Up	DownUp
ENSMUSG00000078922	Cortex	-1.20443	Liver	-0.108112	Development	-0.108112	0.778457	Down	Up	DownUp
ENSMUSG00000078922	Cortex	-1.20443	Liver	0.778457	Ageing	-0.108112	0.778457	Down	Up	DownUp
ENSMUSG00000018387	Cortex	0.160908	Liver	-0.108112	Development	-0.108112	0.359288	Down	Up	DownUp
ENSMUSG00000018387	Cortex	0.160908	Liver	0.359288	Ageing	-0.108112	0.359288	Down	Up	DownUp
ENSMUSG00000020514	Cortex	-0.958285	Liver	-0.396412	Development	-0.396412	0.299407	Down	Up	DownUp
ENSMUSG00000020514	Cortex	-0.958285	Liver	0.299407	Ageing	-0.396412	0.299407	Down	Up	DownUp
ENSMUSG00000000301	Cortex	-0.828399	Liver	-0.792825	Development	-0.792825	0.0479051	Down	Up	DownUp
ENSMUSG00000000301	Cortex	-0.828399	Liver	0.0479051	Ageing	-0.792825	0.0479051	Down	Up	DownUp
ENSMUSG00000020534	Cortex	-1.59229	Liver	-0.522544	Development	-0.522544	0.227549	Down	Up	DownUp
ENSMUSG00000020534	Cortex	-1.59229	Liver	0.227549	Ageing	-0.522544	0.227549	Down	Up	DownUp
ENSMUSG00000010122	Cortex	-0.921889	Liver	0.0360375	Development	0.0360375	0.431145	Up	Up	UpUp
ENSMUSG00000010122	Cortex	-0.921889	Liver	0.431145	Ageing	0.0360375	0.431145	Up	Up	UpUp
ENSMUSG00000070407	Cortex	-0.900995	Liver	-0.540562	Development	-0.540562	-0.126506	Down	Down	DownDown
ENSMUSG00000070407	Cortex	-0.900995	Liver	-0.126506	Ageing	-0.540562	-0.126506	Down	Down	DownDown
ENSMUSG00000050270	Cortex	-1.88508	Liver	-0.396412	Development	-0.396412	-0.251502	Down	Down	DownDown
ENSMUSG00000050270	Cortex	-1.88508	Liver	-0.251502	Ageing	-0.396412	-0.251502	Down	Down	DownDown
ENSMUSG00000069835	Cortex	-0.580601	Liver	-0.450469	Development	-0.450469	0.215573	Down	Up	DownUp
ENSMUSG00000069835	Cortex	-0.580601	Liver	0.215573	Ageing	-0.450469	0.215573	Down	Up	DownUp
ENSMUSG00000040963	Cortex	-0.88231	Liver	-0.162169	Development	-0.162169	-0.443122	Down	Down	DownDown
ENSMUSG00000040963	Cortex	-0.88231	Liver	-0.443122	Ageing	-0.162169	-0.443122	Down	Down	DownDown
ENSMUSG00000020884	Cortex	-0.782231	Liver	-0.234244	Development	-0.234244	0.155691	Down	Up	DownUp
ENSMUSG00000020884	Cortex	-0.782231	Liver	0.155691	Ageing	-0.234244	0.155691	Down	Up	DownUp
ENSMUSG00000046811	Cortex	-0.823102	Liver	-0.14415	Development	-0.14415	-0.227549	Down	Down	DownDown
ENSMUSG00000046811	Cortex	-0.823102	Liver	-0.227549	Ageing	-0.14415	-0.227549	Down	Down	DownDown
ENSMUSG00000057054	Cortex	-0.874425	Liver	0.72075	Development	0.72075	-0.119763	Up	Down	UpDown
ENSMUSG00000057054	Cortex	-0.874425	Liver	-0.119763	Ageing	0.72075	-0.119763	Up	Down	UpDown
ENSMUSG00000018449	Cortex	-1.47969	Liver	0.198206	Development	0.198206	-0.239525	Up	Down	UpDown
ENSMUSG00000018449	Cortex	-1.47969	Liver	-0.239525	Ageing	0.198206	-0.239525	Up	Down	UpDown
ENSMUSG00000018442	Cortex	-2.4408	Liver	-0.252262	Development	-0.252262	-0.371264	Down	Down	DownDown
ENSMUSG00000018442	Cortex	-2.4408	Liver	-0.371264	Ageing	-0.252262	-0.371264	Down	Down	DownDown
ENSMUSG00000070390	Cortex	-0.994158	Liver	0.684712	Development	0.684712	0.335335	Up	Up	UpUp
ENSMUSG00000070390	Cortex	-0.994158	Liver	0.335335	Ageing	0.684712	0.335335	Up	Up	UpUp
ENSMUSG00000005951	Cortex	-1.09707	Liver	0.918956	Development	0.918956	0.295181	Up	Up	UpUp
ENSMUSG00000005951	Cortex	-1.09707	Liver	0.295181	Ageing	0.918956	0.295181	Up	Up	UpUp
ENSMUSG00000020741	Cortex	-0.73736	Liver	0.792825	Development	0.792825	-0.670671	Up	Down	UpDown
ENSMUSG00000020741	Cortex	-0.73736	Liver	-0.670671	Ageing	0.792825	-0.670671	Up	Down	UpDown
ENSMUSG00000038224	Cortex	-0.82235	Liver	0.378394	Development	0.378394	0.658694	Up	Up	UpUp
ENSMUSG00000038224	Cortex	-0.82235	Liver	0.658694	Ageing	0.378394	0.658694	Up	Up	UpUp
ENSMUSG00000038217	Cortex	-2.0778	Liver	-0.450469	Development	-0.450469	0.0718576	Down	Up	DownUp
ENSMUSG00000038217	Cortex	-2.0778	Liver	0.0718576	Ageing	-0.450469	0.0718576	Down	Up	DownUp
ENSMUSG00000045374	Cortex	-1.05411	Liver	0.612637	Development	0.612637	0	Up	Down	UpDown
ENSMUSG00000045374	Cortex	-1.05411	Liver	0	Ageing	0.612637	0	Up	Down	UpDown
ENSMUSG00000000686	Cortex	-1.05179	Liver	0.738769	Development	0.738769	0.203596	Up	Up	UpUp
ENSMUSG00000000686	Cortex	-1.05179	Liver	0.203596	Ageing	0.738769	0.203596	Up	Up	UpUp
ENSMUSG00000017453	Cortex	-0.589711	Liver	-0.738769	Development	-0.738769	-0.0958101	Down	Down	DownDown
ENSMUSG00000017453	Cortex	-0.589711	Liver	-0.0958101	Ageing	-0.738769	-0.0958101	Down	Down	DownDown
ENSMUSG00000020829	Cortex	0.172968	Liver	-0.324337	Development	-0.324337	-0.407193	Down	Down	DownDown
ENSMUSG00000020829	Cortex	0.172968	Liver	-0.407193	Ageing	-0.324337	-0.407193	Down	Down	DownDown
ENSMUSG00000017344	Cortex	-0.137297	Liver	-0.108112	Development	-0.108112	0.107786	Down	Up	DownUp
ENSMUSG00000017344	Cortex	-0.137297	Liver	0.107786	Ageing	-0.108112	0.107786	Down	Up	DownUp
ENSMUSG00000037278	Cortex	-1.14706	Liver	-0.702731	Development	-0.702731	0.550908	Down	Up	DownUp
ENSMUSG00000037278	Cortex	-1.14706	Liver	0.550908	Ageing	-0.702731	0.550908	Down	Up	DownUp
ENSMUSG00000001123	Cortex	-2.92373	Liver	0.0540562	Development	0.0540562	0.610789	Up	Up	UpUp
ENSMUSG00000001123	Cortex	-2.92373	Liver	0.610789	Ageing	0.0540562	0.610789	Up	Up	UpUp
ENSMUSG00000020709	Cortex	-0.862373	Liver	0.954994	Development	0.954994	0.119763	Up	Up	UpUp
ENSMUSG00000020709	Cortex	-0.862373	Liver	0.119763	Ageing	0.954994	0.119763	Up	Up	UpUp
ENSMUSG00000020679	Cortex	-1.34692	Liver	0.774806	Development	0.774806	0.203596	Up	Up	UpUp
ENSMUSG00000020679	Cortex	-1.34692	Liver	0.203596	Ageing	0.774806	0.203596	Up	Up	UpUp
ENSMUSG00000007646	Cortex	-0.586201	Liver	-0.684712	Development	-0.684712	-0.718576	Down	Down	DownDown
ENSMUSG00000007646	Cortex	-0.586201	Liver	-0.718576	Ageing	-0.684712	-0.718576	Down	Down	DownDown
ENSMUSG00000034177	Cortex	-1.55081	Liver	0.882919	Development	0.882919	0.550908	Up	Up	UpUp
ENSMUSG00000034177	Cortex	-1.55081	Liver	0.550908	Ageing	0.882919	0.550908	Up	Up	UpUp
ENSMUSG00000020553	Cortex	-1.61693	Liver	0.882919	Development	0.882919	0.203596	Up	Up	UpUp
ENSMUSG00000020553	Cortex	-1.61693	Liver	0.203596	Ageing	0.882919	0.203596	Up	Up	UpUp
ENSMUSG00000076435	Cortex	-1.33079	Liver	0.666694	Development	0.666694	0.778457	Up	Up	UpUp
ENSMUSG00000076435	Cortex	-1.33079	Liver	0.778457	Ageing	0.666694	0.778457	Up	Up	UpUp
ENSMUSG00000018659	Cortex	-0.722106	Liver	0.738769	Development	0.738769	0.491027	Up	Up	UpUp
ENSMUSG00000018659	Cortex	-0.722106	Liver	0.491027	Ageing	0.738769	0.491027	Up	Up	UpUp
ENSMUSG00000019312	Cortex	-1.75729	Liver	0.846881	Development	0.846881	0.227549	Up	Up	UpUp
ENSMUSG00000019312	Cortex	-1.75729	Liver	0.227549	Ageing	0.846881	0.227549	Up	Up	UpUp
ENSMUSG00000001755	Cortex	-0.938431	Liver	-0.378394	Development	-0.378394	-0.239525	Down	Down	DownDown
ENSMUSG00000001755	Cortex	-0.938431	Liver	-0.239525	Ageing	-0.378394	-0.239525	Down	Down	DownDown
ENSMUSG00000078650	Cortex	-0.798182	Liver	0.180187	Development	0.180187	0.239525	Up	Up	UpUp
ENSMUSG00000078650	Cortex	-0.798182	Liver	0.239525	Ageing	0.180187	0.239525	Up	Up	UpUp
ENSMUSG00000048217	Cortex	-0.867758	Liver	0.162169	Development	0.162169	-0.455098	Up	Down	UpDown
ENSMUSG00000048217	Cortex	-0.867758	Liver	-0.455098	Ageing	0.162169	-0.455098	Up	Down	UpDown
ENSMUSG00000018677	Cortex	-2.15497	Liver	0.558581	Development	0.558581	0.826362	Up	Up	UpUp
ENSMUSG00000018677	Cortex	-2.15497	Liver	0.826362	Ageing	0.558581	0.826362	Up	Up	UpUp
ENSMUSG00000018486	Cortex	-0.59011	Liver	0.774806	Development	0.774806	-0.263478	Up	Down	UpDown
ENSMUSG00000018486	Cortex	-0.59011	Liver	-0.263478	Ageing	0.774806	-0.263478	Up	Down	UpDown
ENSMUSG00000000049	Cortex	-0.831731	Liver	0	Development	0	0.239525	Down	Up	DownUp
ENSMUSG00000000049	Cortex	-0.831731	Liver	0.239525	Ageing	0	0.239525	Down	Up	DownUp
ENSMUSG00000020620	Cortex	-0.674977	Liver	0.991031	Development	0.991031	-0.0239525	Up	Down	UpDown
ENSMUSG00000020620	Cortex	-0.674977	Liver	-0.0239525	Ageing	0.991031	-0.0239525	Up	Down	UpDown
ENSMUSG00000020614	Cortex	-0.765746	Liver	0.882919	Development	0.882919	-0.347312	Up	Down	UpDown
ENSMUSG00000020614	Cortex	-0.765746	Liver	-0.347312	Ageing	0.882919	-0.347312	Up	Down	UpDown
ENSMUSG00000044749	Cortex	-0.967431	Liver	0.14415	Development	0.14415	0	Up	Down	UpDown
ENSMUSG00000044749	Cortex	-0.967431	Liver	0	Ageing	0.14415	0	Up	Down	UpDown
ENSMUSG00000020604	Cortex	-0.877119	Liver	0.828862	Development	0.828862	0.89822	Up	Up	UpUp
ENSMUSG00000020604	Cortex	-0.877119	Liver	0.89822	Ageing	0.828862	0.89822	Up	Up	UpUp
ENSMUSG00000041920	Cortex	-0.290862	Liver	0.648675	Development	0.648675	0.275454	Up	Up	UpUp
ENSMUSG00000041920	Cortex	-0.290862	Liver	0.275454	Ageing	0.648675	0.275454	Up	Up	UpUp
ENSMUSG00000034641	Cortex	-1.88028	Liver	0.0900937	Development	0.0900937	0.514979	Up	Up	UpUp
ENSMUSG00000034641	Cortex	-1.88028	Liver	0.514979	Ageing	0.0900937	0.514979	Up	Up	UpUp
ENSMUSG00000034652	Cortex	-2.07786	Liver	-0.0180187	Development	-0.0180187	-0.299407	Down	Down	DownDown
ENSMUSG00000034652	Cortex	-2.07786	Liver	-0.299407	Ageing	-0.0180187	-0.299407	Down	Down	DownDown
ENSMUSG00000048498	Cortex	-0.960037	Liver	0.14415	Development	0.14415	0.216867	Up	Up	UpUp
ENSMUSG00000048498	Cortex	-0.960037	Liver	0.216867	Ageing	0.14415	0.216867	Up	Up	UpUp
ENSMUSG00000020733	Cortex	-0.749925	Liver	0.991031	Development	0.991031	0.107786	Up	Up	UpUp
ENSMUSG00000020733	Cortex	-0.749925	Liver	0.107786	Ageing	0.991031	0.107786	Up	Up	UpUp
ENSMUSG00000044788	Cortex	-0.19749	Liver	0.991031	Development	0.991031	0.89822	Up	Up	UpUp
ENSMUSG00000044788	Cortex	-0.19749	Liver	0.89822	Ageing	0.991031	0.89822	Up	Up	UpUp
ENSMUSG00000018861	Cortex	-0.439749	Liver	-0.198206	Development	-0.198206	-0.0718576	Down	Down	DownDown
ENSMUSG00000018861	Cortex	-0.439749	Liver	-0.0718576	Ageing	-0.198206	-0.0718576	Down	Down	DownDown
ENSMUSG00000045775	Cortex	-0.675558	Liver	0.810844	Development	0.810844	-0.431145	Up	Down	UpDown
ENSMUSG00000045775	Cortex	-0.675558	Liver	-0.431145	Ageing	0.810844	-0.431145	Up	Down	UpDown
ENSMUSG00000034427	Cortex	-1.07461	Liver	0.738769	Development	0.738769	0.646718	Up	Up	UpUp
ENSMUSG00000034427	Cortex	-1.07461	Liver	0.646718	Ageing	0.738769	0.646718	Up	Up	UpUp
ENSMUSG00000020777	Cortex	-0.241746	Liver	0.846881	Development	0.846881	-0.455098	Up	Down	UpDown
ENSMUSG00000020777	Cortex	-0.241746	Liver	-0.455098	Ageing	0.846881	-0.455098	Up	Down	UpDown
ENSMUSG00000017718	Cortex	-1.23803	Liver	0.414431	Development	0.414431	0.538932	Up	Up	UpUp
ENSMUSG00000017718	Cortex	-1.23803	Liver	0.538932	Ageing	0.414431	0.538932	Up	Up	UpUp
ENSMUSG00000025127	Cortex	-0.889067	Liver	-0.945455	Development	-0.945455	0.179644	Down	Up	DownUp
ENSMUSG00000025127	Cortex	-0.889067	Liver	0.179644	Ageing	-0.945455	0.179644	Down	Up	DownUp
ENSMUSG00000044034	Cortex	-0.664078	Liver	-0.2883	Development	-0.2883	0.0598813	Down	Up	DownUp
ENSMUSG00000044034	Cortex	-0.664078	Liver	0.0598813	Ageing	-0.2883	0.0598813	Down	Up	DownUp
ENSMUSG00000025137	Cortex	-0.257564	Liver	0.252262	Development	0.252262	-0.239525	Up	Down	UpDown
ENSMUSG00000025137	Cortex	-0.257564	Liver	-0.239525	Ageing	0.252262	-0.239525	Up	Down	UpDown
ENSMUSG00000020652	Cortex	-1.43123	Liver	-0.396412	Development	-0.396412	0.19162	Down	Up	DownUp
ENSMUSG00000020652	Cortex	-1.43123	Liver	0.19162	Ageing	-0.396412	0.19162	Down	Up	DownUp
ENSMUSG00000020609	Cortex	-0.87231	Liver	-0.234244	Development	-0.234244	0.682647	Down	Up	DownUp
ENSMUSG00000020609	Cortex	-0.87231	Liver	0.682647	Ageing	-0.234244	0.682647	Down	Up	DownUp
ENSMUSG00000036655	Cortex	-0.941756	Liver	0.126131	Development	0.126131	0.0239525	Up	Up	UpUp
ENSMUSG00000036655	Cortex	-0.941756	Liver	0.0239525	Ageing	0.126131	0.0239525	Up	Up	UpUp
ENSMUSG00000020629	Cortex	-1.87016	Liver	0.991031	Development	0.991031	0.323359	Up	Up	UpUp
ENSMUSG00000020629	Cortex	-1.87016	Liver	0.323359	Ageing	0.991031	0.323359	Up	Up	UpUp
ENSMUSG00000044573	Cortex	-1.11712	Liver	0.0900937	Development	0.0900937	-0.119763	Up	Down	UpDown
ENSMUSG00000044573	Cortex	-1.11712	Liver	-0.119763	Ageing	0.0900937	-0.119763	Up	Down	UpDown
ENSMUSG00000036136	Cortex	-1.30596	Liver	0	Development	0	-0.323359	Down	Down	DownDown
ENSMUSG00000036136	Cortex	-1.30596	Liver	-0.323359	Ageing	0	-0.323359	Down	Down	DownDown
ENSMUSG00000050103	Cortex	-0.971577	Liver	0.630656	Development	0.630656	0.658694	Up	Up	UpUp
ENSMUSG00000050103	Cortex	-0.971577	Liver	0.658694	Ageing	0.630656	0.658694	Up	Up	UpUp
ENSMUSG00000056899	Cortex	-0.870758	Liver	0.648675	Development	0.648675	-0.239525	Up	Down	UpDown
ENSMUSG00000056899	Cortex	-0.870758	Liver	-0.239525	Ageing	0.648675	-0.239525	Up	Down	UpDown
ENSMUSG00000020956	Cortex	-0.948914	Liver	0.414431	Development	0.414431	0.658694	Up	Up	UpUp
ENSMUSG00000020956	Cortex	-0.948914	Liver	0.658694	Ageing	0.414431	0.658694	Up	Up	UpUp
ENSMUSG00000035472	Cortex	-0.85863	Liver	0.882919	Development	0.882919	-0.0119763	Up	Down	UpDown
ENSMUSG00000035472	Cortex	-0.85863	Liver	-0.0119763	Ageing	0.882919	-0.0119763	Up	Down	UpDown
ENSMUSG00000021000	Cortex	-1.41597	Liver	0.846881	Development	0.846881	-0.0718576	Up	Down	UpDown
ENSMUSG00000021000	Cortex	-1.41597	Liver	-0.0718576	Ageing	0.846881	-0.0718576	Up	Down	UpDown
ENSMUSG00000021069	Cortex	-2.26903	Liver	-0.198206	Development	-0.198206	-0.395217	Down	Down	DownDown
ENSMUSG00000021069	Cortex	-2.26903	Liver	-0.395217	Ageing	-0.198206	-0.395217	Down	Down	DownDown
ENSMUSG00000019718	Cortex	-1.39	Liver	-0.828862	Development	-0.828862	0.263478	Down	Up	DownUp
ENSMUSG00000019718	Cortex	-1.39	Liver	0.263478	Ageing	-0.828862	0.263478	Down	Up	DownUp
ENSMUSG00000034435	Cortex	-1.96472	Liver	0.594619	Development	0.594619	0.407193	Up	Up	UpUp
ENSMUSG00000034435	Cortex	-1.96472	Liver	0.407193	Ageing	0.594619	0.407193	Up	Up	UpUp
ENSMUSG00000021048	Cortex	-1.85049	Liver	0.684712	Development	0.684712	0.526956	Up	Up	UpUp
ENSMUSG00000021048	Cortex	-1.85049	Liver	0.526956	Ageing	0.684712	0.526956	Up	Up	UpUp
ENSMUSG00000059060	Cortex	-1.1506	Liver	-0.954994	Development	-0.954994	-0.431145	Down	Down	DownDown
ENSMUSG00000059060	Cortex	-1.1506	Liver	-0.431145	Ageing	-0.954994	-0.431145	Down	Down	DownDown
ENSMUSG00000021135	Cortex	-0.813207	Liver	-0.0180187	Development	-0.0180187	0.167668	Down	Up	DownUp
ENSMUSG00000021135	Cortex	-0.813207	Liver	0.167668	Ageing	-0.0180187	0.167668	Down	Up	DownUp
ENSMUSG00000021136	Cortex	-0.278818	Liver	-0.792825	Development	-0.792825	-0.119763	Down	Down	DownDown
ENSMUSG00000021136	Cortex	-0.278818	Liver	-0.119763	Ageing	-0.792825	-0.119763	Down	Down	DownDown
ENSMUSG00000052392	Cortex	-0.58858	Liver	0.738769	Development	0.738769	-0.562884	Up	Down	UpDown
ENSMUSG00000052392	Cortex	-0.58858	Liver	-0.562884	Ageing	0.738769	-0.562884	Up	Down	UpDown
ENSMUSG00000021228	Cortex	-0.30739	Liver	0.630656	Development	0.630656	0.251502	Up	Up	UpUp
ENSMUSG00000021228	Cortex	-0.30739	Liver	0.251502	Ageing	0.630656	0.251502	Up	Up	UpUp
ENSMUSG00000021236	Cortex	-0.749506	Liver	0.666694	Development	0.666694	-0.670671	Up	Down	UpDown
ENSMUSG00000021236	Cortex	-0.749506	Liver	-0.670671	Ageing	0.666694	-0.670671	Up	Down	UpDown
ENSMUSG00000021238	Cortex	-1.26332	Liver	0.954994	Development	0.954994	0.0119763	Up	Up	UpUp
ENSMUSG00000021238	Cortex	-1.26332	Liver	0.0119763	Ageing	0.954994	0.0119763	Up	Up	UpUp
ENSMUSG00000021252	Cortex	-0.114328	Liver	-0.792825	Development	-0.792825	0.263478	Down	Up	DownUp
ENSMUSG00000021252	Cortex	-0.114328	Liver	0.263478	Ageing	-0.792825	0.263478	Down	Up	DownUp
ENSMUSG00000021033	Cortex	-1.25808	Liver	0.666694	Development	0.666694	0.0598813	Up	Up	UpUp
ENSMUSG00000021033	Cortex	-1.25808	Liver	0.0598813	Ageing	0.666694	0.0598813	Up	Up	UpUp
ENSMUSG00000021886	Cortex	-1.8216	Liver	0.378394	Development	0.378394	0.538932	Up	Up	UpUp
ENSMUSG00000021886	Cortex	-1.8216	Liver	0.538932	Ageing	0.378394	0.538932	Up	Up	UpUp
ENSMUSG00000061947	Cortex	-0.906567	Liver	-0.342356	Development	-0.342356	-0.574861	Down	Down	DownDown
ENSMUSG00000061947	Cortex	-0.906567	Liver	-0.574861	Ageing	-0.342356	-0.574861	Down	Down	DownDown
ENSMUSG00000060807	Cortex	-0.788339	Liver	-0.0180187	Development	-0.0180187	-0.491027	Down	Down	DownDown
ENSMUSG00000060807	Cortex	-0.788339	Liver	-0.491027	Ageing	-0.0180187	-0.491027	Down	Down	DownDown
ENSMUSG00000066366	Cortex	-0.864285	Liver	-0.0180187	Development	-0.0180187	0.28743	Down	Up	DownUp
ENSMUSG00000066366	Cortex	-0.864285	Liver	0.28743	Ageing	-0.0180187	0.28743	Down	Up	DownUp
ENSMUSG00000072849	Cortex	-0.939824	Liver	-0.702731	Development	-0.702731	-0.143715	Down	Down	DownDown
ENSMUSG00000072849	Cortex	-0.939824	Liver	-0.143715	Ageing	-0.702731	-0.143715	Down	Down	DownDown
ENSMUSG00000079015	Cortex	-0.920337	Liver	-0.234244	Development	-0.234244	0.371264	Down	Up	DownUp
ENSMUSG00000079015	Cortex	-0.920337	Liver	0.371264	Ageing	-0.234244	0.371264	Down	Up	DownUp
ENSMUSG00000063232	Cortex	-0.827407	Liver	-0.378394	Development	-0.378394	0.443122	Down	Up	DownUp
ENSMUSG00000063232	Cortex	-0.827407	Liver	0.443122	Ageing	-0.378394	0.443122	Down	Up	DownUp
ENSMUSG00000066363	Cortex	-1.23075	Liver	0.2883	Development	0.2883	0.251502	Up	Up	UpUp
ENSMUSG00000066363	Cortex	-1.23075	Liver	0.251502	Ageing	0.2883	0.251502	Up	Up	UpUp
ENSMUSG00000071178	Cortex	-0.868728	Liver	-0.180187	Development	-0.180187	0.227549	Down	Up	DownUp
ENSMUSG00000071178	Cortex	-0.868728	Liver	0.227549	Ageing	-0.180187	0.227549	Down	Up	DownUp
ENSMUSG00000071177	Cortex	-0.880524	Liver	-0.14415	Development	-0.14415	0.455098	Down	Up	DownUp
ENSMUSG00000071177	Cortex	-0.880524	Liver	0.455098	Ageing	-0.14415	0.455098	Down	Up	DownUp
ENSMUSG00000021091	Cortex	-1.11852	Liver	0.991031	Development	0.991031	0.778457	Up	Up	UpUp
ENSMUSG00000021091	Cortex	-1.11852	Liver	0.778457	Ageing	0.991031	0.778457	Up	Up	UpUp
ENSMUSG00000058207	Cortex	-0.878385	Liver	-0.450469	Development	-0.450469	0.0119763	Down	Up	DownUp
ENSMUSG00000058207	Cortex	-0.878385	Liver	0.0119763	Ageing	-0.450469	0.0119763	Down	Up	DownUp
ENSMUSG00000079012	Cortex	-0.943137	Liver	0.0360375	Development	0.0360375	0.455098	Up	Up	UpUp
ENSMUSG00000079012	Cortex	-0.943137	Liver	0.455098	Ageing	0.0360375	0.455098	Up	Up	UpUp
ENSMUSG00000021097	Cortex	-0.0540086	Liver	0.936975	Development	0.936975	-0.19162	Up	Down	UpDown
ENSMUSG00000021097	Cortex	-0.0540086	Liver	-0.19162	Ageing	0.936975	-0.19162	Up	Down	UpDown
ENSMUSG00000048856	Cortex	-0.978052	Liver	-0.630656	Development	-0.630656	-0.718576	Down	Down	DownDown
ENSMUSG00000048856	Cortex	-0.978052	Liver	-0.718576	Ageing	-0.630656	-0.718576	Down	Down	DownDown
ENSMUSG00000037686	Cortex	-0.986606	Liver	0.810844	Development	0.810844	0.479051	Up	Up	UpUp
ENSMUSG00000037686	Cortex	-0.986606	Liver	0.479051	Ageing	0.810844	0.479051	Up	Up	UpUp
ENSMUSG00000021213	Cortex	-1.30822	Liver	-0.234244	Development	-0.234244	0.275454	Down	Up	DownUp
ENSMUSG00000021213	Cortex	-1.30822	Liver	0.275454	Ageing	-0.234244	0.275454	Down	Up	DownUp
ENSMUSG00000021211	Cortex	-0.907737	Liver	-0.360375	Development	-0.360375	0.323359	Down	Up	DownUp
ENSMUSG00000021211	Cortex	-0.907737	Liver	0.323359	Ageing	-0.360375	0.323359	Down	Up	DownUp
ENSMUSG00000071551	Cortex	-0.783373	Liver	-0.954994	Development	-0.954994	-0.0119763	Down	Down	DownDown
ENSMUSG00000071551	Cortex	-0.783373	Liver	-0.0119763	Ageing	-0.954994	-0.0119763	Down	Down	DownDown
ENSMUSG00000021214	Cortex	-0.75341	Liver	0.396412	Development	0.396412	-0.778457	Up	Down	UpDown
ENSMUSG00000021214	Cortex	-0.75341	Liver	-0.778457	Ageing	0.396412	-0.778457	Up	Down	UpDown
ENSMUSG00000021210	Cortex	-0.804912	Liver	-0.342356	Development	-0.342356	0.46988	Down	Up	DownUp
ENSMUSG00000021210	Cortex	-0.804912	Liver	0.46988	Ageing	-0.342356	0.46988	Down	Up	DownUp
ENSMUSG00000045410	Cortex	-0.534747	Liver	0.378394	Development	0.378394	0.0359288	Up	Up	UpUp
ENSMUSG00000045410	Cortex	-0.534747	Liver	0.0359288	Ageing	0.378394	0.0359288	Up	Up	UpUp
ENSMUSG00000055137	Cortex	-0.8199	Liver	0.810844	Development	0.810844	-0.431145	Up	Down	UpDown
ENSMUSG00000055137	Cortex	-0.8199	Liver	-0.431145	Ageing	0.810844	-0.431145	Up	Down	UpDown
ENSMUSG00000021322	Cortex	-1.64491	Liver	-0.72075	Development	-0.72075	-0.778457	Down	Down	DownDown
ENSMUSG00000021322	Cortex	-1.64491	Liver	-0.778457	Ageing	-0.72075	-0.778457	Down	Down	DownDown
ENSMUSG00000036110	Cortex	-0.938163	Liver	0.234244	Development	0.234244	0.0479051	Up	Up	UpUp
ENSMUSG00000036110	Cortex	-0.938163	Liver	0.0479051	Ageing	0.234244	0.0479051	Up	Up	UpUp
ENSMUSG00000036083	Cortex	-0.806774	Liver	-0.306319	Development	-0.306319	-0.826362	Down	Down	DownDown
ENSMUSG00000036083	Cortex	-0.806774	Liver	-0.826362	Ageing	-0.306319	-0.826362	Down	Down	DownDown
ENSMUSG00000016756	Cortex	-1.13538	Liver	-0.882919	Development	-0.882919	-0.359288	Down	Down	DownDown
ENSMUSG00000016756	Cortex	-1.13538	Liver	-0.359288	Ageing	-0.882919	-0.359288	Down	Down	DownDown
ENSMUSG00000035958	Cortex	-1.42708	Liver	-0.828862	Development	-0.828862	-0.119763	Down	Down	DownDown
ENSMUSG00000035958	Cortex	-1.42708	Liver	-0.119763	Ageing	-0.828862	-0.119763	Down	Down	DownDown
ENSMUSG00000021340	Cortex	-0.280815	Liver	0.882919	Development	0.882919	0.419169	Up	Up	UpUp
ENSMUSG00000021340	Cortex	-0.280815	Liver	0.419169	Ageing	0.882919	0.419169	Up	Up	UpUp
ENSMUSG00000049115	Cortex	-2.35862	Liver	-0.072075	Development	-0.072075	-0.419169	Down	Down	DownDown
ENSMUSG00000049115	Cortex	-2.35862	Liver	-0.419169	Ageing	-0.072075	-0.419169	Down	Down	DownDown
ENSMUSG00000038415	Cortex	-0.468561	Liver	-0.666694	Development	-0.666694	-0.610789	Down	Down	DownDown
ENSMUSG00000038415	Cortex	-0.468561	Liver	-0.610789	Ageing	-0.666694	-0.610789	Down	Down	DownDown
ENSMUSG00000038286	Cortex	-2.70557	Liver	0.900937	Development	0.900937	0.311383	Up	Up	UpUp
ENSMUSG00000038286	Cortex	-2.70557	Liver	0.311383	Ageing	0.900937	0.311383	Up	Up	UpUp
ENSMUSG00000046949	Cortex	-2.28115	Liver	0.8649	Development	0.8649	0.347312	Up	Up	UpUp
ENSMUSG00000046949	Cortex	-2.28115	Liver	0.347312	Ageing	0.8649	0.347312	Up	Up	UpUp
ENSMUSG00000038982	Cortex	-1.6052	Liver	-0.0180187	Development	-0.0180187	0.562884	Down	Up	DownUp
ENSMUSG00000038982	Cortex	-1.6052	Liver	0.562884	Ageing	-0.0180187	0.562884	Down	Up	DownUp
ENSMUSG00000021364	Cortex	0.0305248	Liver	-0.991031	Development	-0.991031	-0.658694	Down	Down	DownDown
ENSMUSG00000021364	Cortex	0.0305248	Liver	-0.658694	Ageing	-0.991031	-0.658694	Down	Down	DownDown
ENSMUSG00000058022	Cortex	-1.26679	Liver	0.0360375	Development	0.0360375	0.347312	Up	Up	UpUp
ENSMUSG00000058022	Cortex	-1.26679	Liver	0.347312	Ageing	0.0360375	0.347312	Up	Up	UpUp
ENSMUSG00000021376	Cortex	-0.569751	Liver	-0.558581	Development	-0.558581	-0.263478	Down	Down	DownDown
ENSMUSG00000021376	Cortex	-0.569751	Liver	-0.263478	Ageing	-0.558581	-0.263478	Down	Down	DownDown
ENSMUSG00000037966	Cortex	-2.08945	Liver	0.882919	Development	0.882919	-0.0239525	Up	Down	UpDown
ENSMUSG00000037966	Cortex	-2.08945	Liver	-0.0239525	Ageing	0.882919	-0.0239525	Up	Down	UpDown
ENSMUSG00000025873	Cortex	-0.397034	Liver	0.162169	Development	0.162169	-0.682647	Up	Down	UpDown
ENSMUSG00000025873	Cortex	-0.397034	Liver	-0.682647	Ageing	0.162169	-0.682647	Up	Down	UpDown
ENSMUSG00000021492	Cortex	-0.787688	Liver	0.738769	Development	0.738769	0.574861	Up	Up	UpUp
ENSMUSG00000021492	Cortex	-0.787688	Liver	0.574861	Ageing	0.738769	0.574861	Up	Up	UpUp
ENSMUSG00000021509	Cortex	-1.01343	Liver	0.630656	Development	0.630656	0.107786	Up	Up	UpUp
ENSMUSG00000021509	Cortex	-1.01343	Liver	0.107786	Ageing	0.630656	0.107786	Up	Up	UpUp
ENSMUSG00000021539	Cortex	-0.792607	Liver	-0.342356	Development	-0.342356	-0.491027	Down	Down	DownDown
ENSMUSG00000021539	Cortex	-0.792607	Liver	-0.491027	Ageing	-0.342356	-0.491027	Down	Down	DownDown
ENSMUSG00000035509	Cortex	-0.122785	Liver	-0.14415	Development	-0.14415	0.263478	Down	Up	DownUp
ENSMUSG00000035509	Cortex	-0.122785	Liver	0.263478	Ageing	-0.14415	0.263478	Down	Up	DownUp
ENSMUSG00000050002	Cortex	-1.16904	Liver	0.108112	Development	0.108112	0.718576	Up	Up	UpUp
ENSMUSG00000050002	Cortex	-1.16904	Liver	0.718576	Ageing	0.108112	0.718576	Up	Up	UpUp
ENSMUSG00000069805	Cortex	-1.00256	Liver	-0.234244	Development	-0.234244	0.155691	Down	Up	DownUp
ENSMUSG00000069805	Cortex	-1.00256	Liver	0.155691	Ageing	-0.234244	0.155691	Down	Up	DownUp
ENSMUSG00000033114	Cortex	-1.71612	Liver	-0.558581	Development	-0.558581	0.479051	Down	Up	DownUp
ENSMUSG00000033114	Cortex	-1.71612	Liver	0.479051	Ageing	-0.558581	0.479051	Down	Up	DownUp
ENSMUSG00000021477	Cortex	-1.6536	Liver	-0.180187	Development	-0.180187	0.455098	Down	Up	DownUp
ENSMUSG00000021477	Cortex	-1.6536	Liver	0.455098	Ageing	-0.180187	0.455098	Down	Up	DownUp
ENSMUSG00000062382	Cortex	-1.75316	Liver	-0.792825	Development	-0.792825	-0.203596	Down	Down	DownDown
ENSMUSG00000062382	Cortex	-1.75316	Liver	-0.203596	Ageing	-0.792825	-0.203596	Down	Down	DownDown
ENSMUSG00000021620	Cortex	-0.804317	Liver	0.162169	Development	0.162169	-0.491027	Up	Down	UpDown
ENSMUSG00000021620	Cortex	-0.804317	Liver	-0.491027	Ageing	0.162169	-0.491027	Up	Down	UpDown
ENSMUSG00000021707	Cortex	-1.22089	Liver	-0.810844	Development	-0.810844	0.155691	Down	Up	DownUp
ENSMUSG00000021707	Cortex	-1.22089	Liver	0.155691	Ageing	-0.810844	0.155691	Down	Up	DownUp
ENSMUSG00000042118	Cortex	-0.787416	Liver	0.0540562	Development	0.0540562	-0.335335	Up	Down	UpDown
ENSMUSG00000042118	Cortex	-0.787416	Liver	-0.335335	Ageing	0.0540562	-0.335335	Up	Down	UpDown
ENSMUSG00000074768	Cortex	-0.83974	Liver	-0.0360375	Development	-0.0360375	0.0479051	Down	Up	DownUp
ENSMUSG00000074768	Cortex	-0.83974	Liver	0.0479051	Ageing	-0.0360375	0.0479051	Down	Up	DownUp
ENSMUSG00000042102	Cortex	-0.747127	Liver	0.324337	Development	0.324337	0.790433	Up	Up	UpUp
ENSMUSG00000042102	Cortex	-0.747127	Liver	0.790433	Ageing	0.324337	0.790433	Up	Up	UpUp
ENSMUSG00000021676	Cortex	-0.645708	Liver	0.846881	Development	0.846881	-0.179644	Up	Down	UpDown
ENSMUSG00000021676	Cortex	-0.645708	Liver	-0.179644	Ageing	0.846881	-0.179644	Up	Down	UpDown
ENSMUSG00000021646	Cortex	-1.01906	Liver	-0.234244	Development	-0.234244	0.538932	Down	Up	DownUp
ENSMUSG00000021646	Cortex	-1.01906	Liver	0.538932	Ageing	-0.234244	0.538932	Down	Up	DownUp
ENSMUSG00000078942	Cortex	-1.31375	Liver	0.414431	Development	0.414431	0.562884	Up	Up	UpUp
ENSMUSG00000078942	Cortex	-1.31375	Liver	0.562884	Ageing	0.414431	0.562884	Up	Up	UpUp
ENSMUSG00000078945	Cortex	-1.44576	Liver	0.336364	Development	0.336364	0.419169	Up	Up	UpUp
ENSMUSG00000078945	Cortex	-1.44576	Liver	0.419169	Ageing	0.336364	0.419169	Up	Up	UpUp
ENSMUSG00000021636	Cortex	-2.04263	Liver	-0.522544	Development	-0.522544	-0.538932	Down	Down	DownDown
ENSMUSG00000021636	Cortex	-2.04263	Liver	-0.538932	Ageing	-0.522544	-0.538932	Down	Down	DownDown
ENSMUSG00000048924	Cortex	-1.64909	Liver	-0.828862	Development	-0.828862	0.0479051	Down	Up	DownUp
ENSMUSG00000048924	Cortex	-1.64909	Liver	0.0479051	Ageing	-0.828862	0.0479051	Down	Up	DownUp
ENSMUSG00000021713	Cortex	-1.27229	Liver	0.414431	Development	0.414431	-0.371264	Up	Down	UpDown
ENSMUSG00000021713	Cortex	-1.27229	Liver	-0.371264	Ageing	0.414431	-0.371264	Up	Down	UpDown
ENSMUSG00000015536	Cortex	-2.28511	Liver	-0.180187	Development	-0.180187	-0.0838338	Down	Down	DownDown
ENSMUSG00000015536	Cortex	-2.28511	Liver	-0.0838338	Ageing	-0.180187	-0.0838338	Down	Down	DownDown
ENSMUSG00000025279	Cortex	-1.00332	Liver	-0.270281	Development	-0.270281	0.167668	Down	Up	DownUp
ENSMUSG00000025279	Cortex	-1.00332	Liver	0.167668	Ageing	-0.270281	0.167668	Down	Up	DownUp
ENSMUSG00000021751	Cortex	-1.2651	Liver	0.072075	Development	0.072075	0.239525	Up	Up	UpUp
ENSMUSG00000021751	Cortex	-1.2651	Liver	0.239525	Ageing	0.072075	0.239525	Up	Up	UpUp
ENSMUSG00000060579	Cortex	-0.285405	Liver	-0.738769	Development	-0.738769	0.299407	Down	Up	DownUp
ENSMUSG00000060579	Cortex	-0.285405	Liver	0.299407	Ageing	-0.738769	0.299407	Down	Up	DownUp
ENSMUSG00000021786	Cortex	-0.906481	Liver	0.216225	Development	0.216225	-0.694623	Up	Down	UpDown
ENSMUSG00000021786	Cortex	-0.906481	Liver	-0.694623	Ageing	0.216225	-0.694623	Up	Down	UpDown
ENSMUSG00000023243	Cortex	-1.638	Liver	-0.846881	Development	-0.846881	0.658694	Down	Up	DownUp
ENSMUSG00000023243	Cortex	-1.638	Liver	0.658694	Ageing	-0.846881	0.658694	Down	Up	DownUp
ENSMUSG00000039197	Cortex	-1.92001	Liver	0.774806	Development	0.774806	0.467074	Up	Up	UpUp
ENSMUSG00000039197	Cortex	-1.92001	Liver	0.467074	Ageing	0.774806	0.467074	Up	Up	UpUp
ENSMUSG00000015966	Cortex	-0.639612	Liver	-0.0900937	Development	-0.0900937	-0.119763	Down	Down	DownDown
ENSMUSG00000015966	Cortex	-0.639612	Liver	-0.119763	Ageing	-0.0900937	-0.119763	Down	Down	DownDown
ENSMUSG00000015970	Cortex	-0.878991	Liver	0.306319	Development	0.306319	0.778457	Up	Up	UpUp
ENSMUSG00000015970	Cortex	-0.878991	Liver	0.778457	Ageing	0.306319	0.778457	Up	Up	UpUp
ENSMUSG00000021922	Cortex	-1.34368	Liver	0.0900937	Development	0.0900937	0.347312	Up	Up	UpUp
ENSMUSG00000021922	Cortex	-1.34368	Liver	0.347312	Ageing	0.0900937	0.347312	Up	Up	UpUp
ENSMUSG00000006522	Cortex	-0.367669	Liver	0.936975	Development	0.936975	0.778457	Up	Up	UpUp
ENSMUSG00000006522	Cortex	-0.367669	Liver	0.778457	Ageing	0.936975	0.778457	Up	Up	UpUp
ENSMUSG00000006529	Cortex	-0.891609	Liver	-0.612637	Development	-0.612637	0.419169	Down	Up	DownUp
ENSMUSG00000006529	Cortex	-0.891609	Liver	0.419169	Ageing	-0.612637	0.419169	Down	Up	DownUp
ENSMUSG00000006527	Cortex	-0.0506315	Liver	-0.252262	Development	-0.252262	-0.826362	Down	Down	DownDown
ENSMUSG00000006527	Cortex	-0.0506315	Liver	-0.826362	Ageing	-0.252262	-0.826362	Down	Down	DownDown
ENSMUSG00000021884	Cortex	-1.23608	Liver	0.360375	Development	0.360375	0.131739	Up	Up	UpUp
ENSMUSG00000021884	Cortex	-1.23608	Liver	0.131739	Ageing	0.360375	0.131739	Up	Up	UpUp
ENSMUSG00000021900	Cortex	-1.5403	Liver	-0.43245	Development	-0.43245	0.0239525	Down	Up	DownUp
ENSMUSG00000021900	Cortex	-1.5403	Liver	0.0239525	Ageing	-0.43245	0.0239525	Down	Up	DownUp
ENSMUSG00000041471	Cortex	-0.86549	Liver	0.072075	Development	0.072075	-0.754505	Up	Down	UpDown
ENSMUSG00000041471	Cortex	-0.86549	Liver	-0.754505	Ageing	0.072075	-0.754505	Up	Down	UpDown
ENSMUSG00000021794	Cortex	-0.59327	Liver	0.162169	Development	0.162169	-0.311383	Up	Down	UpDown
ENSMUSG00000021794	Cortex	-0.59327	Liver	-0.311383	Ageing	0.162169	-0.311383	Up	Down	UpDown
ENSMUSG00000037798	Cortex	-1.04863	Liver	-0.072075	Development	-0.072075	0.538932	Down	Up	DownUp
ENSMUSG00000037798	Cortex	-1.04863	Liver	0.538932	Ageing	-0.072075	0.538932	Down	Up	DownUp
ENSMUSG00000037780	Cortex	-0.978306	Liver	-0.0360375	Development	-0.0360375	-0.419169	Down	Down	DownDown
ENSMUSG00000037780	Cortex	-0.978306	Liver	-0.419169	Ageing	-0.0360375	-0.419169	Down	Down	DownDown
ENSMUSG00000037722	Cortex	-2.17496	Liver	0.252262	Development	0.252262	-0.119763	Up	Down	UpDown
ENSMUSG00000037722	Cortex	-2.17496	Liver	-0.119763	Ageing	0.252262	-0.119763	Up	Down	UpDown
ENSMUSG00000037580	Cortex	-1.58937	Liver	0.450469	Development	0.450469	-0.550908	Up	Down	UpDown
ENSMUSG00000037580	Cortex	-1.58937	Liver	-0.550908	Ageing	0.450469	-0.550908	Up	Down	UpDown
ENSMUSG00000072115	Cortex	-2.02025	Liver	0.468487	Development	0.468487	0.550908	Up	Up	UpUp
ENSMUSG00000072115	Cortex	-2.02025	Liver	0.550908	Ageing	0.468487	0.550908	Up	Up	UpUp
ENSMUSG00000022210	Cortex	-2.71105	Liver	0.918956	Development	0.918956	0.371264	Up	Up	UpUp
ENSMUSG00000022210	Cortex	-2.71105	Liver	0.371264	Ageing	0.918956	0.371264	Up	Up	UpUp
ENSMUSG00000040822	Cortex	-1.5989	Liver	-0.450469	Development	-0.450469	-0.790433	Down	Down	DownDown
ENSMUSG00000040822	Cortex	-1.5989	Liver	-0.790433	Ageing	-0.450469	-0.790433	Down	Down	DownDown
ENSMUSG00000040472	Cortex	0.342005	Liver	-0.72075	Development	-0.72075	0.670671	Down	Up	DownUp
ENSMUSG00000040472	Cortex	0.342005	Liver	0.670671	Ageing	-0.72075	0.670671	Down	Up	DownUp
ENSMUSG00000040432	Cortex	-1.18152	Liver	-0.378394	Development	-0.378394	-0.562884	Down	Down	DownDown
ENSMUSG00000040432	Cortex	-1.18152	Liver	-0.562884	Ageing	-0.378394	-0.562884	Down	Down	DownDown
ENSMUSG00000002332	Cortex	-0.97756	Liver	0.666694	Development	0.666694	0.634742	Up	Up	UpUp
ENSMUSG00000002332	Cortex	-0.97756	Liver	0.634742	Ageing	0.666694	0.634742	Up	Up	UpUp
ENSMUSG00000019297	Cortex	-1.45181	Liver	-0.991031	Development	-0.991031	-0.0119763	Down	Down	DownDown
ENSMUSG00000019297	Cortex	-1.45181	Liver	-0.0119763	Ageing	-0.991031	-0.0119763	Down	Down	DownDown
ENSMUSG00000022219	Cortex	-0.611798	Liver	0.954994	Development	0.954994	0.347312	Up	Up	UpUp
ENSMUSG00000022219	Cortex	-0.611798	Liver	0.347312	Ageing	0.954994	0.347312	Up	Up	UpUp
ENSMUSG00000046352	Cortex	-0.652002	Liver	-0.2883	Development	-0.2883	0.514979	Down	Up	DownUp
ENSMUSG00000046352	Cortex	-0.652002	Liver	0.514979	Ageing	-0.2883	0.514979	Down	Up	DownUp
ENSMUSG00000091144	Cortex	-1.42723	Liver	-0.378394	Development	-0.378394	0.323359	Down	Up	DownUp
ENSMUSG00000091144	Cortex	-1.42723	Liver	0.323359	Ageing	-0.378394	0.323359	Down	Up	DownUp
ENSMUSG00000021981	Cortex	-1.8679	Liver	0.8649	Development	0.8649	0.155691	Up	Up	UpUp
ENSMUSG00000021981	Cortex	-1.8679	Liver	0.155691	Ageing	0.8649	0.155691	Up	Up	UpUp
ENSMUSG00000071350	Cortex	-1.05205	Liver	0.126131	Development	0.126131	-0.742528	Up	Down	UpDown
ENSMUSG00000071350	Cortex	-1.05205	Liver	-0.742528	Ageing	0.126131	-0.742528	Up	Down	UpDown
ENSMUSG00000035469	Cortex	-1.31884	Liver	-0.666694	Development	-0.666694	0.467074	Down	Up	DownUp
ENSMUSG00000035469	Cortex	-1.31884	Liver	0.467074	Ageing	-0.666694	0.467074	Down	Up	DownUp
ENSMUSG00000021990	Cortex	-0.268379	Liver	-0.162169	Development	-0.162169	0.335335	Down	Up	DownUp
ENSMUSG00000021990	Cortex	-0.268379	Liver	0.335335	Ageing	-0.162169	0.335335	Down	Up	DownUp
ENSMUSG00000021928	Cortex	-0.536196	Liver	-0.900937	Development	-0.900937	0.275454	Down	Up	DownUp
ENSMUSG00000021928	Cortex	-0.536196	Liver	0.275454	Ageing	-0.900937	0.275454	Down	Up	DownUp
ENSMUSG00000054733	Cortex	0.244902	Liver	-0.936975	Development	-0.936975	-0.886243	Down	Down	DownDown
ENSMUSG00000054733	Cortex	0.244902	Liver	-0.886243	Ageing	-0.936975	-0.886243	Down	Down	DownDown
ENSMUSG00000034450	Cortex	-0.831701	Liver	0.684712	Development	0.684712	0.311383	Up	Up	UpUp
ENSMUSG00000034450	Cortex	-0.831701	Liver	0.311383	Ageing	0.684712	0.311383	Up	Up	UpUp
ENSMUSG00000022040	Cortex	-1.01938	Liver	0.954994	Development	0.954994	0.28743	Up	Up	UpUp
ENSMUSG00000022040	Cortex	-1.01938	Liver	0.28743	Ageing	0.954994	0.28743	Up	Up	UpUp
ENSMUSG00000022041	Cortex	-0.366418	Liver	0.738769	Development	0.738769	-0.658694	Up	Down	UpDown
ENSMUSG00000022041	Cortex	-0.366418	Liver	-0.658694	Ageing	0.738769	-0.658694	Up	Down	UpDown
ENSMUSG00000022094	Cortex	-0.764505	Liver	0.846881	Development	0.846881	-0.323359	Up	Down	UpDown
ENSMUSG00000022094	Cortex	-0.764505	Liver	-0.323359	Ageing	0.846881	-0.323359	Up	Down	UpDown
ENSMUSG00000021999	Cortex	-0.849371	Liver	0.14415	Development	0.14415	-0.0838338	Up	Down	UpDown
ENSMUSG00000021999	Cortex	-0.849371	Liver	-0.0838338	Ageing	0.14415	-0.0838338	Up	Down	UpDown
ENSMUSG00000033446	Cortex	-2.97754	Liver	0.270281	Development	0.270281	-0.467074	Up	Down	UpDown
ENSMUSG00000033446	Cortex	-2.97754	Liver	-0.467074	Ageing	0.270281	-0.467074	Up	Down	UpDown
ENSMUSG00000044350	Cortex	-1.40234	Liver	0.180187	Development	0.180187	0.538932	Up	Up	UpUp
ENSMUSG00000044350	Cortex	-1.40234	Liver	0.538932	Ageing	0.180187	0.538932	Up	Up	UpUp
ENSMUSG00000058997	Cortex	-1.19459	Liver	0.991031	Development	0.991031	0.371264	Up	Up	UpUp
ENSMUSG00000058997	Cortex	-1.19459	Liver	0.371264	Ageing	0.991031	0.371264	Up	Up	UpUp
ENSMUSG00000041625	Cortex	-0.920444	Liver	0.991031	Development	0.991031	0.89822	Up	Up	UpUp
ENSMUSG00000041625	Cortex	-0.920444	Liver	0.89822	Ageing	0.991031	0.89822	Up	Up	UpUp
ENSMUSG00000064373	Cortex	-1.18681	Liver	0.810844	Development	0.810844	0.560241	Up	Up	UpUp
ENSMUSG00000064373	Cortex	-1.18681	Liver	0.560241	Ageing	0.810844	0.560241	Up	Up	UpUp
ENSMUSG00000041849	Cortex	-1.52461	Liver	0.126131	Development	0.126131	-0.28743	Up	Down	UpDown
ENSMUSG00000041849	Cortex	-1.52461	Liver	-0.28743	Ageing	0.126131	-0.28743	Up	Down	UpDown
ENSMUSG00000022149	Cortex	-0.758174	Liver	0.252262	Development	0.252262	-0.574861	Up	Down	UpDown
ENSMUSG00000022149	Cortex	-0.758174	Liver	-0.574861	Ageing	0.252262	-0.574861	Up	Down	UpDown
ENSMUSG00000054263	Cortex	-1.95296	Liver	0.792825	Development	0.792825	0.0359288	Up	Up	UpUp
ENSMUSG00000054263	Cortex	-1.95296	Liver	0.0359288	Ageing	0.792825	0.0359288	Up	Up	UpUp
ENSMUSG00000022253	Cortex	-0.406258	Liver	0.594619	Development	0.594619	-0.682647	Up	Down	UpDown
ENSMUSG00000022253	Cortex	-0.406258	Liver	-0.682647	Ageing	0.594619	-0.682647	Up	Down	UpDown
ENSMUSG00000049152	Cortex	-0.793284	Liver	-0.450469	Development	-0.450469	0.634742	Down	Up	DownUp
ENSMUSG00000049152	Cortex	-0.793284	Liver	0.634742	Ageing	-0.450469	0.634742	Down	Up	DownUp
ENSMUSG00000005268	Cortex	-0.75161	Liver	0.108112	Development	0.108112	-0.347312	Up	Down	UpDown
ENSMUSG00000005268	Cortex	-0.75161	Liver	-0.347312	Ageing	0.108112	-0.347312	Up	Down	UpDown
ENSMUSG00000089678	Cortex	-0.824928	Liver	-0.360375	Development	-0.360375	0.323359	Down	Up	DownUp
ENSMUSG00000089678	Cortex	-0.824928	Liver	0.323359	Ageing	-0.360375	0.323359	Down	Up	DownUp
ENSMUSG00000022247	Cortex	-0.369273	Liver	-0.882919	Development	-0.882919	0.514979	Down	Up	DownUp
ENSMUSG00000022247	Cortex	-0.369273	Liver	0.514979	Ageing	-0.882919	0.514979	Down	Up	DownUp
ENSMUSG00000022244	Cortex	-1.20398	Liver	0.900937	Development	0.900937	-0.131739	Up	Down	UpDown
ENSMUSG00000022244	Cortex	-1.20398	Liver	-0.131739	Ageing	0.900937	-0.131739	Up	Down	UpDown
ENSMUSG00000022241	Cortex	-1.62251	Liver	-0.954994	Development	-0.954994	-0.814386	Down	Down	DownDown
ENSMUSG00000022241	Cortex	-1.62251	Liver	-0.814386	Ageing	-0.954994	-0.814386	Down	Down	DownDown
ENSMUSG00000022236	Cortex	-1.01353	Liver	-0.270281	Development	-0.270281	0.263478	Down	Up	DownUp
ENSMUSG00000022236	Cortex	-1.01353	Liver	0.263478	Ageing	-0.270281	0.263478	Down	Up	DownUp
ENSMUSG00000022323	Cortex	-0.650062	Liver	0.846881	Development	0.846881	0.538932	Up	Up	UpUp
ENSMUSG00000022323	Cortex	-0.650062	Liver	0.538932	Ageing	0.846881	0.538932	Up	Up	UpUp
ENSMUSG00000022304	Cortex	-0.791223	Liver	0.324337	Development	0.324337	-0.0119763	Up	Down	UpDown
ENSMUSG00000022304	Cortex	-0.791223	Liver	-0.0119763	Ageing	0.324337	-0.0119763	Up	Down	UpDown
ENSMUSG00000038591	Cortex	-0.86231	Liver	0.936975	Development	0.936975	0.610789	Up	Up	UpUp
ENSMUSG00000038591	Cortex	-0.86231	Liver	0.610789	Ageing	0.936975	0.610789	Up	Up	UpUp
ENSMUSG00000063727	Cortex	-1.51669	Liver	-0.846881	Development	-0.846881	0.131739	Down	Up	DownUp
ENSMUSG00000063727	Cortex	-1.51669	Liver	0.131739	Ageing	-0.846881	0.131739	Down	Up	DownUp
ENSMUSG00000060429	Cortex	-1.57856	Liver	0.180187	Development	0.180187	-0.251502	Up	Down	UpDown
ENSMUSG00000060429	Cortex	-1.57856	Liver	-0.251502	Ageing	0.180187	-0.251502	Up	Down	UpDown
ENSMUSG00000047728	Cortex	-0.828276	Liver	-0.594619	Development	-0.594619	0.251502	Down	Up	DownUp
ENSMUSG00000047728	Cortex	-0.828276	Liver	0.251502	Ageing	-0.594619	0.251502	Down	Up	DownUp
ENSMUSG00000000934	Cortex	-0.190456	Liver	-0.738769	Development	-0.738769	-0.0359288	Down	Down	DownDown
ENSMUSG00000000934	Cortex	-0.190456	Liver	-0.0359288	Ageing	-0.738769	-0.0359288	Down	Down	DownDown
ENSMUSG00000098678	Cortex	-0.714743	Liver	0.0360375	Development	0.0360375	-0.119763	Up	Down	UpDown
ENSMUSG00000098678	Cortex	-0.714743	Liver	-0.119763	Ageing	0.0360375	-0.119763	Up	Down	UpDown
ENSMUSG00000022574	Cortex	-1.37184	Liver	0.558581	Development	0.558581	0.251502	Up	Up	UpUp
ENSMUSG00000022574	Cortex	-1.37184	Liver	0.251502	Ageing	0.558581	0.251502	Up	Up	UpUp
ENSMUSG00000034429	Cortex	-0.806554	Liver	-0.162169	Development	-0.162169	0.215573	Down	Up	DownUp
ENSMUSG00000034429	Cortex	-0.806554	Liver	0.215573	Ageing	-0.162169	0.215573	Down	Up	DownUp
ENSMUSG00000068246	Cortex	-0.902873	Liver	0.558581	Development	0.558581	0.0479051	Up	Up	UpUp
ENSMUSG00000068246	Cortex	-0.902873	Liver	0.0479051	Ageing	0.558581	0.0479051	Up	Up	UpUp
ENSMUSG00000010601	Cortex	-0.798341	Liver	0.0900937	Development	0.0900937	-0.371264	Up	Down	UpDown
ENSMUSG00000010601	Cortex	-0.798341	Liver	-0.371264	Ageing	0.0900937	-0.371264	Up	Down	UpDown
ENSMUSG00000044986	Cortex	-1.7162	Liver	0.666694	Development	0.666694	0.778457	Up	Up	UpUp
ENSMUSG00000044986	Cortex	-1.7162	Liver	0.778457	Ageing	0.666694	0.778457	Up	Up	UpUp
ENSMUSG00000016942	Cortex	-0.811959	Liver	0.756787	Development	0.756787	0.526956	Up	Up	UpUp
ENSMUSG00000016942	Cortex	-0.811959	Liver	0.526956	Ageing	0.756787	0.526956	Up	Up	UpUp
ENSMUSG00000006378	Cortex	-1.03029	Liver	-0.738769	Development	-0.738769	0.419169	Down	Up	DownUp
ENSMUSG00000006378	Cortex	-1.03029	Liver	0.419169	Ageing	-0.738769	0.419169	Down	Up	DownUp
ENSMUSG00000061740	Cortex	-1.09881	Liver	0.846881	Development	0.846881	0.742528	Up	Up	UpUp
ENSMUSG00000061740	Cortex	-1.09881	Liver	0.742528	Ageing	0.846881	0.742528	Up	Up	UpUp
ENSMUSG00000094806	Cortex	-0.832634	Liver	-0.234244	Development	-0.234244	0.167668	Down	Up	DownUp
ENSMUSG00000094806	Cortex	-0.832634	Liver	0.167668	Ageing	-0.234244	0.167668	Down	Up	DownUp
ENSMUSG00000022445	Cortex	-0.814349	Liver	0.126131	Development	0.126131	0.335335	Up	Up	UpUp
ENSMUSG00000022445	Cortex	-0.814349	Liver	0.335335	Ageing	0.126131	0.335335	Up	Up	UpUp
ENSMUSG00000068086	Cortex	-0.870314	Liver	0.0900937	Development	0.0900937	0.143715	Up	Up	UpUp
ENSMUSG00000068086	Cortex	-0.870314	Liver	0.143715	Ageing	0.0900937	0.143715	Up	Up	UpUp
ENSMUSG00000016619	Cortex	-0.844358	Liver	-0.396412	Development	-0.396412	-0.730552	Down	Down	DownDown
ENSMUSG00000016619	Cortex	-0.844358	Liver	-0.730552	Ageing	-0.396412	-0.730552	Down	Down	DownDown
ENSMUSG00000022383	Cortex	-0.900562	Liver	0.828862	Development	0.828862	-0.754505	Up	Down	UpDown
ENSMUSG00000022383	Cortex	-0.900562	Liver	-0.754505	Ageing	0.828862	-0.754505	Up	Down	UpDown
ENSMUSG00000035944	Cortex	-1.48763	Liver	0.810844	Development	0.810844	0.503003	Up	Up	UpUp
ENSMUSG00000035944	Cortex	-1.48763	Liver	0.503003	Ageing	0.810844	0.503003	Up	Up	UpUp
ENSMUSG00000035757	Cortex	-0.860701	Liver	-0.162169	Development	-0.162169	0.634742	Down	Up	DownUp
ENSMUSG00000035757	Cortex	-0.860701	Liver	0.634742	Ageing	-0.162169	0.634742	Down	Up	DownUp
ENSMUSG00000022615	Cortex	-0.884843	Liver	0.72075	Development	0.72075	0.778457	Up	Up	UpUp
ENSMUSG00000022615	Cortex	-0.884843	Liver	0.778457	Ageing	0.72075	0.778457	Up	Up	UpUp
ENSMUSG00000022464	Cortex	-2.15997	Liver	-0.522544	Development	-0.522544	-0.119763	Down	Down	DownDown
ENSMUSG00000022464	Cortex	-2.15997	Liver	-0.119763	Ageing	-0.522544	-0.119763	Down	Down	DownDown
ENSMUSG00000038009	Cortex	-0.881625	Liver	-0.234244	Development	-0.234244	0.275454	Down	Up	DownUp
ENSMUSG00000038009	Cortex	-0.881625	Liver	0.275454	Ageing	-0.234244	0.275454	Down	Up	DownUp
ENSMUSG00000023031	Cortex	-0.862588	Liver	0.558581	Development	0.558581	0.574861	Up	Up	UpUp
ENSMUSG00000023031	Cortex	-0.862588	Liver	0.574861	Ageing	0.558581	0.574861	Up	Up	UpUp
ENSMUSG00000023045	Cortex	-0.917831	Liver	0.486506	Development	0.486506	-0.323359	Up	Down	UpDown
ENSMUSG00000023045	Cortex	-0.917831	Liver	-0.323359	Ageing	0.486506	-0.323359	Up	Down	UpDown
ENSMUSG00000023044	Cortex	-2.14106	Liver	0.882919	Development	0.882919	0.38324	Up	Up	UpUp
ENSMUSG00000023044	Cortex	-2.14106	Liver	0.38324	Ageing	0.882919	0.38324	Up	Up	UpUp
ENSMUSG00000022711	Cortex	-2.33712	Liver	0.378394	Development	0.378394	-0.419169	Up	Down	UpDown
ENSMUSG00000022711	Cortex	-2.33712	Liver	-0.419169	Ageing	0.378394	-0.419169	Up	Down	UpDown
ENSMUSG00000022766	Cortex	-0.709939	Liver	-0.108112	Development	-0.108112	0.586837	Down	Up	DownUp
ENSMUSG00000022766	Cortex	-0.709939	Liver	0.586837	Ageing	-0.108112	0.586837	Down	Up	DownUp
ENSMUSG00000000326	Cortex	-0.557323	Liver	0.882919	Development	0.882919	0.694623	Up	Up	UpUp
ENSMUSG00000000326	Cortex	-0.557323	Liver	0.694623	Ageing	0.882919	0.694623	Up	Up	UpUp
ENSMUSG00000022847	Cortex	-0.364732	Liver	0.991031	Development	0.991031	0.0838338	Up	Up	UpUp
ENSMUSG00000022847	Cortex	-0.364732	Liver	0.0838338	Ageing	0.991031	0.0838338	Up	Up	UpUp
ENSMUSG00000022853	Cortex	-1.02023	Liver	0.882919	Development	0.882919	0.0479051	Up	Up	UpUp
ENSMUSG00000022853	Cortex	-1.02023	Liver	0.0479051	Ageing	0.882919	0.0479051	Up	Up	UpUp
ENSMUSG00000004462	Cortex	-0.867199	Liver	0.540562	Development	0.540562	0.167668	Up	Up	UpUp
ENSMUSG00000004462	Cortex	-0.867199	Liver	0.167668	Ageing	0.540562	0.167668	Up	Up	UpUp
ENSMUSG00000022868	Cortex	-0.780007	Liver	-0.162169	Development	-0.162169	0.455098	Down	Up	DownUp
ENSMUSG00000022868	Cortex	-0.780007	Liver	0.455098	Ageing	-0.162169	0.455098	Down	Up	DownUp
ENSMUSG00000022871	Cortex	-1.04083	Liver	-0.486506	Development	-0.486506	0.0359288	Down	Up	DownUp
ENSMUSG00000022871	Cortex	-1.04083	Liver	0.0359288	Ageing	-0.486506	0.0359288	Down	Up	DownUp
ENSMUSG00000022877	Cortex	-0.833777	Liver	-0.306319	Development	-0.306319	0.407193	Down	Up	DownUp
ENSMUSG00000022877	Cortex	-0.833777	Liver	0.407193	Ageing	-0.306319	0.407193	Down	Up	DownUp
ENSMUSG00000022875	Cortex	-0.8086	Liver	0.378394	Development	0.378394	0.622766	Up	Up	UpUp
ENSMUSG00000022875	Cortex	-0.8086	Liver	0.622766	Ageing	0.378394	0.622766	Up	Up	UpUp
ENSMUSG00000060459	Cortex	-0.906174	Liver	-0.270281	Development	-0.270281	0.311383	Down	Up	DownUp
ENSMUSG00000060459	Cortex	-0.906174	Liver	0.311383	Ageing	-0.270281	0.311383	Down	Up	DownUp
ENSMUSG00000022885	Cortex	-1.47318	Liver	-0.702731	Development	-0.702731	0.0479051	Down	Up	DownUp
ENSMUSG00000022885	Cortex	-1.47318	Liver	0.0479051	Ageing	-0.702731	0.0479051	Down	Up	DownUp
ENSMUSG00000022887	Cortex	0.306806	Liver	-0.954994	Development	-0.954994	-0.742528	Down	Down	DownDown
ENSMUSG00000022887	Cortex	0.306806	Liver	-0.742528	Ageing	-0.954994	-0.742528	Down	Down	DownDown
ENSMUSG00000022512	Cortex	-1.31596	Liver	-0.954994	Development	-0.954994	-0.431145	Down	Down	DownDown
ENSMUSG00000022512	Cortex	-1.31596	Liver	-0.431145	Ageing	-0.954994	-0.431145	Down	Down	DownDown
ENSMUSG00000022514	Cortex	-0.190636	Liver	0.630656	Development	0.630656	0.227549	Up	Up	UpUp
ENSMUSG00000022514	Cortex	-0.190636	Liver	0.227549	Ageing	0.630656	0.227549	Up	Up	UpUp
ENSMUSG00000023176	Cortex	-0.876018	Liver	-0.108112	Development	-0.108112	-0.131739	Down	Down	DownDown
ENSMUSG00000023176	Cortex	-0.876018	Liver	-0.131739	Ageing	-0.108112	-0.131739	Down	Down	DownDown
ENSMUSG00000022814	Cortex	-0.601184	Liver	-0.630656	Development	-0.630656	-0.419169	Down	Down	DownDown
ENSMUSG00000022814	Cortex	-0.601184	Liver	-0.419169	Ageing	-0.630656	-0.419169	Down	Down	DownDown
ENSMUSG00000035376	Cortex	-0.620952	Liver	0.882919	Development	0.882919	0	Up	Down	UpDown
ENSMUSG00000035376	Cortex	-0.620952	Liver	0	Ageing	0.882919	0	Up	Down	UpDown
ENSMUSG00000022844	Cortex	-2.48183	Liver	-0.0180187	Development	-0.0180187	0.143715	Down	Up	DownUp
ENSMUSG00000022844	Cortex	-2.48183	Liver	0.143715	Ageing	-0.0180187	0.143715	Down	Up	DownUp
ENSMUSG00000049502	Cortex	-1.73725	Liver	0.702731	Development	0.702731	0.407193	Up	Up	UpUp
ENSMUSG00000049502	Cortex	-1.73725	Liver	0.407193	Ageing	0.702731	0.407193	Up	Up	UpUp
ENSMUSG00000022827	Cortex	-1.20846	Liver	0.126131	Development	0.126131	0.107786	Up	Up	UpUp
ENSMUSG00000022827	Cortex	-1.20846	Liver	0.107786	Ageing	0.126131	0.107786	Up	Up	UpUp
ENSMUSG00000022821	Cortex	-0.828325	Liver	-0.0540562	Development	-0.0540562	-0.0598813	Down	Down	DownDown
ENSMUSG00000022821	Cortex	-0.828325	Liver	-0.0598813	Ageing	-0.0540562	-0.0598813	Down	Down	DownDown
ENSMUSG00000002847	Cortex	-1.00497	Liver	0.630656	Development	0.630656	-0.0119763	Up	Down	UpDown
ENSMUSG00000002847	Cortex	-1.00497	Liver	-0.0119763	Ageing	0.630656	-0.0119763	Up	Down	UpDown
ENSMUSG00000036292	Cortex	-1.29721	Liver	0.540562	Development	0.540562	-0.538932	Up	Down	UpDown
ENSMUSG00000036292	Cortex	-1.29721	Liver	-0.538932	Ageing	0.540562	-0.538932	Up	Down	UpDown
ENSMUSG00000053182	Cortex	-0.634222	Liver	0.900937	Development	0.900937	-0.419169	Up	Down	UpDown
ENSMUSG00000053182	Cortex	-0.634222	Liver	-0.419169	Ageing	0.900937	-0.419169	Up	Down	UpDown
ENSMUSG00000048087	Cortex	-0.781383	Liver	-0.162169	Development	-0.162169	0.311383	Down	Up	DownUp
ENSMUSG00000048087	Cortex	-0.781383	Liver	0.311383	Ageing	-0.162169	0.311383	Down	Up	DownUp
ENSMUSG00000022751	Cortex	-1.84356	Liver	-0.828862	Development	-0.828862	0.299407	Down	Up	DownUp
ENSMUSG00000022751	Cortex	-1.84356	Liver	0.299407	Ageing	-0.828862	0.299407	Down	Up	DownUp
ENSMUSG00000022742	Cortex	-0.75423	Liver	0.846881	Development	0.846881	0.658694	Up	Up	UpUp
ENSMUSG00000022742	Cortex	-0.75423	Liver	0.658694	Ageing	0.846881	0.658694	Up	Up	UpUp
ENSMUSG00000022889	Cortex	-1.06209	Liver	0.900937	Development	0.900937	-0.467074	Up	Down	UpDown
ENSMUSG00000022889	Cortex	-1.06209	Liver	-0.467074	Ageing	0.900937	-0.467074	Up	Down	UpDown
ENSMUSG00000022982	Cortex	-1.02776	Liver	0.372727	Development	0.372727	-0.0542169	Up	Down	UpDown
ENSMUSG00000022982	Cortex	-1.02776	Liver	-0.0542169	Ageing	0.372727	-0.0542169	Up	Down	UpDown
ENSMUSG00000039956	Cortex	-1.44021	Liver	0.936975	Development	0.936975	-0.371264	Up	Down	UpDown
ENSMUSG00000039956	Cortex	-1.44021	Liver	-0.371264	Ageing	0.936975	-0.371264	Up	Down	UpDown
ENSMUSG00000051483	Cortex	-0.150544	Liver	0.72075	Development	0.72075	0.215573	Up	Up	UpUp
ENSMUSG00000051483	Cortex	-0.150544	Liver	0.215573	Ageing	0.72075	0.215573	Up	Up	UpUp
ENSMUSG00000047109	Cortex	-0.607916	Liver	0.630656	Development	0.630656	0.407193	Up	Up	UpUp
ENSMUSG00000047109	Cortex	-0.607916	Liver	0.407193	Ageing	0.630656	0.407193	Up	Up	UpUp
ENSMUSG00000059481	Cortex	-0.839624	Liver	0	Development	0	0.107786	Down	Up	DownUp
ENSMUSG00000059481	Cortex	-0.839624	Liver	0.107786	Ageing	0	0.107786	Down	Up	DownUp
ENSMUSG00000023829	Cortex	-0.786393	Liver	0.126131	Development	0.126131	-0.0119763	Up	Down	UpDown
ENSMUSG00000023829	Cortex	-0.786393	Liver	-0.0119763	Ageing	0.126131	-0.0119763	Up	Down	UpDown
ENSMUSG00000062480	Cortex	-0.635817	Liver	0.648675	Development	0.648675	0.431145	Up	Up	UpUp
ENSMUSG00000062480	Cortex	-0.635817	Liver	0.431145	Ageing	0.648675	0.431145	Up	Up	UpUp
ENSMUSG00000024118	Cortex	-0.625019	Liver	-0.450469	Development	-0.450469	-0.443122	Down	Down	DownDown
ENSMUSG00000024118	Cortex	-0.625019	Liver	-0.443122	Ageing	-0.450469	-0.443122	Down	Down	DownDown
ENSMUSG00000046070	Cortex	-1.2182	Liver	-0.198206	Development	-0.198206	0.706599	Down	Up	DownUp
ENSMUSG00000046070	Cortex	-1.2182	Liver	0.706599	Ageing	-0.198206	0.706599	Down	Up	DownUp
ENSMUSG00000039183	Cortex	-0.953678	Liver	-0.702731	Development	-0.702731	0.646718	Down	Up	DownUp
ENSMUSG00000039183	Cortex	-0.953678	Liver	0.646718	Ageing	-0.702731	0.646718	Down	Up	DownUp
ENSMUSG00000024158	Cortex	-0.308757	Liver	0.846881	Development	0.846881	0.359288	Up	Up	UpUp
ENSMUSG00000024158	Cortex	-0.308757	Liver	0.359288	Ageing	0.846881	0.359288	Up	Up	UpUp
ENSMUSG00000045316	Cortex	-1.02676	Liver	0.828862	Development	0.828862	0.156627	Up	Up	UpUp
ENSMUSG00000045316	Cortex	-1.02676	Liver	0.156627	Ageing	0.828862	0.156627	Up	Up	UpUp
ENSMUSG00000036775	Cortex	-0.315962	Liver	0.846881	Development	0.846881	-0.0359288	Up	Down	UpDown
ENSMUSG00000036775	Cortex	-0.315962	Liver	-0.0359288	Ageing	0.846881	-0.0359288	Up	Down	UpDown
ENSMUSG00000025731	Cortex	-1.20724	Liver	0.630656	Development	0.630656	0.562884	Up	Up	UpUp
ENSMUSG00000025731	Cortex	-1.20724	Liver	0.562884	Ageing	0.630656	0.562884	Up	Up	UpUp
ENSMUSG00000024039	Cortex	0.0467642	Liver	0.954994	Development	0.954994	-0.80241	Up	Down	UpDown
ENSMUSG00000024039	Cortex	0.0467642	Liver	-0.80241	Ageing	0.954994	-0.80241	Up	Down	UpDown
ENSMUSG00000079563	Cortex	-0.921918	Liver	-0.108112	Development	-0.108112	-0.155691	Down	Down	DownDown
ENSMUSG00000079563	Cortex	-0.921918	Liver	-0.155691	Ageing	-0.108112	-0.155691	Down	Down	DownDown
ENSMUSG00000091586	Cortex	-1.09946	Liver	-0.522544	Development	-0.522544	0.0958101	Down	Up	DownUp
ENSMUSG00000091586	Cortex	-1.09946	Liver	0.0958101	Ageing	-0.522544	0.0958101	Down	Up	DownUp
ENSMUSG00000073424	Cortex	-0.0588478	Liver	0.991031	Development	0.991031	-0.467074	Up	Down	UpDown
ENSMUSG00000073424	Cortex	-0.0588478	Liver	-0.467074	Ageing	0.991031	-0.467074	Up	Down	UpDown
ENSMUSG00000024292	Cortex	-0.310845	Liver	0.991031	Development	0.991031	0.550908	Up	Up	UpUp
ENSMUSG00000024292	Cortex	-0.310845	Liver	0.550908	Ageing	0.991031	0.550908	Up	Up	UpUp
ENSMUSG00000073418	Cortex	-1.73435	Liver	0.954994	Development	0.954994	0.89822	Up	Up	UpUp
ENSMUSG00000073418	Cortex	-1.73435	Liver	0.89822	Ageing	0.954994	0.89822	Up	Up	UpUp
ENSMUSG00000090231	Cortex	-1.86262	Liver	-0.378394	Development	-0.378394	0.203596	Down	Up	DownUp
ENSMUSG00000090231	Cortex	-1.86262	Liver	0.203596	Ageing	-0.378394	0.203596	Down	Up	DownUp
ENSMUSG00000024371	Cortex	-2.82611	Liver	0.630656	Development	0.630656	0.263478	Up	Up	UpUp
ENSMUSG00000024371	Cortex	-2.82611	Liver	0.263478	Ageing	0.630656	0.263478	Up	Up	UpUp
ENSMUSG00000007038	Cortex	-0.458538	Liver	0.900937	Development	0.900937	0.347312	Up	Up	UpUp
ENSMUSG00000007038	Cortex	-0.458538	Liver	0.347312	Ageing	0.900937	0.347312	Up	Up	UpUp
ENSMUSG00000024391	Cortex	-0.795925	Liver	-0.504525	Development	-0.504525	0	Down	Down	DownDown
ENSMUSG00000024391	Cortex	-0.795925	Liver	0	Ageing	-0.504525	0	Down	Down	DownDown
ENSMUSG00000079507	Cortex	-1.06212	Liver	-0.5766	Development	-0.5766	-0.0598813	Down	Down	DownDown
ENSMUSG00000079507	Cortex	-1.06212	Liver	-0.0598813	Ageing	-0.5766	-0.0598813	Down	Down	DownDown
ENSMUSG00000067235	Cortex	-1.17725	Liver	0.378394	Development	0.378394	0.371264	Up	Up	UpUp
ENSMUSG00000067235	Cortex	-1.17725	Liver	0.371264	Ageing	0.378394	0.371264	Up	Up	UpUp
ENSMUSG00000023921	Cortex	-1.40128	Liver	0.954994	Development	0.954994	-0.311383	Up	Down	UpDown
ENSMUSG00000023921	Cortex	-1.40128	Liver	-0.311383	Ageing	0.954994	-0.311383	Up	Down	UpDown
ENSMUSG00000023963	Cortex	-2.14872	Liver	-0.792825	Development	-0.792825	0.251502	Down	Up	DownUp
ENSMUSG00000023963	Cortex	-2.14872	Liver	0.251502	Ageing	-0.792825	0.251502	Down	Up	DownUp
ENSMUSG00000047150	Cortex	-0.795064	Liver	-0.414431	Development	-0.414431	-0.742528	Down	Down	DownDown
ENSMUSG00000047150	Cortex	-0.795064	Liver	-0.742528	Ageing	-0.414431	-0.742528	Down	Down	DownDown
ENSMUSG00000051682	Cortex	-1.29832	Liver	-0.900937	Development	-0.900937	-0.419169	Down	Down	DownDown
ENSMUSG00000051682	Cortex	-1.29832	Liver	-0.419169	Ageing	-0.900937	-0.419169	Down	Down	DownDown
ENSMUSG00000043740	Cortex	-1.29797	Liver	0.198206	Development	0.198206	0.646718	Up	Up	UpUp
ENSMUSG00000043740	Cortex	-1.29797	Liver	0.646718	Ageing	0.198206	0.646718	Up	Up	UpUp
ENSMUSG00000064120	Cortex	-2.89281	Liver	0.0540562	Development	0.0540562	-0.0718576	Up	Down	UpDown
ENSMUSG00000064120	Cortex	-2.89281	Liver	-0.0718576	Ageing	0.0540562	-0.0718576	Up	Down	UpDown
ENSMUSG00000002769	Cortex	-1.1971	Liver	-0.414431	Development	-0.414431	0.0718576	Down	Up	DownUp
ENSMUSG00000002769	Cortex	-1.1971	Liver	0.0718576	Ageing	-0.414431	0.0718576	Down	Up	DownUp
ENSMUSG00000032915	Cortex	-1.33589	Liver	-0.504525	Development	-0.504525	-0.790433	Down	Down	DownDown
ENSMUSG00000032915	Cortex	-1.33589	Liver	-0.790433	Ageing	-0.504525	-0.790433	Down	Down	DownDown
ENSMUSG00000041168	Cortex	-0.65085	Liver	0.738769	Development	0.738769	0.562884	Up	Up	UpUp
ENSMUSG00000041168	Cortex	-0.65085	Liver	0.562884	Ageing	0.738769	0.562884	Up	Up	UpUp
ENSMUSG00000024164	Cortex	-2.0639	Liver	-0.252262	Development	-0.252262	0.682647	Down	Up	DownUp
ENSMUSG00000024164	Cortex	-2.0639	Liver	0.682647	Ageing	-0.252262	0.682647	Down	Up	DownUp
ENSMUSG00000024228	Cortex	-0.554355	Liver	0.828862	Development	0.828862	-0.574861	Up	Down	UpDown
ENSMUSG00000024228	Cortex	-0.554355	Liver	-0.574861	Ageing	0.828862	-0.574861	Up	Down	UpDown
ENSMUSG00000039193	Cortex	-1.2118	Liver	0.072075	Development	0.072075	-0.143715	Up	Down	UpDown
ENSMUSG00000039193	Cortex	-1.2118	Liver	-0.143715	Ageing	0.072075	-0.143715	Up	Down	UpDown
ENSMUSG00000024069	Cortex	-1.55932	Liver	0.0900937	Development	0.0900937	-0.203596	Up	Down	UpDown
ENSMUSG00000024069	Cortex	-1.55932	Liver	-0.203596	Ageing	0.0900937	-0.203596	Up	Down	UpDown
ENSMUSG00000035473	Cortex	-1.69888	Liver	0.810844	Development	0.810844	0.826362	Up	Up	UpUp
ENSMUSG00000035473	Cortex	-1.69888	Liver	0.826362	Ageing	0.810844	0.826362	Up	Up	UpUp
ENSMUSG00000000673	Cortex	-1.0971	Liver	0.234244	Development	0.234244	0.574861	Up	Up	UpUp
ENSMUSG00000000673	Cortex	-1.0971	Liver	0.574861	Ageing	0.234244	0.574861	Up	Up	UpUp
ENSMUSG00000040505	Cortex	-0.80315	Liver	0.126131	Development	0.126131	-0.443122	Up	Down	UpDown
ENSMUSG00000040505	Cortex	-0.80315	Liver	-0.443122	Ageing	0.126131	-0.443122	Up	Down	UpDown
ENSMUSG00000024254	Cortex	-0.779495	Liver	-0.342356	Development	-0.342356	0.0598813	Down	Up	DownUp
ENSMUSG00000024254	Cortex	-0.779495	Liver	0.0598813	Ageing	-0.342356	0.0598813	Down	Up	DownUp
ENSMUSG00000024135	Cortex	-0.10564	Liver	-0.882919	Development	-0.882919	-0.610789	Down	Down	DownDown
ENSMUSG00000024135	Cortex	-0.10564	Liver	-0.610789	Ageing	-0.882919	-0.610789	Down	Down	DownDown
ENSMUSG00000024131	Cortex	-0.663562	Liver	0.486506	Development	0.486506	0.203596	Up	Up	UpUp
ENSMUSG00000024131	Cortex	-0.663562	Liver	0.203596	Ageing	0.486506	0.203596	Up	Up	UpUp
ENSMUSG00000066878	Cortex	-0.467174	Liver	-0.522544	Development	-0.522544	-0.323359	Down	Down	DownDown
ENSMUSG00000066878	Cortex	-0.467174	Liver	-0.323359	Ageing	-0.522544	-0.323359	Down	Down	DownDown
ENSMUSG00000024424	Cortex	-0.429853	Liver	0.756787	Development	0.756787	-0.335335	Up	Down	UpDown
ENSMUSG00000024424	Cortex	-0.429853	Liver	-0.335335	Ageing	0.756787	-0.335335	Up	Down	UpDown
ENSMUSG00000036743	Cortex	-0.755217	Liver	-0.504525	Development	-0.504525	0.0359288	Down	Up	DownUp
ENSMUSG00000036743	Cortex	-0.755217	Liver	0.0359288	Ageing	-0.504525	0.0359288	Down	Up	DownUp
ENSMUSG00000024331	Cortex	-0.883689	Liver	-0.648675	Development	-0.648675	-0.443122	Down	Down	DownDown
ENSMUSG00000024331	Cortex	-0.883689	Liver	-0.443122	Ageing	-0.648675	-0.443122	Down	Down	DownDown
ENSMUSG00000044393	Cortex	-0.986193	Liver	0.336364	Development	0.336364	0.239525	Up	Up	UpUp
ENSMUSG00000044393	Cortex	-0.986193	Liver	0.239525	Ageing	0.336364	0.239525	Up	Up	UpUp
ENSMUSG00000061808	Cortex	-0.804482	Liver	-0.234244	Development	-0.234244	0.586837	Down	Up	DownUp
ENSMUSG00000061808	Cortex	-0.804482	Liver	0.586837	Ageing	-0.234244	0.586837	Down	Up	DownUp
ENSMUSG00000033107	Cortex	-1.18797	Liver	0.14415	Development	0.14415	0.155691	Up	Up	UpUp
ENSMUSG00000033107	Cortex	-1.18797	Liver	0.155691	Ageing	0.14415	0.155691	Up	Up	UpUp
ENSMUSG00000039616	Cortex	-1.45035	Liver	0.991031	Development	0.991031	0.359288	Up	Up	UpUp
ENSMUSG00000039616	Cortex	-1.45035	Liver	0.359288	Ageing	0.991031	0.359288	Up	Up	UpUp
ENSMUSG00000044982	Cortex	-1.00484	Liver	-0.0360375	Development	-0.0360375	-0.0239525	Down	Down	DownDown
ENSMUSG00000044982	Cortex	-1.00484	Liver	-0.0239525	Ageing	-0.0360375	-0.0239525	Down	Down	DownDown
ENSMUSG00000024386	Cortex	-0.889585	Liver	0.414431	Development	0.414431	0.371264	Up	Up	UpUp
ENSMUSG00000024386	Cortex	-0.889585	Liver	0.371264	Ageing	0.414431	0.371264	Up	Up	UpUp
ENSMUSG00000024354	Cortex	-1.15354	Liver	-0.594619	Development	-0.594619	-0.0301205	Down	Down	DownDown
ENSMUSG00000024354	Cortex	-1.15354	Liver	-0.0301205	Ageing	-0.594619	-0.0301205	Down	Down	DownDown
ENSMUSG00000052102	Cortex	-0.70244	Liver	0.5766	Development	0.5766	0	Up	Down	UpDown
ENSMUSG00000052102	Cortex	-0.70244	Liver	0	Ageing	0.5766	0	Up	Down	UpDown
ENSMUSG00000033022	Cortex	-1.08413	Liver	-0.648675	Development	-0.648675	-0.119763	Down	Down	DownDown
ENSMUSG00000033022	Cortex	-1.08413	Liver	-0.119763	Ageing	-0.648675	-0.119763	Down	Down	DownDown
ENSMUSG00000073565	Cortex	0.0765467	Liver	0.684712	Development	0.684712	0.0359288	Up	Up	UpUp
ENSMUSG00000073565	Cortex	0.0765467	Liver	0.0359288	Ageing	0.684712	0.0359288	Up	Up	UpUp
ENSMUSG00000024507	Cortex	-1.47916	Liver	-0.792825	Development	-0.792825	-0.0119763	Down	Down	DownDown
ENSMUSG00000024507	Cortex	-1.47916	Liver	-0.0119763	Ageing	-0.792825	-0.0119763	Down	Down	DownDown
ENSMUSG00000053644	Cortex	-0.851162	Liver	0.991031	Development	0.991031	-0.155691	Up	Down	UpDown
ENSMUSG00000053644	Cortex	-0.851162	Liver	-0.155691	Ageing	0.991031	-0.155691	Up	Down	UpDown
ENSMUSG00000073555	Cortex	-0.938687	Liver	-0.378394	Development	-0.378394	-0.251502	Down	Down	DownDown
ENSMUSG00000073555	Cortex	-0.938687	Liver	-0.251502	Ageing	-0.378394	-0.251502	Down	Down	DownDown
ENSMUSG00000054072	Cortex	-1.76321	Liver	-0.0360375	Development	-0.0360375	-0.431145	Down	Down	DownDown
ENSMUSG00000054072	Cortex	-1.76321	Liver	-0.431145	Ageing	-0.0360375	-0.431145	Down	Down	DownDown
ENSMUSG00000045991	Cortex	-0.58827	Liver	0.396412	Development	0.396412	0.622766	Up	Up	UpUp
ENSMUSG00000045991	Cortex	-0.58827	Liver	0.622766	Ageing	0.396412	0.622766	Up	Up	UpUp
ENSMUSG00000039529	Cortex	-1.40594	Liver	-0.360375	Development	-0.360375	-0.694623	Down	Down	DownDown
ENSMUSG00000039529	Cortex	-1.40594	Liver	-0.694623	Ageing	-0.360375	-0.694623	Down	Down	DownDown
ENSMUSG00000024646	Cortex	-1.07915	Liver	-0.846881	Development	-0.846881	0.455098	Down	Up	DownUp
ENSMUSG00000024646	Cortex	-1.07915	Liver	0.455098	Ageing	-0.846881	0.455098	Down	Up	DownUp
ENSMUSG00000024900	Cortex	-1.98531	Liver	-0.468487	Development	-0.468487	0.275454	Down	Up	DownUp
ENSMUSG00000024900	Cortex	-1.98531	Liver	0.275454	Ageing	-0.468487	0.275454	Down	Up	DownUp
ENSMUSG00000024866	Cortex	-1.29881	Liver	0.954994	Development	0.954994	0.371264	Up	Up	UpUp
ENSMUSG00000024866	Cortex	-1.29881	Liver	0.371264	Ageing	0.954994	0.371264	Up	Up	UpUp
ENSMUSG00000058216	Cortex	-1.24303	Liver	0.306319	Development	0.306319	0.538932	Up	Up	UpUp
ENSMUSG00000058216	Cortex	-1.24303	Liver	0.538932	Ageing	0.306319	0.538932	Up	Up	UpUp
ENSMUSG00000060803	Cortex	-1.4091	Liver	-0.108112	Development	-0.108112	0.610789	Down	Up	DownUp
ENSMUSG00000060803	Cortex	-1.4091	Liver	0.610789	Ageing	-0.108112	0.610789	Down	Up	DownUp
ENSMUSG00000042041	Cortex	-0.93618	Liver	0.252262	Development	0.252262	0.323359	Up	Up	UpUp
ENSMUSG00000042041	Cortex	-0.93618	Liver	0.323359	Ageing	0.252262	0.323359	Up	Up	UpUp
ENSMUSG00000024892	Cortex	-0.558079	Liver	0.828862	Development	0.828862	0.706599	Up	Up	UpUp
ENSMUSG00000024892	Cortex	-0.558079	Liver	0.706599	Ageing	0.828862	0.706599	Up	Up	UpUp
ENSMUSG00000034108	Cortex	-2.64866	Liver	-0.2883	Development	-0.2883	0.479051	Down	Up	DownUp
ENSMUSG00000034108	Cortex	-2.64866	Liver	0.479051	Ageing	-0.2883	0.479051	Down	Up	DownUp
ENSMUSG00000049562	Cortex	-0.371573	Liver	-0.666694	Development	-0.666694	0.143715	Down	Up	DownUp
ENSMUSG00000049562	Cortex	-0.371573	Liver	0.143715	Ageing	-0.666694	0.143715	Down	Up	DownUp
ENSMUSG00000024807	Cortex	-0.581665	Liver	0.936975	Development	0.936975	0.0838338	Up	Up	UpUp
ENSMUSG00000024807	Cortex	-0.581665	Liver	0.0838338	Ageing	0.936975	0.0838338	Up	Up	UpUp
ENSMUSG00000024799	Cortex	-0.389358	Liver	-0.684712	Development	-0.684712	0.19162	Down	Up	DownUp
ENSMUSG00000024799	Cortex	-0.389358	Liver	0.19162	Ageing	-0.684712	0.19162	Down	Up	DownUp
ENSMUSG00000034371	Cortex	-0.715354	Liver	-0.8649	Development	-0.8649	0.28743	Down	Up	DownUp
ENSMUSG00000034371	Cortex	-0.715354	Liver	0.28743	Ageing	-0.8649	0.28743	Down	Up	DownUp
ENSMUSG00000043789	Cortex	-0.623522	Liver	-0.702731	Development	-0.702731	0.0718576	Down	Up	DownUp
ENSMUSG00000043789	Cortex	-0.623522	Liver	0.0718576	Ageing	-0.702731	0.0718576	Down	Up	DownUp
ENSMUSG00000063683	Cortex	-0.810939	Liver	-0.468487	Development	-0.468487	0.347312	Down	Up	DownUp
ENSMUSG00000063683	Cortex	-0.810939	Liver	0.347312	Ageing	-0.468487	0.347312	Down	Up	DownUp
ENSMUSG00000071633	Cortex	-0.737575	Liver	-0.954994	Development	-0.954994	-0.443122	Down	Down	DownDown
ENSMUSG00000071633	Cortex	-0.737575	Liver	-0.443122	Ageing	-0.954994	-0.443122	Down	Down	DownDown
ENSMUSG00000037847	Cortex	-1.16746	Liver	0.0360375	Development	0.0360375	0.754505	Up	Up	UpUp
ENSMUSG00000037847	Cortex	-1.16746	Liver	0.754505	Ageing	0.0360375	0.754505	Up	Up	UpUp
ENSMUSG00000032702	Cortex	-1.43161	Liver	0.630656	Development	0.630656	-0.431145	Up	Down	UpDown
ENSMUSG00000032702	Cortex	-1.43161	Liver	-0.431145	Ageing	0.630656	-0.431145	Up	Down	UpDown
ENSMUSG00000024785	Cortex	-0.804752	Liver	-0.684712	Development	-0.684712	0.0598813	Down	Up	DownUp
ENSMUSG00000024785	Cortex	-0.804752	Liver	0.0598813	Ageing	-0.684712	0.0598813	Down	Up	DownUp
ENSMUSG00000024863	Cortex	-0.843842	Liver	-0.414431	Development	-0.414431	-0.491027	Down	Down	DownDown
ENSMUSG00000024863	Cortex	-0.843842	Liver	-0.491027	Ageing	-0.414431	-0.491027	Down	Down	DownDown
ENSMUSG00000024827	Cortex	0.106297	Liver	0.954994	Development	0.954994	-0.119763	Up	Down	UpDown
ENSMUSG00000024827	Cortex	0.106297	Liver	-0.119763	Ageing	0.954994	-0.119763	Up	Down	UpDown
ENSMUSG00000024899	Cortex	-1.4149	Liver	0.954994	Development	0.954994	0.179644	Up	Up	UpUp
ENSMUSG00000024899	Cortex	-1.4149	Liver	0.179644	Ageing	0.954994	0.179644	Up	Up	UpUp
ENSMUSG00000024781	Cortex	-1.89134	Liver	0.810844	Development	0.810844	-0.0718576	Up	Down	UpDown
ENSMUSG00000024781	Cortex	-1.89134	Liver	-0.0718576	Ageing	0.810844	-0.0718576	Up	Down	UpDown
ENSMUSG00000009378	Cortex	-1.02345	Liver	-0.504525	Development	-0.504525	-0.395217	Down	Down	DownDown
ENSMUSG00000009378	Cortex	-1.02345	Liver	-0.395217	Ageing	-0.504525	-0.395217	Down	Down	DownDown
ENSMUSG00000033610	Cortex	-0.907885	Liver	0.072075	Development	0.072075	-0.742528	Up	Down	UpDown
ENSMUSG00000033610	Cortex	-0.907885	Liver	-0.742528	Ageing	0.072075	-0.742528	Up	Down	UpDown
ENSMUSG00000024986	Cortex	-1.8137	Liver	-0.180187	Development	-0.180187	0.467074	Down	Up	DownUp
ENSMUSG00000024986	Cortex	-1.8137	Liver	0.467074	Ageing	-0.180187	0.467074	Down	Up	DownUp
ENSMUSG00000024990	Cortex	-1.16272	Liver	0.900937	Development	0.900937	0.467074	Up	Up	UpUp
ENSMUSG00000024990	Cortex	-1.16272	Liver	0.467074	Ageing	0.900937	0.467074	Up	Up	UpUp
ENSMUSG00000044026	Cortex	-1.16814	Liver	-0.774806	Development	-0.774806	-0.0239525	Down	Down	DownDown
ENSMUSG00000044026	Cortex	-1.16814	Liver	-0.0239525	Ageing	-0.774806	-0.0239525	Down	Down	DownDown
ENSMUSG00000074882	Cortex	-0.81986	Liver	0.072075	Development	0.072075	0.19162	Up	Up	UpUp
ENSMUSG00000074882	Cortex	-0.81986	Liver	0.19162	Ageing	0.072075	0.19162	Up	Up	UpUp
ENSMUSG00000092008	Cortex	-0.777949	Liver	-0.0180187	Development	-0.0180187	-0.0119763	Down	Down	DownDown
ENSMUSG00000092008	Cortex	-0.777949	Liver	-0.0119763	Ageing	-0.0180187	-0.0119763	Down	Down	DownDown
ENSMUSG00000025004	Cortex	-0.768751	Liver	0.108112	Development	0.108112	0.227549	Up	Up	UpUp
ENSMUSG00000025004	Cortex	-0.768751	Liver	0.227549	Ageing	0.108112	0.227549	Up	Up	UpUp
ENSMUSG00000054827	Cortex	-0.715628	Liver	-0.846881	Development	-0.846881	-0.419169	Down	Down	DownDown
ENSMUSG00000054827	Cortex	-0.715628	Liver	-0.419169	Ageing	-0.846881	-0.419169	Down	Down	DownDown
ENSMUSG00000042248	Cortex	-0.808505	Liver	-0.666694	Development	-0.666694	0.467074	Down	Up	DownUp
ENSMUSG00000042248	Cortex	-0.808505	Liver	0.467074	Ageing	-0.666694	0.467074	Down	Up	DownUp
ENSMUSG00000060613	Cortex	-0.848248	Liver	-0.756787	Development	-0.756787	0.598813	Down	Up	DownUp
ENSMUSG00000060613	Cortex	-0.848248	Liver	0.598813	Ageing	-0.756787	0.598813	Down	Up	DownUp
ENSMUSG00000025017	Cortex	-1.15537	Liver	0.594619	Development	0.594619	0.662651	Up	Up	UpUp
ENSMUSG00000025017	Cortex	-1.15537	Liver	0.662651	Ageing	0.594619	0.662651	Up	Up	UpUp
ENSMUSG00000025176	Cortex	-0.98885	Liver	-0.630656	Development	-0.630656	0.119763	Down	Up	DownUp
ENSMUSG00000025176	Cortex	-0.98885	Liver	0.119763	Ageing	-0.630656	0.119763	Down	Up	DownUp
ENSMUSG00000090369	Cortex	-0.806273	Liver	-0.918956	Development	-0.918956	-0.395217	Down	Down	DownDown
ENSMUSG00000090369	Cortex	-0.806273	Liver	-0.395217	Ageing	-0.918956	-0.395217	Down	Down	DownDown
ENSMUSG00000060224	Cortex	-1.28229	Liver	-0.2883	Development	-0.2883	0.143715	Down	Up	DownUp
ENSMUSG00000060224	Cortex	-1.28229	Liver	0.143715	Ageing	-0.2883	0.143715	Down	Up	DownUp
ENSMUSG00000025194	Cortex	-0.770556	Liver	-0.180187	Development	-0.180187	-0.526956	Down	Down	DownDown
ENSMUSG00000025194	Cortex	-0.770556	Liver	-0.526956	Ageing	-0.180187	-0.526956	Down	Down	DownDown
ENSMUSG00000025197	Cortex	-0.838738	Liver	0.882919	Development	0.882919	-0.431145	Up	Down	UpDown
ENSMUSG00000025197	Cortex	-0.838738	Liver	-0.431145	Ageing	0.882919	-0.431145	Up	Down	UpDown
ENSMUSG00000025196	Cortex	-0.971271	Liver	0.828862	Development	0.828862	0.335335	Up	Up	UpUp
ENSMUSG00000025196	Cortex	-0.971271	Liver	0.335335	Ageing	0.828862	0.335335	Up	Up	UpUp
ENSMUSG00000025198	Cortex	-1.15756	Liver	0.270281	Development	0.270281	-0.0479051	Up	Down	UpDown
ENSMUSG00000025198	Cortex	-1.15756	Liver	-0.0479051	Ageing	0.270281	-0.0479051	Up	Down	UpDown
ENSMUSG00000025200	Cortex	0.18203	Liver	-0.954994	Development	-0.954994	0.263478	Down	Up	DownUp
ENSMUSG00000025200	Cortex	0.18203	Liver	0.263478	Ageing	-0.954994	0.263478	Down	Up	DownUp
ENSMUSG00000025207	Cortex	0.484878	Liver	-0.954994	Development	-0.954994	-0.299407	Down	Down	DownDown
ENSMUSG00000025207	Cortex	0.484878	Liver	-0.299407	Ageing	-0.954994	-0.299407	Down	Down	DownDown
ENSMUSG00000025036	Cortex	-1.80864	Liver	-0.738769	Development	-0.738769	-0.730552	Down	Down	DownDown
ENSMUSG00000025036	Cortex	-1.80864	Liver	-0.730552	Ageing	-0.738769	-0.730552	Down	Down	DownDown
ENSMUSG00000024982	Cortex	-2.30101	Liver	0.810844	Development	0.810844	0.239525	Up	Up	UpUp
ENSMUSG00000024982	Cortex	-2.30101	Liver	0.239525	Ageing	0.810844	0.239525	Up	Up	UpUp
ENSMUSG00000025075	Cortex	-0.942973	Liver	-0.468487	Development	-0.468487	0.323359	Down	Up	DownUp
ENSMUSG00000025075	Cortex	-0.942973	Liver	0.323359	Ageing	-0.468487	0.323359	Down	Up	DownUp
ENSMUSG00000025077	Cortex	-0.785222	Liver	-0.594619	Development	-0.594619	0.419169	Down	Up	DownUp
ENSMUSG00000025077	Cortex	-0.785222	Liver	0.419169	Ageing	-0.594619	0.419169	Down	Up	DownUp
ENSMUSG00000025089	Cortex	0.00571894	Liver	0.954994	Development	0.954994	0.467074	Up	Up	UpUp
ENSMUSG00000025089	Cortex	0.00571894	Liver	0.467074	Ageing	0.954994	0.467074	Up	Up	UpUp
ENSMUSG00000026669	Cortex	-1.29382	Liver	-0.738769	Development	-0.738769	-0.419169	Down	Down	DownDown
ENSMUSG00000026669	Cortex	-1.29382	Liver	-0.419169	Ageing	-0.738769	-0.419169	Down	Down	DownDown
ENSMUSG00000026664	Cortex	-0.727646	Liver	0.991031	Development	0.991031	0.419169	Up	Up	UpUp
ENSMUSG00000026664	Cortex	-0.727646	Liver	0.419169	Ageing	0.991031	0.419169	Up	Up	UpUp
ENSMUSG00000045319	Cortex	-1.54286	Liver	-0.0540562	Development	-0.0540562	0.239525	Down	Up	DownUp
ENSMUSG00000045319	Cortex	-1.54286	Liver	0.239525	Ageing	-0.0540562	0.239525	Down	Up	DownUp
ENSMUSG00000025815	Cortex	0.0836433	Liver	-0.468487	Development	-0.468487	-0.179644	Down	Down	DownDown
ENSMUSG00000025815	Cortex	0.0836433	Liver	-0.179644	Ageing	-0.468487	-0.179644	Down	Down	DownDown
ENSMUSG00000039063	Cortex	-1.80136	Liver	-0.234244	Development	-0.234244	0.682647	Down	Up	DownUp
ENSMUSG00000039063	Cortex	-1.80136	Liver	0.682647	Ageing	-0.234244	0.682647	Down	Up	DownUp
ENSMUSG00000025817	Cortex	-1.31304	Liver	0.558581	Development	0.558581	-0.479051	Up	Down	UpDown
ENSMUSG00000025817	Cortex	-1.31304	Liver	-0.479051	Ageing	0.558581	-0.479051	Up	Down	UpDown
ENSMUSG00000037262	Cortex	-1.71709	Liver	-0.126131	Development	-0.126131	-0.419169	Down	Down	DownDown
ENSMUSG00000037262	Cortex	-1.71709	Liver	-0.419169	Ageing	-0.126131	-0.419169	Down	Down	DownDown
ENSMUSG00000037254	Cortex	-0.654014	Liver	-0.414431	Development	-0.414431	-0.335335	Down	Down	DownDown
ENSMUSG00000037254	Cortex	-0.654014	Liver	-0.335335	Ageing	-0.414431	-0.335335	Down	Down	DownDown
ENSMUSG00000023206	Cortex	-1.63409	Liver	0.774806	Development	0.774806	0.550908	Up	Up	UpUp
ENSMUSG00000023206	Cortex	-1.63409	Liver	0.550908	Ageing	0.774806	0.550908	Up	Up	UpUp
ENSMUSG00000026730	Cortex	-0.200332	Liver	0.774806	Development	0.774806	-0.239525	Up	Down	UpDown
ENSMUSG00000026730	Cortex	-0.200332	Liver	-0.239525	Ageing	0.774806	-0.239525	Up	Down	UpDown
ENSMUSG00000026781	Cortex	-0.100253	Liver	0.756787	Development	0.756787	-0.0359288	Up	Down	UpDown
ENSMUSG00000026781	Cortex	-0.100253	Liver	-0.0359288	Ageing	0.756787	-0.0359288	Up	Down	UpDown
ENSMUSG00000036833	Cortex	-1.71259	Liver	0.882919	Development	0.882919	0.395217	Up	Up	UpUp
ENSMUSG00000036833	Cortex	-1.71259	Liver	0.395217	Ageing	0.882919	0.395217	Up	Up	UpUp
ENSMUSG00000036813	Cortex	-1.0023	Liver	0.162169	Development	0.162169	0.491027	Up	Up	UpUp
ENSMUSG00000036813	Cortex	-1.0023	Liver	0.491027	Ageing	0.162169	0.491027	Up	Up	UpUp
ENSMUSG00000015083	Cortex	-0.855702	Liver	0.414431	Development	0.414431	0.323359	Up	Up	UpUp
ENSMUSG00000015083	Cortex	-0.855702	Liver	0.323359	Ageing	0.414431	0.323359	Up	Up	UpUp
ENSMUSG00000026938	Cortex	-1.80417	Liver	-0.684712	Development	-0.684712	0.119763	Down	Up	DownUp
ENSMUSG00000026938	Cortex	-1.80417	Liver	0.119763	Ageing	-0.684712	0.119763	Down	Up	DownUp
ENSMUSG00000026924	Cortex	-1.34737	Liver	0.162169	Development	0.162169	-0.323359	Up	Down	UpDown
ENSMUSG00000026924	Cortex	-1.34737	Liver	-0.323359	Ageing	0.162169	-0.323359	Up	Down	UpDown
ENSMUSG00000014852	Cortex	0.0716393	Liver	0.882919	Development	0.882919	-0.275454	Up	Down	UpDown
ENSMUSG00000014852	Cortex	0.0716393	Liver	-0.275454	Ageing	0.882919	-0.275454	Up	Down	UpDown
ENSMUSG00000009614	Cortex	-1.18079	Liver	0.396412	Development	0.396412	-0.251502	Up	Down	UpDown
ENSMUSG00000009614	Cortex	-1.18079	Liver	-0.251502	Ageing	0.396412	-0.251502	Up	Down	UpDown
ENSMUSG00000015335	Cortex	-1.07709	Liver	-0.666694	Development	-0.666694	-0.155691	Down	Down	DownDown
ENSMUSG00000015335	Cortex	-1.07709	Liver	-0.155691	Ageing	-0.666694	-0.155691	Down	Down	DownDown
ENSMUSG00000039648	Cortex	-1.25607	Liver	0.2883	Development	0.2883	0.263478	Up	Up	UpUp
ENSMUSG00000039648	Cortex	-1.25607	Liver	0.263478	Ageing	0.2883	0.263478	Up	Up	UpUp
ENSMUSG00000026849	Cortex	-0.242929	Liver	0	Development	0	0.28743	Down	Up	DownUp
ENSMUSG00000026849	Cortex	-0.242929	Liver	0.28743	Ageing	0	0.28743	Down	Up	DownUp
ENSMUSG00000076441	Cortex	-0.798599	Liver	0.72075	Development	0.72075	0.850315	Up	Up	UpUp
ENSMUSG00000076441	Cortex	-0.798599	Liver	0.850315	Ageing	0.72075	0.850315	Up	Up	UpUp
ENSMUSG00000009566	Cortex	-1.28131	Liver	-0.954994	Development	-0.954994	-0.0598813	Down	Down	DownDown
ENSMUSG00000009566	Cortex	-1.28131	Liver	-0.0598813	Ageing	-0.954994	-0.0598813	Down	Down	DownDown
ENSMUSG00000035875	Cortex	-0.855457	Liver	-0.846881	Development	-0.846881	-0.467074	Down	Down	DownDown
ENSMUSG00000035875	Cortex	-0.855457	Liver	-0.467074	Ageing	-0.846881	-0.467074	Down	Down	DownDown
ENSMUSG00000026870	Cortex	-1.2022	Liver	-0.252262	Development	-0.252262	0.826362	Down	Up	DownUp
ENSMUSG00000026870	Cortex	-1.2022	Liver	0.826362	Ageing	-0.252262	0.826362	Down	Up	DownUp
ENSMUSG00000026749	Cortex	-0.954979	Liver	-0.666694	Development	-0.666694	0.239525	Down	Up	DownUp
ENSMUSG00000026749	Cortex	-0.954979	Liver	0.239525	Ageing	-0.666694	0.239525	Down	Up	DownUp
ENSMUSG00000026866	Cortex	-0.902422	Liver	-0.252262	Development	-0.252262	-0.119763	Down	Down	DownDown
ENSMUSG00000026866	Cortex	-0.902422	Liver	-0.119763	Ageing	-0.252262	-0.119763	Down	Down	DownDown
ENSMUSG00000026839	Cortex	0.156307	Liver	0.846881	Development	0.846881	-0.215573	Up	Down	UpDown
ENSMUSG00000026839	Cortex	0.156307	Liver	-0.215573	Ageing	0.846881	-0.215573	Up	Down	UpDown
ENSMUSG00000060703	Cortex	-1.98627	Liver	0.846881	Development	0.846881	0.431145	Up	Up	UpUp
ENSMUSG00000060703	Cortex	-1.98627	Liver	0.431145	Ageing	0.846881	0.431145	Up	Up	UpUp
ENSMUSG00000026888	Cortex	-0.947929	Liver	0.2883	Development	0.2883	0	Up	Down	UpDown
ENSMUSG00000026888	Cortex	-0.947929	Liver	0	Ageing	0.2883	0	Up	Down	UpDown
ENSMUSG00000027048	Cortex	-0.818867	Liver	-0.14415	Development	-0.14415	0.0359288	Down	Up	DownUp
ENSMUSG00000027048	Cortex	-0.818867	Liver	0.0359288	Ageing	-0.14415	0.0359288	Down	Up	DownUp
ENSMUSG00000075256	Cortex	-0.611953	Liver	-0.234244	Development	-0.234244	-0.0239525	Down	Down	DownDown
ENSMUSG00000075256	Cortex	-0.611953	Liver	-0.0239525	Ageing	-0.234244	-0.0239525	Down	Down	DownDown
ENSMUSG00000027071	Cortex	-0.0702855	Liver	0.612637	Development	0.612637	-0.251502	Up	Down	UpDown
ENSMUSG00000027071	Cortex	-0.0702855	Liver	-0.251502	Ageing	0.612637	-0.251502	Up	Down	UpDown
ENSMUSG00000027249	Cortex	-0.872941	Liver	0.0360375	Development	0.0360375	0.407193	Up	Up	UpUp
ENSMUSG00000027249	Cortex	-0.872941	Liver	0.407193	Ageing	0.0360375	0.407193	Up	Up	UpUp
ENSMUSG00000027222	Cortex	-1.02089	Liver	0.414431	Development	0.414431	0.455098	Up	Up	UpUp
ENSMUSG00000027222	Cortex	-1.02089	Liver	0.455098	Ageing	0.414431	0.455098	Up	Up	UpUp
ENSMUSG00000027187	Cortex	-1.58547	Liver	-0.954994	Development	-0.954994	0.263478	Down	Up	DownUp
ENSMUSG00000027187	Cortex	-1.58547	Liver	0.263478	Ageing	-0.954994	0.263478	Down	Up	DownUp
ENSMUSG00000027173	Cortex	-1.13197	Liver	0.378394	Development	0.378394	0.335335	Up	Up	UpUp
ENSMUSG00000027173	Cortex	-1.13197	Liver	0.335335	Ageing	0.378394	0.335335	Up	Up	UpUp
ENSMUSG00000041660	Cortex	-0.961549	Liver	0.702731	Development	0.702731	0.119763	Up	Up	UpUp
ENSMUSG00000041660	Cortex	-0.961549	Liver	0.119763	Ageing	0.702731	0.119763	Up	Up	UpUp
ENSMUSG00000046814	Cortex	-1.44976	Liver	-0.486506	Development	-0.486506	-0.251502	Down	Down	DownDown
ENSMUSG00000046814	Cortex	-1.44976	Liver	-0.251502	Ageing	-0.486506	-0.251502	Down	Down	DownDown
ENSMUSG00000070730	Cortex	0.141981	Liver	0.882919	Development	0.882919	-0.0479051	Up	Down	UpDown
ENSMUSG00000070730	Cortex	0.141981	Liver	-0.0479051	Ageing	0.882919	-0.0479051	Up	Down	UpDown
ENSMUSG00000027227	Cortex	-1.61744	Liver	0.0363636	Development	0.0363636	0.874267	Up	Up	UpUp
ENSMUSG00000027227	Cortex	-1.61744	Liver	0.874267	Ageing	0.0363636	0.874267	Up	Up	UpUp
ENSMUSG00000068394	Cortex	-1.28115	Liver	-0.828862	Development	-0.828862	-0.119763	Down	Down	DownDown
ENSMUSG00000068394	Cortex	-1.28115	Liver	-0.119763	Ageing	-0.828862	-0.119763	Down	Down	DownDown
ENSMUSG00000027359	Cortex	-0.69179	Liver	0.5766	Development	0.5766	0.610789	Up	Up	UpUp
ENSMUSG00000027359	Cortex	-0.69179	Liver	0.610789	Ageing	0.5766	0.610789	Up	Up	UpUp
ENSMUSG00000044145	Cortex	-0.668484	Liver	-0.0900937	Development	-0.0900937	0.0958101	Down	Up	DownUp
ENSMUSG00000044145	Cortex	-0.668484	Liver	0.0958101	Ageing	-0.0900937	0.0958101	Down	Up	DownUp
ENSMUSG00000058620	Cortex	-0.856149	Liver	0.558581	Development	0.558581	0.38324	Up	Up	UpUp
ENSMUSG00000058620	Cortex	-0.856149	Liver	0.38324	Ageing	0.558581	0.38324	Up	Up	UpUp
ENSMUSG00000046338	Cortex	-0.785422	Liver	0.270281	Development	0.270281	0.263478	Up	Up	UpUp
ENSMUSG00000046338	Cortex	-0.785422	Liver	0.263478	Ageing	0.270281	0.263478	Up	Up	UpUp
ENSMUSG00000027399	Cortex	-1.1	Liver	0.342356	Development	0.342356	-0.155691	Up	Down	UpDown
ENSMUSG00000027399	Cortex	-1.1	Liver	-0.155691	Ageing	0.342356	-0.155691	Up	Down	UpDown
ENSMUSG00000027322	Cortex	-1.50334	Liver	-0.536364	Development	-0.536364	0.131739	Down	Up	DownUp
ENSMUSG00000027322	Cortex	-1.50334	Liver	0.131739	Ageing	-0.536364	0.131739	Down	Up	DownUp
ENSMUSG00000027358	Cortex	-1.35358	Liver	0.702731	Development	0.702731	-0.526956	Up	Down	UpDown
ENSMUSG00000027358	Cortex	-1.35358	Liver	-0.526956	Ageing	0.702731	-0.526956	Up	Down	UpDown
ENSMUSG00000027261	Cortex	-0.832269	Liver	-0.509091	Development	-0.509091	0.443122	Down	Up	DownUp
ENSMUSG00000027261	Cortex	-0.832269	Liver	0.443122	Ageing	-0.509091	0.443122	Down	Up	DownUp
ENSMUSG00000027357	Cortex	-0.633113	Liver	0.108112	Development	0.108112	0.155691	Up	Up	UpUp
ENSMUSG00000027357	Cortex	-0.633113	Liver	0.155691	Ageing	0.108112	0.155691	Up	Up	UpUp
ENSMUSG00000053916	Cortex	0.116868	Liver	0.630656	Development	0.630656	0.0598813	Up	Up	UpUp
ENSMUSG00000053916	Cortex	0.116868	Liver	0.0598813	Ageing	0.630656	0.0598813	Up	Up	UpUp
ENSMUSG00000032869	Cortex	-0.400725	Liver	-0.450469	Development	-0.450469	0.275454	Down	Up	DownUp
ENSMUSG00000032869	Cortex	-0.400725	Liver	0.275454	Ageing	-0.450469	0.275454	Down	Up	DownUp
ENSMUSG00000027478	Cortex	-1.32722	Liver	-0.702731	Development	-0.702731	-0.479051	Down	Down	DownDown
ENSMUSG00000027478	Cortex	-1.32722	Liver	-0.479051	Ageing	-0.702731	-0.479051	Down	Down	DownDown
ENSMUSG00000000876	Cortex	-1.6816	Liver	0.486506	Development	0.486506	0.38324	Up	Up	UpUp
ENSMUSG00000000876	Cortex	-1.6816	Liver	0.38324	Ageing	0.486506	0.38324	Up	Up	UpUp
ENSMUSG00000027597	Cortex	-1.01212	Liver	-0.666694	Development	-0.666694	0.203596	Down	Up	DownUp
ENSMUSG00000027597	Cortex	-1.01212	Liver	0.203596	Ageing	-0.666694	0.203596	Down	Up	DownUp
ENSMUSG00000038312	Cortex	-1.29388	Liver	-0.666694	Development	-0.666694	0.503003	Down	Up	DownUp
ENSMUSG00000038312	Cortex	-1.29388	Liver	0.503003	Ageing	-0.666694	0.503003	Down	Up	DownUp
ENSMUSG00000027610	Cortex	-1.75186	Liver	0.954994	Development	0.954994	0.80241	Up	Up	UpUp
ENSMUSG00000027610	Cortex	-1.75186	Liver	0.80241	Ageing	0.954994	0.80241	Up	Up	UpUp
ENSMUSG00000074646	Cortex	-0.359311	Liver	0.072075	Development	0.072075	0.0958101	Up	Up	UpUp
ENSMUSG00000074646	Cortex	-0.359311	Liver	0.0958101	Ageing	0.072075	0.0958101	Up	Up	UpUp
ENSMUSG00000027636	Cortex	-0.670669	Liver	0.882919	Development	0.882919	0.155691	Up	Up	UpUp
ENSMUSG00000027636	Cortex	-0.670669	Liver	0.155691	Ageing	0.882919	0.155691	Up	Up	UpUp
ENSMUSG00000016024	Cortex	-2.39681	Liver	-0.450469	Development	-0.450469	0.179644	Down	Up	DownUp
ENSMUSG00000016024	Cortex	-2.39681	Liver	0.179644	Ageing	-0.450469	0.179644	Down	Up	DownUp
ENSMUSG00000017868	Cortex	-0.554618	Liver	0.918956	Development	0.918956	0.586837	Up	Up	UpUp
ENSMUSG00000017868	Cortex	-0.554618	Liver	0.586837	Ageing	0.918956	0.586837	Up	Up	UpUp
ENSMUSG00000017950	Cortex	-0.820414	Liver	-0.846881	Development	-0.846881	-0.275454	Down	Down	DownDown
ENSMUSG00000017950	Cortex	-0.820414	Liver	-0.275454	Ageing	-0.846881	-0.275454	Down	Down	DownDown
ENSMUSG00000017307	Cortex	-0.22269	Liver	0.216225	Development	0.216225	0.0718576	Up	Up	UpUp
ENSMUSG00000017307	Cortex	-0.22269	Liver	0.0718576	Ageing	0.216225	0.0718576	Up	Up	UpUp
ENSMUSG00000018459	Cortex	0.0397295	Liver	-0.0180187	Development	-0.0180187	-0.0239525	Down	Down	DownDown
ENSMUSG00000018459	Cortex	0.0397295	Liver	-0.0239525	Ageing	-0.0180187	-0.0239525	Down	Down	DownDown
ENSMUSG00000027495	Cortex	-0.627634	Liver	-0.810844	Development	-0.810844	0.0239525	Down	Up	DownUp
ENSMUSG00000027495	Cortex	-0.627634	Liver	0.0239525	Ageing	-0.810844	0.0239525	Down	Up	DownUp
ENSMUSG00000027513	Cortex	-1.38081	Liver	-0.504525	Development	-0.504525	0.215573	Down	Up	DownUp
ENSMUSG00000027513	Cortex	-1.38081	Liver	0.215573	Ageing	-0.504525	0.215573	Down	Up	DownUp
ENSMUSG00000027514	Cortex	-1.69835	Liver	-0.0180187	Development	-0.0180187	0.179644	Down	Up	DownUp
ENSMUSG00000027514	Cortex	-1.69835	Liver	0.179644	Ageing	-0.0180187	0.179644	Down	Up	DownUp
ENSMUSG00000023393	Cortex	-2.04532	Liver	0.738769	Development	0.738769	0.682647	Up	Up	UpUp
ENSMUSG00000023393	Cortex	-2.04532	Liver	0.682647	Ageing	0.738769	0.682647	Up	Up	UpUp
ENSMUSG00000038751	Cortex	-1.21388	Liver	0.846881	Development	0.846881	-0.167668	Up	Down	UpDown
ENSMUSG00000038751	Cortex	-1.21388	Liver	-0.167668	Ageing	0.846881	-0.167668	Up	Down	UpDown
ENSMUSG00000058921	Cortex	-0.887918	Liver	-0.558581	Development	-0.558581	-0.179644	Down	Down	DownDown
ENSMUSG00000058921	Cortex	-0.887918	Liver	-0.179644	Ageing	-0.558581	-0.179644	Down	Down	DownDown
ENSMUSG00000003617	Cortex	-1.9186	Liver	0.360375	Development	0.360375	0.155691	Up	Up	UpUp
ENSMUSG00000003617	Cortex	-1.9186	Liver	0.155691	Ageing	0.360375	0.155691	Up	Up	UpUp
ENSMUSG00000102758	Cortex	-0.62788	Liver	0.450469	Development	0.450469	0.431145	Up	Up	UpUp
ENSMUSG00000102758	Cortex	-0.62788	Liver	0.431145	Ageing	0.450469	0.431145	Up	Up	UpUp
ENSMUSG00000027690	Cortex	-0.795835	Liver	-0.234244	Development	-0.234244	0.407193	Down	Up	DownUp
ENSMUSG00000027690	Cortex	-0.795835	Liver	0.407193	Ageing	-0.234244	0.407193	Down	Up	DownUp
ENSMUSG00000042997	Cortex	-1.17704	Liver	-0.882919	Development	-0.882919	-0.0718576	Down	Down	DownDown
ENSMUSG00000042997	Cortex	-1.17704	Liver	-0.0718576	Ageing	-0.882919	-0.0718576	Down	Down	DownDown
ENSMUSG00000027801	Cortex	-0.827618	Liver	-0.0180187	Development	-0.0180187	-0.311383	Down	Down	DownDown
ENSMUSG00000027801	Cortex	-0.827618	Liver	-0.311383	Ageing	-0.0180187	-0.311383	Down	Down	DownDown
ENSMUSG00000027761	Cortex	-0.952072	Liver	0.0360375	Development	0.0360375	-0.0119763	Up	Down	UpDown
ENSMUSG00000027761	Cortex	-0.952072	Liver	-0.0119763	Ageing	0.0360375	-0.0119763	Up	Down	UpDown
ENSMUSG00000027822	Cortex	-0.512956	Liver	0.684712	Development	0.684712	-0.143715	Up	Down	UpDown
ENSMUSG00000027822	Cortex	-0.512956	Liver	-0.143715	Ageing	0.684712	-0.143715	Up	Down	UpDown
ENSMUSG00000027792	Cortex	-1.08679	Liver	-0.0180187	Development	-0.0180187	0.838338	Down	Up	DownUp
ENSMUSG00000027792	Cortex	-1.08679	Liver	0.838338	Ageing	-0.0180187	0.838338	Down	Up	DownUp
ENSMUSG00000027809	Cortex	-1.74675	Liver	-0.270281	Development	-0.270281	-0.634742	Down	Down	DownDown
ENSMUSG00000027809	Cortex	-1.74675	Liver	-0.634742	Ageing	-0.270281	-0.634742	Down	Down	DownDown
ENSMUSG00000028011	Cortex	-0.597807	Liver	-0.846881	Development	-0.846881	-0.38324	Down	Down	DownDown
ENSMUSG00000028011	Cortex	-0.597807	Liver	-0.38324	Ageing	-0.846881	-0.38324	Down	Down	DownDown
ENSMUSG00000033831	Cortex	-0.868538	Liver	-0.2883	Development	-0.2883	0.407193	Down	Up	DownUp
ENSMUSG00000033831	Cortex	-0.868538	Liver	0.407193	Ageing	-0.2883	0.407193	Down	Up	DownUp
ENSMUSG00000028001	Cortex	-0.885956	Liver	-0.450469	Development	-0.450469	0.538932	Down	Up	DownUp
ENSMUSG00000028001	Cortex	-0.885956	Liver	0.538932	Ageing	-0.450469	0.538932	Down	Up	DownUp
ENSMUSG00000028003	Cortex	-1.17253	Liver	0.666694	Development	0.666694	-0.38324	Up	Down	UpDown
ENSMUSG00000028003	Cortex	-1.17253	Liver	-0.38324	Ageing	0.666694	-0.38324	Up	Down	UpDown
ENSMUSG00000033860	Cortex	-0.906624	Liver	0.198206	Development	0.198206	0.263478	Up	Up	UpUp
ENSMUSG00000033860	Cortex	-0.906624	Liver	0.263478	Ageing	0.198206	0.263478	Up	Up	UpUp
ENSMUSG00000028076	Cortex	-1.77714	Liver	-0.738769	Development	-0.738769	-0.335335	Down	Down	DownDown
ENSMUSG00000028076	Cortex	-1.77714	Liver	-0.335335	Ageing	-0.738769	-0.335335	Down	Down	DownDown
ENSMUSG00000015854	Cortex	-0.965102	Liver	-0.414431	Development	-0.414431	-0.778457	Down	Down	DownDown
ENSMUSG00000015854	Cortex	-0.965102	Liver	-0.778457	Ageing	-0.414431	-0.778457	Down	Down	DownDown
ENSMUSG00000104445	Cortex	-1.65281	Liver	-0.2883	Development	-0.2883	-0.0598813	Down	Down	DownDown
ENSMUSG00000104445	Cortex	-1.65281	Liver	-0.0598813	Ageing	-0.2883	-0.0598813	Down	Down	DownDown
ENSMUSG00000103766	Cortex	-0.903641	Liver	-0.504525	Development	-0.504525	-0.179644	Down	Down	DownDown
ENSMUSG00000103766	Cortex	-0.903641	Liver	-0.179644	Ageing	-0.504525	-0.179644	Down	Down	DownDown
ENSMUSG00000028064	Cortex	0.237129	Liver	0.828862	Development	0.828862	0.0479051	Up	Up	UpUp
ENSMUSG00000028064	Cortex	0.237129	Liver	0.0479051	Ageing	0.828862	0.0479051	Up	Up	UpUp
ENSMUSG00000041237	Cortex	-0.933781	Liver	-0.198206	Development	-0.198206	-0.550908	Down	Down	DownDown
ENSMUSG00000041237	Cortex	-0.933781	Liver	-0.550908	Ageing	-0.198206	-0.550908	Down	Down	DownDown
ENSMUSG00000068877	Cortex	-1.40564	Liver	0.0900937	Development	0.0900937	0.838338	Up	Up	UpUp
ENSMUSG00000068877	Cortex	-1.40564	Liver	0.838338	Ageing	0.0900937	0.838338	Up	Up	UpUp
ENSMUSG00000027944	Cortex	-1.32768	Liver	0.954994	Development	0.954994	0.143715	Up	Up	UpUp
ENSMUSG00000027944	Cortex	-1.32768	Liver	0.143715	Ageing	0.954994	0.143715	Up	Up	UpUp
ENSMUSG00000028088	Cortex	-1.27213	Liver	0.324337	Development	0.324337	0.910196	Up	Up	UpUp
ENSMUSG00000028088	Cortex	-1.27213	Liver	0.910196	Ageing	0.324337	0.910196	Up	Up	UpUp
ENSMUSG00000038304	Cortex	-0.77653	Liver	0.378394	Development	0.378394	0.143715	Up	Up	UpUp
ENSMUSG00000038304	Cortex	-0.77653	Liver	0.143715	Ageing	0.378394	0.143715	Up	Up	UpUp
ENSMUSG00000038298	Cortex	-0.825231	Liver	0.306319	Development	0.306319	-0.28743	Up	Down	UpDown
ENSMUSG00000038298	Cortex	-0.825231	Liver	-0.28743	Ageing	0.306319	-0.28743	Up	Down	UpDown
ENSMUSG00000027875	Cortex	-0.833166	Liver	-0.702731	Development	-0.702731	-0.0359288	Down	Down	DownDown
ENSMUSG00000027875	Cortex	-0.833166	Liver	-0.0359288	Ageing	-0.702731	-0.0359288	Down	Down	DownDown
ENSMUSG00000062410	Cortex	-0.76454	Liver	-0.180187	Development	-0.180187	0.0598813	Down	Up	DownUp
ENSMUSG00000062410	Cortex	-0.76454	Liver	0.0598813	Ageing	-0.180187	0.0598813	Down	Up	DownUp
ENSMUSG00000027865	Cortex	0.208971	Liver	0.666694	Development	0.666694	0.491027	Up	Up	UpUp
ENSMUSG00000027865	Cortex	0.208971	Liver	0.491027	Ageing	0.666694	0.491027	Up	Up	UpUp
ENSMUSG00000033147	Cortex	-0.431956	Liver	-0.954994	Development	-0.954994	0.443122	Down	Up	DownUp
ENSMUSG00000033147	Cortex	-0.431956	Liver	0.443122	Ageing	-0.954994	0.443122	Down	Up	DownUp
ENSMUSG00000027845	Cortex	-0.516432	Liver	-0.2883	Development	-0.2883	-0.503003	Down	Down	DownDown
ENSMUSG00000027845	Cortex	-0.516432	Liver	-0.503003	Ageing	-0.2883	-0.503003	Down	Down	DownDown
ENSMUSG00000002227	Cortex	-1.29883	Liver	0.738769	Development	0.738769	0.38324	Up	Up	UpUp
ENSMUSG00000002227	Cortex	-1.29883	Liver	0.38324	Ageing	0.738769	0.38324	Up	Up	UpUp
ENSMUSG00000070368	Cortex	-0.668735	Liver	-0.270281	Development	-0.270281	0.155691	Down	Up	DownUp
ENSMUSG00000070368	Cortex	-0.668735	Liver	0.155691	Ageing	-0.270281	0.155691	Down	Up	DownUp
ENSMUSG00000068762	Cortex	-0.661355	Liver	0.342356	Development	0.342356	0.335335	Up	Up	UpUp
ENSMUSG00000068762	Cortex	-0.661355	Liver	0.335335	Ageing	0.342356	0.335335	Up	Up	UpUp
ENSMUSG00000004035	Cortex	0.0326269	Liver	0.342356	Development	0.342356	0.730552	Up	Up	UpUp
ENSMUSG00000004035	Cortex	0.0326269	Liver	0.730552	Ageing	0.342356	0.730552	Up	Up	UpUp
ENSMUSG00000027890	Cortex	-1.19561	Liver	-0.14415	Development	-0.14415	0.0838338	Down	Up	DownUp
ENSMUSG00000027890	Cortex	-1.19561	Liver	0.0838338	Ageing	-0.14415	0.0838338	Down	Up	DownUp
ENSMUSG00000009108	Cortex	-0.848992	Liver	0.0180187	Development	0.0180187	-0.275454	Up	Down	UpDown
ENSMUSG00000009108	Cortex	-0.848992	Liver	-0.275454	Ageing	0.0180187	-0.275454	Up	Down	UpDown
ENSMUSG00000074264	Cortex	-0.0909955	Liver	0.14415	Development	0.14415	-0.227549	Up	Down	UpDown
ENSMUSG00000074264	Cortex	-0.0909955	Liver	-0.227549	Ageing	0.14415	-0.227549	Up	Down	UpDown
ENSMUSG00000000340	Cortex	-0.709119	Liver	0.306319	Development	0.306319	-0.514979	Up	Down	UpDown
ENSMUSG00000000340	Cortex	-0.709119	Liver	-0.514979	Ageing	0.306319	-0.514979	Up	Down	UpDown
ENSMUSG00000033386	Cortex	-1.43402	Liver	0.234244	Development	0.234244	-0.610789	Up	Down	UpDown
ENSMUSG00000033386	Cortex	-1.43402	Liver	-0.610789	Ageing	0.234244	-0.610789	Up	Down	UpDown
ENSMUSG00000033308	Cortex	-0.820618	Liver	-0.450469	Development	-0.450469	-0.203596	Down	Down	DownDown
ENSMUSG00000033308	Cortex	-0.820618	Liver	-0.203596	Ageing	-0.450469	-0.203596	Down	Down	DownDown
ENSMUSG00000028132	Cortex	-0.180796	Liver	0.846881	Development	0.846881	-0.0598813	Up	Down	UpDown
ENSMUSG00000028132	Cortex	-0.180796	Liver	-0.0598813	Ageing	0.846881	-0.0598813	Up	Down	UpDown
ENSMUSG00000028124	Cortex	-1.13451	Liver	0.594619	Development	0.594619	-0.562884	Up	Down	UpDown
ENSMUSG00000028124	Cortex	-1.13451	Liver	-0.562884	Ageing	0.594619	-0.562884	Up	Down	UpDown
ENSMUSG00000058952	Cortex	-0.860235	Liver	-0.1	Development	-0.1	0.155691	Down	Up	DownUp
ENSMUSG00000058952	Cortex	-0.860235	Liver	0.155691	Ageing	-0.1	0.155691	Down	Up	DownUp
ENSMUSG00000019232	Cortex	-0.26131	Liver	0.8649	Development	0.8649	0.143715	Up	Up	UpUp
ENSMUSG00000019232	Cortex	-0.26131	Liver	0.143715	Ageing	0.8649	0.143715	Up	Up	UpUp
ENSMUSG00000028158	Cortex	-0.597431	Liver	0.774806	Development	0.774806	-0.371264	Up	Down	UpDown
ENSMUSG00000028158	Cortex	-0.597431	Liver	-0.371264	Ageing	0.774806	-0.371264	Up	Down	UpDown
ENSMUSG00000028138	Cortex	-1.22749	Liver	-0.991031	Development	-0.991031	0.359288	Down	Up	DownUp
ENSMUSG00000028138	Cortex	-1.22749	Liver	0.359288	Ageing	-0.991031	0.359288	Down	Up	DownUp
ENSMUSG00000040213	Cortex	-1.10117	Liver	0.756787	Development	0.756787	-0.19162	Up	Down	UpDown
ENSMUSG00000040213	Cortex	-1.10117	Liver	-0.19162	Ageing	0.756787	-0.19162	Up	Down	UpDown
ENSMUSG00000028271	Cortex	-1.46976	Liver	0.756787	Development	0.756787	-0.550908	Up	Down	UpDown
ENSMUSG00000028271	Cortex	-1.46976	Liver	-0.550908	Ageing	0.756787	-0.550908	Up	Down	UpDown
ENSMUSG00000056025	Cortex	-1.16226	Liver	-0.468487	Development	-0.468487	-0.455098	Down	Down	DownDown
ENSMUSG00000056025	Cortex	-1.16226	Liver	-0.455098	Ageing	-0.468487	-0.455098	Down	Down	DownDown
ENSMUSG00000028189	Cortex	-2.12147	Liver	0.342356	Development	0.342356	0.0119763	Up	Up	UpUp
ENSMUSG00000028189	Cortex	-2.12147	Liver	0.0119763	Ageing	0.342356	0.0119763	Up	Up	UpUp
ENSMUSG00000028186	Cortex	-0.847269	Liver	-0.504525	Development	-0.504525	0.0359288	Down	Up	DownUp
ENSMUSG00000028186	Cortex	-0.847269	Liver	0.0359288	Ageing	-0.504525	0.0359288	Down	Up	DownUp
ENSMUSG00000028187	Cortex	-2.02826	Liver	-0.666694	Development	-0.666694	-0.203596	Down	Down	DownDown
ENSMUSG00000028187	Cortex	-2.02826	Liver	-0.203596	Ageing	-0.666694	-0.203596	Down	Down	DownDown
ENSMUSG00000028182	Cortex	-0.781023	Liver	0.270281	Development	0.270281	-0.886243	Up	Down	UpDown
ENSMUSG00000028182	Cortex	-0.781023	Liver	-0.886243	Ageing	0.270281	-0.886243	Up	Down	UpDown
ENSMUSG00000028199	Cortex	-0.698388	Liver	0.882919	Development	0.882919	0.754505	Up	Up	UpUp
ENSMUSG00000028199	Cortex	-0.698388	Liver	0.754505	Ageing	0.882919	0.754505	Up	Up	UpUp
ENSMUSG00000028179	Cortex	-0.899631	Liver	0.882919	Development	0.882919	-0.514979	Up	Down	UpDown
ENSMUSG00000028179	Cortex	-0.899631	Liver	-0.514979	Ageing	0.882919	-0.514979	Up	Down	UpDown
ENSMUSG00000028240	Cortex	-0.764166	Liver	0.900937	Development	0.900937	0.347312	Up	Up	UpUp
ENSMUSG00000028240	Cortex	-0.764166	Liver	0.347312	Ageing	0.900937	0.347312	Up	Up	UpUp
ENSMUSG00000073988	Cortex	-0.600881	Liver	0.414431	Development	0.414431	-0.622766	Up	Down	UpDown
ENSMUSG00000073988	Cortex	-0.600881	Liver	-0.622766	Ageing	0.414431	-0.622766	Up	Down	UpDown
ENSMUSG00000028251	Cortex	-0.0653378	Liver	0.936975	Development	0.936975	0.323359	Up	Up	UpUp
ENSMUSG00000028251	Cortex	-0.0653378	Liver	0.323359	Ageing	0.936975	0.323359	Up	Up	UpUp
ENSMUSG00000073910	Cortex	-1.06447	Liver	-0.684712	Development	-0.684712	-0.0838338	Down	Down	DownDown
ENSMUSG00000073910	Cortex	-1.06447	Liver	-0.0838338	Ageing	-0.684712	-0.0838338	Down	Down	DownDown
ENSMUSG00000028405	Cortex	-1.50744	Liver	-0.991031	Development	-0.991031	-0.538932	Down	Down	DownDown
ENSMUSG00000028405	Cortex	-1.50744	Liver	-0.538932	Ageing	-0.991031	-0.538932	Down	Down	DownDown
ENSMUSG00000061322	Cortex	-1.01436	Liver	0.810844	Development	0.810844	-0.514979	Up	Down	UpDown
ENSMUSG00000061322	Cortex	-1.01436	Liver	-0.514979	Ageing	0.810844	-0.514979	Up	Down	UpDown
ENSMUSG00000036078	Cortex	-0.132969	Liver	0.666694	Development	0.666694	-0.263478	Up	Down	UpDown
ENSMUSG00000036078	Cortex	-0.132969	Liver	-0.263478	Ageing	0.666694	-0.263478	Up	Down	UpDown
ENSMUSG00000028461	Cortex	-1.72247	Liver	0.342356	Development	0.342356	-0.395217	Up	Down	UpDown
ENSMUSG00000028461	Cortex	-1.72247	Liver	-0.395217	Ageing	0.342356	-0.395217	Up	Down	UpDown
ENSMUSG00000028479	Cortex	-0.765363	Liver	-0.324337	Development	-0.324337	0.0958101	Down	Up	DownUp
ENSMUSG00000028479	Cortex	-0.765363	Liver	0.0958101	Ageing	-0.324337	0.0958101	Down	Up	DownUp
ENSMUSG00000035637	Cortex	-1.44138	Liver	0.630656	Development	0.630656	0.419169	Up	Up	UpUp
ENSMUSG00000035637	Cortex	-1.44138	Liver	0.419169	Ageing	0.630656	0.419169	Up	Up	UpUp
ENSMUSG00000035561	Cortex	0.0128049	Liver	-0.846881	Development	-0.846881	-0.706599	Down	Down	DownDown
ENSMUSG00000035561	Cortex	0.0128049	Liver	-0.706599	Ageing	-0.846881	-0.706599	Down	Down	DownDown
ENSMUSG00000028327	Cortex	-0.788171	Liver	-0.774806	Development	-0.774806	-0.0119763	Down	Down	DownDown
ENSMUSG00000028327	Cortex	-0.788171	Liver	-0.0119763	Ageing	-0.774806	-0.0119763	Down	Down	DownDown
ENSMUSG00000039853	Cortex	-1.36335	Liver	-0.630656	Development	-0.630656	0.479051	Down	Up	DownUp
ENSMUSG00000039853	Cortex	-1.36335	Liver	0.479051	Ageing	-0.630656	0.479051	Down	Up	DownUp
ENSMUSG00000039653	Cortex	-0.764697	Liver	0.180187	Development	0.180187	-0.610789	Up	Down	UpDown
ENSMUSG00000039653	Cortex	-0.764697	Liver	-0.610789	Ageing	0.180187	-0.610789	Up	Down	UpDown
ENSMUSG00000028307	Cortex	-0.805828	Liver	0.126131	Development	0.126131	0.586837	Up	Up	UpUp
ENSMUSG00000028307	Cortex	-0.805828	Liver	0.586837	Ageing	0.126131	0.586837	Up	Up	UpUp
ENSMUSG00000015247	Cortex	-0.725939	Liver	-0.954994	Development	-0.954994	-0.119763	Down	Down	DownDown
ENSMUSG00000015247	Cortex	-0.725939	Liver	-0.119763	Ageing	-0.954994	-0.119763	Down	Down	DownDown
ENSMUSG00000015243	Cortex	-0.747604	Liver	-0.684712	Development	-0.684712	-0.251502	Down	Down	DownDown
ENSMUSG00000015243	Cortex	-0.747604	Liver	-0.251502	Ageing	-0.684712	-0.251502	Down	Down	DownDown
ENSMUSG00000052117	Cortex	-1.16711	Liver	0.756787	Development	0.756787	-0.379518	Up	Down	UpDown
ENSMUSG00000052117	Cortex	-1.16711	Liver	-0.379518	Ageing	0.756787	-0.379518	Up	Down	UpDown
ENSMUSG00000038578	Cortex	-0.508714	Liver	0.666694	Development	0.666694	0.227549	Up	Up	UpUp
ENSMUSG00000038578	Cortex	-0.508714	Liver	0.227549	Ageing	0.666694	0.227549	Up	Up	UpUp
ENSMUSG00000028383	Cortex	-1.24531	Liver	0.72075	Development	0.72075	0.0958101	Up	Up	UpUp
ENSMUSG00000028383	Cortex	-1.24531	Liver	0.0958101	Ageing	0.72075	0.0958101	Up	Up	UpUp
ENSMUSG00000038422	Cortex	-1.28818	Liver	0.900937	Development	0.900937	-0.0239525	Up	Down	UpDown
ENSMUSG00000038422	Cortex	-1.28818	Liver	-0.0239525	Ageing	0.900937	-0.0239525	Up	Down	UpDown
ENSMUSG00000066150	Cortex	-2.13896	Liver	-0.72075	Development	-0.72075	-0.311383	Down	Down	DownDown
ENSMUSG00000066150	Cortex	-2.13896	Liver	-0.311383	Ageing	-0.72075	-0.311383	Down	Down	DownDown
ENSMUSG00000028356	Cortex	-0.871752	Liver	-0.0900937	Development	-0.0900937	0.467074	Down	Up	DownUp
ENSMUSG00000028356	Cortex	-0.871752	Liver	0.467074	Ageing	-0.0900937	0.467074	Down	Up	DownUp
ENSMUSG00000028578	Cortex	-0.777875	Liver	0.2883	Development	0.2883	-0.646718	Up	Down	UpDown
ENSMUSG00000028578	Cortex	-0.777875	Liver	-0.646718	Ageing	0.2883	-0.646718	Up	Down	UpDown
ENSMUSG00000028573	Cortex	-0.847812	Liver	0.738769	Development	0.738769	-0.107786	Up	Down	UpDown
ENSMUSG00000028573	Cortex	-0.847812	Liver	-0.107786	Ageing	0.738769	-0.107786	Up	Down	UpDown
ENSMUSG00000052914	Cortex	-0.548273	Liver	0.774806	Development	0.774806	-0.143715	Up	Down	UpDown
ENSMUSG00000052914	Cortex	-0.548273	Liver	-0.143715	Ageing	0.774806	-0.143715	Up	Down	UpDown
ENSMUSG00000052520	Cortex	-0.805461	Liver	0.072075	Development	0.072075	0.0958101	Up	Up	UpUp
ENSMUSG00000052520	Cortex	-0.805461	Liver	0.0958101	Ageing	0.072075	0.0958101	Up	Up	UpUp
ENSMUSG00000028527	Cortex	0.122105	Liver	0.846881	Development	0.846881	-0.215573	Up	Down	UpDown
ENSMUSG00000028527	Cortex	0.122105	Liver	-0.215573	Ageing	0.846881	-0.215573	Up	Down	UpDown
ENSMUSG00000028553	Cortex	-0.79163	Liver	0.0360375	Development	0.0360375	-0.0359288	Up	Down	UpDown
ENSMUSG00000028553	Cortex	-0.79163	Liver	-0.0359288	Ageing	0.0360375	-0.0359288	Up	Down	UpDown
ENSMUSG00000028521	Cortex	-0.866949	Liver	0.108112	Development	0.108112	-0.562884	Up	Down	UpDown
ENSMUSG00000028521	Cortex	-0.866949	Liver	-0.562884	Ageing	0.108112	-0.562884	Up	Down	UpDown
ENSMUSG00000029656	Cortex	-0.816654	Liver	-0.738769	Development	-0.738769	-0.38324	Down	Down	DownDown
ENSMUSG00000029656	Cortex	-0.816654	Liver	-0.38324	Ageing	-0.738769	-0.38324	Down	Down	DownDown
ENSMUSG00000035031	Cortex	-0.817987	Liver	-0.270281	Development	-0.270281	-0.646718	Down	Down	DownDown
ENSMUSG00000035031	Cortex	-0.817987	Liver	-0.646718	Ageing	-0.270281	-0.646718	Down	Down	DownDown
ENSMUSG00000078612	Cortex	-0.456874	Liver	0.756787	Development	0.756787	0.167668	Up	Up	UpUp
ENSMUSG00000078612	Cortex	-0.456874	Liver	0.167668	Ageing	0.756787	0.167668	Up	Up	UpUp
ENSMUSG00000044254	Cortex	-0.241947	Liver	0.342356	Development	0.342356	0.239525	Up	Up	UpUp
ENSMUSG00000044254	Cortex	-0.241947	Liver	0.239525	Ageing	0.342356	0.239525	Up	Up	UpUp
ENSMUSG00000034926	Cortex	0.0573818	Liver	-0.666694	Development	-0.666694	0.431145	Down	Up	DownUp
ENSMUSG00000034926	Cortex	0.0573818	Liver	0.431145	Ageing	-0.666694	0.431145	Down	Up	DownUp
ENSMUSG00000034785	Cortex	-0.875825	Liver	0.234244	Development	0.234244	-0.431145	Up	Down	UpDown
ENSMUSG00000034785	Cortex	-0.875825	Liver	-0.431145	Ageing	0.234244	-0.431145	Up	Down	UpDown
ENSMUSG00000028601	Cortex	-1.60176	Liver	-0.486506	Development	-0.486506	0.359288	Down	Up	DownUp
ENSMUSG00000028601	Cortex	-1.60176	Liver	0.359288	Ageing	-0.486506	0.359288	Down	Up	DownUp
ENSMUSG00000028603	Cortex	-2.1034	Liver	0.936975	Development	0.936975	0.419169	Up	Up	UpUp
ENSMUSG00000028603	Cortex	-2.1034	Liver	0.419169	Ageing	0.936975	0.419169	Up	Up	UpUp
ENSMUSG00000028715	Cortex	-0.782293	Liver	-0.234244	Development	-0.234244	0.131739	Down	Up	DownUp
ENSMUSG00000028715	Cortex	-0.782293	Liver	0.131739	Ageing	-0.234244	0.131739	Down	Up	DownUp
ENSMUSG00000066072	Cortex	-0.814918	Liver	-0.612637	Development	-0.612637	0.598813	Down	Up	DownUp
ENSMUSG00000066072	Cortex	-0.814918	Liver	0.598813	Ageing	-0.612637	0.598813	Down	Up	DownUp
ENSMUSG00000028691	Cortex	-2.65772	Liver	-0.936975	Development	-0.936975	0.826362	Down	Up	DownUp
ENSMUSG00000028691	Cortex	-2.65772	Liver	0.826362	Ageing	-0.936975	0.826362	Down	Up	DownUp
ENSMUSG00000033985	Cortex	-0.886025	Liver	0.594619	Development	0.594619	0.574861	Up	Up	UpUp
ENSMUSG00000033985	Cortex	-0.886025	Liver	0.574861	Ageing	0.594619	0.574861	Up	Up	UpUp
ENSMUSG00000048772	Cortex	-2.49233	Liver	-0.504525	Development	-0.504525	0.514979	Down	Up	DownUp
ENSMUSG00000048772	Cortex	-2.49233	Liver	0.514979	Ageing	-0.504525	0.514979	Down	Up	DownUp
ENSMUSG00000078584	Cortex	0.0723301	Liver	0.252262	Development	0.252262	-0.155691	Up	Down	UpDown
ENSMUSG00000078584	Cortex	0.0723301	Liver	-0.155691	Ageing	0.252262	-0.155691	Up	Down	UpDown
ENSMUSG00000028636	Cortex	-2.41502	Liver	-0.072075	Development	-0.072075	0.491027	Down	Up	DownUp
ENSMUSG00000028636	Cortex	-2.41502	Liver	0.491027	Ageing	-0.072075	0.491027	Down	Up	DownUp
ENSMUSG00000062545	Cortex	-0.879486	Liver	-0.882919	Development	-0.882919	0.431145	Down	Up	DownUp
ENSMUSG00000062545	Cortex	-0.879486	Liver	0.431145	Ageing	-0.882919	0.431145	Down	Up	DownUp
ENSMUSG00000028792	Cortex	-2.27046	Liver	-0.666694	Development	-0.666694	-0.179644	Down	Down	DownDown
ENSMUSG00000028792	Cortex	-2.27046	Liver	-0.179644	Ageing	-0.666694	-0.179644	Down	Down	DownDown
ENSMUSG00000050493	Cortex	-1.80511	Liver	0.792825	Development	0.792825	-0.227549	Up	Down	UpDown
ENSMUSG00000050493	Cortex	-1.80511	Liver	-0.227549	Ageing	0.792825	-0.227549	Up	Down	UpDown
ENSMUSG00000037752	Cortex	-0.63505	Liver	0.270281	Development	0.270281	0.491027	Up	Up	UpUp
ENSMUSG00000037752	Cortex	-0.63505	Liver	0.491027	Ageing	0.270281	0.491027	Up	Up	UpUp
ENSMUSG00000037366	Cortex	-1.44781	Liver	-0.882919	Development	-0.882919	-0.622766	Down	Down	DownDown
ENSMUSG00000037366	Cortex	-1.44781	Liver	-0.622766	Ageing	-0.882919	-0.622766	Down	Down	DownDown
ENSMUSG00000037157	Cortex	-1.06552	Liver	-0.126131	Development	-0.126131	-0.550908	Down	Down	DownDown
ENSMUSG00000037157	Cortex	-1.06552	Liver	-0.550908	Ageing	-0.126131	-0.550908	Down	Down	DownDown
ENSMUSG00000028672	Cortex	-2.30763	Liver	0.5766	Development	0.5766	0.0838338	Up	Up	UpUp
ENSMUSG00000028672	Cortex	-2.30763	Liver	0.0838338	Ageing	0.5766	0.0838338	Up	Up	UpUp
ENSMUSG00000028755	Cortex	-1.54152	Liver	0.522544	Development	0.522544	0.0838338	Up	Up	UpUp
ENSMUSG00000028755	Cortex	-1.54152	Liver	0.0838338	Ageing	0.522544	0.0838338	Up	Up	UpUp
ENSMUSG00000028744	Cortex	-1.09771	Liver	0.738769	Development	0.738769	-0.0479051	Up	Down	UpDown
ENSMUSG00000028744	Cortex	-1.09771	Liver	-0.0479051	Ageing	0.738769	-0.0479051	Up	Down	UpDown
ENSMUSG00000028743	Cortex	-1.90564	Liver	0.663636	Development	0.663636	0.694623	Up	Up	UpUp
ENSMUSG00000028743	Cortex	-1.90564	Liver	0.694623	Ageing	0.663636	0.694623	Up	Up	UpUp
ENSMUSG00000078234	Cortex	-0.528237	Liver	0.810844	Development	0.810844	-0.28743	Up	Down	UpDown
ENSMUSG00000078234	Cortex	-0.528237	Liver	-0.28743	Ageing	0.810844	-0.28743	Up	Down	UpDown
ENSMUSG00000028737	Cortex	-1.36303	Liver	-0.612637	Development	-0.612637	0.778457	Down	Up	DownUp
ENSMUSG00000028737	Cortex	-1.36303	Liver	0.778457	Ageing	-0.612637	0.778457	Down	Up	DownUp
ENSMUSG00000043085	Cortex	-1.16563	Liver	0.540562	Development	0.540562	0.19162	Up	Up	UpUp
ENSMUSG00000043085	Cortex	-1.16563	Liver	0.19162	Ageing	0.540562	0.19162	Up	Up	UpUp
ENSMUSG00000040706	Cortex	-0.797371	Liver	0.900937	Development	0.900937	0.323359	Up	Up	UpUp
ENSMUSG00000040706	Cortex	-0.797371	Liver	0.323359	Ageing	0.900937	0.323359	Up	Up	UpUp
ENSMUSG00000078515	Cortex	-1.18094	Liver	0.072075	Development	0.072075	-0.778457	Up	Down	UpDown
ENSMUSG00000078515	Cortex	-1.18094	Liver	-0.778457	Ageing	0.072075	-0.778457	Up	Down	UpDown
ENSMUSG00000028975	Cortex	-0.40624	Liver	0.882919	Development	0.882919	0.455098	Up	Up	UpUp
ENSMUSG00000028975	Cortex	-0.40624	Liver	0.455098	Ageing	0.882919	0.455098	Up	Up	UpUp
ENSMUSG00000028979	Cortex	-0.63751	Liver	0.774806	Development	0.774806	-0.682647	Up	Down	UpDown
ENSMUSG00000028979	Cortex	-0.63751	Liver	-0.682647	Ageing	0.774806	-0.682647	Up	Down	UpDown
ENSMUSG00000028943	Cortex	-1.35768	Liver	0.882919	Development	0.882919	0.203596	Up	Up	UpUp
ENSMUSG00000028943	Cortex	-1.35768	Liver	0.203596	Ageing	0.882919	0.203596	Up	Up	UpUp
ENSMUSG00000015653	Cortex	-0.158201	Liver	0.774806	Development	0.774806	0.0359288	Up	Up	UpUp
ENSMUSG00000015653	Cortex	-0.158201	Liver	0.0359288	Ageing	0.774806	0.0359288	Up	Up	UpUp
ENSMUSG00000042476	Cortex	-1.01677	Liver	0.810844	Development	0.810844	0.107786	Up	Up	UpUp
ENSMUSG00000042476	Cortex	-1.01677	Liver	0.107786	Ageing	0.810844	0.107786	Up	Up	UpUp
ENSMUSG00000003623	Cortex	-1.43229	Liver	0.954994	Development	0.954994	0.0958101	Up	Up	UpUp
ENSMUSG00000003623	Cortex	-1.43229	Liver	0.0958101	Ageing	0.954994	0.0958101	Up	Up	UpUp
ENSMUSG00000029017	Cortex	-1.152	Liver	-0.270281	Development	-0.270281	-0.19162	Down	Down	DownDown
ENSMUSG00000029017	Cortex	-1.152	Liver	-0.19162	Ageing	-0.270281	-0.19162	Down	Down	DownDown
ENSMUSG00000029162	Cortex	-2.28278	Liver	0.882919	Development	0.882919	0.503003	Up	Up	UpUp
ENSMUSG00000029162	Cortex	-2.28278	Liver	0.503003	Ageing	0.882919	0.503003	Up	Up	UpUp
ENSMUSG00000059434	Cortex	-0.811133	Liver	0.810844	Development	0.810844	-0.119763	Up	Down	UpDown
ENSMUSG00000059434	Cortex	-0.811133	Liver	-0.119763	Ageing	0.810844	-0.119763	Up	Down	UpDown
ENSMUSG00000029136	Cortex	-1.44485	Liver	0.630656	Development	0.630656	0.874267	Up	Up	UpUp
ENSMUSG00000029136	Cortex	-1.44485	Liver	0.874267	Ageing	0.630656	0.874267	Up	Up	UpUp
ENSMUSG00000029102	Cortex	-0.937568	Liver	0.684712	Development	0.684712	-0.263478	Up	Down	UpDown
ENSMUSG00000029102	Cortex	-0.937568	Liver	-0.263478	Ageing	0.684712	-0.263478	Up	Down	UpDown
ENSMUSG00000005107	Cortex	-1.03618	Liver	-0.14415	Development	-0.14415	0.150602	Down	Up	DownUp
ENSMUSG00000005107	Cortex	-1.03618	Liver	0.150602	Ageing	-0.14415	0.150602	Down	Up	DownUp
ENSMUSG00000046985	Cortex	-0.467314	Liver	0.468487	Development	0.468487	-0.131739	Up	Down	UpDown
ENSMUSG00000046985	Cortex	-0.467314	Liver	-0.131739	Ageing	0.468487	-0.131739	Up	Down	UpDown
ENSMUSG00000039682	Cortex	-1.67495	Liver	0.450469	Development	0.450469	-0.179644	Up	Down	UpDown
ENSMUSG00000039682	Cortex	-1.67495	Liver	-0.179644	Ageing	0.450469	-0.179644	Up	Down	UpDown
ENSMUSG00000029173	Cortex	-1.28914	Liver	-0.0360375	Development	-0.0360375	-0.814386	Down	Down	DownDown
ENSMUSG00000029173	Cortex	-1.28914	Liver	-0.814386	Ageing	-0.0360375	-0.814386	Down	Down	DownDown
ENSMUSG00000060512	Cortex	-0.884806	Liver	0.630656	Development	0.630656	0.155691	Up	Up	UpUp
ENSMUSG00000060512	Cortex	-0.884806	Liver	0.155691	Ageing	0.630656	0.155691	Up	Up	UpUp
ENSMUSG00000029195	Cortex	-0.858191	Liver	0.396412	Development	0.396412	-0.299407	Up	Down	UpDown
ENSMUSG00000029195	Cortex	-0.858191	Liver	-0.299407	Ageing	0.396412	-0.299407	Up	Down	UpDown
ENSMUSG00000070780	Cortex	-1.56391	Liver	-0.378394	Development	-0.378394	-0.311383	Down	Down	DownDown
ENSMUSG00000070780	Cortex	-1.56391	Liver	-0.311383	Ageing	-0.378394	-0.311383	Down	Down	DownDown
ENSMUSG00000067219	Cortex	-1.17096	Liver	-0.414431	Development	-0.414431	-0.227549	Down	Down	DownDown
ENSMUSG00000067219	Cortex	-1.17096	Liver	-0.227549	Ageing	-0.414431	-0.227549	Down	Down	DownDown
ENSMUSG00000029217	Cortex	-1.67221	Liver	-0.828862	Development	-0.828862	-0.107786	Down	Down	DownDown
ENSMUSG00000029217	Cortex	-1.67221	Liver	-0.107786	Ageing	-0.828862	-0.107786	Down	Down	DownDown
ENSMUSG00000029246	Cortex	-0.716533	Liver	-0.43245	Development	-0.43245	-0.407193	Down	Down	DownDown
ENSMUSG00000029246	Cortex	-0.716533	Liver	-0.407193	Ageing	-0.43245	-0.407193	Down	Down	DownDown
ENSMUSG00000035836	Cortex	-0.793792	Liver	0.396412	Development	0.396412	0.313253	Up	Up	UpUp
ENSMUSG00000035836	Cortex	-0.793792	Liver	0.313253	Ageing	0.396412	0.313253	Up	Up	UpUp
ENSMUSG00000029260	Cortex	-0.803328	Liver	0.270281	Development	0.270281	0.263478	Up	Up	UpUp
ENSMUSG00000029260	Cortex	-0.803328	Liver	0.263478	Ageing	0.270281	0.263478	Up	Up	UpUp
ENSMUSG00000035811	Cortex	-0.796576	Liver	0.162169	Development	0.162169	0.299407	Up	Up	UpUp
ENSMUSG00000035811	Cortex	-0.796576	Liver	0.299407	Ageing	0.162169	0.299407	Up	Up	UpUp
ENSMUSG00000070704	Cortex	-0.832816	Liver	-0.360375	Development	-0.360375	-0.419169	Down	Down	DownDown
ENSMUSG00000070704	Cortex	-0.832816	Liver	-0.419169	Ageing	-0.360375	-0.419169	Down	Down	DownDown
ENSMUSG00000054630	Cortex	-0.830154	Liver	-0.342356	Development	-0.342356	0.107786	Down	Up	DownUp
ENSMUSG00000054630	Cortex	-0.830154	Liver	0.107786	Ageing	-0.342356	0.107786	Down	Up	DownUp
ENSMUSG00000029273	Cortex	-0.995485	Liver	0.198206	Development	0.198206	-0.0359288	Up	Down	UpDown
ENSMUSG00000029273	Cortex	-0.995485	Liver	-0.0359288	Ageing	0.198206	-0.0359288	Up	Down	UpDown
ENSMUSG00000035540	Cortex	-0.930227	Liver	0.486506	Development	0.486506	0.371264	Up	Up	UpUp
ENSMUSG00000035540	Cortex	-0.930227	Liver	0.371264	Ageing	0.486506	0.371264	Up	Up	UpUp
ENSMUSG00000029380	Cortex	-0.950747	Liver	-0.342356	Development	-0.342356	-0.227549	Down	Down	DownDown
ENSMUSG00000029380	Cortex	-0.950747	Liver	-0.227549	Ageing	-0.342356	-0.227549	Down	Down	DownDown
ENSMUSG00000029370	Cortex	-1.40706	Liver	0.414431	Development	0.414431	-0.335335	Up	Down	UpDown
ENSMUSG00000029370	Cortex	-1.40706	Liver	-0.335335	Ageing	0.414431	-0.335335	Up	Down	UpDown
ENSMUSG00000029369	Cortex	-0.845809	Liver	-0.236364	Development	-0.236364	0.323359	Down	Up	DownUp
ENSMUSG00000029369	Cortex	-0.845809	Liver	0.323359	Ageing	-0.236364	0.323359	Down	Up	DownUp
ENSMUSG00000070690	Cortex	-0.747905	Liver	-0.306319	Development	-0.306319	0.155691	Down	Up	DownUp
ENSMUSG00000070690	Cortex	-0.747905	Liver	0.155691	Ageing	-0.306319	0.155691	Down	Up	DownUp
ENSMUSG00000029417	Cortex	-1.11449	Liver	0.342356	Development	0.342356	0.443122	Up	Up	UpUp
ENSMUSG00000029417	Cortex	-1.11449	Liver	0.443122	Ageing	0.342356	0.443122	Up	Up	UpUp
ENSMUSG00000057068	Cortex	-1.19672	Liver	-0.648675	Development	-0.648675	0.275454	Down	Up	DownUp
ENSMUSG00000057068	Cortex	-1.19672	Liver	0.275454	Ageing	-0.648675	0.275454	Down	Up	DownUp
ENSMUSG00000034528	Cortex	-0.784338	Liver	-0.450469	Development	-0.450469	0.119763	Down	Up	DownUp
ENSMUSG00000034528	Cortex	-0.784338	Liver	0.119763	Ageing	-0.450469	0.119763	Down	Up	DownUp
ENSMUSG00000029299	Cortex	-1.65595	Liver	-0.14415	Development	-0.14415	0.514979	Down	Up	DownUp
ENSMUSG00000029299	Cortex	-1.65595	Liver	0.514979	Ageing	-0.14415	0.514979	Down	Up	DownUp
ENSMUSG00000079362	Cortex	-1.00304	Liver	0.2883	Development	0.2883	-0.347312	Up	Down	UpDown
ENSMUSG00000079362	Cortex	-1.00304	Liver	-0.347312	Ageing	0.2883	-0.347312	Up	Down	UpDown
ENSMUSG00000105096	Cortex	-0.9975	Liver	-0.792825	Development	-0.792825	-0.28743	Down	Down	DownDown
ENSMUSG00000105096	Cortex	-0.9975	Liver	-0.28743	Ageing	-0.792825	-0.28743	Down	Down	DownDown
ENSMUSG00000104713	Cortex	-1.52029	Liver	-0.774806	Development	-0.774806	0.730552	Down	Up	DownUp
ENSMUSG00000104713	Cortex	-1.52029	Liver	0.730552	Ageing	-0.774806	0.730552	Down	Up	DownUp
ENSMUSG00000034438	Cortex	-1.32899	Liver	-0.414431	Development	-0.414431	0.574861	Down	Up	DownUp
ENSMUSG00000034438	Cortex	-1.32899	Liver	0.574861	Ageing	-0.414431	0.574861	Down	Up	DownUp
ENSMUSG00000011831	Cortex	0.252421	Liver	0.126131	Development	0.126131	-0.371264	Up	Down	UpDown
ENSMUSG00000011831	Cortex	0.252421	Liver	-0.371264	Ageing	0.126131	-0.371264	Up	Down	UpDown
ENSMUSG00000046959	Cortex	-0.522611	Liver	-0.882919	Development	-0.882919	-0.526956	Down	Down	DownDown
ENSMUSG00000046959	Cortex	-0.522611	Liver	-0.526956	Ageing	-0.882919	-0.526956	Down	Down	DownDown
ENSMUSG00000029499	Cortex	-1.66659	Liver	0.810844	Development	0.810844	0.646718	Up	Up	UpUp
ENSMUSG00000029499	Cortex	-1.66659	Liver	0.646718	Ageing	0.810844	0.646718	Up	Up	UpUp
ENSMUSG00000044339	Cortex	-0.80728	Liver	-0.810844	Development	-0.810844	0.550908	Down	Up	DownUp
ENSMUSG00000044339	Cortex	-0.80728	Liver	0.550908	Ageing	-0.810844	0.550908	Down	Up	DownUp
ENSMUSG00000029556	Cortex	-0.768475	Liver	0.666694	Development	0.666694	-0.550908	Up	Down	UpDown
ENSMUSG00000029556	Cortex	-0.768475	Liver	-0.550908	Ageing	0.666694	-0.550908	Up	Down	UpDown
ENSMUSG00000029596	Cortex	-0.811447	Liver	0.810844	Development	0.810844	0.443122	Up	Up	UpUp
ENSMUSG00000029596	Cortex	-0.811447	Liver	0.443122	Ageing	0.810844	0.443122	Up	Up	UpUp
ENSMUSG00000029597	Cortex	-0.71476	Liver	0.882919	Development	0.882919	0.407193	Up	Up	UpUp
ENSMUSG00000029597	Cortex	-0.71476	Liver	0.407193	Ageing	0.882919	0.407193	Up	Up	UpUp
ENSMUSG00000066861	Cortex	-1.36967	Liver	-0.108112	Development	-0.108112	0.586837	Down	Up	DownUp
ENSMUSG00000066861	Cortex	-1.36967	Liver	0.586837	Ageing	-0.108112	0.586837	Down	Up	DownUp
ENSMUSG00000029456	Cortex	-1.4205	Liver	0.846881	Development	0.846881	0.28743	Up	Up	UpUp
ENSMUSG00000029456	Cortex	-1.4205	Liver	0.28743	Ageing	0.846881	0.28743	Up	Up	UpUp
ENSMUSG00000029440	Cortex	-1.30135	Liver	0.0900937	Development	0.0900937	-0.503003	Up	Down	UpDown
ENSMUSG00000029440	Cortex	-1.30135	Liver	-0.503003	Ageing	0.0900937	-0.503003	Up	Down	UpDown
ENSMUSG00000029445	Cortex	-0.864126	Liver	-0.0360375	Development	-0.0360375	-0.0479051	Down	Down	DownDown
ENSMUSG00000029445	Cortex	-0.864126	Liver	-0.0479051	Ageing	-0.0360375	-0.0479051	Down	Down	DownDown
ENSMUSG00000037936	Cortex	-1.5044	Liver	-0.774806	Development	-0.774806	0.275454	Down	Up	DownUp
ENSMUSG00000037936	Cortex	-1.5044	Liver	0.275454	Ageing	-0.774806	0.275454	Down	Up	DownUp
ENSMUSG00000025533	Cortex	-1.26045	Liver	0.0360375	Development	0.0360375	0.0119763	Up	Up	UpUp
ENSMUSG00000025533	Cortex	-1.26045	Liver	0.0119763	Ageing	0.0360375	0.0119763	Up	Up	UpUp
ENSMUSG00000005373	Cortex	-1.23517	Liver	0.882919	Development	0.882919	0.718576	Up	Up	UpUp
ENSMUSG00000005373	Cortex	-1.23517	Liver	0.718576	Ageing	0.882919	0.718576	Up	Up	UpUp
ENSMUSG00000005374	Cortex	-0.881771	Liver	0.594619	Development	0.594619	0.0359288	Up	Up	UpUp
ENSMUSG00000005374	Cortex	-0.881771	Liver	0.0359288	Ageing	0.594619	0.0359288	Up	Up	UpUp
ENSMUSG00000005378	Cortex	-0.461329	Liver	0.252262	Development	0.252262	0.131739	Up	Up	UpUp
ENSMUSG00000005378	Cortex	-0.461329	Liver	0.131739	Ageing	0.252262	0.131739	Up	Up	UpUp
ENSMUSG00000004814	Cortex	-1.40553	Liver	-0.522544	Development	-0.522544	-0.131739	Down	Down	DownDown
ENSMUSG00000004814	Cortex	-1.40553	Liver	-0.131739	Ageing	-0.522544	-0.131739	Down	Down	DownDown
ENSMUSG00000039886	Cortex	-0.826879	Liver	-0.666694	Development	-0.666694	0.227549	Down	Up	DownUp
ENSMUSG00000039886	Cortex	-0.826879	Liver	0.227549	Ageing	-0.666694	0.227549	Down	Up	DownUp
ENSMUSG00000029699	Cortex	-1.23375	Liver	-0.108112	Development	-0.108112	0.526956	Down	Up	DownUp
ENSMUSG00000029699	Cortex	-1.23375	Liver	0.526956	Ageing	-0.108112	0.526956	Down	Up	DownUp
ENSMUSG00000029716	Cortex	-0.312387	Liver	-0.558581	Development	-0.558581	0.299407	Down	Up	DownUp
ENSMUSG00000029716	Cortex	-0.312387	Liver	0.299407	Ageing	-0.558581	0.299407	Down	Up	DownUp
ENSMUSG00000029722	Cortex	0.279951	Liver	0.954994	Development	0.954994	0.790433	Up	Up	UpUp
ENSMUSG00000029722	Cortex	0.279951	Liver	0.790433	Ageing	0.954994	0.790433	Up	Up	UpUp
ENSMUSG00000037053	Cortex	-0.95543	Liver	-0.324337	Development	-0.324337	0.538932	Down	Up	DownUp
ENSMUSG00000037053	Cortex	-0.95543	Liver	0.538932	Ageing	-0.324337	0.538932	Down	Up	DownUp
ENSMUSG00000066684	Cortex	-2.04023	Liver	0.450469	Development	0.450469	-0.658694	Up	Down	UpDown
ENSMUSG00000066684	Cortex	-2.04023	Liver	-0.658694	Ageing	0.450469	-0.658694	Up	Down	UpDown
ENSMUSG00000029727	Cortex	-0.967726	Liver	0.846881	Development	0.846881	0.251502	Up	Up	UpUp
ENSMUSG00000029727	Cortex	-0.967726	Liver	0.251502	Ageing	0.846881	0.251502	Up	Up	UpUp
ENSMUSG00000036639	Cortex	-2.05945	Liver	-0.684712	Development	-0.684712	-0.323359	Down	Down	DownDown
ENSMUSG00000036639	Cortex	-2.05945	Liver	-0.323359	Ageing	-0.684712	-0.323359	Down	Down	DownDown
ENSMUSG00000054417	Cortex	-0.718562	Liver	0.558581	Development	0.558581	-0.443122	Up	Down	UpDown
ENSMUSG00000054417	Cortex	-0.718562	Liver	-0.443122	Ageing	0.558581	-0.443122	Up	Down	UpDown
ENSMUSG00000056035	Cortex	-0.832259	Liver	-0.954994	Development	-0.954994	0.251502	Down	Up	DownUp
ENSMUSG00000056035	Cortex	-0.832259	Liver	0.251502	Ageing	-0.954994	0.251502	Down	Up	DownUp
ENSMUSG00000029630	Cortex	-0.830764	Liver	-0.414431	Development	-0.414431	0.455098	Down	Up	DownUp
ENSMUSG00000029630	Cortex	-0.830764	Liver	0.455098	Ageing	-0.414431	0.455098	Down	Up	DownUp
ENSMUSG00000029664	Cortex	-1.35248	Liver	-0.108112	Development	-0.108112	0.131739	Down	Up	DownUp
ENSMUSG00000029664	Cortex	-1.35248	Liver	0.131739	Ageing	-0.108112	0.131739	Down	Up	DownUp
ENSMUSG00000002588	Cortex	-1.29494	Liver	-0.306319	Development	-0.306319	-0.19162	Down	Down	DownDown
ENSMUSG00000002588	Cortex	-1.29494	Liver	-0.19162	Ageing	-0.306319	-0.19162	Down	Down	DownDown
ENSMUSG00000015112	Cortex	-1.01066	Liver	-0.252262	Development	-0.252262	0.227549	Down	Up	DownUp
ENSMUSG00000015112	Cortex	-1.01066	Liver	0.227549	Ageing	-0.252262	0.227549	Down	Up	DownUp
ENSMUSG00000029553	Cortex	-2.0809	Liver	0.198206	Development	0.198206	0.0359288	Up	Up	UpUp
ENSMUSG00000029553	Cortex	-2.0809	Liver	0.0359288	Ageing	0.198206	0.0359288	Up	Up	UpUp
ENSMUSG00000029695	Cortex	-0.782472	Liver	0.936975	Development	0.936975	-0.526956	Up	Down	UpDown
ENSMUSG00000029695	Cortex	-0.782472	Liver	-0.526956	Ageing	0.936975	-0.526956	Up	Down	UpDown
ENSMUSG00000038641	Cortex	-0.802607	Liver	-0.270281	Development	-0.270281	-0.275454	Down	Down	DownDown
ENSMUSG00000038641	Cortex	-0.802607	Liver	-0.275454	Ageing	-0.270281	-0.275454	Down	Down	DownDown
ENSMUSG00000068587	Cortex	-0.881226	Liver	-0.504525	Development	-0.504525	-0.347312	Down	Down	DownDown
ENSMUSG00000068587	Cortex	-0.881226	Liver	-0.347312	Ageing	-0.504525	-0.347312	Down	Down	DownDown
ENSMUSG00000029735	Cortex	-1.40238	Liver	-0.684712	Development	-0.684712	-0.514979	Down	Down	DownDown
ENSMUSG00000029735	Cortex	-1.40238	Liver	-0.514979	Ageing	-0.684712	-0.514979	Down	Down	DownDown
ENSMUSG00000005225	Cortex	-0.419902	Liver	-0.72075	Development	-0.72075	-0.790433	Down	Down	DownDown
ENSMUSG00000005225	Cortex	-0.419902	Liver	-0.790433	Ageing	-0.72075	-0.790433	Down	Down	DownDown
ENSMUSG00000029802	Cortex	-2.2748	Liver	-0.72075	Development	-0.72075	-0.19162	Down	Down	DownDown
ENSMUSG00000029802	Cortex	-2.2748	Liver	-0.19162	Ageing	-0.72075	-0.19162	Down	Down	DownDown
ENSMUSG00000054422	Cortex	-1.06364	Liver	0.072075	Development	0.072075	0.550908	Up	Up	UpUp
ENSMUSG00000054422	Cortex	-1.06364	Liver	0.550908	Ageing	0.072075	0.550908	Up	Up	UpUp
ENSMUSG00000054474	Cortex	-1.65032	Liver	0	Development	0	0.933735	Down	Up	DownUp
ENSMUSG00000054474	Cortex	-1.65032	Liver	0.933735	Ageing	0	0.933735	Down	Up	DownUp
ENSMUSG00000056666	Cortex	-2.17028	Liver	0.882919	Development	0.882919	-0.347312	Up	Down	UpDown
ENSMUSG00000056666	Cortex	-2.17028	Liver	-0.347312	Ageing	0.882919	-0.347312	Up	Down	UpDown
ENSMUSG00000055912	Cortex	-1.5082	Liver	-0.828862	Development	-0.828862	0.778457	Down	Up	DownUp
ENSMUSG00000055912	Cortex	-1.5082	Liver	0.778457	Ageing	-0.828862	0.778457	Down	Up	DownUp
ENSMUSG00000035104	Cortex	-0.845481	Liver	0.954994	Development	0.954994	0.0598813	Up	Up	UpUp
ENSMUSG00000035104	Cortex	-0.845481	Liver	0.0598813	Ageing	0.954994	0.0598813	Up	Up	UpUp
ENSMUSG00000009145	Cortex	-1.25342	Liver	0.594619	Development	0.594619	0.227549	Up	Up	UpUp
ENSMUSG00000009145	Cortex	-1.25342	Liver	0.227549	Ageing	0.594619	0.227549	Up	Up	UpUp
ENSMUSG00000030036	Cortex	-1.70653	Liver	-0.846881	Development	-0.846881	0.131739	Down	Up	DownUp
ENSMUSG00000030036	Cortex	-1.70653	Liver	0.131739	Ageing	-0.846881	0.131739	Down	Up	DownUp
ENSMUSG00000014542	Cortex	-0.848689	Liver	-0.43245	Development	-0.43245	-0.131739	Down	Down	DownDown
ENSMUSG00000014542	Cortex	-0.848689	Liver	-0.131739	Ageing	-0.43245	-0.131739	Down	Down	DownDown
ENSMUSG00000033634	Cortex	-0.720716	Liver	0.0900937	Development	0.0900937	-0.407193	Up	Down	UpDown
ENSMUSG00000033634	Cortex	-0.720716	Liver	-0.407193	Ageing	0.0900937	-0.407193	Up	Down	UpDown
ENSMUSG00000057103	Cortex	-0.41612	Liver	0.900937	Development	0.900937	0.227549	Up	Up	UpUp
ENSMUSG00000057103	Cortex	-0.41612	Liver	0.227549	Ageing	0.900937	0.227549	Up	Up	UpUp
ENSMUSG00000029998	Cortex	-0.19254	Liver	0.108112	Development	0.108112	-0.0838338	Up	Down	UpDown
ENSMUSG00000029998	Cortex	-0.19254	Liver	-0.0838338	Ageing	0.108112	-0.0838338	Up	Down	UpDown
ENSMUSG00000030055	Cortex	-1.32999	Liver	-0.918956	Development	-0.918956	-0.251502	Down	Down	DownDown
ENSMUSG00000030055	Cortex	-1.32999	Liver	-0.251502	Ageing	-0.918956	-0.251502	Down	Down	DownDown
ENSMUSG00000033216	Cortex	-0.00572649	Liver	0.252262	Development	0.252262	-0.107786	Up	Down	UpDown
ENSMUSG00000033216	Cortex	-0.00572649	Liver	-0.107786	Ageing	0.252262	-0.107786	Up	Down	UpDown
ENSMUSG00000034456	Cortex	-0.808127	Liver	-0.14415	Development	-0.14415	0.19162	Down	Up	DownUp
ENSMUSG00000034456	Cortex	-0.808127	Liver	0.19162	Ageing	-0.14415	0.19162	Down	Up	DownUp
ENSMUSG00000030088	Cortex	0.218579	Liver	0.414431	Development	0.414431	-0.107786	Up	Down	UpDown
ENSMUSG00000030088	Cortex	0.218579	Liver	-0.107786	Ageing	0.414431	-0.107786	Up	Down	UpDown
ENSMUSG00000061838	Cortex	-2.35483	Liver	0.5766	Development	0.5766	0.311383	Up	Up	UpUp
ENSMUSG00000061838	Cortex	-2.35483	Liver	0.311383	Ageing	0.5766	0.311383	Up	Up	UpUp
ENSMUSG00000030104	Cortex	-1.29128	Liver	-0.738769	Development	-0.738769	-0.347312	Down	Down	DownDown
ENSMUSG00000030104	Cortex	-1.29128	Liver	-0.347312	Ageing	-0.738769	-0.347312	Down	Down	DownDown
ENSMUSG00000068011	Cortex	-0.712239	Liver	-0.0180187	Development	-0.0180187	-0.239525	Down	Down	DownDown
ENSMUSG00000068011	Cortex	-0.712239	Liver	-0.239525	Ageing	-0.0180187	-0.239525	Down	Down	DownDown
ENSMUSG00000042213	Cortex	-0.223085	Liver	-0.198206	Development	-0.198206	-0.610789	Down	Down	DownDown
ENSMUSG00000042213	Cortex	-0.223085	Liver	-0.610789	Ageing	-0.198206	-0.610789	Down	Down	DownDown
ENSMUSG00000071226	Cortex	-1.32652	Liver	-0.648675	Development	-0.648675	-0.0838338	Down	Down	DownDown
ENSMUSG00000071226	Cortex	-1.32652	Liver	-0.0838338	Ageing	-0.648675	-0.0838338	Down	Down	DownDown
ENSMUSG00000004446	Cortex	0.131471	Liver	-0.882919	Development	-0.882919	-0.80241	Down	Down	DownDown
ENSMUSG00000004446	Cortex	0.131471	Liver	-0.80241	Ageing	-0.882919	-0.80241	Down	Down	DownDown
ENSMUSG00000030109	Cortex	-0.618814	Liver	-0.172727	Development	-0.172727	-0.395217	Down	Down	DownDown
ENSMUSG00000030109	Cortex	-0.618814	Liver	-0.395217	Ageing	-0.172727	-0.395217	Down	Down	DownDown
ENSMUSG00000030108	Cortex	-0.253816	Liver	-0.846881	Development	-0.846881	-0.167668	Down	Down	DownDown
ENSMUSG00000030108	Cortex	-0.253816	Liver	-0.167668	Ageing	-0.846881	-0.167668	Down	Down	DownDown
ENSMUSG00000059908	Cortex	-0.807615	Liver	-0.14415	Development	-0.14415	0.0838338	Down	Up	DownUp
ENSMUSG00000059908	Cortex	-0.807615	Liver	0.0838338	Ageing	-0.14415	0.0838338	Down	Up	DownUp
ENSMUSG00000055172	Cortex	-2.81037	Liver	0.738769	Development	0.738769	0.682647	Up	Up	UpUp
ENSMUSG00000055172	Cortex	-2.81037	Liver	0.682647	Ageing	0.738769	0.682647	Up	Up	UpUp
ENSMUSG00000079343	Cortex	-0.858026	Liver	-0.666694	Development	-0.666694	-0.574861	Down	Down	DownDown
ENSMUSG00000079343	Cortex	-0.858026	Liver	-0.574861	Ageing	-0.666694	-0.574861	Down	Down	DownDown
ENSMUSG00000098470	Cortex	-0.996534	Liver	0.612637	Development	0.612637	0.251502	Up	Up	UpUp
ENSMUSG00000098470	Cortex	-0.996534	Liver	0.251502	Ageing	0.612637	0.251502	Up	Up	UpUp
ENSMUSG00000038527	Cortex	-1.12049	Liver	-0.558581	Development	-0.558581	0.131739	Down	Up	DownUp
ENSMUSG00000038527	Cortex	-1.12049	Liver	0.131739	Ageing	-0.558581	0.131739	Down	Up	DownUp
ENSMUSG00000005069	Cortex	-0.254813	Liver	-0.684712	Development	-0.684712	-0.850315	Down	Down	DownDown
ENSMUSG00000005069	Cortex	-0.254813	Liver	-0.850315	Ageing	-0.684712	-0.850315	Down	Down	DownDown
ENSMUSG00000038167	Cortex	-1.38183	Liver	-0.0180187	Development	-0.0180187	0.167668	Down	Up	DownUp
ENSMUSG00000038167	Cortex	-1.38183	Liver	0.167668	Ageing	-0.0180187	0.167668	Down	Up	DownUp
ENSMUSG00000047228	Cortex	-0.00415293	Liver	0.846881	Development	0.846881	0.395217	Up	Up	UpUp
ENSMUSG00000047228	Cortex	-0.00415293	Liver	0.395217	Ageing	0.846881	0.395217	Up	Up	UpUp
ENSMUSG00000030359	Cortex	-0.856845	Liver	-0.2883	Development	-0.2883	0.682647	Down	Up	DownUp
ENSMUSG00000030359	Cortex	-0.856845	Liver	0.682647	Ageing	-0.2883	0.682647	Down	Up	DownUp
ENSMUSG00000030159	Cortex	-1.43591	Liver	-0.0900937	Development	-0.0900937	0.204819	Down	Up	DownUp
ENSMUSG00000030159	Cortex	-1.43591	Liver	0.204819	Ageing	-0.0900937	0.204819	Down	Up	DownUp
ENSMUSG00000042770	Cortex	-0.673031	Liver	0.954994	Development	0.954994	0.347312	Up	Up	UpUp
ENSMUSG00000042770	Cortex	-0.673031	Liver	0.347312	Ageing	0.954994	0.347312	Up	Up	UpUp
ENSMUSG00000042638	Cortex	-0.619587	Liver	0.486506	Development	0.486506	0.155691	Up	Up	UpUp
ENSMUSG00000042638	Cortex	-0.619587	Liver	0.155691	Ageing	0.486506	0.155691	Up	Up	UpUp
ENSMUSG00000030225	Cortex	-2.81205	Liver	-0.702731	Development	-0.702731	-0.311383	Down	Down	DownDown
ENSMUSG00000030225	Cortex	-2.81205	Liver	-0.311383	Ageing	-0.702731	-0.311383	Down	Down	DownDown
ENSMUSG00000030236	Cortex	-0.782862	Liver	0.450469	Development	0.450469	-0.275454	Up	Down	UpDown
ENSMUSG00000030236	Cortex	-0.782862	Liver	-0.275454	Ageing	0.450469	-0.275454	Up	Down	UpDown
ENSMUSG00000030244	Cortex	-0.857982	Liver	-0.306319	Development	-0.306319	0.251502	Down	Up	DownUp
ENSMUSG00000030244	Cortex	-0.857982	Liver	0.251502	Ageing	-0.306319	0.251502	Down	Up	DownUp
ENSMUSG00000030287	Cortex	-0.498881	Liver	0.738769	Development	0.738769	0.706599	Up	Up	UpUp
ENSMUSG00000030287	Cortex	-0.498881	Liver	0.706599	Ageing	0.738769	0.706599	Up	Up	UpUp
ENSMUSG00000078817	Cortex	-0.789471	Liver	0.270281	Development	0.270281	0.0119763	Up	Up	UpUp
ENSMUSG00000078817	Cortex	-0.789471	Liver	0.0119763	Ageing	0.270281	0.0119763	Up	Up	UpUp
ENSMUSG00000070873	Cortex	-1.22815	Liver	0.558581	Development	0.558581	-0.0119763	Up	Down	UpDown
ENSMUSG00000070873	Cortex	-1.22815	Liver	-0.0119763	Ageing	0.558581	-0.0119763	Up	Down	UpDown
ENSMUSG00000045282	Cortex	-0.652528	Liver	0.378394	Development	0.378394	-0.347312	Up	Down	UpDown
ENSMUSG00000045282	Cortex	-0.652528	Liver	-0.347312	Ageing	0.378394	-0.347312	Up	Down	UpDown
ENSMUSG00000086784	Cortex	-1.69301	Liver	0.756787	Development	0.756787	0.790433	Up	Up	UpUp
ENSMUSG00000086784	Cortex	-1.69301	Liver	0.790433	Ageing	0.756787	0.790433	Up	Up	UpUp
ENSMUSG00000030382	Cortex	-0.809643	Liver	-0.630656	Development	-0.630656	-0.311383	Down	Down	DownDown
ENSMUSG00000030382	Cortex	-0.809643	Liver	-0.311383	Ageing	-0.630656	-0.311383	Down	Down	DownDown
ENSMUSG00000078798	Cortex	-0.621063	Liver	-0.14415	Development	-0.14415	-0.0239525	Down	Down	DownDown
ENSMUSG00000078798	Cortex	-0.621063	Liver	-0.0239525	Ageing	-0.14415	-0.0239525	Down	Down	DownDown
ENSMUSG00000030378	Cortex	-0.761189	Liver	-0.252262	Development	-0.252262	0.227549	Down	Up	DownUp
ENSMUSG00000030378	Cortex	-0.761189	Liver	0.227549	Ageing	-0.252262	0.227549	Down	Up	DownUp
ENSMUSG00000040891	Cortex	-0.89531	Liver	0.108112	Development	0.108112	0.0119763	Up	Up	UpUp
ENSMUSG00000040891	Cortex	-0.89531	Liver	0.0119763	Ageing	0.108112	0.0119763	Up	Up	UpUp
ENSMUSG00000040564	Cortex	-1.78669	Liver	0.198206	Development	0.198206	0.503003	Up	Up	UpUp
ENSMUSG00000040564	Cortex	-1.78669	Liver	0.503003	Ageing	0.198206	0.503003	Up	Up	UpUp
ENSMUSG00000002992	Cortex	-1.02455	Liver	0.162169	Development	0.162169	-0.0838338	Up	Down	UpDown
ENSMUSG00000002992	Cortex	-1.02455	Liver	-0.0838338	Ageing	0.162169	-0.0838338	Up	Down	UpDown
ENSMUSG00000109350	Cortex	-0.797001	Liver	0.216225	Development	0.216225	0.275454	Up	Up	UpUp
ENSMUSG00000109350	Cortex	-0.797001	Liver	0.275454	Ageing	0.216225	0.275454	Up	Up	UpUp
ENSMUSG00000074336	Cortex	-0.872189	Liver	-0.0180187	Development	-0.0180187	0.167668	Down	Up	DownUp
ENSMUSG00000074336	Cortex	-0.872189	Liver	0.167668	Ageing	-0.0180187	0.167668	Down	Up	DownUp
ENSMUSG00000002985	Cortex	0.0709722	Liver	0.872727	Development	0.872727	-0.0251816	Up	Down	UpDown
ENSMUSG00000002985	Cortex	0.0709722	Liver	-0.0251816	Ageing	0.872727	-0.0251816	Up	Down	UpDown
ENSMUSG00000064254	Cortex	-0.886825	Liver	-0.486506	Development	-0.486506	0.826362	Down	Up	DownUp
ENSMUSG00000064254	Cortex	-0.886825	Liver	0.826362	Ageing	-0.486506	0.826362	Down	Up	DownUp
ENSMUSG00000054385	Cortex	-0.963119	Liver	0.666694	Development	0.666694	-0.131739	Up	Down	UpDown
ENSMUSG00000054385	Cortex	-0.963119	Liver	-0.131739	Ageing	0.666694	-0.131739	Up	Down	UpDown
ENSMUSG00000040660	Cortex	-0.675555	Liver	0.0540562	Development	0.0540562	-0.0119763	Up	Down	UpDown
ENSMUSG00000040660	Cortex	-0.675555	Liver	-0.0119763	Ageing	0.0540562	-0.0119763	Up	Down	UpDown
ENSMUSG00000074254	Cortex	-0.863873	Liver	-0.414431	Development	-0.414431	0	Down	Down	DownDown
ENSMUSG00000074254	Cortex	-0.863873	Liver	0	Ageing	-0.414431	0	Down	Down	DownDown
ENSMUSG00000060407	Cortex	-0.834269	Liver	-0.306319	Development	-0.306319	0.155691	Down	Up	DownUp
ENSMUSG00000060407	Cortex	-0.834269	Liver	0.155691	Ageing	-0.306319	0.155691	Down	Up	DownUp
ENSMUSG00000091867	Cortex	-0.705526	Liver	-0.270281	Development	-0.270281	0.0119763	Down	Up	DownUp
ENSMUSG00000091867	Cortex	-0.705526	Liver	0.0119763	Ageing	-0.270281	0.0119763	Down	Up	DownUp
ENSMUSG00000003762	Cortex	-0.887493	Liver	0.936975	Development	0.936975	-0.514979	Up	Down	UpDown
ENSMUSG00000003762	Cortex	-0.887493	Liver	-0.514979	Ageing	0.936975	-0.514979	Up	Down	UpDown
ENSMUSG00000036892	Cortex	-0.775194	Liver	0.0540562	Development	0.0540562	0	Up	Down	UpDown
ENSMUSG00000036892	Cortex	-0.775194	Liver	0	Ageing	0.0540562	0	Up	Down	UpDown
ENSMUSG00000046826	Cortex	-1.34683	Liver	0.0180187	Development	0.0180187	-0.38324	Up	Down	UpDown
ENSMUSG00000046826	Cortex	-1.34683	Liver	-0.38324	Ageing	0.0180187	-0.38324	Up	Down	UpDown
ENSMUSG00000001249	Cortex	-1.43863	Liver	0.810844	Development	0.810844	0.28743	Up	Up	UpUp
ENSMUSG00000001249	Cortex	-1.43863	Liver	0.28743	Ageing	0.810844	0.28743	Up	Up	UpUp
ENSMUSG00000050440	Cortex	-0.892504	Liver	-0.612637	Development	-0.612637	0.395217	Down	Up	DownUp
ENSMUSG00000050440	Cortex	-0.892504	Liver	0.395217	Ageing	-0.612637	0.395217	Down	Up	DownUp
ENSMUSG00000030494	Cortex	-1.14269	Liver	0.702731	Development	0.702731	0.0838338	Up	Up	UpUp
ENSMUSG00000030494	Cortex	-1.14269	Liver	0.0838338	Ageing	0.702731	0.0838338	Up	Up	UpUp
ENSMUSG00000054676	Cortex	-1.07066	Liver	0.991031	Development	0.991031	-0.323359	Up	Down	UpDown
ENSMUSG00000054676	Cortex	-1.07066	Liver	-0.323359	Ageing	0.991031	-0.323359	Up	Down	UpDown
ENSMUSG00000030474	Cortex	-1.52601	Liver	0.954994	Development	0.954994	0.395217	Up	Up	UpUp
ENSMUSG00000030474	Cortex	-1.52601	Liver	0.395217	Ageing	0.954994	0.395217	Up	Up	UpUp
ENSMUSG00000038704	Cortex	-0.0821076	Liver	-0.594619	Development	-0.594619	-0.586837	Down	Down	DownDown
ENSMUSG00000038704	Cortex	-0.0821076	Liver	-0.586837	Ageing	-0.594619	-0.586837	Down	Down	DownDown
ENSMUSG00000038539	Cortex	-2.56077	Liver	0.486506	Development	0.486506	0.0598813	Up	Up	UpUp
ENSMUSG00000038539	Cortex	-2.56077	Liver	0.0598813	Ageing	0.486506	0.0598813	Up	Up	UpUp
ENSMUSG00000057342	Cortex	-1.47272	Liver	0.882919	Development	0.882919	-0.131739	Up	Down	UpDown
ENSMUSG00000057342	Cortex	-1.47272	Liver	-0.131739	Ageing	0.882919	-0.131739	Up	Down	UpDown
ENSMUSG00000011382	Cortex	-0.94263	Liver	0.882919	Development	0.882919	0.694623	Up	Up	UpUp
ENSMUSG00000011382	Cortex	-0.94263	Liver	0.694623	Ageing	0.882919	0.694623	Up	Up	UpUp
ENSMUSG00000030834	Cortex	-0.784915	Liver	-0.666694	Development	-0.666694	-0.359288	Down	Down	DownDown
ENSMUSG00000030834	Cortex	-0.784915	Liver	-0.359288	Ageing	-0.666694	-0.359288	Down	Down	DownDown
ENSMUSG00000040017	Cortex	-0.830163	Liver	-0.450469	Development	-0.450469	-0.550908	Down	Down	DownDown
ENSMUSG00000040017	Cortex	-0.830163	Liver	-0.550908	Ageing	-0.450469	-0.550908	Down	Down	DownDown
ENSMUSG00000039745	Cortex	-1.85691	Liver	0.882919	Development	0.882919	0.299407	Up	Up	UpUp
ENSMUSG00000039745	Cortex	-1.85691	Liver	0.299407	Ageing	0.882919	0.299407	Up	Up	UpUp
ENSMUSG00000074071	Cortex	-1.11739	Liver	0.738769	Development	0.738769	-0.89822	Up	Down	UpDown
ENSMUSG00000074071	Cortex	-1.11739	Liver	-0.89822	Ageing	0.738769	-0.89822	Up	Down	UpDown
ENSMUSG00000032776	Cortex	-0.621597	Liver	-0.180187	Development	-0.180187	-0.634742	Down	Down	DownDown
ENSMUSG00000032776	Cortex	-0.621597	Liver	-0.634742	Ageing	-0.180187	-0.634742	Down	Down	DownDown
ENSMUSG00000045795	Cortex	-1.1683	Liver	0.648675	Development	0.648675	0.419169	Up	Up	UpUp
ENSMUSG00000045795	Cortex	-1.1683	Liver	0.419169	Ageing	0.648675	0.419169	Up	Up	UpUp
ENSMUSG00000046027	Cortex	-1.87308	Liver	0.540562	Development	0.540562	0.203596	Up	Up	UpUp
ENSMUSG00000046027	Cortex	-1.87308	Liver	0.203596	Ageing	0.540562	0.203596	Up	Up	UpUp
ENSMUSG00000030630	Cortex	-0.857239	Liver	0.774806	Development	0.774806	0.682647	Up	Up	UpUp
ENSMUSG00000030630	Cortex	-0.857239	Liver	0.682647	Ageing	0.774806	0.682647	Up	Up	UpUp
ENSMUSG00000042797	Cortex	0.324569	Liver	0.522544	Development	0.522544	0.227549	Up	Up	UpUp
ENSMUSG00000042797	Cortex	0.324569	Liver	0.227549	Ageing	0.522544	0.227549	Up	Up	UpUp
ENSMUSG00000030688	Cortex	-1.40129	Liver	0.882919	Development	0.882919	0.718576	Up	Up	UpUp
ENSMUSG00000030688	Cortex	-1.40129	Liver	0.718576	Ageing	0.882919	0.718576	Up	Up	UpUp
ENSMUSG00000070427	Cortex	-0.507422	Liver	-0.594619	Development	-0.594619	0.0479051	Down	Up	DownUp
ENSMUSG00000070427	Cortex	-0.507422	Liver	0.0479051	Ageing	-0.594619	0.0479051	Down	Up	DownUp
ENSMUSG00000030895	Cortex	-0.985413	Liver	-0.162169	Development	-0.162169	0.574861	Down	Up	DownUp
ENSMUSG00000030895	Cortex	-0.985413	Liver	0.574861	Ageing	-0.162169	0.574861	Down	Up	DownUp
ENSMUSG00000030671	Cortex	-0.950365	Liver	-0.8649	Development	-0.8649	0.0119763	Down	Up	DownUp
ENSMUSG00000030671	Cortex	-0.950365	Liver	0.0119763	Ageing	-0.8649	0.0119763	Down	Up	DownUp
ENSMUSG00000030670	Cortex	-0.702769	Liver	-0.702731	Development	-0.702731	-0.0239525	Down	Down	DownDown
ENSMUSG00000030670	Cortex	-0.702769	Liver	-0.0239525	Ageing	-0.702731	-0.0239525	Down	Down	DownDown
ENSMUSG00000048782	Cortex	-1.11525	Liver	0.810844	Development	0.810844	0.89822	Up	Up	UpUp
ENSMUSG00000048782	Cortex	-1.11525	Liver	0.89822	Ageing	0.810844	0.89822	Up	Up	UpUp
ENSMUSG00000033533	Cortex	-1.12243	Liver	0.360375	Development	0.360375	-0.0598813	Up	Down	UpDown
ENSMUSG00000033533	Cortex	-1.12243	Liver	-0.0598813	Ageing	0.360375	-0.0598813	Up	Down	UpDown
ENSMUSG00000030972	Cortex	-0.730914	Liver	0.648675	Development	0.648675	-0.203596	Up	Down	UpDown
ENSMUSG00000030972	Cortex	-0.730914	Liver	-0.203596	Ageing	0.648675	-0.203596	Up	Down	UpDown
ENSMUSG00000030909	Cortex	-0.774091	Liver	0.162169	Development	0.162169	-0.395217	Up	Down	UpDown
ENSMUSG00000030909	Cortex	-0.774091	Liver	-0.395217	Ageing	0.162169	-0.395217	Up	Down	UpDown
ENSMUSG00000030935	Cortex	-1.04385	Liver	0.216225	Development	0.216225	0.263478	Up	Up	UpUp
ENSMUSG00000030935	Cortex	-1.04385	Liver	0.263478	Ageing	0.216225	0.263478	Up	Up	UpUp
ENSMUSG00000030762	Cortex	-0.831092	Liver	0.216225	Development	0.216225	-0.598813	Up	Down	UpDown
ENSMUSG00000030762	Cortex	-0.831092	Liver	-0.598813	Ageing	0.216225	-0.598813	Up	Down	UpDown
ENSMUSG00000030711	Cortex	-1.62869	Liver	0.846881	Development	0.846881	-0.0479051	Up	Down	UpDown
ENSMUSG00000030711	Cortex	-1.62869	Liver	-0.0479051	Ageing	0.846881	-0.0479051	Up	Down	UpDown
ENSMUSG00000030674	Cortex	-1.00836	Liver	-0.540562	Development	-0.540562	0.0598813	Down	Up	DownUp
ENSMUSG00000030674	Cortex	-1.00836	Liver	0.0598813	Ageing	-0.540562	0.0598813	Down	Up	DownUp
ENSMUSG00000049091	Cortex	-0.89808	Liver	0.252262	Development	0.252262	0.0718576	Up	Up	UpUp
ENSMUSG00000049091	Cortex	-0.89808	Liver	0.0718576	Ageing	0.252262	0.0718576	Up	Up	UpUp
ENSMUSG00000042289	Cortex	-3.02522	Liver	0.5766	Development	0.5766	-0.0838338	Up	Down	UpDown
ENSMUSG00000042289	Cortex	-3.02522	Liver	-0.0838338	Ageing	0.5766	-0.0838338	Up	Down	UpDown
ENSMUSG00000054612	Cortex	-1.44854	Liver	0	Development	0	-0.19162	Down	Down	DownDown
ENSMUSG00000054612	Cortex	-1.44854	Liver	-0.19162	Ageing	0	-0.19162	Down	Down	DownDown
ENSMUSG00000025479	Cortex	-1.1789	Liver	-0.0180187	Development	-0.0180187	0.550908	Down	Up	DownUp
ENSMUSG00000025479	Cortex	-1.1789	Liver	0.550908	Ageing	-0.0180187	0.550908	Down	Up	DownUp
ENSMUSG00000038745	Cortex	-0.718855	Liver	-0.108112	Development	-0.108112	0.179644	Down	Up	DownUp
ENSMUSG00000038745	Cortex	-0.718855	Liver	0.179644	Ageing	-0.108112	0.179644	Down	Up	DownUp
ENSMUSG00000025497	Cortex	-0.869959	Liver	0.360375	Development	0.360375	0.275454	Up	Up	UpUp
ENSMUSG00000025497	Cortex	-0.869959	Liver	0.275454	Ageing	0.360375	0.275454	Up	Up	UpUp
ENSMUSG00000025481	Cortex	-1.48658	Liver	0.306319	Development	0.306319	0.155691	Up	Up	UpUp
ENSMUSG00000025481	Cortex	-1.48658	Liver	0.155691	Ageing	0.306319	0.155691	Up	Up	UpUp
ENSMUSG00000000154	Cortex	-1.29646	Liver	-0.324337	Development	-0.324337	-0.0479051	Down	Down	DownDown
ENSMUSG00000000154	Cortex	-1.29646	Liver	-0.0479051	Ageing	-0.324337	-0.0479051	Down	Down	DownDown
ENSMUSG00000031090	Cortex	-1.29051	Liver	0.666694	Development	0.666694	0.0239525	Up	Up	UpUp
ENSMUSG00000031090	Cortex	-1.29051	Liver	0.0239525	Ageing	0.666694	0.0239525	Up	Up	UpUp
ENSMUSG00000069633	Cortex	-1.47317	Liver	-0.666694	Development	-0.666694	0.0958101	Down	Up	DownUp
ENSMUSG00000069633	Cortex	-1.47317	Liver	0.0958101	Ageing	-0.666694	0.0958101	Down	Up	DownUp
ENSMUSG00000065952	Cortex	-0.988885	Liver	-0.162169	Development	-0.162169	-0.203596	Down	Down	DownDown
ENSMUSG00000065952	Cortex	-0.988885	Liver	-0.203596	Ageing	-0.162169	-0.203596	Down	Down	DownDown
ENSMUSG00000074491	Cortex	-0.888353	Liver	0.0360375	Development	0.0360375	-0.275454	Up	Down	UpDown
ENSMUSG00000074491	Cortex	-0.888353	Liver	-0.275454	Ageing	0.0360375	-0.275454	Up	Down	UpDown
ENSMUSG00000031443	Cortex	-1.27135	Liver	-0.108112	Development	-0.108112	-0.28743	Down	Down	DownDown
ENSMUSG00000031443	Cortex	-1.27135	Liver	-0.28743	Ageing	-0.108112	-0.28743	Down	Down	DownDown
ENSMUSG00000031444	Cortex	-1.12922	Liver	0.0360375	Development	0.0360375	0.38324	Up	Up	UpUp
ENSMUSG00000031444	Cortex	-1.12922	Liver	0.38324	Ageing	0.0360375	0.38324	Up	Up	UpUp
ENSMUSG00000031445	Cortex	-0.456773	Liver	0.72075	Development	0.72075	-0.479051	Up	Down	UpDown
ENSMUSG00000031445	Cortex	-0.456773	Liver	-0.479051	Ageing	0.72075	-0.479051	Up	Down	UpDown
ENSMUSG00000038515	Cortex	-1.10984	Liver	-0.900937	Development	-0.900937	0.0838338	Down	Up	DownUp
ENSMUSG00000038515	Cortex	-1.10984	Liver	0.0838338	Ageing	-0.900937	0.0838338	Down	Up	DownUp
ENSMUSG00000026317	Cortex	0.133681	Liver	0.270281	Development	0.270281	0.0479051	Up	Up	UpUp
ENSMUSG00000026317	Cortex	0.133681	Liver	0.0479051	Ageing	0.270281	0.0479051	Up	Up	UpUp
ENSMUSG00000063362	Cortex	0.160444	Liver	0.360375	Development	0.360375	0.167668	Up	Up	UpUp
ENSMUSG00000063362	Cortex	0.160444	Liver	0.167668	Ageing	0.360375	0.167668	Up	Up	UpUp
ENSMUSG00000031482	Cortex	-1.22758	Liver	0.360375	Development	0.360375	-0.730552	Up	Down	UpDown
ENSMUSG00000031482	Cortex	-1.22758	Liver	-0.730552	Ageing	0.360375	-0.730552	Up	Down	UpDown
ENSMUSG00000031549	Cortex	-0.336682	Liver	-0.2883	Development	-0.2883	-0.0718576	Down	Down	DownDown
ENSMUSG00000031549	Cortex	-0.336682	Liver	-0.0718576	Ageing	-0.2883	-0.0718576	Down	Down	DownDown
ENSMUSG00000031583	Cortex	-1.09756	Liver	0.2	Development	0.2	-0.227549	Up	Down	UpDown
ENSMUSG00000031583	Cortex	-1.09756	Liver	-0.227549	Ageing	0.2	-0.227549	Up	Down	UpDown
ENSMUSG00000052906	Cortex	-1.0148	Liver	0.666694	Development	0.666694	0.311383	Up	Up	UpUp
ENSMUSG00000052906	Cortex	-1.0148	Liver	0.311383	Ageing	0.666694	0.311383	Up	Up	UpUp
ENSMUSG00000046794	Cortex	-1.53172	Liver	-0.828862	Development	-0.828862	0.215573	Down	Up	DownUp
ENSMUSG00000046794	Cortex	-1.53172	Liver	0.215573	Ageing	-0.828862	0.215573	Down	Up	DownUp
ENSMUSG00000025044	Cortex	-1.76407	Liver	-0.594619	Development	-0.594619	0.179644	Down	Up	DownUp
ENSMUSG00000025044	Cortex	-1.76407	Liver	0.179644	Ageing	-0.594619	0.179644	Down	Up	DownUp
ENSMUSG00000031594	Cortex	-0.880602	Liver	-0.414431	Development	-0.414431	0.299407	Down	Up	DownUp
ENSMUSG00000031594	Cortex	-0.880602	Liver	0.299407	Ageing	-0.414431	0.299407	Down	Up	DownUp
ENSMUSG00000031645	Cortex	-0.811771	Liver	0.14415	Development	0.14415	0.514979	Up	Up	UpUp
ENSMUSG00000031645	Cortex	-0.811771	Liver	0.514979	Ageing	0.14415	0.514979	Up	Up	UpUp
ENSMUSG00000109764	Cortex	-0.808602	Liver	-0.360375	Development	-0.360375	-0.0598813	Down	Down	DownDown
ENSMUSG00000109764	Cortex	-0.808602	Liver	-0.0598813	Ageing	-0.360375	-0.0598813	Down	Down	DownDown
ENSMUSG00000031640	Cortex	-0.787778	Liver	0.2883	Development	0.2883	-0.481928	Up	Down	UpDown
ENSMUSG00000031640	Cortex	-0.787778	Liver	-0.481928	Ageing	0.2883	-0.481928	Up	Down	UpDown
ENSMUSG00000079057	Cortex	-1.21708	Liver	0.792825	Development	0.792825	0.694623	Up	Up	UpUp
ENSMUSG00000079057	Cortex	-1.21708	Liver	0.694623	Ageing	0.792825	0.694623	Up	Up	UpUp
ENSMUSG00000018796	Cortex	-1.38001	Liver	0.612637	Development	0.612637	0.239525	Up	Up	UpUp
ENSMUSG00000018796	Cortex	-1.38001	Liver	0.239525	Ageing	0.612637	0.239525	Up	Up	UpUp
ENSMUSG00000038225	Cortex	-2.42569	Liver	-0.684712	Development	-0.684712	0.503003	Down	Up	DownUp
ENSMUSG00000038225	Cortex	-2.42569	Liver	0.503003	Ageing	-0.684712	0.503003	Down	Up	DownUp
ENSMUSG00000057228	Cortex	-0.6922	Liver	-0.828862	Development	-0.828862	0.395217	Down	Up	DownUp
ENSMUSG00000057228	Cortex	-0.6922	Liver	0.395217	Ageing	-0.828862	0.395217	Down	Up	DownUp
ENSMUSG00000037921	Cortex	-1.50773	Liver	-0.378394	Development	-0.378394	0.433735	Down	Up	DownUp
ENSMUSG00000037921	Cortex	-1.50773	Liver	0.433735	Ageing	-0.378394	0.433735	Down	Up	DownUp
ENSMUSG00000051147	Cortex	-2.01714	Liver	-0.594619	Development	-0.594619	-0.443122	Down	Down	DownDown
ENSMUSG00000051147	Cortex	-2.01714	Liver	-0.443122	Ageing	-0.594619	-0.443122	Down	Down	DownDown
ENSMUSG00000036330	Cortex	-1.90904	Liver	0.882919	Development	0.882919	-0.251502	Up	Down	UpDown
ENSMUSG00000036330	Cortex	-1.90904	Liver	-0.251502	Ageing	0.882919	-0.251502	Up	Down	UpDown
ENSMUSG00000036151	Cortex	-0.571448	Liver	0.810844	Development	0.810844	0	Up	Down	UpDown
ENSMUSG00000036151	Cortex	-0.571448	Liver	0	Ageing	0.810844	0	Up	Down	UpDown
ENSMUSG00000002346	Cortex	-0.502155	Liver	0.991031	Development	0.991031	0.0958101	Up	Up	UpUp
ENSMUSG00000002346	Cortex	-0.502155	Liver	0.0958101	Ageing	0.991031	0.0958101	Up	Up	UpUp
ENSMUSG00000058301	Cortex	-1.17368	Liver	0.234244	Development	0.234244	-0.114458	Up	Down	UpDown
ENSMUSG00000058301	Cortex	-1.17368	Liver	-0.114458	Ageing	0.234244	-0.114458	Up	Down	UpDown
ENSMUSG00000038508	Cortex	-1.19366	Liver	-0.252262	Development	-0.252262	0.562884	Down	Up	DownUp
ENSMUSG00000038508	Cortex	-1.19366	Liver	0.562884	Ageing	-0.252262	0.562884	Down	Up	DownUp
ENSMUSG00000056204	Cortex	-0.927041	Liver	-0.882919	Development	-0.882919	-0.19162	Down	Down	DownDown
ENSMUSG00000056204	Cortex	-0.927041	Liver	-0.19162	Ageing	-0.882919	-0.19162	Down	Down	DownDown
ENSMUSG00000031842	Cortex	-1.16307	Liver	0.900937	Development	0.900937	-0.331325	Up	Down	UpDown
ENSMUSG00000031842	Cortex	-1.16307	Liver	-0.331325	Ageing	0.900937	-0.331325	Up	Down	UpDown
ENSMUSG00000046408	Cortex	-0.731417	Liver	-0.14415	Development	-0.14415	-0.550908	Down	Down	DownDown
ENSMUSG00000046408	Cortex	-0.731417	Liver	-0.550908	Ageing	-0.14415	-0.550908	Down	Down	DownDown
ENSMUSG00000003809	Cortex	-0.836511	Liver	0.846881	Development	0.846881	0	Up	Down	UpDown
ENSMUSG00000003809	Cortex	-0.836511	Liver	0	Ageing	0.846881	0	Up	Down	UpDown
ENSMUSG00000047866	Cortex	-1.18772	Liver	-0.0360375	Development	-0.0360375	0.335335	Down	Up	DownUp
ENSMUSG00000047866	Cortex	-1.18772	Liver	0.335335	Ageing	-0.0360375	0.335335	Down	Up	DownUp
ENSMUSG00000078964	Cortex	-0.847809	Liver	0.486506	Development	0.486506	-0.347312	Up	Down	UpDown
ENSMUSG00000078964	Cortex	-0.847809	Liver	-0.347312	Ageing	0.486506	-0.347312	Up	Down	UpDown
ENSMUSG00000061959	Cortex	-1.2004	Liver	-0.126131	Development	-0.126131	-0.0359288	Down	Down	DownDown
ENSMUSG00000061959	Cortex	-1.2004	Liver	-0.0359288	Ageing	-0.126131	-0.0359288	Down	Down	DownDown
ENSMUSG00000057400	Cortex	-0.831834	Liver	-0.180187	Development	-0.180187	0.167668	Down	Up	DownUp
ENSMUSG00000057400	Cortex	-0.831834	Liver	0.167668	Ageing	-0.180187	0.167668	Down	Up	DownUp
ENSMUSG00000057074	Cortex	-0.87675	Liver	0	Development	0	0.251502	Down	Up	DownUp
ENSMUSG00000057074	Cortex	-0.87675	Liver	0.251502	Ageing	0	0.251502	Down	Up	DownUp
ENSMUSG00000031671	Cortex	-0.145161	Liver	-0.72075	Development	-0.72075	0.586837	Down	Up	DownUp
ENSMUSG00000031671	Cortex	-0.145161	Liver	0.586837	Ageing	-0.72075	0.586837	Down	Up	DownUp
ENSMUSG00000055730	Cortex	-0.832342	Liver	0.342356	Development	0.342356	0.275454	Up	Up	UpUp
ENSMUSG00000055730	Cortex	-0.832342	Liver	0.275454	Ageing	0.342356	0.275454	Up	Up	UpUp
ENSMUSG00000031886	Cortex	-0.962063	Liver	0.43245	Development	0.43245	0.143715	Up	Up	UpUp
ENSMUSG00000031886	Cortex	-0.962063	Liver	0.143715	Ageing	0.43245	0.143715	Up	Up	UpUp
ENSMUSG00000069922	Cortex	-0.852504	Liver	-0.126131	Development	-0.126131	-0.658694	Down	Down	DownDown
ENSMUSG00000069922	Cortex	-0.852504	Liver	-0.658694	Ageing	-0.126131	-0.658694	Down	Down	DownDown
ENSMUSG00000041679	Cortex	-1.63355	Liver	-0.198206	Development	-0.198206	-0.514979	Down	Down	DownDown
ENSMUSG00000041679	Cortex	-1.63355	Liver	-0.514979	Ageing	-0.198206	-0.514979	Down	Down	DownDown
ENSMUSG00000035237	Cortex	-0.274857	Liver	0.954994	Development	0.954994	-0.586837	Up	Down	UpDown
ENSMUSG00000035237	Cortex	-0.274857	Liver	-0.586837	Ageing	0.954994	-0.586837	Up	Down	UpDown
ENSMUSG00000001670	Cortex	-0.856334	Liver	-0.306319	Development	-0.306319	0.263478	Down	Up	DownUp
ENSMUSG00000001670	Cortex	-0.856334	Liver	0.263478	Ageing	-0.306319	0.263478	Down	Up	DownUp
ENSMUSG00000034424	Cortex	-0.866197	Liver	0.2883	Development	0.2883	0.754505	Up	Up	UpUp
ENSMUSG00000034424	Cortex	-0.866197	Liver	0.754505	Ageing	0.2883	0.754505	Up	Up	UpUp
ENSMUSG00000031845	Cortex	-0.822041	Liver	0.342356	Development	0.342356	-0.107786	Up	Down	UpDown
ENSMUSG00000031845	Cortex	-0.822041	Liver	-0.107786	Ageing	0.342356	-0.107786	Up	Down	UpDown
ENSMUSG00000034308	Cortex	-0.566583	Liver	0.954994	Development	0.954994	-0.658694	Up	Down	UpDown
ENSMUSG00000034308	Cortex	-0.566583	Liver	-0.658694	Ageing	0.954994	-0.658694	Up	Down	UpDown
ENSMUSG00000031844	Cortex	-0.981994	Liver	-0.252262	Development	-0.252262	0.538932	Down	Up	DownUp
ENSMUSG00000031844	Cortex	-0.981994	Liver	0.538932	Ageing	-0.252262	0.538932	Down	Up	DownUp
ENSMUSG00000074063	Cortex	-1.61871	Liver	0.540562	Development	0.540562	0.179644	Up	Up	UpUp
ENSMUSG00000074063	Cortex	-1.61871	Liver	0.179644	Ageing	0.540562	0.179644	Up	Up	UpUp
ENSMUSG00000031980	Cortex	-1.41039	Liver	0.828862	Development	0.828862	-0.28743	Up	Down	UpDown
ENSMUSG00000031980	Cortex	-1.41039	Liver	-0.28743	Ageing	0.828862	-0.28743	Up	Down	UpDown
ENSMUSG00000043068	Cortex	-1.63236	Liver	0.594619	Development	0.594619	0.694623	Up	Up	UpUp
ENSMUSG00000043068	Cortex	-1.63236	Liver	0.694623	Ageing	0.594619	0.694623	Up	Up	UpUp
ENSMUSG00000031853	Cortex	-0.113821	Liver	-0.666694	Development	-0.666694	0.0239525	Down	Up	DownUp
ENSMUSG00000031853	Cortex	-0.113821	Liver	0.0239525	Ageing	-0.666694	0.0239525	Down	Up	DownUp
ENSMUSG00000038742	Cortex	0.226791	Liver	-0.342356	Development	-0.342356	0.0119763	Down	Up	DownUp
ENSMUSG00000038742	Cortex	0.226791	Liver	0.0119763	Ageing	-0.342356	0.0119763	Down	Up	DownUp
ENSMUSG00000031938	Cortex	-0.808558	Liver	-0.936975	Development	-0.936975	0.203596	Down	Up	DownUp
ENSMUSG00000031938	Cortex	-0.808558	Liver	0.203596	Ageing	-0.936975	0.203596	Down	Up	DownUp
ENSMUSG00000047822	Cortex	-1.13512	Liver	-0.396412	Development	-0.396412	0.275454	Down	Up	DownUp
ENSMUSG00000047822	Cortex	-1.13512	Liver	0.275454	Ageing	-0.396412	0.275454	Down	Up	DownUp
ENSMUSG00000040883	Cortex	-1.77106	Liver	0.810844	Development	0.810844	0.778457	Up	Up	UpUp
ENSMUSG00000040883	Cortex	-1.77106	Liver	0.778457	Ageing	0.810844	0.778457	Up	Up	UpUp
ENSMUSG00000032018	Cortex	-0.0324095	Liver	-0.342356	Development	-0.342356	-0.538932	Down	Down	DownDown
ENSMUSG00000032018	Cortex	-0.0324095	Liver	-0.538932	Ageing	-0.342356	-0.538932	Down	Down	DownDown
ENSMUSG00000032014	Cortex	-1.44682	Liver	0.774806	Development	0.774806	0.275454	Up	Up	UpUp
ENSMUSG00000032014	Cortex	-1.44682	Liver	0.275454	Ageing	0.774806	0.275454	Up	Up	UpUp
ENSMUSG00000039438	Cortex	-1.15264	Liver	0.108112	Development	0.108112	-0.0598813	Up	Down	UpDown
ENSMUSG00000039438	Cortex	-1.15264	Liver	-0.0598813	Ageing	0.108112	-0.0598813	Up	Down	UpDown
ENSMUSG00000032092	Cortex	-1.23302	Liver	-0.216225	Development	-0.216225	-0.0598813	Down	Down	DownDown
ENSMUSG00000032092	Cortex	-1.23302	Liver	-0.0598813	Ageing	-0.216225	-0.0598813	Down	Down	DownDown
ENSMUSG00000032083	Cortex	-0.859169	Liver	-0.234244	Development	-0.234244	0.479051	Down	Up	DownUp
ENSMUSG00000032083	Cortex	-0.859169	Liver	0.479051	Ageing	-0.234244	0.479051	Down	Up	DownUp
ENSMUSG00000032081	Cortex	-0.936245	Liver	-0.198206	Development	-0.198206	0.538932	Down	Up	DownUp
ENSMUSG00000032081	Cortex	-0.936245	Liver	0.538932	Ageing	-0.198206	0.538932	Down	Up	DownUp
ENSMUSG00000032080	Cortex	-0.875576	Liver	-0.666694	Development	-0.666694	0.215573	Down	Up	DownUp
ENSMUSG00000032080	Cortex	-0.875576	Liver	0.215573	Ageing	-0.666694	0.215573	Down	Up	DownUp
ENSMUSG00000032079	Cortex	-0.852477	Liver	0.738769	Development	0.738769	0.0479051	Up	Up	UpUp
ENSMUSG00000032079	Cortex	-0.852477	Liver	0.0479051	Ageing	0.738769	0.0479051	Up	Up	UpUp
ENSMUSG00000032028	Cortex	-1.30184	Liver	-0.486506	Development	-0.486506	0.371264	Down	Up	DownUp
ENSMUSG00000032028	Cortex	-1.30184	Liver	0.371264	Ageing	-0.486506	0.371264	Down	Up	DownUp
ENSMUSG00000032066	Cortex	-0.342631	Liver	0.936975	Development	0.936975	-0.275454	Up	Down	UpDown
ENSMUSG00000032066	Cortex	-0.342631	Liver	-0.275454	Ageing	0.936975	-0.275454	Up	Down	UpDown
ENSMUSG00000032047	Cortex	-0.801552	Liver	-0.792825	Development	-0.792825	0.550908	Down	Up	DownUp
ENSMUSG00000032047	Cortex	-0.801552	Liver	0.550908	Ageing	-0.792825	0.550908	Down	Up	DownUp
ENSMUSG00000035878	Cortex	-0.993668	Liver	-0.126131	Development	-0.126131	-0.263478	Down	Down	DownDown
ENSMUSG00000035878	Cortex	-0.993668	Liver	-0.263478	Ageing	-0.126131	-0.263478	Down	Down	DownDown
ENSMUSG00000032309	Cortex	-0.685888	Liver	-0.954994	Development	-0.954994	0.514979	Down	Up	DownUp
ENSMUSG00000032309	Cortex	-0.685888	Liver	0.514979	Ageing	-0.954994	0.514979	Down	Up	DownUp
ENSMUSG00000032310	Cortex	-0.82627	Liver	-0.252262	Development	-0.252262	0.38324	Down	Up	DownUp
ENSMUSG00000032310	Cortex	-0.82627	Liver	0.38324	Ageing	-0.252262	0.38324	Down	Up	DownUp
ENSMUSG00000032392	Cortex	-1.26659	Liver	-0.882919	Development	-0.882919	-0.38324	Down	Down	DownDown
ENSMUSG00000032392	Cortex	-1.26659	Liver	-0.38324	Ageing	-0.882919	-0.38324	Down	Down	DownDown
ENSMUSG00000032387	Cortex	-1.52522	Liver	-0.2883	Development	-0.2883	-0.311383	Down	Down	DownDown
ENSMUSG00000032387	Cortex	-1.52522	Liver	-0.311383	Ageing	-0.2883	-0.311383	Down	Down	DownDown
ENSMUSG00000032370	Cortex	-0.878282	Liver	0.810844	Development	0.810844	-0.0119763	Up	Down	UpDown
ENSMUSG00000032370	Cortex	-0.878282	Liver	-0.0119763	Ageing	0.810844	-0.0119763	Up	Down	UpDown
ENSMUSG00000032207	Cortex	-1.02908	Liver	0.486506	Development	0.486506	-0.179644	Up	Down	UpDown
ENSMUSG00000032207	Cortex	-1.02908	Liver	-0.179644	Ageing	0.486506	-0.179644	Up	Down	UpDown
ENSMUSG00000032204	Cortex	-0.906488	Liver	0.14415	Development	0.14415	-0.886243	Up	Down	UpDown
ENSMUSG00000032204	Cortex	-0.906488	Liver	-0.886243	Ageing	0.14415	-0.886243	Up	Down	UpDown
ENSMUSG00000032350	Cortex	-0.755906	Liver	0.882919	Development	0.882919	0.131739	Up	Up	UpUp
ENSMUSG00000032350	Cortex	-0.755906	Liver	0.131739	Ageing	0.882919	0.131739	Up	Up	UpUp
ENSMUSG00000032261	Cortex	-0.301097	Liver	0.8649	Development	0.8649	-0.311383	Up	Down	UpDown
ENSMUSG00000032261	Cortex	-0.301097	Liver	-0.311383	Ageing	0.8649	-0.311383	Up	Down	UpDown
ENSMUSG00000032263	Cortex	-0.721742	Liver	0.954994	Development	0.954994	0.251502	Up	Up	UpUp
ENSMUSG00000032263	Cortex	-0.721742	Liver	0.251502	Ageing	0.954994	0.251502	Up	Up	UpUp
ENSMUSG00000056131	Cortex	-0.507714	Liver	-0.882919	Development	-0.882919	-0.263478	Down	Down	DownDown
ENSMUSG00000056131	Cortex	-0.507714	Liver	-0.263478	Ageing	-0.882919	-0.263478	Down	Down	DownDown
ENSMUSG00000066442	Cortex	-2.23785	Liver	0.828862	Development	0.828862	0.514979	Up	Up	UpUp
ENSMUSG00000066442	Cortex	-2.23785	Liver	0.514979	Ageing	0.828862	0.514979	Up	Up	UpUp
ENSMUSG00000079427	Cortex	-1.78112	Liver	0.846881	Development	0.846881	0	Up	Down	UpDown
ENSMUSG00000079427	Cortex	-1.78112	Liver	0	Ageing	0.846881	0	Up	Down	UpDown
ENSMUSG00000064225	Cortex	0.235555	Liver	0.180187	Development	0.180187	-0.143715	Up	Down	UpDown
ENSMUSG00000064225	Cortex	0.235555	Liver	-0.143715	Ageing	0.180187	-0.143715	Up	Down	UpDown
ENSMUSG00000032469	Cortex	-0.891227	Liver	-0.5766	Development	-0.5766	0.19162	Down	Up	DownUp
ENSMUSG00000032469	Cortex	-0.891227	Liver	0.19162	Ageing	-0.5766	0.19162	Down	Up	DownUp
ENSMUSG00000032527	Cortex	-0.79566	Liver	-0.0180187	Development	-0.0180187	0.131739	Down	Up	DownUp
ENSMUSG00000032527	Cortex	-0.79566	Liver	0.131739	Ageing	-0.0180187	0.131739	Down	Up	DownUp
ENSMUSG00000033688	Cortex	-0.929161	Liver	0.828862	Development	0.828862	0.203596	Up	Up	UpUp
ENSMUSG00000033688	Cortex	-0.929161	Liver	0.203596	Ageing	0.828862	0.203596	Up	Up	UpUp
ENSMUSG00000032554	Cortex	-1.5471	Liver	0.836364	Development	0.836364	0.970077	Up	Up	UpUp
ENSMUSG00000032554	Cortex	-1.5471	Liver	0.970077	Ageing	0.836364	0.970077	Up	Up	UpUp
ENSMUSG00000090150	Cortex	-0.933104	Liver	0.991031	Development	0.991031	0.0958101	Up	Up	UpUp
ENSMUSG00000090150	Cortex	-0.933104	Liver	0.0958101	Ageing	0.991031	0.0958101	Up	Up	UpUp
ENSMUSG00000020258	Cortex	-0.539443	Liver	0.810844	Development	0.810844	0.119763	Up	Up	UpUp
ENSMUSG00000020258	Cortex	-0.539443	Liver	0.119763	Ageing	0.810844	0.119763	Up	Up	UpUp
ENSMUSG00000023262	Cortex	-1.1014	Liver	-0.0180187	Development	-0.0180187	0.622766	Down	Up	DownUp
ENSMUSG00000023262	Cortex	-1.1014	Liver	0.622766	Ageing	-0.0180187	0.622766	Down	Up	DownUp
ENSMUSG00000042073	Cortex	-2.04532	Liver	0.594619	Development	0.594619	0.730552	Up	Up	UpUp
ENSMUSG00000042073	Cortex	-2.04532	Liver	0.730552	Ageing	0.594619	0.730552	Up	Up	UpUp
ENSMUSG00000034837	Cortex	-0.809803	Liver	-0.126131	Development	-0.126131	0.227549	Down	Up	DownUp
ENSMUSG00000034837	Cortex	-0.809803	Liver	0.227549	Ageing	-0.126131	0.227549	Down	Up	DownUp
ENSMUSG00000032591	Cortex	-0.972151	Liver	-0.14415	Development	-0.14415	0.203596	Down	Up	DownUp
ENSMUSG00000032591	Cortex	-0.972151	Liver	0.203596	Ageing	-0.14415	0.203596	Down	Up	DownUp
ENSMUSG00000063856	Cortex	-2.1722	Liver	-0.738769	Development	-0.738769	0.19162	Down	Up	DownUp
ENSMUSG00000063856	Cortex	-2.1722	Liver	0.19162	Ageing	-0.738769	0.19162	Down	Up	DownUp
ENSMUSG00000066319	Cortex	-1.28803	Liver	-0.378394	Development	-0.378394	-0.311383	Down	Down	DownDown
ENSMUSG00000066319	Cortex	-1.28803	Liver	-0.311383	Ageing	-0.378394	-0.311383	Down	Down	DownDown
ENSMUSG00000049555	Cortex	-0.46681	Liver	0.468487	Development	0.468487	0.275454	Up	Up	UpUp
ENSMUSG00000049555	Cortex	-0.46681	Liver	0.275454	Ageing	0.468487	0.275454	Up	Up	UpUp
ENSMUSG00000032498	Cortex	-0.501405	Liver	-0.738769	Development	-0.738769	-0.167668	Down	Down	DownDown
ENSMUSG00000032498	Cortex	-0.501405	Liver	-0.167668	Ageing	-0.738769	-0.167668	Down	Down	DownDown
ENSMUSG00000010651	Cortex	-1.17319	Liver	0.0360375	Development	0.0360375	-0.131739	Up	Down	UpDown
ENSMUSG00000010651	Cortex	-1.17319	Liver	-0.131739	Ageing	0.0360375	-0.131739	Up	Down	UpDown
ENSMUSG00000035769	Cortex	-0.434294	Liver	0.738769	Development	0.738769	0.718576	Up	Up	UpUp
ENSMUSG00000035769	Cortex	-0.434294	Liver	0.718576	Ageing	0.738769	0.718576	Up	Up	UpUp
ENSMUSG00000050445	Cortex	-0.898754	Liver	0.234244	Development	0.234244	-0.0479051	Up	Down	UpDown
ENSMUSG00000050445	Cortex	-0.898754	Liver	-0.0479051	Ageing	0.234244	-0.0479051	Up	Down	UpDown
ENSMUSG00000107504	Cortex	-0.542849	Liver	0.954994	Development	0.954994	0.0479051	Up	Up	UpUp
ENSMUSG00000107504	Cortex	-0.542849	Liver	0.0479051	Ageing	0.954994	0.0479051	Up	Up	UpUp
ENSMUSG00000031168	Cortex	-2.24755	Liver	0.43245	Development	0.43245	0.0838338	Up	Up	UpUp
ENSMUSG00000031168	Cortex	-2.24755	Liver	0.0838338	Ageing	0.43245	0.0838338	Up	Up	UpUp
ENSMUSG00000031173	Cortex	-0.829326	Liver	-0.378394	Development	-0.378394	0.730552	Down	Up	DownUp
ENSMUSG00000031173	Cortex	-0.829326	Liver	0.730552	Ageing	-0.378394	0.730552	Down	Up	DownUp
ENSMUSG00000040147	Cortex	-1.07737	Liver	0.954994	Development	0.954994	0.89822	Up	Up	UpUp
ENSMUSG00000040147	Cortex	-1.07737	Liver	0.89822	Ageing	0.954994	0.89822	Up	Up	UpUp
ENSMUSG00000023070	Cortex	-0.888405	Liver	0.324337	Development	0.324337	-0.131739	Up	Down	UpDown
ENSMUSG00000023070	Cortex	-0.888405	Liver	-0.131739	Ageing	0.324337	-0.131739	Up	Down	UpDown
ENSMUSG00000031138	Cortex	-0.802364	Liver	0.666694	Development	0.666694	0.347312	Up	Up	UpUp
ENSMUSG00000031138	Cortex	-0.802364	Liver	0.347312	Ageing	0.666694	0.347312	Up	Up	UpUp
ENSMUSG00000062949	Cortex	-0.687004	Liver	-0.846881	Development	-0.846881	-0.538932	Down	Down	DownDown
ENSMUSG00000062949	Cortex	-0.687004	Liver	-0.538932	Ageing	-0.846881	-0.538932	Down	Down	DownDown
ENSMUSG00000057836	Cortex	-0.126573	Liver	0.378394	Development	0.378394	-0.646718	Up	Down	UpDown
ENSMUSG00000057836	Cortex	-0.126573	Liver	-0.646718	Ageing	0.378394	-0.646718	Up	Down	UpDown
ENSMUSG00000031196	Cortex	-0.784798	Liver	0.216225	Development	0.216225	0.407193	Up	Up	UpUp
ENSMUSG00000031196	Cortex	-0.784798	Liver	0.407193	Ageing	0.216225	0.407193	Up	Up	UpUp
ENSMUSG00000004221	Cortex	-0.339326	Liver	0.378394	Development	0.378394	-0.646718	Up	Down	UpDown
ENSMUSG00000004221	Cortex	-0.339326	Liver	-0.646718	Ageing	0.378394	-0.646718	Up	Down	UpDown
ENSMUSG00000025059	Cortex	-0.374859	Liver	0.558581	Development	0.558581	-0.479051	Up	Down	UpDown
ENSMUSG00000025059	Cortex	-0.374859	Liver	-0.479051	Ageing	0.558581	-0.479051	Up	Down	UpDown
ENSMUSG00000047797	Cortex	-0.542767	Liver	0.792825	Development	0.792825	0.99403	Up	Up	UpUp
ENSMUSG00000047797	Cortex	-0.542767	Liver	0.99403	Ageing	0.792825	0.99403	Up	Up	UpUp
ENSMUSG00000079480	Cortex	-0.872972	Liver	-0.252262	Development	-0.252262	0	Down	Down	DownDown
ENSMUSG00000079480	Cortex	-0.872972	Liver	0	Ageing	-0.252262	0	Down	Down	DownDown
ENSMUSG00000048621	Cortex	-1.00552	Liver	-0.558581	Development	-0.558581	-0.227549	Down	Down	DownDown
ENSMUSG00000048621	Cortex	-1.00552	Liver	-0.227549	Ageing	-0.558581	-0.227549	Down	Down	DownDown
ENSMUSG00000031271	Cortex	-0.858268	Liver	0.486506	Development	0.486506	0.347312	Up	Up	UpUp
ENSMUSG00000031271	Cortex	-0.858268	Liver	0.347312	Ageing	0.486506	0.347312	Up	Up	UpUp
ENSMUSG00000031438	Cortex	-0.714504	Liver	0.954994	Development	0.954994	-0.706599	Up	Down	UpDown
ENSMUSG00000031438	Cortex	-0.714504	Liver	-0.706599	Ageing	0.954994	-0.706599	Up	Down	UpDown
ENSMUSG00000047230	Cortex	-0.957337	Liver	-0.666694	Development	-0.666694	-0.718576	Down	Down	DownDown
ENSMUSG00000047230	Cortex	-0.957337	Liver	-0.718576	Ageing	-0.666694	-0.718576	Down	Down	DownDown
ENSMUSG00000025271	Cortex	-1.20972	Liver	-0.936975	Development	-0.936975	-0.179644	Down	Down	DownDown
ENSMUSG00000025271	Cortex	-1.20972	Liver	-0.179644	Ageing	-0.936975	-0.179644	Down	Down	DownDown
ENSMUSG00000031381	Cortex	-0.953642	Liver	-0.0180187	Development	-0.0180187	0.215573	Down	Up	DownUp
ENSMUSG00000031381	Cortex	-0.953642	Liver	0.215573	Ageing	-0.0180187	0.215573	Down	Up	DownUp
ENSMUSG00000030228	Cortex	-0.984177	Liver	-0.810844	Development	-0.810844	-0.503003	Down	Down	DownDown
ENSMUSG00000030228	Cortex	-0.984177	Liver	-0.503003	Ageing	-0.810844	-0.503003	Down	Down	DownDown
ENSMUSG00000025911	Lung	-1.16432	Liver	0.738769	Development	0.738769	0.537834	Up	Up	UpUp
ENSMUSG00000025911	Lung	-1.16432	Liver	0.537834	Ageing	0.738769	0.537834	Up	Up	UpUp
ENSMUSG00000099032	Lung	-0.584734	Liver	0.252262	Development	0.252262	0.100844	Up	Up	UpUp
ENSMUSG00000099032	Lung	-0.584734	Liver	0.100844	Ageing	0.252262	0.100844	Up	Up	UpUp
ENSMUSG00000025937	Lung	-0.381729	Liver	-0.198206	Development	-0.198206	-0.537834	Down	Down	DownDown
ENSMUSG00000025937	Lung	-0.381729	Liver	-0.537834	Ageing	-0.198206	-0.537834	Down	Down	DownDown
ENSMUSG00000043760	Lung	-0.650519	Liver	-0.774806	Development	-0.774806	-0.638678	Down	Down	DownDown
ENSMUSG00000043760	Lung	-0.650519	Liver	-0.638678	Ageing	-0.774806	-0.638678	Down	Down	DownDown
ENSMUSG00000025934	Lung	0.377986	Liver	0.702731	Development	0.702731	-0.434603	Up	Down	UpDown
ENSMUSG00000025934	Lung	0.377986	Liver	-0.434603	Ageing	0.702731	-0.434603	Up	Down	UpDown
ENSMUSG00000026127	Lung	-0.574212	Liver	0.450469	Development	0.450469	0.764733	Up	Up	UpUp
ENSMUSG00000026127	Lung	-0.574212	Liver	0.764733	Ageing	0.450469	0.764733	Up	Up	UpUp
ENSMUSG00000048234	Lung	-0.102631	Liver	-0.558581	Development	-0.558581	0.453798	Down	Up	DownUp
ENSMUSG00000048234	Lung	-0.102631	Liver	0.453798	Ageing	-0.558581	0.453798	Down	Up	DownUp
ENSMUSG00000025993	Lung	-0.914965	Liver	-0.558581	Development	-0.558581	0.0924402	Down	Up	DownUp
ENSMUSG00000025993	Lung	-0.914965	Liver	0.0924402	Ageing	-0.558581	0.0924402	Down	Up	DownUp
ENSMUSG00000041426	Lung	-1.07076	Liver	0.0360375	Development	0.0360375	0.739522	Up	Up	UpUp
ENSMUSG00000041426	Lung	-1.07076	Liver	0.739522	Ageing	0.0360375	0.739522	Up	Up	UpUp
ENSMUSG00000025980	Lung	-1.64184	Liver	-0.180187	Development	-0.180187	0.504219	Down	Up	DownUp
ENSMUSG00000025980	Lung	-1.64184	Liver	0.504219	Ageing	-0.180187	0.504219	Down	Up	DownUp
ENSMUSG00000026014	Lung	-0.619183	Liver	-0.594619	Development	-0.594619	-0.563045	Down	Down	DownDown
ENSMUSG00000026014	Lung	-0.619183	Liver	-0.563045	Ageing	-0.594619	-0.563045	Down	Down	DownDown
ENSMUSG00000025991	Lung	-0.907514	Liver	0.540562	Development	0.540562	0.411779	Up	Up	UpUp
ENSMUSG00000025991	Lung	-0.907514	Liver	0.411779	Ageing	0.540562	0.411779	Up	Up	UpUp
ENSMUSG00000026189	Lung	-1.13405	Liver	-0.594619	Development	-0.594619	0.798348	Down	Up	DownUp
ENSMUSG00000026189	Lung	-1.13405	Liver	0.798348	Ageing	-0.594619	0.798348	Down	Up	DownUp
ENSMUSG00000026177	Lung	0.0457411	Liver	0.14415	Development	0.14415	0.949613	Up	Up	UpUp
[truncated: 5,889 more rows]

## Sheet: sdata3
geneid	tissue	ES	spec	rho	period	Development	Ageing	dev	age	rev
ENSMUSG00000025902	Cortex	-1.32586	Lung	-0.774806	Development	-0.774806	0.371264	Down	Up	DownUp
ENSMUSG00000025902	Cortex	-1.32586	Lung	0.371264	Ageing	-0.774806	0.371264	Down	Up	DownUp
ENSMUSG00000048960	Cortex	-0.270364	Lung	0.828862	Development	0.828862	-0.311383	Up	Down	UpDown
ENSMUSG00000048960	Cortex	-0.270364	Lung	-0.311383	Ageing	0.828862	-0.311383	Up	Down	UpDown
ENSMUSG00000041809	Cortex	-1.0846	Lung	-0.0360375	Development	-0.0360375	0	Down	Down	DownDown
ENSMUSG00000041809	Cortex	-1.0846	Lung	0	Ageing	-0.0360375	0	Down	Down	DownDown
ENSMUSG00000026070	Cortex	-0.98012	Lung	-0.738769	Development	-0.738769	-0.0598813	Down	Down	DownDown
ENSMUSG00000026070	Cortex	-0.98012	Lung	-0.0598813	Ageing	-0.738769	-0.0598813	Down	Down	DownDown
ENSMUSG00000045954	Cortex	-2.38275	Lung	0.684712	Development	0.684712	-0.371264	Up	Down	UpDown
ENSMUSG00000045954	Cortex	-2.38275	Lung	-0.371264	Ageing	0.684712	-0.371264	Up	Down	UpDown
ENSMUSG00000018417	Cortex	-1.13845	Lung	-0.918956	Development	-0.918956	0.455098	Down	Up	DownUp
ENSMUSG00000018417	Cortex	-1.13845	Lung	0.455098	Ageing	-0.918956	0.455098	Down	Up	DownUp
ENSMUSG00000052331	Cortex	-0.256467	Lung	-0.954994	Development	-0.954994	-0.622766	Down	Down	DownDown
ENSMUSG00000052331	Cortex	-0.256467	Lung	-0.622766	Ageing	-0.954994	-0.622766	Down	Down	DownDown
ENSMUSG00000025982	Cortex	0.184933	Lung	-0.558581	Development	-0.558581	-0.335335	Down	Down	DownDown
ENSMUSG00000025982	Cortex	0.184933	Lung	-0.335335	Ageing	-0.558581	-0.335335	Down	Down	DownDown
ENSMUSG00000026034	Cortex	-0.505832	Lung	0.540562	Development	0.540562	-0.299407	Up	Down	UpDown
ENSMUSG00000026034	Cortex	-0.505832	Lung	-0.299407	Ageing	0.540562	-0.299407	Up	Down	UpDown
ENSMUSG00000067336	Cortex	0.367998	Lung	-0.504525	Development	-0.504525	-0.514979	Down	Down	DownDown
ENSMUSG00000067336	Cortex	0.367998	Lung	-0.514979	Ageing	-0.504525	-0.514979	Down	Down	DownDown
ENSMUSG00000055322	Cortex	-1.90233	Lung	0.756787	Development	0.756787	-0.562884	Up	Down	UpDown
ENSMUSG00000055322	Cortex	-1.90233	Lung	-0.562884	Ageing	0.756787	-0.562884	Up	Down	UpDown
ENSMUSG00000073650	Cortex	-0.37104	Lung	0.991031	Development	0.991031	0.0598813	Up	Up	UpUp
ENSMUSG00000073650	Cortex	-0.37104	Lung	0.0598813	Ageing	0.991031	0.0598813	Up	Up	UpUp
ENSMUSG00000006299	Cortex	-1.75263	Lung	0.342356	Development	0.342356	0.227549	Up	Up	UpUp
ENSMUSG00000006299	Cortex	-1.75263	Lung	0.227549	Ageing	0.342356	0.227549	Up	Up	UpUp
ENSMUSG00000047021	Cortex	-0.194924	Lung	0.900937	Development	0.900937	0.491027	Up	Up	UpUp
ENSMUSG00000047021	Cortex	-0.194924	Lung	0.491027	Ageing	0.900937	0.491027	Up	Up	UpUp
ENSMUSG00000032908	Cortex	-0.00619019	Lung	0.936975	Development	0.936975	0.658694	Up	Up	UpUp
ENSMUSG00000032908	Cortex	-0.00619019	Lung	0.658694	Ageing	0.936975	0.658694	Up	Up	UpUp
ENSMUSG00000067158	Cortex	-0.914293	Lung	-0.738769	Development	-0.738769	-0.538932	Down	Down	DownDown
ENSMUSG00000067158	Cortex	-0.914293	Lung	-0.538932	Ageing	-0.738769	-0.538932	Down	Down	DownDown
ENSMUSG00000079465	Cortex	-0.92355	Lung	-0.234244	Development	-0.234244	-0.479051	Down	Down	DownDown
ENSMUSG00000079465	Cortex	-0.92355	Lung	-0.479051	Ageing	-0.234244	-0.479051	Down	Down	DownDown
ENSMUSG00000026303	Cortex	-1.0981	Lung	0.612637	Development	0.612637	0.371264	Up	Up	UpUp
ENSMUSG00000026303	Cortex	-1.0981	Lung	0.371264	Ageing	0.612637	0.371264	Up	Up	UpUp
ENSMUSG00000034292	Cortex	-0.104176	Lung	0.630656	Development	0.630656	-0.718576	Up	Down	UpDown
ENSMUSG00000034292	Cortex	-0.104176	Lung	-0.718576	Ageing	0.630656	-0.718576	Up	Down	UpDown
ENSMUSG00000047793	Cortex	-1.20581	Lung	-0.234244	Development	-0.234244	0.526956	Down	Up	DownUp
ENSMUSG00000047793	Cortex	-1.20581	Lung	0.526956	Ageing	-0.234244	0.526956	Down	Up	DownUp
ENSMUSG00000040693	Cortex	-0.22338	Lung	-0.072075	Development	-0.072075	-0.550908	Down	Down	DownDown
ENSMUSG00000040693	Cortex	-0.22338	Lung	-0.550908	Ageing	-0.072075	-0.550908	Down	Down	DownDown
ENSMUSG00000009907	Cortex	-1.7909	Lung	0.109091	Development	0.109091	-0.550908	Up	Down	UpDown
ENSMUSG00000009907	Cortex	-1.7909	Lung	-0.550908	Ageing	0.109091	-0.550908	Up	Down	UpDown
ENSMUSG00000004451	Cortex	-1.70874	Lung	-0.846881	Development	-0.846881	0.299407	Down	Up	DownUp
ENSMUSG00000004451	Cortex	-1.70874	Lung	0.299407	Ageing	-0.846881	0.299407	Down	Up	DownUp
ENSMUSG00000049690	Cortex	-0.0609483	Lung	-0.954994	Development	-0.954994	0.359288	Down	Up	DownUp
ENSMUSG00000049690	Cortex	-0.0609483	Lung	0.359288	Ageing	-0.954994	0.359288	Down	Up	DownUp
ENSMUSG00000042510	Cortex	-1.19692	Lung	0.882919	Development	0.882919	0.0718576	Up	Up	UpUp
ENSMUSG00000042510	Cortex	-1.19692	Lung	0.0718576	Ageing	0.882919	0.0718576	Up	Up	UpUp
ENSMUSG00000042268	Cortex	-0.842594	Lung	-0.684712	Development	-0.684712	-0.19162	Down	Down	DownDown
ENSMUSG00000042268	Cortex	-0.842594	Lung	-0.19162	Ageing	-0.684712	-0.19162	Down	Down	DownDown
ENSMUSG00000054387	Cortex	-0.505557	Lung	-0.738769	Development	-0.738769	-0.359288	Down	Down	DownDown
ENSMUSG00000054387	Cortex	-0.505557	Lung	-0.359288	Ageing	-0.738769	-0.359288	Down	Down	DownDown
ENSMUSG00000070643	Cortex	-1.71934	Lung	-0.2883	Development	-0.2883	0.299407	Down	Up	DownUp
ENSMUSG00000070643	Cortex	-1.71934	Lung	0.299407	Ageing	-0.2883	0.299407	Down	Up	DownUp
ENSMUSG00000064246	Cortex	-1.02716	Lung	0.828862	Development	0.828862	0.550908	Up	Up	UpUp
ENSMUSG00000064246	Cortex	-1.02716	Lung	0.550908	Ageing	0.828862	0.550908	Up	Up	UpUp
ENSMUSG00000102976	Cortex	-1.03084	Lung	-0.180187	Development	-0.180187	-0.0598813	Down	Down	DownDown
ENSMUSG00000102976	Cortex	-1.03084	Lung	-0.0598813	Ageing	-0.180187	-0.0598813	Down	Down	DownDown
ENSMUSG00000003051	Cortex	-1.47357	Lung	0.306319	Development	0.306319	0.299407	Up	Up	UpUp
ENSMUSG00000003051	Cortex	-1.47357	Lung	0.299407	Ageing	0.306319	0.299407	Up	Up	UpUp
ENSMUSG00000026421	Cortex	-0.692721	Lung	0.936975	Development	0.936975	0.886243	Up	Up	UpUp
ENSMUSG00000026421	Cortex	-0.692721	Lung	0.886243	Ageing	0.936975	0.886243	Up	Up	UpUp
ENSMUSG00000066842	Cortex	-1.02924	Lung	-0.594619	Development	-0.594619	-0.28743	Down	Down	DownDown
ENSMUSG00000066842	Cortex	-1.02924	Lung	-0.28743	Ageing	-0.594619	-0.28743	Down	Down	DownDown
ENSMUSG00000026479	Cortex	-0.87009	Lung	0.828862	Development	0.828862	-0.263478	Up	Down	UpDown
ENSMUSG00000026479	Cortex	-0.87009	Lung	-0.263478	Ageing	0.828862	-0.263478	Up	Down	UpDown
ENSMUSG00000026600	Cortex	-1.10111	Lung	0.828862	Development	0.828862	-0.467074	Up	Down	UpDown
ENSMUSG00000026600	Cortex	-1.10111	Lung	-0.467074	Ageing	0.828862	-0.467074	Up	Down	UpDown
ENSMUSG00000090394	Cortex	-2.62169	Lung	0.414431	Development	0.414431	-0.0598813	Up	Down	UpDown
ENSMUSG00000090394	Cortex	-2.62169	Lung	-0.0598813	Ageing	0.414431	-0.0598813	Up	Down	UpDown
ENSMUSG00000040170	Cortex	-1.36407	Lung	0.0540562	Development	0.0540562	0.419169	Up	Up	UpUp
ENSMUSG00000040170	Cortex	-1.36407	Lung	0.419169	Ageing	0.0540562	0.419169	Up	Up	UpUp
ENSMUSG00000026649	Cortex	-1.76687	Lung	-0.162169	Development	-0.162169	0.395217	Down	Up	DownUp
ENSMUSG00000026649	Cortex	-1.76687	Lung	0.395217	Ageing	-0.162169	0.395217	Down	Up	DownUp
ENSMUSG00000003458	Cortex	-0.748345	Lung	-0.72075	Development	-0.72075	-0.179644	Down	Down	DownDown
ENSMUSG00000003458	Cortex	-0.748345	Lung	-0.179644	Ageing	-0.72075	-0.179644	Down	Down	DownDown
ENSMUSG00000038855	Cortex	-1.26498	Lung	0.918956	Development	0.918956	-0.0718576	Up	Down	UpDown
ENSMUSG00000038855	Cortex	-1.26498	Lung	-0.0718576	Ageing	0.918956	-0.0718576	Up	Down	UpDown
ENSMUSG00000026509	Cortex	-1.26747	Lung	-0.612637	Development	-0.612637	-0.0119763	Down	Down	DownDown
ENSMUSG00000026509	Cortex	-1.26747	Lung	-0.0119763	Ageing	-0.612637	-0.0119763	Down	Down	DownDown
ENSMUSG00000026604	Cortex	-1.38058	Lung	0.252262	Development	0.252262	-0.407193	Up	Down	UpDown
ENSMUSG00000026604	Cortex	-1.38058	Lung	-0.407193	Ageing	0.252262	-0.407193	Up	Down	UpDown
ENSMUSG00000026639	Cortex	-1.42117	Lung	0.738769	Development	0.738769	0.0838338	Up	Up	UpUp
ENSMUSG00000026639	Cortex	-1.42117	Lung	0.0838338	Ageing	0.738769	0.0838338	Up	Up	UpUp
ENSMUSG00000019767	Cortex	-0.640426	Lung	-0.198206	Development	-0.198206	-0.131739	Down	Down	DownDown
ENSMUSG00000019767	Cortex	-0.640426	Lung	-0.131739	Ageing	-0.198206	-0.131739	Down	Down	DownDown
ENSMUSG00000046916	Cortex	-2.69338	Lung	-0.774806	Development	-0.774806	0.299407	Down	Up	DownUp
ENSMUSG00000046916	Cortex	-2.69338	Lung	0.299407	Ageing	-0.774806	0.299407	Down	Up	DownUp
ENSMUSG00000015305	Cortex	-0.348871	Lung	0.666694	Development	0.666694	-0.107786	Up	Down	UpDown
ENSMUSG00000015305	Cortex	-0.348871	Lung	-0.107786	Ageing	0.666694	-0.107786	Up	Down	UpDown
ENSMUSG00000019820	Cortex	-0.520614	Lung	0.900937	Development	0.900937	0.0838338	Up	Up	UpUp
ENSMUSG00000019820	Cortex	-0.520614	Lung	0.0838338	Ageing	0.900937	0.0838338	Up	Up	UpUp
ENSMUSG00000062866	Cortex	-1.06138	Lung	0.684712	Development	0.684712	-0.538932	Up	Down	UpDown
ENSMUSG00000062866	Cortex	-1.06138	Lung	-0.538932	Ageing	0.684712	-0.538932	Up	Down	UpDown
ENSMUSG00000039116	Cortex	-0.856401	Lung	0.0180187	Development	0.0180187	0.467074	Up	Up	UpUp
ENSMUSG00000039116	Cortex	-0.856401	Lung	0.467074	Ageing	0.0180187	0.467074	Up	Up	UpUp
ENSMUSG00000019850	Cortex	-1.72372	Lung	0.324337	Development	0.324337	0.467074	Up	Up	UpUp
ENSMUSG00000019850	Cortex	-1.72372	Lung	0.467074	Ageing	0.324337	0.467074	Up	Up	UpUp
ENSMUSG00000045680	Cortex	-1.3182	Lung	0.234244	Development	0.234244	-0.407193	Up	Down	UpDown
ENSMUSG00000045680	Cortex	-1.3182	Lung	-0.407193	Ageing	0.234244	-0.407193	Up	Down	UpDown
ENSMUSG00000019997	Cortex	-0.666998	Lung	0.684712	Development	0.684712	-0.179644	Up	Down	UpDown
ENSMUSG00000019997	Cortex	-0.666998	Lung	-0.179644	Ageing	0.684712	-0.179644	Up	Down	UpDown
ENSMUSG00000019978	Cortex	0.1209	Lung	0.486506	Development	0.486506	0.598813	Up	Up	UpUp
ENSMUSG00000019978	Cortex	0.1209	Lung	0.598813	Ageing	0.486506	0.598813	Up	Up	UpUp
ENSMUSG00000039552	Cortex	-0.151253	Lung	0.0180187	Development	0.0180187	-0.514979	Up	Down	UpDown
ENSMUSG00000039552	Cortex	-0.151253	Lung	-0.514979	Ageing	0.0180187	-0.514979	Up	Down	UpDown
ENSMUSG00000045555	Cortex	-1.16851	Lung	0.234244	Development	0.234244	0.227549	Up	Up	UpUp
ENSMUSG00000045555	Cortex	-1.16851	Lung	0.227549	Ageing	0.234244	0.227549	Up	Up	UpUp
ENSMUSG00000078451	Cortex	0.266601	Lung	0.630656	Development	0.630656	-0.227549	Up	Down	UpDown
ENSMUSG00000078451	Cortex	0.266601	Lung	-0.227549	Ageing	0.630656	-0.227549	Up	Down	UpDown
ENSMUSG00000019920	Cortex	-1.55745	Lung	-0.936975	Development	-0.936975	-0.143715	Down	Down	DownDown
ENSMUSG00000019920	Cortex	-1.55745	Lung	-0.143715	Ageing	-0.936975	-0.143715	Down	Down	DownDown
ENSMUSG00000020092	Cortex	-1.44291	Lung	-0.991031	Development	-0.991031	0.0479051	Down	Up	DownUp
ENSMUSG00000020092	Cortex	-1.44291	Lung	0.0479051	Ageing	-0.991031	0.0479051	Down	Up	DownUp
ENSMUSG00000020077	Cortex	-2.82336	Lung	0.414431	Development	0.414431	0.131739	Up	Up	UpUp
ENSMUSG00000020077	Cortex	-2.82336	Lung	0.131739	Ageing	0.414431	0.131739	Up	Up	UpUp
ENSMUSG00000037846	Cortex	-0.62507	Lung	-0.738769	Development	-0.738769	-0.0359288	Down	Down	DownDown
ENSMUSG00000037846	Cortex	-0.62507	Lung	-0.0359288	Ageing	-0.738769	-0.0359288	Down	Down	DownDown
ENSMUSG00000037762	Cortex	-1.00897	Lung	-0.792825	Development	-0.792825	-0.335335	Down	Down	DownDown
ENSMUSG00000037762	Cortex	-1.00897	Lung	-0.335335	Ageing	-0.792825	-0.335335	Down	Down	DownDown
ENSMUSG00000033444	Cortex	-0.304641	Lung	-0.882919	Development	-0.882919	-0.479051	Down	Down	DownDown
ENSMUSG00000033444	Cortex	-0.304641	Lung	-0.479051	Ageing	-0.882919	-0.479051	Down	Down	DownDown
ENSMUSG00000000901	Cortex	-1.43616	Lung	-0.738769	Development	-0.738769	0.730552	Down	Up	DownUp
ENSMUSG00000000901	Cortex	-1.43616	Lung	0.730552	Ageing	-0.738769	0.730552	Down	Up	DownUp
ENSMUSG00000009114	Cortex	-0.887856	Lung	0.486506	Development	0.486506	0.610789	Up	Up	UpUp
ENSMUSG00000009114	Cortex	-0.887856	Lung	0.610789	Ageing	0.486506	0.610789	Up	Up	UpUp
ENSMUSG00000032714	Cortex	-1.81977	Lung	0.252262	Development	0.252262	0.718576	Up	Up	UpUp
ENSMUSG00000032714	Cortex	-1.81977	Lung	0.718576	Ageing	0.252262	0.718576	Up	Up	UpUp
ENSMUSG00000020325	Cortex	-1.27761	Lung	-0.774806	Development	-0.774806	0.455098	Down	Up	DownUp
ENSMUSG00000020325	Cortex	-1.27761	Lung	0.455098	Ageing	-0.774806	0.455098	Down	Up	DownUp
ENSMUSG00000035852	Cortex	-1.08091	Lung	0.450469	Development	0.450469	-0.706599	Up	Down	UpDown
ENSMUSG00000035852	Cortex	-1.08091	Lung	-0.706599	Ageing	0.450469	-0.706599	Up	Down	UpDown
ENSMUSG00000004665	Cortex	-1.84585	Lung	-0.846881	Development	-0.846881	0.299407	Down	Up	DownUp
ENSMUSG00000004665	Cortex	-1.84585	Lung	0.299407	Ageing	-0.846881	0.299407	Down	Up	DownUp
ENSMUSG00000020044	Cortex	-0.663608	Lung	0.846881	Development	0.846881	-0.155691	Up	Down	UpDown
ENSMUSG00000020044	Cortex	-0.663608	Lung	-0.155691	Ageing	0.846881	-0.155691	Up	Down	UpDown
ENSMUSG00000020057	Cortex	-1.32102	Lung	0.306319	Development	0.306319	0.167668	Up	Up	UpUp
ENSMUSG00000020057	Cortex	-1.32102	Lung	0.167668	Ageing	0.306319	0.167668	Up	Up	UpUp
ENSMUSG00000008398	Cortex	-1.90344	Lung	-0.954994	Development	-0.954994	0.610789	Down	Up	DownUp
ENSMUSG00000008398	Cortex	-1.90344	Lung	0.610789	Ageing	-0.954994	0.610789	Down	Up	DownUp
ENSMUSG00000019960	Cortex	-0.233579	Lung	0.630656	Development	0.630656	0.251502	Up	Up	UpUp
ENSMUSG00000019960	Cortex	-0.233579	Lung	0.251502	Ageing	0.630656	0.251502	Up	Up	UpUp
ENSMUSG00000019966	Cortex	0.371297	Lung	-0.792825	Development	-0.792825	-0.718576	Down	Down	DownDown
ENSMUSG00000019966	Cortex	0.371297	Lung	-0.718576	Ageing	-0.792825	-0.718576	Down	Down	DownDown
ENSMUSG00000044921	Cortex	-0.730375	Lung	-0.954994	Development	-0.954994	-0.359288	Down	Down	DownDown
ENSMUSG00000044921	Cortex	-0.730375	Lung	-0.359288	Ageing	-0.954994	-0.359288	Down	Down	DownDown
ENSMUSG00000034127	Cortex	-1.58506	Lung	-0.450469	Development	-0.450469	0.19162	Down	Up	DownUp
ENSMUSG00000034127	Cortex	-1.58506	Lung	0.19162	Ageing	-0.450469	0.19162	Down	Up	DownUp
ENSMUSG00000020154	Cortex	-1.29884	Lung	0.522544	Development	0.522544	-0.562884	Up	Down	UpDown
ENSMUSG00000020154	Cortex	-1.29884	Lung	-0.562884	Ageing	0.522544	-0.562884	Up	Down	UpDown
ENSMUSG00000069515	Cortex	-1.03004	Lung	0.540562	Development	0.540562	0.299407	Up	Up	UpUp
ENSMUSG00000069515	Cortex	-1.03004	Lung	0.299407	Ageing	0.540562	0.299407	Up	Up	UpUp
ENSMUSG00000069516	Cortex	-2.40138	Lung	0.252262	Development	0.252262	0.826362	Up	Up	UpUp
ENSMUSG00000069516	Cortex	-2.40138	Lung	0.826362	Ageing	0.252262	0.826362	Up	Up	UpUp
ENSMUSG00000020183	Cortex	-1.62899	Lung	0.972727	Development	0.972727	0.562884	Up	Up	UpUp
ENSMUSG00000020183	Cortex	-1.62899	Lung	0.562884	Ageing	0.972727	0.562884	Up	Up	UpUp
ENSMUSG00000052681	Cortex	-1.5329	Lung	-0.900937	Development	-0.900937	-0.28743	Down	Down	DownDown
ENSMUSG00000052681	Cortex	-1.5329	Lung	-0.28743	Ageing	-0.900937	-0.28743	Down	Down	DownDown
ENSMUSG00000078429	Cortex	-1.72464	Lung	0.702731	Development	0.702731	-0.395217	Up	Down	UpDown
ENSMUSG00000078429	Cortex	-1.72464	Lung	-0.395217	Ageing	0.702731	-0.395217	Up	Down	UpDown
ENSMUSG00000040054	Cortex	-0.476098	Lung	0.558581	Development	0.558581	-0.347312	Up	Down	UpDown
ENSMUSG00000040054	Cortex	-0.476098	Lung	-0.347312	Ageing	0.558581	-0.347312	Up	Down	UpDown
ENSMUSG00000090841	Cortex	-0.160147	Lung	0.666694	Development	0.666694	-0.795181	Up	Down	UpDown
ENSMUSG00000090841	Cortex	-0.160147	Lung	-0.795181	Ageing	0.666694	-0.795181	Up	Down	UpDown
ENSMUSG00000025354	Cortex	-0.363666	Lung	0.0900937	Development	0.0900937	-0.0479051	Up	Down	UpDown
ENSMUSG00000025354	Cortex	-0.363666	Lung	-0.0479051	Ageing	0.0900937	-0.0479051	Up	Down	UpDown
ENSMUSG00000054986	Cortex	-0.783734	Lung	0.108112	Development	0.108112	0.335335	Up	Up	UpUp
ENSMUSG00000054986	Cortex	-0.783734	Lung	0.335335	Ageing	0.108112	0.335335	Up	Up	UpUp
ENSMUSG00000003581	Cortex	-0.113154	Lung	-0.846881	Development	-0.846881	0.239525	Down	Up	DownUp
ENSMUSG00000003581	Cortex	-0.113154	Lung	0.239525	Ageing	-0.846881	0.239525	Down	Up	DownUp
ENSMUSG00000020469	Cortex	-0.920746	Lung	-0.522544	Development	-0.522544	-0.491027	Down	Down	DownDown
ENSMUSG00000020469	Cortex	-0.920746	Lung	-0.491027	Ageing	-0.522544	-0.491027	Down	Down	DownDown
ENSMUSG00000020422	Cortex	-0.57056	Lung	0.991031	Development	0.991031	-0.299407	Up	Down	UpDown
ENSMUSG00000020422	Cortex	-0.57056	Lung	-0.299407	Ageing	0.991031	-0.299407	Up	Down	UpDown
ENSMUSG00000020160	Cortex	-1.44491	Lung	0.270281	Development	0.270281	-0.179644	Up	Down	UpDown
ENSMUSG00000020160	Cortex	-1.44491	Lung	-0.179644	Ageing	0.270281	-0.179644	Up	Down	UpDown
ENSMUSG00000049800	Cortex	-1.40446	Lung	-0.900937	Development	-0.900937	-0.778457	Down	Down	DownDown
ENSMUSG00000049800	Cortex	-1.40446	Lung	-0.778457	Ageing	-0.900937	-0.778457	Down	Down	DownDown
ENSMUSG00000049811	Cortex	-1.21509	Lung	0.216225	Development	0.216225	-0.0718576	Up	Down	UpDown
ENSMUSG00000049811	Cortex	-1.21509	Lung	-0.0718576	Ageing	0.216225	-0.0718576	Up	Down	UpDown
ENSMUSG00000020155	Cortex	-0.806034	Lung	0.558581	Development	0.558581	0	Up	Down	UpDown
ENSMUSG00000020155	Cortex	-0.806034	Lung	0	Ageing	0.558581	0	Up	Down	UpDown
ENSMUSG00000064057	Cortex	-0.762913	Lung	0.900937	Development	0.900937	0.251502	Up	Up	UpUp
ENSMUSG00000064057	Cortex	-0.762913	Lung	0.251502	Ageing	0.900937	0.251502	Up	Up	UpUp
ENSMUSG00000056598	Cortex	0.358704	Lung	0.828862	Development	0.828862	0.311383	Up	Up	UpUp
ENSMUSG00000056598	Cortex	0.358704	Lung	0.311383	Ageing	0.828862	0.311383	Up	Up	UpUp
ENSMUSG00000005417	Cortex	-0.143013	Lung	-0.522544	Development	-0.522544	-0.946125	Down	Down	DownDown
ENSMUSG00000005417	Cortex	-0.143013	Lung	-0.946125	Ageing	-0.522544	-0.946125	Down	Down	DownDown
ENSMUSG00000004837	Cortex	-1.62911	Lung	-0.342356	Development	-0.342356	0.682647	Down	Up	DownUp
ENSMUSG00000004837	Cortex	-1.62911	Lung	0.682647	Ageing	-0.342356	0.682647	Down	Up	DownUp
ENSMUSG00000042436	Cortex	-1.51382	Lung	-0.900937	Development	-0.900937	-0.323359	Down	Down	DownDown
ENSMUSG00000042436	Cortex	-1.51382	Lung	-0.323359	Ageing	-0.900937	-0.323359	Down	Down	DownDown
ENSMUSG00000018500	Cortex	-0.338414	Lung	0.522544	Development	0.522544	-0.514979	Up	Down	UpDown
ENSMUSG00000018500	Cortex	-0.338414	Lung	-0.514979	Ageing	0.522544	-0.514979	Up	Down	UpDown
ENSMUSG00000056752	Cortex	0.43153	Lung	-0.450469	Development	-0.450469	-0.215573	Down	Down	DownDown
ENSMUSG00000056752	Cortex	0.43153	Lung	-0.215573	Ageing	-0.450469	-0.215573	Down	Down	DownDown
ENSMUSG00000020904	Cortex	-0.479707	Lung	-0.342356	Development	-0.342356	-0.514979	Down	Down	DownDown
ENSMUSG00000020904	Cortex	-0.479707	Lung	-0.514979	Ageing	-0.342356	-0.514979	Down	Down	DownDown
ENSMUSG00000052921	Cortex	-0.320846	Lung	0.666694	Development	0.666694	-0.107786	Up	Down	UpDown
ENSMUSG00000052921	Cortex	-0.320846	Lung	-0.107786	Ageing	0.666694	-0.107786	Up	Down	UpDown
ENSMUSG00000089669	Cortex	-1.29333	Lung	0.702731	Development	0.702731	0.323359	Up	Up	UpUp
ENSMUSG00000089669	Cortex	-1.29333	Lung	0.323359	Ageing	0.702731	0.323359	Up	Up	UpUp
ENSMUSG00000019461	Cortex	-1.35844	Lung	-0.936975	Development	-0.936975	-0.155691	Down	Down	DownDown
ENSMUSG00000019461	Cortex	-1.35844	Lung	-0.155691	Ageing	-0.936975	-0.155691	Down	Down	DownDown
[truncated: 6,506 more rows]

## Sheet: sdata4
geneid	tissue	ES	spec	rho	period	Development	Ageing	dev	age	rev
[truncated: 6,128 more rows]

[truncated: 4 more sheets: sdata5, sdata6, sdata7, sdata8]
