# Supplementary material for: Inter-tissue convergence of gene expression during ageing suggests age-related loss of tissue and cellular identity
Source: eLife journal article supplement (doi:10.7554/elife.68048), 2022-01-31
Supplement: supp [file elife-68048-supp-v1.zip › elife_poa_e68048_Figure_5_figure_supplement_1.pdf]

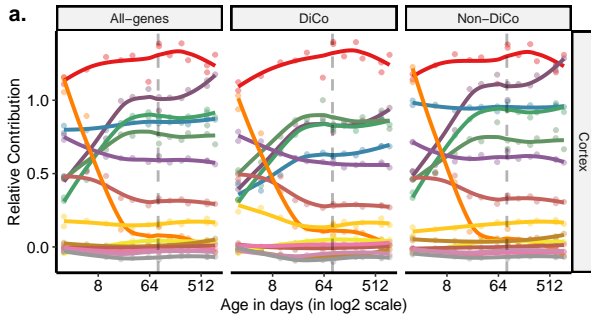

Cell Type

- neuron
- oligodendrocyte
- interneuron
- astrocyte
- medium spiny neuron
- endothelial cell
- oligodendrocyte precursor cell
- neuronal stem cell
- brain pericyte
- Bergmann glial cell
- T cell
- mature NK T cell
- CD8-positive, alpha-beta T cell
- ependymal cell
- neuroepithelial cell

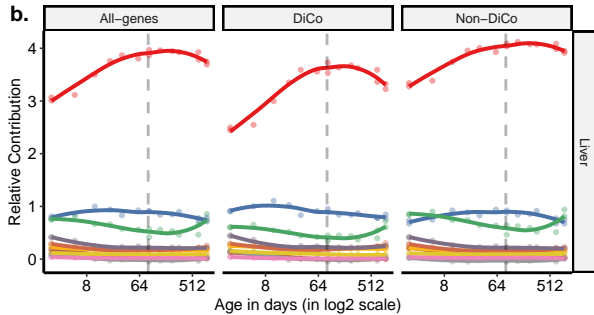

Cell Type

- hepatocyte
- endothelial cell of hepatic sinusoid
- Kupffer cell
- myeloid leukocyte
- B cell
- mature NK T cell
- NK cell
- T cell
- CD4-positive, alpha-beta T cell
- neutrophil

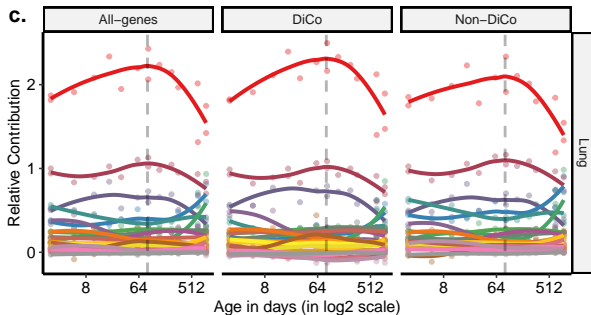

Cell Type

- bronchial smooth muscle cell
- type II pneumocyte
- fibroblast of lung
- classical monocyte
- adventitial cell
- B cell
- club cell of bronchiole
- vein endothelial cell
- pulmonary interstitial fibroblast
- ciliated columnar cell of tracheobronchial tree
- myeloid dendritic cell
- pericyte cell
- smooth muscle cell of the pulmonary artery
- dendritic cell
- non-classical monocyte
- respiratory basal cell
- CD8-positive, alpha-beta T cell
- neutrophil
- endothelial cell of lymphatic vessel
- NK cell
- leukocyte
- T cell
- CD4-positive, alpha-beta T cell
- regulatory T cell

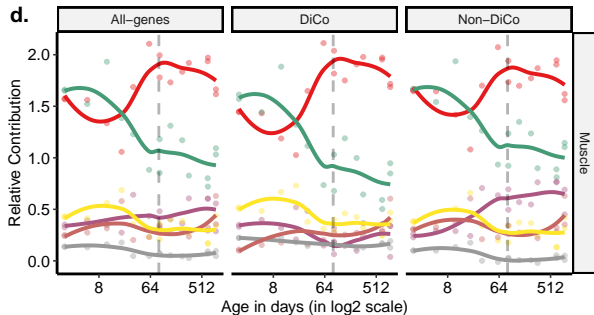

Cell Type

- skeletal muscle satellite cell
- mesenchymal stem cell
- endothelial cell
- macrophage
- B cell
- T cell
