# Supplementary material for: Inter-tissue convergence of gene expression during ageing suggests age-related loss of tissue and cellular identity
Source: eLife journal article supplement (doi:10.7554/elife.68048), 2022-01-31
Supplement: supp [file elife-68048-supp-v1.zip › elife_poa_e68048_Figure_5_source_data_1.xlsx]

## Sheet: sdata0
sheet		relevant figure
sdata1	Contribution of tissue composition and cell-autonomous changes to the DiCo pattern: relative contribution change	f5a
sdata2	Contribution of tissue composition and cell-autonomous changes to the DiCo pattern: density plot	f5b
sdata3	Contribution of tissue composition and cell-autonomous changes to the DiCo pattern: correlation change	f5b
sdata4	Age-related changes in cell type proportions calculated using DiCo and non-DiCo genes	fs1
sdata5	Permutation-based comparison between DiCo- and non-Dico- related cell type proportion changes with age in the cortex	fs2
sdata6	Permutation-based comparison between DiCo- and non-Dico- related cell type proportion changes with age in the liver	fs3
sdata7	Permutation-based comparison between DiCo- and non-Dico- related cell type proportion changes with age in the lung	fs4
sdata8	Permutation-based comparison between DiCo- and non-Dico- related cell type proportion changes with age in the muscle.	fs5
sdata9	Intra-tissue CoV changes between cell types using Tabula Muris Senis dataset	fs6

## Sheet: sdata1
cell type	id	proportion	tissue	Geneset	age	period	rho	p.val
neuron	s1	1.12297	Cortex	DiCo	2	ageing	-0.65	0.083
neuron	s1	1.12297	Cortex	DiCo	2	development	0.63	0.129
neuron	s2	1.0662	Cortex	DiCo	2	ageing	-0.65	0.083
neuron	s2	1.0662	Cortex	DiCo	2	development	0.63	0.129
neuron	s3	1.16489	Cortex	DiCo	5	ageing	-0.65	0.083
neuron	s3	1.16489	Cortex	DiCo	5	development	0.63	0.129
neuron	s4	1.25859	Cortex	DiCo	11	ageing	-0.65	0.083
neuron	s4	1.25859	Cortex	DiCo	11	development	0.63	0.129
neuron	s5	1.27105	Cortex	DiCo	20	ageing	-0.65	0.083
neuron	s5	1.27105	Cortex	DiCo	20	development	0.63	0.129
neuron	s6	1.32451	Cortex	DiCo	32	ageing	-0.65	0.083
neuron	s6	1.32451	Cortex	DiCo	32	development	0.63	0.129
neuron	s7	1.15397	Cortex	DiCo	61	ageing	-0.65	0.083
neuron	s7	1.15397	Cortex	DiCo	61	development	0.63	0.129
neuron	s8	1.38266	Cortex	DiCo	93	ageing	-0.65	0.083
neuron	s8	1.38266	Cortex	DiCo	93	development	0.63	0.129
neuron	s9	1.39728	Cortex	DiCo	93	ageing	-0.65	0.083
neuron	s9	1.39728	Cortex	DiCo	93	development	0.63	0.129
neuron	s10	1.29892	Cortex	DiCo	144	ageing	-0.65	0.083
neuron	s10	1.29892	Cortex	DiCo	144	development	0.63	0.129
neuron	s11	1.39624	Cortex	DiCo	232	ageing	-0.65	0.083
neuron	s11	1.39624	Cortex	DiCo	232	development	0.63	0.129
neuron	s12	1.28439	Cortex	DiCo	303	ageing	-0.65	0.083
neuron	s12	1.28439	Cortex	DiCo	303	development	0.63	0.129
neuron	s13	1.25697	Cortex	DiCo	649	ageing	-0.65	0.083
neuron	s13	1.25697	Cortex	DiCo	649	development	0.63	0.129
neuron	s14	1.19064	Cortex	DiCo	654	ageing	-0.65	0.083
neuron	s14	1.19064	Cortex	DiCo	654	development	0.63	0.129
neuron	s15	1.30964	Cortex	DiCo	904	ageing	-0.65	0.083
neuron	s15	1.30964	Cortex	DiCo	904	development	0.63	0.129
bronchial smooth muscle cell	s16	1.80848	Lung	DiCo	2	ageing	-0.86	0.003
bronchial smooth muscle cell	s16	1.80848	Lung	DiCo	2	development	0.81	0.027
bronchial smooth muscle cell	s17	1.8249	Lung	DiCo	2	ageing	-0.86	0.003
bronchial smooth muscle cell	s17	1.8249	Lung	DiCo	2	development	0.81	0.027
bronchial smooth muscle cell	s18	1.90946	Lung	DiCo	5	ageing	-0.86	0.003
bronchial smooth muscle cell	s18	1.90946	Lung	DiCo	5	development	0.81	0.027
bronchial smooth muscle cell	s19	2.11097	Lung	DiCo	11	ageing	-0.86	0.003
bronchial smooth muscle cell	s19	2.11097	Lung	DiCo	11	development	0.81	0.027
bronchial smooth muscle cell	s20	2.39412	Lung	DiCo	20	ageing	-0.86	0.003
bronchial smooth muscle cell	s20	2.39412	Lung	DiCo	20	development	0.81	0.027
bronchial smooth muscle cell	s21	2.0761	Lung	DiCo	32	ageing	-0.86	0.003
bronchial smooth muscle cell	s21	2.0761	Lung	DiCo	32	development	0.81	0.027
bronchial smooth muscle cell	s22	2.26696	Lung	DiCo	61	ageing	-0.86	0.003
bronchial smooth muscle cell	s22	2.26696	Lung	DiCo	61	development	0.81	0.027
bronchial smooth muscle cell	s23	2.1634	Lung	DiCo	93	ageing	-0.86	0.003
bronchial smooth muscle cell	s23	2.1634	Lung	DiCo	93	development	0.81	0.027
bronchial smooth muscle cell	s24	2.49615	Lung	DiCo	93	ageing	-0.86	0.003
bronchial smooth muscle cell	s24	2.49615	Lung	DiCo	93	development	0.81	0.027
bronchial smooth muscle cell	s25	2.33059	Lung	DiCo	144	ageing	-0.86	0.003
bronchial smooth muscle cell	s25	2.33059	Lung	DiCo	144	development	0.81	0.027
bronchial smooth muscle cell	s26	2.23713	Lung	DiCo	232	ageing	-0.86	0.003
bronchial smooth muscle cell	s26	2.23713	Lung	DiCo	232	development	0.81	0.027
bronchial smooth muscle cell	s27	2.07265	Lung	DiCo	303	ageing	-0.86	0.003
bronchial smooth muscle cell	s27	2.07265	Lung	DiCo	303	development	0.81	0.027
bronchial smooth muscle cell	s28	2.12326	Lung	DiCo	649	ageing	-0.86	0.003
bronchial smooth muscle cell	s28	2.12326	Lung	DiCo	649	development	0.81	0.027
bronchial smooth muscle cell	s29	1.40069	Lung	DiCo	654	ageing	-0.86	0.003
bronchial smooth muscle cell	s29	1.40069	Lung	DiCo	654	development	0.81	0.027
bronchial smooth muscle cell	s30	1.4721	Lung	DiCo	904	ageing	-0.86	0.003
bronchial smooth muscle cell	s30	1.4721	Lung	DiCo	904	development	0.81	0.027
bronchial smooth muscle cell	s31	1.8941	Lung	DiCo	904	ageing	-0.86	0.003
bronchial smooth muscle cell	s31	1.8941	Lung	DiCo	904	development	0.81	0.027
hepatocyte	s32	2.44414	Liver	DiCo	2	ageing	-0.77	0.015
hepatocyte	s32	2.44414	Liver	DiCo	2	development	0.95	0.001
hepatocyte	s33	2.49836	Liver	DiCo	2	ageing	-0.77	0.015
hepatocyte	s33	2.49836	Liver	DiCo	2	development	0.95	0.001
hepatocyte	s34	2.54759	Liver	DiCo	5	ageing	-0.77	0.015
hepatocyte	s34	2.54759	Liver	DiCo	5	development	0.95	0.001
hepatocyte	s35	2.99608	Liver	DiCo	11	ageing	-0.77	0.015
hepatocyte	s35	2.99608	Liver	DiCo	11	development	0.95	0.001
hepatocyte	s36	3.35203	Liver	DiCo	20	ageing	-0.77	0.015
hepatocyte	s36	3.35203	Liver	DiCo	20	development	0.95	0.001
hepatocyte	s37	3.59151	Liver	DiCo	32	ageing	-0.77	0.015
hepatocyte	s37	3.59151	Liver	DiCo	32	development	0.95	0.001
hepatocyte	s38	3.55632	Liver	DiCo	61	ageing	-0.77	0.015
hepatocyte	s38	3.55632	Liver	DiCo	61	development	0.95	0.001
hepatocyte	s39	3.53026	Liver	DiCo	93	ageing	-0.77	0.015
hepatocyte	s39	3.53026	Liver	DiCo	93	development	0.95	0.001
hepatocyte	s40	3.72849	Liver	DiCo	93	ageing	-0.77	0.015
hepatocyte	s40	3.72849	Liver	DiCo	93	development	0.95	0.001
hepatocyte	s41	3.63334	Liver	DiCo	144	ageing	-0.77	0.015
hepatocyte	s41	3.63334	Liver	DiCo	144	development	0.95	0.001
hepatocyte	s42	3.67432	Liver	DiCo	232	ageing	-0.77	0.015
hepatocyte	s42	3.67432	Liver	DiCo	232	development	0.95	0.001
hepatocyte	s43	3.62378	Liver	DiCo	303	ageing	-0.77	0.015
hepatocyte	s43	3.62378	Liver	DiCo	303	development	0.95	0.001
hepatocyte	s44	3.59228	Liver	DiCo	649	ageing	-0.77	0.015
hepatocyte	s44	3.59228	Liver	DiCo	649	development	0.95	0.001
hepatocyte	s45	3.36065	Liver	DiCo	654	ageing	-0.77	0.015
hepatocyte	s45	3.36065	Liver	DiCo	654	development	0.95	0.001
hepatocyte	s46	3.22643	Liver	DiCo	904	ageing	-0.77	0.015
hepatocyte	s46	3.22643	Liver	DiCo	904	development	0.95	0.001
hepatocyte	s47	3.32492	Liver	DiCo	904	ageing	-0.77	0.015
hepatocyte	s47	3.32492	Liver	DiCo	904	development	0.95	0.001
skeletal muscle satellite cell	s48	1.44955	Muscle	DiCo	2	ageing	-0.44	0.24
skeletal muscle satellite cell	s48	1.44955	Muscle	DiCo	2	development	0.31	0.504
skeletal muscle satellite cell	s49	1.44208	Muscle	DiCo	2	ageing	-0.44	0.24
skeletal muscle satellite cell	s49	1.44208	Muscle	DiCo	2	development	0.31	0.504
skeletal muscle satellite cell	s50	1.43177	Muscle	DiCo	5	ageing	-0.44	0.24
skeletal muscle satellite cell	s50	1.43177	Muscle	DiCo	5	development	0.31	0.504
skeletal muscle satellite cell	s51	1.18766	Muscle	DiCo	11	ageing	-0.44	0.24
skeletal muscle satellite cell	s51	1.18766	Muscle	DiCo	11	development	0.31	0.504
skeletal muscle satellite cell	s52	1.02584	Muscle	DiCo	20	ageing	-0.44	0.24
skeletal muscle satellite cell	s52	1.02584	Muscle	DiCo	20	development	0.31	0.504
skeletal muscle satellite cell	s53	1.64886	Muscle	DiCo	32	ageing	-0.44	0.24
skeletal muscle satellite cell	s53	1.64886	Muscle	DiCo	32	development	0.31	0.504
skeletal muscle satellite cell	s54	2.11292	Muscle	DiCo	61	ageing	-0.44	0.24
skeletal muscle satellite cell	s54	2.11292	Muscle	DiCo	61	development	0.31	0.504
skeletal muscle satellite cell	s55	1.81713	Muscle	DiCo	93	ageing	-0.44	0.24
skeletal muscle satellite cell	s55	1.81713	Muscle	DiCo	93	development	0.31	0.504
skeletal muscle satellite cell	s56	2.03853	Muscle	DiCo	93	ageing	-0.44	0.24
skeletal muscle satellite cell	s56	2.03853	Muscle	DiCo	93	development	0.31	0.504
skeletal muscle satellite cell	s57	1.75029	Muscle	DiCo	144	ageing	-0.44	0.24
skeletal muscle satellite cell	s57	1.75029	Muscle	DiCo	144	development	0.31	0.504
skeletal muscle satellite cell	s58	1.90665	Muscle	DiCo	232	ageing	-0.44	0.24
skeletal muscle satellite cell	s58	1.90665	Muscle	DiCo	232	development	0.31	0.504
skeletal muscle satellite cell	s59	1.97838	Muscle	DiCo	303	ageing	-0.44	0.24
skeletal muscle satellite cell	s59	1.97838	Muscle	DiCo	303	development	0.31	0.504
skeletal muscle satellite cell	s60	1.9536	Muscle	DiCo	649	ageing	-0.44	0.24
skeletal muscle satellite cell	s60	1.9536	Muscle	DiCo	649	development	0.31	0.504
skeletal muscle satellite cell	s61	1.97188	Muscle	DiCo	654	ageing	-0.44	0.24
skeletal muscle satellite cell	s61	1.97188	Muscle	DiCo	654	development	0.31	0.504
skeletal muscle satellite cell	s62	1.6867	Muscle	DiCo	904	ageing	-0.44	0.24
skeletal muscle satellite cell	s62	1.6867	Muscle	DiCo	904	development	0.31	0.504
skeletal muscle satellite cell	s63	1.71665	Muscle	DiCo	904	ageing	-0.44	0.24
skeletal muscle satellite cell	s63	1.71665	Muscle	DiCo	904	development	0.31	0.504
neuron	s1	1.17785	Cortex	Non-DiCo	2	ageing	-0.59	0.126
neuron	s1	1.17785	Cortex	Non-DiCo	2	development	0.13	0.788
neuron	s2	1.14103	Cortex	Non-DiCo	2	ageing	-0.59	0.126
neuron	s2	1.14103	Cortex	Non-DiCo	2	development	0.13	0.788
neuron	s3	1.23782	Cortex	Non-DiCo	5	ageing	-0.59	0.126
neuron	s3	1.23782	Cortex	Non-DiCo	5	development	0.13	0.788
neuron	s4	1.31417	Cortex	Non-DiCo	11	ageing	-0.59	0.126
neuron	s4	1.31417	Cortex	Non-DiCo	11	development	0.13	0.788
neuron	s5	1.27386	Cortex	Non-DiCo	20	ageing	-0.59	0.126
neuron	s5	1.27386	Cortex	Non-DiCo	20	development	0.13	0.788
neuron	s6	1.29249	Cortex	Non-DiCo	32	ageing	-0.59	0.126
neuron	s6	1.29249	Cortex	Non-DiCo	32	development	0.13	0.788
neuron	s7	1.11204	Cortex	Non-DiCo	61	ageing	-0.59	0.126
neuron	s7	1.11204	Cortex	Non-DiCo	61	development	0.13	0.788
neuron	s8	1.35799	Cortex	Non-DiCo	93	ageing	-0.59	0.126
neuron	s8	1.35799	Cortex	Non-DiCo	93	development	0.13	0.788
neuron	s9	1.38019	Cortex	Non-DiCo	93	ageing	-0.59	0.126
neuron	s9	1.38019	Cortex	Non-DiCo	93	development	0.13	0.788
neuron	s10	1.30733	Cortex	Non-DiCo	144	ageing	-0.59	0.126
neuron	s10	1.30733	Cortex	Non-DiCo	144	development	0.13	0.788
neuron	s11	1.38248	Cortex	Non-DiCo	232	ageing	-0.59	0.126
neuron	s11	1.38248	Cortex	Non-DiCo	232	development	0.13	0.788
neuron	s12	1.26564	Cortex	Non-DiCo	303	ageing	-0.59	0.126
neuron	s12	1.26564	Cortex	Non-DiCo	303	development	0.13	0.788
neuron	s13	1.23013	Cortex	Non-DiCo	649	ageing	-0.59	0.126
neuron	s13	1.23013	Cortex	Non-DiCo	649	development	0.13	0.788
neuron	s14	1.19011	Cortex	Non-DiCo	654	ageing	-0.59	0.126
neuron	s14	1.19011	Cortex	Non-DiCo	654	development	0.13	0.788
neuron	s15	1.30934	Cortex	Non-DiCo	904	ageing	-0.59	0.126
neuron	s15	1.30934	Cortex	Non-DiCo	904	development	0.13	0.788
bronchial smooth muscle cell	s16	1.75106	Lung	Non-DiCo	2	ageing	-0.86	0.003
bronchial smooth muscle cell	s16	1.75106	Lung	Non-DiCo	2	development	0.49	0.268
bronchial smooth muscle cell	s17	1.85294	Lung	Non-DiCo	2	ageing	-0.86	0.003
bronchial smooth muscle cell	s17	1.85294	Lung	Non-DiCo	2	development	0.49	0.268
bronchial smooth muscle cell	s18	1.83594	Lung	Non-DiCo	5	ageing	-0.86	0.003
bronchial smooth muscle cell	s18	1.83594	Lung	Non-DiCo	5	development	0.49	0.268
bronchial smooth muscle cell	s19	1.985	Lung	Non-DiCo	11	ageing	-0.86	0.003
bronchial smooth muscle cell	s19	1.985	Lung	Non-DiCo	11	development	0.49	0.268
bronchial smooth muscle cell	s20	2.22935	Lung	Non-DiCo	20	ageing	-0.86	0.003
bronchial smooth muscle cell	s20	2.22935	Lung	Non-DiCo	20	development	0.49	0.268
bronchial smooth muscle cell	s21	1.77821	Lung	Non-DiCo	32	ageing	-0.86	0.003
bronchial smooth muscle cell	s21	1.77821	Lung	Non-DiCo	32	development	0.49	0.268
bronchial smooth muscle cell	s22	2.0843	Lung	Non-DiCo	61	ageing	-0.86	0.003
bronchial smooth muscle cell	s22	2.0843	Lung	Non-DiCo	61	development	0.49	0.268
bronchial smooth muscle cell	s23	1.91233	Lung	Non-DiCo	93	ageing	-0.86	0.003
bronchial smooth muscle cell	s23	1.91233	Lung	Non-DiCo	93	development	0.49	0.268
bronchial smooth muscle cell	s24	2.33463	Lung	Non-DiCo	93	ageing	-0.86	0.003
bronchial smooth muscle cell	s24	2.33463	Lung	Non-DiCo	93	development	0.49	0.268
bronchial smooth muscle cell	s25	2.10502	Lung	Non-DiCo	144	ageing	-0.86	0.003
bronchial smooth muscle cell	s25	2.10502	Lung	Non-DiCo	144	development	0.49	0.268
bronchial smooth muscle cell	s26	2.01229	Lung	Non-DiCo	232	ageing	-0.86	0.003
bronchial smooth muscle cell	s26	2.01229	Lung	Non-DiCo	232	development	0.49	0.268
bronchial smooth muscle cell	s27	1.79973	Lung	Non-DiCo	303	ageing	-0.86	0.003
bronchial smooth muscle cell	s27	1.79973	Lung	Non-DiCo	303	development	0.49	0.268
bronchial smooth muscle cell	s28	1.84448	Lung	Non-DiCo	649	ageing	-0.86	0.003
bronchial smooth muscle cell	s28	1.84448	Lung	Non-DiCo	649	development	0.49	0.268
bronchial smooth muscle cell	s29	1.19134	Lung	Non-DiCo	654	ageing	-0.86	0.003
bronchial smooth muscle cell	s29	1.19134	Lung	Non-DiCo	654	development	0.49	0.268
bronchial smooth muscle cell	s30	1.33489	Lung	Non-DiCo	904	ageing	-0.86	0.003
bronchial smooth muscle cell	s30	1.33489	Lung	Non-DiCo	904	development	0.49	0.268
bronchial smooth muscle cell	s31	1.54558	Lung	Non-DiCo	904	ageing	-0.86	0.003
bronchial smooth muscle cell	s31	1.54558	Lung	Non-DiCo	904	development	0.49	0.268
hepatocyte	s32	3.27588	Liver	Non-DiCo	2	ageing	-0.71	0.031
hepatocyte	s32	3.27588	Liver	Non-DiCo	2	development	0.88	0.008
hepatocyte	s33	3.34065	Liver	Non-DiCo	2	ageing	-0.71	0.031
hepatocyte	s33	3.34065	Liver	Non-DiCo	2	development	0.88	0.008
hepatocyte	s34	3.38451	Liver	Non-DiCo	5	ageing	-0.71	0.031
hepatocyte	s34	3.38451	Liver	Non-DiCo	5	development	0.88	0.008
hepatocyte	s35	3.74045	Liver	Non-DiCo	11	ageing	-0.71	0.031
hepatocyte	s35	3.74045	Liver	Non-DiCo	11	development	0.88	0.008
hepatocyte	s36	3.95566	Liver	Non-DiCo	20	ageing	-0.71	0.031
hepatocyte	s36	3.95566	Liver	Non-DiCo	20	development	0.88	0.008
hepatocyte	s37	4.00478	Liver	Non-DiCo	32	ageing	-0.71	0.031
hepatocyte	s37	4.00478	Liver	Non-DiCo	32	development	0.88	0.008
hepatocyte	s38	3.92833	Liver	Non-DiCo	61	ageing	-0.71	0.031
hepatocyte	s38	3.92833	Liver	Non-DiCo	61	development	0.88	0.008
hepatocyte	s39	4.03265	Liver	Non-DiCo	93	ageing	-0.71	0.031
hepatocyte	s39	4.03265	Liver	Non-DiCo	93	development	0.88	0.008
hepatocyte	s40	4.08988	Liver	Non-DiCo	93	ageing	-0.71	0.031
hepatocyte	s40	4.08988	Liver	Non-DiCo	93	development	0.88	0.008
hepatocyte	s41	4.1202	Liver	Non-DiCo	144	ageing	-0.71	0.031
hepatocyte	s41	4.1202	Liver	Non-DiCo	144	development	0.88	0.008
hepatocyte	s42	4.07805	Liver	Non-DiCo	232	ageing	-0.71	0.031
hepatocyte	s42	4.07805	Liver	Non-DiCo	232	development	0.88	0.008
hepatocyte	s43	4.07289	Liver	Non-DiCo	303	ageing	-0.71	0.031
hepatocyte	s43	4.07289	Liver	Non-DiCo	303	development	0.88	0.008
hepatocyte	s44	4.08558	Liver	Non-DiCo	649	ageing	-0.71	0.031
hepatocyte	s44	4.08558	Liver	Non-DiCo	649	development	0.88	0.008
hepatocyte	s45	3.98569	Liver	Non-DiCo	654	ageing	-0.71	0.031
hepatocyte	s45	3.98569	Liver	Non-DiCo	654	development	0.88	0.008
hepatocyte	s46	3.91327	Liver	Non-DiCo	904	ageing	-0.71	0.031
hepatocyte	s46	3.91327	Liver	Non-DiCo	904	development	0.88	0.008
hepatocyte	s47	3.95153	Liver	Non-DiCo	904	ageing	-0.71	0.031
hepatocyte	s47	3.95153	Liver	Non-DiCo	904	development	0.88	0.008
skeletal muscle satellite cell	s48	1.65413	Muscle	Non-DiCo	2	ageing	-0.29	0.442
skeletal muscle satellite cell	s48	1.65413	Muscle	Non-DiCo	2	development	0.31	0.504
skeletal muscle satellite cell	s49	1.64614	Muscle	Non-DiCo	2	ageing	-0.29	0.442
skeletal muscle satellite cell	s49	1.64614	Muscle	Non-DiCo	2	development	0.31	0.504
skeletal muscle satellite cell	s50	1.64439	Muscle	Non-DiCo	5	ageing	-0.29	0.442
skeletal muscle satellite cell	s50	1.64439	Muscle	Non-DiCo	5	development	0.31	0.504
skeletal muscle satellite cell	s51	1.41757	Muscle	Non-DiCo	11	ageing	-0.29	0.442
skeletal muscle satellite cell	s51	1.41757	Muscle	Non-DiCo	11	development	0.31	0.504
skeletal muscle satellite cell	s52	1.08038	Muscle	Non-DiCo	20	ageing	-0.29	0.442
skeletal muscle satellite cell	s52	1.08038	Muscle	Non-DiCo	20	development	0.31	0.504
skeletal muscle satellite cell	s53	1.69966	Muscle	Non-DiCo	32	ageing	-0.29	0.442
skeletal muscle satellite cell	s53	1.69966	Muscle	Non-DiCo	32	development	0.31	0.504
skeletal muscle satellite cell	s54	2.07279	Muscle	Non-DiCo	61	ageing	-0.29	0.442
skeletal muscle satellite cell	s54	2.07279	Muscle	Non-DiCo	61	development	0.31	0.504
skeletal muscle satellite cell	s55	1.73488	Muscle	Non-DiCo	93	ageing	-0.29	0.442
skeletal muscle satellite cell	s55	1.73488	Muscle	Non-DiCo	93	development	0.31	0.504
skeletal muscle satellite cell	s56	1.94022	Muscle	Non-DiCo	93	ageing	-0.29	0.442
skeletal muscle satellite cell	s56	1.94022	Muscle	Non-DiCo	93	development	0.31	0.504
skeletal muscle satellite cell	s57	1.69855	Muscle	Non-DiCo	144	ageing	-0.29	0.442
skeletal muscle satellite cell	s57	1.69855	Muscle	Non-DiCo	144	development	0.31	0.504
skeletal muscle satellite cell	s58	1.77163	Muscle	Non-DiCo	232	ageing	-0.29	0.442
skeletal muscle satellite cell	s58	1.77163	Muscle	Non-DiCo	232	development	0.31	0.504
skeletal muscle satellite cell	s59	1.86914	Muscle	Non-DiCo	303	ageing	-0.29	0.442
skeletal muscle satellite cell	s59	1.86914	Muscle	Non-DiCo	303	development	0.31	0.504
skeletal muscle satellite cell	s60	1.90407	Muscle	Non-DiCo	649	ageing	-0.29	0.442
skeletal muscle satellite cell	s60	1.90407	Muscle	Non-DiCo	649	development	0.31	0.504
skeletal muscle satellite cell	s61	1.94638	Muscle	Non-DiCo	654	ageing	-0.29	0.442
skeletal muscle satellite cell	s61	1.94638	Muscle	Non-DiCo	654	development	0.31	0.504
skeletal muscle satellite cell	s62	1.55801	Muscle	Non-DiCo	904	ageing	-0.29	0.442
skeletal muscle satellite cell	s62	1.55801	Muscle	Non-DiCo	904	development	0.31	0.504
skeletal muscle satellite cell	s63	1.61915	Muscle	Non-DiCo	904	ageing	-0.29	0.442
skeletal muscle satellite cell	s63	1.61915	Muscle	Non-DiCo	904	development	0.31	0.504

## Sheet: sdata2
2nd cell type	2nd tissue	1st cell type	1st tissue	Correlation	age	Similarity	var
endothelial cell of hepatic sinusoid	liver	bronchial smooth muscle cell	Lung	0.75287	m3	Maximum	Similarity Distribution
endothelial cell	muscle	bronchial smooth muscle cell	Lung	0.745931	m3	Maximum	Similarity Distribution
endothelial cell	brain	bronchial smooth muscle cell	Lung	0.819295	m3	Maximum	Similarity Distribution
endothelial cell of hepatic sinusoid	liver	fibroblast of lung	Lung	0.548928	m3	Maximum	Similarity Distribution
mesenchymal stem cell	muscle	fibroblast of lung	Lung	0.697463	m3	Maximum	Similarity Distribution
brain pericyte	brain	fibroblast of lung	Lung	0.639758	m3	Maximum	Similarity Distribution
endothelial cell of hepatic sinusoid	liver	vein endothelial cell	Lung	0.663425	m3	Maximum	Similarity Distribution
endothelial cell	muscle	vein endothelial cell	Lung	0.679471	m3	Maximum	Similarity Distribution
endothelial cell	brain	vein endothelial cell	Lung	0.743446	m3	Maximum	Similarity Distribution
endothelial cell of hepatic sinusoid	liver	adventitial cell	Lung	0.545494	m3	Maximum	Similarity Distribution
mesenchymal stem cell	muscle	adventitial cell	Lung	0.819916	m3	Maximum	Similarity Distribution
brain pericyte	brain	adventitial cell	Lung	0.652307	m3	Maximum	Similarity Distribution
myeloid leukocyte	liver	myeloid dendritic cell	Lung	0.655516	m3	Maximum	Similarity Distribution
macrophage	muscle	myeloid dendritic cell	Lung	0.704468	m3	Maximum	Similarity Distribution
CD8-positive, alpha-beta T cell	brain	myeloid dendritic cell	Lung	0.574443	m3	Maximum	Similarity Distribution
endothelial cell of hepatic sinusoid	liver	smooth muscle cell of the pulmonary artery	Lung	0.654351	m3	Maximum	Similarity Distribution
endothelial cell	muscle	smooth muscle cell of the pulmonary artery	Lung	0.687975	m3	Maximum	Similarity Distribution
endothelial cell	brain	smooth muscle cell of the pulmonary artery	Lung	0.745741	m3	Maximum	Similarity Distribution
endothelial cell of hepatic sinusoid	liver	pulmonary interstitial fibroblast	Lung	0.523127	m3	Maximum	Similarity Distribution
mesenchymal stem cell	muscle	pulmonary interstitial fibroblast	Lung	0.68733	m3	Maximum	Similarity Distribution
brain pericyte	brain	pulmonary interstitial fibroblast	Lung	0.66763	m3	Maximum	Similarity Distribution
Kupffer cell	liver	dendritic cell	Lung	0.50744	m3	Maximum	Similarity Distribution
macrophage	muscle	dendritic cell	Lung	0.585292	m3	Maximum	Similarity Distribution
endothelial cell	brain	dendritic cell	Lung	0.523404	m3	Maximum	Similarity Distribution
endothelial cell of hepatic sinusoid	liver	endothelial cell of lymphatic vessel	Lung	0.651612	m3	Maximum	Similarity Distribution
endothelial cell	muscle	endothelial cell of lymphatic vessel	Lung	0.641805	m3	Maximum	Similarity Distribution
endothelial cell	brain	endothelial cell of lymphatic vessel	Lung	0.692513	m3	Maximum	Similarity Distribution
myeloid leukocyte	liver	non-classical monocyte	Lung	0.651646	m3	Maximum	Similarity Distribution
macrophage	muscle	non-classical monocyte	Lung	0.689766	m3	Maximum	Similarity Distribution
endothelial cell	brain	non-classical monocyte	Lung	0.580268	m3	Maximum	Similarity Distribution
myeloid leukocyte	liver	classical monocyte	Lung	0.683179	m3	Maximum	Similarity Distribution
macrophage	muscle	classical monocyte	Lung	0.743803	m3	Maximum	Similarity Distribution
endothelial cell	brain	classical monocyte	Lung	0.595821	m3	Maximum	Similarity Distribution
B cell	liver	B cell	Lung	0.712498	m3	Maximum	Similarity Distribution
B cell	muscle	B cell	Lung	0.787022	m3	Maximum	Similarity Distribution
CD8-positive, alpha-beta T cell	brain	B cell	Lung	0.603851	m3	Maximum	Similarity Distribution
mature NK T cell	liver	CD4-positive, alpha-beta T cell	Lung	0.653797	m3	Maximum	Similarity Distribution
T cell	muscle	CD4-positive, alpha-beta T cell	Lung	0.733247	m3	Maximum	Similarity Distribution
CD8-positive, alpha-beta T cell	brain	CD4-positive, alpha-beta T cell	Lung	0.653207	m3	Maximum	Similarity Distribution
mature NK T cell	liver	NK cell	Lung	0.643802	m3	Maximum	Similarity Distribution
T cell	muscle	NK cell	Lung	0.678703	m3	Maximum	Similarity Distribution
CD8-positive, alpha-beta T cell	brain	NK cell	Lung	0.642849	m3	Maximum	Similarity Distribution
hepatocyte	liver	type II pneumocyte	Lung	0.53376	m3	Maximum	Similarity Distribution
skeletal muscle satellite cell	muscle	type II pneumocyte	Lung	0.574795	m3	Maximum	Similarity Distribution
endothelial cell	brain	type II pneumocyte	Lung	0.585233	m3	Maximum	Similarity Distribution
hepatocyte	liver	ciliated columnar cell of tracheobronchial tree	Lung	0.422931	m3	Maximum	Similarity Distribution
skeletal muscle satellite cell	muscle	ciliated columnar cell of tracheobronchial tree	Lung	0.455462	m3	Maximum	Similarity Distribution
ependymal cell	brain	ciliated columnar cell of tracheobronchial tree	Lung	0.573323	m3	Maximum	Similarity Distribution
mature NK T cell	liver	CD8-positive, alpha-beta T cell	Lung	0.600349	m3	Maximum	Similarity Distribution
T cell	muscle	CD8-positive, alpha-beta T cell	Lung	0.642554	m3	Maximum	Similarity Distribution
CD8-positive, alpha-beta T cell	brain	CD8-positive, alpha-beta T cell	Lung	0.611395	m3	Maximum	Similarity Distribution
myeloid leukocyte	liver	neutrophil	Lung	0.496515	m3	Maximum	Similarity Distribution
macrophage	muscle	neutrophil	Lung	0.563439	m3	Maximum	Similarity Distribution
CD8-positive, alpha-beta T cell	brain	neutrophil	Lung	0.454813	m3	Maximum	Similarity Distribution
Kupffer cell	liver	leukocyte	Lung	0.483991	m3	Maximum	Similarity Distribution
macrophage	muscle	leukocyte	Lung	0.531063	m3	Maximum	Similarity Distribution
endothelial cell	brain	leukocyte	Lung	0.462543	m3	Maximum	Similarity Distribution
hepatocyte	liver	club cell of bronchiole	Lung	0.388845	m3	Maximum	Similarity Distribution
skeletal muscle satellite cell	muscle	club cell of bronchiole	Lung	0.41827	m3	Maximum	Similarity Distribution
endothelial cell	brain	club cell of bronchiole	Lung	0.419749	m3	Maximum	Similarity Distribution
endothelial cell of hepatic sinusoid	liver	pericyte cell	Lung	0.541604	m3	Maximum	Similarity Distribution
mesenchymal stem cell	muscle	pericyte cell	Lung	0.561173	m3	Maximum	Similarity Distribution
brain pericyte	brain	pericyte cell	Lung	0.625597	m3	Maximum	Similarity Distribution
mature NK T cell	liver	regulatory T cell	Lung	0.288569	m3	Maximum	Similarity Distribution
T cell	muscle	regulatory T cell	Lung	0.311328	m3	Maximum	Similarity Distribution
CD8-positive, alpha-beta T cell	brain	regulatory T cell	Lung	0.304612	m3	Maximum	Similarity Distribution
CD4-positive, alpha-beta T cell	liver	T cell	Lung	0.288371	m3	Maximum	Similarity Distribution
T cell	muscle	T cell	Lung	0.283054	m3	Maximum	Similarity Distribution
mature NK T cell	brain	T cell	Lung	0.291373	m3	Maximum	Similarity Distribution
CD4-positive, alpha-beta T cell	lung	mature NK T cell	Liver	0.653797	m3	Maximum	Similarity Distribution
T cell	muscle	mature NK T cell	Liver	0.649832	m3	Maximum	Similarity Distribution
CD8-positive, alpha-beta T cell	brain	mature NK T cell	Liver	0.600158	m3	Maximum	Similarity Distribution
type II pneumocyte	lung	hepatocyte	Liver	0.53376	m3	Maximum	Similarity Distribution
skeletal muscle satellite cell	muscle	hepatocyte	Liver	0.492029	m3	Maximum	Similarity Distribution
oligodendrocyte	brain	hepatocyte	Liver	0.504803	m3	Maximum	Similarity Distribution
bronchial smooth muscle cell	lung	endothelial cell of hepatic sinusoid	Liver	0.75287	m3	Maximum	Similarity Distribution
endothelial cell	muscle	endothelial cell of hepatic sinusoid	Liver	0.672048	m3	Maximum	Similarity Distribution
endothelial cell	brain	endothelial cell of hepatic sinusoid	Liver	0.695759	m3	Maximum	Similarity Distribution
classical monocyte	lung	Kupffer cell	Liver	0.647328	m3	Maximum	Similarity Distribution
macrophage	muscle	Kupffer cell	Liver	0.607869	m3	Maximum	Similarity Distribution
endothelial cell	brain	Kupffer cell	Liver	0.513984	m3	Maximum	Similarity Distribution
classical monocyte	lung	myeloid leukocyte	Liver	0.683179	m3	Maximum	Similarity Distribution
macrophage	muscle	myeloid leukocyte	Liver	0.611197	m3	Maximum	Similarity Distribution
CD8-positive, alpha-beta T cell	brain	myeloid leukocyte	Liver	0.493336	m3	Maximum	Similarity Distribution
B cell	lung	B cell	Liver	0.712498	m3	Maximum	Similarity Distribution
B cell	muscle	B cell	Liver	0.725785	m3	Maximum	Similarity Distribution
CD8-positive, alpha-beta T cell	brain	B cell	Liver	0.526903	m3	Maximum	Similarity Distribution
neutrophil	lung	neutrophil	Liver	0.464539	m3	Maximum	Similarity Distribution
macrophage	muscle	neutrophil	Liver	0.385173	m3	Maximum	Similarity Distribution
T cell	brain	neutrophil	Liver	0.291766	m3	Maximum	Similarity Distribution
CD4-positive, alpha-beta T cell	lung	T cell	Liver	0.509479	m3	Maximum	Similarity Distribution
T cell	muscle	T cell	Liver	0.488566	m3	Maximum	Similarity Distribution
CD8-positive, alpha-beta T cell	brain	T cell	Liver	0.488935	m3	Maximum	Similarity Distribution
NK cell	lung	NK cell	Liver	0.594027	m3	Maximum	Similarity Distribution
T cell	muscle	NK cell	Liver	0.544981	m3	Maximum	Similarity Distribution
CD8-positive, alpha-beta T cell	brain	NK cell	Liver	0.520425	m3	Maximum	Similarity Distribution
CD4-positive, alpha-beta T cell	lung	CD4-positive, alpha-beta T cell	Liver	0.415944	m3	Maximum	Similarity Distribution
T cell	muscle	CD4-positive, alpha-beta T cell	Liver	0.395378	m3	Maximum	Similarity Distribution
CD8-positive, alpha-beta T cell	brain	CD4-positive, alpha-beta T cell	Liver	0.377879	m3	Maximum	Similarity Distribution
adventitial cell	lung	skeletal muscle satellite cell	Muscle	0.659502	m3	Maximum	Similarity Distribution
endothelial cell of hepatic sinusoid	liver	skeletal muscle satellite cell	Muscle	0.558403	m3	Maximum	Similarity Distribution
brain pericyte	brain	skeletal muscle satellite cell	Muscle	0.634444	m3	Maximum	Similarity Distribution
classical monocyte	lung	macrophage	Muscle	0.743803	m3	Maximum	Similarity Distribution
myeloid leukocyte	liver	macrophage	Muscle	0.611197	m3	Maximum	Similarity Distribution
endothelial cell	brain	macrophage	Muscle	0.526921	m3	Maximum	Similarity Distribution
adventitial cell	lung	mesenchymal stem cell	Muscle	0.819916	m3	Maximum	Similarity Distribution
endothelial cell of hepatic sinusoid	liver	mesenchymal stem cell	Muscle	0.564254	m3	Maximum	Similarity Distribution
brain pericyte	brain	mesenchymal stem cell	Muscle	0.648201	m3	Maximum	Similarity Distribution
bronchial smooth muscle cell	lung	endothelial cell	Muscle	0.745931	m3	Maximum	Similarity Distribution
endothelial cell of hepatic sinusoid	liver	endothelial cell	Muscle	0.672048	m3	Maximum	Similarity Distribution
endothelial cell	brain	endothelial cell	Muscle	0.75666	m3	Maximum	Similarity Distribution
B cell	lung	B cell	Muscle	0.787022	m3	Maximum	Similarity Distribution
B cell	liver	B cell	Muscle	0.725785	m3	Maximum	Similarity Distribution
CD8-positive, alpha-beta T cell	brain	B cell	Muscle	0.606455	m3	Maximum	Similarity Distribution
CD4-positive, alpha-beta T cell	lung	T cell	Muscle	0.733247	m3	Maximum	Similarity Distribution
mature NK T cell	liver	T cell	Muscle	0.649832	m3	Maximum	Similarity Distribution
CD8-positive, alpha-beta T cell	brain	T cell	Muscle	0.655072	m3	Maximum	Similarity Distribution
ciliated columnar cell of tracheobronchial tree	lung	ependymal cell	Brain	0.573323	m3	Maximum	Similarity Distribution
hepatocyte	liver	ependymal cell	Brain	0.369736	m3	Maximum	Similarity Distribution
skeletal muscle satellite cell	muscle	ependymal cell	Brain	0.443517	m3	Maximum	Similarity Distribution
adventitial cell	lung	astrocyte	Brain	0.590093	m3	Maximum	Similarity Distribution
hepatocyte	liver	astrocyte	Brain	0.499235	m3	Maximum	Similarity Distribution
skeletal muscle satellite cell	muscle	astrocyte	Brain	0.57384	m3	Maximum	Similarity Distribution
bronchial smooth muscle cell	lung	oligodendrocyte	Brain	0.587848	m3	Maximum	Similarity Distribution
hepatocyte	liver	oligodendrocyte	Brain	0.504803	m3	Maximum	Similarity Distribution
skeletal muscle satellite cell	muscle	oligodendrocyte	Brain	0.606212	m3	Maximum	Similarity Distribution
bronchial smooth muscle cell	lung	endothelial cell	Brain	0.819295	m3	Maximum	Similarity Distribution
endothelial cell of hepatic sinusoid	liver	endothelial cell	Brain	0.695759	m3	Maximum	Similarity Distribution
endothelial cell	muscle	endothelial cell	Brain	0.75666	m3	Maximum	Similarity Distribution
adventitial cell	lung	neuron	Brain	0.430545	m3	Maximum	Similarity Distribution
endothelial cell of hepatic sinusoid	liver	neuron	Brain	0.360099	m3	Maximum	Similarity Distribution
skeletal muscle satellite cell	muscle	neuron	Brain	0.463836	m3	Maximum	Similarity Distribution
type II pneumocyte	lung	medium spiny neuron	Brain	0.399727	m3	Maximum	Similarity Distribution
endothelial cell of hepatic sinusoid	liver	medium spiny neuron	Brain	0.337345	m3	Maximum	Similarity Distribution
skeletal muscle satellite cell	muscle	medium spiny neuron	Brain	0.434294	m3	Maximum	Similarity Distribution
adventitial cell	lung	interneuron	Brain	0.458185	m3	Maximum	Similarity Distribution
endothelial cell of hepatic sinusoid	liver	interneuron	Brain	0.390257	m3	Maximum	Similarity Distribution
skeletal muscle satellite cell	muscle	interneuron	Brain	0.451662	m3	Maximum	Similarity Distribution
adventitial cell	lung	oligodendrocyte precursor cell	Brain	0.542878	m3	Maximum	Similarity Distribution
endothelial cell of hepatic sinusoid	liver	oligodendrocyte precursor cell	Brain	0.431483	m3	Maximum	Similarity Distribution
skeletal muscle satellite cell	muscle	oligodendrocyte precursor cell	Brain	0.538786	m3	Maximum	Similarity Distribution
bronchial smooth muscle cell	lung	neuronal stem cell	Brain	0.547677	m3	Maximum	Similarity Distribution
endothelial cell of hepatic sinusoid	liver	neuronal stem cell	Brain	0.454251	m3	Maximum	Similarity Distribution
skeletal muscle satellite cell	muscle	neuronal stem cell	Brain	0.599406	m3	Maximum	Similarity Distribution
adventitial cell	lung	Bergmann glial cell	Brain	0.551237	m3	Maximum	Similarity Distribution
hepatocyte	liver	Bergmann glial cell	Brain	0.452323	m3	Maximum	Similarity Distribution
skeletal muscle satellite cell	muscle	Bergmann glial cell	Brain	0.538665	m3	Maximum	Similarity Distribution
bronchial smooth muscle cell	lung	brain pericyte	Brain	0.685107	m3	Maximum	Similarity Distribution
endothelial cell of hepatic sinusoid	liver	brain pericyte	Brain	0.575805	m3	Maximum	Similarity Distribution
mesenchymal stem cell	muscle	brain pericyte	Brain	0.648201	m3	Maximum	Similarity Distribution
CD4-positive, alpha-beta T cell	lung	CD8-positive, alpha-beta T cell	Brain	0.653207	m3	Maximum	Similarity Distribution
mature NK T cell	liver	CD8-positive, alpha-beta T cell	Brain	0.600158	m3	Maximum	Similarity Distribution
T cell	muscle	CD8-positive, alpha-beta T cell	Brain	0.655072	m3	Maximum	Similarity Distribution
NK cell	lung	mature NK T cell	Brain	0.602411	m3	Maximum	Similarity Distribution
mature NK T cell	liver	mature NK T cell	Brain	0.54831	m3	Maximum	Similarity Distribution
T cell	muscle	mature NK T cell	Brain	0.573556	m3	Maximum	Similarity Distribution
ciliated columnar cell of tracheobronchial tree	lung	neuroepithelial cell	Brain	0.308224	m3	Maximum	Similarity Distribution
endothelial cell of hepatic sinusoid	liver	neuroepithelial cell	Brain	0.25	m3	Maximum	Similarity Distribution
skeletal muscle satellite cell	muscle	neuroepithelial cell	Brain	0.316142	m3	Maximum	Similarity Distribution
classical monocyte	lung	T cell	Brain	0.549188	m3	Maximum	Similarity Distribution
B cell	liver	T cell	Brain	0.49118	m3	Maximum	Similarity Distribution
B cell	muscle	T cell	Brain	0.540664	m3	Maximum	Similarity Distribution
endothelial cell of hepatic sinusoid	liver	bronchial smooth muscle cell	Lung	0.694235	m24	Maximum	Similarity Distribution
endothelial cell	muscle	bronchial smooth muscle cell	Lung	0.70713	m24	Maximum	Similarity Distribution
endothelial cell	brain	bronchial smooth muscle cell	Lung	0.802293	m24	Maximum	Similarity Distribution
endothelial cell of hepatic sinusoid	liver	fibroblast of lung	Lung	0.577479	m24	Maximum	Similarity Distribution
mesenchymal stem cell	muscle	fibroblast of lung	Lung	0.731312	m24	Maximum	Similarity Distribution
brain pericyte	brain	fibroblast of lung	Lung	0.597489	m24	Maximum	Similarity Distribution
endothelial cell of hepatic sinusoid	liver	vein endothelial cell	Lung	0.636037	m24	Maximum	Similarity Distribution
endothelial cell	muscle	vein endothelial cell	Lung	0.653157	m24	Maximum	Similarity Distribution
endothelial cell	brain	vein endothelial cell	Lung	0.737873	m24	Maximum	Similarity Distribution
endothelial cell of hepatic sinusoid	liver	adventitial cell	Lung	0.552611	m24	Maximum	Similarity Distribution
mesenchymal stem cell	muscle	adventitial cell	Lung	0.753948	m24	Maximum	Similarity Distribution
brain pericyte	brain	adventitial cell	Lung	0.560115	m24	Maximum	Similarity Distribution
myeloid leukocyte	liver	myeloid dendritic cell	Lung	0.794931	m24	Maximum	Similarity Distribution
macrophage	muscle	myeloid dendritic cell	Lung	0.688733	m24	Maximum	Similarity Distribution
CD8-positive, alpha-beta T cell	brain	myeloid dendritic cell	Lung	0.600343	m24	Maximum	Similarity Distribution
endothelial cell of hepatic sinusoid	liver	smooth muscle cell of the pulmonary artery	Lung	0.518564	m24	Maximum	Similarity Distribution
endothelial cell	muscle	smooth muscle cell of the pulmonary artery	Lung	0.536015	m24	Maximum	Similarity Distribution
endothelial cell	brain	smooth muscle cell of the pulmonary artery	Lung	0.583672	m24	Maximum	Similarity Distribution
endothelial cell of hepatic sinusoid	liver	pulmonary interstitial fibroblast	Lung	0.389159	m24	Maximum	Similarity Distribution
mesenchymal stem cell	muscle	pulmonary interstitial fibroblast	Lung	0.479012	m24	Maximum	Similarity Distribution
brain pericyte	brain	pulmonary interstitial fibroblast	Lung	0.4115	m24	Maximum	Similarity Distribution
Kupffer cell	liver	dendritic cell	Lung	0.543052	m24	Maximum	Similarity Distribution
macrophage	muscle	dendritic cell	Lung	0.595914	m24	Maximum	Similarity Distribution
endothelial cell	brain	dendritic cell	Lung	0.569387	m24	Maximum	Similarity Distribution
endothelial cell of hepatic sinusoid	liver	endothelial cell of lymphatic vessel	Lung	0.610642	m24	Maximum	Similarity Distribution
endothelial cell	muscle	endothelial cell of lymphatic vessel	Lung	0.583563	m24	Maximum	Similarity Distribution
endothelial cell	brain	endothelial cell of lymphatic vessel	Lung	0.662746	m24	Maximum	Similarity Distribution
myeloid leukocyte	liver	non-classical monocyte	Lung	0.728095	m24	Maximum	Similarity Distribution
macrophage	muscle	non-classical monocyte	Lung	0.629879	m24	Maximum	Similarity Distribution
endothelial cell	brain	non-classical monocyte	Lung	0.554716	m24	Maximum	Similarity Distribution
myeloid leukocyte	liver	classical monocyte	Lung	0.791599	m24	Maximum	Similarity Distribution
macrophage	muscle	classical monocyte	Lung	0.68043	m24	Maximum	Similarity Distribution
endothelial cell	brain	classical monocyte	Lung	0.589528	m24	Maximum	Similarity Distribution
B cell	liver	B cell	Lung	0.742729	m24	Maximum	Similarity Distribution
B cell	muscle	B cell	Lung	0.692295	m24	Maximum	Similarity Distribution
CD8-positive, alpha-beta T cell	brain	B cell	Lung	0.639125	m24	Maximum	Similarity Distribution
mature NK T cell	liver	CD4-positive, alpha-beta T cell	Lung	0.33367	m24	Maximum	Similarity Distribution
T cell	muscle	CD4-positive, alpha-beta T cell	Lung	0.350238	m24	Maximum	Similarity Distribution
CD8-positive, alpha-beta T cell	brain	CD4-positive, alpha-beta T cell	Lung	0.341752	m24	Maximum	Similarity Distribution
mature NK T cell	liver	NK cell	Lung	0.54176	m24	Maximum	Similarity Distribution
T cell	muscle	NK cell	Lung	0.541946	m24	Maximum	Similarity Distribution
CD8-positive, alpha-beta T cell	brain	NK cell	Lung	0.532427	m24	Maximum	Similarity Distribution
hepatocyte	liver	type II pneumocyte	Lung	0.489887	m24	Maximum	Similarity Distribution
skeletal muscle satellite cell	muscle	type II pneumocyte	Lung	0.566192	m24	Maximum	Similarity Distribution
endothelial cell	brain	type II pneumocyte	Lung	0.579135	m24	Maximum	Similarity Distribution
hepatocyte	liver	ciliated columnar cell of tracheobronchial tree	Lung	0.400793	m24	Maximum	Similarity Distribution
skeletal muscle satellite cell	muscle	ciliated columnar cell of tracheobronchial tree	Lung	0.458371	m24	Maximum	Similarity Distribution
ependymal cell	brain	ciliated columnar cell of tracheobronchial tree	Lung	0.45641	m24	Maximum	Similarity Distribution
mature NK T cell	liver	CD8-positive, alpha-beta T cell	Lung	0.735956	m24	Maximum	Similarity Distribution
T cell	muscle	CD8-positive, alpha-beta T cell	Lung	0.731681	m24	Maximum	Similarity Distribution
CD8-positive, alpha-beta T cell	brain	CD8-positive, alpha-beta T cell	Lung	0.70589	m24	Maximum	Similarity Distribution
myeloid leukocyte	liver	neutrophil	Lung	0.580309	m24	Maximum	Similarity Distribution
macrophage	muscle	neutrophil	Lung	0.569385	m24	Maximum	Similarity Distribution
CD8-positive, alpha-beta T cell	brain	neutrophil	Lung	0.456817	m24	Maximum	Similarity Distribution
Kupffer cell	liver	leukocyte	Lung	0.4969	m24	Maximum	Similarity Distribution
macrophage	muscle	leukocyte	Lung	0.574443	m24	Maximum	Similarity Distribution
endothelial cell	brain	leukocyte	Lung	0.502369	m24	Maximum	Similarity Distribution
hepatocyte	liver	club cell of bronchiole	Lung	0.382643	m24	Maximum	Similarity Distribution
skeletal muscle satellite cell	muscle	club cell of bronchiole	Lung	0.456128	m24	Maximum	Similarity Distribution
endothelial cell	brain	club cell of bronchiole	Lung	0.425837	m24	Maximum	Similarity Distribution
endothelial cell of hepatic sinusoid	liver	pericyte cell	Lung	0.452083	m24	Maximum	Similarity Distribution
mesenchymal stem cell	muscle	pericyte cell	Lung	0.512628	m24	Maximum	Similarity Distribution
brain pericyte	brain	pericyte cell	Lung	0.502623	m24	Maximum	Similarity Distribution
mature NK T cell	liver	regulatory T cell	Lung	0.6522	m24	Maximum	Similarity Distribution
T cell	muscle	regulatory T cell	Lung	0.638384	m24	Maximum	Similarity Distribution
CD8-positive, alpha-beta T cell	brain	regulatory T cell	Lung	0.609968	m24	Maximum	Similarity Distribution
CD4-positive, alpha-beta T cell	liver	T cell	Lung	0.604023	m24	Maximum	Similarity Distribution
T cell	muscle	T cell	Lung	0.644782	m24	Maximum	Similarity Distribution
mature NK T cell	brain	T cell	Lung	0.504929	m24	Maximum	Similarity Distribution
CD4-positive, alpha-beta T cell	lung	mature NK T cell	Liver	0.33367	m24	Maximum	Similarity Distribution
T cell	muscle	mature NK T cell	Liver	0.682242	m24	Maximum	Similarity Distribution
CD8-positive, alpha-beta T cell	brain	mature NK T cell	Liver	0.673198	m24	Maximum	Similarity Distribution
type II pneumocyte	lung	hepatocyte	Liver	0.489887	m24	Maximum	Similarity Distribution
skeletal muscle satellite cell	muscle	hepatocyte	Liver	0.468627	m24	Maximum	Similarity Distribution
oligodendrocyte	brain	hepatocyte	Liver	0.455614	m24	Maximum	Similarity Distribution
bronchial smooth muscle cell	lung	endothelial cell of hepatic sinusoid	Liver	0.694235	m24	Maximum	Similarity Distribution
endothelial cell	muscle	endothelial cell of hepatic sinusoid	Liver	0.606691	m24	Maximum	Similarity Distribution
endothelial cell	brain	endothelial cell of hepatic sinusoid	Liver	0.647906	m24	Maximum	Similarity Distribution
classical monocyte	lung	Kupffer cell	Liver	0.675091	m24	Maximum	Similarity Distribution
macrophage	muscle	Kupffer cell	Liver	0.581426	m24	Maximum	Similarity Distribution
endothelial cell	brain	Kupffer cell	Liver	0.489782	m24	Maximum	Similarity Distribution
classical monocyte	lung	myeloid leukocyte	Liver	0.791599	m24	Maximum	Similarity Distribution
macrophage	muscle	myeloid leukocyte	Liver	0.67964	m24	Maximum	Similarity Distribution
CD8-positive, alpha-beta T cell	brain	myeloid leukocyte	Liver	0.559505	m24	Maximum	Similarity Distribution
B cell	lung	B cell	Liver	0.742729	m24	Maximum	Similarity Distribution
B cell	muscle	B cell	Liver	0.627307	m24	Maximum	Similarity Distribution
CD8-positive, alpha-beta T cell	brain	B cell	Liver	0.567597	m24	Maximum	Similarity Distribution
neutrophil	lung	neutrophil	Liver	0.516992	m24	Maximum	Similarity Distribution
macrophage	muscle	neutrophil	Liver	0.425633	m24	Maximum	Similarity Distribution
T cell	brain	neutrophil	Liver	0.313833	m24	Maximum	Similarity Distribution
CD4-positive, alpha-beta T cell	lung	T cell	Liver	0.345919	m24	Maximum	Similarity Distribution
T cell	muscle	T cell	Liver	0.666175	m24	Maximum	Similarity Distribution
CD8-positive, alpha-beta T cell	brain	T cell	Liver	0.644642	m24	Maximum	Similarity Distribution
NK cell	lung	NK cell	Liver	0.524867	m24	Maximum	Similarity Distribution
T cell	muscle	NK cell	Liver	0.605775	m24	Maximum	Similarity Distribution
CD8-positive, alpha-beta T cell	brain	NK cell	Liver	0.597907	m24	Maximum	Similarity Distribution
CD4-positive, alpha-beta T cell	lung	CD4-positive, alpha-beta T cell	Liver	0.328166	m24	Maximum	Similarity Distribution
T cell	muscle	CD4-positive, alpha-beta T cell	Liver	0.63157	m24	Maximum	Similarity Distribution
CD8-positive, alpha-beta T cell	brain	CD4-positive, alpha-beta T cell	Liver	0.602376	m24	Maximum	Similarity Distribution
adventitial cell	lung	skeletal muscle satellite cell	Muscle	0.624524	m24	Maximum	Similarity Distribution
endothelial cell of hepatic sinusoid	liver	skeletal muscle satellite cell	Muscle	0.533004	m24	Maximum	Similarity Distribution
brain pericyte	brain	skeletal muscle satellite cell	Muscle	0.573864	m24	Maximum	Similarity Distribution
classical monocyte	lung	macrophage	Muscle	0.68043	m24	Maximum	Similarity Distribution
myeloid leukocyte	liver	macrophage	Muscle	0.67964	m24	Maximum	Similarity Distribution
endothelial cell	brain	macrophage	Muscle	0.518409	m24	Maximum	Similarity Distribution
adventitial cell	lung	mesenchymal stem cell	Muscle	0.753948	m24	Maximum	Similarity Distribution
endothelial cell of hepatic sinusoid	liver	mesenchymal stem cell	Muscle	0.576568	m24	Maximum	Similarity Distribution
brain pericyte	brain	mesenchymal stem cell	Muscle	0.587371	m24	Maximum	Similarity Distribution
bronchial smooth muscle cell	lung	endothelial cell	Muscle	0.70713	m24	Maximum	Similarity Distribution
endothelial cell of hepatic sinusoid	liver	endothelial cell	Muscle	0.606691	m24	Maximum	Similarity Distribution
endothelial cell	brain	endothelial cell	Muscle	0.704025	m24	Maximum	Similarity Distribution
B cell	lung	B cell	Muscle	0.692295	m24	Maximum	Similarity Distribution
B cell	liver	B cell	Muscle	0.627307	m24	Maximum	Similarity Distribution
CD8-positive, alpha-beta T cell	brain	B cell	Muscle	0.585419	m24	Maximum	Similarity Distribution
CD4-positive, alpha-beta T cell	lung	T cell	Muscle	0.350238	m24	Maximum	Similarity Distribution
mature NK T cell	liver	T cell	Muscle	0.682242	m24	Maximum	Similarity Distribution
CD8-positive, alpha-beta T cell	brain	T cell	Muscle	0.677776	m24	Maximum	Similarity Distribution
ciliated columnar cell of tracheobronchial tree	lung	ependymal cell	Brain	0.45641	m24	Maximum	Similarity Distribution
hepatocyte	liver	ependymal cell	Brain	0.290943	m24	Maximum	Similarity Distribution
skeletal muscle satellite cell	muscle	ependymal cell	Brain	0.387376	m24	Maximum	Similarity Distribution
adventitial cell	lung	astrocyte	Brain	0.472359	m24	Maximum	Similarity Distribution
hepatocyte	liver	astrocyte	Brain	0.390942	m24	Maximum	Similarity Distribution
skeletal muscle satellite cell	muscle	astrocyte	Brain	0.489469	m24	Maximum	Similarity Distribution
bronchial smooth muscle cell	lung	oligodendrocyte	Brain	0.600949	m24	Maximum	Similarity Distribution
hepatocyte	liver	oligodendrocyte	Brain	0.455614	m24	Maximum	Similarity Distribution
skeletal muscle satellite cell	muscle	oligodendrocyte	Brain	0.593584	m24	Maximum	Similarity Distribution
bronchial smooth muscle cell	lung	endothelial cell	Brain	0.802293	m24	Maximum	Similarity Distribution
endothelial cell of hepatic sinusoid	liver	endothelial cell	Brain	0.647906	m24	Maximum	Similarity Distribution
endothelial cell	muscle	endothelial cell	Brain	0.704025	m24	Maximum	Similarity Distribution
adventitial cell	lung	neuron	Brain	0.346497	m24	Maximum	Similarity Distribution
endothelial cell of hepatic sinusoid	liver	neuron	Brain	0.322576	m24	Maximum	Similarity Distribution
skeletal muscle satellite cell	muscle	neuron	Brain	0.414256	m24	Maximum	Similarity Distribution
type II pneumocyte	lung	medium spiny neuron	Brain	0.291854	m24	Maximum	Similarity Distribution
endothelial cell of hepatic sinusoid	liver	medium spiny neuron	Brain	0.285929	m24	Maximum	Similarity Distribution
skeletal muscle satellite cell	muscle	medium spiny neuron	Brain	0.358163	m24	Maximum	Similarity Distribution
adventitial cell	lung	interneuron	Brain	0.3916	m24	Maximum	Similarity Distribution
endothelial cell of hepatic sinusoid	liver	interneuron	Brain	0.368447	m24	Maximum	Similarity Distribution
skeletal muscle satellite cell	muscle	interneuron	Brain	0.444003	m24	Maximum	Similarity Distribution
adventitial cell	lung	oligodendrocyte precursor cell	Brain	0.458242	m24	Maximum	Similarity Distribution
endothelial cell of hepatic sinusoid	liver	oligodendrocyte precursor cell	Brain	0.379664	m24	Maximum	Similarity Distribution
skeletal muscle satellite cell	muscle	oligodendrocyte precursor cell	Brain	0.475072	m24	Maximum	Similarity Distribution
bronchial smooth muscle cell	lung	neuronal stem cell	Brain	0.234802	m24	Maximum	Similarity Distribution
endothelial cell of hepatic sinusoid	liver	neuronal stem cell	Brain	0.196678	m24	Maximum	Similarity Distribution
skeletal muscle satellite cell	muscle	neuronal stem cell	Brain	0.239133	m24	Maximum	Similarity Distribution
adventitial cell	lung	Bergmann glial cell	Brain	0.393489	m24	Maximum	Similarity Distribution
hepatocyte	liver	Bergmann glial cell	Brain	0.316	m24	Maximum	Similarity Distribution
skeletal muscle satellite cell	muscle	Bergmann glial cell	Brain	0.395203	m24	Maximum	Similarity Distribution
bronchial smooth muscle cell	lung	brain pericyte	Brain	0.623522	m24	Maximum	Similarity Distribution
endothelial cell of hepatic sinusoid	liver	brain pericyte	Brain	0.54132	m24	Maximum	Similarity Distribution
mesenchymal stem cell	muscle	brain pericyte	Brain	0.587371	m24	Maximum	Similarity Distribution
CD4-positive, alpha-beta T cell	lung	CD8-positive, alpha-beta T cell	Brain	0.341752	m24	Maximum	Similarity Distribution
mature NK T cell	liver	CD8-positive, alpha-beta T cell	Brain	0.673198	m24	Maximum	Similarity Distribution
T cell	muscle	CD8-positive, alpha-beta T cell	Brain	0.677776	m24	Maximum	Similarity Distribution
NK cell	lung	mature NK T cell	Brain	0.496701	m24	Maximum	Similarity Distribution
mature NK T cell	liver	mature NK T cell	Brain	0.521272	m24	Maximum	Similarity Distribution
T cell	muscle	mature NK T cell	Brain	0.522919	m24	Maximum	Similarity Distribution
ciliated columnar cell of tracheobronchial tree	lung	neuroepithelial cell	Brain	0.327423	m24	Maximum	Similarity Distribution
endothelial cell of hepatic sinusoid	liver	neuroepithelial cell	Brain	0.24555	m24	Maximum	Similarity Distribution
skeletal muscle satellite cell	muscle	neuroepithelial cell	Brain	0.296555	m24	Maximum	Similarity Distribution
classical monocyte	lung	T cell	Brain	0.559511	m24	Maximum	Similarity Distribution
B cell	liver	T cell	Brain	0.530014	m24	Maximum	Similarity Distribution
B cell	muscle	T cell	Brain	0.556045	m24	Maximum	Similarity Distribution
neutrophil	liver	bronchial smooth muscle cell	Lung	0.245433	m3	Minimum	Similarity Distribution
macrophage	muscle	bronchial smooth muscle cell	Lung	0.509301	m3	Minimum	Similarity Distribution
neuroepithelial cell	brain	bronchial smooth muscle cell	Lung	0.277083	m3	Minimum	Similarity Distribution
neutrophil	liver	fibroblast of lung	Lung	0.191798	m3	Minimum	Similarity Distribution
macrophage	muscle	fibroblast of lung	Lung	0.395208	m3	Minimum	Similarity Distribution
neuroepithelial cell	brain	fibroblast of lung	Lung	0.271021	m3	Minimum	Similarity Distribution
neutrophil	liver	vein endothelial cell	Lung	0.234805	m3	Minimum	Similarity Distribution
macrophage	muscle	vein endothelial cell	Lung	0.47444	m3	Minimum	Similarity Distribution
neuroepithelial cell	brain	vein endothelial cell	Lung	0.2682	m3	Minimum	Similarity Distribution
neutrophil	liver	adventitial cell	Lung	0.187864	m3	Minimum	Similarity Distribution
T cell	muscle	adventitial cell	Lung	0.369475	m3	Minimum	Similarity Distribution
neuroepithelial cell	brain	adventitial cell	Lung	0.283136	m3	Minimum	Similarity Distribution
neutrophil	liver	myeloid dendritic cell	Lung	0.333262	m3	Minimum	Similarity Distribution
mesenchymal stem cell	muscle	myeloid dendritic cell	Lung	0.437618	m3	Minimum	Similarity Distribution
neuroepithelial cell	brain	myeloid dendritic cell	Lung	0.23748	m3	Minimum	Similarity Distribution
neutrophil	liver	smooth muscle cell of the pulmonary artery	Lung	0.228286	m3	Minimum	Similarity Distribution
macrophage	muscle	smooth muscle cell of the pulmonary artery	Lung	0.475355	m3	Minimum	Similarity Distribution
neuroepithelial cell	brain	smooth muscle cell of the pulmonary artery	Lung	0.27708	m3	Minimum	Similarity Distribution
neutrophil	liver	pulmonary interstitial fibroblast	Lung	0.192431	m3	Minimum	Similarity Distribution
T cell	muscle	pulmonary interstitial fibroblast	Lung	0.384705	m3	Minimum	Similarity Distribution
neuroepithelial cell	brain	pulmonary interstitial fibroblast	Lung	0.285241	m3	Minimum	Similarity Distribution
CD4-positive, alpha-beta T cell	liver	dendritic cell	Lung	0.29485	m3	Minimum	Similarity Distribution
endothelial cell	muscle	dendritic cell	Lung	0.448828	m3	Minimum	Similarity Distribution
neuroepithelial cell	brain	dendritic cell	Lung	0.252227	m3	Minimum	Similarity Distribution
neutrophil	liver	endothelial cell of lymphatic vessel	Lung	0.225982	m3	Minimum	Similarity Distribution
macrophage	muscle	endothelial cell of lymphatic vessel	Lung	0.46711	m3	Minimum	Similarity Distribution
neuroepithelial cell	brain	endothelial cell of lymphatic vessel	Lung	0.26421	m3	Minimum	Similarity Distribution
CD4-positive, alpha-beta T cell	liver	non-classical monocyte	Lung	0.339773	m3	Minimum	Similarity Distribution
mesenchymal stem cell	muscle	non-classical monocyte	Lung	0.451913	m3	Minimum	Similarity Distribution
neuroepithelial cell	brain	non-classical monocyte	Lung	0.237208	m3	Minimum	Similarity Distribution
CD4-positive, alpha-beta T cell	liver	classical monocyte	Lung	0.348935	m3	Minimum	Similarity Distribution
mesenchymal stem cell	muscle	classical monocyte	Lung	0.478398	m3	Minimum	Similarity Distribution
neuroepithelial cell	brain	classical monocyte	Lung	0.250598	m3	Minimum	Similarity Distribution
neutrophil	liver	B cell	Lung	0.287727	m3	Minimum	Similarity Distribution
mesenchymal stem cell	muscle	B cell	Lung	0.419741	m3	Minimum	Similarity Distribution
neuroepithelial cell	brain	B cell	Lung	0.232116	m3	Minimum	Similarity Distribution
neutrophil	liver	CD4-positive, alpha-beta T cell	Lung	0.269826	m3	Minimum	Similarity Distribution
mesenchymal stem cell	muscle	CD4-positive, alpha-beta T cell	Lung	0.426701	m3	Minimum	Similarity Distribution
neuroepithelial cell	brain	CD4-positive, alpha-beta T cell	Lung	0.239951	m3	Minimum	Similarity Distribution
neutrophil	liver	NK cell	Lung	0.292332	m3	Minimum	Similarity Distribution
mesenchymal stem cell	muscle	NK cell	Lung	0.427092	m3	Minimum	Similarity Distribution
neuroepithelial cell	brain	NK cell	Lung	0.232571	m3	Minimum	Similarity Distribution
neutrophil	liver	type II pneumocyte	Lung	0.197026	m3	Minimum	Similarity Distribution
macrophage	muscle	type II pneumocyte	Lung	0.43239	m3	Minimum	Similarity Distribution
neuroepithelial cell	brain	type II pneumocyte	Lung	0.28611	m3	Minimum	Similarity Distribution
neutrophil	liver	ciliated columnar cell of tracheobronchial tree	Lung	0.13863	m3	Minimum	Similarity Distribution
macrophage	muscle	ciliated columnar cell of tracheobronchial tree	Lung	0.327619	m3	Minimum	Similarity Distribution
T cell	brain	ciliated columnar cell of tracheobronchial tree	Lung	0.265657	m3	Minimum	Similarity Distribution
neutrophil	liver	CD8-positive, alpha-beta T cell	Lung	0.281161	m3	Minimum	Similarity Distribution
mesenchymal stem cell	muscle	CD8-positive, alpha-beta T cell	Lung	0.381411	m3	Minimum	Similarity Distribution
neuroepithelial cell	brain	CD8-positive, alpha-beta T cell	Lung	0.237348	m3	Minimum	Similarity Distribution
hepatocyte	liver	neutrophil	Lung	0.251992	m3	Minimum	Similarity Distribution
mesenchymal stem cell	muscle	neutrophil	Lung	0.359823	m3	Minimum	Similarity Distribution
medium spiny neuron	brain	neutrophil	Lung	0.225208	m3	Minimum	Similarity Distribution
CD4-positive, alpha-beta T cell	liver	leukocyte	Lung	0.295905	m3	Minimum	Similarity Distribution
endothelial cell	muscle	leukocyte	Lung	0.375773	m3	Minimum	Similarity Distribution
medium spiny neuron	brain	leukocyte	Lung	0.25022	m3	Minimum	Similarity Distribution
neutrophil	liver	club cell of bronchiole	Lung	0.210469	m3	Minimum	Similarity Distribution
T cell	muscle	club cell of bronchiole	Lung	0.347969	m3	Minimum	Similarity Distribution
medium spiny neuron	brain	club cell of bronchiole	Lung	0.279253	m3	Minimum	Similarity Distribution
neutrophil	liver	pericyte cell	Lung	0.199581	m3	Minimum	Similarity Distribution
macrophage	muscle	pericyte cell	Lung	0.394435	m3	Minimum	Similarity Distribution
neuroepithelial cell	brain	pericyte cell	Lung	0.259977	m3	Minimum	Similarity Distribution
hepatocyte	liver	regulatory T cell	Lung	0.151044	m3	Minimum	Similarity Distribution
mesenchymal stem cell	muscle	regulatory T cell	Lung	0.213621	m3	Minimum	Similarity Distribution
medium spiny neuron	brain	regulatory T cell	Lung	0.129826	m3	Minimum	Similarity Distribution
hepatocyte	liver	T cell	Lung	0.164559	m3	Minimum	Similarity Distribution
mesenchymal stem cell	muscle	T cell	Lung	0.201021	m3	Minimum	Similarity Distribution
medium spiny neuron	brain	T cell	Lung	0.143055	m3	Minimum	Similarity Distribution
T cell	lung	mature NK T cell	Liver	0.272804	m3	Minimum	Similarity Distribution
mesenchymal stem cell	muscle	mature NK T cell	Liver	0.38043	m3	Minimum	Similarity Distribution
neuroepithelial cell	brain	mature NK T cell	Liver	0.220711	m3	Minimum	Similarity Distribution
regulatory T cell	lung	hepatocyte	Liver	0.151044	m3	Minimum	Similarity Distribution
macrophage	muscle	hepatocyte	Liver	0.31733	m3	Minimum	Similarity Distribution
neuroepithelial cell	brain	hepatocyte	Liver	0.220758	m3	Minimum	Similarity Distribution
T cell	lung	endothelial cell of hepatic sinusoid	Liver	0.190146	m3	Minimum	Similarity Distribution
T cell	muscle	endothelial cell of hepatic sinusoid	Liver	0.413728	m3	Minimum	Similarity Distribution
neuroepithelial cell	brain	endothelial cell of hepatic sinusoid	Liver	0.25	m3	Minimum	Similarity Distribution
T cell	lung	Kupffer cell	Liver	0.218116	m3	Minimum	Similarity Distribution
endothelial cell	muscle	Kupffer cell	Liver	0.439959	m3	Minimum	Similarity Distribution
neuroepithelial cell	brain	Kupffer cell	Liver	0.23451	m3	Minimum	Similarity Distribution
T cell	lung	myeloid leukocyte	Liver	0.225141	m3	Minimum	Similarity Distribution
mesenchymal stem cell	muscle	myeloid leukocyte	Liver	0.372613	m3	Minimum	Similarity Distribution
neuroepithelial cell	brain	myeloid leukocyte	Liver	0.230247	m3	Minimum	Similarity Distribution
T cell	lung	B cell	Liver	0.245119	m3	Minimum	Similarity Distribution
mesenchymal stem cell	muscle	B cell	Liver	0.385618	m3	Minimum	Similarity Distribution
neuroepithelial cell	brain	B cell	Liver	0.223946	m3	Minimum	Similarity Distribution
ciliated columnar cell of tracheobronchial tree	lung	neutrophil	Liver	0.13863	m3	Minimum	Similarity Distribution
skeletal muscle satellite cell	muscle	neutrophil	Liver	0.22266	m3	Minimum	Similarity Distribution
medium spiny neuron	brain	neutrophil	Liver	0.0885519	m3	Minimum	Similarity Distribution
ciliated columnar cell of tracheobronchial tree	lung	T cell	Liver	0.241084	m3	Minimum	Similarity Distribution
mesenchymal stem cell	muscle	T cell	Liver	0.281185	m3	Minimum	Similarity Distribution
neuroepithelial cell	brain	T cell	Liver	0.198918	m3	Minimum	Similarity Distribution
T cell	lung	NK cell	Liver	0.263132	m3	Minimum	Similarity Distribution
mesenchymal stem cell	muscle	NK cell	Liver	0.336893	m3	Minimum	Similarity Distribution
neuroepithelial cell	brain	NK cell	Liver	0.205251	m3	Minimum	Similarity Distribution
ciliated columnar cell of tracheobronchial tree	lung	CD4-positive, alpha-beta T cell	Liver	0.189111	m3	Minimum	Similarity Distribution
mesenchymal stem cell	muscle	CD4-positive, alpha-beta T cell	Liver	0.250632	m3	Minimum	Similarity Distribution
ependymal cell	brain	CD4-positive, alpha-beta T cell	Liver	0.18175	m3	Minimum	Similarity Distribution
T cell	lung	skeletal muscle satellite cell	Muscle	0.212405	m3	Minimum	Similarity Distribution
neutrophil	liver	skeletal muscle satellite cell	Muscle	0.22266	m3	Minimum	Similarity Distribution
neuroepithelial cell	brain	skeletal muscle satellite cell	Muscle	0.316142	m3	Minimum	Similarity Distribution
T cell	lung	macrophage	Muscle	0.24607	m3	Minimum	Similarity Distribution
CD4-positive, alpha-beta T cell	liver	macrophage	Muscle	0.304822	m3	Minimum	Similarity Distribution
neuroepithelial cell	brain	macrophage	Muscle	0.250233	m3	Minimum	Similarity Distribution
T cell	lung	mesenchymal stem cell	Muscle	0.201021	m3	Minimum	Similarity Distribution
neutrophil	liver	mesenchymal stem cell	Muscle	0.223183	m3	Minimum	Similarity Distribution
neuroepithelial cell	brain	mesenchymal stem cell	Muscle	0.304515	m3	Minimum	Similarity Distribution
T cell	lung	endothelial cell	Muscle	0.20234	m3	Minimum	Similarity Distribution
CD4-positive, alpha-beta T cell	liver	endothelial cell	Muscle	0.255328	m3	Minimum	Similarity Distribution
neuroepithelial cell	brain	endothelial cell	Muscle	0.266349	m3	Minimum	Similarity Distribution
T cell	lung	B cell	Muscle	0.268208	m3	Minimum	Similarity Distribution
neutrophil	liver	B cell	Muscle	0.288042	m3	Minimum	Similarity Distribution
neuroepithelial cell	brain	B cell	Muscle	0.23063	m3	Minimum	Similarity Distribution
T cell	lung	T cell	Muscle	0.283054	m3	Minimum	Similarity Distribution
neutrophil	liver	T cell	Muscle	0.2774	m3	Minimum	Similarity Distribution
neuroepithelial cell	brain	T cell	Muscle	0.230001	m3	Minimum	Similarity Distribution
regulatory T cell	lung	ependymal cell	Brain	0.151824	m3	Minimum	Similarity Distribution
neutrophil	liver	ependymal cell	Brain	0.121149	m3	Minimum	Similarity Distribution
macrophage	muscle	ependymal cell	Brain	0.289425	m3	Minimum	Similarity Distribution
regulatory T cell	lung	astrocyte	Brain	0.175101	m3	Minimum	Similarity Distribution
neutrophil	liver	astrocyte	Brain	0.154775	m3	Minimum	Similarity Distribution
T cell	muscle	astrocyte	Brain	0.366546	m3	Minimum	Similarity Distribution
T cell	lung	oligodendrocyte	Brain	0.188734	m3	Minimum	Similarity Distribution
neutrophil	liver	oligodendrocyte	Brain	0.17136	m3	Minimum	Similarity Distribution
endothelial cell	muscle	oligodendrocyte	Brain	0.439781	m3	Minimum	Similarity Distribution
T cell	lung	endothelial cell	Brain	0.234625	m3	Minimum	Similarity Distribution
neutrophil	liver	endothelial cell	Brain	0.268884	m3	Minimum	Similarity Distribution
macrophage	muscle	endothelial cell	Brain	0.526921	m3	Minimum	Similarity Distribution
regulatory T cell	lung	neuron	Brain	0.145977	m3	Minimum	Similarity Distribution
neutrophil	liver	neuron	Brain	0.104947	m3	Minimum	Similarity Distribution
macrophage	muscle	neuron	Brain	0.283936	m3	Minimum	Similarity Distribution
regulatory T cell	lung	medium spiny neuron	Brain	0.129826	m3	Minimum	Similarity Distribution
neutrophil	liver	medium spiny neuron	Brain	0.0885519	m3	Minimum	Similarity Distribution
macrophage	muscle	medium spiny neuron	Brain	0.27233	m3	Minimum	Similarity Distribution
regulatory T cell	lung	interneuron	Brain	0.192272	m3	Minimum	Similarity Distribution
neutrophil	liver	interneuron	Brain	0.196676	m3	Minimum	Similarity Distribution
T cell	muscle	interneuron	Brain	0.348621	m3	Minimum	Similarity Distribution
regulatory T cell	lung	oligodendrocyte precursor cell	Brain	0.167171	m3	Minimum	Similarity Distribution
neutrophil	liver	oligodendrocyte precursor cell	Brain	0.119659	m3	Minimum	Similarity Distribution
macrophage	muscle	oligodendrocyte precursor cell	Brain	0.340774	m3	Minimum	Similarity Distribution
T cell	lung	neuronal stem cell	Brain	0.194774	m3	Minimum	Similarity Distribution
neutrophil	liver	neuronal stem cell	Brain	0.137884	m3	Minimum	Similarity Distribution
macrophage	muscle	neuronal stem cell	Brain	0.402684	m3	Minimum	Similarity Distribution
regulatory T cell	lung	Bergmann glial cell	Brain	0.161338	m3	Minimum	Similarity Distribution
neutrophil	liver	Bergmann glial cell	Brain	0.148852	m3	Minimum	Similarity Distribution
T cell	muscle	Bergmann glial cell	Brain	0.360454	m3	Minimum	Similarity Distribution
T cell	lung	brain pericyte	Brain	0.214003	m3	Minimum	Similarity Distribution
neutrophil	liver	brain pericyte	Brain	0.213514	m3	Minimum	Similarity Distribution
T cell	muscle	brain pericyte	Brain	0.450876	m3	Minimum	Similarity Distribution
T cell	lung	CD8-positive, alpha-beta T cell	Brain	0.284594	m3	Minimum	Similarity Distribution
neutrophil	liver	CD8-positive, alpha-beta T cell	Brain	0.279864	m3	Minimum	Similarity Distribution
mesenchymal stem cell	muscle	CD8-positive, alpha-beta T cell	Brain	0.371362	m3	Minimum	Similarity Distribution
ciliated columnar cell of tracheobronchial tree	lung	mature NK T cell	Brain	0.290382	m3	Minimum	Similarity Distribution
neutrophil	liver	mature NK T cell	Brain	0.282432	m3	Minimum	Similarity Distribution
mesenchymal stem cell	muscle	mature NK T cell	Brain	0.363117	m3	Minimum	Similarity Distribution
regulatory T cell	lung	neuroepithelial cell	Brain	0.18272	m3	Minimum	Similarity Distribution
neutrophil	liver	neuroepithelial cell	Brain	0.181876	m3	Minimum	Similarity Distribution
T cell	muscle	neuroepithelial cell	Brain	0.230001	m3	Minimum	Similarity Distribution
ciliated columnar cell of tracheobronchial tree	lung	T cell	Brain	0.265657	m3	Minimum	Similarity Distribution
hepatocyte	liver	T cell	Brain	0.259421	m3	Minimum	Similarity Distribution
mesenchymal stem cell	muscle	T cell	Brain	0.345547	m3	Minimum	Similarity Distribution
neutrophil	liver	bronchial smooth muscle cell	Lung	0.280998	m24	Minimum	Similarity Distribution
macrophage	muscle	bronchial smooth muscle cell	Lung	0.507801	m24	Minimum	Similarity Distribution
neuroepithelial cell	brain	bronchial smooth muscle cell	Lung	0.248619	m24	Minimum	Similarity Distribution
neutrophil	liver	fibroblast of lung	Lung	0.225875	m24	Minimum	Similarity Distribution
macrophage	muscle	fibroblast of lung	Lung	0.43464	m24	Minimum	Similarity Distribution
neuroepithelial cell	brain	fibroblast of lung	Lung	0.252726	m24	Minimum	Similarity Distribution
neutrophil	liver	vein endothelial cell	Lung	0.264934	m24	Minimum	Similarity Distribution
macrophage	muscle	vein endothelial cell	Lung	0.487082	m24	Minimum	Similarity Distribution
neuroepithelial cell	brain	vein endothelial cell	Lung	0.234786	m24	Minimum	Similarity Distribution
neutrophil	liver	adventitial cell	Lung	0.221115	m24	Minimum	Similarity Distribution
T cell	muscle	adventitial cell	Lung	0.378045	m24	Minimum	Similarity Distribution
neuroepithelial cell	brain	adventitial cell	Lung	0.239938	m24	Minimum	Similarity Distribution
neutrophil	liver	myeloid dendritic cell	Lung	0.398063	m24	Minimum	Similarity Distribution
mesenchymal stem cell	muscle	myeloid dendritic cell	Lung	0.478388	m24	Minimum	Similarity Distribution
neuroepithelial cell	brain	myeloid dendritic cell	Lung	0.206363	m24	Minimum	Similarity Distribution
neutrophil	liver	smooth muscle cell of the pulmonary artery	Lung	0.261864	m24	Minimum	Similarity Distribution
macrophage	muscle	smooth muscle cell of the pulmonary artery	Lung	0.400873	m24	Minimum	Similarity Distribution
neuroepithelial cell	brain	smooth muscle cell of the pulmonary artery	Lung	0.216667	m24	Minimum	Similarity Distribution
neutrophil	liver	pulmonary interstitial fibroblast	Lung	0.266236	m24	Minimum	Similarity Distribution
T cell	muscle	pulmonary interstitial fibroblast	Lung	0.365131	m24	Minimum	Similarity Distribution
neuroepithelial cell	brain	pulmonary interstitial fibroblast	Lung	0.206797	m24	Minimum	Similarity Distribution
CD4-positive, alpha-beta T cell	liver	dendritic cell	Lung	0.515109	m24	Minimum	Similarity Distribution
endothelial cell	muscle	dendritic cell	Lung	0.488893	m24	Minimum	Similarity Distribution
neuroepithelial cell	brain	dendritic cell	Lung	0.219213	m24	Minimum	Similarity Distribution
neutrophil	liver	endothelial cell of lymphatic vessel	Lung	0.26739	m24	Minimum	Similarity Distribution
macrophage	muscle	endothelial cell of lymphatic vessel	Lung	0.455834	m24	Minimum	Similarity Distribution
neuroepithelial cell	brain	endothelial cell of lymphatic vessel	Lung	0.243882	m24	Minimum	Similarity Distribution
CD4-positive, alpha-beta T cell	liver	non-classical monocyte	Lung	0.510286	m24	Minimum	Similarity Distribution
mesenchymal stem cell	muscle	non-classical monocyte	Lung	0.472906	m24	Minimum	Similarity Distribution
neuroepithelial cell	brain	non-classical monocyte	Lung	0.213746	m24	Minimum	Similarity Distribution
CD4-positive, alpha-beta T cell	liver	classical monocyte	Lung	0.553448	m24	Minimum	Similarity Distribution
mesenchymal stem cell	muscle	classical monocyte	Lung	0.508383	m24	Minimum	Similarity Distribution
neuroepithelial cell	brain	classical monocyte	Lung	0.2081	m24	Minimum	Similarity Distribution
neutrophil	liver	B cell	Lung	0.333906	m24	Minimum	Similarity Distribution
mesenchymal stem cell	muscle	B cell	Lung	0.492401	m24	Minimum	Similarity Distribution
neuroepithelial cell	brain	B cell	Lung	0.218981	m24	Minimum	Similarity Distribution
neutrophil	liver	CD4-positive, alpha-beta T cell	Lung	0.222029	m24	Minimum	Similarity Distribution
mesenchymal stem cell	muscle	CD4-positive, alpha-beta T cell	Lung	0.2579	m24	Minimum	Similarity Distribution
neuroepithelial cell	brain	CD4-positive, alpha-beta T cell	Lung	0.145713	m24	Minimum	Similarity Distribution
neutrophil	liver	NK cell	Lung	0.306029	m24	Minimum	Similarity Distribution
mesenchymal stem cell	muscle	NK cell	Lung	0.416219	m24	Minimum	Similarity Distribution
neuroepithelial cell	brain	NK cell	Lung	0.197174	m24	Minimum	Similarity Distribution
neutrophil	liver	type II pneumocyte	Lung	0.256266	m24	Minimum	Similarity Distribution
macrophage	muscle	type II pneumocyte	Lung	0.47654	m24	Minimum	Similarity Distribution
neuroepithelial cell	brain	type II pneumocyte	Lung	0.244825	m24	Minimum	Similarity Distribution
neutrophil	liver	ciliated columnar cell of tracheobronchial tree	Lung	0.182668	m24	Minimum	Similarity Distribution
macrophage	muscle	ciliated columnar cell of tracheobronchial tree	Lung	0.361425	m24	Minimum	Similarity Distribution
T cell	brain	ciliated columnar cell of tracheobronchial tree	Lung	0.31385	m24	Minimum	Similarity Distribution
neutrophil	liver	CD8-positive, alpha-beta T cell	Lung	0.312085	m24	Minimum	Similarity Distribution
mesenchymal stem cell	muscle	CD8-positive, alpha-beta T cell	Lung	0.461942	m24	Minimum	Similarity Distribution
neuroepithelial cell	brain	CD8-positive, alpha-beta T cell	Lung	0.187871	m24	Minimum	Similarity Distribution
hepatocyte	liver	neutrophil	Lung	0.334008	m24	Minimum	Similarity Distribution
mesenchymal stem cell	muscle	neutrophil	Lung	0.42776	m24	Minimum	Similarity Distribution
medium spiny neuron	brain	neutrophil	Lung	0.242986	m24	Minimum	Similarity Distribution
CD4-positive, alpha-beta T cell	liver	leukocyte	Lung	0.515012	m24	Minimum	Similarity Distribution
endothelial cell	muscle	leukocyte	Lung	0.43694	m24	Minimum	Similarity Distribution
medium spiny neuron	brain	leukocyte	Lung	0.245137	m24	Minimum	Similarity Distribution
neutrophil	liver	club cell of bronchiole	Lung	0.229615	m24	Minimum	Similarity Distribution
T cell	muscle	club cell of bronchiole	Lung	0.40065	m24	Minimum	Similarity Distribution
medium spiny neuron	brain	club cell of bronchiole	Lung	0.239127	m24	Minimum	Similarity Distribution
neutrophil	liver	pericyte cell	Lung	0.23114	m24	Minimum	Similarity Distribution
macrophage	muscle	pericyte cell	Lung	0.372594	m24	Minimum	Similarity Distribution
neuroepithelial cell	brain	pericyte cell	Lung	0.200339	m24	Minimum	Similarity Distribution
hepatocyte	liver	regulatory T cell	Lung	0.30275	m24	Minimum	Similarity Distribution
mesenchymal stem cell	muscle	regulatory T cell	Lung	0.430549	m24	Minimum	Similarity Distribution
medium spiny neuron	brain	regulatory T cell	Lung	0.288601	m24	Minimum	Similarity Distribution
hepatocyte	liver	T cell	Lung	0.335689	m24	Minimum	Similarity Distribution
mesenchymal stem cell	muscle	T cell	Lung	0.463764	m24	Minimum	Similarity Distribution
medium spiny neuron	brain	T cell	Lung	0.292366	m24	Minimum	Similarity Distribution
T cell	lung	mature NK T cell	Liver	0.661441	m24	Minimum	Similarity Distribution
mesenchymal stem cell	muscle	mature NK T cell	Liver	0.432816	m24	Minimum	Similarity Distribution
neuroepithelial cell	brain	mature NK T cell	Liver	0.195702	m24	Minimum	Similarity Distribution
regulatory T cell	lung	hepatocyte	Liver	0.30275	m24	Minimum	Similarity Distribution
macrophage	muscle	hepatocyte	Liver	0.348551	m24	Minimum	Similarity Distribution
neuroepithelial cell	brain	hepatocyte	Liver	0.199991	m24	Minimum	Similarity Distribution
T cell	lung	endothelial cell of hepatic sinusoid	Liver	0.395285	m24	Minimum	Similarity Distribution
T cell	muscle	endothelial cell of hepatic sinusoid	Liver	0.353601	m24	Minimum	Similarity Distribution
neuroepithelial cell	brain	endothelial cell of hepatic sinusoid	Liver	0.24555	m24	Minimum	Similarity Distribution
T cell	lung	Kupffer cell	Liver	0.457154	m24	Minimum	Similarity Distribution
endothelial cell	muscle	Kupffer cell	Liver	0.398436	m24	Minimum	Similarity Distribution
neuroepithelial cell	brain	Kupffer cell	Liver	0.198427	m24	Minimum	Similarity Distribution
T cell	lung	myeloid leukocyte	Liver	0.561128	m24	Minimum	Similarity Distribution
mesenchymal stem cell	muscle	myeloid leukocyte	Liver	0.465912	m24	Minimum	Similarity Distribution
neuroepithelial cell	brain	myeloid leukocyte	Liver	0.2098	m24	Minimum	Similarity Distribution
T cell	lung	B cell	Liver	0.556604	m24	Minimum	Similarity Distribution
mesenchymal stem cell	muscle	B cell	Liver	0.425348	m24	Minimum	Similarity Distribution
neuroepithelial cell	brain	B cell	Liver	0.213333	m24	Minimum	Similarity Distribution
ciliated columnar cell of tracheobronchial tree	lung	neutrophil	Liver	0.182668	m24	Minimum	Similarity Distribution
skeletal muscle satellite cell	muscle	neutrophil	Liver	0.274181	m24	Minimum	Similarity Distribution
medium spiny neuron	brain	neutrophil	Liver	0.15336	m24	Minimum	Similarity Distribution
ciliated columnar cell of tracheobronchial tree	lung	T cell	Liver	0.318618	m24	Minimum	Similarity Distribution
mesenchymal stem cell	muscle	T cell	Liver	0.400436	m24	Minimum	Similarity Distribution
neuroepithelial cell	brain	T cell	Liver	0.188279	m24	Minimum	Similarity Distribution
T cell	lung	NK cell	Liver	0.57003	m24	Minimum	Similarity Distribution
mesenchymal stem cell	muscle	NK cell	Liver	0.413346	m24	Minimum	Similarity Distribution
neuroepithelial cell	brain	NK cell	Liver	0.190302	m24	Minimum	Similarity Distribution
ciliated columnar cell of tracheobronchial tree	lung	CD4-positive, alpha-beta T cell	Liver	0.335555	m24	Minimum	Similarity Distribution
mesenchymal stem cell	muscle	CD4-positive, alpha-beta T cell	Liver	0.430384	m24	Minimum	Similarity Distribution
ependymal cell	brain	CD4-positive, alpha-beta T cell	Liver	0.274596	m24	Minimum	Similarity Distribution
T cell	lung	skeletal muscle satellite cell	Muscle	0.497107	m24	Minimum	Similarity Distribution
neutrophil	liver	skeletal muscle satellite cell	Muscle	0.274181	m24	Minimum	Similarity Distribution
neuroepithelial cell	brain	skeletal muscle satellite cell	Muscle	0.296555	m24	Minimum	Similarity Distribution
T cell	lung	macrophage	Muscle	0.516128	m24	Minimum	Similarity Distribution
CD4-positive, alpha-beta T cell	liver	macrophage	Muscle	0.478325	m24	Minimum	Similarity Distribution
neuroepithelial cell	brain	macrophage	Muscle	0.207904	m24	Minimum	Similarity Distribution
T cell	lung	mesenchymal stem cell	Muscle	0.463764	m24	Minimum	Similarity Distribution
neutrophil	liver	mesenchymal stem cell	Muscle	0.268527	m24	Minimum	Similarity Distribution
neuroepithelial cell	brain	mesenchymal stem cell	Muscle	0.275183	m24	Minimum	Similarity Distribution
T cell	lung	endothelial cell	Muscle	0.436974	m24	Minimum	Similarity Distribution
CD4-positive, alpha-beta T cell	liver	endothelial cell	Muscle	0.409201	m24	Minimum	Similarity Distribution
neuroepithelial cell	brain	endothelial cell	Muscle	0.240105	m24	Minimum	Similarity Distribution
T cell	lung	B cell	Muscle	0.56404	m24	Minimum	Similarity Distribution
neutrophil	liver	B cell	Muscle	0.334938	m24	Minimum	Similarity Distribution
neuroepithelial cell	brain	B cell	Muscle	0.201077	m24	Minimum	Similarity Distribution
T cell	lung	T cell	Muscle	0.644782	m24	Minimum	Similarity Distribution
neutrophil	liver	T cell	Muscle	0.324143	m24	Minimum	Similarity Distribution
neuroepithelial cell	brain	T cell	Muscle	0.187247	m24	Minimum	Similarity Distribution
regulatory T cell	lung	ependymal cell	Brain	0.273245	m24	Minimum	Similarity Distribution
neutrophil	liver	ependymal cell	Brain	0.163284	m24	Minimum	Similarity Distribution
macrophage	muscle	ependymal cell	Brain	0.285022	m24	Minimum	Similarity Distribution
regulatory T cell	lung	astrocyte	Brain	0.330527	m24	Minimum	Similarity Distribution
neutrophil	liver	astrocyte	Brain	0.182259	m24	Minimum	Similarity Distribution
T cell	muscle	astrocyte	Brain	0.323997	m24	Minimum	Similarity Distribution
T cell	lung	oligodendrocyte	Brain	0.47153	m24	Minimum	Similarity Distribution
neutrophil	liver	oligodendrocyte	Brain	0.218073	m24	Minimum	Similarity Distribution
endothelial cell	muscle	oligodendrocyte	Brain	0.445894	m24	Minimum	Similarity Distribution
T cell	lung	endothelial cell	Brain	0.51665	m24	Minimum	Similarity Distribution
neutrophil	liver	endothelial cell	Brain	0.312089	m24	Minimum	Similarity Distribution
macrophage	muscle	endothelial cell	Brain	0.518409	m24	Minimum	Similarity Distribution
regulatory T cell	lung	neuron	Brain	0.298856	m24	Minimum	Similarity Distribution
neutrophil	liver	neuron	Brain	0.162818	m24	Minimum	Similarity Distribution
macrophage	muscle	neuron	Brain	0.250397	m24	Minimum	Similarity Distribution
regulatory T cell	lung	medium spiny neuron	Brain	0.288601	m24	Minimum	Similarity Distribution
neutrophil	liver	medium spiny neuron	Brain	0.15336	m24	Minimum	Similarity Distribution
macrophage	muscle	medium spiny neuron	Brain	0.247344	m24	Minimum	Similarity Distribution
regulatory T cell	lung	interneuron	Brain	0.357825	m24	Minimum	Similarity Distribution
neutrophil	liver	interneuron	Brain	0.207551	m24	Minimum	Similarity Distribution
T cell	muscle	interneuron	Brain	0.356255	m24	Minimum	Similarity Distribution
regulatory T cell	lung	oligodendrocyte precursor cell	Brain	0.345775	m24	Minimum	Similarity Distribution
neutrophil	liver	oligodendrocyte precursor cell	Brain	0.162761	m24	Minimum	Similarity Distribution
macrophage	muscle	oligodendrocyte precursor cell	Brain	0.32873	m24	Minimum	Similarity Distribution
T cell	lung	neuronal stem cell	Brain	0.219165	m24	Minimum	Similarity Distribution
neutrophil	liver	neuronal stem cell	Brain	0.129875	m24	Minimum	Similarity Distribution
macrophage	muscle	neuronal stem cell	Brain	0.198292	m24	Minimum	Similarity Distribution
regulatory T cell	lung	Bergmann glial cell	Brain	0.296473	m24	Minimum	Similarity Distribution
neutrophil	liver	Bergmann glial cell	Brain	0.199407	m24	Minimum	Similarity Distribution
T cell	muscle	Bergmann glial cell	Brain	0.279063	m24	Minimum	Similarity Distribution
T cell	lung	brain pericyte	Brain	0.424397	m24	Minimum	Similarity Distribution
neutrophil	liver	brain pericyte	Brain	0.263882	m24	Minimum	Similarity Distribution
T cell	muscle	brain pericyte	Brain	0.392541	m24	Minimum	Similarity Distribution
T cell	lung	CD8-positive, alpha-beta T cell	Brain	0.62478	m24	Minimum	Similarity Distribution
neutrophil	liver	CD8-positive, alpha-beta T cell	Brain	0.312478	m24	Minimum	Similarity Distribution
mesenchymal stem cell	muscle	CD8-positive, alpha-beta T cell	Brain	0.444991	m24	Minimum	Similarity Distribution
ciliated columnar cell of tracheobronchial tree	lung	mature NK T cell	Brain	0.264734	m24	Minimum	Similarity Distribution
neutrophil	liver	mature NK T cell	Brain	0.298987	m24	Minimum	Similarity Distribution
mesenchymal stem cell	muscle	mature NK T cell	Brain	0.382601	m24	Minimum	Similarity Distribution
regulatory T cell	lung	neuroepithelial cell	Brain	0.20098	m24	Minimum	Similarity Distribution
neutrophil	liver	neuroepithelial cell	Brain	0.16778	m24	Minimum	Similarity Distribution
T cell	muscle	neuroepithelial cell	Brain	0.187247	m24	Minimum	Similarity Distribution
ciliated columnar cell of tracheobronchial tree	lung	T cell	Brain	0.31385	m24	Minimum	Similarity Distribution
hepatocyte	liver	T cell	Brain	0.293666	m24	Minimum	Similarity Distribution
mesenchymal stem cell	muscle	T cell	Brain	0.417332	m24	Minimum	Similarity Distribution

## Sheet: sdata3
1st tissue	1st cell type	minx	Correlation	var
Lung	T cell	Maximum	0.84	Tissue Similarity Change
Lung	CD8-positive, alpha-beta T cell	Maximum	0.63	Tissue Similarity Change
Lung	regulatory T cell	Maximum	0.58	Tissue Similarity Change
Liver	CD4-positive, alpha-beta T cell	Maximum	0.42	Tissue Similarity Change
Lung	club cell of bronchiole	Maximum	0.42	Tissue Similarity Change
Lung	leukocyte	Maximum	0.42	Tissue Similarity Change
Liver	NK cell	Maximum	0.32	Tissue Similarity Change
Lung	dendritic cell	Maximum	0.32	Tissue Similarity Change
Brain	T cell	Maximum	0.26	Tissue Similarity Change
Liver	T cell	Maximum	0.26	Tissue Similarity Change
Lung	neutrophil	Maximum	0.26	Tissue Similarity Change
Brain	CD8-positive, alpha-beta T cell	Maximum	0.21	Tissue Similarity Change
Liver	mature NK T cell	Maximum	0.21	Tissue Similarity Change
Liver	myeloid leukocyte	Maximum	0.21	Tissue Similarity Change
Liver	neutrophil	Maximum	0.21	Tissue Similarity Change
Lung	myeloid dendritic cell	Maximum	0.21	Tissue Similarity Change
Lung	fibroblast of lung	Maximum	0.16	Tissue Similarity Change
Liver	Kupffer cell	Maximum	0	Tissue Similarity Change
Brain	neuroepithelial cell	Maximum	-0.05	Tissue Similarity Change
Brain	oligodendrocyte	Maximum	-0.05	Tissue Similarity Change
Liver	B cell	Maximum	-0.05	Tissue Similarity Change
Lung	B cell	Maximum	-0.05	Tissue Similarity Change
Lung	non-classical monocyte	Maximum	-0.05	Tissue Similarity Change
Lung	classical monocyte	Maximum	-0.11	Tissue Similarity Change
Lung	adventitial cell	Maximum	-0.16	Tissue Similarity Change
Lung	ciliated columnar cell of tracheobronchial tree	Maximum	-0.16	Tissue Similarity Change
Lung	type II pneumocyte	Maximum	-0.16	Tissue Similarity Change
Muscle	macrophage	Maximum	-0.16	Tissue Similarity Change
Muscle	mesenchymal stem cell	Maximum	-0.16	Tissue Similarity Change
Brain	endothelial cell	Maximum	-0.21	Tissue Similarity Change
Muscle	T cell	Maximum	-0.21	Tissue Similarity Change
Brain	ependymal cell	Maximum	-0.26	Tissue Similarity Change
Lung	bronchial smooth muscle cell	Maximum	-0.26	Tissue Similarity Change
Lung	vein endothelial cell	Maximum	-0.26	Tissue Similarity Change
Brain	oligodendrocyte precursor cell	Maximum	-0.32	Tissue Similarity Change
Muscle	skeletal muscle satellite cell	Maximum	-0.32	Tissue Similarity Change
Brain	brain pericyte	Maximum	-0.37	Tissue Similarity Change
Lung	endothelial cell of lymphatic vessel	Maximum	-0.37	Tissue Similarity Change
Muscle	endothelial cell	Maximum	-0.37	Tissue Similarity Change
Muscle	B cell	Maximum	-0.42	Tissue Similarity Change
Brain	interneuron	Maximum	-0.47	Tissue Similarity Change
Brain	neuron	Maximum	-0.47	Tissue Similarity Change
Liver	endothelial cell of hepatic sinusoid	Maximum	-0.47	Tissue Similarity Change
Liver	hepatocyte	Maximum	-0.53	Tissue Similarity Change
Brain	medium spiny neuron	Maximum	-0.58	Tissue Similarity Change
Lung	pericyte cell	Maximum	-0.58	Tissue Similarity Change
Lung	smooth muscle cell of the pulmonary artery	Maximum	-0.58	Tissue Similarity Change
Lung	NK cell	Maximum	-0.69	Tissue Similarity Change
Brain	astrocyte	Maximum	-0.74	Tissue Similarity Change
Lung	CD4-positive, alpha-beta T cell	Maximum	-0.74	Tissue Similarity Change
Brain	mature NK T cell	Maximum	-0.79	Tissue Similarity Change
Brain	neuronal stem cell	Maximum	-0.79	Tissue Similarity Change
Brain	Bergmann glial cell	Maximum	-0.84	Tissue Similarity Change
Lung	pulmonary interstitial fibroblast	Maximum	-0.84	Tissue Similarity Change
Lung	T cell	Minimum	0.63	Tissue Similarity Change
Lung	CD8-positive, alpha-beta T cell	Minimum	0.16	Tissue Similarity Change
Lung	regulatory T cell	Minimum	0.58	Tissue Similarity Change
Liver	CD4-positive, alpha-beta T cell	Minimum	0.69	Tissue Similarity Change
Lung	club cell of bronchiole	Minimum	0.05	Tissue Similarity Change
Lung	leukocyte	Minimum	0.32	Tissue Similarity Change
Liver	NK cell	Minimum	0.26	Tissue Similarity Change
Lung	dendritic cell	Minimum	0.32	Tissue Similarity Change
Brain	T cell	Minimum	0.26	Tissue Similarity Change
Liver	T cell	Minimum	0.32	Tissue Similarity Change
Lung	neutrophil	Minimum	0.32	Tissue Similarity Change
Brain	CD8-positive, alpha-beta T cell	Minimum	0.58	Tissue Similarity Change
Liver	mature NK T cell	Minimum	0.26	Tissue Similarity Change
Liver	myeloid leukocyte	Minimum	0.37	Tissue Similarity Change
Liver	neutrophil	Minimum	0.32	Tissue Similarity Change
Lung	myeloid dendritic cell	Minimum	0.11	Tissue Similarity Change
Lung	fibroblast of lung	Minimum	0.11	Tissue Similarity Change
Liver	Kupffer cell	Minimum	0.11	Tissue Similarity Change
Brain	neuroepithelial cell	Minimum	-0.05	Tissue Similarity Change
Brain	oligodendrocyte	Minimum	0.47	Tissue Similarity Change
Liver	B cell	Minimum	0.26	Tissue Similarity Change
Lung	B cell	Minimum	0.16	Tissue Similarity Change
Lung	non-classical monocyte	Minimum	0.37	Tissue Similarity Change
Lung	classical monocyte	Minimum	0.32	Tissue Similarity Change
Lung	adventitial cell	Minimum	0.05	Tissue Similarity Change
Lung	ciliated columnar cell of tracheobronchial tree	Minimum	0.16	Tissue Similarity Change
Lung	type II pneumocyte	Minimum	0.11	Tissue Similarity Change
Muscle	macrophage	Minimum	0.32	Tissue Similarity Change
Muscle	mesenchymal stem cell	Minimum	0.37	Tissue Similarity Change
Brain	endothelial cell	Minimum	0.16	Tissue Similarity Change
Muscle	T cell	Minimum	0.32	Tissue Similarity Change
Brain	ependymal cell	Minimum	0.21	Tissue Similarity Change
Lung	bronchial smooth muscle cell	Minimum	0.05	Tissue Similarity Change
Lung	vein endothelial cell	Minimum	-0.05	Tissue Similarity Change
Brain	oligodendrocyte precursor cell	Minimum	0.21	Tissue Similarity Change
Muscle	skeletal muscle satellite cell	Minimum	0.42	Tissue Similarity Change
Brain	brain pericyte	Minimum	0.21	Tissue Similarity Change
Lung	endothelial cell of lymphatic vessel	Minimum	0.05	Tissue Similarity Change
Muscle	endothelial cell	Minimum	0.42	Tissue Similarity Change
Muscle	B cell	Minimum	0.32	Tissue Similarity Change
Brain	interneuron	Minimum	0.42	Tissue Similarity Change
Brain	neuron	Minimum	0.32	Tissue Similarity Change
Liver	endothelial cell of hepatic sinusoid	Minimum	0.05	Tissue Similarity Change
Liver	hepatocyte	Minimum	0.16	Tissue Similarity Change
Brain	medium spiny neuron	Minimum	0.32	Tissue Similarity Change
Lung	pericyte cell	Minimum	-0.05	Tissue Similarity Change
Lung	smooth muscle cell of the pulmonary artery	Minimum	-0.26	Tissue Similarity Change
Lung	NK cell	Minimum	-0.05	Tissue Similarity Change
Brain	astrocyte	Minimum	0.16	Tissue Similarity Change
Lung	CD4-positive, alpha-beta T cell	Minimum	-0.42	Tissue Similarity Change
Brain	mature NK T cell	Minimum	0	Tissue Similarity Change
Brain	neuronal stem cell	Minimum	-0.11	Tissue Similarity Change
Brain	Bergmann glial cell	Minimum	0.05	Tissue Similarity Change
Lung	pulmonary interstitial fibroblast	Minimum	-0.05	Tissue Similarity Change

## Sheet: sdata4
cell type	id	proportion	tissue	Geneset	age
neuron	s1	1.15486	Cortex	All-genes	2
oligodendrocyte	s1	0.481871	Cortex	All-genes	2
interneuron	s1	0.77744	Cortex	All-genes	2
astrocyte	s1	0.313273	Cortex	All-genes	2
medium spiny neuron	s1	0.480619	Cortex	All-genes	2
endothelial cell	s1	0.729978	Cortex	All-genes	2
oligodendrocyte precursor cell	s1	0.472358	Cortex	All-genes	2
neuronal stem cell	s1	1.15801	Cortex	All-genes	2
brain pericyte	s1	0.140571	Cortex	All-genes	2
Bergmann glial cell	s1	-0.0423431	Cortex	All-genes	2
T cell	s1	0.0173129	Cortex	All-genes	2
mature NK T cell	s1	-0.001857	Cortex	All-genes	2
CD8-positive, alpha-beta T cell	s1	-0.00028999	Cortex	All-genes	2
ependymal cell	s1	-0.018307	Cortex	All-genes	2
neuroepithelial cell	s1	-0.0308156	Cortex	All-genes	2
neuron	s2	1.10967	Cortex	All-genes	2
oligodendrocyte	s2	0.466741	Cortex	All-genes	2
interneuron	s2	0.826359	Cortex	All-genes	2
astrocyte	s2	0.336942	Cortex	All-genes	2
medium spiny neuron	s2	0.471077	Cortex	All-genes	2
endothelial cell	s2	0.763398	Cortex	All-genes	2
oligodendrocyte precursor cell	s2	0.460768	Cortex	All-genes	2
neuronal stem cell	s2	1.0551	Cortex	All-genes	2
brain pericyte	s2	0.207112	Cortex	All-genes	2
Bergmann glial cell	s2	-0.0384482	Cortex	All-genes	2
T cell	s2	0.0288868	Cortex	All-genes	2
mature NK T cell	s2	-0.00934564	Cortex	All-genes	2
CD8-positive, alpha-beta T cell	s2	-0.0113202	Cortex	All-genes	2
ependymal cell	s2	-0.0317245	Cortex	All-genes	2
neuroepithelial cell	s2	-0.0349872	Cortex	All-genes	2
neuron	s3	1.20864	Cortex	All-genes	5
oligodendrocyte	s3	0.515393	Cortex	All-genes	5
interneuron	s3	0.795205	Cortex	All-genes	5
astrocyte	s3	0.455945	Cortex	All-genes	5
medium spiny neuron	s3	0.526658	Cortex	All-genes	5
endothelial cell	s3	0.698229	Cortex	All-genes	5
oligodendrocyte precursor cell	s3	0.512895	Cortex	All-genes	5
neuronal stem cell	s3	0.892873	Cortex	All-genes	5
brain pericyte	s3	0.178849	Cortex	All-genes	5
Bergmann glial cell	s3	-0.0197252	Cortex	All-genes	5
T cell	s3	0.0173472	Cortex	All-genes	5
mature NK T cell	s3	-0.00912501	Cortex	All-genes	5
CD8-positive, alpha-beta T cell	s3	-0.0158762	Cortex	All-genes	5
ependymal cell	s3	-0.0200346	Cortex	All-genes	5
neuroepithelial cell	s3	-0.0373503	Cortex	All-genes	5
neuron	s4	1.29517	Cortex	All-genes	11
oligodendrocyte	s4	0.739931	Cortex	All-genes	11
interneuron	s4	0.79544	Cortex	All-genes	11
astrocyte	s4	0.714436	Cortex	All-genes	11
medium spiny neuron	s4	0.662672	Cortex	All-genes	11
endothelial cell	s4	0.61387	Cortex	All-genes	11
oligodendrocyte precursor cell	s4	0.484207	Cortex	All-genes	11
neuronal stem cell	s4	0.416951	Cortex	All-genes	11
brain pericyte	s4	0.158873	Cortex	All-genes	11
Bergmann glial cell	s4	-0.000413629	Cortex	All-genes	11
T cell	s4	0.00970855	Cortex	All-genes	11
mature NK T cell	s4	-0.0034017	Cortex	All-genes	11
CD8-positive, alpha-beta T cell	s4	-0.0287044	Cortex	All-genes	11
ependymal cell	s4	-0.0432753	Cortex	All-genes	11
neuroepithelial cell	s4	-0.0683925	Cortex	All-genes	11
neuron	s5	1.27318	Cortex	All-genes	20
oligodendrocyte	s5	0.996117	Cortex	All-genes	20
interneuron	s5	0.845113	Cortex	All-genes	20
astrocyte	s5	0.827017	Cortex	All-genes	20
medium spiny neuron	s5	0.76795	Cortex	All-genes	20
endothelial cell	s5	0.604288	Cortex	All-genes	20
oligodendrocyte precursor cell	s5	0.333379	Cortex	All-genes	20
neuronal stem cell	s5	0.117286	Cortex	All-genes	20
brain pericyte	s5	0.15954	Cortex	All-genes	20
Bergmann glial cell	s5	0.0219591	Cortex	All-genes	20
T cell	s5	-0.00805528	Cortex	All-genes	20
mature NK T cell	s5	-0.00933525	Cortex	All-genes	20
CD8-positive, alpha-beta T cell	s5	-0.0342558	Cortex	All-genes	20
ependymal cell	s5	-0.0598737	Cortex	All-genes	20
neuroepithelial cell	s5	-0.0831878	Cortex	All-genes	20
neuron	s6	1.3047	Cortex	All-genes	32
oligodendrocyte	s6	1.02304	Cortex	All-genes	32
interneuron	s6	0.854914	Cortex	All-genes	32
astrocyte	s6	0.894046	Cortex	All-genes	32
medium spiny neuron	s6	0.756997	Cortex	All-genes	32
endothelial cell	s6	0.606721	Cortex	All-genes	32
oligodendrocyte precursor cell	s6	0.320104	Cortex	All-genes	32
neuronal stem cell	s6	0.0943756	Cortex	All-genes	32
brain pericyte	s6	0.134208	Cortex	All-genes	32
Bergmann glial cell	s6	0.0406358	Cortex	All-genes	32
T cell	s6	0.00725982	Cortex	All-genes	32
mature NK T cell	s6	-0.0023442	Cortex	All-genes	32
CD8-positive, alpha-beta T cell	s6	-0.0282757	Cortex	All-genes	32
ependymal cell	s6	-0.0422534	Cortex	All-genes	32
neuroepithelial cell	s6	-0.0756728	Cortex	All-genes	32
neuron	s7	1.12585	Cortex	All-genes	61
oligodendrocyte	s7	1.07693	Cortex	All-genes	61
interneuron	s7	0.83381	Cortex	All-genes	61
astrocyte	s7	0.918541	Cortex	All-genes	61
medium spiny neuron	s7	0.886333	Cortex	All-genes	61
endothelial cell	s7	0.578541	Cortex	All-genes	61
oligodendrocyte precursor cell	s7	0.282599	Cortex	All-genes	61
neuronal stem cell	s7	0.0776327	Cortex	All-genes	61
brain pericyte	s7	0.152777	Cortex	All-genes	61
Bergmann glial cell	s7	0.0354893	Cortex	All-genes	61
T cell	s7	0.0179446	Cortex	All-genes	61
mature NK T cell	s7	-0.000812526	Cortex	All-genes	61
CD8-positive, alpha-beta T cell	s7	-0.0218458	Cortex	All-genes	61
ependymal cell	s7	-0.020466	Cortex	All-genes	61
neuroepithelial cell	s7	-0.0677937	Cortex	All-genes	61
neuron	s8	1.36794	Cortex	All-genes	93
oligodendrocyte	s8	1.02172	Cortex	All-genes	93
interneuron	s8	0.843729	Cortex	All-genes	93
astrocyte	s8	0.893726	Cortex	All-genes	93
medium spiny neuron	s8	0.763937	Cortex	All-genes	93
endothelial cell	s8	0.588247	Cortex	All-genes	93
oligodendrocyte precursor cell	s8	0.312574	Cortex	All-genes	93
neuronal stem cell	s8	0.0380378	Cortex	All-genes	93
brain pericyte	s8	0.143555	Cortex	All-genes	93
Bergmann glial cell	s8	0.0402943	Cortex	All-genes	93
T cell	s8	-0.00375314	Cortex	All-genes	93
mature NK T cell	s8	-0.0045548	Cortex	All-genes	93
CD8-positive, alpha-beta T cell	s8	-0.015119	Cortex	All-genes	93
ependymal cell	s8	-0.0425214	Cortex	All-genes	93
neuroepithelial cell	s8	-0.0855285	Cortex	All-genes	93
neuron	s9	1.38631	Cortex	All-genes	93
oligodendrocyte	s9	0.928783	Cortex	All-genes	93
interneuron	s9	0.875652	Cortex	All-genes	93
astrocyte	s9	0.882685	Cortex	All-genes	93
medium spiny neuron	s9	0.704857	Cortex	All-genes	93
endothelial cell	s9	0.618998	Cortex	All-genes	93
oligodendrocyte precursor cell	s9	0.331233	Cortex	All-genes	93
neuronal stem cell	s9	0.135044	Cortex	All-genes	93
brain pericyte	s9	0.162475	Cortex	All-genes	93
Bergmann glial cell	s9	0.0592125	Cortex	All-genes	93
T cell	s9	0.00442384	Cortex	All-genes	93
mature NK T cell	s9	-0.00568414	Cortex	All-genes	93
CD8-positive, alpha-beta T cell	s9	-0.0292368	Cortex	All-genes	93
ependymal cell	s9	-0.0339249	Cortex	All-genes	93
neuroepithelial cell	s9	-0.0670581	Cortex	All-genes	93
neuron	s10	1.30591	Cortex	All-genes	144
oligodendrocyte	s10	1.01794	Cortex	All-genes	144
interneuron	s10	0.848414	Cortex	All-genes	144
astrocyte	s10	0.884702	Cortex	All-genes	144
medium spiny neuron	s10	0.74882	Cortex	All-genes	144
endothelial cell	s10	0.574792	Cortex	All-genes	144
oligodendrocyte precursor cell	s10	0.315806	Cortex	All-genes	144
neuronal stem cell	s10	0.0612664	Cortex	All-genes	144
brain pericyte	s10	0.17529	Cortex	All-genes	144
Bergmann glial cell	s10	0.0257368	Cortex	All-genes	144
T cell	s10	0.0188479	Cortex	All-genes	144
mature NK T cell	s10	0.00513821	Cortex	All-genes	144
CD8-positive, alpha-beta T cell	s10	-0.0242834	Cortex	All-genes	144
ependymal cell	s10	-0.0190821	Cortex	All-genes	144
neuroepithelial cell	s10	-0.0639258	Cortex	All-genes	144
neuron	s11	1.38799	Cortex	All-genes	232
oligodendrocyte	s11	1.01401	Cortex	All-genes	232
interneuron	s11	0.860458	Cortex	All-genes	232
astrocyte	s11	0.845081	Cortex	All-genes	232
medium spiny neuron	s11	0.728922	Cortex	All-genes	232
endothelial cell	s11	0.587338	Cortex	All-genes	232
oligodendrocyte precursor cell	s11	0.325308	Cortex	All-genes	232
neuronal stem cell	s11	0.074069	Cortex	All-genes	232
brain pericyte	s11	0.154119	Cortex	All-genes	232
Bergmann glial cell	s11	0.0406747	Cortex	All-genes	232
T cell	s11	0.0154149	Cortex	All-genes	232
mature NK T cell	s11	0.0012793	Cortex	All-genes	232
CD8-positive, alpha-beta T cell	s11	-0.0260748	Cortex	All-genes	232
ependymal cell	s11	-0.0383912	Cortex	All-genes	232
neuroepithelial cell	s11	-0.0629438	Cortex	All-genes	232
neuron	s12	1.27257	Cortex	All-genes	303
oligodendrocyte	s12	1.07029	Cortex	All-genes	303
interneuron	s12	0.83438	Cortex	All-genes	303
astrocyte	s12	0.889615	Cortex	All-genes	303
medium spiny neuron	s12	0.775749	Cortex	All-genes	303
endothelial cell	s12	0.605016	Cortex	All-genes	303
oligodendrocyte precursor cell	s12	0.296033	Cortex	All-genes	303
neuronal stem cell	s12	0.0588364	Cortex	All-genes	303
brain pericyte	s12	0.178511	Cortex	All-genes	303
Bergmann glial cell	s12	0.0416714	Cortex	All-genes	303
T cell	s12	0.0301517	Cortex	All-genes	303
mature NK T cell	s12	0.0090224	Cortex	All-genes	303
CD8-positive, alpha-beta T cell	s12	-0.0244634	Cortex	All-genes	303
ependymal cell	s12	-0.0200238	Cortex	All-genes	303
neuroepithelial cell	s12	-0.058223	Cortex	All-genes	303
neuron	s13	1.23731	Cortex	All-genes	649
oligodendrocyte	s13	1.09695	Cortex	All-genes	649
interneuron	s13	0.876314	Cortex	All-genes	649
astrocyte	s13	0.917544	Cortex	All-genes	649
medium spiny neuron	s13	0.770839	Cortex	All-genes	649
endothelial cell	s13	0.585556	Cortex	All-genes	649
oligodendrocyte precursor cell	s13	0.310297	Cortex	All-genes	649
neuronal stem cell	s13	0.0153094	Cortex	All-genes	649
brain pericyte	s13	0.192685	Cortex	All-genes	649
Bergmann glial cell	s13	0.0481173	Cortex	All-genes	649
T cell	s13	0.0435808	Cortex	All-genes	649
mature NK T cell	s13	0.000576195	Cortex	All-genes	649
CD8-positive, alpha-beta T cell	s13	-0.0228912	Cortex	All-genes	649
ependymal cell	s13	-0.0345081	Cortex	All-genes	649
neuroepithelial cell	s13	-0.0685935	Cortex	All-genes	649
neuron	s14	1.18993	Cortex	All-genes	654
oligodendrocyte	s14	1.13558	Cortex	All-genes	654
interneuron	s14	0.870781	Cortex	All-genes	654
astrocyte	s14	0.936248	Cortex	All-genes	654
medium spiny neuron	s14	0.828355	Cortex	All-genes	654
endothelial cell	s14	0.58915	Cortex	All-genes	654
oligodendrocyte precursor cell	s14	0.290378	Cortex	All-genes	654
neuronal stem cell	s14	-0.0165548	Cortex	All-genes	654
brain pericyte	s14	0.164197	Cortex	All-genes	654
Bergmann glial cell	s14	0.0231982	Cortex	All-genes	654
T cell	s14	0.0269389	Cortex	All-genes	654
mature NK T cell	s14	0.00428165	Cortex	All-genes	654
CD8-positive, alpha-beta T cell	s14	-0.0130863	Cortex	All-genes	654
ependymal cell	s14	-0.0228115	Cortex	All-genes	654
neuroepithelial cell	s14	-0.066787	Cortex	All-genes	654
neuron	s15	1.31029	Cortex	All-genes	904
oligodendrocyte	s15	1.17623	Cortex	All-genes	904
interneuron	s15	0.867443	Cortex	All-genes	904
astrocyte	s15	0.884033	Cortex	All-genes	904
medium spiny neuron	s15	0.699542	Cortex	All-genes	904
endothelial cell	s15	0.562782	Cortex	All-genes	904
oligodendrocyte precursor cell	s15	0.293349	Cortex	All-genes	904
neuronal stem cell	s15	-0.0356465	Cortex	All-genes	904
brain pericyte	s15	0.157258	Cortex	All-genes	904
Bergmann glial cell	s15	0.0371919	Cortex	All-genes	904
T cell	s15	0.0566527	Cortex	All-genes	904
mature NK T cell	s15	0.0169252	Cortex	All-genes	904
CD8-positive, alpha-beta T cell	s15	-0.0153815	Cortex	All-genes	904
ependymal cell	s15	-0.0387879	Cortex	All-genes	904
neuroepithelial cell	s15	-0.0671431	Cortex	All-genes	904
bronchial smooth muscle cell	s16	1.81763	Lung	All-genes	2
type II pneumocyte	s16	1.00097	Lung	All-genes	2
fibroblast of lung	s16	0.520611	Lung	All-genes	2
classical monocyte	s16	0.383663	Lung	All-genes	2
adventitial cell	s16	0.5264	Lung	All-genes	2
B cell	s16	0.113556	Lung	All-genes	2
club cell of bronchiole	s16	0.250132	Lung	All-genes	2
vein endothelial cell	s16	0.187302	Lung	All-genes	2
ciliated columnar cell of tracheobronchial tree	s16	0.107671	Lung	All-genes	2
pulmonary interstitial fibroblast	s16	0.335986	Lung	All-genes	2
myeloid dendritic cell	s16	0.164567	Lung	All-genes	2
pericyte cell	s16	0.232483	Lung	All-genes	2
smooth muscle cell of the pulmonary artery	s16	0.129136	Lung	All-genes	2
dendritic cell	s16	0.102188	Lung	All-genes	2
CD8-positive, alpha-beta T cell	s16	0.0569396	Lung	All-genes	2
non-classical monocyte	s16	0.0912317	Lung	All-genes	2
respiratory basal cell	s16	0.10851	Lung	All-genes	2
neutrophil	s16	0.0441406	Lung	All-genes	2
endothelial cell of lymphatic vessel	s16	0.103654	Lung	All-genes	2
NK cell	s16	0.0162655	Lung	All-genes	2
leukocyte	s16	0.0467004	Lung	All-genes	2
CD4-positive, alpha-beta T cell	s16	0.0422126	Lung	All-genes	2
T cell	s16	0.0370152	Lung	All-genes	2
regulatory T cell	s16	-0.0230992	Lung	All-genes	2
bronchial smooth muscle cell	s17	1.87203	Lung	All-genes	2
type II pneumocyte	s17	0.940691	Lung	All-genes	2
fibroblast of lung	s17	0.502389	Lung	All-genes	2
classical monocyte	s17	0.364549	Lung	All-genes	2
adventitial cell	s17	0.565557	Lung	All-genes	2
B cell	s17	0.120618	Lung	All-genes	2
club cell of bronchiole	s17	0.245833	Lung	All-genes	2
vein endothelial cell	s17	0.177556	Lung	All-genes	2
ciliated columnar cell of tracheobronchial tree	s17	0.120191	Lung	All-genes	2
pulmonary interstitial fibroblast	s17	0.372216	Lung	All-genes	2
myeloid dendritic cell	s17	0.162114	Lung	All-genes	2
pericyte cell	s17	0.241554	Lung	All-genes	2
smooth muscle cell of the pulmonary artery	s17	0.128664	Lung	All-genes	2
dendritic cell	s17	0.0850718	Lung	All-genes	2
CD8-positive, alpha-beta T cell	s17	0.0476773	Lung	All-genes	2
non-classical monocyte	s17	0.138931	Lung	All-genes	2
respiratory basal cell	s17	0.0969495	Lung	All-genes	2
neutrophil	s17	0.00914135	Lung	All-genes	2
endothelial cell of lymphatic vessel	s17	0.124397	Lung	All-genes	2
NK cell	s17	0.0149842	Lung	All-genes	2
leukocyte	s17	0.0152731	Lung	All-genes	2
CD4-positive, alpha-beta T cell	s17	0.0674376	Lung	All-genes	2
T cell	s17	0.0285481	Lung	All-genes	2
regulatory T cell	s17	-0.0292204	Lung	All-genes	2
bronchial smooth muscle cell	s18	1.91013	Lung	All-genes	5
type II pneumocyte	s18	0.83466	Lung	All-genes	5
fibroblast of lung	s18	0.504377	Lung	All-genes	5
classical monocyte	s18	0.294189	Lung	All-genes	5
adventitial cell	s18	0.488467	Lung	All-genes	5
B cell	s18	0.180242	Lung	All-genes	5
club cell of bronchiole	s18	0.226978	Lung	All-genes	5
vein endothelial cell	s18	0.179704	Lung	All-genes	5
ciliated columnar cell of tracheobronchial tree	s18	0.0732407	Lung	All-genes	5
pulmonary interstitial fibroblast	s18	0.448796	Lung	All-genes	5
myeloid dendritic cell	s18	0.174225	Lung	All-genes	5
pericyte cell	s18	0.274986	Lung	All-genes	5
smooth muscle cell of the pulmonary artery	s18	0.106694	Lung	All-genes	5
dendritic cell	s18	0.120165	Lung	All-genes	5
CD8-positive, alpha-beta T cell	s18	0.0753019	Lung	All-genes	5
non-classical monocyte	s18	0.0956542	Lung	All-genes	5
respiratory basal cell	s18	0.0666816	Lung	All-genes	5
neutrophil	s18	-0.0835622	Lung	All-genes	5
endothelial cell of lymphatic vessel	s18	0.102114	Lung	All-genes	5
NK cell	s18	0.0271987	Lung	All-genes	5
leukocyte	s18	0.0342032	Lung	All-genes	5
CD4-positive, alpha-beta T cell	s18	0.104739	Lung	All-genes	5
T cell	s18	0.0326422	Lung	All-genes	5
regulatory T cell	s18	-0.020373	Lung	All-genes	5
bronchial smooth muscle cell	s19	2.08258	Lung	All-genes	11
type II pneumocyte	s19	0.899445	Lung	All-genes	11
fibroblast of lung	s19	0.688114	Lung	All-genes	11
classical monocyte	s19	0.294246	Lung	All-genes	11
adventitial cell	s19	0.455811	Lung	All-genes	11
B cell	s19	0.179142	Lung	All-genes	11
club cell of bronchiole	s19	0.220189	Lung	All-genes	11
vein endothelial cell	s19	0.169185	Lung	All-genes	11
ciliated columnar cell of tracheobronchial tree	s19	0.0616473	Lung	All-genes	11
pulmonary interstitial fibroblast	s19	0.436754	Lung	All-genes	11
myeloid dendritic cell	s19	0.175233	Lung	All-genes	11
pericyte cell	s19	0.285967	Lung	All-genes	11
smooth muscle cell of the pulmonary artery	s19	0.0960414	Lung	All-genes	11
dendritic cell	s19	0.0798305	Lung	All-genes	11
CD8-positive, alpha-beta T cell	s19	0.0759124	Lung	All-genes	11
non-classical monocyte	s19	0.0822743	Lung	All-genes	11
respiratory basal cell	s19	0.0548228	Lung	All-genes	11
neutrophil	s19	-0.0229502	Lung	All-genes	11
endothelial cell of lymphatic vessel	s19	0.067613	Lung	All-genes	11
NK cell	s19	-0.00369309	Lung	All-genes	11
leukocyte	s19	0.0246826	Lung	All-genes	11
CD4-positive, alpha-beta T cell	s19	0.0599208	Lung	All-genes	11
T cell	s19	0.0303681	Lung	All-genes	11
regulatory T cell	s19	-0.0179331	Lung	All-genes	11
bronchial smooth muscle cell	s20	2.33588	Lung	All-genes	20
type II pneumocyte	s20	1.0253	Lung	All-genes	20
fibroblast of lung	s20	0.841916	Lung	All-genes	20
classical monocyte	s20	0.325385	Lung	All-genes	20
adventitial cell	s20	0.348129	Lung	All-genes	20
B cell	s20	0.210111	Lung	All-genes	20
club cell of bronchiole	s20	0.254133	Lung	All-genes	20
vein endothelial cell	s20	0.192567	Lung	All-genes	20
ciliated columnar cell of tracheobronchial tree	s20	0.120981	Lung	All-genes	20
pulmonary interstitial fibroblast	s20	0.135582	Lung	All-genes	20
myeloid dendritic cell	s20	0.181916	Lung	All-genes	20
pericyte cell	s20	0.217531	Lung	All-genes	20
smooth muscle cell of the pulmonary artery	s20	0.114988	Lung	All-genes	20
dendritic cell	s20	0.0789132	Lung	All-genes	20
CD8-positive, alpha-beta T cell	s20	0.0684492	Lung	All-genes	20
non-classical monocyte	s20	0.11266	Lung	All-genes	20
respiratory basal cell	s20	0.0521582	Lung	All-genes	20
neutrophil	s20	0.0429399	Lung	All-genes	20
endothelial cell of lymphatic vessel	s20	0.0416299	Lung	All-genes	20
NK cell	s20	0.00474329	Lung	All-genes	20
leukocyte	s20	0.0166401	Lung	All-genes	20
CD4-positive, alpha-beta T cell	s20	0.0272812	Lung	All-genes	20
T cell	s20	0.0181151	Lung	All-genes	20
regulatory T cell	s20	-0.0149335	Lung	All-genes	20
bronchial smooth muscle cell	s21	1.94801	Lung	All-genes	32
type II pneumocyte	s21	0.896004	Lung	All-genes	32
fibroblast of lung	s21	0.52381	Lung	All-genes	32
classical monocyte	s21	0.391124	Lung	All-genes	32
adventitial cell	s21	0.39529	Lung	All-genes	32
B cell	s21	0.317202	Lung	All-genes	32
club cell of bronchiole	s21	0.255706	Lung	All-genes	32
vein endothelial cell	s21	0.205575	Lung	All-genes	32
ciliated columnar cell of tracheobronchial tree	s21	0.162796	Lung	All-genes	32
pulmonary interstitial fibroblast	s21	0.163647	Lung	All-genes	32
myeloid dendritic cell	s21	0.123688	Lung	All-genes	32
pericyte cell	s21	0.131437	Lung	All-genes	32
smooth muscle cell of the pulmonary artery	s21	0.0931588	Lung	All-genes	32
dendritic cell	s21	0.171748	Lung	All-genes	32
CD8-positive, alpha-beta T cell	s21	0.118636	Lung	All-genes	32
non-classical monocyte	s21	0.0628078	Lung	All-genes	32
respiratory basal cell	s21	0.145275	Lung	All-genes	32
neutrophil	s21	0.133704	Lung	All-genes	32
endothelial cell of lymphatic vessel	s21	0.0237452	Lung	All-genes	32
NK cell	s21	0.037845	Lung	All-genes	32
leukocyte	s21	0.0230627	Lung	All-genes	32
CD4-positive, alpha-beta T cell	s21	0.12522	Lung	All-genes	32
T cell	s21	0.0326574	Lung	All-genes	32
regulatory T cell	s21	-0.0133574	Lung	All-genes	32
bronchial smooth muscle cell	s22	2.19658	Lung	All-genes	61
type II pneumocyte	s22	1.10535	Lung	All-genes	61
fibroblast of lung	s22	0.653164	Lung	All-genes	61
classical monocyte	s22	0.512799	Lung	All-genes	61
adventitial cell	s22	0.358998	Lung	All-genes	61
B cell	s22	0.0632299	Lung	All-genes	61
club cell of bronchiole	s22	0.292991	Lung	All-genes	61
vein endothelial cell	s22	0.254734	Lung	All-genes	61
ciliated columnar cell of tracheobronchial tree	s22	0.194872	Lung	All-genes	61
pulmonary interstitial fibroblast	s22	0.10276	Lung	All-genes	61
myeloid dendritic cell	s22	0.134841	Lung	All-genes	61
pericyte cell	s22	0.153195	Lung	All-genes	61
smooth muscle cell of the pulmonary artery	s22	0.127099	Lung	All-genes	61
dendritic cell	s22	0.0736966	Lung	All-genes	61
CD8-positive, alpha-beta T cell	s22	0.0659449	Lung	All-genes	61
non-classical monocyte	s22	0.0636076	Lung	All-genes	61
respiratory basal cell	s22	0.0887891	Lung	All-genes	61
neutrophil	s22	0.300685	Lung	All-genes	61
endothelial cell of lymphatic vessel	s22	0.0332205	Lung	All-genes	61
NK cell	s22	-0.000675047	Lung	All-genes	61
leukocyte	s22	0.0131629	Lung	All-genes	61
CD4-positive, alpha-beta T cell	s22	-0.0324946	Lung	All-genes	61
T cell	s22	0.019832	Lung	All-genes	61
regulatory T cell	s22	-0.0223467	Lung	All-genes	61
bronchial smooth muscle cell	s23	2.06349	Lung	All-genes	93
type II pneumocyte	s23	1.02176	Lung	All-genes	93
fibroblast of lung	s23	0.596956	Lung	All-genes	93
classical monocyte	s23	0.396272	Lung	All-genes	93
adventitial cell	s23	0.328677	Lung	All-genes	93
B cell	s23	0.192721	Lung	All-genes	93
club cell of bronchiole	s23	0.246978	Lung	All-genes	93
vein endothelial cell	s23	0.247984	Lung	All-genes	93
ciliated columnar cell of tracheobronchial tree	s23	0.286661	Lung	All-genes	93
pulmonary interstitial fibroblast	s23	0.120066	Lung	All-genes	93
myeloid dendritic cell	s23	0.180788	Lung	All-genes	93
pericyte cell	s23	0.134152	Lung	All-genes	93
smooth muscle cell of the pulmonary artery	s23	0.116225	Lung	All-genes	93
dendritic cell	s23	0.0950376	Lung	All-genes	93
CD8-positive, alpha-beta T cell	s23	0.104529	Lung	All-genes	93
non-classical monocyte	s23	0.0561827	Lung	All-genes	93
respiratory basal cell	s23	0.119211	Lung	All-genes	93
neutrophil	s23	0.0587001	Lung	All-genes	93
endothelial cell of lymphatic vessel	s23	0.0245573	Lung	All-genes	93
NK cell	s23	0.0434939	Lung	All-genes	93
leukocyte	s23	0.0330571	Lung	All-genes	93
CD4-positive, alpha-beta T cell	s23	0.0114405	Lung	All-genes	93
T cell	s23	0.029297	Lung	All-genes	93
regulatory T cell	s23	-0.00731409	Lung	All-genes	93
bronchial smooth muscle cell	s24	2.42845	Lung	All-genes	93
type II pneumocyte	s24	1.12876	Lung	All-genes	93
fibroblast of lung	s24	0.72761	Lung	All-genes	93
classical monocyte	s24	0.328342	Lung	All-genes	93
adventitial cell	s24	0.359415	Lung	All-genes	93
B cell	s24	0.155978	Lung	All-genes	93
club cell of bronchiole	s24	0.278552	Lung	All-genes	93
vein endothelial cell	s24	0.219817	Lung	All-genes	93
ciliated columnar cell of tracheobronchial tree	s24	0.177827	Lung	All-genes	93
pulmonary interstitial fibroblast	s24	0.0853482	Lung	All-genes	93
myeloid dendritic cell	s24	0.184661	Lung	All-genes	93
pericyte cell	s24	0.163343	Lung	All-genes	93
smooth muscle cell of the pulmonary artery	s24	0.143799	Lung	All-genes	93
dendritic cell	s24	0.0492053	Lung	All-genes	93
CD8-positive, alpha-beta T cell	s24	0.0600415	Lung	All-genes	93
non-classical monocyte	s24	0.133463	Lung	All-genes	93
respiratory basal cell	s24	0.0468926	Lung	All-genes	93
neutrophil	s24	0.0606645	Lung	All-genes	93
endothelial cell of lymphatic vessel	s24	0.0460306	Lung	All-genes	93
NK cell	s24	0.0117829	Lung	All-genes	93
leukocyte	s24	-0.00973364	Lung	All-genes	93
CD4-positive, alpha-beta T cell	s24	-0.0120294	Lung	All-genes	93
T cell	s24	0.0167197	Lung	All-genes	93
regulatory T cell	s24	-0.0182981	Lung	All-genes	93
bronchial smooth muscle cell	s25	2.23668	Lung	All-genes	144
type II pneumocyte	s25	0.982438	Lung	All-genes	144
fibroblast of lung	s25	0.657647	Lung	All-genes	144
classical monocyte	s25	0.376554	Lung	All-genes	144
adventitial cell	s25	0.32291	Lung	All-genes	144
B cell	s25	0.205537	Lung	All-genes	144
club cell of bronchiole	s25	0.280066	Lung	All-genes	144
vein endothelial cell	s25	0.247244	Lung	All-genes	144
ciliated columnar cell of tracheobronchial tree	s25	0.252211	Lung	All-genes	144
pulmonary interstitial fibroblast	s25	0.105477	Lung	All-genes	144
myeloid dendritic cell	s25	0.174592	Lung	All-genes	144
pericyte cell	s25	0.142619	Lung	All-genes	144
smooth muscle cell of the pulmonary artery	s25	0.109158	Lung	All-genes	144
dendritic cell	s25	0.0777753	Lung	All-genes	144
CD8-positive, alpha-beta T cell	s25	0.0829286	Lung	All-genes	144
non-classical monocyte	s25	0.127587	Lung	All-genes	144
respiratory basal cell	s25	0.0917125	Lung	All-genes	144
neutrophil	s25	0.0726665	Lung	All-genes	144
endothelial cell of lymphatic vessel	s25	0.0256096	Lung	All-genes	144
NK cell	s25	0.0653177	Lung	All-genes	144
leukocyte	s25	0.0145247	Lung	All-genes	144
CD4-positive, alpha-beta T cell	s25	0.0327982	Lung	All-genes	144
T cell	s25	0.0183293	Lung	All-genes	144
regulatory T cell	s25	-0.0115836	Lung	All-genes	144
bronchial smooth muscle cell	s26	2.14942	Lung	All-genes	232
type II pneumocyte	s26	1.04598	Lung	All-genes	232
fibroblast of lung	s26	0.691362	Lung	All-genes	232
classical monocyte	s26	0.379653	Lung	All-genes	232
adventitial cell	s26	0.362192	Lung	All-genes	232
B cell	s26	0.242693	Lung	All-genes	232
club cell of bronchiole	s26	0.278253	Lung	All-genes	232
vein endothelial cell	s26	0.240766	Lung	All-genes	232
ciliated columnar cell of tracheobronchial tree	s26	0.232261	Lung	All-genes	232
pulmonary interstitial fibroblast	s26	0.11053	Lung	All-genes	232
myeloid dendritic cell	s26	0.174167	Lung	All-genes	232
pericyte cell	s26	0.136086	Lung	All-genes	232
smooth muscle cell of the pulmonary artery	s26	0.123129	Lung	All-genes	232
dendritic cell	s26	0.0837699	Lung	All-genes	232
CD8-positive, alpha-beta T cell	s26	0.0871717	Lung	All-genes	232
non-classical monocyte	s26	0.0816093	Lung	All-genes	232
respiratory basal cell	s26	0.061549	Lung	All-genes	232
neutrophil	s26	0.0997346	Lung	All-genes	232
endothelial cell of lymphatic vessel	s26	0.0284952	Lung	All-genes	232
NK cell	s26	0.039012	Lung	All-genes	232
leukocyte	s26	0.0182231	Lung	All-genes	232
CD4-positive, alpha-beta T cell	s26	0.0176615	Lung	All-genes	232
T cell	s26	0.0213529	Lung	All-genes	232
regulatory T cell	s26	-0.0093611	Lung	All-genes	232
bronchial smooth muscle cell	s27	1.96736	Lung	All-genes	303
type II pneumocyte	s27	0.950514	Lung	All-genes	303
fibroblast of lung	s27	0.50515	Lung	All-genes	303
classical monocyte	s27	0.47877	Lung	All-genes	303
adventitial cell	s27	0.407895	Lung	All-genes	303
B cell	s27	0.0629397	Lung	All-genes	303
club cell of bronchiole	s27	0.251836	Lung	All-genes	303
vein endothelial cell	s27	0.299256	Lung	All-genes	303
ciliated columnar cell of tracheobronchial tree	s27	0.283116	Lung	All-genes	303
pulmonary interstitial fibroblast	s27	0.138582	Lung	All-genes	303
myeloid dendritic cell	s27	0.147797	Lung	All-genes	303
pericyte cell	s27	0.112674	Lung	All-genes	303
smooth muscle cell of the pulmonary artery	s27	0.122518	Lung	All-genes	303
dendritic cell	s27	0.0902311	Lung	All-genes	303
CD8-positive, alpha-beta T cell	s27	0.0943985	Lung	All-genes	303
non-classical monocyte	s27	-0.00830527	Lung	All-genes	303
respiratory basal cell	s27	0.117221	Lung	All-genes	303
neutrophil	s27	0.219955	Lung	All-genes	303
endothelial cell of lymphatic vessel	s27	0.0316985	Lung	All-genes	303
NK cell	s27	-0.00647903	Lung	All-genes	303
leukocyte	s27	0.0724329	Lung	All-genes	303
CD4-positive, alpha-beta T cell	s27	-0.0185306	Lung	All-genes	303
T cell	s27	0.0433325	Lung	All-genes	303
regulatory T cell	s27	-0.00798037	Lung	All-genes	303
bronchial smooth muscle cell	s28	2.01507	Lung	All-genes	649
type II pneumocyte	s28	0.934151	Lung	All-genes	649
fibroblast of lung	s28	0.558356	Lung	All-genes	649
classical monocyte	s28	0.444492	Lung	All-genes	649
adventitial cell	s28	0.332986	Lung	All-genes	649
B cell	s28	0.255945	Lung	All-genes	649
club cell of bronchiole	s28	0.251332	Lung	All-genes	649
vein endothelial cell	s28	0.262375	Lung	All-genes	649
ciliated columnar cell of tracheobronchial tree	s28	0.300954	Lung	All-genes	649
pulmonary interstitial fibroblast	s28	0.121556	Lung	All-genes	649
myeloid dendritic cell	s28	0.16732	Lung	All-genes	649
pericyte cell	s28	0.111861	Lung	All-genes	649
smooth muscle cell of the pulmonary artery	s28	0.113359	Lung	All-genes	649
dendritic cell	s28	0.0860154	Lung	All-genes	649
CD8-positive, alpha-beta T cell	s28	0.103078	Lung	All-genes	649
non-classical monocyte	s28	0.0854419	Lung	All-genes	649
respiratory basal cell	s28	0.0961698	Lung	All-genes	649
neutrophil	s28	0.0766436	Lung	All-genes	649
endothelial cell of lymphatic vessel	s28	0.0190367	Lung	All-genes	649
NK cell	s28	0.0367449	Lung	All-genes	649
leukocyte	s28	0.0501605	Lung	All-genes	649
CD4-positive, alpha-beta T cell	s28	-0.00353706	Lung	All-genes	649
T cell	s28	0.0267665	Lung	All-genes	649
regulatory T cell	s28	-0.00600296	Lung	All-genes	649
bronchial smooth muscle cell	s29	1.31488	Lung	All-genes	654
type II pneumocyte	s29	0.685314	Lung	All-genes	654
fibroblast of lung	s29	0.309196	Lung	All-genes	654
classical monocyte	s29	0.670787	Lung	All-genes	654
adventitial cell	s29	0.712068	Lung	All-genes	654
B cell	s29	0.543403	Lung	All-genes	654
club cell of bronchiole	s29	0.268143	Lung	All-genes	654
vein endothelial cell	s29	0.218353	Lung	All-genes	654
ciliated columnar cell of tracheobronchial tree	s29	0.150572	Lung	All-genes	654
pulmonary interstitial fibroblast	s29	0.152665	Lung	All-genes	654
myeloid dendritic cell	s29	0.186166	Lung	All-genes	654
pericyte cell	s29	0.0149907	Lung	All-genes	654
smooth muscle cell of the pulmonary artery	s29	0.105128	Lung	All-genes	654
dendritic cell	s29	0.15715	Lung	All-genes	654
CD8-positive, alpha-beta T cell	s29	0.142715	Lung	All-genes	654
non-classical monocyte	s29	0.0731333	Lung	All-genes	654
respiratory basal cell	s29	0.0780047	Lung	All-genes	654
neutrophil	s29	0.0390707	Lung	All-genes	654
endothelial cell of lymphatic vessel	s29	0.0812861	Lung	All-genes	654
NK cell	s29	0.0818634	Lung	All-genes	654
leukocyte	s29	0.0655033	Lung	All-genes	654
CD4-positive, alpha-beta T cell	s29	0.0315646	Lung	All-genes	654
T cell	s29	0.0177538	Lung	All-genes	654
regulatory T cell	s29	-0.0105248	Lung	All-genes	654
bronchial smooth muscle cell	s30	1.42241	Lung	All-genes	904
type II pneumocyte	s30	0.700465	Lung	All-genes	904
fibroblast of lung	s30	0.255122	Lung	All-genes	904
classical monocyte	s30	0.814458	Lung	All-genes	904
adventitial cell	s30	0.32179	Lung	All-genes	904
B cell	s30	0.934932	Lung	All-genes	904
club cell of bronchiole	s30	0.22055	Lung	All-genes	904
vein endothelial cell	s30	0.256049	Lung	All-genes	904
ciliated columnar cell of tracheobronchial tree	s30	0.14447	Lung	All-genes	904
pulmonary interstitial fibroblast	s30	-0.0152707	Lung	All-genes	904
myeloid dendritic cell	s30	0.23024	Lung	All-genes	904
pericyte cell	s30	0.00281162	Lung	All-genes	904
smooth muscle cell of the pulmonary artery	s30	0.0698914	Lung	All-genes	904
dendritic cell	s30	0.231566	Lung	All-genes	904
CD8-positive, alpha-beta T cell	s30	0.167301	Lung	All-genes	904
non-classical monocyte	s30	0.109379	Lung	All-genes	904
respiratory basal cell	s30	0.0501997	Lung	All-genes	904
neutrophil	s30	0.0138165	Lung	All-genes	904
endothelial cell of lymphatic vessel	s30	0.0392445	Lung	All-genes	904
NK cell	s30	0.205324	Lung	All-genes	904
leukocyte	s30	0.0166022	Lung	All-genes	904
CD4-positive, alpha-beta T cell	s30	0.0497083	Lung	All-genes	904
T cell	s30	0.00698537	Lung	All-genes	904
regulatory T cell	s30	-0.00101492	Lung	All-genes	904
bronchial smooth muscle cell	s31	1.74701	Lung	All-genes	904
type II pneumocyte	s31	0.841963	Lung	All-genes	904
fibroblast of lung	s31	0.416021	Lung	All-genes	904
classical monocyte	s31	0.607163	Lung	All-genes	904
adventitial cell	s31	0.382515	Lung	All-genes	904
B cell	s31	0.308763	Lung	All-genes	904
club cell of bronchiole	s31	0.259002	Lung	All-genes	904
vein endothelial cell	s31	0.296092	Lung	All-genes	904
ciliated columnar cell of tracheobronchial tree	s31	0.245026	Lung	All-genes	904
pulmonary interstitial fibroblast	s31	0.0936887	Lung	All-genes	904
myeloid dendritic cell	s31	0.152015	Lung	All-genes	904
pericyte cell	s31	0.0478826	Lung	All-genes	904
smooth muscle cell of the pulmonary artery	s31	0.0903692	Lung	All-genes	904
dendritic cell	s31	0.159962	Lung	All-genes	904
CD8-positive, alpha-beta T cell	s31	0.145533	Lung	All-genes	904
non-classical monocyte	s31	0.0746454	Lung	All-genes	904
respiratory basal cell	s31	0.0971115	Lung	All-genes	904
neutrophil	s31	0.0836338	Lung	All-genes	904
endothelial cell of lymphatic vessel	s31	0.0108705	Lung	All-genes	904
NK cell	s31	0.074115	Lung	All-genes	904
leukocyte	s31	0.0685959	Lung	All-genes	904
CD4-positive, alpha-beta T cell	s31	-0.0374219	Lung	All-genes	904
T cell	s31	0.0310985	Lung	All-genes	904
regulatory T cell	s31	-0.000772624	Lung	All-genes	904
hepatocyte	s32	3.0075	Liver	All-genes	2
endothelial cell of hepatic sinusoid	s32	0.770524	Liver	All-genes	2
Kupffer cell	s32	0.755205	Liver	All-genes	2
myeloid leukocyte	s32	0.417652	Liver	All-genes	2
B cell	s32	0.275437	Liver	All-genes	2
mature NK T cell	s32	0.219786	Liver	All-genes	2
NK cell	s32	0.115376	Liver	All-genes	2
T cell	s32	0.180158	Liver	All-genes	2
CD4-positive, alpha-beta T cell	s32	0.0383344	Liver	All-genes	2
neutrophil	s32	0.088189	Liver	All-genes	2
hepatocyte	s33	3.06799	Liver	All-genes	2
endothelial cell of hepatic sinusoid	s33	0.812109	Liver	All-genes	2
Kupffer cell	s33	0.748583	Liver	All-genes	2
myeloid leukocyte	s33	0.410377	Liver	All-genes	2
B cell	s33	0.293769	Liver	All-genes	2
mature NK T cell	s33	0.224185	Liver	All-genes	2
NK cell	s33	0.11807	Liver	All-genes	2
T cell	s33	0.171363	Liver	All-genes	2
CD4-positive, alpha-beta T cell	s33	0.0388698	Liver	All-genes	2
neutrophil	s33	0.0802646	Liver	All-genes	2
hepatocyte	s34	3.11393	Liver	All-genes	5
endothelial cell of hepatic sinusoid	s34	0.854047	Liver	All-genes	5
Kupffer cell	s34	0.805507	Liver	All-genes	5
myeloid leukocyte	s34	0.347199	Liver	All-genes	5
B cell	s34	0.235614	Liver	All-genes	5
mature NK T cell	s34	0.209135	Liver	All-genes	5
NK cell	s34	0.105571	Liver	All-genes	5
T cell	s34	0.152988	Liver	All-genes	5
CD4-positive, alpha-beta T cell	s34	0.0258749	Liver	All-genes	5
neutrophil	s34	0.0739494	Liver	All-genes	5
hepatocyte	s35	3.49976	Liver	All-genes	11
endothelial cell of hepatic sinusoid	s35	0.998178	Liver	All-genes	11
Kupffer cell	s35	0.663887	Liver	All-genes	11
myeloid leukocyte	s35	0.244638	Liver	All-genes	11
B cell	s35	0.209513	Liver	All-genes	11
mature NK T cell	s35	0.170044	Liver	All-genes	11
NK cell	s35	0.0874749	Liver	All-genes	11
T cell	s35	0.0901479	Liver	All-genes	11
CD4-positive, alpha-beta T cell	s35	0.0165659	Liver	All-genes	11
neutrophil	s35	-0.001908	Liver	All-genes	11
hepatocyte	s36	3.75896	Liver	All-genes	20
endothelial cell of hepatic sinusoid	s36	0.940118	Liver	All-genes	20
Kupffer cell	s36	0.659561	Liver	All-genes	20
myeloid leukocyte	s36	0.211343	Liver	All-genes	20
B cell	s36	0.154068	Liver	All-genes	20
mature NK T cell	s36	0.168471	Liver	All-genes	20
NK cell	s36	0.0992874	Liver	All-genes	20
T cell	s36	0.063651	Liver	All-genes	20
CD4-positive, alpha-beta T cell	s36	0.0184163	Liver	All-genes	20
neutrophil	s36	-0.0299755	Liver	All-genes	20
hepatocyte	s37	3.86849	Liver	All-genes	32
endothelial cell of hepatic sinusoid	s37	0.829007	Liver	All-genes	32
Kupffer cell	s37	0.572608	Liver	All-genes	32
myeloid leukocyte	s37	0.230737	Liver	All-genes	32
B cell	s37	0.150358	Liver	All-genes	32
mature NK T cell	s37	0.176434	Liver	All-genes	32
NK cell	s37	0.0926626	Liver	All-genes	32
T cell	s37	0.030457	Liver	All-genes	32
CD4-positive, alpha-beta T cell	s37	0.0172204	Liver	All-genes	32
neutrophil	s37	-0.00932276	Liver	All-genes	32
hepatocyte	s38	3.80371	Liver	All-genes	61
endothelial cell of hepatic sinusoid	s38	0.925698	Liver	All-genes	61
Kupffer cell	s38	0.559472	Liver	All-genes	61
myeloid leukocyte	s38	0.240136	Liver	All-genes	61
B cell	s38	0.163707	Liver	All-genes	61
mature NK T cell	s38	0.194993	Liver	All-genes	61
NK cell	s38	0.0954921	Liver	All-genes	61
T cell	s38	0.00988847	Liver	All-genes	61
CD4-positive, alpha-beta T cell	s38	0.0218659	Liver	All-genes	61
neutrophil	s38	0.0207424	Liver	All-genes	61
hepatocyte	s39	3.86868	Liver	All-genes	93
endothelial cell of hepatic sinusoid	s39	0.909499	Liver	All-genes	93
Kupffer cell	s39	0.568222	Liver	All-genes	93
myeloid leukocyte	s39	0.19821	Liver	All-genes	93
B cell	s39	0.167514	Liver	All-genes	93
mature NK T cell	s39	0.169822	Liver	All-genes	93
NK cell	s39	0.083004	Liver	All-genes	93
T cell	s39	0.00359315	Liver	All-genes	93
CD4-positive, alpha-beta T cell	s39	0.0149163	Liver	All-genes	93
neutrophil	s39	-0.0157463	Liver	All-genes	93
hepatocyte	s40	3.96988	Liver	All-genes	93
endothelial cell of hepatic sinusoid	s40	0.906266	Liver	All-genes	93
Kupffer cell	s40	0.416852	Liver	All-genes	93
myeloid leukocyte	s40	0.217858	Liver	All-genes	93
B cell	s40	0.18272	Liver	All-genes	93
mature NK T cell	s40	0.167265	Liver	All-genes	93
NK cell	s40	0.0903314	Liver	All-genes	93
T cell	s40	0.00545397	Liver	All-genes	93
CD4-positive, alpha-beta T cell	s40	0.0220133	Liver	All-genes	93
neutrophil	s40	-0.0461631	Liver	All-genes	93
hepatocyte	s41	3.96134	Liver	All-genes	144
endothelial cell of hepatic sinusoid	s41	0.839692	Liver	All-genes	144
Kupffer cell	s41	0.558431	Liver	All-genes	144
myeloid leukocyte	s41	0.201012	Liver	All-genes	144
B cell	s41	0.175322	Liver	All-genes	144
mature NK T cell	s41	0.16253	Liver	All-genes	144
NK cell	s41	0.0864654	Liver	All-genes	144
T cell	s41	-0.00168437	Liver	All-genes	144
CD4-positive, alpha-beta T cell	s41	0.0204006	Liver	All-genes	144
neutrophil	s41	-0.0313666	Liver	All-genes	144
hepatocyte	s42	3.94402	Liver	All-genes	232
endothelial cell of hepatic sinusoid	s42	0.848064	Liver	All-genes	232
Kupffer cell	s42	0.53238	Liver	All-genes	232
myeloid leukocyte	s42	0.224596	Liver	All-genes	232
B cell	s42	0.174014	Liver	All-genes	232
mature NK T cell	s42	0.158353	Liver	All-genes	232
NK cell	s42	0.0854678	Liver	All-genes	232
T cell	s42	0.00140095	Liver	All-genes	232
CD4-positive, alpha-beta T cell	s42	0.0184716	Liver	All-genes	232
neutrophil	s42	-0.029594	Liver	All-genes	232
hepatocyte	s43	3.92522	Liver	All-genes	303
endothelial cell of hepatic sinusoid	s43	0.897503	Liver	All-genes	303
Kupffer cell	s43	0.462473	Liver	All-genes	303
myeloid leukocyte	s43	0.216126	Liver	All-genes	303
B cell	s43	0.171639	Liver	All-genes	303
mature NK T cell	s43	0.171295	Liver	All-genes	303
NK cell	s43	0.0844043	Liver	All-genes	303
T cell	s43	0.000738028	Liver	All-genes	303
CD4-positive, alpha-beta T cell	s43	0.0243498	Liver	All-genes	303
neutrophil	s43	0.00502373	Liver	All-genes	303
hepatocyte	s44	3.92586	Liver	All-genes	649
endothelial cell of hepatic sinusoid	s44	0.776821	Liver	All-genes	649
Kupffer cell	s44	0.463428	Liver	All-genes	649
myeloid leukocyte	s44	0.210011	Liver	All-genes	649
B cell	s44	0.219939	Liver	All-genes	649
mature NK T cell	s44	0.158727	Liver	All-genes	649
NK cell	s44	0.101798	Liver	All-genes	649
T cell	s44	0.0121947	Liver	All-genes	649
CD4-positive, alpha-beta T cell	s44	0.0138544	Liver	All-genes	649
neutrophil	s44	-0.0349908	Liver	All-genes	649
hepatocyte	s45	3.78489	Liver	All-genes	654
endothelial cell of hepatic sinusoid	s45	0.719599	Liver	All-genes	654
Kupffer cell	s45	0.654482	Liver	All-genes	654
myeloid leukocyte	s45	0.186393	Liver	All-genes	654
B cell	s45	0.210171	Liver	All-genes	654
mature NK T cell	s45	0.17153	Liver	All-genes	654
NK cell	s45	0.0895437	Liver	All-genes	654
T cell	s45	0.019148	Liver	All-genes	654
CD4-positive, alpha-beta T cell	s45	0.0138508	Liver	All-genes	654
neutrophil	s45	0.000106084	Liver	All-genes	654
hepatocyte	s46	3.69183	Liver	All-genes	904
endothelial cell of hepatic sinusoid	s46	0.712829	Liver	All-genes	904
Kupffer cell	s46	0.855769	Liver	All-genes	904
myeloid leukocyte	s46	0.215623	Liver	All-genes	904
B cell	s46	0.258137	Liver	All-genes	904
mature NK T cell	s46	0.169526	Liver	All-genes	904
NK cell	s46	0.0904238	Liver	All-genes	904
T cell	s46	0.0177699	Liver	All-genes	904
CD4-positive, alpha-beta T cell	s46	0.0103526	Liver	All-genes	904
neutrophil	s46	0.020011	Liver	All-genes	904
hepatocyte	s47	3.74897	Liver	All-genes	904
endothelial cell of hepatic sinusoid	s47	0.786998	Liver	All-genes	904
Kupffer cell	s47	0.735236	Liver	All-genes	904
myeloid leukocyte	s47	0.205552	Liver	All-genes	904
B cell	s47	0.201042	Liver	All-genes	904
mature NK T cell	s47	0.165284	Liver	All-genes	904
NK cell	s47	0.0838616	Liver	All-genes	904
T cell	s47	0.0163925	Liver	All-genes	904
CD4-positive, alpha-beta T cell	s47	0.0133107	Liver	All-genes	904
neutrophil	s47	0.028652	Liver	All-genes	904
skeletal muscle satellite cell	s48	1.57552	Muscle	All-genes	2
mesenchymal stem cell	s48	1.6503	Muscle	All-genes	2
endothelial cell	s48	0.351894	Muscle	All-genes	2
macrophage	s48	0.432092	Muscle	All-genes	2
B cell	s48	0.239859	Muscle	All-genes	2
T cell	s48	0.137117	Muscle	All-genes	2
skeletal muscle satellite cell	s49	1.56716	Muscle	All-genes	2
mesenchymal stem cell	s49	1.66132	Muscle	All-genes	2
endothelial cell	s49	0.324407	Muscle	All-genes	2
macrophage	s49	0.422999	Muscle	All-genes	2
B cell	s49	0.250668	Muscle	All-genes	2
T cell	s49	0.137163	Muscle	All-genes	2
skeletal muscle satellite cell	s50	1.56146	Muscle	All-genes	5
mesenchymal stem cell	s50	1.52208	Muscle	All-genes	5
endothelial cell	s50	0.391565	Muscle	All-genes	5
macrophage	s50	0.413239	Muscle	All-genes	5
B cell	s50	0.273929	Muscle	All-genes	5
T cell	s50	0.131441	Muscle	All-genes	5
skeletal muscle satellite cell	s51	1.33473	Muscle	All-genes	11
mesenchymal stem cell	s51	1.93201	Muscle	All-genes	11
endothelial cell	s51	0.346428	Muscle	All-genes	11
macrophage	s51	0.561137	Muscle	All-genes	11
B cell	s51	0.315155	Muscle	All-genes	11
T cell	s51	0.160934	Muscle	All-genes	11
skeletal muscle satellite cell	s52	1.05766	Muscle	All-genes	20
mesenchymal stem cell	s52	1.38532	Muscle	All-genes	20
endothelial cell	s52	0.273528	Muscle	All-genes	20
macrophage	s52	0.686204	Muscle	All-genes	20
B cell	s52	0.579422	Muscle	All-genes	20
T cell	s52	0.177845	Muscle	All-genes	20
skeletal muscle satellite cell	s53	1.68681	Muscle	All-genes	32
mesenchymal stem cell	s53	1.22792	Muscle	All-genes	32
endothelial cell	s53	0.641053	Muscle	All-genes	32
macrophage	s53	0.355211	Muscle	All-genes	32
B cell	s53	0.202331	Muscle	All-genes	32
T cell	s53	0.0461334	Muscle	All-genes	32
skeletal muscle satellite cell	s54	2.10605	Muscle	All-genes	61
mesenchymal stem cell	s54	0.88279	Muscle	All-genes	61
endothelial cell	s54	0.43437	Muscle	All-genes	61
macrophage	s54	0.232913	Muscle	All-genes	61
B cell	s54	0.230149	Muscle	All-genes	61
T cell	s54	0.0450992	Muscle	All-genes	61
skeletal muscle satellite cell	s55	1.77917	Muscle	All-genes	93
mesenchymal stem cell	s55	1.18015	Muscle	All-genes	93
endothelial cell	s55	0.320551	Muscle	All-genes	93
macrophage	s55	0.360626	Muscle	All-genes	93
B cell	s55	0.342344	Muscle	All-genes	93
T cell	s55	0.0686279	Muscle	All-genes	93
skeletal muscle satellite cell	s56	1.99448	Muscle	All-genes	93
mesenchymal stem cell	s56	0.854335	Muscle	All-genes	93
endothelial cell	s56	0.480928	Muscle	All-genes	93
macrophage	s56	0.209427	Muscle	All-genes	93
B cell	s56	0.271522	Muscle	All-genes	93
T cell	s56	0.0715726	Muscle	All-genes	93
skeletal muscle satellite cell	s57	1.73165	Muscle	All-genes	144
mesenchymal stem cell	s57	1.31132	Muscle	All-genes	144
endothelial cell	s57	0.402935	Muscle	All-genes	144
macrophage	s57	0.402191	Muscle	All-genes	144
B cell	s57	0.276333	Muscle	All-genes	144
T cell	s57	0.0538921	Muscle	All-genes	144
skeletal muscle satellite cell	s58	1.83475	Muscle	All-genes	232
mesenchymal stem cell	s58	1.17031	Muscle	All-genes	232
endothelial cell	s58	0.363164	Muscle	All-genes	232
macrophage	s58	0.385845	Muscle	All-genes	232
B cell	s58	0.280366	Muscle	All-genes	232
T cell	s58	0.0428858	Muscle	All-genes	232
skeletal muscle satellite cell	s59	1.92045	Muscle	All-genes	303
mesenchymal stem cell	s59	0.8269	Muscle	All-genes	303
endothelial cell	s59	0.605997	Muscle	All-genes	303
macrophage	s59	0.269774	Muscle	All-genes	303
B cell	s59	0.234726	Muscle	All-genes	303
T cell	s59	0.026914	Muscle	All-genes	303
skeletal muscle satellite cell	s60	1.93641	Muscle	All-genes	649
mesenchymal stem cell	s60	0.800862	Muscle	All-genes	649
endothelial cell	s60	0.602018	Muscle	All-genes	649
macrophage	s60	0.16931	Muscle	All-genes	649
B cell	s60	0.292457	Muscle	All-genes	649
T cell	s60	0.0917639	Muscle	All-genes	649
skeletal muscle satellite cell	s61	1.97123	Muscle	All-genes	654
mesenchymal stem cell	s61	0.720352	Muscle	All-genes	654
endothelial cell	s61	0.605256	Muscle	All-genes	654
macrophage	s61	0.16836	Muscle	All-genes	654
B cell	s61	0.322241	Muscle	All-genes	654
T cell	s61	0.0693151	Muscle	All-genes	654
skeletal muscle satellite cell	s62	1.61669	Muscle	All-genes	904
mesenchymal stem cell	s62	1.09307	Muscle	All-genes	904
endothelial cell	s62	0.286825	Muscle	All-genes	904
macrophage	s62	0.4376	Muscle	All-genes	904
B cell	s62	0.629064	Muscle	All-genes	904
T cell	s62	0.0950627	Muscle	All-genes	904
skeletal muscle satellite cell	s63	1.66455	Muscle	All-genes	904
mesenchymal stem cell	s63	1.03135	Muscle	All-genes	904
endothelial cell	s63	0.556608	Muscle	All-genes	904
macrophage	s63	0.342034	Muscle	All-genes	904
B cell	s63	0.356546	Muscle	All-genes	904
T cell	s63	0.046058	Muscle	All-genes	904
neuron	s1	1.12297	Cortex	DiCo	2
medium spiny neuron	s1	0.523211	Cortex	DiCo	2
oligodendrocyte	s1	0.438872	Cortex	DiCo	2
astrocyte	s1	0.323442	Cortex	DiCo	2
endothelial cell	s1	0.722479	Cortex	DiCo	2
interneuron	s1	0.317913	Cortex	DiCo	2
oligodendrocyte precursor cell	s1	0.494305	Cortex	DiCo	2
neuronal stem cell	s1	1.0318	Cortex	DiCo	2
brain pericyte	s1	0.24052	Cortex	DiCo	2
Bergmann glial cell	s1	-0.041085	Cortex	DiCo	2
CD8-positive, alpha-beta T cell	s1	0.0156055	Cortex	DiCo	2
mature NK T cell	s1	0.024989	Cortex	DiCo	2
ependymal cell	s1	-0.0240175	Cortex	DiCo	2
T cell	s1	-0.0221298	Cortex	DiCo	2
neuroepithelial cell	s1	-0.0132314	Cortex	DiCo	2
neuron	s2	1.0662	Cortex	DiCo	2
medium spiny neuron	s2	0.504805	Cortex	DiCo	2
oligodendrocyte	s2	0.393098	Cortex	DiCo	2
astrocyte	s2	0.323213	Cortex	DiCo	2
endothelial cell	s2	0.785427	Cortex	DiCo	2
interneuron	s2	0.422751	Cortex	DiCo	2
oligodendrocyte precursor cell	s2	0.461872	Cortex	DiCo	2
neuronal stem cell	s2	0.938576	Cortex	DiCo	2
brain pericyte	s2	0.315396	Cortex	DiCo	2
Bergmann glial cell	s2	-0.0397758	Cortex	DiCo	2
CD8-positive, alpha-beta T cell	s2	0.00823516	Cortex	DiCo	2
mature NK T cell	s2	0.00751006	Cortex	DiCo	2
ependymal cell	s2	-0.0345305	Cortex	DiCo	2
T cell	s2	-0.0151168	Cortex	DiCo	2
neuroepithelial cell	s2	-0.0079077	Cortex	DiCo	2
neuron	s3	1.16489	Cortex	DiCo	5
medium spiny neuron	s3	0.577425	Cortex	DiCo	5
oligodendrocyte	s3	0.45561	Cortex	DiCo	5
astrocyte	s3	0.418133	Cortex	DiCo	5
endothelial cell	s3	0.720569	Cortex	DiCo	5
interneuron	s3	0.382839	Cortex	DiCo	5
oligodendrocyte precursor cell	s3	0.528795	Cortex	DiCo	5
neuronal stem cell	s3	0.774809	Cortex	DiCo	5
brain pericyte	s3	0.266685	Cortex	DiCo	5
Bergmann glial cell	s3	-0.00267112	Cortex	DiCo	5
CD8-positive, alpha-beta T cell	s3	0.00162338	Cortex	DiCo	5
mature NK T cell	s3	0.00127156	Cortex	DiCo	5
ependymal cell	s3	-0.0256606	Cortex	DiCo	5
T cell	s3	-0.0240283	Cortex	DiCo	5
neuroepithelial cell	s3	-0.0199534	Cortex	DiCo	5
neuron	s4	1.25859	Cortex	DiCo	11
medium spiny neuron	s4	0.751954	Cortex	DiCo	11
oligodendrocyte	s4	0.638324	Cortex	DiCo	11
astrocyte	s4	0.658291	Cortex	DiCo	11
endothelial cell	s4	0.634782	Cortex	DiCo	11
interneuron	s4	0.490853	Cortex	DiCo	11
oligodendrocyte precursor cell	s4	0.479401	Cortex	DiCo	11
neuronal stem cell	s4	0.372759	Cortex	DiCo	11
brain pericyte	s4	0.20145	Cortex	DiCo	11
Bergmann glial cell	s4	0.0169639	Cortex	DiCo	11
CD8-positive, alpha-beta T cell	s4	-0.00376473	Cortex	DiCo	11
mature NK T cell	s4	-0.000829228	Cortex	DiCo	11
ependymal cell	s4	-0.0561226	Cortex	DiCo	11
T cell	s4	-0.0494306	Cortex	DiCo	11
neuroepithelial cell	s4	-0.07719	Cortex	DiCo	11
neuron	s5	1.27105	Cortex	DiCo	20
medium spiny neuron	s5	0.864304	Cortex	DiCo	20
oligodendrocyte	s5	0.834986	Cortex	DiCo	20
astrocyte	s5	0.76413	Cortex	DiCo	20
endothelial cell	s5	0.603785	Cortex	DiCo	20
interneuron	s5	0.605851	Cortex	DiCo	20
oligodendrocyte precursor cell	s5	0.318239	Cortex	DiCo	20
neuronal stem cell	s5	0.137893	Cortex	DiCo	20
brain pericyte	s5	0.168231	Cortex	DiCo	20
Bergmann glial cell	s5	0.028033	Cortex	DiCo	20
CD8-positive, alpha-beta T cell	s5	0.0233595	Cortex	DiCo	20
mature NK T cell	s5	-0.0196152	Cortex	DiCo	20
ependymal cell	s5	-0.0796352	Cortex	DiCo	20
T cell	s5	-0.0856192	Cortex	DiCo	20
neuroepithelial cell	s5	-0.0933811	Cortex	DiCo	20
neuron	s6	1.32451	Cortex	DiCo	32
medium spiny neuron	s6	0.870866	Cortex	DiCo	32
oligodendrocyte	s6	0.837829	Cortex	DiCo	32
astrocyte	s6	0.842854	Cortex	DiCo	32
endothelial cell	s6	0.583875	Cortex	DiCo	32
interneuron	s6	0.632337	Cortex	DiCo	32
oligodendrocyte precursor cell	s6	0.291053	Cortex	DiCo	32
neuronal stem cell	s6	0.132002	Cortex	DiCo	32
brain pericyte	s6	0.121208	Cortex	DiCo	32
Bergmann glial cell	s6	0.0410405	Cortex	DiCo	32
CD8-positive, alpha-beta T cell	s6	0.0135759	Cortex	DiCo	32
mature NK T cell	s6	0.00285471	Cortex	DiCo	32
ependymal cell	s6	-0.0549129	Cortex	DiCo	32
T cell	s6	-0.0675448	Cortex	DiCo	32
neuroepithelial cell	s6	-0.080957	Cortex	DiCo	32
neuron	s7	1.15397	Cortex	DiCo	61
medium spiny neuron	s7	1.00039	Cortex	DiCo	61
oligodendrocyte	s7	0.873801	Cortex	DiCo	61
astrocyte	s7	0.854766	Cortex	DiCo	61
endothelial cell	s7	0.580873	Cortex	DiCo	61
interneuron	s7	0.643048	Cortex	DiCo	61
oligodendrocyte precursor cell	s7	0.266257	Cortex	DiCo	61
neuronal stem cell	s7	0.106888	Cortex	DiCo	61
brain pericyte	s7	0.121235	Cortex	DiCo	61
Bergmann glial cell	s7	0.0301415	Cortex	DiCo	61
CD8-positive, alpha-beta T cell	s7	0.0165697	Cortex	DiCo	61
mature NK T cell	s7	-0.00972145	Cortex	DiCo	61
ependymal cell	s7	-0.0297008	Cortex	DiCo	61
T cell	s7	-0.0553048	Cortex	DiCo	61
neuroepithelial cell	s7	-0.090149	Cortex	DiCo	61
neuron	s8	1.38266	Cortex	DiCo	93
medium spiny neuron	s8	0.881189	Cortex	DiCo	93
oligodendrocyte	s8	0.837262	Cortex	DiCo	93
astrocyte	s8	0.830025	Cortex	DiCo	93
endothelial cell	s8	0.56589	Cortex	DiCo	93
interneuron	s8	0.611265	Cortex	DiCo	93
oligodendrocyte precursor cell	s8	0.279041	Cortex	DiCo	93
neuronal stem cell	s8	0.0814893	Cortex	DiCo	93
brain pericyte	s8	0.124943	Cortex	DiCo	93
Bergmann glial cell	s8	0.0543101	Cortex	DiCo	93
CD8-positive, alpha-beta T cell	s8	0.0291973	Cortex	DiCo	93
mature NK T cell	s8	-0.0148754	Cortex	DiCo	93
ependymal cell	s8	-0.0590701	Cortex	DiCo	93
T cell	s8	-0.0674082	Cortex	DiCo	93
neuroepithelial cell	s8	-0.101111	Cortex	DiCo	93
neuron	s9	1.39728	Cortex	DiCo	93
medium spiny neuron	s9	0.816144	Cortex	DiCo	93
oligodendrocyte	s9	0.781635	Cortex	DiCo	93
astrocyte	s9	0.79962	Cortex	DiCo	93
endothelial cell	s9	0.583353	Cortex	DiCo	93
interneuron	s9	0.619193	Cortex	DiCo	93
oligodendrocyte precursor cell	s9	0.293647	Cortex	DiCo	93
neuronal stem cell	s9	0.149039	Cortex	DiCo	93
brain pericyte	s9	0.161973	Cortex	DiCo	93
Bergmann glial cell	s9	0.0692658	Cortex	DiCo	93
CD8-positive, alpha-beta T cell	s9	0.0023065	Cortex	DiCo	93
mature NK T cell	s9	-0.00472803	Cortex	DiCo	93
ependymal cell	s9	-0.0438298	Cortex	DiCo	93
T cell	s9	-0.0713392	Cortex	DiCo	93
neuroepithelial cell	s9	-0.0718935	Cortex	DiCo	93
neuron	s10	1.29892	Cortex	DiCo	144
medium spiny neuron	s10	0.851076	Cortex	DiCo	144
oligodendrocyte	s10	0.82563	Cortex	DiCo	144
astrocyte	s10	0.837119	Cortex	DiCo	144
endothelial cell	s10	0.541252	Cortex	DiCo	144
interneuron	s10	0.638031	Cortex	DiCo	144
oligodendrocyte precursor cell	s10	0.29303	Cortex	DiCo	144
neuronal stem cell	s10	0.10312	Cortex	DiCo	144
brain pericyte	s10	0.172312	Cortex	DiCo	144
Bergmann glial cell	s10	0.0406945	Cortex	DiCo	144
CD8-positive, alpha-beta T cell	s10	0.0196902	Cortex	DiCo	144
mature NK T cell	s10	-0.00169273	Cortex	DiCo	144
ependymal cell	s10	-0.0327496	Cortex	DiCo	144
T cell	s10	-0.0502022	Cortex	DiCo	144
neuroepithelial cell	s10	-0.0672717	Cortex	DiCo	144
neuron	s11	1.39624	Cortex	DiCo	232
medium spiny neuron	s11	0.835833	Cortex	DiCo	232
oligodendrocyte	s11	0.835063	Cortex	DiCo	232
astrocyte	s11	0.790577	Cortex	DiCo	232
endothelial cell	s11	0.55734	Cortex	DiCo	232
interneuron	s11	0.623224	Cortex	DiCo	232
oligodendrocyte precursor cell	s11	0.290487	Cortex	DiCo	232
neuronal stem cell	s11	0.106933	Cortex	DiCo	232
brain pericyte	s11	0.143023	Cortex	DiCo	232
Bergmann glial cell	s11	0.0560999	Cortex	DiCo	232
CD8-positive, alpha-beta T cell	s11	0.0162296	Cortex	DiCo	232
mature NK T cell	s11	-0.0046392	Cortex	DiCo	232
ependymal cell	s11	-0.0480338	Cortex	DiCo	232
T cell	s11	-0.0672444	Cortex	DiCo	232
neuroepithelial cell	s11	-0.0633233	Cortex	DiCo	232
neuron	s12	1.28439	Cortex	DiCo	303
medium spiny neuron	s12	0.884798	Cortex	DiCo	303
oligodendrocyte	s12	0.860918	Cortex	DiCo	303
astrocyte	s12	0.833486	Cortex	DiCo	303
endothelial cell	s12	0.567576	Cortex	DiCo	303
interneuron	s12	0.661701	Cortex	DiCo	303
oligodendrocyte precursor cell	s12	0.273481	Cortex	DiCo	303
neuronal stem cell	s12	0.0956587	Cortex	DiCo	303
brain pericyte	s12	0.166935	Cortex	DiCo	303
Bergmann glial cell	s12	0.0384669	Cortex	DiCo	303
CD8-positive, alpha-beta T cell	s12	0.0193913	Cortex	DiCo	303
mature NK T cell	s12	0.00648004	Cortex	DiCo	303
ependymal cell	s12	-0.0275663	Cortex	DiCo	303
T cell	s12	-0.0429425	Cortex	DiCo	303
neuroepithelial cell	s12	-0.0692107	Cortex	DiCo	303
neuron	s13	1.25697	Cortex	DiCo	649
medium spiny neuron	s13	0.862979	Cortex	DiCo	649
oligodendrocyte	s13	0.876987	Cortex	DiCo	649
astrocyte	s13	0.865899	Cortex	DiCo	649
endothelial cell	s13	0.564359	Cortex	DiCo	649
interneuron	s13	0.687639	Cortex	DiCo	649
oligodendrocyte precursor cell	s13	0.284707	Cortex	DiCo	649
neuronal stem cell	s13	0.0521906	Cortex	DiCo	649
brain pericyte	s13	0.194601	Cortex	DiCo	649
Bergmann glial cell	s13	0.0502973	Cortex	DiCo	649
CD8-positive, alpha-beta T cell	s13	0.0135588	Cortex	DiCo	649
mature NK T cell	s13	-0.00875552	Cortex	DiCo	649
ependymal cell	s13	-0.0440075	Cortex	DiCo	649
T cell	s13	-0.0166994	Cortex	DiCo	649
neuroepithelial cell	s13	-0.067054	Cortex	DiCo	649
neuron	s14	1.19064	Cortex	DiCo	654
medium spiny neuron	s14	0.930031	Cortex	DiCo	654
oligodendrocyte	s14	0.910503	Cortex	DiCo	654
astrocyte	s14	0.87131	Cortex	DiCo	654
endothelial cell	s14	0.576339	Cortex	DiCo	654
interneuron	s14	0.68609	Cortex	DiCo	654
oligodendrocyte precursor cell	s14	0.279941	Cortex	DiCo	654
neuronal stem cell	s14	0.0223208	Cortex	DiCo	654
brain pericyte	s14	0.150778	Cortex	DiCo	654
Bergmann glial cell	s14	0.0234051	Cortex	DiCo	654
CD8-positive, alpha-beta T cell	s14	0.0264474	Cortex	DiCo	654
mature NK T cell	s14	-0.00301626	Cortex	DiCo	654
ependymal cell	s14	-0.0298019	Cortex	DiCo	654
T cell	s14	-0.0386698	Cortex	DiCo	654
neuroepithelial cell	s14	-0.0776382	Cortex	DiCo	654
neuron	s15	1.30964	Cortex	DiCo	904
medium spiny neuron	s15	0.804752	Cortex	DiCo	904
oligodendrocyte	s15	0.948475	Cortex	DiCo	904
astrocyte	s15	0.833704	Cortex	DiCo	904
endothelial cell	s15	0.541003	Cortex	DiCo	904
interneuron	s15	0.685201	Cortex	DiCo	904
oligodendrocyte precursor cell	s15	0.269536	Cortex	DiCo	904
neuronal stem cell	s15	0.00857821	Cortex	DiCo	904
brain pericyte	s15	0.148996	Cortex	DiCo	904
Bergmann glial cell	s15	0.0493312	Cortex	DiCo	904
CD8-positive, alpha-beta T cell	s15	0.035826	Cortex	DiCo	904
mature NK T cell	s15	0.0153772	Cortex	DiCo	904
ependymal cell	s15	-0.0531886	Cortex	DiCo	904
T cell	s15	-0.0181887	Cortex	DiCo	904
neuroepithelial cell	s15	-0.0697108	Cortex	DiCo	904
bronchial smooth muscle cell	s16	1.80848	Lung	DiCo	2
type II pneumocyte	s16	0.988072	Lung	DiCo	2
fibroblast of lung	s16	0.568321	Lung	DiCo	2
adventitial cell	s16	0.352467	Lung	DiCo	2
classical monocyte	s16	0.200004	Lung	DiCo	2
club cell of bronchiole	s16	0.234145	Lung	DiCo	2
vein endothelial cell	s16	0.180395	Lung	DiCo	2
myeloid dendritic cell	s16	0.230744	Lung	DiCo	2
B cell	s16	0.0547398	Lung	DiCo	2
pulmonary interstitial fibroblast	s16	0.439289	Lung	DiCo	2
pericyte cell	s16	0.259117	Lung	DiCo	2
ciliated columnar cell of tracheobronchial tree	s16	0.0744716	Lung	DiCo	2
smooth muscle cell of the pulmonary artery	s16	0.158571	Lung	DiCo	2
neutrophil	s16	0.109371	Lung	DiCo	2
non-classical monocyte	s16	0.123605	Lung	DiCo	2
dendritic cell	s16	0.109247	Lung	DiCo	2
respiratory basal cell	s16	0.0674655	Lung	DiCo	2
T cell	s16	0.0240337	Lung	DiCo	2
CD8-positive, alpha-beta T cell	s16	-0.00592421	Lung	DiCo	2
leukocyte	s16	0.0406681	Lung	DiCo	2
regulatory T cell	s16	-0.0174087	Lung	DiCo	2
endothelial cell of lymphatic vessel	s16	0.0593906	Lung	DiCo	2
NK cell	s16	-0.0250843	Lung	DiCo	2
CD4-positive, alpha-beta T cell	s16	-0.0319396	Lung	DiCo	2
bronchial smooth muscle cell	s17	1.8249	Lung	DiCo	2
type II pneumocyte	s17	0.926719	Lung	DiCo	2
fibroblast of lung	s17	0.545495	Lung	DiCo	2
adventitial cell	s17	0.397383	Lung	DiCo	2
classical monocyte	s17	0.195731	Lung	DiCo	2
club cell of bronchiole	s17	0.226792	Lung	DiCo	2
vein endothelial cell	s17	0.149541	Lung	DiCo	2
myeloid dendritic cell	s17	0.218481	Lung	DiCo	2
B cell	s17	0.0748154	Lung	DiCo	2
pulmonary interstitial fibroblast	s17	0.481727	Lung	DiCo	2
pericyte cell	s17	0.268371	Lung	DiCo	2
ciliated columnar cell of tracheobronchial tree	s17	0.0887549	Lung	DiCo	2
smooth muscle cell of the pulmonary artery	s17	0.141088	Lung	DiCo	2
neutrophil	s17	0.0867325	Lung	DiCo	2
non-classical monocyte	s17	0.178426	Lung	DiCo	2
dendritic cell	s17	0.105922	Lung	DiCo	2
respiratory basal cell	s17	0.0615018	Lung	DiCo	2
T cell	s17	0.0242806	Lung	DiCo	2
CD8-positive, alpha-beta T cell	s17	-0.00807706	Lung	DiCo	2
leukocyte	s17	-0.00279501	Lung	DiCo	2
regulatory T cell	s17	-0.0251278	Lung	DiCo	2
endothelial cell of lymphatic vessel	s17	0.0935988	Lung	DiCo	2
NK cell	s17	-0.00608199	Lung	DiCo	2
CD4-positive, alpha-beta T cell	s17	-0.0528839	Lung	DiCo	2
bronchial smooth muscle cell	s18	1.90946	Lung	DiCo	5
type II pneumocyte	s18	0.820645	Lung	DiCo	5
fibroblast of lung	s18	0.556366	Lung	DiCo	5
adventitial cell	s18	0.287892	Lung	DiCo	5
classical monocyte	s18	0.126586	Lung	DiCo	5
club cell of bronchiole	s18	0.227993	Lung	DiCo	5
vein endothelial cell	s18	0.158248	Lung	DiCo	5
myeloid dendritic cell	s18	0.250459	Lung	DiCo	5
B cell	s18	0.153532	Lung	DiCo	5
pulmonary interstitial fibroblast	s18	0.557682	Lung	DiCo	5
pericyte cell	s18	0.288824	Lung	DiCo	5
ciliated columnar cell of tracheobronchial tree	s18	0.0427103	Lung	DiCo	5
smooth muscle cell of the pulmonary artery	s18	0.136478	Lung	DiCo	5
neutrophil	s18	-0.0426821	Lung	DiCo	5
non-classical monocyte	s18	0.135508	Lung	DiCo	5
dendritic cell	s18	0.151626	Lung	DiCo	5
respiratory basal cell	s18	0.0335074	Lung	DiCo	5
T cell	s18	0.0285386	Lung	DiCo	5
CD8-positive, alpha-beta T cell	s18	0.0263922	Lung	DiCo	5
leukocyte	s18	0.0319762	Lung	DiCo	5
regulatory T cell	s18	-0.0226383	Lung	DiCo	5
endothelial cell of lymphatic vessel	s18	0.0695581	Lung	DiCo	5
NK cell	s18	-0.0159604	Lung	DiCo	5
CD4-positive, alpha-beta T cell	s18	-0.0294776	Lung	DiCo	5
bronchial smooth muscle cell	s19	2.11097	Lung	DiCo	11
type II pneumocyte	s19	0.892834	Lung	DiCo	11
fibroblast of lung	s19	0.770908	Lung	DiCo	11
adventitial cell	s19	0.231552	Lung	DiCo	11
classical monocyte	s19	0.125058	Lung	DiCo	11
club cell of bronchiole	s19	0.227132	Lung	DiCo	11
vein endothelial cell	s19	0.201796	Lung	DiCo	11
myeloid dendritic cell	s19	0.258996	Lung	DiCo	11
B cell	s19	0.167901	Lung	DiCo	11
pulmonary interstitial fibroblast	s19	0.497021	Lung	DiCo	11
pericyte cell	s19	0.292408	Lung	DiCo	11
ciliated columnar cell of tracheobronchial tree	s19	0.0415925	Lung	DiCo	11
smooth muscle cell of the pulmonary artery	s19	0.130959	Lung	DiCo	11
neutrophil	s19	0.00621078	Lung	DiCo	11
non-classical monocyte	s19	0.117501	Lung	DiCo	11
dendritic cell	s19	0.0771915	Lung	DiCo	11
respiratory basal cell	s19	0.0242337	Lung	DiCo	11
T cell	s19	0.019738	Lung	DiCo	11
CD8-positive, alpha-beta T cell	s19	0.0204338	Lung	DiCo	11
leukocyte	s19	8.30129e-06	Lung	DiCo	11
regulatory T cell	s19	-0.0120658	Lung	DiCo	11
endothelial cell of lymphatic vessel	s19	0.023418	Lung	DiCo	11
NK cell	s19	-0.0432441	Lung	DiCo	11
CD4-positive, alpha-beta T cell	s19	-0.0565383	Lung	DiCo	11
bronchial smooth muscle cell	s20	2.39412	Lung	DiCo	20
type II pneumocyte	s20	0.997924	Lung	DiCo	20
fibroblast of lung	s20	0.90933	Lung	DiCo	20
adventitial cell	s20	0.204667	Lung	DiCo	20
classical monocyte	s20	0.15835	Lung	DiCo	20
club cell of bronchiole	s20	0.268738	Lung	DiCo	20
vein endothelial cell	s20	0.212784	Lung	DiCo	20
myeloid dendritic cell	s20	0.263335	Lung	DiCo	20
B cell	s20	0.21625	Lung	DiCo	20
pulmonary interstitial fibroblast	s20	0.150653	Lung	DiCo	20
pericyte cell	s20	0.240698	Lung	DiCo	20
ciliated columnar cell of tracheobronchial tree	s20	0.113884	Lung	DiCo	20
smooth muscle cell of the pulmonary artery	s20	0.160797	Lung	DiCo	20
neutrophil	s20	0.0871079	Lung	DiCo	20
non-classical monocyte	s20	0.141948	Lung	DiCo	20
dendritic cell	s20	0.0506588	Lung	DiCo	20
respiratory basal cell	s20	0.0335577	Lung	DiCo	20
T cell	s20	0.0187068	Lung	DiCo	20
CD8-positive, alpha-beta T cell	s20	-0.0145174	Lung	DiCo	20
leukocyte	s20	-0.0218623	Lung	DiCo	20
regulatory T cell	s20	-0.0102803	Lung	DiCo	20
endothelial cell of lymphatic vessel	s20	-0.0319047	Lung	DiCo	20
NK cell	s20	-0.0760461	Lung	DiCo	20
CD4-positive, alpha-beta T cell	s20	-0.0658654	Lung	DiCo	20
bronchial smooth muscle cell	s21	2.0761	Lung	DiCo	32
type II pneumocyte	s21	0.828512	Lung	DiCo	32
fibroblast of lung	s21	0.597888	Lung	DiCo	32
adventitial cell	s21	0.27768	Lung	DiCo	32
classical monocyte	s21	0.179858	Lung	DiCo	32
club cell of bronchiole	s21	0.284944	Lung	DiCo	32
vein endothelial cell	s21	0.235925	Lung	DiCo	32
myeloid dendritic cell	s21	0.18945	Lung	DiCo	32
B cell	s21	0.292445	Lung	DiCo	32
pulmonary interstitial fibroblast	s21	0.201481	Lung	DiCo	32
pericyte cell	s21	0.149681	Lung	DiCo	32
ciliated columnar cell of tracheobronchial tree	s21	0.154994	Lung	DiCo	32
smooth muscle cell of the pulmonary artery	s21	0.084471	Lung	DiCo	32
neutrophil	s21	0.23404	Lung	DiCo	32
non-classical monocyte	s21	0.092264	Lung	DiCo	32
dendritic cell	s21	0.17148	Lung	DiCo	32
respiratory basal cell	s21	0.119864	Lung	DiCo	32
T cell	s21	0.0241934	Lung	DiCo	32
CD8-positive, alpha-beta T cell	s21	0.0298682	Lung	DiCo	32
leukocyte	s21	0.0118788	Lung	DiCo	32
regulatory T cell	s21	-0.0232766	Lung	DiCo	32
endothelial cell of lymphatic vessel	s21	-0.0492375	Lung	DiCo	32
NK cell	s21	-0.0421802	Lung	DiCo	32
CD4-positive, alpha-beta T cell	s21	0.014736	Lung	DiCo	32
bronchial smooth muscle cell	s22	2.26696	Lung	DiCo	61
type II pneumocyte	s22	1.06349	Lung	DiCo	61
fibroblast of lung	s22	0.738374	Lung	DiCo	61
adventitial cell	s22	0.241827	Lung	DiCo	61
classical monocyte	s22	0.324208	Lung	DiCo	61
club cell of bronchiole	s22	0.310073	Lung	DiCo	61
vein endothelial cell	s22	0.321923	Lung	DiCo	61
myeloid dendritic cell	s22	0.226938	Lung	DiCo	61
B cell	s22	0.0675459	Lung	DiCo	61
pulmonary interstitial fibroblast	s22	0.107803	Lung	DiCo	61
pericyte cell	s22	0.175675	Lung	DiCo	61
ciliated columnar cell of tracheobronchial tree	s22	0.188465	Lung	DiCo	61
smooth muscle cell of the pulmonary artery	s22	0.136311	Lung	DiCo	61
neutrophil	s22	0.440794	Lung	DiCo	61
non-classical monocyte	s22	0.0214625	Lung	DiCo	61
dendritic cell	s22	0.0397171	Lung	DiCo	61
respiratory basal cell	s22	0.0699687	Lung	DiCo	61
T cell	s22	0.0206037	Lung	DiCo	61
CD8-positive, alpha-beta T cell	s22	-0.0118429	Lung	DiCo	61
leukocyte	s22	-0.0276372	Lung	DiCo	61
regulatory T cell	s22	-0.0158763	Lung	DiCo	61
endothelial cell of lymphatic vessel	s22	-0.0725819	Lung	DiCo	61
NK cell	s22	-0.0855651	Lung	DiCo	61
CD4-positive, alpha-beta T cell	s22	-0.126861	Lung	DiCo	61
bronchial smooth muscle cell	s23	2.1634	Lung	DiCo	93
type II pneumocyte	s23	1.0053	Lung	DiCo	93
fibroblast of lung	s23	0.670368	Lung	DiCo	93
adventitial cell	s23	0.209964	Lung	DiCo	93
classical monocyte	s23	0.213327	Lung	DiCo	93
club cell of bronchiole	s23	0.179338	Lung	DiCo	93
vein endothelial cell	s23	0.287202	Lung	DiCo	93
myeloid dendritic cell	s23	0.272301	Lung	DiCo	93
B cell	s23	0.200544	Lung	DiCo	93
pulmonary interstitial fibroblast	s23	0.150839	Lung	DiCo	93
pericyte cell	s23	0.161212	Lung	DiCo	93
ciliated columnar cell of tracheobronchial tree	s23	0.296143	Lung	DiCo	93
smooth muscle cell of the pulmonary artery	s23	0.138152	Lung	DiCo	93
neutrophil	s23	0.115369	Lung	DiCo	93
non-classical monocyte	s23	0.114637	Lung	DiCo	93
dendritic cell	s23	0.0813372	Lung	DiCo	93
respiratory basal cell	s23	0.104686	Lung	DiCo	93
T cell	s23	0.0259122	Lung	DiCo	93
CD8-positive, alpha-beta T cell	s23	0.0418833	Lung	DiCo	93
leukocyte	s23	-0.0169707	Lung	DiCo	93
regulatory T cell	s23	-0.00489952	Lung	DiCo	93
endothelial cell of lymphatic vessel	s23	-0.0644266	Lung	DiCo	93
NK cell	s23	-0.0723668	Lung	DiCo	93
CD4-positive, alpha-beta T cell	s23	-0.0899638	Lung	DiCo	93
bronchial smooth muscle cell	s24	2.49615	Lung	DiCo	93
type II pneumocyte	s24	1.08668	Lung	DiCo	93
fibroblast of lung	s24	0.789914	Lung	DiCo	93
adventitial cell	s24	0.239732	Lung	DiCo	93
classical monocyte	s24	0.202926	Lung	DiCo	93
club cell of bronchiole	s24	0.295873	Lung	DiCo	93
vein endothelial cell	s24	0.275403	Lung	DiCo	93
myeloid dendritic cell	s24	0.257482	Lung	DiCo	93
B cell	s24	0.148378	Lung	DiCo	93
pulmonary interstitial fibroblast	s24	0.0863936	Lung	DiCo	93
pericyte cell	s24	0.184619	Lung	DiCo	93
ciliated columnar cell of tracheobronchial tree	s24	0.172544	Lung	DiCo	93
smooth muscle cell of the pulmonary artery	s24	0.151437	Lung	DiCo	93
neutrophil	s24	0.0908411	Lung	DiCo	93
non-classical monocyte	s24	0.178388	Lung	DiCo	93
dendritic cell	s24	0.024346	Lung	DiCo	93
respiratory basal cell	s24	0.0351998	Lung	DiCo	93
T cell	s24	0.0147828	Lung	DiCo	93
CD8-positive, alpha-beta T cell	s24	-0.00911771	Lung	DiCo	93
leukocyte	s24	-0.0639758	Lung	DiCo	93
regulatory T cell	s24	-0.00679412	Lung	DiCo	93
endothelial cell of lymphatic vessel	s24	-0.0527393	Lung	DiCo	93
NK cell	s24	-0.0807545	Lung	DiCo	93
CD4-positive, alpha-beta T cell	s24	-0.124616	Lung	DiCo	93
bronchial smooth muscle cell	s25	2.33059	Lung	DiCo	144
type II pneumocyte	s25	0.922546	Lung	DiCo	144
fibroblast of lung	s25	0.724642	Lung	DiCo	144
adventitial cell	s25	0.197482	Lung	DiCo	144
classical monocyte	s25	0.202139	Lung	DiCo	144
club cell of bronchiole	s25	0.311331	Lung	DiCo	144
vein endothelial cell	s25	0.285921	Lung	DiCo	144
myeloid dendritic cell	s25	0.267076	Lung	DiCo	144
B cell	s25	0.208572	Lung	DiCo	144
pulmonary interstitial fibroblast	s25	0.129656	Lung	DiCo	144
pericyte cell	s25	0.169068	Lung	DiCo	144
ciliated columnar cell of tracheobronchial tree	s25	0.253336	Lung	DiCo	144
smooth muscle cell of the pulmonary artery	s25	0.130102	Lung	DiCo	144
neutrophil	s25	0.116537	Lung	DiCo	144
non-classical monocyte	s25	0.144475	Lung	DiCo	144
dendritic cell	s25	0.0493874	Lung	DiCo	144
respiratory basal cell	s25	0.0728681	Lung	DiCo	144
T cell	s25	0.0200683	Lung	DiCo	144
CD8-positive, alpha-beta T cell	s25	-0.00395188	Lung	DiCo	144
leukocyte	s25	-0.0259708	Lung	DiCo	144
regulatory T cell	s25	-0.00335831	Lung	DiCo	144
endothelial cell of lymphatic vessel	s25	-0.0671411	Lung	DiCo	144
NK cell	s25	-0.040463	Lung	DiCo	144
CD4-positive, alpha-beta T cell	s25	-0.059862	Lung	DiCo	144
bronchial smooth muscle cell	s26	2.23713	Lung	DiCo	232
type II pneumocyte	s26	1.00032	Lung	DiCo	232
fibroblast of lung	s26	0.738878	Lung	DiCo	232
adventitial cell	s26	0.230586	Lung	DiCo	232
classical monocyte	s26	0.206926	Lung	DiCo	232
club cell of bronchiole	s26	0.303191	Lung	DiCo	232
vein endothelial cell	s26	0.281533	Lung	DiCo	232
myeloid dendritic cell	s26	0.257077	Lung	DiCo	232
B cell	s26	0.250845	Lung	DiCo	232
pulmonary interstitial fibroblast	s26	0.131169	Lung	DiCo	232
pericyte cell	s26	0.162851	Lung	DiCo	232
ciliated columnar cell of tracheobronchial tree	s26	0.228545	Lung	DiCo	232
smooth muscle cell of the pulmonary artery	s26	0.15351	Lung	DiCo	232
neutrophil	s26	0.148729	Lung	DiCo	232
non-classical monocyte	s26	0.108758	Lung	DiCo	232
dendritic cell	s26	0.0472918	Lung	DiCo	232
respiratory basal cell	s26	0.0511147	Lung	DiCo	232
T cell	s26	0.0198041	Lung	DiCo	232
CD8-positive, alpha-beta T cell	s26	0.00404096	Lung	DiCo	232
leukocyte	s26	-0.0222228	Lung	DiCo	232
regulatory T cell	s26	-0.00428956	Lung	DiCo	232
endothelial cell of lymphatic vessel	s26	-0.0590786	Lung	DiCo	232
NK cell	s26	-0.0556517	Lung	DiCo	232
CD4-positive, alpha-beta T cell	s26	-0.0713839	Lung	DiCo	232
bronchial smooth muscle cell	s27	2.07265	Lung	DiCo	303
type II pneumocyte	s27	0.923125	Lung	DiCo	303
fibroblast of lung	s27	0.577375	Lung	DiCo	303
adventitial cell	s27	0.274359	Lung	DiCo	303
classical monocyte	s27	0.286948	Lung	DiCo	303
club cell of bronchiole	s27	0.199668	Lung	DiCo	303
vein endothelial cell	s27	0.358647	Lung	DiCo	303
myeloid dendritic cell	s27	0.25297	Lung	DiCo	303
B cell	s27	0.0702238	Lung	DiCo	303
pulmonary interstitial fibroblast	s27	0.168334	Lung	DiCo	303
pericyte cell	s27	0.131009	Lung	DiCo	303
ciliated columnar cell of tracheobronchial tree	s27	0.286991	Lung	DiCo	303
smooth muscle cell of the pulmonary artery	s27	0.123542	Lung	DiCo	303
neutrophil	s27	0.29236	Lung	DiCo	303
non-classical monocyte	s27	0.000778557	Lung	DiCo	303
dendritic cell	s27	0.074003	Lung	DiCo	303
respiratory basal cell	s27	0.0965372	Lung	DiCo	303
T cell	s27	0.0381462	Lung	DiCo	303
CD8-positive, alpha-beta T cell	s27	0.0320354	Lung	DiCo	303
leukocyte	s27	0.0393769	Lung	DiCo	303
regulatory T cell	s27	-0.00732558	Lung	DiCo	303
endothelial cell of lymphatic vessel	s27	-0.0658788	Lung	DiCo	303
NK cell	s27	-0.091819	Lung	DiCo	303
CD4-positive, alpha-beta T cell	s27	-0.112307	Lung	DiCo	303
bronchial smooth muscle cell	s28	2.12326	Lung	DiCo	649
type II pneumocyte	s28	0.910189	Lung	DiCo	649
fibroblast of lung	s28	0.621746	Lung	DiCo	649
adventitial cell	s28	0.196245	Lung	DiCo	649
classical monocyte	s28	0.250519	Lung	DiCo	649
club cell of bronchiole	s28	0.182048	Lung	DiCo	649
vein endothelial cell	s28	0.29614	Lung	DiCo	649
myeloid dendritic cell	s28	0.252271	Lung	DiCo	649
B cell	s28	0.270807	Lung	DiCo	649
pulmonary interstitial fibroblast	s28	0.164645	Lung	DiCo	649
pericyte cell	s28	0.137094	Lung	DiCo	649
ciliated columnar cell of tracheobronchial tree	s28	0.302577	Lung	DiCo	649
smooth muscle cell of the pulmonary artery	s28	0.153565	Lung	DiCo	649
neutrophil	s28	0.119302	Lung	DiCo	649
non-classical monocyte	s28	0.109919	Lung	DiCo	649
dendritic cell	s28	0.0710756	Lung	DiCo	649
respiratory basal cell	s28	0.0847197	Lung	DiCo	649
T cell	s28	0.0204061	Lung	DiCo	649
CD8-positive, alpha-beta T cell	s28	0.0259734	Lung	DiCo	649
leukocyte	s28	0.0121346	Lung	DiCo	649
regulatory T cell	s28	-0.00174917	Lung	DiCo	649
endothelial cell of lymphatic vessel	s28	-0.0649675	Lung	DiCo	649
NK cell	s28	-0.0548445	Lung	DiCo	649
CD4-positive, alpha-beta T cell	s28	-0.108012	Lung	DiCo	649
bronchial smooth muscle cell	s29	1.40069	Lung	DiCo	654
type II pneumocyte	s29	0.605091	Lung	DiCo	654
fibroblast of lung	s29	0.278982	Lung	DiCo	654
adventitial cell	s29	0.622137	Lung	DiCo	654
classical monocyte	s29	0.520068	Lung	DiCo	654
club cell of bronchiole	s29	0.289707	Lung	DiCo	654
vein endothelial cell	s29	0.198006	Lung	DiCo	654
myeloid dendritic cell	s29	0.228237	Lung	DiCo	654
B cell	s29	0.494956	Lung	DiCo	654
pulmonary interstitial fibroblast	s29	0.262203	Lung	DiCo	654
pericyte cell	s29	0.0505189	Lung	DiCo	654
ciliated columnar cell of tracheobronchial tree	s29	0.142138	Lung	DiCo	654
smooth muscle cell of the pulmonary artery	s29	0.111813	Lung	DiCo	654
neutrophil	s29	0.0523427	Lung	DiCo	654
non-classical monocyte	s29	0.0547816	Lung	DiCo	654
dendritic cell	s29	0.137141	Lung	DiCo	654
respiratory basal cell	s29	0.114262	Lung	DiCo	654
T cell	s29	0.0210421	Lung	DiCo	654
CD8-positive, alpha-beta T cell	s29	0.0561867	Lung	DiCo	654
leukocyte	s29	0.053838	Lung	DiCo	654
regulatory T cell	s29	-0.013225	Lung	DiCo	654
endothelial cell of lymphatic vessel	s29	0.0140132	Lung	DiCo	654
NK cell	s29	0.0545154	Lung	DiCo	654
CD4-positive, alpha-beta T cell	s29	-0.0250551	Lung	DiCo	654
bronchial smooth muscle cell	s30	1.4721	Lung	DiCo	904
type II pneumocyte	s30	0.693054	Lung	DiCo	904
fibroblast of lung	s30	0.294439	Lung	DiCo	904
adventitial cell	s30	0.238213	Lung	DiCo	904
classical monocyte	s30	0.578638	Lung	DiCo	904
club cell of bronchiole	s30	0.239752	Lung	DiCo	904
vein endothelial cell	s30	0.265622	Lung	DiCo	904
myeloid dendritic cell	s30	0.278256	Lung	DiCo	904
B cell	s30	0.848903	Lung	DiCo	904
pulmonary interstitial fibroblast	s30	0.0017886	Lung	DiCo	904
pericyte cell	s30	0.038322	Lung	DiCo	904
ciliated columnar cell of tracheobronchial tree	s30	0.132071	Lung	DiCo	904
smooth muscle cell of the pulmonary artery	s30	0.0912377	Lung	DiCo	904
neutrophil	s30	0.0379899	Lung	DiCo	904
non-classical monocyte	s30	0.0687877	Lung	DiCo	904
dendritic cell	s30	0.189435	Lung	DiCo	904
respiratory basal cell	s30	0.0782875	Lung	DiCo	904
T cell	s30	0.0179381	Lung	DiCo	904
CD8-positive, alpha-beta T cell	s30	0.0663694	Lung	DiCo	904
leukocyte	s30	-0.000511424	Lung	DiCo	904
regulatory T cell	s30	-0.00615282	Lung	DiCo	904
endothelial cell of lymphatic vessel	s30	-0.0306823	Lung	DiCo	904
NK cell	s30	0.152879	Lung	DiCo	904
CD4-positive, alpha-beta T cell	s30	0.0326769	Lung	DiCo	904
bronchial smooth muscle cell	s31	1.8941	Lung	DiCo	904
type II pneumocyte	s31	0.777373	Lung	DiCo	904
fibroblast of lung	s31	0.482495	Lung	DiCo	904
adventitial cell	s31	0.25598	Lung	DiCo	904
classical monocyte	s31	0.377348	Lung	DiCo	904
club cell of bronchiole	s31	0.297259	Lung	DiCo	904
vein endothelial cell	s31	0.339978	Lung	DiCo	904
myeloid dendritic cell	s31	0.245439	Lung	DiCo	904
B cell	s31	0.293404	Lung	DiCo	904
pulmonary interstitial fibroblast	s31	0.143155	Lung	DiCo	904
pericyte cell	s31	0.0785203	Lung	DiCo	904
ciliated columnar cell of tracheobronchial tree	s31	0.2468	Lung	DiCo	904
smooth muscle cell of the pulmonary artery	s31	0.1069	Lung	DiCo	904
neutrophil	s31	0.141403	Lung	DiCo	904
non-classical monocyte	s31	0.0745111	Lung	DiCo	904
dendritic cell	s31	0.144021	Lung	DiCo	904
respiratory basal cell	s31	0.0984222	Lung	DiCo	904
T cell	s31	0.0285112	Lung	DiCo	904
CD8-positive, alpha-beta T cell	s31	0.0535545	Lung	DiCo	904
leukocyte	s31	0.0341129	Lung	DiCo	904
regulatory T cell	s31	-0.00652677	Lung	DiCo	904
endothelial cell of lymphatic vessel	s31	-0.075008	Lung	DiCo	904
NK cell	s31	0.00479071	Lung	DiCo	904
CD4-positive, alpha-beta T cell	s31	-0.125808	Lung	DiCo	904
hepatocyte	s32	2.44414	Liver	DiCo	2
endothelial cell of hepatic sinusoid	s32	0.900972	Liver	DiCo	2
Kupffer cell	s32	0.60124	Liver	DiCo	2
myeloid leukocyte	s32	0.450674	Liver	DiCo	2
B cell	s32	0.279387	Liver	DiCo	2
mature NK T cell	s32	0.233432	Liver	DiCo	2
NK cell	s32	0.161767	Liver	DiCo	2
T cell	s32	0.127702	Liver	DiCo	2
neutrophil	s32	0.156427	Liver	DiCo	2
CD4-positive, alpha-beta T cell	s32	0.037947	Liver	DiCo	2
hepatocyte	s33	2.49836	Liver	DiCo	2
endothelial cell of hepatic sinusoid	s33	0.917625	Liver	DiCo	2
Kupffer cell	s33	0.60161	Liver	DiCo	2
myeloid leukocyte	s33	0.434047	Liver	DiCo	2
B cell	s33	0.294337	Liver	DiCo	2
mature NK T cell	s33	0.265558	Liver	DiCo	2
NK cell	s33	0.146938	Liver	DiCo	2
T cell	s33	0.119475	Liver	DiCo	2
neutrophil	s33	0.147408	Liver	DiCo	2
CD4-positive, alpha-beta T cell	s33	0.0427214	Liver	DiCo	2
hepatocyte	s34	2.54759	Liver	DiCo	5
endothelial cell of hepatic sinusoid	s34	1.00324	Liver	DiCo	5
Kupffer cell	s34	0.650957	Liver	DiCo	5
myeloid leukocyte	s34	0.367805	Liver	DiCo	5
B cell	s34	0.25355	Liver	DiCo	5
mature NK T cell	s34	0.239346	Liver	DiCo	5
NK cell	s34	0.130511	Liver	DiCo	5
T cell	s34	0.103282	Liver	DiCo	5
neutrophil	s34	0.134586	Liver	DiCo	5
CD4-positive, alpha-beta T cell	s34	0.0249683	Liver	DiCo	5
hepatocyte	s35	2.99608	Liver	DiCo	11
endothelial cell of hepatic sinusoid	s35	1.10744	Liver	DiCo	11
Kupffer cell	s35	0.545551	Liver	DiCo	11
myeloid leukocyte	s35	0.225524	Liver	DiCo	11
B cell	s35	0.225314	Liver	DiCo	11
mature NK T cell	s35	0.222996	Liver	DiCo	11
NK cell	s35	0.110545	Liver	DiCo	11
T cell	s35	0.0647457	Liver	DiCo	11
neutrophil	s35	0.0418828	Liver	DiCo	11
CD4-positive, alpha-beta T cell	s35	0.0119078	Liver	DiCo	11
hepatocyte	s36	3.35203	Liver	DiCo	20
endothelial cell of hepatic sinusoid	s36	1.02449	Liver	DiCo	20
Kupffer cell	s36	0.515634	Liver	DiCo	20
myeloid leukocyte	s36	0.22018	Liver	DiCo	20
B cell	s36	0.172143	Liver	DiCo	20
mature NK T cell	s36	0.21348	Liver	DiCo	20
NK cell	s36	0.100702	Liver	DiCo	20
T cell	s36	0.045619	Liver	DiCo	20
neutrophil	s36	-0.016478	Liver	DiCo	20
CD4-positive, alpha-beta T cell	s36	0.0129962	Liver	DiCo	20
hepatocyte	s37	3.59151	Liver	DiCo	32
endothelial cell of hepatic sinusoid	s37	0.832861	Liver	DiCo	32
Kupffer cell	s37	0.445879	Liver	DiCo	32
myeloid leukocyte	s37	0.249424	Liver	DiCo	32
B cell	s37	0.161678	Liver	DiCo	32
mature NK T cell	s37	0.194747	Liver	DiCo	32
NK cell	s37	0.113586	Liver	DiCo	32
T cell	s37	0.0123186	Liver	DiCo	32
neutrophil	s37	0.00218156	Liver	DiCo	32
CD4-positive, alpha-beta T cell	s37	0.00840493	Liver	DiCo	32
hepatocyte	s38	3.55632	Liver	DiCo	61
endothelial cell of hepatic sinusoid	s38	0.91008	Liver	DiCo	61
Kupffer cell	s38	0.41802	Liver	DiCo	61
myeloid leukocyte	s38	0.242788	Liver	DiCo	61
B cell	s38	0.158508	Liver	DiCo	61
mature NK T cell	s38	0.213927	Liver	DiCo	61
NK cell	s38	0.117024	Liver	DiCo	61
T cell	s38	-0.00161337	Liver	DiCo	61
neutrophil	s38	0.043918	Liver	DiCo	61
CD4-positive, alpha-beta T cell	s38	0.015617	Liver	DiCo	61
hepatocyte	s39	3.53026	Liver	DiCo	93
endothelial cell of hepatic sinusoid	s39	0.953395	Liver	DiCo	93
Kupffer cell	s39	0.448596	Liver	DiCo	93
myeloid leukocyte	s39	0.215642	Liver	DiCo	93
B cell	s39	0.177952	Liver	DiCo	93
mature NK T cell	s39	0.199025	Liver	DiCo	93
NK cell	s39	0.081328	Liver	DiCo	93
T cell	s39	-0.00165248	Liver	DiCo	93
neutrophil	s39	-0.0117751	Liver	DiCo	93
CD4-positive, alpha-beta T cell	s39	0.00689149	Liver	DiCo	93
hepatocyte	s40	3.72849	Liver	DiCo	93
endothelial cell of hepatic sinusoid	s40	0.889266	Liver	DiCo	93
Kupffer cell	s40	0.339587	Liver	DiCo	93
myeloid leukocyte	s40	0.21942	Liver	DiCo	93
B cell	s40	0.194525	Liver	DiCo	93
mature NK T cell	s40	0.204433	Liver	DiCo	93
NK cell	s40	0.0835484	Liver	DiCo	93
T cell	s40	-0.00541847	Liver	DiCo	93
neutrophil	s40	-0.044869	Liver	DiCo	93
CD4-positive, alpha-beta T cell	s40	0.0113706	Liver	DiCo	93
hepatocyte	s41	3.63334	Liver	DiCo	144
endothelial cell of hepatic sinusoid	s41	0.840757	Liver	DiCo	144
Kupffer cell	s41	0.449027	Liver	DiCo	144
myeloid leukocyte	s41	0.219191	Liver	DiCo	144
B cell	s41	0.210298	Liver	DiCo	144
mature NK T cell	s41	0.190972	Liver	DiCo	144
NK cell	s41	0.0852662	Liver	DiCo	144
T cell	s41	-0.00465692	Liver	DiCo	144
neutrophil	s41	-0.0289705	Liver	DiCo	144
CD4-positive, alpha-beta T cell	s41	0.0105077	Liver	DiCo	144
hepatocyte	s42	3.67432	Liver	DiCo	232
endothelial cell of hepatic sinusoid	s42	0.839415	Liver	DiCo	232
Kupffer cell	s42	0.436489	Liver	DiCo	232
myeloid leukocyte	s42	0.223321	Liver	DiCo	232
B cell	s42	0.201762	Liver	DiCo	232
mature NK T cell	s42	0.201323	Liver	DiCo	232
NK cell	s42	0.0783186	Liver	DiCo	232
T cell	s42	-0.019464	Liver	DiCo	232
neutrophil	s42	-0.0313483	Liver	DiCo	232
CD4-positive, alpha-beta T cell	s42	0.00930182	Liver	DiCo	232
hepatocyte	s43	3.62378	Liver	DiCo	303
endothelial cell of hepatic sinusoid	s43	0.871666	Liver	DiCo	303
Kupffer cell	s43	0.370077	Liver	DiCo	303
myeloid leukocyte	s43	0.212751	Liver	DiCo	303
B cell	s43	0.201673	Liver	DiCo	303
mature NK T cell	s43	0.20105	Liver	DiCo	303
NK cell	s43	0.0847941	Liver	DiCo	303
T cell	s43	-0.00842756	Liver	DiCo	303
neutrophil	s43	0.0232528	Liver	DiCo	303
CD4-positive, alpha-beta T cell	s43	0.0118121	Liver	DiCo	303
hepatocyte	s44	3.59228	Liver	DiCo	649
endothelial cell of hepatic sinusoid	s44	0.778577	Liver	DiCo	649
Kupffer cell	s44	0.393949	Liver	DiCo	649
myeloid leukocyte	s44	0.213786	Liver	DiCo	649
B cell	s44	0.247571	Liver	DiCo	649
mature NK T cell	s44	0.205983	Liver	DiCo	649
NK cell	s44	0.0818282	Liver	DiCo	649
T cell	s44	0.0051932	Liver	DiCo	649
neutrophil	s44	-0.0305826	Liver	DiCo	649
CD4-positive, alpha-beta T cell	s44	0.00643532	Liver	DiCo	649
hepatocyte	s45	3.36065	Liver	DiCo	654
endothelial cell of hepatic sinusoid	s45	0.782128	Liver	DiCo	654
Kupffer cell	s45	0.547366	Liver	DiCo	654
myeloid leukocyte	s45	0.233017	Liver	DiCo	654
B cell	s45	0.221203	Liver	DiCo	654
mature NK T cell	s45	0.188596	Liver	DiCo	654
NK cell	s45	0.0820971	Liver	DiCo	654
T cell	s45	0.0122453	Liver	DiCo	654
neutrophil	s45	0.0119577	Liver	DiCo	654
CD4-positive, alpha-beta T cell	s45	0.00937129	Liver	DiCo	654
hepatocyte	s46	3.22643	Liver	DiCo	904
endothelial cell of hepatic sinusoid	s46	0.773302	Liver	DiCo	904
Kupffer cell	s46	0.719948	Liver	DiCo	904
myeloid leukocyte	s46	0.255561	Liver	DiCo	904
B cell	s46	0.306647	Liver	DiCo	904
mature NK T cell	s46	0.193513	Liver	DiCo	904
NK cell	s46	0.0835531	Liver	DiCo	904
T cell	s46	0.00784715	Liver	DiCo	904
neutrophil	s46	0.00951929	Liver	DiCo	904
CD4-positive, alpha-beta T cell	s46	0.00706955	Liver	DiCo	904
hepatocyte	s47	3.32492	Liver	DiCo	904
endothelial cell of hepatic sinusoid	s47	0.845273	Liver	DiCo	904
Kupffer cell	s47	0.605986	Liver	DiCo	904
myeloid leukocyte	s47	0.245239	Liver	DiCo	904
B cell	s47	0.23388	Liver	DiCo	904
mature NK T cell	s47	0.19063	Liver	DiCo	904
NK cell	s47	0.0778242	Liver	DiCo	904
T cell	s47	0.00289415	Liver	DiCo	904
neutrophil	s47	0.0351919	Liver	DiCo	904
CD4-positive, alpha-beta T cell	s47	0.00972732	Liver	DiCo	904
skeletal muscle satellite cell	s48	1.44955	Muscle	DiCo	2
mesenchymal stem cell	s48	1.57064	Muscle	DiCo	2
macrophage	s48	0.518571	Muscle	DiCo	2
B cell	s48	0.0992424	Muscle	DiCo	2
endothelial cell	s48	0.349708	Muscle	DiCo	2
T cell	s48	0.222224	Muscle	DiCo	2
skeletal muscle satellite cell	s49	1.44208	Muscle	DiCo	2
mesenchymal stem cell	s49	1.61284	Muscle	DiCo	2
macrophage	s49	0.505236	Muscle	DiCo	2
B cell	s49	0.109798	Muscle	DiCo	2
endothelial cell	s49	0.329821	Muscle	DiCo	2
T cell	s49	0.222536	Muscle	DiCo	2
skeletal muscle satellite cell	s50	1.43177	Muscle	DiCo	5
mesenchymal stem cell	s50	1.44314	Muscle	DiCo	5
macrophage	s50	0.483412	Muscle	DiCo	5
B cell	s50	0.153796	Muscle	DiCo	5
endothelial cell	s50	0.39796	Muscle	DiCo	5
T cell	s50	0.204869	Muscle	DiCo	5
skeletal muscle satellite cell	s51	1.18766	Muscle	DiCo	11
mesenchymal stem cell	s51	1.88392	Muscle	DiCo	11
macrophage	s51	0.667763	Muscle	DiCo	11
B cell	s51	0.176187	Muscle	DiCo	11
endothelial cell	s51	0.319262	Muscle	DiCo	11
T cell	s51	0.222473	Muscle	DiCo	11
skeletal muscle satellite cell	s52	1.02584	Muscle	DiCo	20
mesenchymal stem cell	s52	1.32081	Muscle	DiCo	20
macrophage	s52	0.729501	Muscle	DiCo	20
B cell	s52	0.51955	Muscle	DiCo	20
endothelial cell	s52	0.208342	Muscle	DiCo	20
T cell	s52	0.178483	Muscle	DiCo	20
skeletal muscle satellite cell	s53	1.64886	Muscle	DiCo	32
mesenchymal stem cell	s53	1.11466	Muscle	DiCo	32
macrophage	s53	0.379111	Muscle	DiCo	32
B cell	s53	0.162915	Muscle	DiCo	32
endothelial cell	s53	0.48258	Muscle	DiCo	32
T cell	s53	0.145021	Muscle	DiCo	32
skeletal muscle satellite cell	s54	2.11292	Muscle	DiCo	61
mesenchymal stem cell	s54	0.735429	Muscle	DiCo	61
macrophage	s54	0.311357	Muscle	DiCo	61
B cell	s54	0.201923	Muscle	DiCo	61
endothelial cell	s54	0.147985	Muscle	DiCo	61
T cell	s54	0.167727	Muscle	DiCo	61
skeletal muscle satellite cell	s55	1.81713	Muscle	DiCo	93
mesenchymal stem cell	s55	1.03152	Muscle	DiCo	93
macrophage	s55	0.401112	Muscle	DiCo	93
B cell	s55	0.316333	Muscle	DiCo	93
endothelial cell	s55	0.064215	Muscle	DiCo	93
T cell	s55	0.174939	Muscle	DiCo	93
skeletal muscle satellite cell	s56	2.03853	Muscle	DiCo	93
mesenchymal stem cell	s56	0.678521	Muscle	DiCo	93
macrophage	s56	0.280916	Muscle	DiCo	93
B cell	s56	0.272509	Muscle	DiCo	93
endothelial cell	s56	0.18803	Muscle	DiCo	93
T cell	s56	0.157117	Muscle	DiCo	93
skeletal muscle satellite cell	s57	1.75029	Muscle	DiCo	144
mesenchymal stem cell	s57	1.18884	Muscle	DiCo	144
macrophage	s57	0.460093	Muscle	DiCo	144
B cell	s57	0.253543	Muscle	DiCo	144
endothelial cell	s57	0.145635	Muscle	DiCo	144
T cell	s57	0.152067	Muscle	DiCo	144
skeletal muscle satellite cell	s58	1.90665	Muscle	DiCo	232
mesenchymal stem cell	s58	0.998491	Muscle	DiCo	232
macrophage	s58	0.425564	Muscle	DiCo	232
B cell	s58	0.27269	Muscle	DiCo	232
endothelial cell	s58	0.0967836	Muscle	DiCo	232
T cell	s58	0.120837	Muscle	DiCo	232
skeletal muscle satellite cell	s59	1.97838	Muscle	DiCo	303
mesenchymal stem cell	s59	0.643455	Muscle	DiCo	303
macrophage	s59	0.321937	Muscle	DiCo	303
B cell	s59	0.239266	Muscle	DiCo	303
endothelial cell	s59	0.365572	Muscle	DiCo	303
T cell	s59	0.128638	Muscle	DiCo	303
skeletal muscle satellite cell	s60	1.9536	Muscle	DiCo	649
mesenchymal stem cell	s60	0.590968	Muscle	DiCo	649
macrophage	s60	0.241984	Muscle	DiCo	649
B cell	s60	0.283194	Muscle	DiCo	649
endothelial cell	s60	0.356266	Muscle	DiCo	649
T cell	s60	0.172072	Muscle	DiCo	649
skeletal muscle satellite cell	s61	1.97188	Muscle	DiCo	654
mesenchymal stem cell	s61	0.502385	Muscle	DiCo	654
macrophage	s61	0.255535	Muscle	DiCo	654
B cell	s61	0.295297	Muscle	DiCo	654
endothelial cell	s61	0.35494	Muscle	DiCo	654
T cell	s61	0.162892	Muscle	DiCo	654
skeletal muscle satellite cell	s62	1.6867	Muscle	DiCo	904
mesenchymal stem cell	s62	0.946591	Muscle	DiCo	904
macrophage	s62	0.468134	Muscle	DiCo	904
B cell	s62	0.60295	Muscle	DiCo	904
endothelial cell	s62	0.038417	Muscle	DiCo	904
T cell	s62	0.191361	Muscle	DiCo	904
skeletal muscle satellite cell	s63	1.71665	Muscle	DiCo	904
mesenchymal stem cell	s63	0.847574	Muscle	DiCo	904
macrophage	s63	0.390562	Muscle	DiCo	904
B cell	s63	0.339125	Muscle	DiCo	904
endothelial cell	s63	0.337231	Muscle	DiCo	904
T cell	s63	0.12771	Muscle	DiCo	904
neuron	s1	1.17785	Cortex	Non-DiCo	2
oligodendrocyte	s1	0.514222	Cortex	Non-DiCo	2
interneuron	s1	0.966636	Cortex	Non-DiCo	2
astrocyte	s1	0.334191	Cortex	Non-DiCo	2
medium spiny neuron	s1	0.467068	Cortex	Non-DiCo	2
endothelial cell	s1	0.712354	Cortex	Non-DiCo	2
oligodendrocyte precursor cell	s1	0.460563	Cortex	Non-DiCo	2
neuronal stem cell	s1	1.22658	Cortex	Non-DiCo	2
brain pericyte	s1	0.0754148	Cortex	Non-DiCo	2
T cell	s1	0.0442927	Cortex	Non-DiCo	2
Bergmann glial cell	s1	-0.0386394	Cortex	Non-DiCo	2
mature NK T cell	s1	-0.00984838	Cortex	Non-DiCo	2
ependymal cell	s1	-0.0140173	Cortex	Non-DiCo	2
CD8-positive, alpha-beta T cell	s1	-0.00825291	Cortex	Non-DiCo	2
neuroepithelial cell	s1	-0.0424992	Cortex	Non-DiCo	2
neuron	s2	1.14103	Cortex	Non-DiCo	2
oligodendrocyte	s2	0.516886	Cortex	Non-DiCo	2
interneuron	s2	0.99787	Cortex	Non-DiCo	2
astrocyte	s2	0.37176	Cortex	Non-DiCo	2
medium spiny neuron	s2	0.461259	Cortex	Non-DiCo	2
endothelial cell	s2	0.716685	Cortex	Non-DiCo	2
oligodendrocyte precursor cell	s2	0.457463	Cortex	Non-DiCo	2
neuronal stem cell	s2	1.12261	Cortex	Non-DiCo	2
brain pericyte	s2	0.134142	Cortex	Non-DiCo	2
T cell	s2	0.0598907	Cortex	Non-DiCo	2
Bergmann glial cell	s2	-0.0334649	Cortex	Non-DiCo	2
mature NK T cell	s2	-0.0129706	Cortex	Non-DiCo	2
ependymal cell	s2	-0.029334	Cortex	Non-DiCo	2
CD8-positive, alpha-beta T cell	s2	-0.0201408	Cortex	Non-DiCo	2
neuroepithelial cell	s2	-0.0510685	Cortex	Non-DiCo	2
neuron	s3	1.23782	Cortex	Non-DiCo	5
oligodendrocyte	s3	0.55768	Cortex	Non-DiCo	5
interneuron	s3	0.969836	Cortex	Non-DiCo	5
astrocyte	s3	0.500387	Cortex	Non-DiCo	5
medium spiny neuron	s3	0.511305	Cortex	Non-DiCo	5
endothelial cell	s3	0.65486	Cortex	Non-DiCo	5
oligodendrocyte precursor cell	s3	0.502904	Cortex	Non-DiCo	5
neuronal stem cell	s3	0.958753	Cortex	Non-DiCo	5
brain pericyte	s3	0.119764	Cortex	Non-DiCo	5
T cell	s3	0.0459684	Cortex	Non-DiCo	5
Bergmann glial cell	s3	-0.0238025	Cortex	Non-DiCo	5
mature NK T cell	s3	-0.0106018	Cortex	Non-DiCo	5
ependymal cell	s3	-0.0157263	Cortex	Non-DiCo	5
CD8-positive, alpha-beta T cell	s3	-0.0239819	Cortex	Non-DiCo	5
neuroepithelial cell	s3	-0.0483879	Cortex	Non-DiCo	5
neuron	s4	1.31417	Cortex	Non-DiCo	11
oligodendrocyte	s4	0.796854	Cortex	Non-DiCo	11
interneuron	s4	0.929515	Cortex	Non-DiCo	11
astrocyte	s4	0.760077	Cortex	Non-DiCo	11
medium spiny neuron	s4	0.634403	Cortex	Non-DiCo	11
endothelial cell	s4	0.581806	Cortex	Non-DiCo	11
oligodendrocyte precursor cell	s4	0.486289	Cortex	Non-DiCo	11
neuronal stem cell	s4	0.440855	Cortex	Non-DiCo	11
brain pericyte	s4	0.127251	Cortex	Non-DiCo	11
T cell	s4	0.041729	Cortex	Non-DiCo	11
Bergmann glial cell	s4	-0.00572787	Cortex	Non-DiCo	11
mature NK T cell	s4	-0.00254221	Cortex	Non-DiCo	11
ependymal cell	s4	-0.0346937	Cortex	Non-DiCo	11
CD8-positive, alpha-beta T cell	s4	-0.0399277	Cortex	Non-DiCo	11
neuroepithelial cell	s4	-0.0655603	Cortex	Non-DiCo	11
neuron	s5	1.27386	Cortex	Non-DiCo	20
oligodendrocyte	s5	1.07636	Cortex	Non-DiCo	20
interneuron	s5	0.952387	Cortex	Non-DiCo	20
astrocyte	s5	0.869376	Cortex	Non-DiCo	20
medium spiny neuron	s5	0.736337	Cortex	Non-DiCo	20
endothelial cell	s5	0.6038	Cortex	Non-DiCo	20
oligodendrocyte precursor cell	s5	0.343885	Cortex	Non-DiCo	20
neuronal stem cell	s5	0.104158	Cortex	Non-DiCo	20
brain pericyte	s5	0.152972	Cortex	Non-DiCo	20
T cell	s5	0.0271884	Cortex	Non-DiCo	20
Bergmann glial cell	s5	0.0221535	Cortex	Non-DiCo	20
mature NK T cell	s5	-0.00456114	Cortex	Non-DiCo	20
ependymal cell	s5	-0.0468754	Cortex	Non-DiCo	20
CD8-positive, alpha-beta T cell	s5	-0.0577572	Cortex	Non-DiCo	20
neuroepithelial cell	s5	-0.0791888	Cortex	Non-DiCo	20
neuron	s6	1.29249	Cortex	Non-DiCo	32
oligodendrocyte	s6	1.111	Cortex	Non-DiCo	32
interneuron	s6	0.955899	Cortex	Non-DiCo	32
astrocyte	s6	0.92761	Cortex	Non-DiCo	32
medium spiny neuron	s6	0.719588	Cortex	Non-DiCo	32
endothelial cell	s6	0.627623	Cortex	Non-DiCo	32
oligodendrocyte precursor cell	s6	0.337713	Cortex	Non-DiCo	32
neuronal stem cell	s6	0.0698631	Cortex	Non-DiCo	32
brain pericyte	s6	0.139605	Cortex	Non-DiCo	32
T cell	s6	0.0398716	Cortex	Non-DiCo	32
Bergmann glial cell	s6	0.0433066	Cortex	Non-DiCo	32
mature NK T cell	s6	-0.0039906	Cortex	Non-DiCo	32
ependymal cell	s6	-0.0341915	Cortex	Non-DiCo	32
CD8-positive, alpha-beta T cell	s6	-0.0463856	Cortex	Non-DiCo	32
neuroepithelial cell	s6	-0.0746046	Cortex	Non-DiCo	32
neuron	s7	1.11204	Cortex	Non-DiCo	61
oligodendrocyte	s7	1.17408	Cortex	Non-DiCo	61
interneuron	s7	0.924002	Cortex	Non-DiCo	61
astrocyte	s7	0.958619	Cortex	Non-DiCo	61
medium spiny neuron	s7	0.849778	Cortex	Non-DiCo	61
endothelial cell	s7	0.578314	Cortex	Non-DiCo	61
oligodendrocyte precursor cell	s7	0.293245	Cortex	Non-DiCo	61
neuronal stem cell	s7	0.0579447	Cortex	Non-DiCo	61
brain pericyte	s7	0.168424	Cortex	Non-DiCo	61
T cell	s7	0.0505571	Cortex	Non-DiCo	61
Bergmann glial cell	s7	0.0404717	Cortex	Non-DiCo	61
mature NK T cell	s7	0.00320149	Cortex	Non-DiCo	61
ependymal cell	s7	-0.0145205	Cortex	Non-DiCo	61
CD8-positive, alpha-beta T cell	s7	-0.0385142	Cortex	Non-DiCo	61
neuroepithelial cell	s7	-0.0581349	Cortex	Non-DiCo	61
neuron	s8	1.35799	Cortex	Non-DiCo	93
oligodendrocyte	s8	1.11015	Cortex	Non-DiCo	93
interneuron	s8	0.948007	Cortex	Non-DiCo	93
astrocyte	s8	0.933707	Cortex	Non-DiCo	93
medium spiny neuron	s8	0.725548	Cortex	Non-DiCo	93
endothelial cell	s8	0.610962	Cortex	Non-DiCo	93
oligodendrocyte precursor cell	s8	0.333006	Cortex	Non-DiCo	93
neuronal stem cell	s8	0.00916987	Cortex	Non-DiCo	93
brain pericyte	s8	0.154064	Cortex	Non-DiCo	93
T cell	s8	0.0237593	Cortex	Non-DiCo	93
Bergmann glial cell	s8	0.0364988	Cortex	Non-DiCo	93
mature NK T cell	s8	-0.000173481	Cortex	Non-DiCo	93
ependymal cell	s8	-0.0315463	Cortex	Non-DiCo	93
CD8-positive, alpha-beta T cell	s8	-0.0336547	Cortex	Non-DiCo	93
neuroepithelial cell	s8	-0.0790449	Cortex	Non-DiCo	93
neuron	s9	1.38019	Cortex	Non-DiCo	93
oligodendrocyte	s9	1.0019	Cortex	Non-DiCo	93
interneuron	s9	0.989994	Cortex	Non-DiCo	93
astrocyte	s9	0.934183	Cortex	Non-DiCo	93
medium spiny neuron	s9	0.668715	Cortex	Non-DiCo	93
endothelial cell	s9	0.648432	Cortex	Non-DiCo	93
oligodendrocyte precursor cell	s9	0.352587	Cortex	Non-DiCo	93
neuronal stem cell	s9	0.122063	Cortex	Non-DiCo	93
brain pericyte	s9	0.160985	Cortex	Non-DiCo	93
T cell	s9	0.0385585	Cortex	Non-DiCo	93
Bergmann glial cell	s9	0.05824	Cortex	Non-DiCo	93
mature NK T cell	s9	-0.00563131	Cortex	Non-DiCo	93
ependymal cell	s9	-0.0270853	Cortex	Non-DiCo	93
CD8-positive, alpha-beta T cell	s9	-0.042968	Cortex	Non-DiCo	93
neuroepithelial cell	s9	-0.0664613	Cortex	Non-DiCo	93
neuron	s10	1.30733	Cortex	Non-DiCo	144
oligodendrocyte	s10	1.11086	Cortex	Non-DiCo	144
interneuron	s10	0.943934	Cortex	Non-DiCo	144
astrocyte	s10	0.918798	Cortex	Non-DiCo	144
medium spiny neuron	s10	0.715995	Cortex	Non-DiCo	144
endothelial cell	s10	0.599752	Cortex	Non-DiCo	144
oligodendrocyte precursor cell	s10	0.3299	Cortex	Non-DiCo	144
neuronal stem cell	s10	0.0348139	Cortex	Non-DiCo	144
brain pericyte	s10	0.174045	Cortex	Non-DiCo	144
T cell	s10	0.0496822	Cortex	Non-DiCo	144
Bergmann glial cell	s10	0.0212099	Cortex	Non-DiCo	144
mature NK T cell	s10	0.00834761	Cortex	Non-DiCo	144
ependymal cell	s10	-0.0107204	Cortex	Non-DiCo	144
CD8-positive, alpha-beta T cell	s10	-0.0425725	Cortex	Non-DiCo	144
neuroepithelial cell	s10	-0.0637231	Cortex	Non-DiCo	144
neuron	s11	1.38248	Cortex	Non-DiCo	232
oligodendrocyte	s11	1.1007	Cortex	Non-DiCo	232
interneuron	s11	0.966288	Cortex	Non-DiCo	232
astrocyte	s11	0.882243	Cortex	Non-DiCo	232
medium spiny neuron	s11	0.69444	Cortex	Non-DiCo	232
endothelial cell	s11	0.614544	Cortex	Non-DiCo	232
oligodendrocyte precursor cell	s11	0.34559	Cortex	Non-DiCo	232
neuronal stem cell	s11	0.0515128	Cortex	Non-DiCo	232
brain pericyte	s11	0.160178	Cortex	Non-DiCo	232
T cell	s11	0.0515809	Cortex	Non-DiCo	232
Bergmann glial cell	s11	0.036726	Cortex	Non-DiCo	232
mature NK T cell	s11	0.00379621	Cortex	Non-DiCo	232
ependymal cell	s11	-0.031924	Cortex	Non-DiCo	232
CD8-positive, alpha-beta T cell	s11	-0.0437711	Cortex	Non-DiCo	232
neuroepithelial cell	s11	-0.0642801	Cortex	Non-DiCo	232
neuron	s12	1.26564	Cortex	Non-DiCo	303
oligodendrocyte	s12	1.17014	Cortex	Non-DiCo	303
interneuron	s12	0.917138	Cortex	Non-DiCo	303
astrocyte	s12	0.926302	Cortex	Non-DiCo	303
medium spiny neuron	s12	0.740837	Cortex	Non-DiCo	303
endothelial cell	s12	0.631609	Cortex	Non-DiCo	303
oligodendrocyte precursor cell	s12	0.309457	Cortex	Non-DiCo	303
neuronal stem cell	s12	0.0347262	Cortex	Non-DiCo	303
brain pericyte	s12	0.179563	Cortex	Non-DiCo	303
T cell	s12	0.0627274	Cortex	Non-DiCo	303
Bergmann glial cell	s12	0.0458611	Cortex	Non-DiCo	303
mature NK T cell	s12	0.0105013	Cortex	Non-DiCo	303
ependymal cell	s12	-0.0159257	Cortex	Non-DiCo	303
CD8-positive, alpha-beta T cell	s12	-0.0432428	Cortex	Non-DiCo	303
neuroepithelial cell	s12	-0.0546886	Cortex	Non-DiCo	303
neuron	s13	1.23013	Cortex	Non-DiCo	649
oligodendrocyte	s13	1.20351	Cortex	Non-DiCo	649
interneuron	s13	0.965602	Cortex	Non-DiCo	649
astrocyte	s13	0.953937	Cortex	Non-DiCo	649
medium spiny neuron	s13	0.741638	Cortex	Non-DiCo	649
endothelial cell	s13	0.596052	Cortex	Non-DiCo	649
oligodendrocyte precursor cell	s13	0.324745	Cortex	Non-DiCo	649
neuronal stem cell	s13	-0.00665578	Cortex	Non-DiCo	649
brain pericyte	s13	0.184763	Cortex	Non-DiCo	649
T cell	s13	0.0719974	Cortex	Non-DiCo	649
Bergmann glial cell	s13	0.0493672	Cortex	Non-DiCo	649
mature NK T cell	s13	0.00506782	Cortex	Non-DiCo	649
ependymal cell	s13	-0.0292299	Cortex	Non-DiCo	649
CD8-positive, alpha-beta T cell	s13	-0.0383945	Cortex	Non-DiCo	649
neuroepithelial cell	s13	-0.0707132	Cortex	Non-DiCo	649
neuron	s14	1.19011	Cortex	Non-DiCo	654
oligodendrocyte	s14	1.24461	Cortex	Non-DiCo	654
interneuron	s14	0.958405	Cortex	Non-DiCo	654
astrocyte	s14	0.979839	Cortex	Non-DiCo	654
medium spiny neuron	s14	0.796375	Cortex	Non-DiCo	654
endothelial cell	s14	0.59635	Cortex	Non-DiCo	654
oligodendrocyte precursor cell	s14	0.297863	Cortex	Non-DiCo	654
neuronal stem cell	s14	-0.0400223	Cortex	Non-DiCo	654
brain pericyte	s14	0.168231	Cortex	Non-DiCo	654
T cell	s14	0.0574302	Cortex	Non-DiCo	654
Bergmann glial cell	s14	0.0255848	Cortex	Non-DiCo	654
mature NK T cell	s14	0.00801409	Cortex	Non-DiCo	654
ependymal cell	s14	-0.0185318	Cortex	Non-DiCo	654
CD8-positive, alpha-beta T cell	s14	-0.0297725	Cortex	Non-DiCo	654
neuroepithelial cell	s14	-0.0631911	Cortex	Non-DiCo	654
neuron	s15	1.30934	Cortex	Non-DiCo	904
oligodendrocyte	s15	1.28559	Cortex	Non-DiCo	904
interneuron	s15	0.954665	Cortex	Non-DiCo	904
astrocyte	s15	0.919518	Cortex	Non-DiCo	904
medium spiny neuron	s15	0.665909	Cortex	Non-DiCo	904
endothelial cell	s15	0.574802	Cortex	Non-DiCo	904
oligodendrocyte precursor cell	s15	0.307163	Cortex	Non-DiCo	904
neuronal stem cell	s15	-0.0619968	Cortex	Non-DiCo	904
brain pericyte	s15	0.156601	Cortex	Non-DiCo	904
T cell	s15	0.0904983	Cortex	Non-DiCo	904
Bergmann glial cell	s15	0.0337025	Cortex	Non-DiCo	904
mature NK T cell	s15	0.0183055	Cortex	Non-DiCo	904
ependymal cell	s15	-0.0305145	Cortex	Non-DiCo	904
CD8-positive, alpha-beta T cell	s15	-0.036731	Cortex	Non-DiCo	904
neuroepithelial cell	s15	-0.0676046	Cortex	Non-DiCo	904
bronchial smooth muscle cell	s16	1.75106	Lung	Non-DiCo	2
type II pneumocyte	s16	1.02513	Lung	Non-DiCo	2
fibroblast of lung	s16	0.496763	Lung	Non-DiCo	2
classical monocyte	s16	0.469693	Lung	Non-DiCo	2
adventitial cell	s16	0.603841	Lung	Non-DiCo	2
B cell	s16	0.151832	Lung	Non-DiCo	2
club cell of bronchiole	s16	0.257622	Lung	Non-DiCo	2
vein endothelial cell	s16	0.175586	Lung	Non-DiCo	2
ciliated columnar cell of tracheobronchial tree	s16	0.122696	Lung	Non-DiCo	2
pulmonary interstitial fibroblast	s16	0.30189	Lung	Non-DiCo	2
pericyte cell	s16	0.222428	Lung	Non-DiCo	2
CD8-positive, alpha-beta T cell	s16	0.0818838	Lung	Non-DiCo	2
dendritic cell	s16	0.10401	Lung	Non-DiCo	2
myeloid dendritic cell	s16	0.119918	Lung	Non-DiCo	2
smooth muscle cell of the pulmonary artery	s16	0.114809	Lung	Non-DiCo	2
respiratory basal cell	s16	0.12706	Lung	Non-DiCo	2
endothelial cell of lymphatic vessel	s16	0.131128	Lung	Non-DiCo	2
non-classical monocyte	s16	0.0924355	Lung	Non-DiCo	2
NK cell	s16	0.0414248	Lung	Non-DiCo	2
CD4-positive, alpha-beta T cell	s16	0.0800597	Lung	Non-DiCo	2
leukocyte	s16	0.0541179	Lung	Non-DiCo	2
neutrophil	s16	0.000185968	Lung	Non-DiCo	2
T cell	s16	0.0420606	Lung	Non-DiCo	2
regulatory T cell	s16	-0.0268568	Lung	Non-DiCo	2
bronchial smooth muscle cell	s17	1.85294	Lung	Non-DiCo	2
type II pneumocyte	s17	0.963707	Lung	Non-DiCo	2
fibroblast of lung	s17	0.477688	Lung	Non-DiCo	2
classical monocyte	s17	0.443455	Lung	Non-DiCo	2
adventitial cell	s17	0.638192	Lung	Non-DiCo	2
B cell	s17	0.15139	Lung	Non-DiCo	2
club cell of bronchiole	s17	0.25467	Lung	Non-DiCo	2
vein endothelial cell	s17	0.181599	Lung	Non-DiCo	2
ciliated columnar cell of tracheobronchial tree	s17	0.133773	Lung	Non-DiCo	2
pulmonary interstitial fibroblast	s17	0.334084	Lung	Non-DiCo	2
pericyte cell	s17	0.230758	Lung	Non-DiCo	2
CD8-positive, alpha-beta T cell	s17	0.0684472	Lung	Non-DiCo	2
dendritic cell	s17	0.0785123	Lung	Non-DiCo	2
myeloid dendritic cell	s17	0.121058	Lung	Non-DiCo	2
smooth muscle cell of the pulmonary artery	s17	0.123261	Lung	Non-DiCo	2
respiratory basal cell	s17	0.112634	Lung	Non-DiCo	2
endothelial cell of lymphatic vessel	s17	0.14364	Lung	Non-DiCo	2
non-classical monocyte	s17	0.134993	Lung	Non-DiCo	2
NK cell	s17	0.0340337	Lung	Non-DiCo	2
CD4-positive, alpha-beta T cell	s17	0.122447	Lung	Non-DiCo	2
[truncated: 596 more rows]

## Sheet: sdata5
tissue	cell type	period	Perms	perm	cols
Cortex	ependymal cell	Ageing	-0.155691	perm1	ependymal cell_Ageing
Cortex	ependymal cell	Development	-0.270281	perm1	ependymal cell_Development
Cortex	astrocyte	Ageing	0.407193	perm1	astrocyte_Ageing
Cortex	astrocyte	Development	0.991031	perm1	astrocyte_Development
Cortex	oligodendrocyte	Ageing	0.910196	perm1	oligodendrocyte_Ageing
Cortex	oligodendrocyte	Development	0.991031	perm1	oligodendrocyte_Development
Cortex	endothelial cell	Ageing	-0.491027	perm1	endothelial cell_Ageing
Cortex	endothelial cell	Development	-0.882919	perm1	endothelial cell_Development
Cortex	neuron	Ageing	-0.646718	perm1	neuron_Ageing
Cortex	neuron	Development	0.630656	perm1	neuron_Development
Cortex	medium spiny neuron	Ageing	0.179644	perm1	medium spiny neuron_Ageing
Cortex	medium spiny neuron	Development	0.954994	perm1	medium spiny neuron_Development
Cortex	interneuron	Ageing	0.622766	perm1	interneuron_Ageing
Cortex	interneuron	Development	-0.612637	perm1	interneuron_Development
Cortex	oligodendrocyte precursor cell	Ageing	-0.718576	perm1	oligodendrocyte precursor cell_Ageing
Cortex	oligodendrocyte precursor cell	Development	-0.702731	perm1	oligodendrocyte precursor cell_Development
Cortex	neuronal stem cell	Ageing	-0.790433	perm1	neuronal stem cell_Ageing
Cortex	neuronal stem cell	Development	-0.991031	perm1	neuronal stem cell_Development
Cortex	Bergmann glial cell	Ageing	-0.395217	perm1	Bergmann glial cell_Ageing
Cortex	Bergmann glial cell	Development	0.991031	perm1	Bergmann glial cell_Development
Cortex	brain pericyte	Ageing	0.682647	perm1	brain pericyte_Ageing
Cortex	brain pericyte	Development	-0.486506	perm1	brain pericyte_Development
Cortex	CD8-positive, alpha-beta T cell	Ageing	0.766481	perm1	CD8-positive, alpha-beta T cell_Ageing
Cortex	CD8-positive, alpha-beta T cell	Development	-0.666694	perm1	CD8-positive, alpha-beta T cell_Development
Cortex	mature NK T cell	Ageing	0	perm1	mature NK T cell_Ageing
Cortex	mature NK T cell	Development	0.756787	perm1	mature NK T cell_Development
Cortex	neuroepithelial cell	Ageing	-0.311383	perm1	neuroepithelial cell_Ageing
Cortex	neuroepithelial cell	Development	-0.774806	perm1	neuroepithelial cell_Development
Cortex	T cell	Ageing	0.838338	perm1	T cell_Ageing
Cortex	T cell	Development	-0.504525	perm1	T cell_Development
Cortex	ependymal cell	Ageing	0.203596	perm2	ependymal cell_Ageing
Cortex	ependymal cell	Development	-0.414431	perm2	ependymal cell_Development
Cortex	astrocyte	Ageing	0.299407	perm2	astrocyte_Ageing
Cortex	astrocyte	Development	0.954994	perm2	astrocyte_Development
Cortex	oligodendrocyte	Ageing	0.970077	perm2	oligodendrocyte_Ageing
Cortex	oligodendrocyte	Development	0.991031	perm2	oligodendrocyte_Development
Cortex	endothelial cell	Ageing	-0.203596	perm2	endothelial cell_Ageing
Cortex	endothelial cell	Development	-0.846881	perm2	endothelial cell_Development
Cortex	neuron	Ageing	-0.598813	perm2	neuron_Ageing
Cortex	neuron	Development	0.774806	perm2	neuron_Development
Cortex	medium spiny neuron	Ageing	0.203596	perm2	medium spiny neuron_Ageing
Cortex	medium spiny neuron	Development	0.954994	perm2	medium spiny neuron_Development
Cortex	interneuron	Ageing	0.814386	perm2	interneuron_Ageing
Cortex	interneuron	Development	0.486506	perm2	interneuron_Development
Cortex	oligodendrocyte precursor cell	Ageing	-0.766481	perm2	oligodendrocyte precursor cell_Ageing
Cortex	oligodendrocyte precursor cell	Development	-0.702731	perm2	oligodendrocyte precursor cell_Development
Cortex	neuronal stem cell	Ageing	-0.790433	perm2	neuronal stem cell_Ageing
Cortex	neuronal stem cell	Development	-0.991031	perm2	neuronal stem cell_Development
Cortex	Bergmann glial cell	Ageing	-0.347312	perm2	Bergmann glial cell_Ageing
Cortex	Bergmann glial cell	Development	0.936975	perm2	Bergmann glial cell_Development
Cortex	brain pericyte	Ageing	-0.0718576	perm2	brain pericyte_Ageing
Cortex	brain pericyte	Development	-0.522544	perm2	brain pericyte_Development
Cortex	CD8-positive, alpha-beta T cell	Ageing	0.119763	perm2	CD8-positive, alpha-beta T cell_Ageing
Cortex	CD8-positive, alpha-beta T cell	Development	-0.882919	perm2	CD8-positive, alpha-beta T cell_Development
Cortex	mature NK T cell	Ageing	0.718576	perm2	mature NK T cell_Ageing
Cortex	mature NK T cell	Development	0.900937	perm2	mature NK T cell_Development
Cortex	neuroepithelial cell	Ageing	0.694623	perm2	neuroepithelial cell_Ageing
Cortex	neuroepithelial cell	Development	-0.882919	perm2	neuroepithelial cell_Development
Cortex	T cell	Ageing	0.874267	perm2	T cell_Ageing
Cortex	T cell	Development	0.2883	perm2	T cell_Development
Cortex	ependymal cell	Ageing	0.143715	perm3	ependymal cell_Ageing
Cortex	ependymal cell	Development	0.198206	perm3	ependymal cell_Development
Cortex	astrocyte	Ageing	0.0359288	perm3	astrocyte_Ageing
Cortex	astrocyte	Development	0.991031	perm3	astrocyte_Development
Cortex	oligodendrocyte	Ageing	0.874267	perm3	oligodendrocyte_Ageing
Cortex	oligodendrocyte	Development	0.991031	perm3	oligodendrocyte_Development
Cortex	endothelial cell	Ageing	-0.407193	perm3	endothelial cell_Ageing
Cortex	endothelial cell	Development	-0.954994	perm3	endothelial cell_Development
Cortex	neuron	Ageing	-0.646718	perm3	neuron_Ageing
Cortex	neuron	Development	0.2883	perm3	neuron_Development
Cortex	medium spiny neuron	Ageing	0.179644	perm3	medium spiny neuron_Ageing
Cortex	medium spiny neuron	Development	0.991031	perm3	medium spiny neuron_Development
Cortex	interneuron	Ageing	0.107786	perm3	interneuron_Ageing
Cortex	interneuron	Development	-0.0180187	perm3	interneuron_Development
Cortex	oligodendrocyte precursor cell	Ageing	-0.467074	perm3	oligodendrocyte precursor cell_Ageing
Cortex	oligodendrocyte precursor cell	Development	-0.702731	perm3	oligodendrocyte precursor cell_Development
Cortex	neuronal stem cell	Ageing	-0.790433	perm3	neuronal stem cell_Ageing
Cortex	neuronal stem cell	Development	-0.954994	perm3	neuronal stem cell_Development
Cortex	Bergmann glial cell	Ageing	-0.586837	perm3	Bergmann glial cell_Ageing
Cortex	Bergmann glial cell	Development	0.882919	perm3	Bergmann glial cell_Development
Cortex	brain pericyte	Ageing	0.634742	perm3	brain pericyte_Ageing
Cortex	brain pericyte	Development	0.072075	perm3	brain pericyte_Development
Cortex	CD8-positive, alpha-beta T cell	Ageing	0.275454	perm3	CD8-positive, alpha-beta T cell_Ageing
Cortex	CD8-positive, alpha-beta T cell	Development	-0.738769	perm3	CD8-positive, alpha-beta T cell_Development
Cortex	mature NK T cell	Ageing	0.778457	perm3	mature NK T cell_Ageing
Cortex	mature NK T cell	Development	-0.0900937	perm3	mature NK T cell_Development
Cortex	neuroepithelial cell	Ageing	0.155691	perm3	neuroepithelial cell_Ageing
Cortex	neuroepithelial cell	Development	-0.828862	perm3	neuroepithelial cell_Development
Cortex	T cell	Ageing	0.850315	perm3	T cell_Ageing
Cortex	T cell	Development	-0.0540562	perm3	T cell_Development
Cortex	ependymal cell	Ageing	0	perm4	ependymal cell_Ageing
Cortex	ependymal cell	Development	0.0900937	perm4	ependymal cell_Development
Cortex	astrocyte	Ageing	-0.0838338	perm4	astrocyte_Ageing
Cortex	astrocyte	Development	0.991031	perm4	astrocyte_Development
Cortex	oligodendrocyte	Ageing	0.970077	perm4	oligodendrocyte_Ageing
Cortex	oligodendrocyte	Development	0.991031	perm4	oligodendrocyte_Development
Cortex	endothelial cell	Ageing	-0.550908	perm4	endothelial cell_Ageing
Cortex	endothelial cell	Development	-0.991031	perm4	endothelial cell_Development
Cortex	neuron	Ageing	-0.766481	perm4	neuron_Ageing
Cortex	neuron	Development	0.198206	perm4	neuron_Development
Cortex	medium spiny neuron	Ageing	0.335335	perm4	medium spiny neuron_Ageing
Cortex	medium spiny neuron	Development	0.954994	perm4	medium spiny neuron_Development
Cortex	interneuron	Ageing	-0.0718576	perm4	interneuron_Ageing
Cortex	interneuron	Development	0.828862	perm4	interneuron_Development
Cortex	oligodendrocyte precursor cell	Ageing	-0.89822	perm4	oligodendrocyte precursor cell_Ageing
Cortex	oligodendrocyte precursor cell	Development	-0.882919	perm4	oligodendrocyte precursor cell_Development
Cortex	neuronal stem cell	Ageing	-0.742528	perm4	neuronal stem cell_Ageing
Cortex	neuronal stem cell	Development	-0.991031	perm4	neuronal stem cell_Development
Cortex	Bergmann glial cell	Ageing	0.0718576	perm4	Bergmann glial cell_Ageing
Cortex	Bergmann glial cell	Development	0.991031	perm4	Bergmann glial cell_Development
Cortex	brain pericyte	Ageing	0.263478	perm4	brain pericyte_Ageing
Cortex	brain pericyte	Development	-0.0360375	perm4	brain pericyte_Development
Cortex	CD8-positive, alpha-beta T cell	Ageing	0.335335	perm4	CD8-positive, alpha-beta T cell_Ageing
Cortex	CD8-positive, alpha-beta T cell	Development	-0.738769	perm4	CD8-positive, alpha-beta T cell_Development
Cortex	mature NK T cell	Ageing	0.0598813	perm4	mature NK T cell_Ageing
Cortex	mature NK T cell	Development	0.684712	perm4	mature NK T cell_Development
Cortex	neuroepithelial cell	Ageing	0.335335	perm4	neuroepithelial cell_Ageing
Cortex	neuroepithelial cell	Development	-0.666694	perm4	neuroepithelial cell_Development
Cortex	T cell	Ageing	0.99403	perm4	T cell_Ageing
Cortex	T cell	Development	-0.14415	perm4	T cell_Development
Cortex	ependymal cell	Ageing	-0.0359288	perm5	ependymal cell_Ageing
Cortex	ependymal cell	Development	-0.414431	perm5	ependymal cell_Development
Cortex	astrocyte	Ageing	0.371264	perm5	astrocyte_Ageing
Cortex	astrocyte	Development	0.991031	perm5	astrocyte_Development
Cortex	oligodendrocyte	Ageing	0.958101	perm5	oligodendrocyte_Ageing
Cortex	oligodendrocyte	Development	0.991031	perm5	oligodendrocyte_Development
Cortex	endothelial cell	Ageing	-0.622766	perm5	endothelial cell_Ageing
Cortex	endothelial cell	Development	-0.810844	perm5	endothelial cell_Development
Cortex	neuron	Ageing	-0.646718	perm5	neuron_Ageing
Cortex	neuron	Development	0.630656	perm5	neuron_Development
Cortex	medium spiny neuron	Ageing	0.179644	perm5	medium spiny neuron_Ageing
Cortex	medium spiny neuron	Development	0.954994	perm5	medium spiny neuron_Development
Cortex	interneuron	Ageing	0.263478	perm5	interneuron_Ageing
Cortex	interneuron	Development	-0.702731	perm5	interneuron_Development
Cortex	oligodendrocyte precursor cell	Ageing	-0.251502	perm5	oligodendrocyte precursor cell_Ageing
Cortex	oligodendrocyte precursor cell	Development	-0.666694	perm5	oligodendrocyte precursor cell_Development
Cortex	neuronal stem cell	Ageing	-0.742528	perm5	neuronal stem cell_Ageing
Cortex	neuronal stem cell	Development	-0.991031	perm5	neuronal stem cell_Development
Cortex	Bergmann glial cell	Ageing	-0.371264	perm5	Bergmann glial cell_Ageing
Cortex	Bergmann glial cell	Development	0.882919	perm5	Bergmann glial cell_Development
Cortex	brain pericyte	Ageing	0.0958101	perm5	brain pericyte_Ageing
Cortex	brain pericyte	Development	-0.108112	perm5	brain pericyte_Development
Cortex	CD8-positive, alpha-beta T cell	Ageing	0.682647	perm5	CD8-positive, alpha-beta T cell_Ageing
Cortex	CD8-positive, alpha-beta T cell	Development	-0.846881	perm5	CD8-positive, alpha-beta T cell_Development
Cortex	mature NK T cell	Ageing	0.622766	perm5	mature NK T cell_Ageing
Cortex	mature NK T cell	Development	-0.072075	perm5	mature NK T cell_Development
Cortex	neuroepithelial cell	Ageing	0.395217	perm5	neuroepithelial cell_Ageing
Cortex	neuroepithelial cell	Development	-0.8649	perm5	neuroepithelial cell_Development
Cortex	T cell	Ageing	0.946125	perm5	T cell_Ageing
Cortex	T cell	Development	0.0900937	perm5	T cell_Development
Cortex	ependymal cell	Ageing	0.239525	perm6	ependymal cell_Ageing
Cortex	ependymal cell	Development	0.0900937	perm6	ependymal cell_Development
Cortex	astrocyte	Ageing	0.395217	perm6	astrocyte_Ageing
Cortex	astrocyte	Development	0.991031	perm6	astrocyte_Development
Cortex	oligodendrocyte	Ageing	0.99403	perm6	oligodendrocyte_Ageing
Cortex	oligodendrocyte	Development	0.991031	perm6	oligodendrocyte_Development
Cortex	endothelial cell	Ageing	-0.479051	perm6	endothelial cell_Ageing
Cortex	endothelial cell	Development	-0.991031	perm6	endothelial cell_Development
Cortex	neuron	Ageing	-0.646718	perm6	neuron_Ageing
Cortex	neuron	Development	0.630656	perm6	neuron_Development
Cortex	medium spiny neuron	Ageing	0.179644	perm6	medium spiny neuron_Ageing
Cortex	medium spiny neuron	Development	0.954994	perm6	medium spiny neuron_Development
Cortex	interneuron	Ageing	0.335335	perm6	interneuron_Ageing
Cortex	interneuron	Development	0.828862	perm6	interneuron_Development
Cortex	oligodendrocyte precursor cell	Ageing	-0.766481	perm6	oligodendrocyte precursor cell_Ageing
Cortex	oligodendrocyte precursor cell	Development	-0.792825	perm6	oligodendrocyte precursor cell_Development
Cortex	neuronal stem cell	Ageing	-0.742528	perm6	neuronal stem cell_Ageing
Cortex	neuronal stem cell	Development	-0.991031	perm6	neuronal stem cell_Development
Cortex	Bergmann glial cell	Ageing	-0.38324	perm6	Bergmann glial cell_Ageing
Cortex	Bergmann glial cell	Development	0.954994	perm6	Bergmann glial cell_Development
Cortex	brain pericyte	Ageing	0.455098	perm6	brain pericyte_Ageing
Cortex	brain pericyte	Development	-0.270281	perm6	brain pericyte_Development
Cortex	CD8-positive, alpha-beta T cell	Ageing	0.359288	perm6	CD8-positive, alpha-beta T cell_Ageing
Cortex	CD8-positive, alpha-beta T cell	Development	-0.198206	perm6	CD8-positive, alpha-beta T cell_Development
Cortex	mature NK T cell	Ageing	0.562884	perm6	mature NK T cell_Ageing
Cortex	mature NK T cell	Development	-0.450469	perm6	mature NK T cell_Development
Cortex	neuroepithelial cell	Ageing	-0.239525	perm6	neuroepithelial cell_Ageing
Cortex	neuroepithelial cell	Development	-0.738769	perm6	neuroepithelial cell_Development
Cortex	T cell	Ageing	0.89822	perm6	T cell_Ageing
Cortex	T cell	Development	0.0540562	perm6	T cell_Development
Cortex	ependymal cell	Ageing	0.299407	perm7	ependymal cell_Ageing
Cortex	ependymal cell	Development	-0.684712	perm7	ependymal cell_Development
Cortex	astrocyte	Ageing	-0.0119763	perm7	astrocyte_Ageing
Cortex	astrocyte	Development	0.991031	perm7	astrocyte_Development
Cortex	oligodendrocyte	Ageing	0.910196	perm7	oligodendrocyte_Ageing
Cortex	oligodendrocyte	Development	0.991031	perm7	oligodendrocyte_Development
Cortex	endothelial cell	Ageing	-0.28743	perm7	endothelial cell_Ageing
Cortex	endothelial cell	Development	-0.666694	perm7	endothelial cell_Development
Cortex	neuron	Ageing	-0.706599	perm7	neuron_Ageing
Cortex	neuron	Development	0.522544	perm7	neuron_Development
Cortex	medium spiny neuron	Ageing	0.227549	perm7	medium spiny neuron_Ageing
Cortex	medium spiny neuron	Development	0.954994	perm7	medium spiny neuron_Development
Cortex	interneuron	Ageing	0.359288	perm7	interneuron_Ageing
Cortex	interneuron	Development	-0.180187	perm7	interneuron_Development
Cortex	oligodendrocyte precursor cell	Ageing	-0.730552	perm7	oligodendrocyte precursor cell_Ageing
Cortex	oligodendrocyte precursor cell	Development	-0.792825	perm7	oligodendrocyte precursor cell_Development
Cortex	neuronal stem cell	Ageing	-0.790433	perm7	neuronal stem cell_Ageing
Cortex	neuronal stem cell	Development	-0.991031	perm7	neuronal stem cell_Development
Cortex	Bergmann glial cell	Ageing	-0.311383	perm7	Bergmann glial cell_Ageing
Cortex	Bergmann glial cell	Development	0.594619	perm7	Bergmann glial cell_Development
Cortex	brain pericyte	Ageing	0.107786	perm7	brain pericyte_Ageing
Cortex	brain pericyte	Development	-0.900937	perm7	brain pericyte_Development
Cortex	CD8-positive, alpha-beta T cell	Ageing	0.538932	perm7	CD8-positive, alpha-beta T cell_Ageing
Cortex	CD8-positive, alpha-beta T cell	Development	-0.252262	perm7	CD8-positive, alpha-beta T cell_Development
Cortex	mature NK T cell	Ageing	0.347312	perm7	mature NK T cell_Ageing
Cortex	mature NK T cell	Development	0.612637	perm7	mature NK T cell_Development
Cortex	neuroepithelial cell	Ageing	0.455098	perm7	neuroepithelial cell_Ageing
Cortex	neuroepithelial cell	Development	0	perm7	neuroepithelial cell_Development
Cortex	T cell	Ageing	0.922172	perm7	T cell_Ageing
Cortex	T cell	Development	-0.396412	perm7	T cell_Development
Cortex	ependymal cell	Ageing	0.503003	perm8	ependymal cell_Ageing
Cortex	ependymal cell	Development	-0.0180187	perm8	ependymal cell_Development
Cortex	astrocyte	Ageing	0.622766	perm8	astrocyte_Ageing
Cortex	astrocyte	Development	0.991031	perm8	astrocyte_Development
Cortex	oligodendrocyte	Ageing	0.99403	perm8	oligodendrocyte_Ageing
Cortex	oligodendrocyte	Development	0.991031	perm8	oligodendrocyte_Development
Cortex	endothelial cell	Ageing	-0.622766	perm8	endothelial cell_Ageing
Cortex	endothelial cell	Development	-0.900937	perm8	endothelial cell_Development
Cortex	neuron	Ageing	-0.706599	perm8	neuron_Ageing
Cortex	neuron	Development	0.630656	perm8	neuron_Development
Cortex	medium spiny neuron	Ageing	-0.0119763	perm8	medium spiny neuron_Ageing
Cortex	medium spiny neuron	Development	0.954994	perm8	medium spiny neuron_Development
Cortex	interneuron	Ageing	0.610789	perm8	interneuron_Ageing
Cortex	interneuron	Development	0.2883	perm8	interneuron_Development
Cortex	oligodendrocyte precursor cell	Ageing	-0.359288	perm8	oligodendrocyte precursor cell_Ageing
Cortex	oligodendrocyte precursor cell	Development	-0.666694	perm8	oligodendrocyte precursor cell_Development
Cortex	neuronal stem cell	Ageing	-0.790433	perm8	neuronal stem cell_Ageing
Cortex	neuronal stem cell	Development	-0.991031	perm8	neuronal stem cell_Development
Cortex	Bergmann glial cell	Ageing	-0.562884	perm8	Bergmann glial cell_Ageing
Cortex	Bergmann glial cell	Development	0.882919	perm8	Bergmann glial cell_Development
Cortex	brain pericyte	Ageing	0.562884	perm8	brain pericyte_Ageing
Cortex	brain pericyte	Development	-0.072075	perm8	brain pericyte_Development
Cortex	CD8-positive, alpha-beta T cell	Ageing	0.359288	perm8	CD8-positive, alpha-beta T cell_Ageing
Cortex	CD8-positive, alpha-beta T cell	Development	-0.666694	perm8	CD8-positive, alpha-beta T cell_Development
Cortex	mature NK T cell	Ageing	0.766481	perm8	mature NK T cell_Ageing
Cortex	mature NK T cell	Development	0.774806	perm8	mature NK T cell_Development
Cortex	neuroepithelial cell	Ageing	0.80241	perm8	neuroepithelial cell_Ageing
Cortex	neuroepithelial cell	Development	-0.378394	perm8	neuroepithelial cell_Development
Cortex	T cell	Ageing	0.89822	perm8	T cell_Ageing
Cortex	T cell	Development	-0.684712	perm8	T cell_Development
Cortex	ependymal cell	Ageing	0.0479051	perm9	ependymal cell_Ageing
Cortex	ependymal cell	Development	-0.270281	perm9	ependymal cell_Development
Cortex	astrocyte	Ageing	0.778457	perm9	astrocyte_Ageing
Cortex	astrocyte	Development	0.991031	perm9	astrocyte_Development
Cortex	oligodendrocyte	Ageing	0.970077	perm9	oligodendrocyte_Ageing
Cortex	oligodendrocyte	Development	0.991031	perm9	oligodendrocyte_Development
Cortex	endothelial cell	Ageing	-0.347312	perm9	endothelial cell_Ageing
Cortex	endothelial cell	Development	-0.702731	perm9	endothelial cell_Development
Cortex	neuron	Ageing	-0.586837	perm9	neuron_Ageing
Cortex	neuron	Development	0.396412	perm9	neuron_Development
Cortex	medium spiny neuron	Ageing	0.335335	perm9	medium spiny neuron_Ageing
Cortex	medium spiny neuron	Development	0.954994	perm9	medium spiny neuron_Development
Cortex	interneuron	Ageing	-0.443122	perm9	interneuron_Ageing
Cortex	interneuron	Development	-0.900937	perm9	interneuron_Development
Cortex	oligodendrocyte precursor cell	Ageing	-0.766481	perm9	oligodendrocyte precursor cell_Ageing
Cortex	oligodendrocyte precursor cell	Development	-0.882919	perm9	oligodendrocyte precursor cell_Development
Cortex	neuronal stem cell	Ageing	-0.742528	perm9	neuronal stem cell_Ageing
Cortex	neuronal stem cell	Development	-0.954994	perm9	neuronal stem cell_Development
Cortex	Bergmann glial cell	Ageing	-0.610789	perm9	Bergmann glial cell_Ageing
Cortex	Bergmann glial cell	Development	0.882919	perm9	Bergmann glial cell_Development
Cortex	brain pericyte	Ageing	0.419169	perm9	brain pericyte_Ageing
Cortex	brain pericyte	Development	-0.180187	perm9	brain pericyte_Development
Cortex	CD8-positive, alpha-beta T cell	Ageing	0.407193	perm9	CD8-positive, alpha-beta T cell_Ageing
Cortex	CD8-positive, alpha-beta T cell	Development	0.846881	perm9	CD8-positive, alpha-beta T cell_Development
Cortex	mature NK T cell	Ageing	0.922172	perm9	mature NK T cell_Ageing
Cortex	mature NK T cell	Development	0.684712	perm9	mature NK T cell_Development
Cortex	neuroepithelial cell	Ageing	0.467074	perm9	neuroepithelial cell_Ageing
Cortex	neuroepithelial cell	Development	-0.954994	perm9	neuroepithelial cell_Development
Cortex	T cell	Ageing	0.89822	perm9	T cell_Ageing
Cortex	T cell	Development	-0.684712	perm9	T cell_Development
Cortex	ependymal cell	Ageing	0.311383	perm10	ependymal cell_Ageing
Cortex	ependymal cell	Development	0.0900937	perm10	ependymal cell_Development
Cortex	astrocyte	Ageing	0.0359288	perm10	astrocyte_Ageing
Cortex	astrocyte	Development	0.954994	perm10	astrocyte_Development
Cortex	oligodendrocyte	Ageing	0.874267	perm10	oligodendrocyte_Ageing
Cortex	oligodendrocyte	Development	0.991031	perm10	oligodendrocyte_Development
Cortex	endothelial cell	Ageing	-0.467074	perm10	endothelial cell_Ageing
Cortex	endothelial cell	Development	-0.954994	perm10	endothelial cell_Development
Cortex	neuron	Ageing	-0.670671	perm10	neuron_Ageing
Cortex	neuron	Development	0.198206	perm10	neuron_Development
Cortex	medium spiny neuron	Ageing	0.335335	perm10	medium spiny neuron_Ageing
Cortex	medium spiny neuron	Development	0.954994	perm10	medium spiny neuron_Development
Cortex	interneuron	Ageing	-0.275454	perm10	interneuron_Ageing
Cortex	interneuron	Development	-0.0180187	perm10	interneuron_Development
Cortex	oligodendrocyte precursor cell	Ageing	-0.38324	perm10	oligodendrocyte precursor cell_Ageing
Cortex	oligodendrocyte precursor cell	Development	-0.666694	perm10	oligodendrocyte precursor cell_Development
Cortex	neuronal stem cell	Ageing	-0.790433	perm10	neuronal stem cell_Ageing
Cortex	neuronal stem cell	Development	-0.991031	perm10	neuronal stem cell_Development
Cortex	Bergmann glial cell	Ageing	-0.19162	perm10	Bergmann glial cell_Ageing
Cortex	Bergmann glial cell	Development	0.991031	perm10	Bergmann glial cell_Development
Cortex	brain pericyte	Ageing	0.143715	perm10	brain pericyte_Ageing
Cortex	brain pericyte	Development	-0.486506	perm10	brain pericyte_Development
Cortex	CD8-positive, alpha-beta T cell	Ageing	0.538932	perm10	CD8-positive, alpha-beta T cell_Ageing
Cortex	CD8-positive, alpha-beta T cell	Development	-0.216225	perm10	CD8-positive, alpha-beta T cell_Development
Cortex	mature NK T cell	Ageing	0.610789	perm10	mature NK T cell_Ageing
Cortex	mature NK T cell	Development	0.810844	perm10	mature NK T cell_Development
Cortex	neuroepithelial cell	Ageing	0.227549	perm10	neuroepithelial cell_Ageing
Cortex	neuroepithelial cell	Development	-0.846881	perm10	neuroepithelial cell_Development
Cortex	T cell	Ageing	0.874267	perm10	T cell_Ageing
Cortex	T cell	Development	-0.468487	perm10	T cell_Development
Cortex	ependymal cell	Ageing	0.323359	perm11	ependymal cell_Ageing
Cortex	ependymal cell	Development	-0.270281	perm11	ependymal cell_Development
Cortex	astrocyte	Ageing	0.431145	perm11	astrocyte_Ageing
Cortex	astrocyte	Development	0.991031	perm11	astrocyte_Development
Cortex	oligodendrocyte	Ageing	0.89822	perm11	oligodendrocyte_Ageing
Cortex	oligodendrocyte	Development	0.991031	perm11	oligodendrocyte_Development
Cortex	endothelial cell	Ageing	-0.622766	perm11	endothelial cell_Ageing
Cortex	endothelial cell	Development	-0.882919	perm11	endothelial cell_Development
Cortex	neuron	Ageing	-0.646718	perm11	neuron_Ageing
Cortex	neuron	Development	0.396412	perm11	neuron_Development
Cortex	medium spiny neuron	Ageing	0.179644	perm11	medium spiny neuron_Ageing
Cortex	medium spiny neuron	Development	0.954994	perm11	medium spiny neuron_Development
Cortex	interneuron	Ageing	0.754505	perm11	interneuron_Ageing
Cortex	interneuron	Development	0.234244	perm11	interneuron_Development
Cortex	oligodendrocyte precursor cell	Ageing	-0.718576	perm11	oligodendrocyte precursor cell_Ageing
Cortex	oligodendrocyte precursor cell	Development	-0.702731	perm11	oligodendrocyte precursor cell_Development
Cortex	neuronal stem cell	Ageing	-0.814386	perm11	neuronal stem cell_Ageing
Cortex	neuronal stem cell	Development	-0.991031	perm11	neuronal stem cell_Development
Cortex	Bergmann glial cell	Ageing	-0.550908	perm11	Bergmann glial cell_Ageing
Cortex	Bergmann glial cell	Development	0.522544	perm11	Bergmann glial cell_Development
Cortex	brain pericyte	Ageing	0.419169	perm11	brain pericyte_Ageing
Cortex	brain pericyte	Development	0.342356	perm11	brain pericyte_Development
Cortex	CD8-positive, alpha-beta T cell	Ageing	0.634742	perm11	CD8-positive, alpha-beta T cell_Ageing
Cortex	CD8-positive, alpha-beta T cell	Development	-0.882919	perm11	CD8-positive, alpha-beta T cell_Development
Cortex	mature NK T cell	Ageing	0.730552	perm11	mature NK T cell_Ageing
Cortex	mature NK T cell	Development	0.702731	perm11	mature NK T cell_Development
Cortex	neuroepithelial cell	Ageing	0.119763	perm11	neuroepithelial cell_Ageing
Cortex	neuroepithelial cell	Development	-0.5766	perm11	neuroepithelial cell_Development
Cortex	T cell	Ageing	0.946125	perm11	T cell_Ageing
Cortex	T cell	Development	0.126131	perm11	T cell_Development
Cortex	ependymal cell	Ageing	0.203596	perm12	ependymal cell_Ageing
Cortex	ependymal cell	Development	0.450469	perm12	ependymal cell_Development
Cortex	astrocyte	Ageing	0.407193	perm12	astrocyte_Ageing
Cortex	astrocyte	Development	0.991031	perm12	astrocyte_Development
Cortex	oligodendrocyte	Ageing	0.874267	perm12	oligodendrocyte_Ageing
Cortex	oligodendrocyte	Development	0.991031	perm12	oligodendrocyte_Development
Cortex	endothelial cell	Ageing	-0.311383	perm12	endothelial cell_Ageing
Cortex	endothelial cell	Development	-0.991031	perm12	endothelial cell_Development
Cortex	neuron	Ageing	-0.766481	perm12	neuron_Ageing
Cortex	neuron	Development	0.198206	perm12	neuron_Development
Cortex	medium spiny neuron	Ageing	0.335335	perm12	medium spiny neuron_Ageing
Cortex	medium spiny neuron	Development	0.954994	perm12	medium spiny neuron_Development
Cortex	interneuron	Ageing	0.526956	perm12	interneuron_Ageing
Cortex	interneuron	Development	0.792825	perm12	interneuron_Development
Cortex	oligodendrocyte precursor cell	Ageing	-0.658694	perm12	oligodendrocyte precursor cell_Ageing
Cortex	oligodendrocyte precursor cell	Development	-0.702731	perm12	oligodendrocyte precursor cell_Development
Cortex	neuronal stem cell	Ageing	-0.790433	perm12	neuronal stem cell_Ageing
Cortex	neuronal stem cell	Development	-0.991031	perm12	neuronal stem cell_Development
Cortex	Bergmann glial cell	Ageing	-0.503003	perm12	Bergmann glial cell_Ageing
Cortex	Bergmann glial cell	Development	0.900937	perm12	Bergmann glial cell_Development
Cortex	brain pericyte	Ageing	0.371264	perm12	brain pericyte_Ageing
Cortex	brain pericyte	Development	0.0900937	perm12	brain pericyte_Development
Cortex	CD8-positive, alpha-beta T cell	Ageing	-0.0239525	perm12	CD8-positive, alpha-beta T cell_Ageing
Cortex	CD8-positive, alpha-beta T cell	Development	-0.702731	perm12	CD8-positive, alpha-beta T cell_Development
Cortex	mature NK T cell	Ageing	0.586837	perm12	mature NK T cell_Ageing
Cortex	mature NK T cell	Development	-0.234244	perm12	mature NK T cell_Development
Cortex	neuroepithelial cell	Ageing	0.562884	perm12	neuroepithelial cell_Ageing
Cortex	neuroepithelial cell	Development	-0.414431	perm12	neuroepithelial cell_Development
Cortex	T cell	Ageing	0.80241	perm12	T cell_Ageing
Cortex	T cell	Development	-0.846881	perm12	T cell_Development
Cortex	ependymal cell	Ageing	0.299407	perm13	ependymal cell_Ageing
Cortex	ependymal cell	Development	0.396412	perm13	ependymal cell_Development
Cortex	astrocyte	Ageing	0.335335	perm13	astrocyte_Ageing
Cortex	astrocyte	Development	0.991031	perm13	astrocyte_Development
Cortex	oligodendrocyte	Ageing	0.874267	perm13	oligodendrocyte_Ageing
Cortex	oligodendrocyte	Development	0.991031	perm13	oligodendrocyte_Development
Cortex	endothelial cell	Ageing	-0.0838338	perm13	endothelial cell_Ageing
Cortex	endothelial cell	Development	-0.846881	perm13	endothelial cell_Development
Cortex	neuron	Ageing	-0.886243	perm13	neuron_Ageing
Cortex	neuron	Development	0.594619	perm13	neuron_Development
Cortex	medium spiny neuron	Ageing	0.0718576	perm13	medium spiny neuron_Ageing
Cortex	medium spiny neuron	Development	0.954994	perm13	medium spiny neuron_Development
Cortex	interneuron	Ageing	0.407193	perm13	interneuron_Ageing
Cortex	interneuron	Development	-0.252262	perm13	interneuron_Development
Cortex	oligodendrocyte precursor cell	Ageing	-0.80241	perm13	oligodendrocyte precursor cell_Ageing
Cortex	oligodendrocyte precursor cell	Development	-0.666694	perm13	oligodendrocyte precursor cell_Development
Cortex	neuronal stem cell	Ageing	-0.742528	perm13	neuronal stem cell_Ageing
Cortex	neuronal stem cell	Development	-0.991031	perm13	neuronal stem cell_Development
Cortex	Bergmann glial cell	Ageing	-0.38324	perm13	Bergmann glial cell_Ageing
Cortex	Bergmann glial cell	Development	0.738769	perm13	Bergmann glial cell_Development
Cortex	brain pericyte	Ageing	0.0598813	perm13	brain pericyte_Ageing
Cortex	brain pericyte	Development	-0.900937	perm13	brain pericyte_Development
Cortex	CD8-positive, alpha-beta T cell	Ageing	0.538932	perm13	CD8-positive, alpha-beta T cell_Ageing
Cortex	CD8-positive, alpha-beta T cell	Development	-0.846881	perm13	CD8-positive, alpha-beta T cell_Development
Cortex	mature NK T cell	Ageing	-0.443122	perm13	mature NK T cell_Ageing
Cortex	mature NK T cell	Development	-0.666694	perm13	mature NK T cell_Development
Cortex	neuroepithelial cell	Ageing	0.131739	perm13	neuroepithelial cell_Ageing
Cortex	neuroepithelial cell	Development	-0.0900937	perm13	neuroepithelial cell_Development
Cortex	T cell	Ageing	0.946125	perm13	T cell_Ageing
Cortex	T cell	Development	-0.738769	perm13	T cell_Development
Cortex	ependymal cell	Ageing	0	perm14	ependymal cell_Ageing
Cortex	ependymal cell	Development	-0.342356	perm14	ependymal cell_Development
Cortex	astrocyte	Ageing	0.323359	perm14	astrocyte_Ageing
Cortex	astrocyte	Development	0.991031	perm14	astrocyte_Development
Cortex	oligodendrocyte	Ageing	0.874267	perm14	oligodendrocyte_Ageing
Cortex	oligodendrocyte	Development	0.991031	perm14	oligodendrocyte_Development
Cortex	endothelial cell	Ageing	-0.634742	perm14	endothelial cell_Ageing
Cortex	endothelial cell	Development	-0.882919	perm14	endothelial cell_Development
Cortex	neuron	Ageing	-0.646718	perm14	neuron_Ageing
Cortex	neuron	Development	0.594619	perm14	neuron_Development
Cortex	medium spiny neuron	Ageing	0.203596	perm14	medium spiny neuron_Ageing
Cortex	medium spiny neuron	Development	0.954994	perm14	medium spiny neuron_Development
Cortex	interneuron	Ageing	0.179644	perm14	interneuron_Ageing
Cortex	interneuron	Development	-0.666694	perm14	interneuron_Development
Cortex	oligodendrocyte precursor cell	Ageing	-0.718576	perm14	oligodendrocyte precursor cell_Ageing
Cortex	oligodendrocyte precursor cell	Development	-0.846881	perm14	oligodendrocyte precursor cell_Development
Cortex	neuronal stem cell	Ageing	-0.790433	perm14	neuronal stem cell_Ageing
Cortex	neuronal stem cell	Development	-0.991031	perm14	neuronal stem cell_Development
Cortex	Bergmann glial cell	Ageing	-0.155691	perm14	Bergmann glial cell_Ageing
Cortex	Bergmann glial cell	Development	0.954994	perm14	Bergmann glial cell_Development
Cortex	brain pericyte	Ageing	0.323359	perm14	brain pericyte_Ageing
Cortex	brain pericyte	Development	-0.684712	perm14	brain pericyte_Development
Cortex	CD8-positive, alpha-beta T cell	Ageing	0.562884	perm14	CD8-positive, alpha-beta T cell_Ageing
Cortex	CD8-positive, alpha-beta T cell	Development	-0.738769	perm14	CD8-positive, alpha-beta T cell_Development
Cortex	mature NK T cell	Ageing	0.407193	perm14	mature NK T cell_Ageing
Cortex	mature NK T cell	Development	-0.522544	perm14	mature NK T cell_Development
Cortex	neuroepithelial cell	Ageing	0.706599	perm14	neuroepithelial cell_Ageing
Cortex	neuroepithelial cell	Development	-0.684712	perm14	neuroepithelial cell_Development
Cortex	T cell	Ageing	0.826362	perm14	T cell_Ageing
Cortex	T cell	Development	0.810844	perm14	T cell_Development
Cortex	ependymal cell	Ageing	0	perm15	ependymal cell_Ageing
Cortex	ependymal cell	Development	-0.270281	perm15	ependymal cell_Development
Cortex	astrocyte	Ageing	0.227549	perm15	astrocyte_Ageing
Cortex	astrocyte	Development	0.991031	perm15	astrocyte_Development
Cortex	oligodendrocyte	Ageing	0.910196	perm15	oligodendrocyte_Ageing
Cortex	oligodendrocyte	Development	0.991031	perm15	oligodendrocyte_Development
Cortex	endothelial cell	Ageing	-0.503003	perm15	endothelial cell_Ageing
Cortex	endothelial cell	Development	-0.991031	perm15	endothelial cell_Development
Cortex	neuron	Ageing	-0.646718	perm15	neuron_Ageing
Cortex	neuron	Development	0.396412	perm15	neuron_Development
Cortex	medium spiny neuron	Ageing	0.143715	perm15	medium spiny neuron_Ageing
Cortex	medium spiny neuron	Development	0.954994	perm15	medium spiny neuron_Development
Cortex	interneuron	Ageing	-0.0359288	perm15	interneuron_Ageing
Cortex	interneuron	Development	-0.900937	perm15	interneuron_Development
Cortex	oligodendrocyte precursor cell	Ageing	-0.371264	perm15	oligodendrocyte precursor cell_Ageing
Cortex	oligodendrocyte precursor cell	Development	-0.792825	perm15	oligodendrocyte precursor cell_Development
Cortex	neuronal stem cell	Ageing	-0.790433	perm15	neuronal stem cell_Ageing
Cortex	neuronal stem cell	Development	-0.991031	perm15	neuronal stem cell_Development
Cortex	Bergmann glial cell	Ageing	-0.203596	perm15	Bergmann glial cell_Ageing
Cortex	Bergmann glial cell	Development	0.252262	perm15	Bergmann glial cell_Development
Cortex	brain pericyte	Ageing	0.143715	perm15	brain pericyte_Ageing
Cortex	brain pericyte	Development	0.216225	perm15	brain pericyte_Development
Cortex	CD8-positive, alpha-beta T cell	Ageing	0.838338	perm15	CD8-positive, alpha-beta T cell_Ageing
Cortex	CD8-positive, alpha-beta T cell	Development	-0.396412	perm15	CD8-positive, alpha-beta T cell_Development
Cortex	mature NK T cell	Ageing	0.658694	perm15	mature NK T cell_Ageing
Cortex	mature NK T cell	Development	0.936975	perm15	mature NK T cell_Development
Cortex	neuroepithelial cell	Ageing	-0.275454	perm15	neuroepithelial cell_Ageing
Cortex	neuroepithelial cell	Development	-0.738769	perm15	neuroepithelial cell_Development
Cortex	T cell	Ageing	0.574861	perm15	T cell_Ageing
Cortex	T cell	Development	-0.216225	perm15	T cell_Development
Cortex	ependymal cell	Ageing	0	perm16	ependymal cell_Ageing
Cortex	ependymal cell	Development	-0.234244	perm16	ependymal cell_Development
Cortex	astrocyte	Ageing	0.335335	perm16	astrocyte_Ageing
Cortex	astrocyte	Development	0.991031	perm16	astrocyte_Development
Cortex	oligodendrocyte	Ageing	0.874267	perm16	oligodendrocyte_Ageing
Cortex	oligodendrocyte	Development	0.991031	perm16	oligodendrocyte_Development
Cortex	endothelial cell	Ageing	-0.586837	perm16	endothelial cell_Ageing
Cortex	endothelial cell	Development	-0.991031	perm16	endothelial cell_Development
Cortex	neuron	Ageing	-0.766481	perm16	neuron_Ageing
Cortex	neuron	Development	0.198206	perm16	neuron_Development
Cortex	medium spiny neuron	Ageing	0.227549	perm16	medium spiny neuron_Ageing
Cortex	medium spiny neuron	Development	0.954994	perm16	medium spiny neuron_Development
Cortex	interneuron	Ageing	0.574861	perm16	interneuron_Ageing
Cortex	interneuron	Development	0.828862	perm16	interneuron_Development
Cortex	oligodendrocyte precursor cell	Ageing	-0.622766	perm16	oligodendrocyte precursor cell_Ageing
Cortex	oligodendrocyte precursor cell	Development	-0.666694	perm16	oligodendrocyte precursor cell_Development
Cortex	neuronal stem cell	Ageing	-0.790433	perm16	neuronal stem cell_Ageing
Cortex	neuronal stem cell	Development	-0.991031	perm16	neuronal stem cell_Development
Cortex	Bergmann glial cell	Ageing	-0.550908	perm16	Bergmann glial cell_Ageing
Cortex	Bergmann glial cell	Development	0.882919	perm16	Bergmann glial cell_Development
Cortex	brain pericyte	Ageing	0.263478	perm16	brain pericyte_Ageing
Cortex	brain pericyte	Development	-0.414431	perm16	brain pericyte_Development
Cortex	CD8-positive, alpha-beta T cell	Ageing	0.263478	perm16	CD8-positive, alpha-beta T cell_Ageing
Cortex	CD8-positive, alpha-beta T cell	Development	-0.846881	perm16	CD8-positive, alpha-beta T cell_Development
Cortex	mature NK T cell	Ageing	0.694623	perm16	mature NK T cell_Ageing
Cortex	mature NK T cell	Development	0.630656	perm16	mature NK T cell_Development
Cortex	neuroepithelial cell	Ageing	0.467074	perm16	neuroepithelial cell_Ageing
Cortex	neuroepithelial cell	Development	-0.738769	perm16	neuroepithelial cell_Development
Cortex	T cell	Ageing	0.946125	perm16	T cell_Ageing
Cortex	T cell	Development	0.14415	perm16	T cell_Development
Cortex	ependymal cell	Ageing	0.610789	perm17	ependymal cell_Ageing
Cortex	ependymal cell	Development	-0.14415	perm17	ependymal cell_Development
Cortex	astrocyte	Ageing	0.407193	perm17	astrocyte_Ageing
Cortex	astrocyte	Development	0.991031	perm17	astrocyte_Development
Cortex	oligodendrocyte	Ageing	0.970077	perm17	oligodendrocyte_Ageing
Cortex	oligodendrocyte	Development	0.991031	perm17	oligodendrocyte_Development
Cortex	endothelial cell	Ageing	-0.550908	perm17	endothelial cell_Ageing
Cortex	endothelial cell	Development	-0.991031	perm17	endothelial cell_Development
Cortex	neuron	Ageing	-0.706599	perm17	neuron_Ageing
Cortex	neuron	Development	0.324337	perm17	neuron_Development
Cortex	medium spiny neuron	Ageing	0.143715	perm17	medium spiny neuron_Ageing
Cortex	medium spiny neuron	Development	0.954994	perm17	medium spiny neuron_Development
Cortex	interneuron	Ageing	0.0958101	perm17	interneuron_Ageing
Cortex	interneuron	Development	-0.612637	perm17	interneuron_Development
Cortex	oligodendrocyte precursor cell	Ageing	-0.718576	perm17	oligodendrocyte precursor cell_Ageing
Cortex	oligodendrocyte precursor cell	Development	-0.792825	perm17	oligodendrocyte precursor cell_Development
Cortex	neuronal stem cell	Ageing	-0.742528	perm17	neuronal stem cell_Ageing
Cortex	neuronal stem cell	Development	-0.991031	perm17	neuronal stem cell_Development
Cortex	Bergmann glial cell	Ageing	-0.467074	perm17	Bergmann glial cell_Ageing
Cortex	Bergmann glial cell	Development	0.954994	perm17	Bergmann glial cell_Development
Cortex	brain pericyte	Ageing	0.0239525	perm17	brain pericyte_Ageing
Cortex	brain pericyte	Development	-0.630656	perm17	brain pericyte_Development
Cortex	CD8-positive, alpha-beta T cell	Ageing	0.562884	perm17	CD8-positive, alpha-beta T cell_Ageing
Cortex	CD8-positive, alpha-beta T cell	Development	-0.594619	perm17	CD8-positive, alpha-beta T cell_Development
Cortex	mature NK T cell	Ageing	-0.263478	perm17	mature NK T cell_Ageing
Cortex	mature NK T cell	Development	-0.0900937	perm17	mature NK T cell_Development
Cortex	neuroepithelial cell	Ageing	-0.323359	perm17	neuroepithelial cell_Ageing
Cortex	neuroepithelial cell	Development	-0.882919	perm17	neuroepithelial cell_Development
Cortex	T cell	Ageing	0.970077	perm17	T cell_Ageing
Cortex	T cell	Development	-0.522544	perm17	T cell_Development
Cortex	ependymal cell	Ageing	0.155691	perm18	ependymal cell_Ageing
Cortex	ependymal cell	Development	-0.684712	perm18	ependymal cell_Development
Cortex	astrocyte	Ageing	0.634742	perm18	astrocyte_Ageing
Cortex	astrocyte	Development	0.954994	perm18	astrocyte_Development
Cortex	oligodendrocyte	Ageing	0.874267	perm18	oligodendrocyte_Ageing
Cortex	oligodendrocyte	Development	0.991031	perm18	oligodendrocyte_Development
Cortex	endothelial cell	Ageing	-0.143715	perm18	endothelial cell_Ageing
Cortex	endothelial cell	Development	-0.846881	perm18	endothelial cell_Development
Cortex	neuron	Ageing	-0.586837	perm18	neuron_Ageing
Cortex	neuron	Development	0.126131	perm18	neuron_Development
Cortex	medium spiny neuron	Ageing	0.143715	perm18	medium spiny neuron_Ageing
Cortex	medium spiny neuron	Development	0.954994	perm18	medium spiny neuron_Development
Cortex	interneuron	Ageing	-0.38324	perm18	interneuron_Ageing
Cortex	interneuron	Development	0.792825	perm18	interneuron_Development
Cortex	oligodendrocyte precursor cell	Ageing	-0.491027	perm18	oligodendrocyte precursor cell_Ageing
Cortex	oligodendrocyte precursor cell	Development	-0.792825	perm18	oligodendrocyte precursor cell_Development
Cortex	neuronal stem cell	Ageing	-0.682647	perm18	neuronal stem cell_Ageing
Cortex	neuronal stem cell	Development	-0.991031	perm18	neuronal stem cell_Development
Cortex	Bergmann glial cell	Ageing	-0.455098	perm18	Bergmann glial cell_Ageing
Cortex	Bergmann glial cell	Development	0.991031	perm18	Bergmann glial cell_Development
Cortex	brain pericyte	Ageing	0.239525	perm18	brain pericyte_Ageing
Cortex	brain pericyte	Development	-0.8649	perm18	brain pericyte_Development
Cortex	CD8-positive, alpha-beta T cell	Ageing	0.455098	perm18	CD8-positive, alpha-beta T cell_Ageing
Cortex	CD8-positive, alpha-beta T cell	Development	0.216225	perm18	CD8-positive, alpha-beta T cell_Development
Cortex	mature NK T cell	Ageing	0.718576	perm18	mature NK T cell_Ageing
Cortex	mature NK T cell	Development	-0.900937	perm18	mature NK T cell_Development
Cortex	neuroepithelial cell	Ageing	0.347312	perm18	neuroepithelial cell_Ageing
Cortex	neuroepithelial cell	Development	-0.684712	perm18	neuroepithelial cell_Development
Cortex	T cell	Ageing	0.89822	perm18	T cell_Ageing
Cortex	T cell	Development	-0.684712	perm18	T cell_Development
Cortex	ependymal cell	Ageing	0.0598813	perm19	ependymal cell_Ageing
Cortex	ependymal cell	Development	-0.0180187	perm19	ependymal cell_Development
Cortex	astrocyte	Ageing	0.455098	perm19	astrocyte_Ageing
Cortex	astrocyte	Development	0.991031	perm19	astrocyte_Development
Cortex	oligodendrocyte	Ageing	0.874267	perm19	oligodendrocyte_Ageing
Cortex	oligodendrocyte	Development	0.954994	perm19	oligodendrocyte_Development
Cortex	endothelial cell	Ageing	-0.586837	perm19	endothelial cell_Ageing
Cortex	endothelial cell	Development	-0.991031	perm19	endothelial cell_Development
Cortex	neuron	Ageing	-0.646718	perm19	neuron_Ageing
Cortex	neuron	Development	0.126131	perm19	neuron_Development
Cortex	medium spiny neuron	Ageing	0.179644	perm19	medium spiny neuron_Ageing
Cortex	medium spiny neuron	Development	0.954994	perm19	medium spiny neuron_Development
Cortex	interneuron	Ageing	0.155691	perm19	interneuron_Ageing
Cortex	interneuron	Development	0.324337	perm19	interneuron_Development
Cortex	oligodendrocyte precursor cell	Ageing	-0.886243	perm19	oligodendrocyte precursor cell_Ageing
Cortex	oligodendrocyte precursor cell	Development	-0.792825	perm19	oligodendrocyte precursor cell_Development
Cortex	neuronal stem cell	Ageing	-0.790433	perm19	neuronal stem cell_Ageing
Cortex	neuronal stem cell	Development	-0.991031	perm19	neuronal stem cell_Development
Cortex	Bergmann glial cell	Ageing	-0.239525	perm19	Bergmann glial cell_Ageing
Cortex	Bergmann glial cell	Development	0.918956	perm19	Bergmann glial cell_Development
Cortex	brain pericyte	Ageing	0.143715	perm19	brain pericyte_Ageing
Cortex	brain pericyte	Development	-0.486506	perm19	brain pericyte_Development
Cortex	CD8-positive, alpha-beta T cell	Ageing	0.311383	perm19	CD8-positive, alpha-beta T cell_Ageing
Cortex	CD8-positive, alpha-beta T cell	Development	-0.324337	perm19	CD8-positive, alpha-beta T cell_Development
Cortex	mature NK T cell	Ageing	0.155691	perm19	mature NK T cell_Ageing
Cortex	mature NK T cell	Development	-0.702731	perm19	mature NK T cell_Development
Cortex	neuroepithelial cell	Ageing	0.514979	perm19	neuroepithelial cell_Ageing
Cortex	neuroepithelial cell	Development	0.558581	perm19	neuroepithelial cell_Development
Cortex	T cell	Ageing	0.922172	perm19	T cell_Ageing
Cortex	T cell	Development	-0.738769	perm19	T cell_Development
Cortex	ependymal cell	Ageing	0.419169	perm20	ependymal cell_Ageing
Cortex	ependymal cell	Development	-0.234244	perm20	ependymal cell_Development
Cortex	astrocyte	Ageing	0.263478	perm20	astrocyte_Ageing
Cortex	astrocyte	Development	0.991031	perm20	astrocyte_Development
Cortex	oligodendrocyte	Ageing	0.874267	perm20	oligodendrocyte_Ageing
Cortex	oligodendrocyte	Development	0.991031	perm20	oligodendrocyte_Development
Cortex	endothelial cell	Ageing	-0.431145	perm20	endothelial cell_Ageing
Cortex	endothelial cell	Development	-0.846881	perm20	endothelial cell_Development
Cortex	neuron	Ageing	-0.586837	perm20	neuron_Ageing
Cortex	neuron	Development	0.594619	perm20	neuron_Development
Cortex	medium spiny neuron	Ageing	0.0718576	perm20	medium spiny neuron_Ageing
Cortex	medium spiny neuron	Development	0.954994	perm20	medium spiny neuron_Development
Cortex	interneuron	Ageing	0	perm20	interneuron_Ageing
Cortex	interneuron	Development	0.558581	perm20	interneuron_Development
Cortex	oligodendrocyte precursor cell	Ageing	-0.658694	perm20	oligodendrocyte precursor cell_Ageing
Cortex	oligodendrocyte precursor cell	Development	-0.882919	perm20	oligodendrocyte precursor cell_Development
Cortex	neuronal stem cell	Ageing	-0.742528	perm20	neuronal stem cell_Ageing
Cortex	neuronal stem cell	Development	-0.991031	perm20	neuronal stem cell_Development
Cortex	Bergmann glial cell	Ageing	-0.323359	perm20	Bergmann glial cell_Ageing
Cortex	Bergmann glial cell	Development	0.991031	perm20	Bergmann glial cell_Development
Cortex	brain pericyte	Ageing	0.323359	perm20	brain pericyte_Ageing
Cortex	brain pericyte	Development	-0.8649	perm20	brain pericyte_Development
Cortex	CD8-positive, alpha-beta T cell	Ageing	0.179644	perm20	CD8-positive, alpha-beta T cell_Ageing
Cortex	CD8-positive, alpha-beta T cell	Development	-0.684712	perm20	CD8-positive, alpha-beta T cell_Development
Cortex	mature NK T cell	Ageing	0.167668	perm20	mature NK T cell_Ageing
Cortex	mature NK T cell	Development	-0.180187	perm20	mature NK T cell_Development
Cortex	neuroepithelial cell	Ageing	0.431145	perm20	neuroepithelial cell_Ageing
Cortex	neuroepithelial cell	Development	-0.882919	perm20	neuroepithelial cell_Development
Cortex	T cell	Ageing	0.886243	perm20	T cell_Ageing
Cortex	T cell	Development	0.2883	perm20	T cell_Development
Cortex	ependymal cell	Ageing	-0.155691	perm21	ependymal cell_Ageing
Cortex	ependymal cell	Development	-0.14415	perm21	ependymal cell_Development
Cortex	astrocyte	Ageing	0.395217	perm21	astrocyte_Ageing
Cortex	astrocyte	Development	0.991031	perm21	astrocyte_Development
Cortex	oligodendrocyte	Ageing	0.874267	perm21	oligodendrocyte_Ageing
Cortex	oligodendrocyte	Development	0.991031	perm21	oligodendrocyte_Development
Cortex	endothelial cell	Ageing	0.143715	perm21	endothelial cell_Ageing
Cortex	endothelial cell	Development	-0.954994	perm21	endothelial cell_Development
Cortex	neuron	Ageing	-0.646718	perm21	neuron_Ageing
Cortex	neuron	Development	0.396412	perm21	neuron_Development
Cortex	medium spiny neuron	Ageing	0.143715	perm21	medium spiny neuron_Ageing
Cortex	medium spiny neuron	Development	0.954994	perm21	medium spiny neuron_Development
Cortex	interneuron	Ageing	-0.19162	perm21	interneuron_Ageing
Cortex	interneuron	Development	0.594619	perm21	interneuron_Development
Cortex	oligodendrocyte precursor cell	Ageing	-0.19162	perm21	oligodendrocyte precursor cell_Ageing
Cortex	oligodendrocyte precursor cell	Development	-0.702731	perm21	oligodendrocyte precursor cell_Development
Cortex	neuronal stem cell	Ageing	-0.634742	perm21	neuronal stem cell_Ageing
Cortex	neuronal stem cell	Development	-0.991031	perm21	neuronal stem cell_Development
Cortex	Bergmann glial cell	Ageing	-0.347312	perm21	Bergmann glial cell_Ageing
Cortex	Bergmann glial cell	Development	0.991031	perm21	Bergmann glial cell_Development
Cortex	brain pericyte	Ageing	-0.119763	perm21	brain pericyte_Ageing
Cortex	brain pericyte	Development	-0.8649	perm21	brain pericyte_Development
Cortex	CD8-positive, alpha-beta T cell	Ageing	0.550908	perm21	CD8-positive, alpha-beta T cell_Ageing
Cortex	CD8-positive, alpha-beta T cell	Development	-0.468487	perm21	CD8-positive, alpha-beta T cell_Development
Cortex	mature NK T cell	Ageing	0.826362	perm21	mature NK T cell_Ageing
Cortex	mature NK T cell	Development	0.522544	perm21	mature NK T cell_Development
Cortex	neuroepithelial cell	Ageing	0.419169	perm21	neuroepithelial cell_Ageing
Cortex	neuroepithelial cell	Development	-0.666694	perm21	neuroepithelial cell_Development
Cortex	T cell	Ageing	0.730552	perm21	T cell_Ageing
Cortex	T cell	Development	-0.738769	perm21	T cell_Development
Cortex	ependymal cell	Ageing	0.0479051	perm22	ependymal cell_Ageing
Cortex	ependymal cell	Development	-0.414431	perm22	ependymal cell_Development
Cortex	astrocyte	Ageing	0.658694	perm22	astrocyte_Ageing
Cortex	astrocyte	Development	0.991031	perm22	astrocyte_Development
Cortex	oligodendrocyte	Ageing	0.874267	perm22	oligodendrocyte_Ageing
Cortex	oligodendrocyte	Development	0.991031	perm22	oligodendrocyte_Development
Cortex	endothelial cell	Ageing	-0.359288	perm22	endothelial cell_Ageing
Cortex	endothelial cell	Development	-0.846881	perm22	endothelial cell_Development
Cortex	neuron	Ageing	-0.646718	perm22	neuron_Ageing
Cortex	neuron	Development	-0.0360375	perm22	neuron_Development
Cortex	medium spiny neuron	Ageing	0.143715	perm22	medium spiny neuron_Ageing
Cortex	medium spiny neuron	Development	0.954994	perm22	medium spiny neuron_Development
Cortex	interneuron	Ageing	-0.215573	perm22	interneuron_Ageing
Cortex	interneuron	Development	0.882919	perm22	interneuron_Development
Cortex	oligodendrocyte precursor cell	Ageing	-0.622766	perm22	oligodendrocyte precursor cell_Ageing
Cortex	oligodendrocyte precursor cell	Development	-0.666694	perm22	oligodendrocyte precursor cell_Development
Cortex	neuronal stem cell	Ageing	-0.790433	perm22	neuronal stem cell_Ageing
Cortex	neuronal stem cell	Development	-0.991031	perm22	neuronal stem cell_Development
Cortex	Bergmann glial cell	Ageing	-0.610789	perm22	Bergmann glial cell_Ageing
Cortex	Bergmann glial cell	Development	0.882919	perm22	Bergmann glial cell_Development
Cortex	brain pericyte	Ageing	0.131739	perm22	brain pericyte_Ageing
Cortex	brain pericyte	Development	0.072075	perm22	brain pericyte_Development
Cortex	CD8-positive, alpha-beta T cell	Ageing	0.586837	perm22	CD8-positive, alpha-beta T cell_Ageing
Cortex	CD8-positive, alpha-beta T cell	Development	-0.0900937	perm22	CD8-positive, alpha-beta T cell_Development
Cortex	mature NK T cell	Ageing	0.730552	perm22	mature NK T cell_Ageing
Cortex	mature NK T cell	Development	0.828862	perm22	mature NK T cell_Development
Cortex	neuroepithelial cell	Ageing	-0.239525	perm22	neuroepithelial cell_Ageing
Cortex	neuroepithelial cell	Development	-0.846881	perm22	neuroepithelial cell_Development
Cortex	T cell	Ageing	0.922172	perm22	T cell_Ageing
Cortex	T cell	Development	-0.630656	perm22	T cell_Development
Cortex	ependymal cell	Ageing	0.299407	perm23	ependymal cell_Ageing
Cortex	ependymal cell	Development	0.0900937	perm23	ependymal cell_Development
Cortex	astrocyte	Ageing	0.0119763	perm23	astrocyte_Ageing
Cortex	astrocyte	Development	0.954994	perm23	astrocyte_Development
Cortex	oligodendrocyte	Ageing	0.874267	perm23	oligodendrocyte_Ageing
Cortex	oligodendrocyte	Development	0.991031	perm23	oligodendrocyte_Development
Cortex	endothelial cell	Ageing	-0.694623	perm23	endothelial cell_Ageing
Cortex	endothelial cell	Development	-0.954994	perm23	endothelial cell_Development
Cortex	neuron	Ageing	-0.766481	perm23	neuron_Ageing
Cortex	neuron	Development	0.0540562	perm23	neuron_Development
Cortex	medium spiny neuron	Ageing	0.143715	perm23	medium spiny neuron_Ageing
Cortex	medium spiny neuron	Development	0.954994	perm23	medium spiny neuron_Development
Cortex	interneuron	Ageing	0.694623	perm23	interneuron_Ageing
Cortex	interneuron	Development	0.846881	perm23	interneuron_Development
Cortex	oligodendrocyte precursor cell	Ageing	-0.682647	perm23	oligodendrocyte precursor cell_Ageing
Cortex	oligodendrocyte precursor cell	Development	-0.882919	perm23	oligodendrocyte precursor cell_Development
Cortex	neuronal stem cell	Ageing	-0.634742	perm23	neuronal stem cell_Ageing
Cortex	neuronal stem cell	Development	-0.991031	perm23	neuronal stem cell_Development
Cortex	Bergmann glial cell	Ageing	0.203596	perm23	Bergmann glial cell_Ageing
Cortex	Bergmann glial cell	Development	0.991031	perm23	Bergmann glial cell_Development
Cortex	brain pericyte	Ageing	0.371264	perm23	brain pericyte_Ageing
Cortex	brain pericyte	Development	-0.2883	perm23	brain pericyte_Development
Cortex	CD8-positive, alpha-beta T cell	Ageing	0.850315	perm23	CD8-positive, alpha-beta T cell_Ageing
Cortex	CD8-positive, alpha-beta T cell	Development	-0.846881	perm23	CD8-positive, alpha-beta T cell_Development
Cortex	mature NK T cell	Ageing	0.347312	perm23	mature NK T cell_Ageing
Cortex	mature NK T cell	Development	-0.828862	perm23	mature NK T cell_Development
Cortex	neuroepithelial cell	Ageing	-0.251502	perm23	neuroepithelial cell_Ageing
Cortex	neuroepithelial cell	Development	-0.846881	perm23	neuroepithelial cell_Development
Cortex	T cell	Ageing	0.89822	perm23	T cell_Ageing
Cortex	T cell	Development	0.234244	perm23	T cell_Development
Cortex	ependymal cell	Ageing	-0.0958101	perm24	ependymal cell_Ageing
Cortex	ependymal cell	Development	-0.486506	perm24	ependymal cell_Development
Cortex	astrocyte	Ageing	0.479051	perm24	astrocyte_Ageing
Cortex	astrocyte	Development	0.954994	perm24	astrocyte_Development
Cortex	oligodendrocyte	Ageing	0.970077	perm24	oligodendrocyte_Ageing
Cortex	oligodendrocyte	Development	0.991031	perm24	oligodendrocyte_Development
Cortex	endothelial cell	Ageing	-0.503003	perm24	endothelial cell_Ageing
Cortex	endothelial cell	Development	-0.882919	perm24	endothelial cell_Development
Cortex	neuron	Ageing	-0.766481	perm24	neuron_Ageing
Cortex	neuron	Development	0.396412	perm24	neuron_Development
Cortex	medium spiny neuron	Ageing	0.227549	perm24	medium spiny neuron_Ageing
Cortex	medium spiny neuron	Development	0.954994	perm24	medium spiny neuron_Development
Cortex	interneuron	Ageing	-0.119763	perm24	interneuron_Ageing
Cortex	interneuron	Development	0.666694	perm24	interneuron_Development
Cortex	oligodendrocyte precursor cell	Ageing	-0.730552	perm24	oligodendrocyte precursor cell_Ageing
Cortex	oligodendrocyte precursor cell	Development	-0.666694	perm24	oligodendrocyte precursor cell_Development
Cortex	neuronal stem cell	Ageing	-0.790433	perm24	neuronal stem cell_Ageing
Cortex	neuronal stem cell	Development	-0.991031	perm24	neuronal stem cell_Development
Cortex	Bergmann glial cell	Ageing	-0.311383	perm24	Bergmann glial cell_Ageing
Cortex	Bergmann glial cell	Development	0.991031	perm24	Bergmann glial cell_Development
Cortex	brain pericyte	Ageing	0.371264	perm24	brain pericyte_Ageing
Cortex	brain pericyte	Development	-0.684712	perm24	brain pericyte_Development
Cortex	CD8-positive, alpha-beta T cell	Ageing	0.526956	perm24	CD8-positive, alpha-beta T cell_Ageing
Cortex	CD8-positive, alpha-beta T cell	Development	0.2883	perm24	CD8-positive, alpha-beta T cell_Development
Cortex	mature NK T cell	Ageing	0.467074	perm24	mature NK T cell_Ageing
Cortex	mature NK T cell	Development	-0.846881	perm24	mature NK T cell_Development
Cortex	neuroepithelial cell	Ageing	0.850315	perm24	neuroepithelial cell_Ageing
Cortex	neuroepithelial cell	Development	-0.738769	perm24	neuroepithelial cell_Development
Cortex	T cell	Ageing	0.754505	perm24	T cell_Ageing
Cortex	T cell	Development	-0.666694	perm24	T cell_Development
Cortex	ependymal cell	Ageing	0.215573	perm25	ependymal cell_Ageing
Cortex	ependymal cell	Development	-0.43245	perm25	ependymal cell_Development
Cortex	astrocyte	Ageing	0.730552	perm25	astrocyte_Ageing
Cortex	astrocyte	Development	0.991031	perm25	astrocyte_Development
Cortex	oligodendrocyte	Ageing	0.874267	perm25	oligodendrocyte_Ageing
Cortex	oligodendrocyte	Development	0.991031	perm25	oligodendrocyte_Development
Cortex	endothelial cell	Ageing	-0.538932	perm25	endothelial cell_Ageing
Cortex	endothelial cell	Development	-0.882919	perm25	endothelial cell_Development
Cortex	neuron	Ageing	-0.646718	perm25	neuron_Ageing
Cortex	neuron	Development	0.396412	perm25	neuron_Development
Cortex	medium spiny neuron	Ageing	-0.0119763	perm25	medium spiny neuron_Ageing
Cortex	medium spiny neuron	Development	0.954994	perm25	medium spiny neuron_Development
Cortex	interneuron	Ageing	0.0598813	perm25	interneuron_Ageing
Cortex	interneuron	Development	0.900937	perm25	interneuron_Development
Cortex	oligodendrocyte precursor cell	Ageing	-0.730552	perm25	oligodendrocyte precursor cell_Ageing
Cortex	oligodendrocyte precursor cell	Development	-0.702731	perm25	oligodendrocyte precursor cell_Development
Cortex	neuronal stem cell	Ageing	-0.790433	perm25	neuronal stem cell_Ageing
Cortex	neuronal stem cell	Development	-0.991031	perm25	neuronal stem cell_Development
Cortex	Bergmann glial cell	Ageing	-0.467074	perm25	Bergmann glial cell_Ageing
Cortex	Bergmann glial cell	Development	0.882919	perm25	Bergmann glial cell_Development
Cortex	brain pericyte	Ageing	0.0479051	perm25	brain pericyte_Ageing
Cortex	brain pericyte	Development	-0.342356	perm25	brain pericyte_Development
Cortex	CD8-positive, alpha-beta T cell	Ageing	-0.38324	perm25	CD8-positive, alpha-beta T cell_Ageing
Cortex	CD8-positive, alpha-beta T cell	Development	-0.486506	perm25	CD8-positive, alpha-beta T cell_Development
Cortex	mature NK T cell	Ageing	0.407193	perm25	mature NK T cell_Ageing
Cortex	mature NK T cell	Development	-0.756787	perm25	mature NK T cell_Development
Cortex	neuroepithelial cell	Ageing	0.455098	perm25	neuroepithelial cell_Ageing
Cortex	neuroepithelial cell	Development	-0.666694	perm25	neuroepithelial cell_Development
Cortex	T cell	Ageing	0.946125	perm25	T cell_Ageing
Cortex	T cell	Development	-0.846881	perm25	T cell_Development
Cortex	ependymal cell	Ageing	0.155691	perm26	ependymal cell_Ageing
Cortex	ependymal cell	Development	-0.342356	perm26	ependymal cell_Development
Cortex	astrocyte	Ageing	0.119763	perm26	astrocyte_Ageing
Cortex	astrocyte	Development	0.991031	perm26	astrocyte_Development
Cortex	oligodendrocyte	Ageing	0.99403	perm26	oligodendrocyte_Ageing
Cortex	oligodendrocyte	Development	0.991031	perm26	oligodendrocyte_Development
Cortex	endothelial cell	Ageing	-0.227549	perm26	endothelial cell_Ageing
Cortex	endothelial cell	Development	-0.882919	perm26	endothelial cell_Development
Cortex	neuron	Ageing	-0.766481	perm26	neuron_Ageing
Cortex	neuron	Development	0.198206	perm26	neuron_Development
Cortex	medium spiny neuron	Ageing	-0.0119763	perm26	medium spiny neuron_Ageing
Cortex	medium spiny neuron	Development	0.954994	perm26	medium spiny neuron_Development
Cortex	interneuron	Ageing	0.395217	perm26	interneuron_Ageing
Cortex	interneuron	Development	0.936975	perm26	interneuron_Development
Cortex	oligodendrocyte precursor cell	Ageing	-0.778457	perm26	oligodendrocyte precursor cell_Ageing
Cortex	oligodendrocyte precursor cell	Development	-0.846881	perm26	oligodendrocyte precursor cell_Development
Cortex	neuronal stem cell	Ageing	-0.790433	perm26	neuronal stem cell_Ageing
Cortex	neuronal stem cell	Development	-0.991031	perm26	neuronal stem cell_Development
Cortex	Bergmann glial cell	Ageing	0	perm26	Bergmann glial cell_Ageing
Cortex	Bergmann glial cell	Development	0.954994	perm26	Bergmann glial cell_Development
Cortex	brain pericyte	Ageing	0.371264	perm26	brain pericyte_Ageing
Cortex	brain pericyte	Development	-0.810844	perm26	brain pericyte_Development
Cortex	CD8-positive, alpha-beta T cell	Ageing	0.167668	perm26	CD8-positive, alpha-beta T cell_Ageing
Cortex	CD8-positive, alpha-beta T cell	Development	-0.630656	perm26	CD8-positive, alpha-beta T cell_Development
Cortex	mature NK T cell	Ageing	0.766481	perm26	mature NK T cell_Ageing
Cortex	mature NK T cell	Development	0.8649	perm26	mature NK T cell_Development
Cortex	neuroepithelial cell	Ageing	0.299407	perm26	neuroepithelial cell_Ageing
Cortex	neuroepithelial cell	Development	-0.702731	perm26	neuroepithelial cell_Development
Cortex	T cell	Ageing	0.850315	perm26	T cell_Ageing
Cortex	T cell	Development	-0.810844	perm26	T cell_Development
Cortex	ependymal cell	Ageing	0.131739	perm27	ependymal cell_Ageing
Cortex	ependymal cell	Development	0.180187	perm27	ependymal cell_Development
Cortex	astrocyte	Ageing	0.431145	perm27	astrocyte_Ageing
Cortex	astrocyte	Development	0.991031	perm27	astrocyte_Development
Cortex	oligodendrocyte	Ageing	0.970077	perm27	oligodendrocyte_Ageing
Cortex	oligodendrocyte	Development	0.991031	perm27	oligodendrocyte_Development
Cortex	endothelial cell	Ageing	-0.622766	perm27	endothelial cell_Ageing
Cortex	endothelial cell	Development	-0.991031	perm27	endothelial cell_Development
Cortex	neuron	Ageing	-0.646718	perm27	neuron_Ageing
Cortex	neuron	Development	0.126131	perm27	neuron_Development
Cortex	medium spiny neuron	Ageing	0.335335	perm27	medium spiny neuron_Ageing
Cortex	medium spiny neuron	Development	0.954994	perm27	medium spiny neuron_Development
Cortex	interneuron	Ageing	0.550908	perm27	interneuron_Ageing
Cortex	interneuron	Development	0.738769	perm27	interneuron_Development
Cortex	oligodendrocyte precursor cell	Ageing	-0.886243	perm27	oligodendrocyte precursor cell_Ageing
Cortex	oligodendrocyte precursor cell	Development	-0.882919	perm27	oligodendrocyte precursor cell_Development
Cortex	neuronal stem cell	Ageing	-0.742528	perm27	neuronal stem cell_Ageing
Cortex	neuronal stem cell	Development	-0.991031	perm27	neuronal stem cell_Development
Cortex	Bergmann glial cell	Ageing	-0.155691	perm27	Bergmann glial cell_Ageing
Cortex	Bergmann glial cell	Development	0.810844	perm27	Bergmann glial cell_Development
Cortex	brain pericyte	Ageing	0.431145	perm27	brain pericyte_Ageing
Cortex	brain pericyte	Development	-0.738769	perm27	brain pericyte_Development
Cortex	CD8-positive, alpha-beta T cell	Ageing	0.514979	perm27	CD8-positive, alpha-beta T cell_Ageing
Cortex	CD8-positive, alpha-beta T cell	Development	-0.666694	perm27	CD8-positive, alpha-beta T cell_Development
Cortex	mature NK T cell	Ageing	0.706599	perm27	mature NK T cell_Ageing
Cortex	mature NK T cell	Development	0.882919	perm27	mature NK T cell_Development
Cortex	neuroepithelial cell	Ageing	-0.251502	perm27	neuroepithelial cell_Ageing
Cortex	neuroepithelial cell	Development	-0.792825	perm27	neuroepithelial cell_Development
Cortex	T cell	Ageing	0.89822	perm27	T cell_Ageing
Cortex	T cell	Development	-0.666694	perm27	T cell_Development
Cortex	ependymal cell	Ageing	0.311383	perm28	ependymal cell_Ageing
Cortex	ependymal cell	Development	-0.072075	perm28	ependymal cell_Development
Cortex	astrocyte	Ageing	0.251502	perm28	astrocyte_Ageing
Cortex	astrocyte	Development	0.991031	perm28	astrocyte_Development
Cortex	oligodendrocyte	Ageing	0.874267	perm28	oligodendrocyte_Ageing
Cortex	oligodendrocyte	Development	0.991031	perm28	oligodendrocyte_Development
Cortex	endothelial cell	Ageing	-0.514979	perm28	endothelial cell_Ageing
Cortex	endothelial cell	Development	-0.991031	perm28	endothelial cell_Development
Cortex	neuron	Ageing	-0.646718	perm28	neuron_Ageing
Cortex	neuron	Development	0.126131	perm28	neuron_Development
Cortex	medium spiny neuron	Ageing	0.335335	perm28	medium spiny neuron_Ageing
Cortex	medium spiny neuron	Development	0.954994	perm28	medium spiny neuron_Development
Cortex	interneuron	Ageing	0.275454	perm28	interneuron_Ageing
Cortex	interneuron	Development	0.108112	perm28	interneuron_Development
Cortex	oligodendrocyte precursor cell	Ageing	-0.658694	perm28	oligodendrocyte precursor cell_Ageing
Cortex	oligodendrocyte precursor cell	Development	-0.702731	perm28	oligodendrocyte precursor cell_Development
Cortex	neuronal stem cell	Ageing	-0.742528	perm28	neuronal stem cell_Ageing
Cortex	neuronal stem cell	Development	-0.991031	perm28	neuronal stem cell_Development
Cortex	Bergmann glial cell	Ageing	-0.0598813	perm28	Bergmann glial cell_Ageing
Cortex	Bergmann glial cell	Development	0.991031	perm28	Bergmann glial cell_Development
Cortex	brain pericyte	Ageing	0.0598813	perm28	brain pericyte_Ageing
Cortex	brain pericyte	Development	0.234244	perm28	brain pericyte_Development
Cortex	CD8-positive, alpha-beta T cell	Ageing	0.658694	perm28	CD8-positive, alpha-beta T cell_Ageing
Cortex	CD8-positive, alpha-beta T cell	Development	0.684712	perm28	CD8-positive, alpha-beta T cell_Development
Cortex	mature NK T cell	Ageing	0.167668	perm28	mature NK T cell_Ageing
Cortex	mature NK T cell	Development	-0.954994	perm28	mature NK T cell_Development
Cortex	neuroepithelial cell	Ageing	0.730552	perm28	neuroepithelial cell_Ageing
Cortex	neuroepithelial cell	Development	0.180187	perm28	neuroepithelial cell_Development
Cortex	T cell	Ageing	0.946125	perm28	T cell_Ageing
Cortex	T cell	Development	-0.324337	perm28	T cell_Development
Cortex	ependymal cell	Ageing	0.155691	perm29	ependymal cell_Ageing
Cortex	ependymal cell	Development	-0.360375	perm29	ependymal cell_Development
Cortex	astrocyte	Ageing	0.455098	perm29	astrocyte_Ageing
Cortex	astrocyte	Development	0.991031	perm29	astrocyte_Development
Cortex	oligodendrocyte	Ageing	0.874267	perm29	oligodendrocyte_Ageing
Cortex	oligodendrocyte	Development	0.991031	perm29	oligodendrocyte_Development
Cortex	endothelial cell	Ageing	-0.646718	perm29	endothelial cell_Ageing
Cortex	endothelial cell	Development	-0.991031	perm29	endothelial cell_Development
Cortex	neuron	Ageing	-0.586837	perm29	neuron_Ageing
Cortex	neuron	Development	0.0900937	perm29	neuron_Development
Cortex	medium spiny neuron	Ageing	0.179644	perm29	medium spiny neuron_Ageing
Cortex	medium spiny neuron	Development	0.954994	perm29	medium spiny neuron_Development
Cortex	interneuron	Ageing	0.718576	perm29	interneuron_Ageing
Cortex	interneuron	Development	0.828862	perm29	interneuron_Development
Cortex	oligodendrocyte precursor cell	Ageing	-0.766481	perm29	oligodendrocyte precursor cell_Ageing
Cortex	oligodendrocyte precursor cell	Development	-0.666694	perm29	oligodendrocyte precursor cell_Development
Cortex	neuronal stem cell	Ageing	-0.80241	perm29	neuronal stem cell_Ageing
Cortex	neuronal stem cell	Development	-0.954994	perm29	neuronal stem cell_Development
Cortex	Bergmann glial cell	Ageing	-0.227549	perm29	Bergmann glial cell_Ageing
Cortex	Bergmann glial cell	Development	0.954994	perm29	Bergmann glial cell_Development
Cortex	brain pericyte	Ageing	0.19162	perm29	brain pericyte_Ageing
Cortex	brain pericyte	Development	-0.72075	perm29	brain pericyte_Development
Cortex	CD8-positive, alpha-beta T cell	Ageing	0.251502	perm29	CD8-positive, alpha-beta T cell_Ageing
Cortex	CD8-positive, alpha-beta T cell	Development	-0.774806	perm29	CD8-positive, alpha-beta T cell_Development
Cortex	mature NK T cell	Ageing	0.80241	perm29	mature NK T cell_Ageing
Cortex	mature NK T cell	Development	-0.162169	perm29	mature NK T cell_Development
Cortex	neuroepithelial cell	Ageing	0	perm29	neuroepithelial cell_Ageing
Cortex	neuroepithelial cell	Development	-0.738769	perm29	neuroepithelial cell_Development
Cortex	T cell	Ageing	0.922172	perm29	T cell_Ageing
Cortex	T cell	Development	-0.324337	perm29	T cell_Development
Cortex	ependymal cell	Ageing	0.419169	perm30	ependymal cell_Ageing
Cortex	ependymal cell	Development	-0.108112	perm30	ependymal cell_Development
Cortex	astrocyte	Ageing	0.119763	perm30	astrocyte_Ageing
Cortex	astrocyte	Development	0.991031	perm30	astrocyte_Development
Cortex	oligodendrocyte	Ageing	0.910196	perm30	oligodendrocyte_Ageing
Cortex	oligodendrocyte	Development	0.991031	perm30	oligodendrocyte_Development
Cortex	endothelial cell	Ageing	-0.634742	perm30	endothelial cell_Ageing
Cortex	endothelial cell	Development	-0.882919	perm30	endothelial cell_Development
Cortex	neuron	Ageing	-0.838338	perm30	neuron_Ageing
Cortex	neuron	Development	0.396412	perm30	neuron_Development
Cortex	medium spiny neuron	Ageing	-0.0119763	perm30	medium spiny neuron_Ageing
Cortex	medium spiny neuron	Development	0.954994	perm30	medium spiny neuron_Development
Cortex	interneuron	Ageing	0.431145	perm30	interneuron_Ageing
Cortex	interneuron	Development	0.792825	perm30	interneuron_Development
Cortex	oligodendrocyte precursor cell	Ageing	-0.658694	perm30	oligodendrocyte precursor cell_Ageing
Cortex	oligodendrocyte precursor cell	Development	-0.702731	perm30	oligodendrocyte precursor cell_Development
Cortex	neuronal stem cell	Ageing	-0.754505	perm30	neuronal stem cell_Ageing
Cortex	neuronal stem cell	Development	-0.991031	perm30	neuronal stem cell_Development
Cortex	Bergmann glial cell	Ageing	-0.203596	perm30	Bergmann glial cell_Ageing
Cortex	Bergmann glial cell	Development	0.918956	perm30	Bergmann glial cell_Development
Cortex	brain pericyte	Ageing	0.167668	perm30	brain pericyte_Ageing
Cortex	brain pericyte	Development	-0.486506	perm30	brain pericyte_Development
Cortex	CD8-positive, alpha-beta T cell	Ageing	0.0119763	perm30	CD8-positive, alpha-beta T cell_Ageing
Cortex	CD8-positive, alpha-beta T cell	Development	-0.810844	perm30	CD8-positive, alpha-beta T cell_Development
Cortex	mature NK T cell	Ageing	0.89822	perm30	mature NK T cell_Ageing
Cortex	mature NK T cell	Development	0.396412	perm30	mature NK T cell_Development
Cortex	neuroepithelial cell	Ageing	-0.227549	perm30	neuroepithelial cell_Ageing
Cortex	neuroepithelial cell	Development	-0.270281	perm30	neuroepithelial cell_Development
Cortex	T cell	Ageing	0.946125	perm30	T cell_Ageing
Cortex	T cell	Development	0.468487	perm30	T cell_Development
Cortex	ependymal cell	Ageing	0.359288	perm31	ependymal cell_Ageing
Cortex	ependymal cell	Development	-0.486506	perm31	ependymal cell_Development
Cortex	astrocyte	Ageing	0.119763	perm31	astrocyte_Ageing
Cortex	astrocyte	Development	0.991031	perm31	astrocyte_Development
Cortex	oligodendrocyte	Ageing	0.910196	perm31	oligodendrocyte_Ageing
Cortex	oligodendrocyte	Development	0.991031	perm31	oligodendrocyte_Development
Cortex	endothelial cell	Ageing	-0.503003	perm31	endothelial cell_Ageing
Cortex	endothelial cell	Development	-0.954994	perm31	endothelial cell_Development
Cortex	neuron	Ageing	-0.586837	perm31	neuron_Ageing
Cortex	neuron	Development	0.594619	perm31	neuron_Development
Cortex	medium spiny neuron	Ageing	0.203596	perm31	medium spiny neuron_Ageing
Cortex	medium spiny neuron	Development	0.954994	perm31	medium spiny neuron_Development
Cortex	interneuron	Ageing	0.0838338	perm31	interneuron_Ageing
Cortex	interneuron	Development	-0.540562	perm31	interneuron_Development
Cortex	oligodendrocyte precursor cell	Ageing	-0.826362	perm31	oligodendrocyte precursor cell_Ageing
Cortex	oligodendrocyte precursor cell	Development	-0.702731	perm31	oligodendrocyte precursor cell_Development
Cortex	neuronal stem cell	Ageing	-0.790433	perm31	neuronal stem cell_Ageing
Cortex	neuronal stem cell	Development	-0.991031	perm31	neuronal stem cell_Development
Cortex	Bergmann glial cell	Ageing	-0.239525	perm31	Bergmann glial cell_Ageing
Cortex	Bergmann glial cell	Development	0.882919	perm31	Bergmann glial cell_Development
Cortex	brain pericyte	Ageing	-0.0359288	perm31	brain pericyte_Ageing
Cortex	brain pericyte	Development	-0.108112	perm31	brain pericyte_Development
Cortex	CD8-positive, alpha-beta T cell	Ageing	0.586837	perm31	CD8-positive, alpha-beta T cell_Ageing
Cortex	CD8-positive, alpha-beta T cell	Development	-0.666694	perm31	CD8-positive, alpha-beta T cell_Development
Cortex	mature NK T cell	Ageing	0.275454	perm31	mature NK T cell_Ageing
Cortex	mature NK T cell	Development	0.991031	perm31	mature NK T cell_Development
Cortex	neuroepithelial cell	Ageing	-0.0958101	perm31	neuroepithelial cell_Ageing
Cortex	neuroepithelial cell	Development	-0.0180187	perm31	neuroepithelial cell_Development
Cortex	T cell	Ageing	0.934148	perm31	T cell_Ageing
Cortex	T cell	Development	-0.0540562	perm31	T cell_Development
Cortex	ependymal cell	Ageing	0.514979	perm32	ependymal cell_Ageing
Cortex	ependymal cell	Development	-0.414431	perm32	ependymal cell_Development
Cortex	astrocyte	Ageing	0.395217	perm32	astrocyte_Ageing
Cortex	astrocyte	Development	0.991031	perm32	astrocyte_Development
Cortex	oligodendrocyte	Ageing	0.874267	perm32	oligodendrocyte_Ageing
Cortex	oligodendrocyte	Development	0.954994	perm32	oligodendrocyte_Development
Cortex	endothelial cell	Ageing	-0.550908	perm32	endothelial cell_Ageing
Cortex	endothelial cell	Development	-0.900937	perm32	endothelial cell_Development
Cortex	neuron	Ageing	-0.706599	perm32	neuron_Ageing
Cortex	neuron	Development	0.126131	perm32	neuron_Development
Cortex	medium spiny neuron	Ageing	0.275454	perm32	medium spiny neuron_Ageing
Cortex	medium spiny neuron	Development	0.954994	perm32	medium spiny neuron_Development
Cortex	interneuron	Ageing	0.467074	perm32	interneuron_Ageing
Cortex	interneuron	Development	0.792825	perm32	interneuron_Development
Cortex	oligodendrocyte precursor cell	Ageing	-0.503003	perm32	oligodendrocyte precursor cell_Ageing
Cortex	oligodendrocyte precursor cell	Development	-0.756787	perm32	oligodendrocyte precursor cell_Development
Cortex	neuronal stem cell	Ageing	-0.610789	perm32	neuronal stem cell_Ageing
Cortex	neuronal stem cell	Development	-0.882919	perm32	neuronal stem cell_Development
Cortex	Bergmann glial cell	Ageing	-0.443122	perm32	Bergmann glial cell_Ageing
Cortex	Bergmann glial cell	Development	0.630656	perm32	Bergmann glial cell_Development
Cortex	brain pericyte	Ageing	0.323359	perm32	brain pericyte_Ageing
Cortex	brain pericyte	Development	0.0360375	perm32	brain pericyte_Development
Cortex	CD8-positive, alpha-beta T cell	Ageing	0.479051	perm32	CD8-positive, alpha-beta T cell_Ageing
Cortex	CD8-positive, alpha-beta T cell	Development	-0.846881	perm32	CD8-positive, alpha-beta T cell_Development
Cortex	mature NK T cell	Ageing	0.514979	perm32	mature NK T cell_Ageing
Cortex	mature NK T cell	Development	-0.846881	perm32	mature NK T cell_Development
Cortex	neuroepithelial cell	Ageing	-0.431145	perm32	neuroepithelial cell_Ageing
Cortex	neuroepithelial cell	Development	-0.882919	perm32	neuroepithelial cell_Development
Cortex	T cell	Ageing	0.730552	perm32	T cell_Ageing
Cortex	T cell	Development	0.126131	perm32	T cell_Development
Cortex	ependymal cell	Ageing	-0.107786	perm33	ependymal cell_Ageing
Cortex	ependymal cell	Development	0.108112	perm33	ependymal cell_Development
Cortex	astrocyte	Ageing	0.299407	perm33	astrocyte_Ageing
Cortex	astrocyte	Development	0.991031	perm33	astrocyte_Development
Cortex	oligodendrocyte	Ageing	0.970077	perm33	oligodendrocyte_Ageing
Cortex	oligodendrocyte	Development	0.991031	perm33	oligodendrocyte_Development
Cortex	endothelial cell	Ageing	-0.586837	perm33	endothelial cell_Ageing
Cortex	endothelial cell	Development	-0.991031	perm33	endothelial cell_Development
Cortex	neuron	Ageing	-0.646718	perm33	neuron_Ageing
Cortex	neuron	Development	0.198206	perm33	neuron_Development
Cortex	medium spiny neuron	Ageing	0.335335	perm33	medium spiny neuron_Ageing
Cortex	medium spiny neuron	Development	0.954994	perm33	medium spiny neuron_Development
Cortex	interneuron	Ageing	-0.0359288	perm33	interneuron_Ageing
Cortex	interneuron	Development	0.216225	perm33	interneuron_Development
Cortex	oligodendrocyte precursor cell	Ageing	-0.826362	perm33	oligodendrocyte precursor cell_Ageing
Cortex	oligodendrocyte precursor cell	Development	-0.882919	perm33	oligodendrocyte precursor cell_Development
Cortex	neuronal stem cell	Ageing	-0.742528	perm33	neuronal stem cell_Ageing
Cortex	neuronal stem cell	Development	-0.991031	perm33	neuronal stem cell_Development
Cortex	Bergmann glial cell	Ageing	-0.359288	perm33	Bergmann glial cell_Ageing
Cortex	Bergmann glial cell	Development	0.991031	perm33	Bergmann glial cell_Development
Cortex	brain pericyte	Ageing	0.167668	perm33	brain pericyte_Ageing
Cortex	brain pericyte	Development	-0.486506	perm33	brain pericyte_Development
Cortex	CD8-positive, alpha-beta T cell	Ageing	0.658694	perm33	CD8-positive, alpha-beta T cell_Ageing
Cortex	CD8-positive, alpha-beta T cell	Development	-0.324337	perm33	CD8-positive, alpha-beta T cell_Development
Cortex	mature NK T cell	Ageing	0.670671	perm33	mature NK T cell_Ageing
Cortex	mature NK T cell	Development	-0.5766	perm33	mature NK T cell_Development
Cortex	neuroepithelial cell	Ageing	0.970077	perm33	neuroepithelial cell_Ageing
Cortex	neuroepithelial cell	Development	-0.954994	perm33	neuroepithelial cell_Development
Cortex	T cell	Ageing	0.80241	perm33	T cell_Ageing
Cortex	T cell	Development	-0.702731	perm33	T cell_Development
Cortex	ependymal cell	Ageing	-0.227549	perm34	ependymal cell_Ageing
Cortex	ependymal cell	Development	-0.414431	perm34	ependymal cell_Development
Cortex	astrocyte	Ageing	0.706599	perm34	astrocyte_Ageing
Cortex	astrocyte	Development	0.991031	perm34	astrocyte_Development
Cortex	oligodendrocyte	Ageing	0.970077	perm34	oligodendrocyte_Ageing
Cortex	oligodendrocyte	Development	0.991031	perm34	oligodendrocyte_Development
Cortex	endothelial cell	Ageing	-0.586837	perm34	endothelial cell_Ageing
Cortex	endothelial cell	Development	-0.991031	perm34	endothelial cell_Development
Cortex	neuron	Ageing	-0.646718	perm34	neuron_Ageing
Cortex	neuron	Development	0.0540562	perm34	neuron_Development
Cortex	medium spiny neuron	Ageing	0.227549	perm34	medium spiny neuron_Ageing
Cortex	medium spiny neuron	Development	0.954994	perm34	medium spiny neuron_Development
Cortex	interneuron	Ageing	0.874267	perm34	interneuron_Ageing
Cortex	interneuron	Development	0.684712	perm34	interneuron_Development
Cortex	oligodendrocyte precursor cell	Ageing	-0.598813	perm34	oligodendrocyte precursor cell_Ageing
Cortex	oligodendrocyte precursor cell	Development	-0.882919	perm34	oligodendrocyte precursor cell_Development
Cortex	neuronal stem cell	Ageing	-0.790433	perm34	neuronal stem cell_Ageing
Cortex	neuronal stem cell	Development	-0.991031	perm34	neuronal stem cell_Development
Cortex	Bergmann glial cell	Ageing	-0.586837	perm34	Bergmann glial cell_Ageing
Cortex	Bergmann glial cell	Development	0.954994	perm34	Bergmann glial cell_Development
Cortex	brain pericyte	Ageing	-0.0239525	perm34	brain pericyte_Ageing
Cortex	brain pericyte	Development	0.180187	perm34	brain pericyte_Development
Cortex	CD8-positive, alpha-beta T cell	Ageing	0.263478	perm34	CD8-positive, alpha-beta T cell_Ageing
Cortex	CD8-positive, alpha-beta T cell	Development	-0.738769	perm34	CD8-positive, alpha-beta T cell_Development
Cortex	mature NK T cell	Ageing	0.814386	perm34	mature NK T cell_Ageing
Cortex	mature NK T cell	Development	-0.378394	perm34	mature NK T cell_Development
Cortex	neuroepithelial cell	Ageing	0.0479051	perm34	neuroepithelial cell_Ageing
Cortex	neuroepithelial cell	Development	-0.612637	perm34	neuroepithelial cell_Development
Cortex	T cell	Ageing	0.850315	perm34	T cell_Ageing
Cortex	T cell	Development	0.684712	perm34	T cell_Development
Cortex	ependymal cell	Ageing	0.0838338	perm35	ependymal cell_Ageing
Cortex	ependymal cell	Development	-0.270281	perm35	ependymal cell_Development
Cortex	astrocyte	Ageing	0.754505	perm35	astrocyte_Ageing
Cortex	astrocyte	Development	0.991031	perm35	astrocyte_Development
Cortex	oligodendrocyte	Ageing	0.910196	perm35	oligodendrocyte_Ageing
Cortex	oligodendrocyte	Development	0.991031	perm35	oligodendrocyte_Development
Cortex	endothelial cell	Ageing	-0.526956	perm35	endothelial cell_Ageing
Cortex	endothelial cell	Development	-0.954994	perm35	endothelial cell_Development
Cortex	neuron	Ageing	-0.646718	perm35	neuron_Ageing
Cortex	neuron	Development	0.198206	perm35	neuron_Development
Cortex	medium spiny neuron	Ageing	0.215573	perm35	medium spiny neuron_Ageing
Cortex	medium spiny neuron	Development	0.954994	perm35	medium spiny neuron_Development
Cortex	interneuron	Ageing	0.491027	perm35	interneuron_Ageing
Cortex	interneuron	Development	0.558581	perm35	interneuron_Development
Cortex	oligodendrocyte precursor cell	Ageing	-0.814386	perm35	oligodendrocyte precursor cell_Ageing
Cortex	oligodendrocyte precursor cell	Development	-0.882919	perm35	oligodendrocyte precursor cell_Development
Cortex	neuronal stem cell	Ageing	-0.742528	perm35	neuronal stem cell_Ageing
Cortex	neuronal stem cell	Development	-0.991031	perm35	neuronal stem cell_Development
Cortex	Bergmann glial cell	Ageing	-0.646718	perm35	Bergmann glial cell_Ageing
Cortex	Bergmann glial cell	Development	0.810844	perm35	Bergmann glial cell_Development
Cortex	brain pericyte	Ageing	0.0239525	perm35	brain pericyte_Ageing
Cortex	brain pericyte	Development	-0.684712	perm35	brain pericyte_Development
Cortex	CD8-positive, alpha-beta T cell	Ageing	0.682647	perm35	CD8-positive, alpha-beta T cell_Ageing
Cortex	CD8-positive, alpha-beta T cell	Development	-0.738769	perm35	CD8-positive, alpha-beta T cell_Development
Cortex	mature NK T cell	Ageing	0.0359288	perm35	mature NK T cell_Ageing
Cortex	mature NK T cell	Development	0.360375	perm35	mature NK T cell_Development
Cortex	neuroepithelial cell	Ageing	-0.179644	perm35	neuroepithelial cell_Ageing
Cortex	neuroepithelial cell	Development	-0.882919	perm35	neuroepithelial cell_Development
Cortex	T cell	Ageing	0.838338	perm35	T cell_Ageing
Cortex	T cell	Development	0.342356	perm35	T cell_Development
Cortex	ependymal cell	Ageing	0	perm36	ependymal cell_Ageing
Cortex	ependymal cell	Development	-0.612637	perm36	ependymal cell_Development
Cortex	astrocyte	Ageing	0.0598813	perm36	astrocyte_Ageing
Cortex	astrocyte	Development	0.991031	perm36	astrocyte_Development
Cortex	oligodendrocyte	Ageing	0.874267	perm36	oligodendrocyte_Ageing
Cortex	oligodendrocyte	Development	0.991031	perm36	oligodendrocyte_Development
Cortex	endothelial cell	Ageing	-0.275454	perm36	endothelial cell_Ageing
Cortex	endothelial cell	Development	-0.846881	perm36	endothelial cell_Development
Cortex	neuron	Ageing	-0.706599	perm36	neuron_Ageing
Cortex	neuron	Development	0.126131	perm36	neuron_Development
Cortex	medium spiny neuron	Ageing	0.227549	perm36	medium spiny neuron_Ageing
Cortex	medium spiny neuron	Development	0.954994	perm36	medium spiny neuron_Development
Cortex	interneuron	Ageing	0.0119763	perm36	interneuron_Ageing
Cortex	interneuron	Development	-0.882919	perm36	interneuron_Development
Cortex	oligodendrocyte precursor cell	Ageing	-0.634742	perm36	oligodendrocyte precursor cell_Ageing
Cortex	oligodendrocyte precursor cell	Development	-0.846881	perm36	oligodendrocyte precursor cell_Development
Cortex	neuronal stem cell	Ageing	-0.790433	perm36	neuronal stem cell_Ageing
Cortex	neuronal stem cell	Development	-0.991031	perm36	neuronal stem cell_Development
Cortex	Bergmann glial cell	Ageing	0.479051	perm36	Bergmann glial cell_Ageing
Cortex	Bergmann glial cell	Development	0.991031	perm36	Bergmann glial cell_Development
Cortex	brain pericyte	Ageing	0.155691	perm36	brain pericyte_Ageing
Cortex	brain pericyte	Development	0.486506	perm36	brain pericyte_Development
Cortex	CD8-positive, alpha-beta T cell	Ageing	0.718576	perm36	CD8-positive, alpha-beta T cell_Ageing
Cortex	CD8-positive, alpha-beta T cell	Development	-0.666694	perm36	CD8-positive, alpha-beta T cell_Development
Cortex	mature NK T cell	Ageing	0.19162	perm36	mature NK T cell_Ageing
Cortex	mature NK T cell	Development	0.918956	perm36	mature NK T cell_Development
Cortex	neuroepithelial cell	Ageing	-0.299407	perm36	neuroepithelial cell_Ageing
Cortex	neuroepithelial cell	Development	-0.846881	perm36	neuroepithelial cell_Development
Cortex	T cell	Ageing	0.89822	perm36	T cell_Ageing
Cortex	T cell	Development	0.252262	perm36	T cell_Development
Cortex	ependymal cell	Ageing	0.0479051	perm37	ependymal cell_Ageing
Cortex	ependymal cell	Development	-0.0900937	perm37	ependymal cell_Development
Cortex	astrocyte	Ageing	0.634742	perm37	astrocyte_Ageing
Cortex	astrocyte	Development	0.991031	perm37	astrocyte_Development
Cortex	oligodendrocyte	Ageing	0.89822	perm37	oligodendrocyte_Ageing
Cortex	oligodendrocyte	Development	0.991031	perm37	oligodendrocyte_Development
Cortex	endothelial cell	Ageing	-0.718576	perm37	endothelial cell_Ageing
Cortex	endothelial cell	Development	-0.882919	perm37	endothelial cell_Development
Cortex	neuron	Ageing	-0.586837	perm37	neuron_Ageing
Cortex	neuron	Development	0.126131	perm37	neuron_Development
Cortex	medium spiny neuron	Ageing	0.179644	perm37	medium spiny neuron_Ageing
Cortex	medium spiny neuron	Development	0.954994	perm37	medium spiny neuron_Development
Cortex	interneuron	Ageing	0.119763	perm37	interneuron_Ageing
Cortex	interneuron	Development	0.936975	perm37	interneuron_Development
Cortex	oligodendrocyte precursor cell	Ageing	-0.706599	perm37	oligodendrocyte precursor cell_Ageing
Cortex	oligodendrocyte precursor cell	Development	-0.666694	perm37	oligodendrocyte precursor cell_Development
Cortex	neuronal stem cell	Ageing	-0.742528	perm37	neuronal stem cell_Ageing
Cortex	neuronal stem cell	Development	-0.991031	perm37	neuronal stem cell_Development
Cortex	Bergmann glial cell	Ageing	-0.598813	perm37	Bergmann glial cell_Ageing
Cortex	Bergmann glial cell	Development	0.882919	perm37	Bergmann glial cell_Development
Cortex	brain pericyte	Ageing	0.514979	perm37	brain pericyte_Ageing
Cortex	brain pericyte	Development	-0.180187	perm37	brain pericyte_Development
Cortex	CD8-positive, alpha-beta T cell	Ageing	0.395217	perm37	CD8-positive, alpha-beta T cell_Ageing
Cortex	CD8-positive, alpha-beta T cell	Development	-0.846881	perm37	CD8-positive, alpha-beta T cell_Development
Cortex	mature NK T cell	Ageing	0.574861	perm37	mature NK T cell_Ageing
Cortex	mature NK T cell	Development	0.414431	perm37	mature NK T cell_Development
Cortex	neuroepithelial cell	Ageing	0.455098	perm37	neuroepithelial cell_Ageing
Cortex	neuroepithelial cell	Development	-0.846881	perm37	neuroepithelial cell_Development
Cortex	T cell	Ageing	0.970077	perm37	T cell_Ageing
Cortex	T cell	Development	-0.666694	perm37	T cell_Development
Cortex	ependymal cell	Ageing	0.227549	perm38	ependymal cell_Ageing
Cortex	ependymal cell	Development	-0.072075	perm38	ependymal cell_Development
Cortex	astrocyte	Ageing	0.538932	perm38	astrocyte_Ageing
Cortex	astrocyte	Development	0.991031	perm38	astrocyte_Development
Cortex	oligodendrocyte	Ageing	0.970077	perm38	oligodendrocyte_Ageing
Cortex	oligodendrocyte	Development	0.991031	perm38	oligodendrocyte_Development
Cortex	endothelial cell	Ageing	-0.538932	perm38	endothelial cell_Ageing
Cortex	endothelial cell	Development	-0.991031	perm38	endothelial cell_Development
Cortex	neuron	Ageing	-0.646718	perm38	neuron_Ageing
Cortex	neuron	Development	0.198206	perm38	neuron_Development
Cortex	medium spiny neuron	Ageing	0.227549	perm38	medium spiny neuron_Ageing
Cortex	medium spiny neuron	Development	0.954994	perm38	medium spiny neuron_Development
Cortex	interneuron	Ageing	-0.658694	perm38	interneuron_Ageing
Cortex	interneuron	Development	-0.630656	perm38	interneuron_Development
Cortex	oligodendrocyte precursor cell	Ageing	-0.826362	perm38	oligodendrocyte precursor cell_Ageing
Cortex	oligodendrocyte precursor cell	Development	-0.882919	perm38	oligodendrocyte precursor cell_Development
Cortex	neuronal stem cell	Ageing	-0.790433	perm38	neuronal stem cell_Ageing
Cortex	neuronal stem cell	Development	-0.991031	perm38	neuronal stem cell_Development
Cortex	Bergmann glial cell	Ageing	-0.275454	perm38	Bergmann glial cell_Ageing
Cortex	Bergmann glial cell	Development	0.954994	perm38	Bergmann glial cell_Development
Cortex	brain pericyte	Ageing	0.227549	perm38	brain pericyte_Ageing
Cortex	brain pericyte	Development	-0.540562	perm38	brain pericyte_Development
Cortex	CD8-positive, alpha-beta T cell	Ageing	0.586837	perm38	CD8-positive, alpha-beta T cell_Ageing
Cortex	CD8-positive, alpha-beta T cell	Development	-0.666694	perm38	CD8-positive, alpha-beta T cell_Development
Cortex	mature NK T cell	Ageing	0.826362	perm38	mature NK T cell_Ageing
Cortex	mature NK T cell	Development	0.846881	perm38	mature NK T cell_Development
Cortex	neuroepithelial cell	Ageing	0.514979	perm38	neuroepithelial cell_Ageing
Cortex	neuroepithelial cell	Development	-0.936975	perm38	neuroepithelial cell_Development
Cortex	T cell	Ageing	0.89822	perm38	T cell_Ageing
Cortex	T cell	Development	0.324337	perm38	T cell_Development
Cortex	ependymal cell	Ageing	-0.359288	perm39	ependymal cell_Ageing
Cortex	ependymal cell	Development	-0.684712	perm39	ependymal cell_Development
Cortex	astrocyte	Ageing	0	perm39	astrocyte_Ageing
Cortex	astrocyte	Development	0.991031	perm39	astrocyte_Development
Cortex	oligodendrocyte	Ageing	0.89822	perm39	oligodendrocyte_Ageing
Cortex	oligodendrocyte	Development	0.991031	perm39	oligodendrocyte_Development
Cortex	endothelial cell	Ageing	-0.467074	perm39	endothelial cell_Ageing
Cortex	endothelial cell	Development	-0.738769	perm39	endothelial cell_Development
Cortex	neuron	Ageing	-0.586837	perm39	neuron_Ageing
Cortex	neuron	Development	0.522544	perm39	neuron_Development
Cortex	medium spiny neuron	Ageing	0.179644	perm39	medium spiny neuron_Ageing
Cortex	medium spiny neuron	Development	0.954994	perm39	medium spiny neuron_Development
Cortex	interneuron	Ageing	-0.251502	perm39	interneuron_Ageing
Cortex	interneuron	Development	-0.2883	perm39	interneuron_Development
Cortex	oligodendrocyte precursor cell	Ageing	-0.586837	perm39	oligodendrocyte precursor cell_Ageing
Cortex	oligodendrocyte precursor cell	Development	-0.702731	perm39	oligodendrocyte precursor cell_Development
Cortex	neuronal stem cell	Ageing	-0.790433	perm39	neuronal stem cell_Ageing
Cortex	neuronal stem cell	Development	-0.991031	perm39	neuronal stem cell_Development
Cortex	Bergmann glial cell	Ageing	-0.0598813	perm39	Bergmann glial cell_Ageing
Cortex	Bergmann glial cell	Development	0.918956	perm39	Bergmann glial cell_Development
Cortex	brain pericyte	Ageing	0.179644	perm39	brain pericyte_Ageing
Cortex	brain pericyte	Development	-0.810844	perm39	brain pericyte_Development
Cortex	CD8-positive, alpha-beta T cell	Ageing	-0.0958101	perm39	CD8-positive, alpha-beta T cell_Ageing
Cortex	CD8-positive, alpha-beta T cell	Development	-0.378394	perm39	CD8-positive, alpha-beta T cell_Development
Cortex	mature NK T cell	Ageing	0.826362	perm39	mature NK T cell_Ageing
Cortex	mature NK T cell	Development	0.522544	perm39	mature NK T cell_Development
Cortex	neuroepithelial cell	Ageing	0.419169	perm39	neuroepithelial cell_Ageing
Cortex	neuroepithelial cell	Development	-0.792825	perm39	neuroepithelial cell_Development
Cortex	T cell	Ageing	0.89822	perm39	T cell_Ageing
Cortex	T cell	Development	-0.846881	perm39	T cell_Development
Cortex	ependymal cell	Ageing	0.143715	perm40	ependymal cell_Ageing
Cortex	ependymal cell	Development	-0.270281	perm40	ependymal cell_Development
Cortex	astrocyte	Ageing	0.0239525	perm40	astrocyte_Ageing
Cortex	astrocyte	Development	0.954994	perm40	astrocyte_Development
Cortex	oligodendrocyte	Ageing	0.874267	perm40	oligodendrocyte_Ageing
Cortex	oligodendrocyte	Development	0.991031	perm40	oligodendrocyte_Development
Cortex	endothelial cell	Ageing	-0.503003	perm40	endothelial cell_Ageing
Cortex	endothelial cell	Development	-0.954994	perm40	endothelial cell_Development
Cortex	neuron	Ageing	-0.646718	perm40	neuron_Ageing
Cortex	neuron	Development	0.594619	perm40	neuron_Development
Cortex	medium spiny neuron	Ageing	0.227549	perm40	medium spiny neuron_Ageing
Cortex	medium spiny neuron	Development	0.954994	perm40	medium spiny neuron_Development
Cortex	interneuron	Ageing	0.203596	perm40	interneuron_Ageing
Cortex	interneuron	Development	-0.0540562	perm40	interneuron_Development
Cortex	oligodendrocyte precursor cell	Ageing	-0.80241	perm40	oligodendrocyte precursor cell_Ageing
Cortex	oligodendrocyte precursor cell	Development	-0.882919	perm40	oligodendrocyte precursor cell_Development
Cortex	neuronal stem cell	Ageing	-0.790433	perm40	neuronal stem cell_Ageing
Cortex	neuronal stem cell	Development	-0.991031	perm40	neuronal stem cell_Development
Cortex	Bergmann glial cell	Ageing	0.347312	perm40	Bergmann glial cell_Ageing
Cortex	Bergmann glial cell	Development	0.991031	perm40	Bergmann glial cell_Development
Cortex	brain pericyte	Ageing	0.479051	perm40	brain pericyte_Ageing
Cortex	brain pericyte	Development	-0.648675	perm40	brain pericyte_Development
Cortex	CD8-positive, alpha-beta T cell	Ageing	0.0119763	perm40	CD8-positive, alpha-beta T cell_Ageing
Cortex	CD8-positive, alpha-beta T cell	Development	-0.666694	perm40	CD8-positive, alpha-beta T cell_Development
Cortex	mature NK T cell	Ageing	0.538932	perm40	mature NK T cell_Ageing
Cortex	mature NK T cell	Development	0.396412	perm40	mature NK T cell_Development
Cortex	neuroepithelial cell	Ageing	0.0598813	perm40	neuroepithelial cell_Ageing
Cortex	neuroepithelial cell	Development	-0.882919	perm40	neuroepithelial cell_Development
Cortex	T cell	Ageing	0.922172	perm40	T cell_Ageing
Cortex	T cell	Development	0.540562	perm40	T cell_Development
Cortex	ependymal cell	Ageing	-0.0838338	perm41	ependymal cell_Ageing
Cortex	ependymal cell	Development	0.2883	perm41	ependymal cell_Development
Cortex	astrocyte	Ageing	0.119763	perm41	astrocyte_Ageing
Cortex	astrocyte	Development	0.991031	perm41	astrocyte_Development
Cortex	oligodendrocyte	Ageing	0.970077	perm41	oligodendrocyte_Ageing
Cortex	oligodendrocyte	Development	0.991031	perm41	oligodendrocyte_Development
Cortex	endothelial cell	Ageing	-0.634742	perm41	endothelial cell_Ageing
Cortex	endothelial cell	Development	-0.991031	perm41	endothelial cell_Development
Cortex	neuron	Ageing	-0.706599	perm41	neuron_Ageing
Cortex	neuron	Development	0.594619	perm41	neuron_Development
Cortex	medium spiny neuron	Ageing	0.203596	perm41	medium spiny neuron_Ageing
Cortex	medium spiny neuron	Development	0.954994	perm41	medium spiny neuron_Development
Cortex	interneuron	Ageing	0.179644	perm41	interneuron_Ageing
Cortex	interneuron	Development	-0.630656	perm41	interneuron_Development
Cortex	oligodendrocyte precursor cell	Ageing	-0.443122	perm41	oligodendrocyte precursor cell_Ageing
Cortex	oligodendrocyte precursor cell	Development	-0.666694	perm41	oligodendrocyte precursor cell_Development
Cortex	neuronal stem cell	Ageing	-0.742528	perm41	neuronal stem cell_Ageing
Cortex	neuronal stem cell	Development	-0.991031	perm41	neuronal stem cell_Development
Cortex	Bergmann glial cell	Ageing	-0.28743	perm41	Bergmann glial cell_Ageing
Cortex	Bergmann glial cell	Development	0.991031	perm41	Bergmann glial cell_Development
Cortex	brain pericyte	Ageing	0.38324	perm41	brain pericyte_Ageing
Cortex	brain pericyte	Development	-0.108112	perm41	brain pericyte_Development
Cortex	CD8-positive, alpha-beta T cell	Ageing	0.479051	perm41	CD8-positive, alpha-beta T cell_Ageing
Cortex	CD8-positive, alpha-beta T cell	Development	-0.846881	perm41	CD8-positive, alpha-beta T cell_Development
Cortex	mature NK T cell	Ageing	0.38324	perm41	mature NK T cell_Ageing
Cortex	mature NK T cell	Development	0.162169	perm41	mature NK T cell_Development
Cortex	neuroepithelial cell	Ageing	0.80241	perm41	neuroepithelial cell_Ageing
Cortex	neuroepithelial cell	Development	-0.846881	perm41	neuroepithelial cell_Development
Cortex	T cell	Ageing	0.658694	perm41	T cell_Ageing
Cortex	T cell	Development	-0.774806	perm41	T cell_Development
Cortex	ependymal cell	Ageing	0.251502	perm42	ependymal cell_Ageing
Cortex	ependymal cell	Development	-0.0180187	perm42	ependymal cell_Development
Cortex	astrocyte	Ageing	0.38324	perm42	astrocyte_Ageing
Cortex	astrocyte	Development	0.954994	perm42	astrocyte_Development
Cortex	oligodendrocyte	Ageing	0.874267	perm42	oligodendrocyte_Ageing
Cortex	oligodendrocyte	Development	0.954994	perm42	oligodendrocyte_Development
Cortex	endothelial cell	Ageing	0.239525	perm42	endothelial cell_Ageing
Cortex	endothelial cell	Development	-0.738769	perm42	endothelial cell_Development
Cortex	neuron	Ageing	-0.706599	perm42	neuron_Ageing
Cortex	neuron	Development	0.0900937	perm42	neuron_Development
Cortex	medium spiny neuron	Ageing	0.215573	perm42	medium spiny neuron_Ageing
Cortex	medium spiny neuron	Development	0.991031	perm42	medium spiny neuron_Development
Cortex	interneuron	Ageing	0.694623	perm42	interneuron_Ageing
Cortex	interneuron	Development	0.846881	perm42	interneuron_Development
Cortex	oligodendrocyte precursor cell	Ageing	-0.682647	perm42	oligodendrocyte precursor cell_Ageing
Cortex	oligodendrocyte precursor cell	Development	-0.882919	perm42	oligodendrocyte precursor cell_Development
Cortex	neuronal stem cell	Ageing	-0.742528	perm42	neuronal stem cell_Ageing
Cortex	neuronal stem cell	Development	-0.954994	perm42	neuronal stem cell_Development
Cortex	Bergmann glial cell	Ageing	-0.323359	perm42	Bergmann glial cell_Ageing
Cortex	Bergmann glial cell	Development	0.991031	perm42	Bergmann glial cell_Development
Cortex	brain pericyte	Ageing	-0.119763	perm42	brain pericyte_Ageing
Cortex	brain pericyte	Development	-0.2883	perm42	brain pericyte_Development
Cortex	CD8-positive, alpha-beta T cell	Ageing	0.19162	perm42	CD8-positive, alpha-beta T cell_Ageing
Cortex	CD8-positive, alpha-beta T cell	Development	-0.2883	perm42	CD8-positive, alpha-beta T cell_Development
Cortex	mature NK T cell	Ageing	0.610789	perm42	mature NK T cell_Ageing
Cortex	mature NK T cell	Development	-0.882919	perm42	mature NK T cell_Development
Cortex	neuroepithelial cell	Ageing	-0.335335	perm42	neuroepithelial cell_Ageing
Cortex	neuroepithelial cell	Development	-0.900937	perm42	neuroepithelial cell_Development
Cortex	T cell	Ageing	0.89822	perm42	T cell_Ageing
Cortex	T cell	Development	0.774806	perm42	T cell_Development
Cortex	ependymal cell	Ageing	-0.155691	perm43	ependymal cell_Ageing
Cortex	ependymal cell	Development	-0.792825	perm43	ependymal cell_Development
Cortex	astrocyte	Ageing	0.203596	perm43	astrocyte_Ageing
Cortex	astrocyte	Development	0.954994	perm43	astrocyte_Development
Cortex	oligodendrocyte	Ageing	0.970077	perm43	oligodendrocyte_Ageing
Cortex	oligodendrocyte	Development	0.991031	perm43	oligodendrocyte_Development
Cortex	endothelial cell	Ageing	-0.479051	perm43	endothelial cell_Ageing
Cortex	endothelial cell	Development	-0.991031	perm43	endothelial cell_Development
Cortex	neuron	Ageing	-0.646718	perm43	neuron_Ageing
Cortex	neuron	Development	0.594619	perm43	neuron_Development
Cortex	medium spiny neuron	Ageing	0.179644	perm43	medium spiny neuron_Ageing
Cortex	medium spiny neuron	Development	0.991031	perm43	medium spiny neuron_Development
Cortex	interneuron	Ageing	0.0718576	perm43	interneuron_Ageing
Cortex	interneuron	Development	0.504525	perm43	interneuron_Development
Cortex	oligodendrocyte precursor cell	Ageing	-0.646718	perm43	oligodendrocyte precursor cell_Ageing
Cortex	oligodendrocyte precursor cell	Development	-0.792825	perm43	oligodendrocyte precursor cell_Development
Cortex	neuronal stem cell	Ageing	-0.790433	perm43	neuronal stem cell_Ageing
Cortex	neuronal stem cell	Development	-0.991031	perm43	neuronal stem cell_Development
Cortex	Bergmann glial cell	Ageing	-0.658694	perm43	Bergmann glial cell_Ageing
Cortex	Bergmann glial cell	Development	0.954994	perm43	Bergmann glial cell_Development
Cortex	brain pericyte	Ageing	0.275454	perm43	brain pericyte_Ageing
Cortex	brain pericyte	Development	0.162169	perm43	brain pericyte_Development
Cortex	CD8-positive, alpha-beta T cell	Ageing	-0.0718576	perm43	CD8-positive, alpha-beta T cell_Ageing
Cortex	CD8-positive, alpha-beta T cell	Development	-0.666694	perm43	CD8-positive, alpha-beta T cell_Development
Cortex	mature NK T cell	Ageing	0.850315	perm43	mature NK T cell_Ageing
Cortex	mature NK T cell	Development	0.648675	perm43	mature NK T cell_Development
Cortex	neuroepithelial cell	Ageing	0.622766	perm43	neuroepithelial cell_Ageing
Cortex	neuroepithelial cell	Development	-0.198206	perm43	neuroepithelial cell_Development
Cortex	T cell	Ageing	0.682647	perm43	T cell_Ageing
Cortex	T cell	Development	0.684712	perm43	T cell_Development
Cortex	ependymal cell	Ageing	0.143715	perm44	ependymal cell_Ageing
Cortex	ependymal cell	Development	-0.684712	perm44	ependymal cell_Development
Cortex	astrocyte	Ageing	0.359288	perm44	astrocyte_Ageing
Cortex	astrocyte	Development	0.991031	perm44	astrocyte_Development
Cortex	oligodendrocyte	Ageing	0.910196	perm44	oligodendrocyte_Ageing
Cortex	oligodendrocyte	Development	0.991031	perm44	oligodendrocyte_Development
Cortex	endothelial cell	Ageing	-0.586837	perm44	endothelial cell_Ageing
Cortex	endothelial cell	Development	-0.954994	perm44	endothelial cell_Development
Cortex	neuron	Ageing	-0.646718	perm44	neuron_Ageing
Cortex	neuron	Development	0.486506	perm44	neuron_Development
Cortex	medium spiny neuron	Ageing	0.203596	perm44	medium spiny neuron_Ageing
Cortex	medium spiny neuron	Development	0.954994	perm44	medium spiny neuron_Development
Cortex	interneuron	Ageing	0.922172	perm44	interneuron_Ageing
Cortex	interneuron	Development	0.72075	perm44	interneuron_Development
Cortex	oligodendrocyte precursor cell	Ageing	-0.850315	perm44	oligodendrocyte precursor cell_Ageing
Cortex	oligodendrocyte precursor cell	Development	-0.882919	perm44	oligodendrocyte precursor cell_Development
Cortex	neuronal stem cell	Ageing	-0.790433	perm44	neuronal stem cell_Ageing
Cortex	neuronal stem cell	Development	-0.991031	perm44	neuronal stem cell_Development
Cortex	Bergmann glial cell	Ageing	-0.203596	perm44	Bergmann glial cell_Ageing
Cortex	Bergmann glial cell	Development	0.954994	perm44	Bergmann glial cell_Development
Cortex	brain pericyte	Ageing	0.562884	perm44	brain pericyte_Ageing
Cortex	brain pericyte	Development	0.0360375	perm44	brain pericyte_Development
Cortex	CD8-positive, alpha-beta T cell	Ageing	-0.491027	perm44	CD8-positive, alpha-beta T cell_Ageing
Cortex	CD8-positive, alpha-beta T cell	Development	-0.882919	perm44	CD8-positive, alpha-beta T cell_Development
Cortex	mature NK T cell	Ageing	0.658694	perm44	mature NK T cell_Ageing
Cortex	mature NK T cell	Development	0.846881	perm44	mature NK T cell_Development
Cortex	neuroepithelial cell	Ageing	-0.179644	perm44	neuroepithelial cell_Ageing
Cortex	neuroepithelial cell	Development	-0.882919	perm44	neuroepithelial cell_Development
Cortex	T cell	Ageing	0.922172	perm44	T cell_Ageing
Cortex	T cell	Development	-0.0180187	perm44	T cell_Development
Cortex	ependymal cell	Ageing	0.167668	perm45	ependymal cell_Ageing
Cortex	ependymal cell	Development	-0.0900937	perm45	ependymal cell_Development
Cortex	astrocyte	Ageing	0.0359288	perm45	astrocyte_Ageing
Cortex	astrocyte	Development	0.991031	perm45	astrocyte_Development
Cortex	oligodendrocyte	Ageing	0.970077	perm45	oligodendrocyte_Ageing
Cortex	oligodendrocyte	Development	0.991031	perm45	oligodendrocyte_Development
Cortex	endothelial cell	Ageing	-0.550908	perm45	endothelial cell_Ageing
Cortex	endothelial cell	Development	-0.882919	perm45	endothelial cell_Development
Cortex	neuron	Ageing	-0.646718	perm45	neuron_Ageing
Cortex	neuron	Development	0.324337	perm45	neuron_Development
Cortex	medium spiny neuron	Ageing	0.215573	perm45	medium spiny neuron_Ageing
Cortex	medium spiny neuron	Development	0.954994	perm45	medium spiny neuron_Development
Cortex	interneuron	Ageing	0.538932	perm45	interneuron_Ageing
Cortex	interneuron	Development	0.774806	perm45	interneuron_Development
Cortex	oligodendrocyte precursor cell	Ageing	-0.862291	perm45	oligodendrocyte precursor cell_Ageing
Cortex	oligodendrocyte precursor cell	Development	-0.882919	perm45	oligodendrocyte precursor cell_Development
Cortex	neuronal stem cell	Ageing	-0.778457	perm45	neuronal stem cell_Ageing
Cortex	neuronal stem cell	Development	-0.991031	perm45	neuronal stem cell_Development
Cortex	Bergmann glial cell	Ageing	0.131739	perm45	Bergmann glial cell_Ageing
Cortex	Bergmann glial cell	Development	0.991031	perm45	Bergmann glial cell_Development
Cortex	brain pericyte	Ageing	0.143715	perm45	brain pericyte_Ageing
Cortex	brain pericyte	Development	-0.252262	perm45	brain pericyte_Development
Cortex	CD8-positive, alpha-beta T cell	Ageing	0.682647	perm45	CD8-positive, alpha-beta T cell_Ageing
Cortex	CD8-positive, alpha-beta T cell	Development	-0.738769	perm45	CD8-positive, alpha-beta T cell_Development
Cortex	mature NK T cell	Ageing	0.610789	perm45	mature NK T cell_Ageing
Cortex	mature NK T cell	Development	0.342356	perm45	mature NK T cell_Development
Cortex	neuroepithelial cell	Ageing	-0.107786	perm45	neuroepithelial cell_Ageing
Cortex	neuroepithelial cell	Development	-0.882919	perm45	neuroepithelial cell_Development
Cortex	T cell	Ageing	0.946125	perm45	T cell_Ageing
Cortex	T cell	Development	-0.522544	perm45	T cell_Development
Cortex	ependymal cell	Ageing	0.0958101	perm46	ependymal cell_Ageing
Cortex	ependymal cell	Development	-0.684712	perm46	ependymal cell_Development
Cortex	astrocyte	Ageing	-0.0119763	perm46	astrocyte_Ageing
Cortex	astrocyte	Development	0.991031	perm46	astrocyte_Development
Cortex	oligodendrocyte	Ageing	0.89822	perm46	oligodendrocyte_Ageing
Cortex	oligodendrocyte	Development	0.991031	perm46	oligodendrocyte_Development
Cortex	endothelial cell	Ageing	-0.167668	perm46	endothelial cell_Ageing
Cortex	endothelial cell	Development	-0.846881	perm46	endothelial cell_Development
Cortex	neuron	Ageing	-0.586837	perm46	neuron_Ageing
Cortex	neuron	Development	0.324337	perm46	neuron_Development
Cortex	medium spiny neuron	Ageing	0.335335	perm46	medium spiny neuron_Ageing
Cortex	medium spiny neuron	Development	0.954994	perm46	medium spiny neuron_Development
Cortex	interneuron	Ageing	0.562884	perm46	interneuron_Ageing
Cortex	interneuron	Development	0.630656	perm46	interneuron_Development
Cortex	oligodendrocyte precursor cell	Ageing	-0.874267	perm46	oligodendrocyte precursor cell_Ageing
Cortex	oligodendrocyte precursor cell	Development	-0.702731	perm46	oligodendrocyte precursor cell_Development
Cortex	neuronal stem cell	Ageing	-0.790433	perm46	neuronal stem cell_Ageing
Cortex	neuronal stem cell	Development	-0.991031	perm46	neuronal stem cell_Development
Cortex	Bergmann glial cell	Ageing	-0.419169	perm46	Bergmann glial cell_Ageing
Cortex	Bergmann glial cell	Development	0.954994	perm46	Bergmann glial cell_Development
Cortex	brain pericyte	Ageing	0.431145	perm46	brain pericyte_Ageing
Cortex	brain pericyte	Development	-0.72075	perm46	brain pericyte_Development
Cortex	CD8-positive, alpha-beta T cell	Ageing	0.419169	perm46	CD8-positive, alpha-beta T cell_Ageing
Cortex	CD8-positive, alpha-beta T cell	Development	-0.666694	perm46	CD8-positive, alpha-beta T cell_Development
Cortex	mature NK T cell	Ageing	0.670671	perm46	mature NK T cell_Ageing
Cortex	mature NK T cell	Development	0.918956	perm46	mature NK T cell_Development
Cortex	neuroepithelial cell	Ageing	0.610789	perm46	neuroepithelial cell_Ageing
Cortex	neuroepithelial cell	Development	-0.828862	perm46	neuroepithelial cell_Development
Cortex	T cell	Ageing	0.754505	perm46	T cell_Ageing
Cortex	T cell	Development	-0.882919	perm46	T cell_Development
Cortex	ependymal cell	Ageing	0	perm47	ependymal cell_Ageing
Cortex	ependymal cell	Development	-0.486506	perm47	ependymal cell_Development
Cortex	astrocyte	Ageing	0.586837	perm47	astrocyte_Ageing
Cortex	astrocyte	Development	0.991031	perm47	astrocyte_Development
Cortex	oligodendrocyte	Ageing	0.874267	perm47	oligodendrocyte_Ageing
Cortex	oligodendrocyte	Development	0.991031	perm47	oligodendrocyte_Development
Cortex	endothelial cell	Ageing	-0.335335	perm47	endothelial cell_Ageing
Cortex	endothelial cell	Development	-0.954994	perm47	endothelial cell_Development
Cortex	neuron	Ageing	-0.646718	perm47	neuron_Ageing
Cortex	neuron	Development	0.0540562	perm47	neuron_Development
Cortex	medium spiny neuron	Ageing	-0.0119763	perm47	medium spiny neuron_Ageing
Cortex	medium spiny neuron	Development	0.954994	perm47	medium spiny neuron_Development
Cortex	interneuron	Ageing	0.431145	perm47	interneuron_Ageing
Cortex	interneuron	Development	0.792825	perm47	interneuron_Development
Cortex	oligodendrocyte precursor cell	Ageing	-0.754505	perm47	oligodendrocyte precursor cell_Ageing
Cortex	oligodendrocyte precursor cell	Development	-0.666694	perm47	oligodendrocyte precursor cell_Development
Cortex	neuronal stem cell	Ageing	-0.634742	perm47	neuronal stem cell_Ageing
Cortex	neuronal stem cell	Development	-0.846881	perm47	neuronal stem cell_Development
Cortex	Bergmann glial cell	Ageing	-0.562884	perm47	Bergmann glial cell_Ageing
Cortex	Bergmann glial cell	Development	0.900937	perm47	Bergmann glial cell_Development
Cortex	brain pericyte	Ageing	0.131739	perm47	brain pericyte_Ageing
Cortex	brain pericyte	Development	-0.270281	perm47	brain pericyte_Development
Cortex	CD8-positive, alpha-beta T cell	Ageing	0.251502	perm47	CD8-positive, alpha-beta T cell_Ageing
Cortex	CD8-positive, alpha-beta T cell	Development	-0.666694	perm47	CD8-positive, alpha-beta T cell_Development
Cortex	mature NK T cell	Ageing	0.610789	perm47	mature NK T cell_Ageing
Cortex	mature NK T cell	Development	-0.666694	perm47	mature NK T cell_Development
Cortex	neuroepithelial cell	Ageing	0.538932	perm47	neuroepithelial cell_Ageing
Cortex	neuroepithelial cell	Development	-0.774806	perm47	neuroepithelial cell_Development
Cortex	T cell	Ageing	0.89822	perm47	T cell_Ageing
Cortex	T cell	Development	-0.252262	perm47	T cell_Development
Cortex	ependymal cell	Ageing	0.550908	perm48	ependymal cell_Ageing
Cortex	ependymal cell	Development	-0.414431	perm48	ependymal cell_Development
Cortex	astrocyte	Ageing	-0.0119763	perm48	astrocyte_Ageing
Cortex	astrocyte	Development	0.991031	perm48	astrocyte_Development
Cortex	oligodendrocyte	Ageing	0.874267	perm48	oligodendrocyte_Ageing
Cortex	oligodendrocyte	Development	0.991031	perm48	oligodendrocyte_Development
Cortex	endothelial cell	Ageing	-0.503003	perm48	endothelial cell_Ageing
Cortex	endothelial cell	Development	-0.991031	perm48	endothelial cell_Development
Cortex	neuron	Ageing	-0.706599	perm48	neuron_Ageing
Cortex	neuron	Development	0.126131	perm48	neuron_Development
Cortex	medium spiny neuron	Ageing	0.143715	perm48	medium spiny neuron_Ageing
Cortex	medium spiny neuron	Development	0.954994	perm48	medium spiny neuron_Development
Cortex	interneuron	Ageing	-0.167668	perm48	interneuron_Ageing
Cortex	interneuron	Development	0.702731	perm48	interneuron_Development
Cortex	oligodendrocyte precursor cell	Ageing	-0.670671	perm48	oligodendrocyte precursor cell_Ageing
Cortex	oligodendrocyte precursor cell	Development	-0.882919	perm48	oligodendrocyte precursor cell_Development
Cortex	neuronal stem cell	Ageing	-0.790433	perm48	neuronal stem cell_Ageing
Cortex	neuronal stem cell	Development	-0.954994	perm48	neuronal stem cell_Development
Cortex	Bergmann glial cell	Ageing	-0.443122	perm48	Bergmann glial cell_Ageing
Cortex	Bergmann glial cell	Development	0.954994	perm48	Bergmann glial cell_Development
Cortex	brain pericyte	Ageing	0.455098	perm48	brain pericyte_Ageing
Cortex	brain pericyte	Development	-0.342356	perm48	brain pericyte_Development
Cortex	CD8-positive, alpha-beta T cell	Ageing	0.610789	perm48	CD8-positive, alpha-beta T cell_Ageing
Cortex	CD8-positive, alpha-beta T cell	Development	-0.738769	perm48	CD8-positive, alpha-beta T cell_Development
Cortex	mature NK T cell	Ageing	0.431145	perm48	mature NK T cell_Ageing
Cortex	mature NK T cell	Development	0.72075	perm48	mature NK T cell_Development
Cortex	neuroepithelial cell	Ageing	0.215573	perm48	neuroepithelial cell_Ageing
Cortex	neuroepithelial cell	Development	0.180187	perm48	neuroepithelial cell_Development
Cortex	T cell	Ageing	0.682647	perm48	T cell_Ageing
Cortex	T cell	Development	-0.0180187	perm48	T cell_Development
Cortex	ependymal cell	Ageing	0.0838338	perm49	ependymal cell_Ageing
Cortex	ependymal cell	Development	-0.684712	perm49	ependymal cell_Development
Cortex	astrocyte	Ageing	0.179644	perm49	astrocyte_Ageing
Cortex	astrocyte	Development	0.991031	perm49	astrocyte_Development
Cortex	oligodendrocyte	Ageing	0.874267	perm49	oligodendrocyte_Ageing
Cortex	oligodendrocyte	Development	0.991031	perm49	oligodendrocyte_Development
Cortex	endothelial cell	Ageing	-0.550908	perm49	endothelial cell_Ageing
Cortex	endothelial cell	Development	-0.882919	perm49	endothelial cell_Development
Cortex	neuron	Ageing	-0.766481	perm49	neuron_Ageing
Cortex	neuron	Development	0.126131	perm49	neuron_Development
Cortex	medium spiny neuron	Ageing	0.335335	perm49	medium spiny neuron_Ageing
Cortex	medium spiny neuron	Development	0.954994	perm49	medium spiny neuron_Development
Cortex	interneuron	Ageing	0.754505	perm49	interneuron_Ageing
Cortex	interneuron	Development	0.828862	perm49	interneuron_Development
Cortex	oligodendrocyte precursor cell	Ageing	-0.850315	perm49	oligodendrocyte precursor cell_Ageing
Cortex	oligodendrocyte precursor cell	Development	-0.702731	perm49	oligodendrocyte precursor cell_Development
Cortex	neuronal stem cell	Ageing	-0.742528	perm49	neuronal stem cell_Ageing
Cortex	neuronal stem cell	Development	-0.991031	perm49	neuronal stem cell_Development
Cortex	Bergmann glial cell	Ageing	-0.299407	perm49	Bergmann glial cell_Ageing
Cortex	Bergmann glial cell	Development	0.991031	perm49	Bergmann glial cell_Development
Cortex	brain pericyte	Ageing	-0.0239525	perm49	brain pericyte_Ageing
Cortex	brain pericyte	Development	-0.2883	perm49	brain pericyte_Development
Cortex	CD8-positive, alpha-beta T cell	Ageing	0.431145	perm49	CD8-positive, alpha-beta T cell_Ageing
Cortex	CD8-positive, alpha-beta T cell	Development	-0.918956	perm49	CD8-positive, alpha-beta T cell_Development
Cortex	mature NK T cell	Ageing	0.730552	perm49	mature NK T cell_Ageing
Cortex	mature NK T cell	Development	0.954994	perm49	mature NK T cell_Development
Cortex	neuroepithelial cell	Ageing	-0.119763	perm49	neuroepithelial cell_Ageing
Cortex	neuroepithelial cell	Development	-0.234244	perm49	neuroepithelial cell_Development
Cortex	T cell	Ageing	0.946125	perm49	T cell_Ageing
Cortex	T cell	Development	-0.846881	perm49	T cell_Development
Cortex	ependymal cell	Ageing	0.0838338	perm50	ependymal cell_Ageing
Cortex	ependymal cell	Development	-0.43245	perm50	ependymal cell_Development
Cortex	astrocyte	Ageing	0.275454	perm50	astrocyte_Ageing
Cortex	astrocyte	Development	0.991031	perm50	astrocyte_Development
Cortex	oligodendrocyte	Ageing	0.874267	perm50	oligodendrocyte_Ageing
Cortex	oligodendrocyte	Development	0.991031	perm50	oligodendrocyte_Development
Cortex	endothelial cell	Ageing	-0.215573	perm50	endothelial cell_Ageing
Cortex	endothelial cell	Development	-0.991031	perm50	endothelial cell_Development
Cortex	neuron	Ageing	-0.790433	perm50	neuron_Ageing
Cortex	neuron	Development	0.126131	perm50	neuron_Development
Cortex	medium spiny neuron	Ageing	0.143715	perm50	medium spiny neuron_Ageing
Cortex	medium spiny neuron	Development	0.954994	perm50	medium spiny neuron_Development
Cortex	interneuron	Ageing	0.407193	perm50	interneuron_Ageing
Cortex	interneuron	Development	0.792825	perm50	interneuron_Development
Cortex	oligodendrocyte precursor cell	Ageing	-0.778457	perm50	oligodendrocyte precursor cell_Ageing
Cortex	oligodendrocyte precursor cell	Development	-0.630656	perm50	oligodendrocyte precursor cell_Development
Cortex	neuronal stem cell	Ageing	-0.742528	perm50	neuronal stem cell_Ageing
Cortex	neuronal stem cell	Development	-0.991031	perm50	neuronal stem cell_Development
Cortex	Bergmann glial cell	Ageing	-0.706599	perm50	Bergmann glial cell_Ageing
Cortex	Bergmann glial cell	Development	0.810844	perm50	Bergmann glial cell_Development
Cortex	brain pericyte	Ageing	0.443122	perm50	brain pericyte_Ageing
Cortex	brain pericyte	Development	-0.108112	perm50	brain pericyte_Development
Cortex	CD8-positive, alpha-beta T cell	Ageing	0.275454	perm50	CD8-positive, alpha-beta T cell_Ageing
Cortex	CD8-positive, alpha-beta T cell	Development	-0.756787	perm50	CD8-positive, alpha-beta T cell_Development
Cortex	mature NK T cell	Ageing	0.299407	perm50	mature NK T cell_Ageing
Cortex	mature NK T cell	Development	0.684712	perm50	mature NK T cell_Development
Cortex	neuroepithelial cell	Ageing	-0.227549	perm50	neuroepithelial cell_Ageing
Cortex	neuroepithelial cell	Development	-0.666694	perm50	neuroepithelial cell_Development
Cortex	T cell	Ageing	0.838338	perm50	T cell_Ageing
Cortex	T cell	Development	-0.594619	perm50	T cell_Development
Cortex	ependymal cell	Ageing	0.0479051	perm51	ependymal cell_Ageing
Cortex	ependymal cell	Development	-0.0180187	perm51	ependymal cell_Development
Cortex	astrocyte	Ageing	0.0239525	perm51	astrocyte_Ageing
Cortex	astrocyte	Development	0.991031	perm51	astrocyte_Development
Cortex	oligodendrocyte	Ageing	0.970077	perm51	oligodendrocyte_Ageing
Cortex	oligodendrocyte	Development	0.991031	perm51	oligodendrocyte_Development
Cortex	endothelial cell	Ageing	-0.28743	perm51	endothelial cell_Ageing
Cortex	endothelial cell	Development	-0.882919	perm51	endothelial cell_Development
Cortex	neuron	Ageing	-0.646718	perm51	neuron_Ageing
Cortex	neuron	Development	0.396412	perm51	neuron_Development
Cortex	medium spiny neuron	Ageing	0.335335	perm51	medium spiny neuron_Ageing
Cortex	medium spiny neuron	Development	0.954994	perm51	medium spiny neuron_Development
Cortex	interneuron	Ageing	0.251502	perm51	interneuron_Ageing
Cortex	interneuron	Development	-0.522544	perm51	interneuron_Development
Cortex	oligodendrocyte precursor cell	Ageing	-0.826362	perm51	oligodendrocyte precursor cell_Ageing
Cortex	oligodendrocyte precursor cell	Development	-0.702731	perm51	oligodendrocyte precursor cell_Development
Cortex	neuronal stem cell	Ageing	-0.790433	perm51	neuronal stem cell_Ageing
Cortex	neuronal stem cell	Development	-0.991031	perm51	neuronal stem cell_Development
Cortex	Bergmann glial cell	Ageing	-0.107786	perm51	Bergmann glial cell_Ageing
Cortex	Bergmann glial cell	Development	0.954994	perm51	Bergmann glial cell_Development
Cortex	brain pericyte	Ageing	0.419169	perm51	brain pericyte_Ageing
Cortex	brain pericyte	Development	-0.324337	perm51	brain pericyte_Development
Cortex	CD8-positive, alpha-beta T cell	Ageing	0.514979	perm51	CD8-positive, alpha-beta T cell_Ageing
Cortex	CD8-positive, alpha-beta T cell	Development	-0.2883	perm51	CD8-positive, alpha-beta T cell_Development
Cortex	mature NK T cell	Ageing	0.526956	perm51	mature NK T cell_Ageing
Cortex	mature NK T cell	Development	-0.702731	perm51	mature NK T cell_Development
Cortex	neuroepithelial cell	Ageing	0.323359	perm51	neuroepithelial cell_Ageing
Cortex	neuroepithelial cell	Development	-0.954994	perm51	neuroepithelial cell_Development
Cortex	T cell	Ageing	0.730552	perm51	T cell_Ageing
Cortex	T cell	Development	-0.684712	perm51	T cell_Development
Cortex	ependymal cell	Ageing	-0.155691	perm52	ependymal cell_Ageing
Cortex	ependymal cell	Development	-0.684712	perm52	ependymal cell_Development
Cortex	astrocyte	Ageing	0.658694	perm52	astrocyte_Ageing
Cortex	astrocyte	Development	0.991031	perm52	astrocyte_Development
Cortex	oligodendrocyte	Ageing	0.89822	perm52	oligodendrocyte_Ageing
Cortex	oligodendrocyte	Development	0.991031	perm52	oligodendrocyte_Development
Cortex	endothelial cell	Ageing	-0.479051	perm52	endothelial cell_Ageing
Cortex	endothelial cell	Development	-0.630656	perm52	endothelial cell_Development
Cortex	neuron	Ageing	-0.586837	perm52	neuron_Ageing
Cortex	neuron	Development	0.324337	perm52	neuron_Development
Cortex	medium spiny neuron	Ageing	0.239525	perm52	medium spiny neuron_Ageing
Cortex	medium spiny neuron	Development	0.954994	perm52	medium spiny neuron_Development
Cortex	interneuron	Ageing	0.107786	perm52	interneuron_Ageing
Cortex	interneuron	Development	0.180187	perm52	interneuron_Development
Cortex	oligodendrocyte precursor cell	Ageing	-0.946125	perm52	oligodendrocyte precursor cell_Ageing
Cortex	oligodendrocyte precursor cell	Development	-0.666694	perm52	oligodendrocyte precursor cell_Development
Cortex	neuronal stem cell	Ageing	-0.790433	perm52	neuronal stem cell_Ageing
Cortex	neuronal stem cell	Development	-0.991031	perm52	neuronal stem cell_Development
Cortex	Bergmann glial cell	Ageing	-0.455098	perm52	Bergmann glial cell_Ageing
Cortex	Bergmann glial cell	Development	0.882919	perm52	Bergmann glial cell_Development
Cortex	brain pericyte	Ageing	0.371264	perm52	brain pericyte_Ageing
Cortex	brain pericyte	Development	0	perm52	brain pericyte_Development
Cortex	CD8-positive, alpha-beta T cell	Ageing	0.694623	perm52	CD8-positive, alpha-beta T cell_Ageing
Cortex	CD8-positive, alpha-beta T cell	Development	-0.828862	perm52	CD8-positive, alpha-beta T cell_Development
Cortex	mature NK T cell	Ageing	0.778457	perm52	mature NK T cell_Ageing
Cortex	mature NK T cell	Development	0.684712	perm52	mature NK T cell_Development
Cortex	neuroepithelial cell	Ageing	0.0359288	perm52	neuroepithelial cell_Ageing
Cortex	neuroepithelial cell	Development	-0.630656	perm52	neuroepithelial cell_Development
Cortex	T cell	Ageing	0.598813	perm52	T cell_Ageing
Cortex	T cell	Development	-0.738769	perm52	T cell_Development
Cortex	ependymal cell	Ageing	-0.215573	perm53	ependymal cell_Ageing
Cortex	ependymal cell	Development	0.0900937	perm53	ependymal cell_Development
Cortex	astrocyte	Ageing	0.610789	perm53	astrocyte_Ageing
Cortex	astrocyte	Development	0.991031	perm53	astrocyte_Development
Cortex	oligodendrocyte	Ageing	0.874267	perm53	oligodendrocyte_Ageing
Cortex	oligodendrocyte	Development	0.991031	perm53	oligodendrocyte_Development
Cortex	endothelial cell	Ageing	-0.239525	perm53	endothelial cell_Ageing
Cortex	endothelial cell	Development	-0.882919	perm53	endothelial cell_Development
Cortex	neuron	Ageing	-0.586837	perm53	neuron_Ageing
Cortex	neuron	Development	0.396412	perm53	neuron_Development
Cortex	medium spiny neuron	Ageing	0.203596	perm53	medium spiny neuron_Ageing
Cortex	medium spiny neuron	Development	0.954994	perm53	medium spiny neuron_Development
Cortex	interneuron	Ageing	0.155691	perm53	interneuron_Ageing
Cortex	interneuron	Development	0.900937	perm53	interneuron_Development
Cortex	oligodendrocyte precursor cell	Ageing	-0.790433	perm53	oligodendrocyte precursor cell_Ageing
Cortex	oligodendrocyte precursor cell	Development	-0.702731	perm53	oligodendrocyte precursor cell_Development
Cortex	neuronal stem cell	Ageing	-0.634742	perm53	neuronal stem cell_Ageing
Cortex	neuronal stem cell	Development	-0.991031	perm53	neuronal stem cell_Development
Cortex	Bergmann glial cell	Ageing	-0.538932	perm53	Bergmann glial cell_Ageing
Cortex	Bergmann glial cell	Development	0.738769	perm53	Bergmann glial cell_Development
Cortex	brain pericyte	Ageing	0.491027	perm53	brain pericyte_Ageing
Cortex	brain pericyte	Development	-0.486506	perm53	brain pericyte_Development
Cortex	CD8-positive, alpha-beta T cell	Ageing	0.311383	perm53	CD8-positive, alpha-beta T cell_Ageing
Cortex	CD8-positive, alpha-beta T cell	Development	-0.846881	perm53	CD8-positive, alpha-beta T cell_Development
Cortex	mature NK T cell	Ageing	0.730552	perm53	mature NK T cell_Ageing
Cortex	mature NK T cell	Development	-0.828862	perm53	mature NK T cell_Development
Cortex	neuroepithelial cell	Ageing	0.203596	perm53	neuroepithelial cell_Ageing
Cortex	neuroepithelial cell	Development	-0.991031	perm53	neuroepithelial cell_Development
Cortex	T cell	Ageing	0.778457	perm53	T cell_Ageing
Cortex	T cell	Development	0.198206	perm53	T cell_Development
Cortex	ependymal cell	Ageing	0.0479051	perm54	ependymal cell_Ageing
Cortex	ependymal cell	Development	-0.486506	perm54	ependymal cell_Development
Cortex	astrocyte	Ageing	0.670671	perm54	astrocyte_Ageing
Cortex	astrocyte	Development	0.991031	perm54	astrocyte_Development
Cortex	oligodendrocyte	Ageing	0.970077	perm54	oligodendrocyte_Ageing
Cortex	oligodendrocyte	Development	0.991031	perm54	oligodendrocyte_Development
Cortex	endothelial cell	Ageing	-0.443122	perm54	endothelial cell_Ageing
Cortex	endothelial cell	Development	-0.882919	perm54	endothelial cell_Development
Cortex	neuron	Ageing	-0.706599	perm54	neuron_Ageing
Cortex	neuron	Development	0.396412	perm54	neuron_Development
Cortex	medium spiny neuron	Ageing	0.359288	perm54	medium spiny neuron_Ageing
Cortex	medium spiny neuron	Development	0.954994	perm54	medium spiny neuron_Development
Cortex	interneuron	Ageing	0.0359288	perm54	interneuron_Ageing
Cortex	interneuron	Development	0.43245	perm54	interneuron_Development
Cortex	oligodendrocyte precursor cell	Ageing	-0.670671	perm54	oligodendrocyte precursor cell_Ageing
Cortex	oligodendrocyte precursor cell	Development	-0.702731	perm54	oligodendrocyte precursor cell_Development
Cortex	neuronal stem cell	Ageing	-0.790433	perm54	neuronal stem cell_Ageing
Cortex	neuronal stem cell	Development	-0.991031	perm54	neuronal stem cell_Development
Cortex	Bergmann glial cell	Ageing	-0.586837	perm54	Bergmann glial cell_Ageing
Cortex	Bergmann glial cell	Development	0.954994	perm54	Bergmann glial cell_Development
Cortex	brain pericyte	Ageing	0.431145	perm54	brain pericyte_Ageing
Cortex	brain pericyte	Development	-0.180187	perm54	brain pericyte_Development
Cortex	CD8-positive, alpha-beta T cell	Ageing	0.503003	perm54	CD8-positive, alpha-beta T cell_Ageing
Cortex	CD8-positive, alpha-beta T cell	Development	-0.666694	perm54	CD8-positive, alpha-beta T cell_Development
Cortex	mature NK T cell	Ageing	0.706599	perm54	mature NK T cell_Ageing
Cortex	mature NK T cell	Development	-0.0180187	perm54	mature NK T cell_Development
Cortex	neuroepithelial cell	Ageing	0.586837	perm54	neuroepithelial cell_Ageing
Cortex	neuroepithelial cell	Development	-0.882919	perm54	neuroepithelial cell_Development
Cortex	T cell	Ageing	0.89822	perm54	T cell_Ageing
Cortex	T cell	Development	-0.324337	perm54	T cell_Development
Cortex	ependymal cell	Ageing	0.19162	perm55	ependymal cell_Ageing
Cortex	ependymal cell	Development	0.0900937	perm55	ependymal cell_Development
Cortex	astrocyte	Ageing	0.610789	perm55	astrocyte_Ageing
Cortex	astrocyte	Development	0.991031	perm55	astrocyte_Development
Cortex	oligodendrocyte	Ageing	0.874267	perm55	oligodendrocyte_Ageing
Cortex	oligodendrocyte	Development	0.991031	perm55	oligodendrocyte_Development
Cortex	endothelial cell	Ageing	-0.526956	perm55	endothelial cell_Ageing
Cortex	endothelial cell	Development	-0.882919	perm55	endothelial cell_Development
Cortex	neuron	Ageing	-0.586837	perm55	neuron_Ageing
Cortex	neuron	Development	0.43245	perm55	neuron_Development
Cortex	medium spiny neuron	Ageing	0.215573	perm55	medium spiny neuron_Ageing
Cortex	medium spiny neuron	Development	0.954994	perm55	medium spiny neuron_Development
Cortex	interneuron	Ageing	0.155691	perm55	interneuron_Ageing
Cortex	interneuron	Development	-0.522544	perm55	interneuron_Development
Cortex	oligodendrocyte precursor cell	Ageing	-0.850315	perm55	oligodendrocyte precursor cell_Ageing
Cortex	oligodendrocyte precursor cell	Development	-0.666694	perm55	oligodendrocyte precursor cell_Development
Cortex	neuronal stem cell	Ageing	-0.742528	perm55	neuronal stem cell_Ageing
Cortex	neuronal stem cell	Development	-0.954994	perm55	neuronal stem cell_Development
Cortex	Bergmann glial cell	Ageing	-0.514979	perm55	Bergmann glial cell_Ageing
Cortex	Bergmann glial cell	Development	0.991031	perm55	Bergmann glial cell_Development
Cortex	brain pericyte	Ageing	0.0958101	perm55	brain pericyte_Ageing
Cortex	brain pericyte	Development	-0.450469	perm55	brain pericyte_Development
Cortex	CD8-positive, alpha-beta T cell	Ageing	0.275454	perm55	CD8-positive, alpha-beta T cell_Ageing
Cortex	CD8-positive, alpha-beta T cell	Development	-0.846881	perm55	CD8-positive, alpha-beta T cell_Development
Cortex	mature NK T cell	Ageing	0.311383	perm55	mature NK T cell_Ageing
Cortex	mature NK T cell	Development	0.900937	perm55	mature NK T cell_Development
Cortex	neuroepithelial cell	Ageing	0.0718576	perm55	neuroepithelial cell_Ageing
Cortex	neuroepithelial cell	Development	-0.738769	perm55	neuroepithelial cell_Development
Cortex	T cell	Ageing	0.874267	perm55	T cell_Ageing
Cortex	T cell	Development	0.108112	perm55	T cell_Development
Cortex	ependymal cell	Ageing	-0.179644	perm56	ependymal cell_Ageing
Cortex	ependymal cell	Development	-0.414431	perm56	ependymal cell_Development
Cortex	astrocyte	Ageing	0.431145	perm56	astrocyte_Ageing
Cortex	astrocyte	Development	0.991031	perm56	astrocyte_Development
Cortex	oligodendrocyte	Ageing	0.970077	perm56	oligodendrocyte_Ageing
Cortex	oligodendrocyte	Development	0.991031	perm56	oligodendrocyte_Development
Cortex	endothelial cell	Ageing	-0.371264	perm56	endothelial cell_Ageing
Cortex	endothelial cell	Development	-0.954994	perm56	endothelial cell_Development
Cortex	neuron	Ageing	-0.706599	perm56	neuron_Ageing
Cortex	neuron	Development	0.396412	perm56	neuron_Development
Cortex	medium spiny neuron	Ageing	0.203596	perm56	medium spiny neuron_Ageing
Cortex	medium spiny neuron	Development	0.954994	perm56	medium spiny neuron_Development
Cortex	interneuron	Ageing	0.646718	perm56	interneuron_Ageing
Cortex	interneuron	Development	0.216225	perm56	interneuron_Development
Cortex	oligodendrocyte precursor cell	Ageing	-0.742528	perm56	oligodendrocyte precursor cell_Ageing
Cortex	oligodendrocyte precursor cell	Development	-0.702731	perm56	oligodendrocyte precursor cell_Development
Cortex	neuronal stem cell	Ageing	-0.790433	perm56	neuronal stem cell_Ageing
Cortex	neuronal stem cell	Development	-0.991031	perm56	neuronal stem cell_Development
Cortex	Bergmann glial cell	Ageing	-0.682647	perm56	Bergmann glial cell_Ageing
Cortex	Bergmann glial cell	Development	0.882919	perm56	Bergmann glial cell_Development
Cortex	brain pericyte	Ageing	0.455098	perm56	brain pericyte_Ageing
Cortex	brain pericyte	Development	-0.684712	perm56	brain pericyte_Development
Cortex	CD8-positive, alpha-beta T cell	Ageing	0.526956	perm56	CD8-positive, alpha-beta T cell_Ageing
Cortex	CD8-positive, alpha-beta T cell	Development	-0.846881	perm56	CD8-positive, alpha-beta T cell_Development
Cortex	mature NK T cell	Ageing	0.622766	perm56	mature NK T cell_Ageing
Cortex	mature NK T cell	Development	0.900937	perm56	mature NK T cell_Development
Cortex	neuroepithelial cell	Ageing	-0.0838338	perm56	neuroepithelial cell_Ageing
Cortex	neuroepithelial cell	Development	-0.630656	perm56	neuroepithelial cell_Development
Cortex	T cell	Ageing	0.874267	perm56	T cell_Ageing
Cortex	T cell	Development	-0.738769	perm56	T cell_Development
Cortex	ependymal cell	Ageing	0.155691	perm57	ependymal cell_Ageing
Cortex	ependymal cell	Development	-0.684712	perm57	ependymal cell_Development
Cortex	astrocyte	Ageing	0.407193	perm57	astrocyte_Ageing
Cortex	astrocyte	Development	0.991031	perm57	astrocyte_Development
Cortex	oligodendrocyte	Ageing	0.874267	perm57	oligodendrocyte_Ageing
Cortex	oligodendrocyte	Development	0.991031	perm57	oligodendrocyte_Development
Cortex	endothelial cell	Ageing	-0.503003	perm57	endothelial cell_Ageing
Cortex	endothelial cell	Development	-0.846881	perm57	endothelial cell_Development
Cortex	neuron	Ageing	-0.706599	perm57	neuron_Ageing
Cortex	neuron	Development	0.630656	perm57	neuron_Development
Cortex	medium spiny neuron	Ageing	0.179644	perm57	medium spiny neuron_Ageing
Cortex	medium spiny neuron	Development	0.954994	perm57	medium spiny neuron_Development
Cortex	interneuron	Ageing	0.215573	perm57	interneuron_Ageing
Cortex	interneuron	Development	-0.991031	perm57	interneuron_Development
Cortex	oligodendrocyte precursor cell	Ageing	-0.754505	perm57	oligodendrocyte precursor cell_Ageing
Cortex	oligodendrocyte precursor cell	Development	-0.702731	perm57	oligodendrocyte precursor cell_Development
Cortex	neuronal stem cell	Ageing	-0.742528	perm57	neuronal stem cell_Ageing
Cortex	neuronal stem cell	Development	-0.991031	perm57	neuronal stem cell_Development
Cortex	Bergmann glial cell	Ageing	0.0239525	perm57	Bergmann glial cell_Ageing
Cortex	Bergmann glial cell	Development	0.954994	perm57	Bergmann glial cell_Development
Cortex	brain pericyte	Ageing	0.263478	perm57	brain pericyte_Ageing
Cortex	brain pericyte	Development	-0.270281	perm57	brain pericyte_Development
Cortex	CD8-positive, alpha-beta T cell	Ageing	0.491027	perm57	CD8-positive, alpha-beta T cell_Ageing
Cortex	CD8-positive, alpha-beta T cell	Development	-0.882919	perm57	CD8-positive, alpha-beta T cell_Development
Cortex	mature NK T cell	Ageing	0.574861	perm57	mature NK T cell_Ageing
Cortex	mature NK T cell	Development	0.936975	perm57	mature NK T cell_Development
Cortex	neuroepithelial cell	Ageing	-0.347312	perm57	neuroepithelial cell_Ageing
Cortex	neuroepithelial cell	Development	-0.882919	perm57	neuroepithelial cell_Development
Cortex	T cell	Ageing	0.922172	perm57	T cell_Ageing
Cortex	T cell	Development	0.522544	perm57	T cell_Development
Cortex	ependymal cell	Ageing	0.455098	perm58	ependymal cell_Ageing
Cortex	ependymal cell	Development	0.504525	perm58	ependymal cell_Development
Cortex	astrocyte	Ageing	0.586837	perm58	astrocyte_Ageing
Cortex	astrocyte	Development	0.991031	perm58	astrocyte_Development
Cortex	oligodendrocyte	Ageing	0.89822	perm58	oligodendrocyte_Ageing
Cortex	oligodendrocyte	Development	0.991031	perm58	oligodendrocyte_Development
Cortex	endothelial cell	Ageing	-0.155691	perm58	endothelial cell_Ageing
Cortex	endothelial cell	Development	-0.774806	perm58	endothelial cell_Development
Cortex	neuron	Ageing	-0.646718	perm58	neuron_Ageing
Cortex	neuron	Development	0.324337	perm58	neuron_Development
Cortex	medium spiny neuron	Ageing	0.179644	perm58	medium spiny neuron_Ageing
Cortex	medium spiny neuron	Development	0.991031	perm58	medium spiny neuron_Development
Cortex	interneuron	Ageing	0.0239525	perm58	interneuron_Ageing
Cortex	interneuron	Development	-0.216225	perm58	interneuron_Development
Cortex	oligodendrocyte precursor cell	Ageing	-0.467074	perm58	oligodendrocyte precursor cell_Ageing
Cortex	oligodendrocyte precursor cell	Development	-0.882919	perm58	oligodendrocyte precursor cell_Development
Cortex	neuronal stem cell	Ageing	-0.790433	perm58	neuronal stem cell_Ageing
Cortex	neuronal stem cell	Development	-0.954994	perm58	neuronal stem cell_Development
Cortex	Bergmann glial cell	Ageing	-0.467074	perm58	Bergmann glial cell_Ageing
Cortex	Bergmann glial cell	Development	-0.756787	perm58	Bergmann glial cell_Development
Cortex	brain pericyte	Ageing	-0.0718576	perm58	brain pericyte_Ageing
Cortex	brain pericyte	Development	-0.900937	perm58	brain pericyte_Development
Cortex	CD8-positive, alpha-beta T cell	Ageing	0.275454	perm58	CD8-positive, alpha-beta T cell_Ageing
Cortex	CD8-positive, alpha-beta T cell	Development	-0.594619	perm58	CD8-positive, alpha-beta T cell_Development
Cortex	mature NK T cell	Ageing	0.503003	perm58	mature NK T cell_Ageing
Cortex	mature NK T cell	Development	-0.0180187	perm58	mature NK T cell_Development
Cortex	neuroepithelial cell	Ageing	0.28743	perm58	neuroepithelial cell_Ageing
Cortex	neuroepithelial cell	Development	-0.666694	perm58	neuroepithelial cell_Development
Cortex	T cell	Ageing	0.89822	perm58	T cell_Ageing
Cortex	T cell	Development	-0.846881	perm58	T cell_Development
Cortex	ependymal cell	Ageing	0.0958101	perm59	ependymal cell_Ageing
Cortex	ependymal cell	Development	0.504525	perm59	ependymal cell_Development
Cortex	astrocyte	Ageing	0.646718	perm59	astrocyte_Ageing
Cortex	astrocyte	Development	0.954994	perm59	astrocyte_Development
Cortex	oligodendrocyte	Ageing	0.89822	perm59	oligodendrocyte_Ageing
Cortex	oligodendrocyte	Development	0.991031	perm59	oligodendrocyte_Development
Cortex	endothelial cell	Ageing	-0.622766	perm59	endothelial cell_Ageing
Cortex	endothelial cell	Development	-0.882919	perm59	endothelial cell_Development
Cortex	neuron	Ageing	-0.586837	perm59	neuron_Ageing
Cortex	neuron	Development	0.630656	perm59	neuron_Development
Cortex	medium spiny neuron	Ageing	0.167668	perm59	medium spiny neuron_Ageing
Cortex	medium spiny neuron	Development	0.954994	perm59	medium spiny neuron_Development
Cortex	interneuron	Ageing	-0.275454	perm59	interneuron_Ageing
Cortex	interneuron	Development	0.0900937	perm59	interneuron_Development
Cortex	oligodendrocyte precursor cell	Ageing	-0.682647	perm59	oligodendrocyte precursor cell_Ageing
Cortex	oligodendrocyte precursor cell	Development	-0.702731	perm59	oligodendrocyte precursor cell_Development
Cortex	neuronal stem cell	Ageing	-0.718576	perm59	neuronal stem cell_Ageing
Cortex	neuronal stem cell	Development	-0.991031	perm59	neuronal stem cell_Development
Cortex	Bergmann glial cell	Ageing	-0.359288	perm59	Bergmann glial cell_Ageing
Cortex	Bergmann glial cell	Development	0.954994	perm59	Bergmann glial cell_Development
Cortex	brain pericyte	Ageing	0.215573	perm59	brain pericyte_Ageing
Cortex	brain pericyte	Development	-0.306319	perm59	brain pericyte_Development
Cortex	CD8-positive, alpha-beta T cell	Ageing	0.455098	perm59	CD8-positive, alpha-beta T cell_Ageing
Cortex	CD8-positive, alpha-beta T cell	Development	-0.738769	perm59	CD8-positive, alpha-beta T cell_Development
Cortex	mature NK T cell	Ageing	0.323359	perm59	mature NK T cell_Ageing
Cortex	mature NK T cell	Development	-0.738769	perm59	mature NK T cell_Development
Cortex	neuroepithelial cell	Ageing	0.874267	perm59	neuroepithelial cell_Ageing
Cortex	neuroepithelial cell	Development	-0.954994	perm59	neuroepithelial cell_Development
Cortex	T cell	Ageing	0.970077	perm59	T cell_Ageing
Cortex	T cell	Development	0.450469	perm59	T cell_Development
Cortex	ependymal cell	Ageing	0.215573	perm60	ependymal cell_Ageing
Cortex	ependymal cell	Development	-0.072075	perm60	ependymal cell_Development
Cortex	astrocyte	Ageing	0.718576	perm60	astrocyte_Ageing
Cortex	astrocyte	Development	0.991031	perm60	astrocyte_Development
Cortex	oligodendrocyte	Ageing	0.89822	perm60	oligodendrocyte_Ageing
Cortex	oligodendrocyte	Development	0.991031	perm60	oligodendrocyte_Development
Cortex	endothelial cell	Ageing	-0.0359288	perm60	endothelial cell_Ageing
Cortex	endothelial cell	Development	-0.846881	perm60	endothelial cell_Development
Cortex	neuron	Ageing	-0.586837	perm60	neuron_Ageing
Cortex	neuron	Development	0.594619	perm60	neuron_Development
Cortex	medium spiny neuron	Ageing	0.203596	perm60	medium spiny neuron_Ageing
Cortex	medium spiny neuron	Development	0.954994	perm60	medium spiny neuron_Development
Cortex	interneuron	Ageing	0.347312	perm60	interneuron_Ageing
Cortex	interneuron	Development	-0.828862	perm60	interneuron_Development
Cortex	oligodendrocyte precursor cell	Ageing	-0.946125	perm60	oligodendrocyte precursor cell_Ageing
Cortex	oligodendrocyte precursor cell	Development	-0.792825	perm60	oligodendrocyte precursor cell_Development
Cortex	neuronal stem cell	Ageing	-0.742528	perm60	neuronal stem cell_Ageing
Cortex	neuronal stem cell	Development	-0.991031	perm60	neuronal stem cell_Development
Cortex	Bergmann glial cell	Ageing	-0.455098	perm60	Bergmann glial cell_Ageing
Cortex	Bergmann glial cell	Development	0.882919	perm60	Bergmann glial cell_Development
Cortex	brain pericyte	Ageing	0.179644	perm60	brain pericyte_Ageing
Cortex	brain pericyte	Development	-0.108112	perm60	brain pericyte_Development
Cortex	CD8-positive, alpha-beta T cell	Ageing	0.395217	perm60	CD8-positive, alpha-beta T cell_Ageing
Cortex	CD8-positive, alpha-beta T cell	Development	-0.738769	perm60	CD8-positive, alpha-beta T cell_Development
Cortex	mature NK T cell	Ageing	0.562884	perm60	mature NK T cell_Ageing
Cortex	mature NK T cell	Development	0.612637	perm60	mature NK T cell_Development
Cortex	neuroepithelial cell	Ageing	0.467074	perm60	neuroepithelial cell_Ageing
Cortex	neuroepithelial cell	Development	-0.738769	perm60	neuroepithelial cell_Development
Cortex	T cell	Ageing	0.80241	perm60	T cell_Ageing
Cortex	T cell	Development	0.774806	perm60	T cell_Development
Cortex	ependymal cell	Ageing	0.395217	perm61	ependymal cell_Ageing
Cortex	ependymal cell	Development	-0.0900937	perm61	ependymal cell_Development
Cortex	astrocyte	Ageing	0	perm61	astrocyte_Ageing
Cortex	astrocyte	Development	0.991031	perm61	astrocyte_Development
Cortex	oligodendrocyte	Ageing	0.89822	perm61	oligodendrocyte_Ageing
Cortex	oligodendrocyte	Development	0.991031	perm61	oligodendrocyte_Development
Cortex	endothelial cell	Ageing	-0.455098	perm61	endothelial cell_Ageing
Cortex	endothelial cell	Development	-0.991031	perm61	endothelial cell_Development
Cortex	neuron	Ageing	-0.646718	perm61	neuron_Ageing
Cortex	neuron	Development	0.0900937	perm61	neuron_Development
Cortex	medium spiny neuron	Ageing	0.215573	perm61	medium spiny neuron_Ageing
Cortex	medium spiny neuron	Development	0.954994	perm61	medium spiny neuron_Development
Cortex	interneuron	Ageing	0.562884	perm61	interneuron_Ageing
Cortex	interneuron	Development	0.900937	perm61	interneuron_Development
Cortex	oligodendrocyte precursor cell	Ageing	-0.670671	perm61	oligodendrocyte precursor cell_Ageing
Cortex	oligodendrocyte precursor cell	Development	-0.666694	perm61	oligodendrocyte precursor cell_Development
Cortex	neuronal stem cell	Ageing	-0.814386	perm61	neuronal stem cell_Ageing
Cortex	neuronal stem cell	Development	-0.991031	perm61	neuronal stem cell_Development
Cortex	Bergmann glial cell	Ageing	-0.347312	perm61	Bergmann glial cell_Ageing
Cortex	Bergmann glial cell	Development	0.991031	perm61	Bergmann glial cell_Development
Cortex	brain pericyte	Ageing	0.323359	perm61	brain pericyte_Ageing
Cortex	brain pericyte	Development	-0.306319	perm61	brain pericyte_Development
Cortex	CD8-positive, alpha-beta T cell	Ageing	0.491027	perm61	CD8-positive, alpha-beta T cell_Ageing
Cortex	CD8-positive, alpha-beta T cell	Development	0.396412	perm61	CD8-positive, alpha-beta T cell_Development
Cortex	mature NK T cell	Ageing	0.610789	perm61	mature NK T cell_Ageing
Cortex	mature NK T cell	Development	-0.0540562	perm61	mature NK T cell_Development
Cortex	neuroepithelial cell	Ageing	0.538932	perm61	neuroepithelial cell_Ageing
Cortex	neuroepithelial cell	Development	-0.954994	perm61	neuroepithelial cell_Development
Cortex	T cell	Ageing	0.922172	perm61	T cell_Ageing
Cortex	T cell	Development	-0.882919	perm61	T cell_Development
Cortex	ependymal cell	Ageing	0.514979	perm62	ependymal cell_Ageing
Cortex	ependymal cell	Development	0.612637	perm62	ependymal cell_Development
Cortex	astrocyte	Ageing	0.107786	perm62	astrocyte_Ageing
Cortex	astrocyte	Development	0.954994	perm62	astrocyte_Development
Cortex	oligodendrocyte	Ageing	0.910196	perm62	oligodendrocyte_Ageing
Cortex	oligodendrocyte	Development	0.991031	perm62	oligodendrocyte_Development
Cortex	endothelial cell	Ageing	-0.347312	perm62	endothelial cell_Ageing
Cortex	endothelial cell	Development	-0.954994	perm62	endothelial cell_Development
Cortex	neuron	Ageing	-0.586837	perm62	neuron_Ageing
Cortex	neuron	Development	0.198206	perm62	neuron_Development
Cortex	medium spiny neuron	Ageing	0.0718576	perm62	medium spiny neuron_Ageing
Cortex	medium spiny neuron	Development	0.954994	perm62	medium spiny neuron_Development
Cortex	interneuron	Ageing	0.634742	perm62	interneuron_Ageing
Cortex	interneuron	Development	0.900937	perm62	interneuron_Development
Cortex	oligodendrocyte precursor cell	Ageing	-0.850315	perm62	oligodendrocyte precursor cell_Ageing
Cortex	oligodendrocyte precursor cell	Development	-0.702731	perm62	oligodendrocyte precursor cell_Development
Cortex	neuronal stem cell	Ageing	-0.970077	perm62	neuronal stem cell_Ageing
Cortex	neuronal stem cell	Development	-0.991031	perm62	neuronal stem cell_Development
Cortex	Bergmann glial cell	Ageing	0.119763	perm62	Bergmann glial cell_Ageing
Cortex	Bergmann glial cell	Development	0.0900937	perm62	Bergmann glial cell_Development
Cortex	brain pericyte	Ageing	0.239525	perm62	brain pericyte_Ageing
Cortex	brain pericyte	Development	-0.0360375	perm62	brain pericyte_Development
Cortex	CD8-positive, alpha-beta T cell	Ageing	0.610789	perm62	CD8-positive, alpha-beta T cell_Ageing
Cortex	CD8-positive, alpha-beta T cell	Development	-0.738769	perm62	CD8-positive, alpha-beta T cell_Development
Cortex	mature NK T cell	Ageing	0.299407	perm62	mature NK T cell_Ageing
Cortex	mature NK T cell	Development	-0.0900937	perm62	mature NK T cell_Development
Cortex	neuroepithelial cell	Ageing	0.239525	perm62	neuroepithelial cell_Ageing
Cortex	neuroepithelial cell	Development	-0.738769	perm62	neuroepithelial cell_Development
Cortex	T cell	Ageing	0.89822	perm62	T cell_Ageing
Cortex	T cell	Development	-0.0180187	perm62	T cell_Development
Cortex	ependymal cell	Ageing	0.155691	perm63	ependymal cell_Ageing
Cortex	ependymal cell	Development	-0.43245	perm63	ependymal cell_Development
Cortex	astrocyte	Ageing	0.646718	perm63	astrocyte_Ageing
Cortex	astrocyte	Development	0.991031	perm63	astrocyte_Development
Cortex	oligodendrocyte	Ageing	0.99403	perm63	oligodendrocyte_Ageing
Cortex	oligodendrocyte	Development	0.954994	perm63	oligodendrocyte_Development
Cortex	endothelial cell	Ageing	-0.203596	perm63	endothelial cell_Ageing
Cortex	endothelial cell	Development	-0.954994	perm63	endothelial cell_Development
Cortex	neuron	Ageing	-0.646718	perm63	neuron_Ageing
Cortex	neuron	Development	0.630656	perm63	neuron_Development
Cortex	medium spiny neuron	Ageing	0.179644	perm63	medium spiny neuron_Ageing
Cortex	medium spiny neuron	Development	0.991031	perm63	medium spiny neuron_Development
Cortex	interneuron	Ageing	0.167668	perm63	interneuron_Ageing
Cortex	interneuron	Development	0.14415	perm63	interneuron_Development
Cortex	oligodendrocyte precursor cell	Ageing	-0.742528	perm63	oligodendrocyte precursor cell_Ageing
Cortex	oligodendrocyte precursor cell	Development	-0.702731	perm63	oligodendrocyte precursor cell_Development
Cortex	neuronal stem cell	Ageing	-0.706599	perm63	neuronal stem cell_Ageing
Cortex	neuronal stem cell	Development	-0.954994	perm63	neuronal stem cell_Development
Cortex	Bergmann glial cell	Ageing	-0.503003	perm63	Bergmann glial cell_Ageing
Cortex	Bergmann glial cell	Development	0.882919	perm63	Bergmann glial cell_Development
Cortex	brain pericyte	Ageing	0.167668	perm63	brain pericyte_Ageing
Cortex	brain pericyte	Development	-0.2883	perm63	brain pericyte_Development
Cortex	CD8-positive, alpha-beta T cell	Ageing	0.347312	perm63	CD8-positive, alpha-beta T cell_Ageing
Cortex	CD8-positive, alpha-beta T cell	Development	0.198206	perm63	CD8-positive, alpha-beta T cell_Development
Cortex	mature NK T cell	Ageing	0.562884	perm63	mature NK T cell_Ageing
Cortex	mature NK T cell	Development	0.738769	perm63	mature NK T cell_Development
Cortex	neuroepithelial cell	Ageing	0.347312	perm63	neuroepithelial cell_Ageing
Cortex	neuroepithelial cell	Development	-0.828862	perm63	neuroepithelial cell_Development
Cortex	T cell	Ageing	0.89822	perm63	T cell_Ageing
Cortex	T cell	Development	-0.612637	perm63	T cell_Development
Cortex	ependymal cell	Ageing	0.0359288	perm64	ependymal cell_Ageing
Cortex	ependymal cell	Development	-0.162169	perm64	ependymal cell_Development
Cortex	astrocyte	Ageing	0.610789	perm64	astrocyte_Ageing
Cortex	astrocyte	Development	0.991031	perm64	astrocyte_Development
Cortex	oligodendrocyte	Ageing	0.874267	perm64	oligodendrocyte_Ageing
Cortex	oligodendrocyte	Development	0.991031	perm64	oligodendrocyte_Development
Cortex	endothelial cell	Ageing	-0.431145	perm64	endothelial cell_Ageing
Cortex	endothelial cell	Development	-0.991031	perm64	endothelial cell_Development
Cortex	neuron	Ageing	-0.586837	perm64	neuron_Ageing
Cortex	neuron	Development	0.43245	perm64	neuron_Development
Cortex	medium spiny neuron	Ageing	0.275454	perm64	medium spiny neuron_Ageing
Cortex	medium spiny neuron	Development	0.954994	perm64	medium spiny neuron_Development
Cortex	interneuron	Ageing	0.239525	perm64	interneuron_Ageing
Cortex	interneuron	Development	0.810844	perm64	interneuron_Development
Cortex	oligodendrocyte precursor cell	Ageing	-0.718576	perm64	oligodendrocyte precursor cell_Ageing
Cortex	oligodendrocyte precursor cell	Development	-0.702731	perm64	oligodendrocyte precursor cell_Development
Cortex	neuronal stem cell	Ageing	-0.790433	perm64	neuronal stem cell_Ageing
Cortex	neuronal stem cell	Development	-0.991031	perm64	neuronal stem cell_Development
Cortex	Bergmann glial cell	Ageing	-0.28743	perm64	Bergmann glial cell_Ageing
Cortex	Bergmann glial cell	Development	-0.558581	perm64	Bergmann glial cell_Development
Cortex	brain pericyte	Ageing	0.419169	perm64	brain pericyte_Ageing
Cortex	brain pericyte	Development	0.306319	perm64	brain pericyte_Development
Cortex	CD8-positive, alpha-beta T cell	Ageing	0.622766	perm64	CD8-positive, alpha-beta T cell_Ageing
Cortex	CD8-positive, alpha-beta T cell	Development	0.360375	perm64	CD8-positive, alpha-beta T cell_Development
Cortex	mature NK T cell	Ageing	0.886243	perm64	mature NK T cell_Ageing
Cortex	mature NK T cell	Development	0.954994	perm64	mature NK T cell_Development
Cortex	neuroepithelial cell	Ageing	0.514979	perm64	neuroepithelial cell_Ageing
Cortex	neuroepithelial cell	Development	-0.828862	perm64	neuroepithelial cell_Development
Cortex	T cell	Ageing	0.730552	perm64	T cell_Ageing
Cortex	T cell	Development	-0.738769	perm64	T cell_Development
Cortex	ependymal cell	Ageing	-0.28743	perm65	ependymal cell_Ageing
Cortex	ependymal cell	Development	-0.684712	perm65	ependymal cell_Development
Cortex	astrocyte	Ageing	0.395217	perm65	astrocyte_Ageing
Cortex	astrocyte	Development	0.991031	perm65	astrocyte_Development
Cortex	oligodendrocyte	Ageing	0.874267	perm65	oligodendrocyte_Ageing
Cortex	oligodendrocyte	Development	0.991031	perm65	oligodendrocyte_Development
Cortex	endothelial cell	Ageing	-0.754505	perm65	endothelial cell_Ageing
Cortex	endothelial cell	Development	-0.954994	perm65	endothelial cell_Development
Cortex	neuron	Ageing	-0.766481	perm65	neuron_Ageing
Cortex	neuron	Development	0.396412	perm65	neuron_Development
Cortex	medium spiny neuron	Ageing	0.335335	perm65	medium spiny neuron_Ageing
Cortex	medium spiny neuron	Development	0.954994	perm65	medium spiny neuron_Development
Cortex	interneuron	Ageing	-0.203596	perm65	interneuron_Ageing
Cortex	interneuron	Development	0.774806	perm65	interneuron_Development
Cortex	oligodendrocyte precursor cell	Ageing	-0.371264	perm65	oligodendrocyte precursor cell_Ageing
Cortex	oligodendrocyte precursor cell	Development	-0.666694	perm65	oligodendrocyte precursor cell_Development
Cortex	neuronal stem cell	Ageing	-0.790433	perm65	neuronal stem cell_Ageing
Cortex	neuronal stem cell	Development	-0.991031	perm65	neuronal stem cell_Development
Cortex	Bergmann glial cell	Ageing	0.0119763	perm65	Bergmann glial cell_Ageing
Cortex	Bergmann glial cell	Development	0.991031	perm65	Bergmann glial cell_Development
Cortex	brain pericyte	Ageing	0.443122	perm65	brain pericyte_Ageing
Cortex	brain pericyte	Development	-0.270281	perm65	brain pericyte_Development
Cortex	CD8-positive, alpha-beta T cell	Ageing	0.550908	perm65	CD8-positive, alpha-beta T cell_Ageing
Cortex	CD8-positive, alpha-beta T cell	Development	-0.0180187	perm65	CD8-positive, alpha-beta T cell_Development
Cortex	mature NK T cell	Ageing	0.455098	perm65	mature NK T cell_Ageing
Cortex	mature NK T cell	Development	-0.396412	perm65	mature NK T cell_Development
Cortex	neuroepithelial cell	Ageing	0.407193	perm65	neuroepithelial cell_Ageing
Cortex	neuroepithelial cell	Development	-0.558581	perm65	neuroepithelial cell_Development
Cortex	T cell	Ageing	0.89822	perm65	T cell_Ageing
Cortex	T cell	Development	-0.558581	perm65	T cell_Development
Cortex	ependymal cell	Ageing	-0.179644	perm66	ependymal cell_Ageing
Cortex	ependymal cell	Development	-0.738769	perm66	ependymal cell_Development
Cortex	astrocyte	Ageing	0.526956	perm66	astrocyte_Ageing
Cortex	astrocyte	Development	0.991031	perm66	astrocyte_Development
Cortex	oligodendrocyte	Ageing	0.874267	perm66	oligodendrocyte_Ageing
Cortex	oligodendrocyte	Development	0.991031	perm66	oligodendrocyte_Development
Cortex	endothelial cell	Ageing	-0.251502	perm66	endothelial cell_Ageing
Cortex	endothelial cell	Development	-0.882919	perm66	endothelial cell_Development
Cortex	neuron	Ageing	-0.646718	perm66	neuron_Ageing
Cortex	neuron	Development	0.0900937	perm66	neuron_Development
Cortex	medium spiny neuron	Ageing	0.0119763	perm66	medium spiny neuron_Ageing
Cortex	medium spiny neuron	Development	0.991031	perm66	medium spiny neuron_Development
Cortex	interneuron	Ageing	-0.0359288	perm66	interneuron_Ageing
Cortex	interneuron	Development	0.936975	perm66	interneuron_Development
Cortex	oligodendrocyte precursor cell	Ageing	-0.562884	perm66	oligodendrocyte precursor cell_Ageing
Cortex	oligodendrocyte precursor cell	Development	-0.666694	perm66	oligodendrocyte precursor cell_Development
Cortex	neuronal stem cell	Ageing	-0.790433	perm66	neuronal stem cell_Ageing
Cortex	neuronal stem cell	Development	-0.991031	perm66	neuronal stem cell_Development
Cortex	Bergmann glial cell	Ageing	-0.167668	perm66	Bergmann glial cell_Ageing
Cortex	Bergmann glial cell	Development	0.882919	perm66	Bergmann glial cell_Development
Cortex	brain pericyte	Ageing	0.503003	perm66	brain pericyte_Ageing
Cortex	brain pericyte	Development	-0.324337	perm66	brain pericyte_Development
Cortex	CD8-positive, alpha-beta T cell	Ageing	0.467074	perm66	CD8-positive, alpha-beta T cell_Ageing
Cortex	CD8-positive, alpha-beta T cell	Development	-0.558581	perm66	CD8-positive, alpha-beta T cell_Development
Cortex	mature NK T cell	Ageing	0.503003	perm66	mature NK T cell_Ageing
Cortex	mature NK T cell	Development	-0.846881	perm66	mature NK T cell_Development
Cortex	neuroepithelial cell	Ageing	0.850315	perm66	neuroepithelial cell_Ageing
Cortex	neuroepithelial cell	Development	-0.882919	perm66	neuroepithelial cell_Development
Cortex	T cell	Ageing	0.778457	perm66	T cell_Ageing
Cortex	T cell	Development	-0.666694	perm66	T cell_Development
Cortex	ependymal cell	Ageing	0.0479051	perm67	ependymal cell_Ageing
Cortex	ependymal cell	Development	0.0900937	perm67	ependymal cell_Development
Cortex	astrocyte	Ageing	0.179644	perm67	astrocyte_Ageing
Cortex	astrocyte	Development	0.991031	perm67	astrocyte_Development
Cortex	oligodendrocyte	Ageing	0.874267	perm67	oligodendrocyte_Ageing
Cortex	oligodendrocyte	Development	0.991031	perm67	oligodendrocyte_Development
Cortex	endothelial cell	Ageing	-0.467074	perm67	endothelial cell_Ageing
Cortex	endothelial cell	Development	-0.954994	perm67	endothelial cell_Development
Cortex	neuron	Ageing	-0.586837	perm67	neuron_Ageing
Cortex	neuron	Development	0.324337	perm67	neuron_Development
Cortex	medium spiny neuron	Ageing	0.179644	perm67	medium spiny neuron_Ageing
Cortex	medium spiny neuron	Development	0.954994	perm67	medium spiny neuron_Development
Cortex	interneuron	Ageing	0.526956	perm67	interneuron_Ageing
Cortex	interneuron	Development	0.846881	perm67	interneuron_Development
Cortex	oligodendrocyte precursor cell	Ageing	-0.646718	perm67	oligodendrocyte precursor cell_Ageing
Cortex	oligodendrocyte precursor cell	Development	-0.702731	perm67	oligodendrocyte precursor cell_Development
Cortex	neuronal stem cell	Ageing	-0.790433	perm67	neuronal stem cell_Ageing
Cortex	neuronal stem cell	Development	-0.954994	perm67	neuronal stem cell_Development
Cortex	Bergmann glial cell	Ageing	-0.203596	perm67	Bergmann glial cell_Ageing
[truncated: 28,001 more rows]

## Sheet: sdata6
tissue	cell type	period	Perms	perm	cols
Liver	mature NK T cell	Ageing	-0.764733	perm1	mature NK T cell_Ageing
Liver	mature NK T cell	Development	-0.666694	perm1	mature NK T cell_Development
Liver	T cell	Ageing	0.512623	perm1	T cell_Ageing
Liver	T cell	Development	-0.991031	perm1	T cell_Development
Liver	B cell	Ageing	0.722715	perm1	B cell_Ageing
Liver	B cell	Development	-0.991031	perm1	B cell_Development
Liver	CD4-positive, alpha-beta T cell	Ageing	-0.789944	perm1	CD4-positive, alpha-beta T cell_Ageing
Liver	CD4-positive, alpha-beta T cell	Development	-0.918956	perm1	CD4-positive, alpha-beta T cell_Development
Liver	NK cell	Ageing	0.840366	perm1	NK cell_Ageing
Liver	NK cell	Development	-0.486506	perm1	NK cell_Development
Liver	neutrophil	Ageing	0.756329	perm1	neutrophil_Ageing
Liver	neutrophil	Development	-0.738769	perm1	neutrophil_Development
Liver	hepatocyte	Ageing	-0.6891	perm1	hepatocyte_Ageing
Liver	hepatocyte	Development	0.954994	perm1	hepatocyte_Development
Liver	endothelial cell of hepatic sinusoid	Ageing	-0.87398	perm1	endothelial cell of hepatic sinusoid_Ageing
Liver	endothelial cell of hepatic sinusoid	Development	0.558581	perm1	endothelial cell of hepatic sinusoid_Development
Liver	Kupffer cell	Ageing	0.621871	perm1	Kupffer cell_Ageing
Liver	Kupffer cell	Development	-0.846881	perm1	Kupffer cell_Development
Liver	myeloid leukocyte	Ageing	0.537834	perm1	myeloid leukocyte_Ageing
Liver	myeloid leukocyte	Development	-0.882919	perm1	myeloid leukocyte_Development
Liver	mature NK T cell	Ageing	0.176477	perm2	mature NK T cell_Ageing
Liver	mature NK T cell	Development	-0.684712	perm2	mature NK T cell_Development
Liver	T cell	Ageing	0.672293	perm2	T cell_Ageing
Liver	T cell	Development	-0.991031	perm2	T cell_Development
Liver	B cell	Ageing	0.605063	perm2	B cell_Ageing
Liver	B cell	Development	-0.846881	perm2	B cell_Development
Liver	CD4-positive, alpha-beta T cell	Ageing	0.117651	perm2	CD4-positive, alpha-beta T cell_Ageing
Liver	CD4-positive, alpha-beta T cell	Development	-0.774806	perm2	CD4-positive, alpha-beta T cell_Development
Liver	NK cell	Ageing	0.378165	perm2	NK cell_Ageing
Liver	NK cell	Development	0.396412	perm2	NK cell_Development
Liver	neutrophil	Ageing	0.731118	perm2	neutrophil_Ageing
Liver	neutrophil	Development	-0.738769	perm2	neutrophil_Development
Liver	hepatocyte	Ageing	-0.773137	perm2	hepatocyte_Ageing
Liver	hepatocyte	Development	0.954994	perm2	hepatocyte_Development
Liver	endothelial cell of hepatic sinusoid	Ageing	-0.840366	perm2	endothelial cell of hepatic sinusoid_Ageing
Liver	endothelial cell of hepatic sinusoid	Development	0.630656	perm2	endothelial cell of hepatic sinusoid_Development
Liver	Kupffer cell	Ageing	0.638678	perm2	Kupffer cell_Ageing
Liver	Kupffer cell	Development	-0.882919	perm2	Kupffer cell_Development
Liver	myeloid leukocyte	Ageing	-0.0588256	perm2	myeloid leukocyte_Ageing
Liver	myeloid leukocyte	Development	-0.882919	perm2	myeloid leukocyte_Development
Liver	mature NK T cell	Ageing	-0.462201	perm3	mature NK T cell_Ageing
Liver	mature NK T cell	Development	-0.738769	perm3	mature NK T cell_Development
Liver	T cell	Ageing	0.605063	perm3	T cell_Ageing
Liver	T cell	Development	-0.991031	perm3	T cell_Development
Liver	B cell	Ageing	0.823558	perm3	B cell_Ageing
Liver	B cell	Development	-0.846881	perm3	B cell_Development
Liver	CD4-positive, alpha-beta T cell	Ageing	-0.714311	perm3	CD4-positive, alpha-beta T cell_Ageing
Liver	CD4-positive, alpha-beta T cell	Development	-0.738769	perm3	CD4-positive, alpha-beta T cell_Development
Liver	NK cell	Ageing	0.0840366	perm3	NK cell_Ageing
Liver	NK cell	Development	-0.666694	perm3	NK cell_Development
Liver	neutrophil	Ageing	0.714311	perm3	neutrophil_Ageing
Liver	neutrophil	Development	-0.666694	perm3	neutrophil_Development
Liver	hepatocyte	Ageing	-0.773137	perm3	hepatocyte_Ageing
Liver	hepatocyte	Development	0.882919	perm3	hepatocyte_Development
Liver	endothelial cell of hepatic sinusoid	Ageing	-0.857173	perm3	endothelial cell of hepatic sinusoid_Ageing
Liver	endothelial cell of hepatic sinusoid	Development	0.396412	perm3	endothelial cell of hepatic sinusoid_Development
Liver	Kupffer cell	Ageing	0.663889	perm3	Kupffer cell_Ageing
Liver	Kupffer cell	Development	-0.882919	perm3	Kupffer cell_Development
Liver	myeloid leukocyte	Ageing	-0.201688	perm3	myeloid leukocyte_Ageing
Liver	myeloid leukocyte	Development	-0.666694	perm3	myeloid leukocyte_Development
Liver	mature NK T cell	Ageing	0.15967	perm4	mature NK T cell_Ageing
Liver	mature NK T cell	Development	-0.666694	perm4	mature NK T cell_Development
Liver	T cell	Ageing	0.705907	perm4	T cell_Ageing
Liver	T cell	Development	-0.991031	perm4	T cell_Development
Liver	B cell	Ageing	0.638678	perm4	B cell_Ageing
Liver	B cell	Development	-0.846881	perm4	B cell_Development
Liver	CD4-positive, alpha-beta T cell	Ageing	-0.638678	perm4	CD4-positive, alpha-beta T cell_Ageing
Liver	CD4-positive, alpha-beta T cell	Development	-0.630656	perm4	CD4-positive, alpha-beta T cell_Development
Liver	NK cell	Ageing	0.361357	perm4	NK cell_Ageing
Liver	NK cell	Development	-0.846881	perm4	NK cell_Development
Liver	neutrophil	Ageing	0.739522	perm4	neutrophil_Ageing
Liver	neutrophil	Development	-0.846881	perm4	neutrophil_Development
Liver	hepatocyte	Ageing	-0.6891	perm4	hepatocyte_Ageing
Liver	hepatocyte	Development	0.954994	perm4	hepatocyte_Development
Liver	endothelial cell of hepatic sinusoid	Ageing	-0.899191	perm4	endothelial cell of hepatic sinusoid_Ageing
Liver	endothelial cell of hepatic sinusoid	Development	0.558581	perm4	endothelial cell of hepatic sinusoid_Development
Liver	Kupffer cell	Ageing	0.638678	perm4	Kupffer cell_Ageing
Liver	Kupffer cell	Development	-0.846881	perm4	Kupffer cell_Development
Liver	myeloid leukocyte	Ageing	-0.630274	perm4	myeloid leukocyte_Ageing
Liver	myeloid leukocyte	Development	-0.666694	perm4	myeloid leukocyte_Development
Liver	mature NK T cell	Ageing	-0.151266	perm5	mature NK T cell_Ageing
Liver	mature NK T cell	Development	-0.630656	perm5	mature NK T cell_Development
Liver	T cell	Ageing	0.201688	perm5	T cell_Ageing
Liver	T cell	Development	-0.991031	perm5	T cell_Development
Liver	B cell	Ageing	0.78154	perm5	B cell_Ageing
Liver	B cell	Development	-0.954994	perm5	B cell_Development
Liver	CD4-positive, alpha-beta T cell	Ageing	-0.78154	perm5	CD4-positive, alpha-beta T cell_Ageing
Liver	CD4-positive, alpha-beta T cell	Development	-0.486506	perm5	CD4-positive, alpha-beta T cell_Development
Liver	NK cell	Ageing	0.0756329	perm5	NK cell_Ageing
Liver	NK cell	Development	-0.954994	perm5	NK cell_Development
Liver	neutrophil	Ageing	0.680696	perm5	neutrophil_Ageing
Liver	neutrophil	Development	-0.738769	perm5	neutrophil_Development
Liver	hepatocyte	Ageing	-0.773137	perm5	hepatocyte_Ageing
Liver	hepatocyte	Development	0.954994	perm5	hepatocyte_Development
Liver	endothelial cell of hepatic sinusoid	Ageing	-0.915999	perm5	endothelial cell of hepatic sinusoid_Ageing
Liver	endothelial cell of hepatic sinusoid	Development	0.558581	perm5	endothelial cell of hepatic sinusoid_Development
Liver	Kupffer cell	Ageing	0.621871	perm5	Kupffer cell_Ageing
Liver	Kupffer cell	Development	-0.882919	perm5	Kupffer cell_Development
Liver	myeloid leukocyte	Ageing	0.352954	perm5	myeloid leukocyte_Ageing
Liver	myeloid leukocyte	Development	-0.738769	perm5	myeloid leukocyte_Development
Liver	mature NK T cell	Ageing	0.218495	perm6	mature NK T cell_Ageing
Liver	mature NK T cell	Development	-0.846881	perm6	mature NK T cell_Development
Liver	T cell	Ageing	0.647082	perm6	T cell_Ageing
Liver	T cell	Development	-0.991031	perm6	T cell_Development
Liver	B cell	Ageing	0.638678	perm6	B cell_Ageing
Liver	B cell	Development	-0.846881	perm6	B cell_Development
Liver	CD4-positive, alpha-beta T cell	Ageing	-0.663889	perm6	CD4-positive, alpha-beta T cell_Ageing
Liver	CD4-positive, alpha-beta T cell	Development	-0.666694	perm6	CD4-positive, alpha-beta T cell_Development
Liver	NK cell	Ageing	0.378165	perm6	NK cell_Ageing
Liver	NK cell	Development	-0.666694	perm6	NK cell_Development
Liver	neutrophil	Ageing	0.731118	perm6	neutrophil_Ageing
Liver	neutrophil	Development	-0.630656	perm6	neutrophil_Development
Liver	hepatocyte	Ageing	-0.773137	perm6	hepatocyte_Ageing
Liver	hepatocyte	Development	0.954994	perm6	hepatocyte_Development
Liver	endothelial cell of hepatic sinusoid	Ageing	-0.899191	perm6	endothelial cell of hepatic sinusoid_Ageing
Liver	endothelial cell of hepatic sinusoid	Development	0.558581	perm6	endothelial cell of hepatic sinusoid_Development
Liver	Kupffer cell	Ageing	0.638678	perm6	Kupffer cell_Ageing
Liver	Kupffer cell	Development	-0.846881	perm6	Kupffer cell_Development
Liver	myeloid leukocyte	Ageing	0.285724	perm6	myeloid leukocyte_Ageing
Liver	myeloid leukocyte	Development	-0.738769	perm6	myeloid leukocyte_Development
Liver	mature NK T cell	Ageing	0.277321	perm7	mature NK T cell_Ageing
Liver	mature NK T cell	Development	-0.2883	perm7	mature NK T cell_Development
Liver	T cell	Ageing	0.705907	perm7	T cell_Ageing
Liver	T cell	Development	-0.991031	perm7	T cell_Development
Liver	B cell	Ageing	0.739522	perm7	B cell_Ageing
Liver	B cell	Development	-0.882919	perm7	B cell_Development
Liver	CD4-positive, alpha-beta T cell	Ageing	-0.59666	perm7	CD4-positive, alpha-beta T cell_Ageing
Liver	CD4-positive, alpha-beta T cell	Development	-0.414431	perm7	CD4-positive, alpha-beta T cell_Development
Liver	NK cell	Ageing	-0.18488	perm7	NK cell_Ageing
Liver	NK cell	Development	-0.666694	perm7	NK cell_Development
Liver	neutrophil	Ageing	0.722715	perm7	neutrophil_Ageing
Liver	neutrophil	Development	-0.738769	perm7	neutrophil_Development
Liver	hepatocyte	Ageing	-0.739522	perm7	hepatocyte_Ageing
Liver	hepatocyte	Development	0.954994	perm7	hepatocyte_Development
Liver	endothelial cell of hepatic sinusoid	Ageing	-0.840366	perm7	endothelial cell of hepatic sinusoid_Ageing
Liver	endothelial cell of hepatic sinusoid	Development	0.738769	perm7	endothelial cell of hepatic sinusoid_Development
Liver	Kupffer cell	Ageing	0.621871	perm7	Kupffer cell_Ageing
Liver	Kupffer cell	Development	-0.882919	perm7	Kupffer cell_Development
Liver	myeloid leukocyte	Ageing	0.0168073	perm7	myeloid leukocyte_Ageing
Liver	myeloid leukocyte	Development	-0.846881	perm7	myeloid leukocyte_Development
Liver	mature NK T cell	Ageing	0.731118	perm8	mature NK T cell_Ageing
Liver	mature NK T cell	Development	-0.666694	perm8	mature NK T cell_Development
Liver	T cell	Ageing	0.94121	perm8	T cell_Ageing
Liver	T cell	Development	-0.991031	perm8	T cell_Development
Liver	B cell	Ageing	-0.0168073	perm8	B cell_Ageing
Liver	B cell	Development	-0.594619	perm8	B cell_Development
Liver	CD4-positive, alpha-beta T cell	Ageing	-0.235302	perm8	CD4-positive, alpha-beta T cell_Ageing
Liver	CD4-positive, alpha-beta T cell	Development	-0.810844	perm8	CD4-positive, alpha-beta T cell_Development
Liver	NK cell	Ageing	-0.403376	perm8	NK cell_Ageing
Liver	NK cell	Development	-0.684712	perm8	NK cell_Development
Liver	neutrophil	Ageing	0.739522	perm8	neutrophil_Ageing
Liver	neutrophil	Development	-0.738769	perm8	neutrophil_Development
Liver	hepatocyte	Ageing	-0.663889	perm8	hepatocyte_Ageing
Liver	hepatocyte	Development	0.954994	perm8	hepatocyte_Development
Liver	endothelial cell of hepatic sinusoid	Ageing	-0.857173	perm8	endothelial cell of hepatic sinusoid_Ageing
Liver	endothelial cell of hepatic sinusoid	Development	0.558581	perm8	endothelial cell of hepatic sinusoid_Development
Liver	Kupffer cell	Ageing	0.663889	perm8	Kupffer cell_Ageing
Liver	Kupffer cell	Development	-0.882919	perm8	Kupffer cell_Development
Liver	myeloid leukocyte	Ageing	-0.319339	perm8	myeloid leukocyte_Ageing
Liver	myeloid leukocyte	Development	-0.702731	perm8	myeloid leukocyte_Development
Liver	mature NK T cell	Ageing	0.176477	perm9	mature NK T cell_Ageing
Liver	mature NK T cell	Development	-0.991031	perm9	mature NK T cell_Development
Liver	T cell	Ageing	0.789944	perm9	T cell_Ageing
Liver	T cell	Development	-0.991031	perm9	T cell_Development
Liver	B cell	Ageing	0.605063	perm9	B cell_Ageing
Liver	B cell	Development	-0.954994	perm9	B cell_Development
Liver	CD4-positive, alpha-beta T cell	Ageing	-0.613467	perm9	CD4-positive, alpha-beta T cell_Ageing
Liver	CD4-positive, alpha-beta T cell	Development	-0.450469	perm9	CD4-positive, alpha-beta T cell_Development
Liver	NK cell	Ageing	0.352954	perm9	NK cell_Ageing
Liver	NK cell	Development	-0.630656	perm9	NK cell_Development
Liver	neutrophil	Ageing	0.705907	perm9	neutrophil_Ageing
Liver	neutrophil	Development	-0.846881	perm9	neutrophil_Development
Liver	hepatocyte	Ageing	-0.747926	perm9	hepatocyte_Ageing
Liver	hepatocyte	Development	0.954994	perm9	hepatocyte_Development
Liver	endothelial cell of hepatic sinusoid	Ageing	-0.87398	perm9	endothelial cell of hepatic sinusoid_Ageing
Liver	endothelial cell of hepatic sinusoid	Development	0.396412	perm9	endothelial cell of hepatic sinusoid_Development
Liver	Kupffer cell	Ageing	0.6891	perm9	Kupffer cell_Ageing
Liver	Kupffer cell	Development	-0.846881	perm9	Kupffer cell_Development
Liver	myeloid leukocyte	Ageing	-0.462201	perm9	myeloid leukocyte_Ageing
Liver	myeloid leukocyte	Development	-0.738769	perm9	myeloid leukocyte_Development
Liver	mature NK T cell	Ageing	0.0756329	perm10	mature NK T cell_Ageing
Liver	mature NK T cell	Development	-0.828862	perm10	mature NK T cell_Development
Liver	T cell	Ageing	0.672293	perm10	T cell_Ageing
Liver	T cell	Development	-0.991031	perm10	T cell_Development
Liver	B cell	Ageing	0.537834	perm10	B cell_Ageing
Liver	B cell	Development	-0.954994	perm10	B cell_Development
Liver	CD4-positive, alpha-beta T cell	Ageing	-0.78154	perm10	CD4-positive, alpha-beta T cell_Ageing
Liver	CD4-positive, alpha-beta T cell	Development	-0.918956	perm10	CD4-positive, alpha-beta T cell_Development
Liver	NK cell	Ageing	0.369761	perm10	NK cell_Ageing
Liver	NK cell	Development	-0.774806	perm10	NK cell_Development
Liver	neutrophil	Ageing	0.605063	perm10	neutrophil_Ageing
Liver	neutrophil	Development	-0.666694	perm10	neutrophil_Development
Liver	hepatocyte	Ageing	-0.663889	perm10	hepatocyte_Ageing
Liver	hepatocyte	Development	0.954994	perm10	hepatocyte_Development
Liver	endothelial cell of hepatic sinusoid	Ageing	-0.848769	perm10	endothelial cell of hepatic sinusoid_Ageing
Liver	endothelial cell of hepatic sinusoid	Development	0.666694	perm10	endothelial cell of hepatic sinusoid_Development
Liver	Kupffer cell	Ageing	0.621871	perm10	Kupffer cell_Ageing
Liver	Kupffer cell	Development	-0.846881	perm10	Kupffer cell_Development
Liver	myeloid leukocyte	Ageing	0.420183	perm10	myeloid leukocyte_Ageing
Liver	myeloid leukocyte	Development	-0.666694	perm10	myeloid leukocyte_Development
Liver	mature NK T cell	Ageing	-0.798348	perm11	mature NK T cell_Ageing
Liver	mature NK T cell	Development	-0.126131	perm11	mature NK T cell_Development
Liver	T cell	Ageing	0.747926	perm11	T cell_Ageing
Liver	T cell	Development	-0.991031	perm11	T cell_Development
Liver	B cell	Ageing	0.789944	perm11	B cell_Ageing
Liver	B cell	Development	-0.954994	perm11	B cell_Development
Liver	CD4-positive, alpha-beta T cell	Ageing	-0.6891	perm11	CD4-positive, alpha-beta T cell_Ageing
Liver	CD4-positive, alpha-beta T cell	Development	-0.882919	perm11	CD4-positive, alpha-beta T cell_Development
Liver	NK cell	Ageing	0.285724	perm11	NK cell_Ageing
Liver	NK cell	Development	-0.738769	perm11	NK cell_Development
Liver	neutrophil	Ageing	0.638678	perm11	neutrophil_Ageing
Liver	neutrophil	Development	-0.666694	perm11	neutrophil_Development
Liver	hepatocyte	Ageing	-0.705907	perm11	hepatocyte_Ageing
Liver	hepatocyte	Development	0.954994	perm11	hepatocyte_Development
Liver	endothelial cell of hepatic sinusoid	Ageing	-0.857173	perm11	endothelial cell of hepatic sinusoid_Ageing
Liver	endothelial cell of hepatic sinusoid	Development	0.558581	perm11	endothelial cell of hepatic sinusoid_Development
Liver	Kupffer cell	Ageing	0.621871	perm11	Kupffer cell_Ageing
Liver	Kupffer cell	Development	-0.882919	perm11	Kupffer cell_Development
Liver	myeloid leukocyte	Ageing	0.109248	perm11	myeloid leukocyte_Ageing
Liver	myeloid leukocyte	Development	-0.882919	perm11	myeloid leukocyte_Development
Liver	mature NK T cell	Ageing	0.310935	perm12	mature NK T cell_Ageing
Liver	mature NK T cell	Development	-0.666694	perm12	mature NK T cell_Development
Liver	T cell	Ageing	0.638678	perm12	T cell_Ageing
Liver	T cell	Development	-0.991031	perm12	T cell_Development
Liver	B cell	Ageing	0.705907	perm12	B cell_Ageing
Liver	B cell	Development	-0.954994	perm12	B cell_Development
Liver	CD4-positive, alpha-beta T cell	Ageing	-0.630274	perm12	CD4-positive, alpha-beta T cell_Ageing
Liver	CD4-positive, alpha-beta T cell	Development	-0.882919	perm12	CD4-positive, alpha-beta T cell_Development
Liver	NK cell	Ageing	0.697504	perm12	NK cell_Ageing
Liver	NK cell	Development	-0.684712	perm12	NK cell_Development
Liver	neutrophil	Ageing	0.756329	perm12	neutrophil_Ageing
Liver	neutrophil	Development	-0.666694	perm12	neutrophil_Development
Liver	hepatocyte	Ageing	-0.747926	perm12	hepatocyte_Ageing
Liver	hepatocyte	Development	0.954994	perm12	hepatocyte_Development
Liver	endothelial cell of hepatic sinusoid	Ageing	-0.857173	perm12	endothelial cell of hepatic sinusoid_Ageing
Liver	endothelial cell of hepatic sinusoid	Development	0.666694	perm12	endothelial cell of hepatic sinusoid_Development
Liver	Kupffer cell	Ageing	0.697504	perm12	Kupffer cell_Ageing
Liver	Kupffer cell	Development	-0.810844	perm12	Kupffer cell_Development
Liver	myeloid leukocyte	Ageing	-0.142862	perm12	myeloid leukocyte_Ageing
Liver	myeloid leukocyte	Development	-0.846881	perm12	myeloid leukocyte_Development
Liver	mature NK T cell	Ageing	-0.680696	perm13	mature NK T cell_Ageing
Liver	mature NK T cell	Development	-0.2883	perm13	mature NK T cell_Development
Liver	T cell	Ageing	0.680696	perm13	T cell_Ageing
Liver	T cell	Development	-0.991031	perm13	T cell_Development
Liver	B cell	Ageing	0.890788	perm13	B cell_Ageing
Liver	B cell	Development	-0.882919	perm13	B cell_Development
Liver	CD4-positive, alpha-beta T cell	Ageing	-0.815155	perm13	CD4-positive, alpha-beta T cell_Ageing
Liver	CD4-positive, alpha-beta T cell	Development	-0.486506	perm13	CD4-positive, alpha-beta T cell_Development
Liver	NK cell	Ageing	-0.479009	perm13	NK cell_Ageing
Liver	NK cell	Development	-0.684712	perm13	NK cell_Development
Liver	neutrophil	Ageing	0.857173	perm13	neutrophil_Ageing
Liver	neutrophil	Development	-0.558581	perm13	neutrophil_Development
Liver	hepatocyte	Ageing	-0.756329	perm13	hepatocyte_Ageing
Liver	hepatocyte	Development	0.954994	perm13	hepatocyte_Development
Liver	endothelial cell of hepatic sinusoid	Ageing	-0.831962	perm13	endothelial cell of hepatic sinusoid_Ageing
Liver	endothelial cell of hepatic sinusoid	Development	0.396412	perm13	endothelial cell of hepatic sinusoid_Development
Liver	Kupffer cell	Ageing	0.638678	perm13	Kupffer cell_Ageing
Liver	Kupffer cell	Development	-0.882919	perm13	Kupffer cell_Development
Liver	myeloid leukocyte	Ageing	-0.168073	perm13	myeloid leukocyte_Ageing
Liver	myeloid leukocyte	Development	-0.882919	perm13	myeloid leukocyte_Development
Liver	mature NK T cell	Ageing	0	perm14	mature NK T cell_Ageing
Liver	mature NK T cell	Development	-0.522544	perm14	mature NK T cell_Development
Liver	T cell	Ageing	0.672293	perm14	T cell_Ageing
Liver	T cell	Development	-0.991031	perm14	T cell_Development
Liver	B cell	Ageing	0.890788	perm14	B cell_Ageing
Liver	B cell	Development	-0.954994	perm14	B cell_Development
Liver	CD4-positive, alpha-beta T cell	Ageing	-0.848769	perm14	CD4-positive, alpha-beta T cell_Ageing
Liver	CD4-positive, alpha-beta T cell	Development	-0.486506	perm14	CD4-positive, alpha-beta T cell_Development
Liver	NK cell	Ageing	-0.168073	perm14	NK cell_Ageing
Liver	NK cell	Development	-0.558581	perm14	NK cell_Development
Liver	neutrophil	Ageing	0.815155	perm14	neutrophil_Ageing
Liver	neutrophil	Development	-0.846881	perm14	neutrophil_Development
Liver	hepatocyte	Ageing	-0.714311	perm14	hepatocyte_Ageing
Liver	hepatocyte	Development	0.954994	perm14	hepatocyte_Development
Liver	endothelial cell of hepatic sinusoid	Ageing	-0.857173	perm14	endothelial cell of hepatic sinusoid_Ageing
Liver	endothelial cell of hepatic sinusoid	Development	0.558581	perm14	endothelial cell of hepatic sinusoid_Development
Liver	Kupffer cell	Ageing	0.647082	perm14	Kupffer cell_Ageing
Liver	Kupffer cell	Development	-0.846881	perm14	Kupffer cell_Development
Liver	myeloid leukocyte	Ageing	-0.0336146	perm14	myeloid leukocyte_Ageing
Liver	myeloid leukocyte	Development	-0.846881	perm14	myeloid leukocyte_Development
Liver	mature NK T cell	Ageing	-0.0756329	perm15	mature NK T cell_Ageing
Liver	mature NK T cell	Development	-0.684712	perm15	mature NK T cell_Development
Liver	T cell	Ageing	0.747926	perm15	T cell_Ageing
Liver	T cell	Development	-0.991031	perm15	T cell_Development
Liver	B cell	Ageing	0.756329	perm15	B cell_Ageing
Liver	B cell	Development	-0.954994	perm15	B cell_Development
Liver	CD4-positive, alpha-beta T cell	Ageing	-0.521027	perm15	CD4-positive, alpha-beta T cell_Ageing
Liver	CD4-positive, alpha-beta T cell	Development	-0.810844	perm15	CD4-positive, alpha-beta T cell_Development
Liver	NK cell	Ageing	-0.59666	perm15	NK cell_Ageing
Liver	NK cell	Development	0.126131	perm15	NK cell_Development
Liver	neutrophil	Ageing	0.697504	perm15	neutrophil_Ageing
Liver	neutrophil	Development	-0.666694	perm15	neutrophil_Development
Liver	hepatocyte	Ageing	-0.773137	perm15	hepatocyte_Ageing
Liver	hepatocyte	Development	0.954994	perm15	hepatocyte_Development
Liver	endothelial cell of hepatic sinusoid	Ageing	-0.798348	perm15	endothelial cell of hepatic sinusoid_Ageing
Liver	endothelial cell of hepatic sinusoid	Development	0.666694	perm15	endothelial cell of hepatic sinusoid_Development
Liver	Kupffer cell	Ageing	0.638678	perm15	Kupffer cell_Ageing
Liver	Kupffer cell	Development	-0.846881	perm15	Kupffer cell_Development
Liver	myeloid leukocyte	Ageing	0.25211	perm15	myeloid leukocyte_Ageing
Liver	myeloid leukocyte	Development	-0.666694	perm15	myeloid leukocyte_Development
Liver	mature NK T cell	Ageing	-0.0588256	perm16	mature NK T cell_Ageing
Liver	mature NK T cell	Development	-0.666694	perm16	mature NK T cell_Development
Liver	T cell	Ageing	0.487412	perm16	T cell_Ageing
Liver	T cell	Development	-0.991031	perm16	T cell_Development
Liver	B cell	Ageing	0.537834	perm16	B cell_Ageing
Liver	B cell	Development	-0.954994	perm16	B cell_Development
Liver	CD4-positive, alpha-beta T cell	Ageing	-0.0924402	perm16	CD4-positive, alpha-beta T cell_Ageing
Liver	CD4-positive, alpha-beta T cell	Development	-0.774806	perm16	CD4-positive, alpha-beta T cell_Development
Liver	NK cell	Ageing	-0.0420183	perm16	NK cell_Ageing
Liver	NK cell	Development	-0.738769	perm16	NK cell_Development
Liver	neutrophil	Ageing	0.613467	perm16	neutrophil_Ageing
Liver	neutrophil	Development	-0.630656	perm16	neutrophil_Development
Liver	hepatocyte	Ageing	-0.773137	perm16	hepatocyte_Ageing
Liver	hepatocyte	Development	0.954994	perm16	hepatocyte_Development
Liver	endothelial cell of hepatic sinusoid	Ageing	-0.714311	perm16	endothelial cell of hepatic sinusoid_Ageing
Liver	endothelial cell of hepatic sinusoid	Development	0.396412	perm16	endothelial cell of hepatic sinusoid_Development
Liver	Kupffer cell	Ageing	0.638678	perm16	Kupffer cell_Ageing
Liver	Kupffer cell	Development	-0.882919	perm16	Kupffer cell_Development
Liver	myeloid leukocyte	Ageing	0.100844	perm16	myeloid leukocyte_Ageing
Liver	myeloid leukocyte	Development	-0.846881	perm16	myeloid leukocyte_Development
Liver	mature NK T cell	Ageing	-0.268917	perm17	mature NK T cell_Ageing
Liver	mature NK T cell	Development	-0.630656	perm17	mature NK T cell_Development
Liver	T cell	Ageing	0.6891	perm17	T cell_Ageing
Liver	T cell	Development	-0.991031	perm17	T cell_Development
Liver	B cell	Ageing	0.554641	perm17	B cell_Ageing
Liver	B cell	Development	-0.846881	perm17	B cell_Development
Liver	CD4-positive, alpha-beta T cell	Ageing	-0.756329	perm17	CD4-positive, alpha-beta T cell_Ageing
Liver	CD4-positive, alpha-beta T cell	Development	-0.738769	perm17	CD4-positive, alpha-beta T cell_Development
Liver	NK cell	Ageing	-0.15967	perm17	NK cell_Ageing
Liver	NK cell	Development	-0.810844	perm17	NK cell_Development
Liver	neutrophil	Ageing	0.697504	perm17	neutrophil_Ageing
Liver	neutrophil	Development	-0.666694	perm17	neutrophil_Development
Liver	hepatocyte	Ageing	-0.739522	perm17	hepatocyte_Ageing
Liver	hepatocyte	Development	0.954994	perm17	hepatocyte_Development
Liver	endothelial cell of hepatic sinusoid	Ageing	-0.87398	perm17	endothelial cell of hepatic sinusoid_Ageing
Liver	endothelial cell of hepatic sinusoid	Development	0.666694	perm17	endothelial cell of hepatic sinusoid_Development
Liver	Kupffer cell	Ageing	0.638678	perm17	Kupffer cell_Ageing
Liver	Kupffer cell	Development	-0.882919	perm17	Kupffer cell_Development
Liver	myeloid leukocyte	Ageing	-0.386568	perm17	myeloid leukocyte_Ageing
Liver	myeloid leukocyte	Development	-0.846881	perm17	myeloid leukocyte_Development
Liver	mature NK T cell	Ageing	-0.546238	perm18	mature NK T cell_Ageing
Liver	mature NK T cell	Development	-0.558581	perm18	mature NK T cell_Development
Liver	T cell	Ageing	0.672293	perm18	T cell_Ageing
Liver	T cell	Development	-0.991031	perm18	T cell_Development
Liver	B cell	Ageing	0.773137	perm18	B cell_Ageing
Liver	B cell	Development	-0.954994	perm18	B cell_Development
Liver	CD4-positive, alpha-beta T cell	Ageing	0.235302	perm18	CD4-positive, alpha-beta T cell_Ageing
Liver	CD4-positive, alpha-beta T cell	Development	-0.810844	perm18	CD4-positive, alpha-beta T cell_Development
Liver	NK cell	Ageing	0.647082	perm18	NK cell_Ageing
Liver	NK cell	Development	-0.522544	perm18	NK cell_Development
Liver	neutrophil	Ageing	0.579852	perm18	neutrophil_Ageing
Liver	neutrophil	Development	-0.792825	perm18	neutrophil_Development
Liver	hepatocyte	Ageing	-0.739522	perm18	hepatocyte_Ageing
Liver	hepatocyte	Development	0.954994	perm18	hepatocyte_Development
Liver	endothelial cell of hepatic sinusoid	Ageing	-0.831962	perm18	endothelial cell of hepatic sinusoid_Ageing
Liver	endothelial cell of hepatic sinusoid	Development	0.558581	perm18	endothelial cell of hepatic sinusoid_Development
Liver	Kupffer cell	Ageing	0.621871	perm18	Kupffer cell_Ageing
Liver	Kupffer cell	Development	-0.882919	perm18	Kupffer cell_Development
Liver	myeloid leukocyte	Ageing	-0.504219	perm18	myeloid leukocyte_Ageing
Liver	myeloid leukocyte	Development	-0.666694	perm18	myeloid leukocyte_Development
Liver	mature NK T cell	Ageing	-0.235302	perm19	mature NK T cell_Ageing
Liver	mature NK T cell	Development	-0.630656	perm19	mature NK T cell_Development
Liver	T cell	Ageing	0.731118	perm19	T cell_Ageing
Liver	T cell	Development	-0.991031	perm19	T cell_Development
Liver	B cell	Ageing	0.453798	perm19	B cell_Ageing
Liver	B cell	Development	-0.882919	perm19	B cell_Development
Liver	CD4-positive, alpha-beta T cell	Ageing	-0.411779	perm19	CD4-positive, alpha-beta T cell_Ageing
Liver	CD4-positive, alpha-beta T cell	Development	-0.378394	perm19	CD4-positive, alpha-beta T cell_Development
Liver	NK cell	Ageing	0.168073	perm19	NK cell_Ageing
Liver	NK cell	Development	-0.954994	perm19	NK cell_Development
Liver	neutrophil	Ageing	0.764733	perm19	neutrophil_Ageing
Liver	neutrophil	Development	-0.846881	perm19	neutrophil_Development
Liver	hepatocyte	Ageing	-0.747926	perm19	hepatocyte_Ageing
Liver	hepatocyte	Development	0.882919	perm19	hepatocyte_Development
Liver	endothelial cell of hepatic sinusoid	Ageing	-0.714311	perm19	endothelial cell of hepatic sinusoid_Ageing
Liver	endothelial cell of hepatic sinusoid	Development	0.630656	perm19	endothelial cell of hepatic sinusoid_Development
Liver	Kupffer cell	Ageing	0.638678	perm19	Kupffer cell_Ageing
Liver	Kupffer cell	Development	-0.846881	perm19	Kupffer cell_Development
Liver	myeloid leukocyte	Ageing	-0.285724	perm19	myeloid leukocyte_Ageing
Liver	myeloid leukocyte	Development	-0.882919	perm19	myeloid leukocyte_Development
Liver	mature NK T cell	Ageing	-0.210091	perm20	mature NK T cell_Ageing
Liver	mature NK T cell	Development	-0.774806	perm20	mature NK T cell_Development
Liver	T cell	Ageing	0.722715	perm20	T cell_Ageing
Liver	T cell	Development	-0.991031	perm20	T cell_Development
Liver	B cell	Ageing	0.613467	perm20	B cell_Ageing
Liver	B cell	Development	-0.918956	perm20	B cell_Development
Liver	CD4-positive, alpha-beta T cell	Ageing	-0.243706	perm20	CD4-positive, alpha-beta T cell_Ageing
Liver	CD4-positive, alpha-beta T cell	Development	-0.378394	perm20	CD4-positive, alpha-beta T cell_Development
Liver	NK cell	Ageing	-0.15967	perm20	NK cell_Ageing
Liver	NK cell	Development	-0.630656	perm20	NK cell_Development
Liver	neutrophil	Ageing	0.563045	perm20	neutrophil_Ageing
Liver	neutrophil	Development	-0.738769	perm20	neutrophil_Development
Liver	hepatocyte	Ageing	-0.806751	perm20	hepatocyte_Ageing
Liver	hepatocyte	Development	0.882919	perm20	hepatocyte_Development
Liver	endothelial cell of hepatic sinusoid	Ageing	-0.831962	perm20	endothelial cell of hepatic sinusoid_Ageing
Liver	endothelial cell of hepatic sinusoid	Development	0.558581	perm20	endothelial cell of hepatic sinusoid_Development
Liver	Kupffer cell	Ageing	0.621871	perm20	Kupffer cell_Ageing
Liver	Kupffer cell	Development	-0.846881	perm20	Kupffer cell_Development
Liver	myeloid leukocyte	Ageing	0.235302	perm20	myeloid leukocyte_Ageing
Liver	myeloid leukocyte	Development	-0.666694	perm20	myeloid leukocyte_Development
Liver	mature NK T cell	Ageing	0.0840366	perm21	mature NK T cell_Ageing
Liver	mature NK T cell	Development	-0.630656	perm21	mature NK T cell_Development
Liver	T cell	Ageing	0.655485	perm21	T cell_Ageing
Liver	T cell	Development	-0.991031	perm21	T cell_Development
Liver	B cell	Ageing	0.621871	perm21	B cell_Ageing
Liver	B cell	Development	-0.882919	perm21	B cell_Development
Liver	CD4-positive, alpha-beta T cell	Ageing	-0.655485	perm21	CD4-positive, alpha-beta T cell_Ageing
Liver	CD4-positive, alpha-beta T cell	Development	-0.738769	perm21	CD4-positive, alpha-beta T cell_Development
Liver	NK cell	Ageing	0.361357	perm21	NK cell_Ageing
Liver	NK cell	Development	-0.991031	perm21	NK cell_Development
Liver	neutrophil	Ageing	0.705907	perm21	neutrophil_Ageing
Liver	neutrophil	Development	-0.666694	perm21	neutrophil_Development
Liver	hepatocyte	Ageing	-0.773137	perm21	hepatocyte_Ageing
Liver	hepatocyte	Development	0.954994	perm21	hepatocyte_Development
Liver	endothelial cell of hepatic sinusoid	Ageing	-0.831962	perm21	endothelial cell of hepatic sinusoid_Ageing
Liver	endothelial cell of hepatic sinusoid	Development	0.558581	perm21	endothelial cell of hepatic sinusoid_Development
Liver	Kupffer cell	Ageing	0.647082	perm21	Kupffer cell_Ageing
Liver	Kupffer cell	Development	-0.846881	perm21	Kupffer cell_Development
Liver	myeloid leukocyte	Ageing	0.218495	perm21	myeloid leukocyte_Ageing
Liver	myeloid leukocyte	Development	-0.846881	perm21	myeloid leukocyte_Development
Liver	mature NK T cell	Ageing	0.319339	perm22	mature NK T cell_Ageing
Liver	mature NK T cell	Development	-0.774806	perm22	mature NK T cell_Development
Liver	T cell	Ageing	0.739522	perm22	T cell_Ageing
Liver	T cell	Development	-0.991031	perm22	T cell_Development
Liver	B cell	Ageing	0.78154	perm22	B cell_Ageing
Liver	B cell	Development	-0.882919	perm22	B cell_Development
Liver	CD4-positive, alpha-beta T cell	Ageing	-0.647082	perm22	CD4-positive, alpha-beta T cell_Ageing
Liver	CD4-positive, alpha-beta T cell	Development	-0.378394	perm22	CD4-positive, alpha-beta T cell_Development
Liver	NK cell	Ageing	0.714311	perm22	NK cell_Ageing
Liver	NK cell	Development	-0.918956	perm22	NK cell_Development
Liver	neutrophil	Ageing	0.831962	perm22	neutrophil_Ageing
Liver	neutrophil	Development	-0.792825	perm22	neutrophil_Development
Liver	hepatocyte	Ageing	-0.773137	perm22	hepatocyte_Ageing
Liver	hepatocyte	Development	0.954994	perm22	hepatocyte_Development
Liver	endothelial cell of hepatic sinusoid	Ageing	-0.857173	perm22	endothelial cell of hepatic sinusoid_Ageing
Liver	endothelial cell of hepatic sinusoid	Development	0.558581	perm22	endothelial cell of hepatic sinusoid_Development
Liver	Kupffer cell	Ageing	0.638678	perm22	Kupffer cell_Ageing
Liver	Kupffer cell	Development	-0.882919	perm22	Kupffer cell_Development
Liver	myeloid leukocyte	Ageing	0.0924402	perm22	myeloid leukocyte_Ageing
Liver	myeloid leukocyte	Development	-0.666694	perm22	myeloid leukocyte_Development
Liver	mature NK T cell	Ageing	0.336146	perm23	mature NK T cell_Ageing
Liver	mature NK T cell	Development	-0.810844	perm23	mature NK T cell_Development
Liver	T cell	Ageing	0.285724	perm23	T cell_Ageing
Liver	T cell	Development	-0.991031	perm23	T cell_Development
Liver	B cell	Ageing	0.655485	perm23	B cell_Ageing
Liver	B cell	Development	-0.954994	perm23	B cell_Development
Liver	CD4-positive, alpha-beta T cell	Ageing	-0.176477	perm23	CD4-positive, alpha-beta T cell_Ageing
Liver	CD4-positive, alpha-beta T cell	Development	-0.702731	perm23	CD4-positive, alpha-beta T cell_Development
Liver	NK cell	Ageing	-0.00840366	perm23	NK cell_Ageing
Liver	NK cell	Development	-0.216225	perm23	NK cell_Development
Liver	neutrophil	Ageing	0.831962	perm23	neutrophil_Ageing
Liver	neutrophil	Development	-0.846881	perm23	neutrophil_Development
Liver	hepatocyte	Ageing	-0.59666	perm23	hepatocyte_Ageing
Liver	hepatocyte	Development	0.954994	perm23	hepatocyte_Development
Liver	endothelial cell of hepatic sinusoid	Ageing	-0.831962	perm23	endothelial cell of hepatic sinusoid_Ageing
Liver	endothelial cell of hepatic sinusoid	Development	0.396412	perm23	endothelial cell of hepatic sinusoid_Development
Liver	Kupffer cell	Ageing	0.647082	perm23	Kupffer cell_Ageing
Liver	Kupffer cell	Development	-0.846881	perm23	Kupffer cell_Development
Liver	myeloid leukocyte	Ageing	-0.0420183	perm23	myeloid leukocyte_Ageing
Liver	myeloid leukocyte	Development	-0.846881	perm23	myeloid leukocyte_Development
Liver	mature NK T cell	Ageing	0.52943	perm24	mature NK T cell_Ageing
Liver	mature NK T cell	Development	-0.882919	perm24	mature NK T cell_Development
Liver	T cell	Ageing	0.840366	perm24	T cell_Ageing
Liver	T cell	Development	-0.991031	perm24	T cell_Development
Liver	B cell	Ageing	0.142862	perm24	B cell_Ageing
Liver	B cell	Development	-0.882919	perm24	B cell_Development
Liver	CD4-positive, alpha-beta T cell	Ageing	-0.663889	perm24	CD4-positive, alpha-beta T cell_Ageing
Liver	CD4-positive, alpha-beta T cell	Development	-0.450469	perm24	CD4-positive, alpha-beta T cell_Development
Liver	NK cell	Ageing	0.218495	perm24	NK cell_Ageing
Liver	NK cell	Development	-0.738769	perm24	NK cell_Development
Liver	neutrophil	Ageing	0.731118	perm24	neutrophil_Ageing
Liver	neutrophil	Development	-0.738769	perm24	neutrophil_Development
Liver	hepatocyte	Ageing	-0.773137	perm24	hepatocyte_Ageing
Liver	hepatocyte	Development	0.954994	perm24	hepatocyte_Development
Liver	endothelial cell of hepatic sinusoid	Ageing	-0.798348	perm24	endothelial cell of hepatic sinusoid_Ageing
Liver	endothelial cell of hepatic sinusoid	Development	0.738769	perm24	endothelial cell of hepatic sinusoid_Development
Liver	Kupffer cell	Ageing	0.621871	perm24	Kupffer cell_Ageing
Liver	Kupffer cell	Development	-0.882919	perm24	Kupffer cell_Development
Liver	myeloid leukocyte	Ageing	0.445394	perm24	myeloid leukocyte_Ageing
Liver	myeloid leukocyte	Development	-0.882919	perm24	myeloid leukocyte_Development
Liver	mature NK T cell	Ageing	0.319339	perm25	mature NK T cell_Ageing
Liver	mature NK T cell	Development	-0.0900937	perm25	mature NK T cell_Development
Liver	T cell	Ageing	0.630274	perm25	T cell_Ageing
Liver	T cell	Development	-0.991031	perm25	T cell_Development
Liver	B cell	Ageing	0.756329	perm25	B cell_Ageing
Liver	B cell	Development	-0.991031	perm25	B cell_Development
Liver	CD4-positive, alpha-beta T cell	Ageing	-0.43699	perm25	CD4-positive, alpha-beta T cell_Ageing
Liver	CD4-positive, alpha-beta T cell	Development	-0.991031	perm25	CD4-positive, alpha-beta T cell_Development
Liver	NK cell	Ageing	0.336146	perm25	NK cell_Ageing
Liver	NK cell	Development	-0.918956	perm25	NK cell_Development
Liver	neutrophil	Ageing	0.731118	perm25	neutrophil_Ageing
Liver	neutrophil	Development	-0.738769	perm25	neutrophil_Development
Liver	hepatocyte	Ageing	-0.764733	perm25	hepatocyte_Ageing
Liver	hepatocyte	Development	0.954994	perm25	hepatocyte_Development
Liver	endothelial cell of hepatic sinusoid	Ageing	-0.798348	perm25	endothelial cell of hepatic sinusoid_Ageing
Liver	endothelial cell of hepatic sinusoid	Development	0.558581	perm25	endothelial cell of hepatic sinusoid_Development
Liver	Kupffer cell	Ageing	0.638678	perm25	Kupffer cell_Ageing
Liver	Kupffer cell	Development	-0.810844	perm25	Kupffer cell_Development
Liver	myeloid leukocyte	Ageing	0.193284	perm25	myeloid leukocyte_Ageing
Liver	myeloid leukocyte	Development	-0.846881	perm25	myeloid leukocyte_Development
Liver	mature NK T cell	Ageing	0.268917	perm26	mature NK T cell_Ageing
Liver	mature NK T cell	Development	-0.774806	perm26	mature NK T cell_Development
Liver	T cell	Ageing	0.714311	perm26	T cell_Ageing
Liver	T cell	Development	-0.991031	perm26	T cell_Development
Liver	B cell	Ageing	0.739522	perm26	B cell_Ageing
Liver	B cell	Development	-0.954994	perm26	B cell_Development
Liver	CD4-positive, alpha-beta T cell	Ageing	-0.59666	perm26	CD4-positive, alpha-beta T cell_Ageing
Liver	CD4-positive, alpha-beta T cell	Development	-0.486506	perm26	CD4-positive, alpha-beta T cell_Development
Liver	NK cell	Ageing	0.378165	perm26	NK cell_Ageing
Liver	NK cell	Development	-0.072075	perm26	NK cell_Development
Liver	neutrophil	Ageing	0.714311	perm26	neutrophil_Ageing
Liver	neutrophil	Development	-0.792825	perm26	neutrophil_Development
Liver	hepatocyte	Ageing	-0.714311	perm26	hepatocyte_Ageing
Liver	hepatocyte	Development	0.954994	perm26	hepatocyte_Development
Liver	endothelial cell of hepatic sinusoid	Ageing	-0.899191	perm26	endothelial cell of hepatic sinusoid_Ageing
Liver	endothelial cell of hepatic sinusoid	Development	0.630656	perm26	endothelial cell of hepatic sinusoid_Development
Liver	Kupffer cell	Ageing	0.621871	perm26	Kupffer cell_Ageing
Liver	Kupffer cell	Development	-0.846881	perm26	Kupffer cell_Development
Liver	myeloid leukocyte	Ageing	-0.403376	perm26	myeloid leukocyte_Ageing
Liver	myeloid leukocyte	Development	-0.666694	perm26	myeloid leukocyte_Development
Liver	mature NK T cell	Ageing	-0.554641	perm27	mature NK T cell_Ageing
Liver	mature NK T cell	Development	-0.666694	perm27	mature NK T cell_Development
Liver	T cell	Ageing	0.630274	perm27	T cell_Ageing
Liver	T cell	Development	-0.991031	perm27	T cell_Development
Liver	B cell	Ageing	0.680696	perm27	B cell_Ageing
Liver	B cell	Development	-0.882919	perm27	B cell_Development
Liver	CD4-positive, alpha-beta T cell	Ageing	-0.705907	perm27	CD4-positive, alpha-beta T cell_Ageing
Liver	CD4-positive, alpha-beta T cell	Development	-0.738769	perm27	CD4-positive, alpha-beta T cell_Development
Liver	NK cell	Ageing	0.621871	perm27	NK cell_Ageing
Liver	NK cell	Development	-0.738769	perm27	NK cell_Development
Liver	neutrophil	Ageing	0.78154	perm27	neutrophil_Ageing
Liver	neutrophil	Development	-0.846881	perm27	neutrophil_Development
Liver	hepatocyte	Ageing	-0.722715	perm27	hepatocyte_Ageing
Liver	hepatocyte	Development	0.991031	perm27	hepatocyte_Development
Liver	endothelial cell of hepatic sinusoid	Ageing	-0.857173	perm27	endothelial cell of hepatic sinusoid_Ageing
Liver	endothelial cell of hepatic sinusoid	Development	0.558581	perm27	endothelial cell of hepatic sinusoid_Development
Liver	Kupffer cell	Ageing	0.621871	perm27	Kupffer cell_Ageing
Liver	Kupffer cell	Development	-0.846881	perm27	Kupffer cell_Development
Liver	myeloid leukocyte	Ageing	0.025211	perm27	myeloid leukocyte_Ageing
Liver	myeloid leukocyte	Development	-0.882919	perm27	myeloid leukocyte_Development
Liver	mature NK T cell	Ageing	0.00840366	perm28	mature NK T cell_Ageing
Liver	mature NK T cell	Development	-0.738769	perm28	mature NK T cell_Development
Liver	T cell	Ageing	0.798348	perm28	T cell_Ageing
Liver	T cell	Development	-0.991031	perm28	T cell_Development
Liver	B cell	Ageing	0.479009	perm28	B cell_Ageing
Liver	B cell	Development	-0.810844	perm28	B cell_Development
Liver	CD4-positive, alpha-beta T cell	Ageing	-0.697504	perm28	CD4-positive, alpha-beta T cell_Ageing
Liver	CD4-positive, alpha-beta T cell	Development	-0.810844	perm28	CD4-positive, alpha-beta T cell_Development
Liver	NK cell	Ageing	0.201688	perm28	NK cell_Ageing
Liver	NK cell	Development	-0.738769	perm28	NK cell_Development
Liver	neutrophil	Ageing	0.59666	perm28	neutrophil_Ageing
Liver	neutrophil	Development	-0.738769	perm28	neutrophil_Development
Liver	hepatocyte	Ageing	-0.722715	perm28	hepatocyte_Ageing
Liver	hepatocyte	Development	0.954994	perm28	hepatocyte_Development
Liver	endothelial cell of hepatic sinusoid	Ageing	-0.831962	perm28	endothelial cell of hepatic sinusoid_Ageing
Liver	endothelial cell of hepatic sinusoid	Development	0.558581	perm28	endothelial cell of hepatic sinusoid_Development
Liver	Kupffer cell	Ageing	0.621871	perm28	Kupffer cell_Ageing
Liver	Kupffer cell	Development	-0.810844	perm28	Kupffer cell_Development
Liver	myeloid leukocyte	Ageing	0.336146	perm28	myeloid leukocyte_Ageing
Liver	myeloid leukocyte	Development	-0.991031	perm28	myeloid leukocyte_Development
Liver	mature NK T cell	Ageing	0.285724	perm29	mature NK T cell_Ageing
Liver	mature NK T cell	Development	-0.630656	perm29	mature NK T cell_Development
Liver	T cell	Ageing	0.134459	perm29	T cell_Ageing
Liver	T cell	Development	-0.991031	perm29	T cell_Development
Liver	B cell	Ageing	0.890788	perm29	B cell_Ageing
Liver	B cell	Development	-0.991031	perm29	B cell_Development
Liver	CD4-positive, alpha-beta T cell	Ageing	-0.495816	perm29	CD4-positive, alpha-beta T cell_Ageing
Liver	CD4-positive, alpha-beta T cell	Development	-0.666694	perm29	CD4-positive, alpha-beta T cell_Development
Liver	NK cell	Ageing	0.201688	perm29	NK cell_Ageing
Liver	NK cell	Development	-0.774806	perm29	NK cell_Development
Liver	neutrophil	Ageing	0.731118	perm29	neutrophil_Ageing
Liver	neutrophil	Development	-0.738769	perm29	neutrophil_Development
Liver	hepatocyte	Ageing	-0.773137	perm29	hepatocyte_Ageing
Liver	hepatocyte	Development	0.954994	perm29	hepatocyte_Development
Liver	endothelial cell of hepatic sinusoid	Ageing	-0.899191	perm29	endothelial cell of hepatic sinusoid_Ageing
Liver	endothelial cell of hepatic sinusoid	Development	0.396412	perm29	endothelial cell of hepatic sinusoid_Development
Liver	Kupffer cell	Ageing	0.647082	perm29	Kupffer cell_Ageing
Liver	Kupffer cell	Development	-0.882919	perm29	Kupffer cell_Development
Liver	myeloid leukocyte	Ageing	-0.0504219	perm29	myeloid leukocyte_Ageing
Liver	myeloid leukocyte	Development	-0.738769	perm29	myeloid leukocyte_Development
Liver	mature NK T cell	Ageing	0.361357	perm30	mature NK T cell_Ageing
Liver	mature NK T cell	Development	0.342356	perm30	mature NK T cell_Development
Liver	T cell	Ageing	0.823558	perm30	T cell_Ageing
Liver	T cell	Development	-0.991031	perm30	T cell_Development
Liver	B cell	Ageing	0.773137	perm30	B cell_Ageing
Liver	B cell	Development	-0.954994	perm30	B cell_Development
Liver	CD4-positive, alpha-beta T cell	Ageing	-0.428587	perm30	CD4-positive, alpha-beta T cell_Ageing
Liver	CD4-positive, alpha-beta T cell	Development	-0.774806	perm30	CD4-positive, alpha-beta T cell_Development
Liver	NK cell	Ageing	-0.151266	perm30	NK cell_Ageing
Liver	NK cell	Development	-0.0360375	perm30	NK cell_Development
Liver	neutrophil	Ageing	0.764733	perm30	neutrophil_Ageing
Liver	neutrophil	Development	-0.684712	perm30	neutrophil_Development
Liver	hepatocyte	Ageing	-0.764733	perm30	hepatocyte_Ageing
Liver	hepatocyte	Development	0.954994	perm30	hepatocyte_Development
Liver	endothelial cell of hepatic sinusoid	Ageing	-0.831962	perm30	endothelial cell of hepatic sinusoid_Ageing
Liver	endothelial cell of hepatic sinusoid	Development	0.558581	perm30	endothelial cell of hepatic sinusoid_Development
Liver	Kupffer cell	Ageing	0.638678	perm30	Kupffer cell_Ageing
Liver	Kupffer cell	Development	-0.882919	perm30	Kupffer cell_Development
Liver	myeloid leukocyte	Ageing	-0.193284	perm30	myeloid leukocyte_Ageing
Liver	myeloid leukocyte	Development	-0.846881	perm30	myeloid leukocyte_Development
Liver	mature NK T cell	Ageing	-0.025211	perm31	mature NK T cell_Ageing
Liver	mature NK T cell	Development	-0.414431	perm31	mature NK T cell_Development
Liver	T cell	Ageing	0.722715	perm31	T cell_Ageing
Liver	T cell	Development	-0.991031	perm31	T cell_Development
Liver	B cell	Ageing	0.773137	perm31	B cell_Ageing
Liver	B cell	Development	-0.846881	perm31	B cell_Development
Liver	CD4-positive, alpha-beta T cell	Ageing	-0.890788	perm31	CD4-positive, alpha-beta T cell_Ageing
Liver	CD4-positive, alpha-beta T cell	Development	-0.918956	perm31	CD4-positive, alpha-beta T cell_Development
Liver	NK cell	Ageing	0.722715	perm31	NK cell_Ageing
Liver	NK cell	Development	-0.738769	perm31	NK cell_Development
Liver	neutrophil	Ageing	0.546238	perm31	neutrophil_Ageing
Liver	neutrophil	Development	-0.738769	perm31	neutrophil_Development
Liver	hepatocyte	Ageing	-0.756329	perm31	hepatocyte_Ageing
Liver	hepatocyte	Development	0.954994	perm31	hepatocyte_Development
Liver	endothelial cell of hepatic sinusoid	Ageing	-0.857173	perm31	endothelial cell of hepatic sinusoid_Ageing
Liver	endothelial cell of hepatic sinusoid	Development	0.396412	perm31	endothelial cell of hepatic sinusoid_Development
Liver	Kupffer cell	Ageing	0.638678	perm31	Kupffer cell_Ageing
Liver	Kupffer cell	Development	-0.846881	perm31	Kupffer cell_Development
Liver	myeloid leukocyte	Ageing	-0.210091	perm31	myeloid leukocyte_Ageing
Liver	myeloid leukocyte	Development	-0.666694	perm31	myeloid leukocyte_Development
Liver	mature NK T cell	Ageing	0.117651	perm32	mature NK T cell_Ageing
Liver	mature NK T cell	Development	-0.666694	perm32	mature NK T cell_Development
Liver	T cell	Ageing	0.655485	perm32	T cell_Ageing
Liver	T cell	Development	-0.991031	perm32	T cell_Development
Liver	B cell	Ageing	0.210091	perm32	B cell_Ageing
Liver	B cell	Development	-0.846881	perm32	B cell_Development
Liver	CD4-positive, alpha-beta T cell	Ageing	-0.815155	perm32	CD4-positive, alpha-beta T cell_Ageing
Liver	CD4-positive, alpha-beta T cell	Development	-0.522544	perm32	CD4-positive, alpha-beta T cell_Development
Liver	NK cell	Ageing	-0.235302	perm32	NK cell_Ageing
Liver	NK cell	Development	-0.738769	perm32	NK cell_Development
Liver	neutrophil	Ageing	0.453798	perm32	neutrophil_Ageing
Liver	neutrophil	Development	-0.666694	perm32	neutrophil_Development
Liver	hepatocyte	Ageing	-0.764733	perm32	hepatocyte_Ageing
Liver	hepatocyte	Development	0.954994	perm32	hepatocyte_Development
Liver	endothelial cell of hepatic sinusoid	Ageing	-0.831962	perm32	endothelial cell of hepatic sinusoid_Ageing
Liver	endothelial cell of hepatic sinusoid	Development	0.396412	perm32	endothelial cell of hepatic sinusoid_Development
Liver	Kupffer cell	Ageing	0.647082	perm32	Kupffer cell_Ageing
Liver	Kupffer cell	Development	-0.774806	perm32	Kupffer cell_Development
Liver	myeloid leukocyte	Ageing	0.613467	perm32	myeloid leukocyte_Ageing
Liver	myeloid leukocyte	Development	-0.954994	perm32	myeloid leukocyte_Development
Liver	mature NK T cell	Ageing	0.714311	perm33	mature NK T cell_Ageing
Liver	mature NK T cell	Development	0.180187	perm33	mature NK T cell_Development
Liver	T cell	Ageing	0.924402	perm33	T cell_Ageing
Liver	T cell	Development	-0.991031	perm33	T cell_Development
Liver	B cell	Ageing	0.218495	perm33	B cell_Ageing
Liver	B cell	Development	-0.846881	perm33	B cell_Development
Liver	CD4-positive, alpha-beta T cell	Ageing	-0.605063	perm33	CD4-positive, alpha-beta T cell_Ageing
Liver	CD4-positive, alpha-beta T cell	Development	-0.882919	perm33	CD4-positive, alpha-beta T cell_Development
Liver	NK cell	Ageing	0.621871	perm33	NK cell_Ageing
Liver	NK cell	Development	-0.684712	perm33	NK cell_Development
Liver	neutrophil	Ageing	0.798348	perm33	neutrophil_Ageing
Liver	neutrophil	Development	-0.558581	perm33	neutrophil_Development
Liver	hepatocyte	Ageing	-0.773137	perm33	hepatocyte_Ageing
Liver	hepatocyte	Development	0.954994	perm33	hepatocyte_Development
Liver	endothelial cell of hepatic sinusoid	Ageing	-0.857173	perm33	endothelial cell of hepatic sinusoid_Ageing
Liver	endothelial cell of hepatic sinusoid	Development	0.396412	perm33	endothelial cell of hepatic sinusoid_Development
Liver	Kupffer cell	Ageing	0.638678	perm33	Kupffer cell_Ageing
Liver	Kupffer cell	Development	-0.882919	perm33	Kupffer cell_Development
Liver	myeloid leukocyte	Ageing	-0.260513	perm33	myeloid leukocyte_Ageing
Liver	myeloid leukocyte	Development	-0.846881	perm33	myeloid leukocyte_Development
Liver	mature NK T cell	Ageing	0.495816	perm34	mature NK T cell_Ageing
Liver	mature NK T cell	Development	-0.72075	perm34	mature NK T cell_Development
Liver	T cell	Ageing	0.815155	perm34	T cell_Ageing
Liver	T cell	Development	-0.991031	perm34	T cell_Development
Liver	B cell	Ageing	0.445394	perm34	B cell_Ageing
Liver	B cell	Development	-0.846881	perm34	B cell_Development
Liver	CD4-positive, alpha-beta T cell	Ageing	-0.479009	perm34	CD4-positive, alpha-beta T cell_Ageing
Liver	CD4-positive, alpha-beta T cell	Development	-0.954994	perm34	CD4-positive, alpha-beta T cell_Development
Liver	NK cell	Ageing	0.0420183	perm34	NK cell_Ageing
Liver	NK cell	Development	-0.414431	perm34	NK cell_Development
Liver	neutrophil	Ageing	0.705907	perm34	neutrophil_Ageing
Liver	neutrophil	Development	-0.738769	perm34	neutrophil_Development
Liver	hepatocyte	Ageing	-0.789944	perm34	hepatocyte_Ageing
Liver	hepatocyte	Development	0.954994	perm34	hepatocyte_Development
Liver	endothelial cell of hepatic sinusoid	Ageing	-0.831962	perm34	endothelial cell of hepatic sinusoid_Ageing
Liver	endothelial cell of hepatic sinusoid	Development	0.0900937	perm34	endothelial cell of hepatic sinusoid_Development
Liver	Kupffer cell	Ageing	0.663889	perm34	Kupffer cell_Ageing
Liver	Kupffer cell	Development	-0.810844	perm34	Kupffer cell_Development
Liver	myeloid leukocyte	Ageing	-0.352954	perm34	myeloid leukocyte_Ageing
Liver	myeloid leukocyte	Development	-0.954994	perm34	myeloid leukocyte_Development
Liver	mature NK T cell	Ageing	-0.823558	perm35	mature NK T cell_Ageing
Liver	mature NK T cell	Development	-0.126131	perm35	mature NK T cell_Development
Liver	T cell	Ageing	0.789944	perm35	T cell_Ageing
Liver	T cell	Development	-0.991031	perm35	T cell_Development
Liver	B cell	Ageing	0.655485	perm35	B cell_Ageing
Liver	B cell	Development	-0.882919	perm35	B cell_Development
Liver	CD4-positive, alpha-beta T cell	Ageing	-0.470605	perm35	CD4-positive, alpha-beta T cell_Ageing
Liver	CD4-positive, alpha-beta T cell	Development	-0.954994	perm35	CD4-positive, alpha-beta T cell_Development
Liver	NK cell	Ageing	-0.226899	perm35	NK cell_Ageing
Liver	NK cell	Development	-0.666694	perm35	NK cell_Development
Liver	neutrophil	Ageing	0.815155	perm35	neutrophil_Ageing
Liver	neutrophil	Development	-0.684712	perm35	neutrophil_Development
Liver	hepatocyte	Ageing	-0.747926	perm35	hepatocyte_Ageing
Liver	hepatocyte	Development	0.954994	perm35	hepatocyte_Development
Liver	endothelial cell of hepatic sinusoid	Ageing	-0.840366	perm35	endothelial cell of hepatic sinusoid_Ageing
Liver	endothelial cell of hepatic sinusoid	Development	0.738769	perm35	endothelial cell of hepatic sinusoid_Development
Liver	Kupffer cell	Ageing	0.638678	perm35	Kupffer cell_Ageing
Liver	Kupffer cell	Development	-0.882919	perm35	Kupffer cell_Development
Liver	myeloid leukocyte	Ageing	-0.403376	perm35	myeloid leukocyte_Ageing
Liver	myeloid leukocyte	Development	-0.666694	perm35	myeloid leukocyte_Development
Liver	mature NK T cell	Ageing	0.773137	perm36	mature NK T cell_Ageing
Liver	mature NK T cell	Development	-0.738769	perm36	mature NK T cell_Development
Liver	T cell	Ageing	0.59666	perm36	T cell_Ageing
Liver	T cell	Development	-0.991031	perm36	T cell_Development
Liver	B cell	Ageing	0.773137	perm36	B cell_Ageing
Liver	B cell	Development	-0.954994	perm36	B cell_Development
Liver	CD4-positive, alpha-beta T cell	Ageing	-0.487412	perm36	CD4-positive, alpha-beta T cell_Ageing
Liver	CD4-positive, alpha-beta T cell	Development	-0.954994	perm36	CD4-positive, alpha-beta T cell_Development
Liver	NK cell	Ageing	-0.521027	perm36	NK cell_Ageing
Liver	NK cell	Development	-0.810844	perm36	NK cell_Development
Liver	neutrophil	Ageing	0.764733	perm36	neutrophil_Ageing
Liver	neutrophil	Development	-0.738769	perm36	neutrophil_Development
Liver	hepatocyte	Ageing	-0.739522	perm36	hepatocyte_Ageing
Liver	hepatocyte	Development	0.954994	perm36	hepatocyte_Development
Liver	endothelial cell of hepatic sinusoid	Ageing	-0.831962	perm36	endothelial cell of hepatic sinusoid_Ageing
Liver	endothelial cell of hepatic sinusoid	Development	0.558581	perm36	endothelial cell of hepatic sinusoid_Development
Liver	Kupffer cell	Ageing	0.638678	perm36	Kupffer cell_Ageing
Liver	Kupffer cell	Development	-0.882919	perm36	Kupffer cell_Development
Liver	myeloid leukocyte	Ageing	0.0336146	perm36	myeloid leukocyte_Ageing
Liver	myeloid leukocyte	Development	-0.954994	perm36	myeloid leukocyte_Development
Liver	mature NK T cell	Ageing	0.663889	perm37	mature NK T cell_Ageing
Liver	mature NK T cell	Development	-0.630656	perm37	mature NK T cell_Development
Liver	T cell	Ageing	0.638678	perm37	T cell_Ageing
Liver	T cell	Development	-0.991031	perm37	T cell_Development
Liver	B cell	Ageing	0.87398	perm37	B cell_Ageing
Liver	B cell	Development	-0.991031	perm37	B cell_Development
Liver	CD4-positive, alpha-beta T cell	Ageing	-0.806751	perm37	CD4-positive, alpha-beta T cell_Ageing
Liver	CD4-positive, alpha-beta T cell	Development	-0.991031	perm37	CD4-positive, alpha-beta T cell_Development
Liver	NK cell	Ageing	0.134459	perm37	NK cell_Ageing
Liver	NK cell	Development	-0.396412	perm37	NK cell_Development
Liver	neutrophil	Ageing	0.764733	perm37	neutrophil_Ageing
Liver	neutrophil	Development	-0.738769	perm37	neutrophil_Development
Liver	hepatocyte	Ageing	-0.773137	perm37	hepatocyte_Ageing
Liver	hepatocyte	Development	0.954994	perm37	hepatocyte_Development
Liver	endothelial cell of hepatic sinusoid	Ageing	-0.857173	perm37	endothelial cell of hepatic sinusoid_Ageing
Liver	endothelial cell of hepatic sinusoid	Development	0.558581	perm37	endothelial cell of hepatic sinusoid_Development
Liver	Kupffer cell	Ageing	0.705907	perm37	Kupffer cell_Ageing
Liver	Kupffer cell	Development	-0.882919	perm37	Kupffer cell_Development
Liver	myeloid leukocyte	Ageing	0.193284	perm37	myeloid leukocyte_Ageing
Liver	myeloid leukocyte	Development	-0.882919	perm37	myeloid leukocyte_Development
Liver	mature NK T cell	Ageing	0.479009	perm38	mature NK T cell_Ageing
Liver	mature NK T cell	Development	-0.666694	perm38	mature NK T cell_Development
Liver	T cell	Ageing	-0.0336146	perm38	T cell_Ageing
Liver	T cell	Development	-0.991031	perm38	T cell_Development
Liver	B cell	Ageing	0.789944	perm38	B cell_Ageing
Liver	B cell	Development	-0.846881	perm38	B cell_Development
Liver	CD4-positive, alpha-beta T cell	Ageing	-0.403376	perm38	CD4-positive, alpha-beta T cell_Ageing
Liver	CD4-positive, alpha-beta T cell	Development	-0.630656	perm38	CD4-positive, alpha-beta T cell_Development
Liver	NK cell	Ageing	0.00840366	perm38	NK cell_Ageing
Liver	NK cell	Development	-0.198206	perm38	NK cell_Development
Liver	neutrophil	Ageing	0.714311	perm38	neutrophil_Ageing
Liver	neutrophil	Development	-0.738769	perm38	neutrophil_Development
Liver	hepatocyte	Ageing	-0.747926	perm38	hepatocyte_Ageing
Liver	hepatocyte	Development	0.954994	perm38	hepatocyte_Development
Liver	endothelial cell of hepatic sinusoid	Ageing	-0.857173	perm38	endothelial cell of hepatic sinusoid_Ageing
Liver	endothelial cell of hepatic sinusoid	Development	0.558581	perm38	endothelial cell of hepatic sinusoid_Development
Liver	Kupffer cell	Ageing	0.647082	perm38	Kupffer cell_Ageing
Liver	Kupffer cell	Development	-0.846881	perm38	Kupffer cell_Development
Liver	myeloid leukocyte	Ageing	-0.504219	perm38	myeloid leukocyte_Ageing
Liver	myeloid leukocyte	Development	-0.991031	perm38	myeloid leukocyte_Development
Liver	mature NK T cell	Ageing	0.285724	perm39	mature NK T cell_Ageing
Liver	mature NK T cell	Development	-0.2883	perm39	mature NK T cell_Development
Liver	T cell	Ageing	0.546238	perm39	T cell_Ageing
Liver	T cell	Development	-0.991031	perm39	T cell_Development
Liver	B cell	Ageing	0.310935	perm39	B cell_Ageing
Liver	B cell	Development	-0.882919	perm39	B cell_Development
Liver	CD4-positive, alpha-beta T cell	Ageing	-0.731118	perm39	CD4-positive, alpha-beta T cell_Ageing
Liver	CD4-positive, alpha-beta T cell	Development	-0.378394	perm39	CD4-positive, alpha-beta T cell_Development
Liver	NK cell	Ageing	0.302532	perm39	NK cell_Ageing
Liver	NK cell	Development	-0.991031	perm39	NK cell_Development
Liver	neutrophil	Ageing	0.831962	perm39	neutrophil_Ageing
Liver	neutrophil	Development	-0.738769	perm39	neutrophil_Development
Liver	hepatocyte	Ageing	-0.747926	perm39	hepatocyte_Ageing
Liver	hepatocyte	Development	0.882919	perm39	hepatocyte_Development
Liver	endothelial cell of hepatic sinusoid	Ageing	-0.915999	perm39	endothelial cell of hepatic sinusoid_Ageing
Liver	endothelial cell of hepatic sinusoid	Development	0.666694	perm39	endothelial cell of hepatic sinusoid_Development
Liver	Kupffer cell	Ageing	0.655485	perm39	Kupffer cell_Ageing
Liver	Kupffer cell	Development	-0.846881	perm39	Kupffer cell_Development
Liver	myeloid leukocyte	Ageing	0.352954	perm39	myeloid leukocyte_Ageing
Liver	myeloid leukocyte	Development	-0.630656	perm39	myeloid leukocyte_Development
Liver	mature NK T cell	Ageing	-0.487412	perm40	mature NK T cell_Ageing
Liver	mature NK T cell	Development	-0.666694	perm40	mature NK T cell_Development
Liver	T cell	Ageing	0.479009	perm40	T cell_Ageing
Liver	T cell	Development	-0.991031	perm40	T cell_Development
Liver	B cell	Ageing	0.764733	perm40	B cell_Ageing
[truncated: 19,215 more rows]

## Sheet: sdata7
tissue	cell type	period	Perms	perm	cols
[truncated: 48,000 more rows]

[truncated: 2 more sheets: sdata8, sdata9]
