# Supplementary material for: Inter-tissue convergence of gene expression during ageing suggests age-related loss of tissue and cellular identity
Source: eLife journal article supplement (doi:10.7554/elife.68048), 2022-01-31
Supplement: supp [file elife-68048-supp-v1.zip › elife_poa_e68048_Supplementary_file_1.xlsx]

## Sheet: age_related_change
gene_id

## Sheet: Upgenes.Cortex.development
GO.ID

## Sheet: Upgenes.Cortex.aging
GO.ID

## Sheet: Upgenes.Liver.development
GO.ID

## Sheet: Upgenes.Liver.aging
GO.ID

## Sheet: Upgenes.Lung.development
GO.ID

## Sheet: Upgenes.Lung.aging
GO.ID

## Sheet: Upgenes.Muscle.development
GO.ID

## Sheet: Downgenes.Cortex.development
GO.ID

## Sheet: Downgenes.Cortex.aging
GO.ID

[truncated: 6 more sheets: Downgenes.Liver.development, Downgenes.Liver.aging, Downgenes.Lung.development, Downgenes.Lung.aging, Downgenes.Muscle.development, Downgenes.Muscle.aging]
