# Supplementary material for: Inter-tissue convergence of gene expression during ageing suggests age-related loss of tissue and cellular identity
Source: eLife journal article supplement (doi:10.7554/elife.68048), 2022-01-31
Supplement: supp [file elife-68048-supp-v1.zip › elife_poa_e68048_Supplementary_file_2.xlsx]

## Sheet: Development.Down
GO.ID

## Sheet: Development.Up
GO.ID
