# Supplementary material for: Inter-tissue convergence of gene expression during ageing suggests age-related loss of tissue and cellular identity
Source: eLife journal article supplement (doi:10.7554/elife.68048), 2022-01-31
Supplement: supp [file elife-68048-supp-v1.zip › elife_poa_e68048_Supplementary_file_3.xlsx]

## Sheet: UpDown.Cortex
GO.ID

## Sheet: UpDown.Lung
GO.ID

## Sheet: UpDown.Liver
GO.ID

## Sheet: UpDown.Muscle
GO.ID

## Sheet: DownUp.Cortex
GO.ID

## Sheet: DownUp.Lung
GO.ID

## Sheet: DownUp.Liver
GO.ID

## Sheet: DownUp.Muscle
GO.ID
