# Supplementary material for: Inter-tissue convergence of gene expression during ageing suggests age-related loss of tissue and cellular identity
Source: eLife journal article supplement (doi:10.7554/elife.68048), 2022-01-31
Supplement: supp [file elife-68048-supp-v1.zip › elife_poa_e68048_Supplementary_file_4.xlsx]

## Sheet: info
GORA of DiCo gene clusters determined with CoV values
sheet
cl1-cl7	GORA analysis of cl1-cl7 genes among all remaining DiCo genes	“classicFisher”: p value of the fisher test; “BH”: multiple test corrected p value using FDR

## Sheet: cl1
GO.ID	Term	Annotated	Significant	Expected	classicFisher	BH
GO:0022900	electron transport chain	56	24	6.73	5.4e-09	1.69236e-05
GO:0010257	NADH dehydrogenase complex assembly	37	18	4.45	4.1e-08	4.28313e-05
GO:0032981	mitochondrial respiratory chain complex ...	37	18	4.45	4.1e-08	4.28313e-05
GO:0042775	mitochondrial ATP synthesis coupled elec...	44	19	5.29	1.9e-07	0.00012536
GO:0006119	oxidative phosphorylation	70	25	8.42	2.0e-07	0.00012536
GO:0022904	respiratory electron transport chain	53	21	6.37	2.5e-07	0.000130583
GO:0042773	ATP synthesis coupled electron transport	46	19	5.53	4.4e-07	0.000196994
GO:0033108	mitochondrial respiratory chain complex ...	58	21	6.97	1.5e-06	0.000587625
GO:0046034	ATP metabolic process	132	34	15.87	8.4e-06	0.00292507
GO:0007005	mitochondrion organization	221	48	26.57	2.1e-05	0.0065814
GO:0034622	cellular protein-containing complex asse...	321	62	38.59	6.2e-05	0.0176644
GO:0006091	generation of precursor metabolites and ...	177	38	21.28	0.00020	0.0522333
GO:0060603	mammary gland duct morphogenesis	10	6	1.2	0.00040	0.0964308
GO:0060443	mammary gland morphogenesis	14	7	1.68	0.00056	0.12536
GO:0060977	coronary vasculature morphogenesis	11	6	1.32	0.00080	0.167147
GO:0045333	cellular respiration	91	22	10.94	0.00086	0.168453
GO:0006120	mitochondrial electron transport, NADH t...	16	7	1.92	0.00150	0.276529
GO:0046620	regulation of organ growth	31	10	3.73	0.00244	0.424831
GO:0007507	heart development	190	36	22.84	0.00317	0.45443
GO:0015985	energy coupled proton transport, down el...	18	7	2.16	0.00337	0.45443
GO:0015986	ATP synthesis coupled proton transport	18	7	2.16	0.00337	0.45443
GO:0065003	protein-containing complex assembly	459	74	55.18	0.00365	0.45443
GO:0015980	energy derivation by oxidation of organi...	120	25	14.43	0.00370	0.45443
GO:1904706	negative regulation of vascular associat...	10	5	1.2	0.00370	0.45443
GO:0030150	protein import into mitochondrial matrix	14	6	1.68	0.00377	0.45443
GO:0046621	negative regulation of organ growth	14	6	1.68	0.00377	0.45443
GO:0006754	ATP biosynthetic process	33	10	3.97	0.00408	0.473582
GO:0006325	chromatin organization	167	32	20.08	0.00442	0.494724
GO:0048640	negative regulation of developmental gro...	39	11	4.69	0.00487	0.510842
GO:0045926	negative regulation of growth	73	17	8.78	0.00489	0.510842
GO:0030239	myofibril assembly	24	8	2.89	0.00526	0.531769
GO:0042692	muscle cell differentiation	143	28	17.19	0.00553	0.541594
GO:0051204	protein insertion into mitochondrial mem...	11	5	1.32	0.00612	0.581215
GO:0017038	protein import	75	17	9.02	0.00653	0.593669
GO:0006354	DNA-templated transcription, elongation	20	7	2.4	0.00663	0.593669
GO:0046889	positive regulation of lipid biosyntheti...	25	8	3.01	0.00694	0.604166
GO:0006368	transcription elongation from RNA polyme...	16	6	1.92	0.00814	0.68948
GO:0006936	muscle contraction	102	21	12.26	0.00861	0.702712
GO:0009142	nucleoside triphosphate biosynthetic pro...	42	11	5.05	0.00891	0.702712
GO:0060976	coronary vasculature development	26	8	3.13	0.00899	0.702712
GO:0033344	cholesterol efflux	12	5	1.44	0.00947	0.702712
GO:0009060	aerobic respiration	48	12	5.77	0.00950	0.702712
GO:0051147	regulation of muscle cell differentiatio...	54	13	6.49	0.00986	0.702712
GO:0003012	muscle system process	136	26	16.35	0.01009	0.702712
GO:0072594	establishment of protein localization to...	136	26	16.35	0.01009	0.702712
GO:0006302	double-strand break repair	67	15	8.05	0.01156	0.746856
GO:0009145	purine nucleoside triphosphate biosynthe...	38	10	4.57	0.01199	0.746856
GO:0009206	purine ribonucleoside triphosphate biosy...	38	10	4.57	0.01199	0.746856
GO:0016570	histone modification	105	21	12.62	0.01199	0.746856
GO:0051276	chromosome organization	270	45	32.46	0.01248	0.746856
GO:0035051	cardiocyte differentiation	62	14	7.45	0.01341	0.746856
GO:0032781	positive regulation of ATPase activity	13	5	1.56	0.01390	0.746856
GO:0090151	establishment of protein localization to...	13	5	1.56	0.01390	0.746856
GO:0034728	nucleosome organization	28	8	3.37	0.01441	0.746856
GO:0055123	digestive system development	28	8	3.37	0.01441	0.746856
GO:0001570	vasculogenesis	39	10	4.69	0.01444	0.746856
GO:0009201	ribonucleoside triphosphate biosynthetic...	39	10	4.69	0.01444	0.746856
GO:0019827	stem cell population maintenance	39	10	4.69	0.01444	0.746856
GO:0045935	positive regulation of nucleobase-contai...	448	69	53.86	0.01449	0.746856
GO:0055001	muscle cell development	75	16	9.02	0.01472	0.746856
GO:0016569	covalent chromatin modification	107	21	12.86	0.01478	0.746856
GO:0009205	purine ribonucleoside triphosphate metab...	45	11	5.41	0.01515	0.746856
GO:0051205	protein insertion into membrane	18	6	2.16	0.01530	0.746856
GO:0030308	negative regulation of cell growth	51	12	6.13	0.01548	0.746856
GO:0072359	circulatory system development	390	61	46.88	0.01549	0.746856
GO:0051145	smooth muscle cell differentiation	34	9	4.09	0.01617	0.76783
GO:0010927	cellular component assembly involved in ...	40	10	4.81	0.01725	0.806888
GO:0009199	ribonucleoside triphosphate metabolic pr...	46	11	5.53	0.01782	0.80939
GO:0031056	regulation of histone modification	46	11	5.53	0.01782	0.80939
GO:0048585	negative regulation of response to stimu...	461	70	55.42	0.01885	0.843941
GO:0032092	positive regulation of protein binding	35	9	4.21	0.01952	0.858963
GO:0044743	protein transmembrane import into intrac...	19	6	2.28	0.02015	0.858963
GO:0006626	protein targeting to mitochondrion	41	10	4.93	0.02044	0.858963
GO:0098727	maintenance of cell number	41	10	4.93	0.02044	0.858963
GO:1902275	regulation of chromatin organization	53	12	6.37	0.02083	0.858963
GO:0030010	establishment of cell polarity	47	11	5.65	0.02083	0.858963
GO:1903311	regulation of mRNA metabolic process	85	17	10.22	0.02247	0.881893
GO:0055006	cardiac cell development	36	9	4.33	0.02335	0.881893
GO:0006122	mitochondrial electron transport, ubiqui...	10	4	1.2	0.02394	0.881893
GO:0045940	positive regulation of steroid metabolic...	10	4	1.2	0.02394	0.881893
GO:0035265	organ growth	54	12	6.49	0.02396	0.881893
GO:0060420	regulation of heart growth	25	7	3.01	0.02415	0.881893
GO:0065002	intracellular protein transmembrane tran...	25	7	3.01	0.02415	0.881893
GO:1904705	regulation of vascular associated smooth...	25	7	3.01	0.02415	0.881893
GO:1990874	vascular associated smooth muscle cell p...	25	7	3.01	0.02415	0.881893
GO:2001252	positive regulation of chromosome organi...	48	11	5.77	0.02420	0.881893
GO:0008535	respiratory chain complex IV assembly	15	5	1.8	0.02647	0.891279
GO:0010614	negative regulation of cardiac muscle hy...	15	5	1.8	0.02647	0.891279
GO:0032350	regulation of hormone metabolic process	15	5	1.8	0.02647	0.891279
GO:0019218	regulation of steroid metabolic process	31	8	3.73	0.02649	0.891279
GO:0051254	positive regulation of RNA metabolic pro...	401	61	48.21	0.02665	0.891279
GO:0003231	cardiac ventricle development	37	9	4.45	0.02769	0.891279
GO:0006338	chromatin remodeling	37	9	4.45	0.02769	0.891279
GO:0043502	regulation of muscle adaptation	37	9	4.45	0.02769	0.891279
GO:0009144	purine nucleoside triphosphate metabolic...	49	11	5.89	0.02795	0.891279
GO:0009891	positive regulation of biosynthetic proc...	494	73	59.39	0.02971	0.891279
GO:0045666	positive regulation of neuron differenti...	26	7	3.13	0.02973	0.891279
GO:0071806	protein transmembrane transport	26	7	3.13	0.02973	0.891279
GO:0022613	ribonucleoprotein complex biogenesis	156	27	18.75	0.03055	0.891279
GO:0071560	cellular response to transforming growth...	75	15	9.02	0.03091	0.891279
GO:0008406	gonad development	56	12	6.73	0.03125	0.891279
GO:0009141	nucleoside triphosphate metabolic proces...	56	12	6.73	0.03125	0.891279
GO:0003205	cardiac chamber development	50	11	6.01	0.03209	0.891279
GO:0003206	cardiac chamber morphogenesis	38	9	4.57	0.03256	0.891279
GO:0017015	regulation of transforming growth factor...	44	10	5.29	0.03259	0.891279
GO:1903844	regulation of cellular response to trans...	44	10	5.29	0.03259	0.891279
GO:0003208	cardiac ventricle morphogenesis	21	6	2.52	0.03274	0.891279
GO:0048662	negative regulation of smooth muscle cel...	21	6	2.52	0.03274	0.891279
GO:0061180	mammary gland epithelium development	21	6	2.52	0.03274	0.891279
GO:0071347	cellular response to interleukin-1	21	6	2.52	0.03274	0.891279
GO:0062012	regulation of small molecule metabolic p...	102	19	12.26	0.03279	0.891279
GO:0010939	regulation of necrotic cell death	11	4	1.32	0.03413	0.891279
GO:0050779	RNA destabilization	11	4	1.32	0.03413	0.891279
GO:0050999	regulation of nitric-oxide synthase acti...	11	4	1.32	0.03413	0.891279
GO:0051445	regulation of meiotic cell cycle	11	4	1.32	0.03413	0.891279
GO:0060193	positive regulation of lipase activity	11	4	1.32	0.03413	0.891279
GO:0061157	mRNA destabilization	11	4	1.32	0.03413	0.891279
GO:1902116	negative regulation of organelle assembl...	11	4	1.32	0.03413	0.891279
GO:1904738	vascular associated smooth muscle cell m...	11	4	1.32	0.03413	0.891279
GO:1904752	regulation of vascular associated smooth...	11	4	1.32	0.03413	0.891279
GO:0014741	negative regulation of muscle hypertroph...	16	5	1.92	0.03480	0.891279
GO:0051155	positive regulation of striated muscle c...	16	5	1.92	0.03480	0.891279
GO:0033365	protein localization to organelle	273	43	32.82	0.03498	0.891279
GO:0045137	development of primary sexual characteri...	57	12	6.85	0.03544	0.891339
GO:0048738	cardiac muscle tissue development	83	16	9.98	0.03601	0.891339
GO:0034968	histone lysine methylation	27	7	3.25	0.03612	0.891339
GO:0070555	response to interleukin-1	27	7	3.25	0.03612	0.891339
GO:0009968	negative regulation of signal transducti...	363	55	43.64	0.03677	0.90029
GO:0055007	cardiac muscle cell differentiation	45	10	5.41	0.03758	0.907655
GO:0051153	regulation of striated muscle cell diffe...	33	8	3.97	0.03765	0.907655
GO:0071559	response to transforming growth factor b...	77	15	9.26	0.03821	0.911234
GO:0010648	negative regulation of cell communicatio...	394	59	47.37	0.03838	0.911234
GO:0023057	negative regulation of signaling	395	59	47.49	0.04010	0.942754
GO:0043462	regulation of ATPase activity	22	6	2.64	0.04061	0.942754
GO:0055021	regulation of cardiac muscle tissue grow...	22	6	2.64	0.04061	0.942754
GO:0048638	regulation of developmental growth	105	19	12.62	0.04271	0.970645
GO:0045834	positive regulation of lipid metabolic p...	46	10	5.53	0.04306	0.970645
GO:0055002	striated muscle cell development	46	10	5.53	0.04306	0.970645
GO:0008585	female gonad development	28	7	3.37	0.04336	0.970645
GO:0060021	roof of mouth development	28	7	3.37	0.04336	0.970645
GO:0017148	negative regulation of translation	34	8	4.09	0.04426	0.973994
GO:0060419	heart growth	34	8	4.09	0.04426	0.973994
GO:0006334	nucleosome assembly	12	4	1.44	0.04646	0.973994
GO:0010907	positive regulation of glucose metabolic...	12	4	1.44	0.04646	0.973994
GO:0032784	regulation of DNA-templated transcriptio...	12	4	1.44	0.04646	0.973994
GO:0033617	mitochondrial cytochrome c oxidase assem...	12	4	1.44	0.04646	0.973994
GO:0042776	mitochondrial ATP synthesis coupled prot...	12	4	1.44	0.04646	0.973994
GO:0043044	ATP-dependent chromatin remodeling	12	4	1.44	0.04646	0.973994
GO:0046885	regulation of hormone biosynthetic proce...	12	4	1.44	0.04646	0.973994
GO:0042113	B cell activation	66	13	7.93	0.04762	0.973994
GO:0016071	mRNA metabolic process	206	33	24.76	0.04894	0.973994
GO:1990542	mitochondrial transmembrane transport	47	10	5.65	0.04907	0.973994
GO:0019319	hexose biosynthetic process	23	6	2.77	0.04956	0.973994
GO:0048565	digestive tract development	23	6	2.77	0.04956	0.973994
GO:0051149	positive regulation of muscle cell diffe...	23	6	2.77	0.04956	0.973994
GO:0051146	striated muscle cell differentiation	100	18	12.02	0.04987	0.973994
GO:0022612	gland morphogenesis	41	9	4.93	0.05065	0.973994
GO:0043500	muscle adaptation	41	9	4.93	0.05065	0.973994
GO:0062013	positive regulation of small molecule me...	41	9	4.93	0.05065	0.973994
GO:0010611	regulation of cardiac muscle hypertrophy	29	7	3.49	0.05147	0.973994
GO:0030032	lamellipodium assembly	29	7	3.49	0.05147	0.973994
GO:0042273	ribosomal large subunit biogenesis	29	7	3.49	0.05147	0.973994
GO:0046545	development of primary female sexual cha...	29	7	3.49	0.05147	0.973994
GO:0046824	positive regulation of nucleocytoplasmic...	29	7	3.49	0.05147	0.973994
GO:1903312	negative regulation of mRNA metabolic pr...	29	7	3.49	0.05147	0.973994
GO:0090288	negative regulation of cellular response...	35	8	4.21	0.05159	0.973994
GO:0045944	positive regulation of transcription by ...	281	43	33.78	0.05273	0.974098
GO:0051640	organelle localization	157	26	18.87	0.05350	0.974098
GO:0031667	response to nutrient levels	74	14	8.9	0.05487	0.974098
GO:0001541	ovarian follicle development	18	5	2.16	0.05583	0.974098
GO:0030514	negative regulation of BMP signaling pat...	18	5	2.16	0.05583	0.974098
GO:0045010	actin nucleation	18	5	2.16	0.05583	0.974098
GO:0071103	DNA conformation change	42	9	5.05	0.05790	0.974098
GO:0007548	sex differentiation	68	13	8.17	0.05855	0.974098
GO:0046890	regulation of lipid biosynthetic process	55	11	6.61	0.05945	0.974098
GO:0048754	branching morphogenesis of an epithelial...	55	11	6.61	0.05945	0.974098
GO:0022037	metencephalon development	24	6	2.89	0.05964	0.974098
GO:0050810	regulation of steroid biosynthetic proce...	24	6	2.89	0.05964	0.974098
GO:0051058	negative regulation of small GTPase medi...	24	6	2.89	0.05964	0.974098
GO:0016571	histone methylation	36	8	4.33	0.05966	0.974098
GO:0030879	mammary gland development	36	8	4.33	0.05966	0.974098
GO:0050864	regulation of B cell activation	36	8	4.33	0.05966	0.974098
GO:0090101	negative regulation of transmembrane rec...	36	8	4.33	0.05966	0.974098
GO:0090263	positive regulation of canonical Wnt sig...	36	8	4.33	0.05966	0.974098
GO:0014743	regulation of muscle hypertrophy	30	7	3.61	0.06048	0.974098
GO:0031058	positive regulation of histone modificat...	30	7	3.61	0.06048	0.974098
GO:0000288	nuclear-transcribed mRNA catabolic proce...	13	4	1.56	0.06092	0.974098
GO:0003298	physiological muscle hypertrophy	13	4	1.56	0.06092	0.974098
GO:0003301	physiological cardiac muscle hypertrophy	13	4	1.56	0.06092	0.974098
GO:0010591	regulation of lamellipodium assembly	13	4	1.56	0.06092	0.974098
GO:0032924	activin receptor signaling pathway	13	4	1.56	0.06092	0.974098
GO:0050829	defense response to Gram-negative bacter...	13	4	1.56	0.06092	0.974098
GO:0051150	regulation of smooth muscle cell differe...	13	4	1.56	0.06092	0.974098
GO:0061014	positive regulation of mRNA catabolic pr...	13	4	1.56	0.06092	0.974098
GO:0061049	cell growth involved in cardiac muscle c...	13	4	1.56	0.06092	0.974098
GO:0071985	multivesicular body sorting pathway	13	4	1.56	0.06092	0.974098
GO:0090257	regulation of muscle system process	82	15	9.86	0.06171	0.981722
GO:0006606	protein import into nucleus	49	10	5.89	0.06271	0.982666
GO:0051170	import into nucleus	49	10	5.89	0.06271	0.982666
GO:0072655	establishment of protein localization to...	49	10	5.89	0.06271	0.982666
GO:0006259	DNA metabolic process	241	37	28.97	0.06618	0.997823
GO:0003007	heart morphogenesis	76	14	9.14	0.06622	0.997823
GO:0042310	vasoconstriction	37	8	4.45	0.06848	0.997823
GO:0003151	outflow tract morphogenesis	19	5	2.28	0.06858	0.997823
GO:0006661	phosphatidylinositol biosynthetic proces...	19	5	2.28	0.06858	0.997823
GO:1901016	regulation of potassium ion transmembran...	19	5	2.28	0.06858	0.997823
GO:0010721	negative regulation of cell development	63	12	7.57	0.06906	0.997823
GO:0043491	protein kinase B signaling	63	12	7.57	0.06906	0.997823
GO:0010212	response to ionizing radiation	31	7	3.73	0.07039	0.997823
GO:0046660	female sex differentiation	31	7	3.73	0.07039	0.997823
GO:0055013	cardiac muscle cell development	31	7	3.73	0.07039	0.997823
GO:0055017	cardiac muscle tissue growth	31	7	3.73	0.07039	0.997823
GO:1905269	positive regulation of chromatin organiz...	31	7	3.73	0.07039	0.997823
GO:0046364	monosaccharide biosynthetic process	25	6	3.01	0.07085	0.997823
GO:1903313	positive regulation of mRNA metabolic pr...	25	6	3.01	0.07085	0.997823
GO:0042254	ribosome biogenesis	119	20	14.31	0.07352	0.997823
GO:0010565	regulation of cellular ketone metabolic ...	44	9	5.29	0.07433	0.997823
GO:0031328	positive regulation of cellular biosynth...	480	68	57.7	0.07524	0.997823
GO:0001708	cell fate specification	14	4	1.68	0.07748	0.997823
GO:0006111	regulation of gluconeogenesis	14	4	1.68	0.07748	0.997823
GO:0010830	regulation of myotube differentiation	14	4	1.68	0.07748	0.997823
GO:0019083	viral transcription	14	4	1.68	0.07748	0.997823
GO:0045746	negative regulation of Notch signaling p...	14	4	1.68	0.07748	0.997823
GO:0051293	establishment of spindle localization	14	4	1.68	0.07748	0.997823
GO:0051646	mitochondrion localization	14	4	1.68	0.07748	0.997823
GO:0051653	spindle localization	14	4	1.68	0.07748	0.997823
GO:0071479	cellular response to ionizing radiation	14	4	1.68	0.07748	0.997823
GO:0001763	morphogenesis of a branching structure	71	13	8.54	0.07790	0.997823
GO:0045930	negative regulation of mitotic cell cycl...	71	13	8.54	0.07790	0.997823
GO:0043488	regulation of mRNA stability	38	8	4.57	0.07806	0.997823
GO:0050684	regulation of mRNA processing	51	10	6.13	0.07859	0.997823
GO:0031032	actomyosin structure organization	78	14	9.38	0.07905	0.997823
GO:0090092	regulation of transmembrane receptor pro...	78	14	9.38	0.07905	0.997823
GO:0019216	regulation of lipid metabolic process	113	19	13.58	0.07938	0.997823
GO:0018205	peptidyl-lysine modification	99	17	11.9	0.08005	0.997823
GO:2000113	negative regulation of cellular macromol...	351	51	42.2	0.08051	0.997823
GO:1902749	regulation of cell cycle G2/M phase tran...	32	7	3.85	0.08121	0.997823
GO:0001825	blastocyst formation	20	5	2.4	0.08279	0.997823
GO:0090303	positive regulation of wound healing	20	5	2.4	0.08279	0.997823
GO:1905330	regulation of morphogenesis of an epithe...	20	5	2.4	0.08279	0.997823
GO:0048477	oogenesis	26	6	3.13	0.08318	0.997823
GO:0051148	negative regulation of muscle cell diffe...	26	6	3.13	0.08318	0.997823
GO:1903036	positive regulation of response to wound...	26	6	3.13	0.08318	0.997823
GO:1904591	positive regulation of protein import	26	6	3.13	0.08318	0.997823
GO:0033044	regulation of chromosome organization	72	13	8.66	0.08517	0.997823
GO:0043409	negative regulation of MAPK cascade	52	10	6.25	0.08738	0.997823
GO:0070585	protein localization to mitochondrion	52	10	6.25	0.08738	0.997823
GO:1902680	positive regulation of RNA biosynthetic ...	369	53	44.36	0.08926	0.997823
GO:0048514	blood vessel morphogenesis	255	38	30.66	0.09013	0.997823
GO:0006397	mRNA processing	151	24	18.15	0.09021	0.997823
GO:0051099	positive regulation of binding	66	12	7.93	0.09179	0.997823
GO:0008203	cholesterol metabolic process	33	7	3.97	0.09294	0.997823
GO:0018022	peptidyl-lysine methylation	33	7	3.97	0.09294	0.997823
GO:0051056	regulation of small GTPase mediated sign...	94	16	11.3	0.09322	0.997823
GO:0040008	regulation of growth	181	28	21.76	0.09330	0.997823
GO:0046822	regulation of nucleocytoplasmic transpor...	46	9	5.53	0.09337	0.997823
GO:0050768	negative regulation of neurogenesis	46	9	5.53	0.09337	0.997823
GO:0071824	protein-DNA complex subunit organization	46	9	5.53	0.09337	0.997823
GO:1902532	negative regulation of intracellular sig...	152	24	18.27	0.09558	0.997823
GO:0006406	mRNA export from nucleus	15	4	1.8	0.09604	0.997823
GO:0030888	regulation of B cell proliferation	15	4	1.8	0.09604	0.997823
GO:0031572	G2 DNA damage checkpoint	15	4	1.8	0.09604	0.997823
GO:0035886	vascular associated smooth muscle cell d...	15	4	1.8	0.09604	0.997823
GO:0051154	negative regulation of striated muscle c...	15	4	1.8	0.09604	0.997823
GO:0071427	mRNA-containing ribonucleoprotein comple...	15	4	1.8	0.09604	0.997823
GO:0090162	establishment of epithelial cell polarit...	15	4	1.8	0.09604	0.997823
GO:1904036	negative regulation of epithelial cell a...	15	4	1.8	0.09604	0.997823
GO:0071426	ribonucleoprotein complex export from nu...	27	6	3.25	0.09663	0.997823
GO:1904063	negative regulation of cation transmembr...	27	6	3.25	0.09663	0.997823
GO:0010558	negative regulation of macromolecule bio...	356	51	42.8	0.09756	0.997823
GO:0031060	regulation of histone methylation	21	5	2.52	0.09843	0.997823
GO:0031497	chromatin assembly	21	5	2.52	0.09843	0.997823
GO:0042446	hormone biosynthetic process	21	5	2.52	0.09843	0.997823
GO:0051781	positive regulation of cell division	21	5	2.52	0.09843	0.997823
GO:0048660	regulation of smooth muscle cell prolife...	60	11	7.21	0.09895	0.997823
GO:0001568	blood vessel development	280	41	33.66	0.09949	0.997823
GO:0090287	regulation of cellular response to growt...	102	17	12.26	0.09950	0.997823
GO:0061138	morphogenesis of a branching epithelium	67	12	8.05	0.10028	0.997823
GO:0006839	mitochondrial transport	95	16	11.42	0.10030	0.997823
GO:0006401	RNA catabolic process	74	13	8.9	0.10095	0.997823
GO:0003300	cardiac muscle hypertrophy	34	7	4.09	0.10556	0.997823
GO:0016125	sterol metabolic process	34	7	4.09	0.10556	0.997823
GO:0051896	regulation of protein kinase B signaling	54	10	6.49	0.10667	0.997823
GO:0048659	smooth muscle cell proliferation	61	11	7.33	0.10836	0.997823
GO:0061458	reproductive system development	125	20	15.03	0.10885	0.997823
GO:1901361	organic cyclic compound catabolic proces...	125	20	15.03	0.10885	0.997823
GO:0000054	ribosomal subunit export from nucleus	10	3	1.2	0.10893	0.997823
GO:0010458	exit from mitosis	10	3	1.2	0.10893	0.997823
GO:0023058	adaptation of signaling pathway	10	3	1.2	0.10893	0.997823
GO:0030194	positive regulation of blood coagulation	10	3	1.2	0.10893	0.997823
GO:0032365	intracellular lipid transport	10	3	1.2	0.10893	0.997823
GO:0033750	ribosome localization	10	3	1.2	0.10893	0.997823
GO:0034243	regulation of transcription elongation f...	10	3	1.2	0.10893	0.997823
GO:0048536	spleen development	10	3	1.2	0.10893	0.997823
GO:0048641	regulation of skeletal muscle tissue dev...	10	3	1.2	0.10893	0.997823
GO:0051590	positive regulation of neurotransmitter ...	10	3	1.2	0.10893	0.997823
GO:0071428	rRNA-containing ribonucleoprotein comple...	10	3	1.2	0.10893	0.997823
GO:1900048	positive regulation of hemostasis	10	3	1.2	0.10893	0.997823
GO:1905314	semi-lunar valve development	10	3	1.2	0.10893	0.997823
GO:0051253	negative regulation of RNA metabolic pro...	336	48	40.39	0.10943	0.997823
GO:0048732	gland development	118	19	14.19	0.11065	0.997823
GO:0002832	negative regulation of response to bioti...	28	6	3.37	0.11116	0.997823
GO:0006323	DNA packaging	28	6	3.37	0.11116	0.997823
GO:0071166	ribonucleoprotein complex localization	28	6	3.37	0.11116	0.997823
GO:0000724	double-strand break repair via homologou...	41	8	4.93	0.11134	0.997823
GO:0000725	recombinational repair	41	8	4.93	0.11134	0.997823
GO:0016573	histone acetylation	41	8	4.93	0.11134	0.997823
GO:0043487	regulation of RNA stability	41	8	4.93	0.11134	0.997823
GO:0061013	regulation of mRNA catabolic process	41	8	4.93	0.11134	0.997823
GO:0048589	developmental growth	207	31	24.89	0.11172	0.997823
GO:0045893	positive regulation of transcription, DN...	368	52	44.24	0.11391	0.997823
GO:1903508	positive regulation of nucleic acid-temp...	368	52	44.24	0.11391	0.997823
GO:0051961	negative regulation of nervous system de...	48	9	5.77	0.11499	0.997823
GO:0006094	gluconeogenesis	22	5	2.64	0.11544	0.997823
GO:0042307	positive regulation of protein import in...	22	5	2.64	0.11544	0.997823
GO:0046580	negative regulation of Ras protein signa...	22	5	2.64	0.11544	0.997823
GO:1902750	negative regulation of cell cycle G2/M p...	22	5	2.64	0.11544	0.997823
GO:0006303	double-strand break repair via nonhomolo...	16	4	1.92	0.11645	0.997823
GO:0010712	regulation of collagen metabolic process	16	4	1.92	0.11645	0.997823
GO:0032413	negative regulation of ion transmembrane...	16	4	1.92	0.11645	0.997823
GO:0032768	regulation of monooxygenase activity	16	4	1.92	0.11645	0.997823
GO:0045214	sarcomere organization	16	4	1.92	0.11645	0.997823
GO:0048599	oocyte development	16	4	1.92	0.11645	0.997823
GO:0055010	ventricular cardiac muscle tissue morpho...	16	4	1.92	0.11645	0.997823
GO:0070265	necrotic cell death	16	4	1.92	0.11645	0.997823
GO:0044089	positive regulation of cellular componen...	163	25	19.6	0.11653	0.997823
GO:0060562	epithelial tube morphogenesis	119	19	14.31	0.11771	0.997823
GO:0022618	ribonucleoprotein complex assembly	62	11	7.45	0.11828	0.997823
GO:0031334	positive regulation of protein-containin...	76	13	9.14	0.11838	0.997823
GO:0002377	immunoglobulin production	35	7	4.21	0.11905	0.997823
GO:0009566	fertilization	35	7	4.21	0.11905	0.997823
GO:0014896	muscle hypertrophy	35	7	4.21	0.11905	0.997823
GO:0014897	striated muscle hypertrophy	35	7	4.21	0.11905	0.997823
GO:0051897	positive regulation of protein kinase B ...	35	7	4.21	0.11905	0.997823
GO:1901890	positive regulation of cell junction ass...	35	7	4.21	0.11905	0.997823
GO:0042127	regulation of cell population proliferat...	471	65	56.62	0.12041	0.997823
GO:1902850	microtubule cytoskeleton organization in...	42	8	5.05	0.12391	0.997823
GO:0035239	tube morphogenesis	324	46	38.95	0.12407	0.997823
GO:0006281	DNA repair	142	22	17.07	0.12450	0.997823
GO:0060537	muscle tissue development	142	22	17.07	0.12450	0.997823
GO:0051093	negative regulation of developmental pro...	301	43	36.19	0.12466	0.997823
GO:0007417	central nervous system development	240	35	28.85	0.12602	0.997823
GO:0009991	response to extracellular stimulus	84	14	10.1	0.12657	0.997823
GO:0006333	chromatin assembly or disassembly	29	6	3.49	0.12673	0.997823
GO:0006405	RNA export from nucleus	29	6	3.49	0.12673	0.997823
GO:0030326	embryonic limb morphogenesis	29	6	3.49	0.12673	0.997823
GO:0035113	embryonic appendage morphogenesis	29	6	3.49	0.12673	0.997823
GO:0035904	aorta development	29	6	3.49	0.12673	0.997823
GO:0051881	regulation of mitochondrial membrane pot...	29	6	3.49	0.12673	0.997823
GO:0061178	regulation of insulin secretion involved...	29	6	3.49	0.12673	0.997823
GO:1901654	response to ketone	29	6	3.49	0.12673	0.997823
GO:0014706	striated muscle tissue development	135	21	16.23	0.12720	0.997823
GO:0033002	muscle cell proliferation	77	13	9.26	0.12771	0.997823
GO:0010948	negative regulation of cell cycle proces...	70	12	8.42	0.12846	0.997823
GO:0042180	cellular ketone metabolic process	70	12	8.42	0.12846	0.997823
GO:0006939	smooth muscle contraction	36	7	4.33	0.13339	0.997823
GO:0051028	mRNA transport	36	7	4.33	0.13339	0.997823
GO:0097581	lamellipodium organization	36	7	4.33	0.13339	0.997823
GO:0017004	cytochrome complex assembly	23	5	2.77	0.13374	0.997823
GO:1901987	regulation of cell cycle phase transitio...	92	15	11.06	0.13392	0.997823
GO:0007346	regulation of mitotic cell cycle	136	21	16.35	0.13441	0.997823
GO:0040007	growth	280	40	33.66	0.13490	0.997823
GO:0007420	brain development	166	25	19.96	0.13564	0.997823
GO:0000132	establishment of mitotic spindle orienta...	11	3	1.32	0.13698	0.997823
GO:0002082	regulation of oxidative phosphorylation	11	3	1.32	0.13698	0.997823
GO:0007095	mitotic G2 DNA damage checkpoint	11	3	1.32	0.13698	0.997823
GO:0009620	response to fungus	11	3	1.32	0.13698	0.997823
GO:0010463	mesenchymal cell proliferation	11	3	1.32	0.13698	0.997823
GO:0010517	regulation of phospholipase activity	11	3	1.32	0.13698	0.997823
GO:0010559	regulation of glycoprotein biosynthetic ...	11	3	1.32	0.13698	0.997823
GO:0010714	positive regulation of collagen metaboli...	11	3	1.32	0.13698	0.997823
GO:0010742	macrophage derived foam cell differentia...	11	3	1.32	0.13698	0.997823
GO:0010800	positive regulation of peptidyl-threonin...	11	3	1.32	0.13698	0.997823
GO:0030212	hyaluronan metabolic process	11	3	1.32	0.13698	0.997823
GO:0032373	positive regulation of sterol transport	11	3	1.32	0.13698	0.997823
GO:0032376	positive regulation of cholesterol trans...	11	3	1.32	0.13698	0.997823
GO:0032509	endosome transport via multivesicular bo...	11	3	1.32	0.13698	0.997823
GO:0032967	positive regulation of collagen biosynth...	11	3	1.32	0.13698	0.997823
GO:0035066	positive regulation of histone acetylati...	11	3	1.32	0.13698	0.997823
GO:0040001	establishment of mitotic spindle localiz...	11	3	1.32	0.13698	0.997823
GO:0045742	positive regulation of epidermal growth ...	11	3	1.32	0.13698	0.997823
GO:0045776	negative regulation of blood pressure	11	3	1.32	0.13698	0.997823
GO:0048546	digestive tract morphogenesis	11	3	1.32	0.13698	0.997823
GO:0051125	regulation of actin nucleation	11	3	1.32	0.13698	0.997823
GO:0051294	establishment of spindle orientation	11	3	1.32	0.13698	0.997823
GO:0060043	regulation of cardiac muscle cell prolif...	11	3	1.32	0.13698	0.997823
GO:0061050	regulation of cell growth involved in ca...	11	3	1.32	0.13698	0.997823
GO:0070306	lens fiber cell differentiation	11	3	1.32	0.13698	0.997823
GO:0071827	plasma lipoprotein particle organization	11	3	1.32	0.13698	0.997823
GO:0072666	establishment of protein localization to...	11	3	1.32	0.13698	0.997823
GO:0090030	regulation of steroid hormone biosynthet...	11	3	1.32	0.13698	0.997823
GO:0120178	steroid hormone biosynthetic process	11	3	1.32	0.13698	0.997823
GO:1902745	positive regulation of lamellipodium org...	11	3	1.32	0.13698	0.997823
GO:1903018	regulation of glycoprotein metabolic pro...	11	3	1.32	0.13698	0.997823
GO:1905332	positive regulation of morphogenesis of ...	11	3	1.32	0.13698	0.997823
GO:2000242	negative regulation of reproductive proc...	11	3	1.32	0.13698	0.997823
GO:2001258	negative regulation of cation channel ac...	11	3	1.32	0.13698	0.997823
GO:0006475	internal protein amino acid acetylation	43	8	5.17	0.13719	0.997823
GO:0007030	Golgi organization	43	8	5.17	0.13719	0.997823
GO:0009267	cellular response to starvation	43	8	5.17	0.13719	0.997823
GO:0018393	internal peptidyl-lysine acetylation	43	8	5.17	0.13719	0.997823
GO:0030177	positive regulation of Wnt signaling pat...	43	8	5.17	0.13719	0.997823
GO:0042594	response to starvation	43	8	5.17	0.13719	0.997823
GO:0000726	non-recombinational repair	17	4	2.04	0.13856	0.997823
GO:0003254	regulation of membrane depolarization	17	4	2.04	0.13856	0.997823
GO:0009994	oocyte differentiation	17	4	2.04	0.13856	0.997823
GO:0010676	positive regulation of cellular carbohyd...	17	4	2.04	0.13856	0.997823
GO:0010762	regulation of fibroblast migration	17	4	2.04	0.13856	0.997823
GO:0045669	positive regulation of osteoblast differ...	17	4	2.04	0.13856	0.997823
GO:0051926	negative regulation of calcium ion trans...	17	4	2.04	0.13856	0.997823
GO:0051965	positive regulation of synapse assembly	17	4	2.04	0.13856	0.997823
GO:0072089	stem cell proliferation	17	4	2.04	0.13856	0.997823
GO:1902743	regulation of lamellipodium organization	17	4	2.04	0.13856	0.997823
GO:1903522	regulation of blood circulation	71	12	8.54	0.13874	0.997823
GO:0007264	small GTPase mediated signal transductio...	159	24	19.11	0.13900	0.997823
GO:0006611	protein export from nucleus	50	9	6.01	0.13913	0.997823
GO:0006402	mRNA catabolic process	64	11	7.69	0.13959	0.997823
GO:0007179	transforming growth factor beta receptor...	64	11	7.69	0.13959	0.997823
GO:0009152	purine ribonucleotide biosynthetic proce...	64	11	7.69	0.13959	0.997823
GO:0071826	ribonucleoprotein complex subunit organi...	64	11	7.69	0.13959	0.997823
GO:0090316	positive regulation of intracellular pro...	57	10	6.85	0.13980	0.997823
GO:0034504	protein localization to nucleus	93	15	11.18	0.14304	0.997823
GO:0035773	insulin secretion involved in cellular r...	30	6	3.61	0.14329	0.997823
GO:0010256	endomembrane system organization	130	20	15.63	0.14519	0.997823
GO:0007286	spermatid development	37	7	4.45	0.14853	0.997823
GO:0007292	female gamete generation	37	7	4.45	0.14853	0.997823
GO:1903829	positive regulation of cellular protein ...	101	16	12.14	0.14955	0.997823
GO:0010557	positive regulation of macromolecule bio...	447	61	53.74	0.15046	0.997823
GO:0009952	anterior/posterior pattern specification	44	8	5.29	0.15116	0.997823
GO:0018394	peptidyl-lysine acetylation	44	8	5.29	0.15116	0.997823
GO:0038061	NIK/NF-kappaB signaling	44	8	5.29	0.15116	0.997823
GO:0031669	cellular response to nutrient levels	51	9	6.13	0.15210	0.997823
GO:0051168	nuclear export	51	9	6.13	0.15210	0.997823
GO:0055088	lipid homeostasis	51	9	6.13	0.15210	0.997823
GO:1901988	negative regulation of cell cycle phase ...	51	9	6.13	0.15210	0.997823
GO:0045596	negative regulation of cell differentiat...	214	31	25.73	0.15216	0.997823
GO:0003006	developmental process involved in reprod...	237	34	28.49	0.15225	0.997823
GO:0006970	response to osmotic stress	24	5	2.89	0.15323	0.997823
GO:0097006	regulation of plasma lipoprotein particl...	24	5	2.89	0.15323	0.997823
GO:0098586	cellular response to virus	24	5	2.89	0.15323	0.997823
GO:0034655	nucleobase-containing compound catabolic...	109	17	13.1	0.15542	0.997823
GO:0048608	reproductive structure development	124	19	14.91	0.15694	0.997823
GO:0008202	steroid metabolic process	80	13	9.62	0.15809	0.997823
GO:0006605	protein targeting	102	16	12.26	0.15886	0.997823
GO:0051052	regulation of DNA metabolic process	102	16	12.26	0.15886	0.997823
GO:0072522	purine-containing compound biosynthetic ...	73	12	8.78	0.16059	0.997823
GO:0019439	aromatic compound catabolic process	117	18	14.07	0.16073	0.997823
GO:0001776	leukocyte homeostasis	31	6	3.73	0.16079	0.997823
GO:0010389	regulation of G2/M transition of mitotic...	31	6	3.73	0.16079	0.997823
GO:0008380	RNA splicing	132	20	15.87	0.16146	0.997823
GO:0003229	ventricular cardiac muscle tissue develo...	18	4	2.16	0.16220	0.997823
GO:0010812	negative regulation of cell-substrate ad...	18	4	2.16	0.16220	0.997823
GO:0019080	viral gene expression	18	4	2.16	0.16220	0.997823
GO:0035909	aorta morphogenesis	18	4	2.16	0.16220	0.997823
GO:0048255	mRNA stabilization	18	4	2.16	0.16220	0.997823
GO:0060191	regulation of lipase activity	18	4	2.16	0.16220	0.997823
GO:0070613	regulation of protein processing	18	4	2.16	0.16220	0.997823
GO:0072665	protein localization to vacuole	18	4	2.16	0.16220	0.997823
GO:1902893	regulation of pri-miRNA transcription by...	18	4	2.16	0.16220	0.997823
GO:1902930	regulation of alcohol biosynthetic proce...	18	4	2.16	0.16220	0.997823
GO:0019221	cytokine-mediated signaling pathway	95	15	11.42	0.16229	0.997823
GO:0007281	germ cell development	66	11	7.93	0.16279	0.997823
GO:0006694	steroid biosynthetic process	38	7	4.57	0.16445	0.997823
GO:0030534	adult behavior	38	7	4.57	0.16445	0.997823
GO:0048515	spermatid differentiation	38	7	4.57	0.16445	0.997823
GO:1900182	positive regulation of protein localizat...	38	7	4.57	0.16445	0.997823
GO:1902652	secondary alcohol metabolic process	38	7	4.57	0.16445	0.997823
GO:2000027	regulation of animal organ morphogenesis	38	7	4.57	0.16445	0.997823
GO:0006403	RNA localization	59	10	7.09	0.16455	0.997823
GO:0030900	forebrain development	88	14	10.58	0.16568	0.997823
GO:0006457	protein folding	45	8	5.41	0.16578	0.997823
GO:0007006	mitochondrial membrane organization	45	8	5.41	0.16578	0.997823
GO:0003179	heart valve morphogenesis	12	3	1.44	0.16716	0.997823
GO:0006505	GPI anchor metabolic process	12	3	1.44	0.16716	0.997823
GO:0006506	GPI anchor biosynthetic process	12	3	1.44	0.16716	0.997823
GO:0010259	multicellular organism aging	12	3	1.44	0.16716	0.997823
GO:0010718	positive regulation of epithelial to mes...	12	3	1.44	0.16716	0.997823
GO:0021766	hippocampus development	12	3	1.44	0.16716	0.997823
GO:0030318	melanocyte differentiation	12	3	1.44	0.16716	0.997823
GO:0032392	DNA geometric change	12	3	1.44	0.16716	0.997823
GO:0032508	DNA duplex unwinding	12	3	1.44	0.16716	0.997823
GO:0034314	Arp2/3 complex-mediated actin nucleation	12	3	1.44	0.16716	0.997823
GO:0039694	viral RNA genome replication	12	3	1.44	0.16716	0.997823
GO:0043370	regulation of CD4-positive, alpha-beta T...	12	3	1.44	0.16716	0.997823
GO:0046164	alcohol catabolic process	12	3	1.44	0.16716	0.997823
GO:0050820	positive regulation of coagulation	12	3	1.44	0.16716	0.997823
GO:0071825	protein-lipid complex subunit organizati...	12	3	1.44	0.16716	0.997823
GO:0072091	regulation of stem cell proliferation	12	3	1.44	0.16716	0.997823
GO:0072395	signal transduction involved in cell cyc...	12	3	1.44	0.16716	0.997823
GO:0072401	signal transduction involved in DNA inte...	12	3	1.44	0.16716	0.997823
GO:0072422	signal transduction involved in DNA dama...	12	3	1.44	0.16716	0.997823
GO:0090077	foam cell differentiation	12	3	1.44	0.16716	0.997823
GO:1901186	positive regulation of ERBB signaling pa...	12	3	1.44	0.16716	0.997823
GO:1904894	positive regulation of receptor signalin...	12	3	1.44	0.16716	0.997823
GO:2000008	regulation of protein localization to ce...	12	3	1.44	0.16716	0.997823
GO:2000758	positive regulation of peptidyl-lysine a...	12	3	1.44	0.16716	0.997823
GO:0031327	negative regulation of cellular biosynth...	372	51	44.72	0.16784	0.997823
GO:0001944	vasculature development	294	41	35.34	0.16904	0.997823
GO:0007186	G protein-coupled receptor signaling pat...	171	25	20.56	0.17137	0.997823
GO:0061061	muscle structure development	217	31	26.09	0.17182	0.997823
GO:0007498	mesoderm development	25	5	3.01	0.17383	0.997823
GO:0070373	negative regulation of ERK1 and ERK2 cas...	25	5	3.01	0.17383	0.997823
GO:0098900	regulation of action potential	25	5	3.01	0.17383	0.997823
GO:1901992	positive regulation of mitotic cell cycl...	25	5	3.01	0.17383	0.997823
GO:0048646	anatomical structure formation involved ...	389	53	46.76	0.17437	0.997823
GO:0009260	ribonucleotide biosynthetic process	67	11	8.05	0.17507	0.997823
GO:0045892	negative regulation of transcription, DN...	303	42	36.43	0.17603	0.997823
GO:0045934	negative regulation of nucleobase-contai...	358	49	43.04	0.17688	0.997823
GO:0006913	nucleocytoplasmic transport	104	16	12.5	0.17839	0.997823
GO:0051169	nuclear transport	104	16	12.5	0.17839	0.997823
GO:0010564	regulation of cell cycle process	172	25	20.68	0.17908	0.997823
GO:0008584	male gonad development	32	6	3.85	0.17915	0.997823
GO:0018107	peptidyl-threonine phosphorylation	32	6	3.85	0.17915	0.997823
GO:0030510	regulation of BMP signaling pathway	32	6	3.85	0.17915	0.997823
GO:0046546	development of primary male sexual chara...	32	6	3.85	0.17915	0.997823
GO:1904589	regulation of protein import	32	6	3.85	0.17915	0.997823
GO:0009890	negative regulation of biosynthetic proc...	390	53	46.88	0.17957	0.997823
GO:0006310	DNA recombination	82	13	9.86	0.18024	0.997823
GO:0006974	cellular response to DNA damage stimulus	226	32	27.17	0.18059	0.997823
GO:0032273	positive regulation of protein polymeriz...	46	8	5.53	0.18103	0.997823
GO:0034249	negative regulation of cellular amide me...	46	8	5.53	0.18103	0.997823
GO:0030902	hindbrain development	39	7	4.69	0.18108	0.997823
GO:0046661	male sex differentiation	39	7	4.69	0.18108	0.997823
GO:0060840	artery development	39	7	4.69	0.18108	0.997823
GO:1902679	negative regulation of RNA biosynthetic ...	304	42	36.55	0.18192	0.997823
GO:1903507	negative regulation of nucleic acid-temp...	304	42	36.55	0.18192	0.997823
GO:0033500	carbohydrate homeostasis	75	12	9.02	0.18408	0.997823
GO:0042593	glucose homeostasis	75	12	9.02	0.18408	0.997823
GO:0001569	branching involved in blood vessel morph...	19	4	2.28	0.18717	0.997823
GO:0002260	lymphocyte homeostasis	19	4	2.28	0.18717	0.997823
GO:0007007	inner mitochondrial membrane organizatio...	19	4	2.28	0.18717	0.997823
GO:0021954	central nervous system neuron developmen...	19	4	2.28	0.18717	0.997823
GO:0033120	positive regulation of RNA splicing	19	4	2.28	0.18717	0.997823
GO:0033627	cell adhesion mediated by integrin	19	4	2.28	0.18717	0.997823
GO:0042100	B cell proliferation	19	4	2.28	0.18717	0.997823
GO:0042181	ketone biosynthetic process	19	4	2.28	0.18717	0.997823
GO:0061614	pri-miRNA transcription by RNA polymeras...	19	4	2.28	0.18717	0.997823
GO:0072348	sulfur compound transport	19	4	2.28	0.18717	0.997823
GO:1902305	regulation of sodium ion transmembrane t...	19	4	2.28	0.18717	0.997823
GO:1903317	regulation of protein maturation	19	4	2.28	0.18717	0.997823
GO:0045786	negative regulation of cell cycle	135	20	16.23	0.18763	0.997823
GO:1903047	mitotic cell cycle process	204	29	24.52	0.18890	0.997823
GO:0010638	positive regulation of organelle organiz...	181	26	21.76	0.18961	0.997823
GO:0021537	telencephalon development	61	10	7.33	0.19126	0.997823
GO:1903827	regulation of cellular protein localizat...	189	27	22.72	0.19205	0.997823
GO:0007265	Ras protein signal transduction	128	19	15.39	0.19289	0.997823
GO:0008285	negative regulation of cell population p...	197	28	23.68	0.19430	0.997823
GO:0021915	neural tube development	54	9	6.49	0.19436	0.997823
GO:0050657	nucleic acid transport	54	9	6.49	0.19436	0.997823
GO:0050658	RNA transport	54	9	6.49	0.19436	0.997823
GO:0051236	establishment of RNA localization	54	9	6.49	0.19436	0.997823
GO:0014910	regulation of smooth muscle cell migrati...	26	5	3.13	0.19541	0.997823
GO:0019229	regulation of vasoconstriction	26	5	3.13	0.19541	0.997823
GO:0045921	positive regulation of exocytosis	26	5	3.13	0.19541	0.997823
GO:0048146	positive regulation of fibroblast prolif...	26	5	3.13	0.19541	0.997823
GO:1904892	regulation of receptor signaling pathway...	26	5	3.13	0.19541	0.997823
GO:0021782	glial cell development	47	8	5.65	0.19686	0.997823
GO:0007127	meiosis I	33	6	3.97	0.19831	0.997823
GO:0042632	cholesterol homeostasis	33	6	3.97	0.19831	0.997823
GO:0055092	sterol homeostasis	33	6	3.97	0.19831	0.997823
GO:0030856	regulation of epithelial cell differenti...	40	7	4.81	0.19839	0.997823
GO:0044839	cell cycle G2/M phase transition	40	7	4.81	0.19839	0.997823
GO:0051302	regulation of cell division	40	7	4.81	0.19839	0.997823
GO:1901222	regulation of NIK/NF-kappaB signaling	40	7	4.81	0.19839	0.997823
GO:0000470	maturation of LSU-rRNA	13	3	1.56	0.19903	0.997823
GO:0001960	negative regulation of cytokine-mediated...	13	3	1.56	0.19903	0.997823
GO:0022011	myelination in peripheral nervous system	13	3	1.56	0.19903	0.997823
GO:0032292	peripheral nervous system axon ensheathm...	13	3	1.56	0.19903	0.997823
GO:0034629	cellular protein-containing complex loca...	13	3	1.56	0.19903	0.997823
GO:0039528	cytoplasmic pattern recognition receptor...	13	3	1.56	0.19903	0.997823
GO:0042698	ovulation cycle	13	3	1.56	0.19903	0.997823
GO:0042733	embryonic digit morphogenesis	13	3	1.56	0.19903	0.997823
GO:0045191	regulation of isotype switching	13	3	1.56	0.19903	0.997823
GO:0051955	regulation of amino acid transport	13	3	1.56	0.19903	0.997823
GO:0071385	cellular response to glucocorticoid stim...	13	3	1.56	0.19903	0.997823
GO:0072698	protein localization to microtubule cyto...	13	3	1.56	0.19903	0.997823
GO:0086005	ventricular cardiac muscle cell action p...	13	3	1.56	0.19903	0.997823
GO:2000249	regulation of actin cytoskeleton reorgan...	13	3	1.56	0.19903	0.997823
GO:0035295	tube development	362	49	43.52	0.19928	0.997823
GO:0032989	cellular component morphogenesis	221	31	26.57	0.20010	0.997823
GO:0006164	purine nucleotide biosynthetic process	69	11	8.3	0.20090	0.997823
GO:0044270	cellular nitrogen compound catabolic pro...	114	17	13.7	0.20396	0.997823
GO:0046700	heterocycle catabolic process	114	17	13.7	0.20396	0.997823
GO:0045017	glycerolipid biosynthetic process	62	10	7.45	0.20529	0.997823
GO:0051321	meiotic cell cycle	62	10	7.45	0.20529	0.997823
GO:0048562	embryonic organ morphogenesis	77	12	9.26	0.20908	0.997823
GO:0007283	spermatogenesis	107	16	12.86	0.20980	0.997823
GO:0050806	positive regulation of synaptic transmis...	48	8	5.77	0.21323	0.997823
GO:0002381	immunoglobulin production involved in im...	20	4	2.4	0.21326	0.997823
GO:0002753	cytoplasmic pattern recognition receptor...	20	4	2.4	0.21326	0.997823
GO:0010972	negative regulation of G2/M transition o...	20	4	2.4	0.21326	0.997823
GO:0016447	somatic recombination of immunoglobulin ...	20	4	2.4	0.21326	0.997823
GO:0031122	cytoplasmic microtubule organization	20	4	2.4	0.21326	0.997823
GO:0032410	negative regulation of transporter activ...	20	4	2.4	0.21326	0.997823
GO:0032465	regulation of cytokinesis	20	4	2.4	0.21326	0.997823
GO:0035065	regulation of histone acetylation	20	4	2.4	0.21326	0.997823
GO:0048260	positive regulation of receptor-mediated...	20	4	2.4	0.21326	0.997823
GO:0050771	negative regulation of axonogenesis	20	4	2.4	0.21326	0.997823
GO:0055008	cardiac muscle tissue morphogenesis	20	4	2.4	0.21326	0.997823
GO:0060393	regulation of pathway-restricted SMAD pr...	20	4	2.4	0.21326	0.997823
GO:0086004	regulation of cardiac muscle cell contra...	20	4	2.4	0.21326	0.997823
GO:1902373	negative regulation of mRNA catabolic pr...	20	4	2.4	0.21326	0.997823
GO:0007163	establishment or maintenance of cell pol...	70	11	8.42	0.21440	0.997823
GO:0030258	lipid modification	70	11	8.42	0.21440	0.997823
GO:0046390	ribose phosphate biosynthetic process	70	11	8.42	0.21440	0.997823
GO:1902904	negative regulation of supramolecular fi...	70	11	8.42	0.21440	0.997823
GO:0051345	positive regulation of hydrolase activit...	161	23	19.36	0.21544	0.997823
GO:0051130	positive regulation of cellular componen...	341	46	40.99	0.21560	0.997823
GO:0046578	regulation of Ras protein signal transdu...	85	13	10.22	0.21608	0.997823
GO:1902600	proton transmembrane transport	41	7	4.93	0.21631	0.997823
GO:0002028	regulation of sodium ion transport	27	5	3.25	0.21786	0.997823
GO:0015918	sterol transport	27	5	3.25	0.21786	0.997823
GO:0030301	cholesterol transport	27	5	3.25	0.21786	0.997823
GO:1901989	positive regulation of cell cycle phase ...	27	5	3.25	0.21786	0.997823
GO:0018210	peptidyl-threonine modification	34	6	4.09	0.21818	0.997823
GO:0030838	positive regulation of actin filament po...	34	6	4.09	0.21818	0.997823
GO:0043255	regulation of carbohydrate biosynthetic ...	34	6	4.09	0.21818	0.997823
GO:0045931	positive regulation of mitotic cell cycl...	34	6	4.09	0.21818	0.997823
GO:0061982	meiosis I cell cycle process	34	6	4.09	0.21818	0.997823
GO:0120162	positive regulation of cold-induced ther...	34	6	4.09	0.21818	0.997823
GO:0035264	multicellular organism growth	56	9	6.73	0.22502	0.997823
GO:0000278	mitotic cell cycle	248	34	29.81	0.22654	0.997823
GO:0044057	regulation of system process	170	24	20.44	0.22688	0.997823
GO:1901990	regulation of mitotic cell cycle phase t...	86	13	10.34	0.22867	0.997823
GO:0042445	hormone metabolic process	49	8	5.89	0.23010	0.997823
GO:1903046	meiotic cell cycle process	49	8	5.89	0.23010	0.997823
GO:0001655	urogenital system development	109	16	13.1	0.23205	0.997823
GO:0000027	ribosomal large subunit assembly	14	3	1.68	0.23217	0.997823
GO:0007129	homologous chromosome pairing at meiosis	14	3	1.68	0.23217	0.997823
GO:0008038	neuron recognition	14	3	1.68	0.23217	0.997823
GO:0010332	response to gamma radiation	14	3	1.68	0.23217	0.997823
GO:0030279	negative regulation of ossification	14	3	1.68	0.23217	0.997823
GO:0032892	positive regulation of organic acid tran...	14	3	1.68	0.23217	0.997823
GO:0038083	peptidyl-tyrosine autophosphorylation	14	3	1.68	0.23217	0.997823
GO:0043029	T cell homeostasis	14	3	1.68	0.23217	0.997823
GO:0045604	regulation of epidermal cell differentia...	14	3	1.68	0.23217	0.997823
GO:0045777	positive regulation of blood pressure	14	3	1.68	0.23217	0.997823
GO:0060688	regulation of morphogenesis of a branchi...	14	3	1.68	0.23217	0.997823
GO:0060761	negative regulation of response to cytok...	14	3	1.68	0.23217	0.997823
GO:0061098	positive regulation of protein tyrosine ...	14	3	1.68	0.23217	0.997823
GO:0071384	cellular response to corticosteroid stim...	14	3	1.68	0.23217	0.997823
GO:0090207	regulation of triglyceride metabolic pro...	14	3	1.68	0.23217	0.997823
GO:1901616	organic hydroxy compound catabolic proce...	14	3	1.68	0.23217	0.997823
GO:1901661	quinone metabolic process	14	3	1.68	0.23217	0.997823
GO:1902895	positive regulation of pri-miRNA transcr...	14	3	1.68	0.23217	0.997823
GO:1903725	regulation of phospholipid metabolic pro...	14	3	1.68	0.23217	0.997823
GO:1904376	negative regulation of protein localizat...	14	3	1.68	0.23217	0.997823
GO:2000273	positive regulation of signaling recepto...	14	3	1.68	0.23217	0.997823
GO:0007610	behavior	163	23	19.6	0.23374	0.997823
GO:0060828	regulation of canonical Wnt signaling pa...	79	12	9.5	0.23545	0.997823
GO:0007009	plasma membrane organization	35	6	4.21	0.23869	0.997823
GO:0008037	cell recognition	35	6	4.21	0.23869	0.997823
GO:0048259	regulation of receptor-mediated endocyto...	35	6	4.21	0.23869	0.997823
GO:0060322	head development	187	26	22.48	0.23976	0.997823
GO:0006023	aminoglycan biosynthetic process	21	4	2.52	0.24028	0.997823
GO:0010761	fibroblast migration	21	4	2.52	0.24028	0.997823
GO:0016445	somatic diversification of immunoglobuli...	21	4	2.52	0.24028	0.997823
GO:0021549	cerebellum development	21	4	2.52	0.24028	0.997823
GO:0030216	keratinocyte differentiation	21	4	2.52	0.24028	0.997823
GO:0040014	regulation of multicellular organism gro...	21	4	2.52	0.24028	0.997823
GO:0043489	RNA stabilization	21	4	2.52	0.24028	0.997823
GO:0060411	cardiac septum morphogenesis	21	4	2.52	0.24028	0.997823
GO:2000756	regulation of peptidyl-lysine acetylatio...	21	4	2.52	0.24028	0.997823
GO:0016579	protein deubiquitination	28	5	3.37	0.24106	0.997823
GO:0042255	ribosome assembly	28	5	3.37	0.24106	0.997823
GO:0042306	regulation of protein import into nucleu...	28	5	3.37	0.24106	0.997823
GO:0045445	myoblast differentiation	28	5	3.37	0.24106	0.997823
GO:0048844	artery morphogenesis	28	5	3.37	0.24106	0.997823
GO:0065004	protein-DNA complex assembly	28	5	3.37	0.24106	0.997823
GO:0010628	positive regulation of gene expression	345	46	41.48	0.24121	0.997823
GO:1903532	positive regulation of secretion by cell	87	13	10.46	0.24155	0.997823
GO:0032388	positive regulation of intracellular tra...	72	11	8.66	0.24249	0.997823
GO:0035023	regulation of Rho protein signal transdu...	50	8	6.01	0.24743	0.997823
GO:0007276	gamete generation	149	21	17.91	0.24836	0.997823
GO:0046777	protein autophosphorylation	65	10	7.81	0.24979	0.997823
GO:0009150	purine ribonucleotide metabolic process	126	18	15.15	0.25063	0.997823
GO:0001701	in utero embryonic development	165	23	19.84	0.25270	0.997823
GO:0006396	RNA processing	307	41	36.91	0.25330	0.997823
GO:0007178	transmembrane receptor protein serine/th...	111	16	13.34	0.25524	0.997823
GO:0070925	organelle assembly	236	32	28.37	0.25572	0.997823
GO:0002009	morphogenesis of an epithelium	181	25	21.76	0.25619	0.997823
GO:0051726	regulation of cell cycle	276	37	33.18	0.25899	0.997823
GO:0002698	negative regulation of immune effector p...	36	6	4.33	0.25975	0.997823
GO:0016458	gene silencing	36	6	4.33	0.25975	0.997823
GO:0035107	appendage morphogenesis	36	6	4.33	0.25975	0.997823
GO:0035108	limb morphogenesis	36	6	4.33	0.25975	0.997823
GO:0060759	regulation of response to cytokine stimu...	36	6	4.33	0.25975	0.997823
GO:0043009	chordate embryonic development	229	31	27.53	0.26313	0.997823
GO:0006942	regulation of striated muscle contractio...	29	5	3.49	0.26488	0.997823
GO:0007173	epidermal growth factor receptor signali...	29	5	3.49	0.26488	0.997823
GO:0014909	smooth muscle cell migration	29	5	3.49	0.26488	0.997823
GO:0032370	positive regulation of lipid transport	29	5	3.49	0.26488	0.997823
GO:1901224	positive regulation of NIK/NF-kappaB sig...	29	5	3.49	0.26488	0.997823
GO:0006937	regulation of muscle contraction	51	8	6.13	0.26517	0.997823
GO:0031623	receptor internalization	51	8	6.13	0.26517	0.997823
GO:0046474	glycerophospholipid biosynthetic process	51	8	6.13	0.26517	0.997823
GO:0048839	inner ear development	51	8	6.13	0.26517	0.997823
GO:1904375	regulation of protein localization to ce...	51	8	6.13	0.26517	0.997823
GO:0003170	heart valve development	15	3	1.8	0.26621	0.997823
GO:0007032	endosome organization	15	3	1.8	0.26621	0.997823
GO:0014044	Schwann cell development	15	3	1.8	0.26621	0.997823
GO:0014829	vascular associated smooth muscle contra...	15	3	1.8	0.26621	0.997823
GO:0016202	regulation of striated muscle tissue dev...	15	3	1.8	0.26621	0.997823
GO:0021761	limbic system development	15	3	1.8	0.26621	0.997823
GO:0031057	negative regulation of histone modificat...	15	3	1.8	0.26621	0.997823
GO:0031640	killing of cells of other organism	15	3	1.8	0.26621	0.997823
GO:0032965	regulation of collagen biosynthetic proc...	15	3	1.8	0.26621	0.997823
GO:0034113	heterotypic cell-cell adhesion	15	3	1.8	0.26621	0.997823
GO:0035272	exocrine system development	15	3	1.8	0.26621	0.997823
GO:0045682	regulation of epidermis development	15	3	1.8	0.26621	0.997823
GO:0046622	positive regulation of organ growth	15	3	1.8	0.26621	0.997823
GO:0046637	regulation of alpha-beta T cell differen...	15	3	1.8	0.26621	0.997823
GO:0060038	cardiac muscle cell proliferation	15	3	1.8	0.26621	0.997823
GO:0060632	regulation of microtubule-based movement	15	3	1.8	0.26621	0.997823
GO:0060675	ureteric bud morphogenesis	15	3	1.8	0.26621	0.997823
GO:0072171	mesonephric tubule morphogenesis	15	3	1.8	0.26621	0.997823
GO:0140354	lipid import into cell	15	3	1.8	0.26621	0.997823
GO:1903350	response to dopamine	15	3	1.8	0.26621	0.997823
GO:1903351	cellular response to dopamine	15	3	1.8	0.26621	0.997823
GO:2000649	regulation of sodium ion transmembrane t...	15	3	1.8	0.26621	0.997823
GO:0072521	purine-containing compound metabolic pro...	143	20	17.19	0.26671	0.997823
GO:0007492	endoderm development	22	4	2.64	0.26802	0.997823
GO:0016575	histone deacetylation	22	4	2.64	0.26802	0.997823
GO:0043967	histone H4 acetylation	22	4	2.64	0.26802	0.997823
GO:0045600	positive regulation of fat cell differen...	22	4	2.64	0.26802	0.997823
GO:0060389	pathway-restricted SMAD protein phosphor...	22	4	2.64	0.26802	0.997823
GO:0060415	muscle tissue morphogenesis	22	4	2.64	0.26802	0.997823
GO:1901655	cellular response to ketone	22	4	2.64	0.26802	0.997823
GO:1903115	regulation of actin filament-based movem...	22	4	2.64	0.26802	0.997823
GO:0060070	canonical Wnt signaling pathway	89	13	10.7	0.26811	0.997823
GO:0048736	appendage development	44	7	5.29	0.27318	0.997823
GO:0060173	limb development	44	7	5.29	0.27318	0.997823
GO:0061041	regulation of wound healing	44	7	5.29	0.27318	0.997823
GO:0001649	osteoblast differentiation	59	9	7.09	0.27406	0.997823
GO:0007219	Notch signaling pathway	59	9	7.09	0.27406	0.997823
GO:0031668	cellular response to extracellular stimu...	59	9	7.09	0.27406	0.997823
GO:0032102	negative regulation of response to exter...	105	15	12.62	0.27610	0.997823
GO:0070848	response to growth factor	199	27	23.92	0.27714	0.997823
GO:0045444	fat cell differentiation	82	12	9.86	0.27723	0.997823
GO:0050890	cognition	82	12	9.86	0.27723	0.997823
GO:0016051	carbohydrate biosynthetic process	67	10	8.05	0.28116	0.997823
GO:0008277	regulation of G protein-coupled receptor...	37	6	4.45	0.28128	0.997823
GO:0008637	apoptotic mitochondrial changes	37	6	4.45	0.28128	0.997823
GO:0030837	negative regulation of actin filament po...	37	6	4.45	0.28128	0.997823
GO:0022412	cellular process involved in reproductio...	90	13	10.82	0.28175	0.997823
GO:0032386	regulation of intracellular transport	121	17	14.55	0.28202	0.997823
GO:0008016	regulation of heart contraction	52	8	6.25	0.28326	0.997823
GO:0071322	cellular response to carbohydrate stimul...	52	8	6.25	0.28326	0.997823
GO:0099173	postsynapse organization	52	8	6.25	0.28326	0.997823
GO:2001236	regulation of extrinsic apoptotic signal...	52	8	6.25	0.28326	0.997823
GO:0097191	extrinsic apoptotic signaling pathway	75	11	9.02	0.28692	0.997823
GO:0009792	embryo development ending in birth or eg...	232	31	27.89	0.28871	0.997823
GO:0051656	establishment of organelle localization	106	15	12.74	0.28880	0.997823
GO:0003333	amino acid transmembrane transport	30	5	3.61	0.28920	0.997823
GO:0021987	cerebral cortex development	30	5	3.61	0.28920	0.997823
GO:0035601	protein deacylation	30	5	3.61	0.28920	0.997823
GO:0086003	cardiac muscle cell contraction	30	5	3.61	0.28920	0.997823
GO:0098732	macromolecule deacylation	30	5	3.61	0.28920	0.997823
GO:1901379	regulation of potassium ion transmembran...	30	5	3.61	0.28920	0.997823
GO:1903578	regulation of ATP metabolic process	30	5	3.61	0.28920	0.997823
GO:0046907	intracellular transport	457	59	54.94	0.29100	0.997823
GO:0002440	production of molecular mediator of immu...	60	9	7.21	0.29107	0.997823
GO:0007596	blood coagulation	60	9	7.21	0.29107	0.997823
GO:2000241	regulation of reproductive process	45	7	5.41	0.29297	0.997823
GO:0044770	cell cycle phase transition	122	17	14.67	0.29395	0.997823
GO:0002562	somatic diversification of immune recept...	23	4	2.77	0.29630	0.997823
GO:0002637	regulation of immunoglobulin production	23	4	2.77	0.29630	0.997823
GO:0006900	vesicle budding from membrane	23	4	2.77	0.29630	0.997823
GO:0015800	acidic amino acid transport	23	4	2.77	0.29630	0.997823
GO:0016444	somatic cell DNA recombination	23	4	2.77	0.29630	0.997823
GO:0019226	transmission of nerve impulse	23	4	2.77	0.29630	0.997823
GO:0045668	negative regulation of osteoblast differ...	23	4	2.77	0.29630	0.997823
GO:0045913	positive regulation of carbohydrate meta...	23	4	2.77	0.29630	0.997823
GO:0046128	purine ribonucleoside metabolic process	23	4	2.77	0.29630	0.997823
GO:0051494	negative regulation of cytoskeleton orga...	68	10	8.17	0.29726	0.997823
GO:0032970	regulation of actin filament-based proce...	154	21	18.51	0.30056	0.997823
GO:0001756	somitogenesis	16	3	1.92	0.30077	0.997823
GO:0001941	postsynaptic membrane organization	16	3	1.92	0.30077	0.997823
GO:0002204	somatic recombination of immunoglobulin ...	16	3	1.92	0.30077	0.997823
GO:0002208	somatic diversification of immunoglobuli...	16	3	1.92	0.30077	0.997823
GO:0002712	regulation of B cell mediated immunity	16	3	1.92	0.30077	0.997823
GO:0002889	regulation of immunoglobulin mediated im...	16	3	1.92	0.30077	0.997823
GO:0006024	glycosaminoglycan biosynthetic process	16	3	1.92	0.30077	0.997823
GO:0006890	retrograde vesicle-mediated transport, G...	16	3	1.92	0.30077	0.997823
GO:0010665	regulation of cardiac muscle cell apopto...	16	3	1.92	0.30077	0.997823
GO:0010799	regulation of peptidyl-threonine phospho...	16	3	1.92	0.30077	0.997823
GO:0014003	oligodendrocyte development	16	3	1.92	0.30077	0.997823
GO:0044380	protein localization to cytoskeleton	16	3	1.92	0.30077	0.997823
GO:0044818	mitotic G2/M transition checkpoint	16	3	1.92	0.30077	0.997823
GO:0045143	homologous chromosome segregation	16	3	1.92	0.30077	0.997823
GO:0045190	isotype switching	16	3	1.92	0.30077	0.997823
GO:0048634	regulation of muscle organ development	16	3	1.92	0.30077	0.997823
GO:0050931	pigment cell differentiation	16	3	1.92	0.30077	0.997823
GO:0050994	regulation of lipid catabolic process	16	3	1.92	0.30077	0.997823
GO:0060323	head morphogenesis	16	3	1.92	0.30077	0.997823
GO:0061077	chaperone-mediated protein folding	16	3	1.92	0.30077	0.997823
GO:0072078	nephron tubule morphogenesis	16	3	1.92	0.30077	0.997823
GO:0097549	chromatin organization involved in negat...	16	3	1.92	0.30077	0.997823
GO:1901861	regulation of muscle tissue development	16	3	1.92	0.30077	0.997823
GO:1901985	positive regulation of protein acetylati...	16	3	1.92	0.30077	0.997823
GO:1905515	non-motile cilium assembly	16	3	1.92	0.30077	0.997823
GO:2000514	regulation of CD4-positive, alpha-beta T...	16	3	1.92	0.30077	0.997823
GO:0006473	protein acetylation	53	8	6.37	0.30167	0.997823
GO:0031333	negative regulation of protein-containin...	53	8	6.37	0.30167	0.997823
GO:0000077	DNA damage checkpoint	38	6	4.57	0.30319	0.997823
GO:0000086	G2/M transition of mitotic cell cycle	38	6	4.57	0.30319	0.997823
GO:0046488	phosphatidylinositol metabolic process	38	6	4.57	0.30319	0.997823
GO:0019953	sexual reproduction	178	24	21.4	0.30345	0.997823
GO:0048232	male gamete generation	115	16	13.83	0.30404	0.997823
GO:0048609	multicellular organismal reproductive pr...	186	25	22.36	0.30413	0.997823
GO:1901293	nucleoside phosphate biosynthetic proces...	84	12	10.1	0.30630	0.997823
GO:0007599	hemostasis	61	9	7.33	0.30835	0.997823
GO:0050817	coagulation	61	9	7.33	0.30835	0.997823
GO:0051047	positive regulation of secretion	92	13	11.06	0.30965	0.997823
GO:0070371	ERK1 and ERK2 cascade	92	13	11.06	0.30965	0.997823
GO:1904951	positive regulation of establishment of ...	100	14	12.02	0.31242	0.997823
GO:0001824	blastocyst development	46	7	5.53	0.31306	0.997823
GO:0071333	cellular response to glucose stimulus	46	7	5.53	0.31306	0.997823
GO:0140013	meiotic nuclear division	46	7	5.53	0.31306	0.997823
GO:0007266	Rho protein signal transduction	69	10	8.3	0.31359	0.997823
GO:0001959	regulation of cytokine-mediated signalin...	31	5	3.73	0.31389	0.997823
GO:0007029	endoplasmic reticulum organization	31	5	3.73	0.31389	0.997823
GO:0008286	insulin receptor signaling pathway	31	5	3.73	0.31389	0.997823
GO:1904377	positive regulation of protein localizat...	31	5	3.73	0.31389	0.997823
GO:2001237	negative regulation of extrinsic apoptot...	31	5	3.73	0.31389	0.997823
GO:0071363	cellular response to growth factor stimu...	195	26	23.44	0.31444	0.997823
GO:0008284	positive regulation of cell population p...	275	36	33.06	0.31449	0.997823
GO:0051271	negative regulation of cellular componen...	108	15	12.98	0.31473	0.997823
GO:0061024	membrane organization	219	29	26.33	0.31507	0.997823
GO:0003002	regionalization	77	11	9.26	0.31776	0.997823
GO:0009259	ribonucleotide metabolic process	132	18	15.87	0.31960	0.997823
GO:0000075	cell cycle checkpoint	54	8	6.49	0.32033	0.997823
GO:0006479	protein methylation	54	8	6.49	0.32033	0.997823
GO:0008213	protein alkylation	54	8	6.49	0.32033	0.997823
GO:0032504	multicellular organism reproduction	188	25	22.6	0.32410	0.997823
GO:0051129	negative regulation of cellular componen...	220	29	26.45	0.32437	0.997823
GO:0001657	ureteric bud development	24	4	2.89	0.32491	0.997823
GO:0001823	mesonephros development	24	4	2.89	0.32491	0.997823
GO:0009119	ribonucleoside metabolic process	24	4	2.89	0.32491	0.997823
GO:0030512	negative regulation of transforming grow...	24	4	2.89	0.32491	0.997823
GO:0042278	purine nucleoside metabolic process	24	4	2.89	0.32491	0.997823
GO:0043473	pigmentation	24	4	2.89	0.32491	0.997823
GO:0046470	phosphatidylcholine metabolic process	24	4	2.89	0.32491	0.997823
GO:0060993	kidney morphogenesis	24	4	2.89	0.32491	0.997823
GO:0072163	mesonephric epithelium development	24	4	2.89	0.32491	0.997823
GO:0072164	mesonephric tubule development	24	4	2.89	0.32491	0.997823
GO:1902369	negative regulation of RNA catabolic pro...	24	4	2.89	0.32491	0.997823
GO:2000243	positive regulation of reproductive proc...	24	4	2.89	0.32491	0.997823
GO:0007093	mitotic cell cycle checkpoint	39	6	4.69	0.32539	0.997823
GO:0009913	epidermal cell differentiation	39	6	4.69	0.32539	0.997823
GO:0042157	lipoprotein metabolic process	39	6	4.69	0.32539	0.997823
GO:0071453	cellular response to oxygen levels	39	6	4.69	0.32539	0.997823
GO:0031348	negative regulation of defense response	62	9	7.45	0.32585	0.997823
GO:0050679	positive regulation of epithelial cell p...	62	9	7.45	0.32585	0.997823
GO:0022414	reproductive process	333	43	40.03	0.32744	0.997823
GO:0032880	regulation of protein localization	293	38	35.22	0.33023	0.997823
GO:0048568	embryonic organ development	133	18	15.99	0.33160	0.997823
GO:0050673	epithelial cell proliferation	133	18	15.99	0.33160	0.997823
GO:0043254	regulation of protein-containing complex...	141	19	16.95	0.33238	0.997823
GO:0071326	cellular response to monosaccharide stim...	47	7	5.65	0.33339	0.997823
GO:0071331	cellular response to hexose stimulus	47	7	5.65	0.33339	0.997823
GO:0090066	regulation of anatomical structure size	189	25	22.72	0.33422	0.997823
GO:0000003	reproduction	334	43	40.15	0.33516	0.997823
GO:0001947	heart looping	17	3	2.04	0.33553	0.997823
GO:0010659	cardiac muscle cell apoptotic process	17	3	2.04	0.33553	0.997823
GO:0010662	regulation of striated muscle cell apopt...	17	3	2.04	0.33553	0.997823
GO:0031124	mRNA 3'-end processing	17	3	2.04	0.33553	0.997823
GO:0034381	plasma lipoprotein particle clearance	17	3	2.04	0.33553	0.997823
GO:0042311	vasodilation	17	3	2.04	0.33553	0.997823
GO:0044088	regulation of vacuole organization	17	3	2.04	0.33553	0.997823
GO:0048013	ephrin receptor signaling pathway	17	3	2.04	0.33553	0.997823
GO:0048066	developmental pigmentation	17	3	2.04	0.33553	0.997823
GO:0050982	detection of mechanical stimulus	17	3	2.04	0.33553	0.997823
GO:0061053	somite development	17	3	2.04	0.33553	0.997823
GO:0061371	determination of heart left/right asymme...	17	3	2.04	0.33553	0.997823
GO:0061384	heart trabecula morphogenesis	17	3	2.04	0.33553	0.997823
GO:0070192	chromosome organization involved in meio...	17	3	2.04	0.33553	0.997823
GO:0089718	amino acid import across plasma membrane	17	3	2.04	0.33553	0.997823
GO:1903307	positive regulation of regulated secreto...	17	3	2.04	0.33553	0.997823
GO:1905268	negative regulation of chromatin organiz...	17	3	2.04	0.33553	0.997823
GO:0006364	rRNA processing	86	12	10.34	0.33612	0.997823
GO:0060341	regulation of cellular localization	294	38	35.34	0.33845	0.997823
GO:0032963	collagen metabolic process	32	5	3.85	0.33885	0.997823
GO:0038127	ERBB signaling pathway	32	5	3.85	0.33885	0.997823
GO:0042472	inner ear morphogenesis	32	5	3.85	0.33885	0.997823
GO:0009887	animal organ morphogenesis	286	37	34.38	0.33907	0.997823
GO:0035150	regulation of tube size	55	8	6.61	0.33920	0.997823
GO:0035296	regulation of tube diameter	55	8	6.61	0.33920	0.997823
GO:0097746	blood vessel diameter maintenance	55	8	6.61	0.33920	0.997823
GO:0000245	spliceosomal complex assembly	10	2	1.2	0.34260	0.997823
GO:0001682	tRNA 5'-leader removal	10	2	1.2	0.34260	0.997823
GO:0001953	negative regulation of cell-matrix adhes...	10	2	1.2	0.34260	0.997823
GO:0002043	blood vessel endothelial cell proliferat...	10	2	1.2	0.34260	0.997823
GO:0002369	T cell cytokine production	10	2	1.2	0.34260	0.997823
GO:0006264	mitochondrial DNA replication	10	2	1.2	0.34260	0.997823
GO:0006744	ubiquinone biosynthetic process	10	2	1.2	0.34260	0.997823
GO:0007062	sister chromatid cohesion	10	2	1.2	0.34260	0.997823
GO:0009593	detection of chemical stimulus	10	2	1.2	0.34260	0.997823
GO:0009595	detection of biotic stimulus	10	2	1.2	0.34260	0.997823
GO:0010664	negative regulation of striated muscle c...	10	2	1.2	0.34260	0.997823
GO:0010763	positive regulation of fibroblast migrat...	10	2	1.2	0.34260	0.997823
GO:0010971	positive regulation of G2/M transition o...	10	2	1.2	0.34260	0.997823
GO:0019068	virion assembly	10	2	1.2	0.34260	0.997823
GO:0021587	cerebellum morphogenesis	10	2	1.2	0.34260	0.997823
GO:0021591	ventricular system development	10	2	1.2	0.34260	0.997823
GO:0030521	androgen receptor signaling pathway	10	2	1.2	0.34260	0.997823
GO:0031062	positive regulation of histone methylati...	10	2	1.2	0.34260	0.997823
GO:0031294	lymphocyte costimulation	10	2	1.2	0.34260	0.997823
GO:0032770	positive regulation of monooxygenase act...	10	2	1.2	0.34260	0.997823
GO:0033598	mammary gland epithelial cell proliferat...	10	2	1.2	0.34260	0.997823
GO:0035019	somatic stem cell population maintenance	10	2	1.2	0.34260	0.997823
GO:0035024	negative regulation of Rho protein signa...	10	2	1.2	0.34260	0.997823
GO:0035307	positive regulation of protein dephospho...	10	2	1.2	0.34260	0.997823
GO:0040037	negative regulation of fibroblast growth...	10	2	1.2	0.34260	0.997823
GO:0042908	xenobiotic transport	10	2	1.2	0.34260	0.997823
GO:0045814	negative regulation of gene expression, ...	10	2	1.2	0.34260	0.997823
GO:0045830	positive regulation of isotype switching	10	2	1.2	0.34260	0.997823
GO:0045932	negative regulation of muscle contractio...	10	2	1.2	0.34260	0.997823
GO:0045981	positive regulation of nucleotide metabo...	10	2	1.2	0.34260	0.997823
GO:0046686	response to cadmium ion	10	2	1.2	0.34260	0.997823
GO:0046717	acid secretion	10	2	1.2	0.34260	0.997823
GO:0051220	cytoplasmic sequestering of protein	10	2	1.2	0.34260	0.997823
GO:0051354	negative regulation of oxidoreductase ac...	10	2	1.2	0.34260	0.997823
GO:0060306	regulation of membrane repolarization	10	2	1.2	0.34260	0.997823
GO:0060317	cardiac epithelial to mesenchymal transi...	10	2	1.2	0.34260	0.997823
GO:0060669	embryonic placenta morphogenesis	10	2	1.2	0.34260	0.997823
GO:0061339	establishment or maintenance of monopola...	10	2	1.2	0.34260	0.997823
GO:0090114	COPII-coated vesicle budding	10	2	1.2	0.34260	0.997823
GO:0099622	cardiac muscle cell membrane repolarizat...	10	2	1.2	0.34260	0.997823
GO:1900544	positive regulation of purine nucleotide...	10	2	1.2	0.34260	0.997823
GO:1901663	quinone biosynthetic process	10	2	1.2	0.34260	0.997823
GO:1902229	regulation of intrinsic apoptotic signal...	10	2	1.2	0.34260	0.997823
GO:1902751	positive regulation of cell cycle G2/M p...	10	2	1.2	0.34260	0.997823
GO:1903580	positive regulation of ATP metabolic pro...	10	2	1.2	0.34260	0.997823
GO:1904030	negative regulation of cyclin-dependent ...	10	2	1.2	0.34260	0.997823
GO:1905207	regulation of cardiocyte differentiation	10	2	1.2	0.34260	0.997823
GO:2000352	negative regulation of endothelial cell ...	10	2	1.2	0.34260	0.997823
GO:0007411	axon guidance	63	9	7.57	0.34353	0.997823
GO:0097485	neuron projection guidance	63	9	7.57	0.34353	0.997823
GO:0006163	purine nucleotide metabolic process	134	18	16.11	0.34371	0.997823
GO:0032535	regulation of cellular component size	142	19	17.07	0.34416	0.997823
GO:0030833	regulation of actin filament polymerizat...	71	10	8.54	0.34682	0.997823
GO:0140014	mitotic nuclear division	79	11	9.5	0.34933	0.997823
GO:0009790	embryo development	344	44	41.35	0.34988	0.997823
GO:0000271	polysaccharide biosynthetic process	25	4	3.01	0.35369	0.997823
GO:0002200	somatic diversification of immune recept...	25	4	3.01	0.35369	0.997823
GO:0031047	gene silencing by RNA	25	4	3.01	0.35369	0.997823
GO:0034394	protein localization to cell surface	25	4	3.01	0.35369	0.997823
GO:0035050	embryonic heart tube development	25	4	3.01	0.35369	0.997823
GO:0035710	CD4-positive, alpha-beta T cell activati...	25	4	3.01	0.35369	0.997823
GO:0044773	mitotic DNA damage checkpoint	25	4	3.01	0.35369	0.997823
GO:0045132	meiotic chromosome segregation	25	4	3.01	0.35369	0.997823
GO:0045685	regulation of glial cell differentiation	25	4	3.01	0.35369	0.997823
GO:0048644	muscle organ morphogenesis	25	4	3.01	0.35369	0.997823
GO:0048706	embryonic skeletal system development	25	4	3.01	0.35369	0.997823
GO:0048747	muscle fiber development	25	4	3.01	0.35369	0.997823
GO:1901983	regulation of protein acetylation	25	4	3.01	0.35369	0.997823
GO:1903510	mucopolysaccharide metabolic process	25	4	3.01	0.35369	0.997823
GO:0030509	BMP signaling pathway	48	7	5.77	0.35391	0.997823
GO:0045598	regulation of fat cell differentiation	48	7	5.77	0.35391	0.997823
GO:1901991	negative regulation of mitotic cell cycl...	48	7	5.77	0.35391	0.997823
GO:0010639	negative regulation of organelle organiz...	111	15	13.34	0.35468	0.997823
GO:0000280	nuclear division	119	16	14.31	0.35528	0.997823
GO:0007272	ensheathment of neurons	56	8	6.73	0.35824	0.997823
GO:0007568	aging	56	8	6.73	0.35824	0.997823
GO:0008217	regulation of blood pressure	56	8	6.73	0.35824	0.997823
GO:0008366	axon ensheathment	56	8	6.73	0.35824	0.997823
GO:0042552	myelination	56	8	6.73	0.35824	0.997823
GO:0045165	cell fate commitment	56	8	6.73	0.35824	0.997823
GO:0043281	regulation of cysteine-type endopeptidas...	64	9	7.69	0.36136	0.997823
GO:0006886	intracellular protein transport	305	39	36.67	0.36250	0.997823
GO:0002460	adaptive immune response based on somati...	72	10	8.66	0.36364	0.997823
GO:0043112	receptor metabolic process	72	10	8.66	0.36364	0.997823
GO:0007422	peripheral nervous system development	33	5	3.97	0.36394	0.997823
GO:0030183	B cell differentiation	33	5	3.97	0.36394	0.997823
GO:0048145	regulation of fibroblast proliferation	33	5	3.97	0.36394	0.997823
GO:0070509	calcium ion import	33	5	3.97	0.36394	0.997823
GO:1904035	regulation of epithelial cell apoptotic ...	33	5	3.97	0.36394	0.997823
GO:0000375	RNA splicing, via transesterification re...	88	12	10.58	0.36650	0.997823
GO:0000377	RNA splicing, via transesterification re...	88	12	10.58	0.36650	0.997823
GO:0000398	mRNA splicing, via spliceosome	88	12	10.58	0.36650	0.997823
GO:0016072	rRNA metabolic process	88	12	10.58	0.36650	0.997823
GO:0007389	pattern specification process	104	14	12.5	0.36789	0.997823
GO:0044772	mitotic cell cycle phase transition	112	15	13.46	0.36821	0.997823
GO:0006367	transcription initiation from RNA polyme...	18	3	2.16	0.37019	0.997823
GO:0010656	negative regulation of muscle cell apopt...	18	3	2.16	0.37019	0.997823
GO:0010658	striated muscle cell apoptotic process	18	3	2.16	0.37019	0.997823
GO:0010883	regulation of lipid storage	18	3	2.16	0.37019	0.997823
GO:0014855	striated muscle cell proliferation	18	3	2.16	0.37019	0.997823
GO:0030850	prostate gland development	18	3	2.16	0.37019	0.997823
GO:0032371	regulation of sterol transport	18	3	2.16	0.37019	0.997823
GO:0032374	regulation of cholesterol transport	18	3	2.16	0.37019	0.997823
GO:0043367	CD4-positive, alpha-beta T cell differen...	18	3	2.16	0.37019	0.997823
GO:0051591	response to cAMP	18	3	2.16	0.37019	0.997823
GO:0061844	antimicrobial humoral immune response me...	18	3	2.16	0.37019	0.997823
GO:0062125	regulation of mitochondrial gene express...	18	3	2.16	0.37019	0.997823
GO:0071867	response to monoamine	18	3	2.16	0.37019	0.997823
GO:0071868	cellular response to monoamine stimulus	18	3	2.16	0.37019	0.997823
GO:0071869	response to catecholamine	18	3	2.16	0.37019	0.997823
GO:0071870	cellular response to catecholamine stimu...	18	3	2.16	0.37019	0.997823
GO:0072028	nephron morphogenesis	18	3	2.16	0.37019	0.997823
GO:0072088	nephron epithelium morphogenesis	18	3	2.16	0.37019	0.997823
GO:0072523	purine-containing compound catabolic pro...	18	3	2.16	0.37019	0.997823
GO:0090279	regulation of calcium ion import	18	3	2.16	0.37019	0.997823
GO:2001021	negative regulation of response to DNA d...	18	3	2.16	0.37019	0.997823
GO:0016525	negative regulation of angiogenesis	41	6	4.93	0.37034	0.997823
GO:0032272	negative regulation of protein polymeriz...	41	6	4.93	0.37034	0.997823
GO:0034766	negative regulation of ion transmembrane...	41	6	4.93	0.37034	0.997823
GO:1904019	epithelial cell apoptotic process	41	6	4.93	0.37034	0.997823
GO:2000181	negative regulation of blood vessel morp...	41	6	4.93	0.37034	0.997823
GO:0001525	angiogenesis	217	28	26.09	0.37287	0.997823
GO:0044087	regulation of cellular component biogene...	282	36	33.9	0.37407	0.997823
GO:0045807	positive regulation of endocytosis	49	7	5.89	0.37454	0.997823
GO:1900180	regulation of protein localization to nu...	49	7	5.89	0.37454	0.997823
GO:0007626	locomotory behavior	57	8	6.85	0.37738	0.997823
GO:0048015	phosphatidylinositol-mediated signaling	57	8	6.85	0.37738	0.997823
GO:0048017	inositol lipid-mediated signaling	57	8	6.85	0.37738	0.997823
GO:0009611	response to wounding	153	20	18.39	0.37934	0.997823
GO:0019693	ribose phosphate metabolic process	137	18	16.47	0.38057	0.997823
GO:0009165	nucleotide biosynthetic process	81	11	9.74	0.38138	0.997823
GO:0019318	hexose metabolic process	81	11	9.74	0.38138	0.997823
GO:0031098	stress-activated protein kinase signalin...	81	11	9.74	0.38138	0.997823
GO:0033157	regulation of intracellular protein tran...	81	11	9.74	0.38138	0.997823
GO:0006650	glycerophospholipid metabolic process	89	12	10.7	0.38184	0.997823
GO:0032271	regulation of protein polymerization	89	12	10.7	0.38184	0.997823
GO:0051222	positive regulation of protein transport	97	13	11.66	0.38203	0.997823
GO:0072593	reactive oxygen species metabolic proces...	97	13	11.66	0.38203	0.997823
GO:0006476	protein deacetylation	26	4	3.13	0.38246	0.997823
GO:0009791	post-embryonic development	26	4	3.13	0.38246	0.997823
GO:0019882	antigen processing and presentation	26	4	3.13	0.38246	0.997823
GO:0030193	regulation of blood coagulation	26	4	3.13	0.38246	0.997823
GO:0032890	regulation of organic acid transport	26	4	3.13	0.38246	0.997823
GO:0034754	cellular hormone metabolic process	26	4	3.13	0.38246	0.997823
GO:0051899	membrane depolarization	26	4	3.13	0.38246	0.997823
GO:0051963	regulation of synapse assembly	26	4	3.13	0.38246	0.997823
GO:0048729	tissue morphogenesis	202	26	24.28	0.38490	0.997823
GO:0003009	skeletal muscle contraction	11	2	1.32	0.38830	0.997823
GO:0006305	DNA alkylation	11	2	1.32	0.38830	0.997823
GO:0006306	DNA methylation	11	2	1.32	0.38830	0.997823
GO:0006743	ubiquinone metabolic process	11	2	1.32	0.38830	0.997823
GO:0006826	iron ion transport	11	2	1.32	0.38830	0.997823
GO:0007019	microtubule depolymerization	11	2	1.32	0.38830	0.997823
GO:0007212	dopamine receptor signaling pathway	11	2	1.32	0.38830	0.997823
GO:0008207	C21-steroid hormone metabolic process	11	2	1.32	0.38830	0.997823
GO:0009187	cyclic nucleotide metabolic process	11	2	1.32	0.38830	0.997823
GO:0014014	negative regulation of gliogenesis	11	2	1.32	0.38830	0.997823
GO:0016126	sterol biosynthetic process	11	2	1.32	0.38830	0.997823
GO:0019228	neuronal action potential	11	2	1.32	0.38830	0.997823
GO:0019320	hexose catabolic process	11	2	1.32	0.38830	0.997823
GO:0019432	triglyceride biosynthetic process	11	2	1.32	0.38830	0.997823
GO:0021575	hindbrain morphogenesis	11	2	1.32	0.38830	0.997823
GO:0022617	extracellular matrix disassembly	11	2	1.32	0.38830	0.997823
GO:0030858	positive regulation of epithelial cell d...	11	2	1.32	0.38830	0.997823
GO:0031112	positive regulation of microtubule polym...	11	2	1.32	0.38830	0.997823
GO:0031116	positive regulation of microtubule polym...	11	2	1.32	0.38830	0.997823
GO:0031663	lipopolysaccharide-mediated signaling pa...	11	2	1.32	0.38830	0.997823
GO:0032288	myelin assembly	11	2	1.32	0.38830	0.997823
GO:0032928	regulation of superoxide anion generatio...	11	2	1.32	0.38830	0.997823
GO:0034367	protein-containing complex remodeling	11	2	1.32	0.38830	0.997823
GO:0034383	low-density lipoprotein particle clearan...	11	2	1.32	0.38830	0.997823
GO:0036303	lymph vessel morphogenesis	11	2	1.32	0.38830	0.997823
GO:0043276	anoikis	11	2	1.32	0.38830	0.997823
GO:0045581	negative regulation of T cell differenti...	11	2	1.32	0.38830	0.997823
GO:0045589	regulation of regulatory T cell differen...	11	2	1.32	0.38830	0.997823
GO:0045806	negative regulation of endocytosis	11	2	1.32	0.38830	0.997823
GO:0045880	positive regulation of smoothened signal...	11	2	1.32	0.38830	0.997823
GO:0045995	regulation of embryonic development	11	2	1.32	0.38830	0.997823
GO:0046320	regulation of fatty acid oxidation	11	2	1.32	0.38830	0.997823
GO:0046365	monosaccharide catabolic process	11	2	1.32	0.38830	0.997823
GO:0048026	positive regulation of mRNA splicing, vi...	11	2	1.32	0.38830	0.997823
GO:0048710	regulation of astrocyte differentiation	11	2	1.32	0.38830	0.997823
GO:0048854	brain morphogenesis	11	2	1.32	0.38830	0.997823
GO:0051014	actin filament severing	11	2	1.32	0.38830	0.997823
GO:0051180	vitamin transport	11	2	1.32	0.38830	0.997823
GO:0060338	regulation of type I interferon-mediated...	11	2	1.32	0.38830	0.997823
GO:0090311	regulation of protein deacetylation	11	2	1.32	0.38830	0.997823
GO:0099116	tRNA 5'-end processing	11	2	1.32	0.38830	0.997823
GO:0110110	positive regulation of animal organ morp...	11	2	1.32	0.38830	0.997823
GO:2000279	negative regulation of DNA biosynthetic ...	11	2	1.32	0.38830	0.997823
GO:0003279	cardiac septum development	34	5	4.09	0.38907	0.997823
GO:0006022	aminoglycan metabolic process	34	5	4.09	0.38907	0.997823
GO:0014812	muscle cell migration	34	5	4.09	0.38907	0.997823
GO:0048144	fibroblast proliferation	34	5	4.09	0.38907	0.997823
GO:0050852	T cell receptor signaling pathway	34	5	4.09	0.38907	0.997823
GO:0070646	protein modification by small protein re...	34	5	4.09	0.38907	0.997823
GO:0031570	DNA integrity checkpoint	42	6	5.05	0.39293	0.997823
GO:0034763	negative regulation of transmembrane tra...	42	6	5.05	0.39293	0.997823
GO:1901343	negative regulation of vasculature devel...	42	6	5.05	0.39293	0.997823
GO:1905477	positive regulation of protein localizat...	42	6	5.05	0.39293	0.997823
GO:1905954	positive regulation of lipid localizatio...	42	6	5.05	0.39293	0.997823
GO:0010629	negative regulation of gene expression	268	34	32.22	0.39423	0.997823
GO:0198738	cell-cell signaling by wnt	122	16	14.67	0.39473	0.997823
GO:0001678	cellular glucose homeostasis	50	7	6.01	0.39524	0.997823
GO:0007188	adenylate cyclase-modulating G protein-c...	50	7	6.01	0.39524	0.997823
GO:0006469	negative regulation of protein kinase ac...	58	8	6.97	0.39658	0.997823
GO:0009743	response to carbohydrate	58	8	6.97	0.39658	0.997823
GO:0043583	ear development	58	8	6.97	0.39658	0.997823
GO:1901888	regulation of cell junction assembly	58	8	6.97	0.39658	0.997823
GO:1903034	regulation of response to wounding	58	8	6.97	0.39658	0.997823
GO:0045664	regulation of neuron differentiation	66	9	7.93	0.39729	0.997823
GO:0060271	cilium assembly	82	11	9.86	0.39751	0.997823
GO:0002088	lens development in camera-type eye	19	3	2.28	0.40451	0.997823
GO:0007631	feeding behavior	19	3	2.28	0.40451	0.997823
GO:0032479	regulation of type I interferon producti...	19	3	2.28	0.40451	0.997823
GO:0032964	collagen biosynthetic process	19	3	2.28	0.40451	0.997823
GO:0034308	primary alcohol metabolic process	19	3	2.28	0.40451	0.997823
GO:0034340	response to type I interferon	19	3	2.28	0.40451	0.997823
GO:0042058	regulation of epidermal growth factor re...	19	3	2.28	0.40451	0.997823
GO:0045599	negative regulation of fat cell differen...	19	3	2.28	0.40451	0.997823
GO:0045661	regulation of myoblast differentiation	19	3	2.28	0.40451	0.997823
GO:0045824	negative regulation of innate immune res...	19	3	2.28	0.40451	0.997823
GO:0046676	negative regulation of insulin secretion	19	3	2.28	0.40451	0.997823
GO:0051384	response to glucocorticoid	19	3	2.28	0.40451	0.997823
GO:0060760	positive regulation of response to cytok...	19	3	2.28	0.40451	0.997823
GO:0086002	cardiac muscle cell action potential inv...	19	3	2.28	0.40451	0.997823
GO:0048285	organelle fission	139	18	16.71	0.40547	0.997823
GO:1902903	regulation of supramolecular fiber organ...	139	18	16.71	0.40547	0.997823
GO:0032956	regulation of actin cytoskeleton organiz...	131	17	15.75	0.40674	0.997823
GO:0042326	negative regulation of phosphorylation	115	15	13.83	0.40922	0.997823
GO:0032259	methylation	107	14	12.86	0.41042	0.997823
GO:0000956	nuclear-transcribed mRNA catabolic proce...	27	4	3.25	0.41109	0.997823
GO:0006835	dicarboxylic acid transport	27	4	3.25	0.41109	0.997823
GO:0007569	cell aging	27	4	3.25	0.41109	0.997823
GO:0044344	cellular response to fibroblast growth f...	27	4	3.25	0.41109	0.997823
GO:0044774	mitotic DNA integrity checkpoint	27	4	3.25	0.41109	0.997823
GO:0055117	regulation of cardiac muscle contraction	27	4	3.25	0.41109	0.997823
GO:0071774	response to fibroblast growth factor	27	4	3.25	0.41109	0.997823
GO:0090501	RNA phosphodiester bond hydrolysis	27	4	3.25	0.41109	0.997823
GO:1900046	regulation of hemostasis	27	4	3.25	0.41109	0.997823
GO:0007156	homophilic cell adhesion via plasma memb...	35	5	4.21	0.41414	0.997823
GO:0010469	regulation of signaling receptor activit...	35	5	4.21	0.41414	0.997823
GO:0033138	positive regulation of peptidyl-serine p...	35	5	4.21	0.41414	0.997823
GO:0043297	apical junction assembly	35	5	4.21	0.41414	0.997823
GO:0048593	camera-type eye morphogenesis	35	5	4.21	0.41414	0.997823
GO:0043393	regulation of protein binding	75	10	9.02	0.41458	0.997823
GO:0051348	negative regulation of transferase activ...	75	10	9.02	0.41458	0.997823
GO:0008544	epidermis development	67	9	8.05	0.41531	0.997823
GO:0015931	nucleobase-containing compound transport	67	9	8.05	0.41531	0.997823
GO:0045766	positive regulation of angiogenesis	67	9	8.05	0.41531	0.997823
GO:1904018	positive regulation of vasculature devel...	67	9	8.05	0.41531	0.997823
GO:0001508	action potential	43	6	5.17	0.41550	0.997823
GO:0001889	liver development	43	6	5.17	0.41550	0.997823
GO:0006888	endoplasmic reticulum to Golgi vesicle-m...	43	6	5.17	0.41550	0.997823
GO:0045667	regulation of osteoblast differentiation	43	6	5.17	0.41550	0.997823
GO:0061008	hepaticobiliary system development	43	6	5.17	0.41550	0.997823
GO:0006941	striated muscle contraction	59	8	7.09	0.41580	0.997823
GO:1903793	positive regulation of anion transport	148	19	17.79	0.41635	0.997823
GO:0044265	cellular macromolecule catabolic process	279	35	33.54	0.41973	0.997823
GO:0050678	regulation of epithelial cell proliferat...	116	15	13.95	0.42297	0.997823
GO:0048598	embryonic morphogenesis	165	21	19.84	0.42474	0.997823
GO:0009057	macromolecule catabolic process	346	43	41.6	0.43112	0.997823
GO:0008064	regulation of actin polymerization or de...	76	10	9.14	0.43160	0.997823
GO:0030832	regulation of actin filament length	76	10	9.14	0.43160	0.997823
GO:0051403	stress-activated MAPK cascade	76	10	9.14	0.43160	0.997823
GO:1901137	carbohydrate derivative biosynthetic pro...	182	23	21.88	0.43218	0.997823
GO:0001658	branching involved in ureteric bud morph...	12	2	1.44	0.43253	0.997823
GO:0002686	negative regulation of leukocyte migrati...	12	2	1.44	0.43253	0.997823
GO:0006656	phosphatidylcholine biosynthetic process	12	2	1.44	0.43253	0.997823
GO:0007616	long-term memory	12	2	1.44	0.43253	0.997823
GO:0009948	anterior/posterior axis specification	12	2	1.44	0.43253	0.997823
GO:0030225	macrophage differentiation	12	2	1.44	0.43253	0.997823
GO:0030808	regulation of nucleotide biosynthetic pr...	12	2	1.44	0.43253	0.997823
GO:0032206	positive regulation of telomere maintena...	12	2	1.44	0.43253	0.997823
GO:0032801	receptor catabolic process	12	2	1.44	0.43253	0.997823
GO:0034471	ncRNA 5'-end processing	12	2	1.44	0.43253	0.997823
GO:0043267	negative regulation of potassium ion tra...	12	2	1.44	0.43253	0.997823
GO:0043616	keratinocyte proliferation	12	2	1.44	0.43253	0.997823
GO:0044060	regulation of endocrine process	12	2	1.44	0.43253	0.997823
GO:0045066	regulatory T cell differentiation	12	2	1.44	0.43253	0.997823
GO:0045494	photoreceptor cell maintenance	12	2	1.44	0.43253	0.997823
GO:0045840	positive regulation of mitotic nuclear d...	12	2	1.44	0.43253	0.997823
GO:0046825	regulation of protein export from nucleu...	12	2	1.44	0.43253	0.997823
GO:0046839	phospholipid dephosphorylation	12	2	1.44	0.43253	0.997823
GO:0046854	phosphatidylinositol phosphorylation	12	2	1.44	0.43253	0.997823
GO:0046931	pore complex assembly	12	2	1.44	0.43253	0.997823
GO:0048002	antigen processing and presentation of p...	12	2	1.44	0.43253	0.997823
GO:0048332	mesoderm morphogenesis	12	2	1.44	0.43253	0.997823
GO:0050685	positive regulation of mRNA processing	12	2	1.44	0.43253	0.997823
GO:0050798	activated T cell proliferation	12	2	1.44	0.43253	0.997823
GO:0051568	histone H3-K4 methylation	12	2	1.44	0.43253	0.997823
GO:0051972	regulation of telomerase activity	12	2	1.44	0.43253	0.997823
GO:0060122	inner ear receptor cell stereocilium org...	12	2	1.44	0.43253	0.997823
GO:0061082	myeloid leukocyte cytokine production	12	2	1.44	0.43253	0.997823
GO:0086010	membrane depolarization during action po...	12	2	1.44	0.43253	0.997823
GO:0090322	regulation of superoxide metabolic proce...	12	2	1.44	0.43253	0.997823
GO:0097194	execution phase of apoptosis	12	2	1.44	0.43253	0.997823
GO:0150076	neuroinflammatory response	12	2	1.44	0.43253	0.997823
GO:1900371	regulation of purine nucleotide biosynth...	12	2	1.44	0.43253	0.997823
GO:1903077	negative regulation of protein localizat...	12	2	1.44	0.43253	0.997823
GO:1904031	positive regulation of cyclin-dependent ...	12	2	1.44	0.43253	0.997823
GO:1905710	positive regulation of membrane permeabi...	12	2	1.44	0.43253	0.997823
GO:2000810	regulation of bicellular tight junction ...	12	2	1.44	0.43253	0.997823
GO:0033673	negative regulation of kinase activity	68	9	8.17	0.43332	0.997823
GO:0060429	epithelium development	330	41	39.67	0.43481	0.997823
GO:0051301	cell division	166	21	19.96	0.43633	0.997823
GO:0009749	response to glucose	52	7	6.25	0.43656	0.997823
GO:0045446	endothelial cell differentiation	52	7	6.25	0.43656	0.997823
GO:0071772	response to BMP	52	7	6.25	0.43656	0.997823
GO:0071773	cellular response to BMP stimulus	52	7	6.25	0.43656	0.997823
GO:0002793	positive regulation of peptide secretion	44	6	5.29	0.43797	0.997823
GO:0043280	positive regulation of cysteine-type end...	44	6	5.29	0.43797	0.997823
GO:0001836	release of cytochrome c from mitochondri...	20	3	2.4	0.43826	0.997823
GO:0003143	embryonic heart tube morphogenesis	20	3	2.4	0.43826	0.997823
GO:0006081	cellular aldehyde metabolic process	20	3	2.4	0.43826	0.997823
GO:0009064	glutamine family amino acid metabolic pr...	20	3	2.4	0.43826	0.997823
GO:0009247	glycolipid biosynthetic process	20	3	2.4	0.43826	0.997823
GO:0014037	Schwann cell differentiation	20	3	2.4	0.43826	0.997823
GO:0019933	cAMP-mediated signaling	20	3	2.4	0.43826	0.997823
GO:0030968	endoplasmic reticulum unfolded protein r...	20	3	2.4	0.43826	0.997823
GO:0031960	response to corticosteroid	20	3	2.4	0.43826	0.997823
GO:0032456	endocytic recycling	20	3	2.4	0.43826	0.997823
GO:0032606	type I interferon production	20	3	2.4	0.43826	0.997823
GO:0042490	mechanoreceptor differentiation	20	3	2.4	0.43826	0.997823
GO:0048704	embryonic skeletal system morphogenesis	20	3	2.4	0.43826	0.997823
GO:0050830	defense response to Gram-positive bacter...	20	3	2.4	0.43826	0.997823
GO:0061512	protein localization to cilium	20	3	2.4	0.43826	0.997823
GO:0085029	extracellular matrix assembly	20	3	2.4	0.43826	0.997823
GO:1902475	L-alpha-amino acid transmembrane transpo...	20	3	2.4	0.43826	0.997823
GO:1902807	negative regulation of cell cycle G1/S p...	20	3	2.4	0.43826	0.997823
GO:1990868	response to chemokine	20	3	2.4	0.43826	0.997823
GO:1990869	cellular response to chemokine	20	3	2.4	0.43826	0.997823
GO:2000300	regulation of synaptic vesicle exocytosi...	20	3	2.4	0.43826	0.997823
GO:0045765	regulation of angiogenesis	109	14	13.1	0.43893	0.997823
GO:0021543	pallium development	36	5	4.33	0.43904	0.997823
GO:0021953	central nervous system neuron differenti...	36	5	4.33	0.43904	0.997823
GO:0042471	ear morphogenesis	36	5	4.33	0.43904	0.997823
GO:0043266	regulation of potassium ion transport	36	5	4.33	0.43904	0.997823
GO:0097305	response to alcohol	36	5	4.33	0.43904	0.997823
GO:2000379	positive regulation of reactive oxygen s...	36	5	4.33	0.43904	0.997823
GO:0019935	cyclic-nucleotide-mediated signaling	28	4	3.37	0.43943	0.997823
GO:0030203	glycosaminoglycan metabolic process	28	4	3.37	0.43943	0.997823
GO:0043648	dicarboxylic acid metabolic process	28	4	3.37	0.43943	0.997823
GO:0048708	astrocyte differentiation	28	4	3.37	0.43943	0.997823
GO:0050709	negative regulation of protein secretion	28	4	3.37	0.43943	0.997823
GO:0050818	regulation of coagulation	28	4	3.37	0.43943	0.997823
GO:0006511	ubiquitin-dependent protein catabolic pr...	150	19	18.03	0.44073	0.997823
GO:0007423	sensory organ development	150	19	18.03	0.44073	0.997823
GO:0001654	eye development	101	13	12.14	0.44121	0.997823
GO:0044782	cilium organization	93	12	11.18	0.44357	0.997823
GO:0001501	skeletal system development	134	17	16.11	0.44542	0.997823
GO:0005996	monosaccharide metabolic process	85	11	10.22	0.44603	0.997823
GO:0090150	establishment of protein localization to...	85	11	10.22	0.44603	0.997823
GO:0030041	actin filament polymerization	77	10	9.26	0.44859	0.997823
GO:0007409	axonogenesis	118	15	14.19	0.45048	0.997823
GO:0046486	glycerolipid metabolic process	118	15	14.19	0.45048	0.997823
GO:0006006	glucose metabolic process	69	9	8.3	0.45128	0.997823
GO:0060047	heart contraction	69	9	8.3	0.45128	0.997823
GO:1902905	positive regulation of supramolecular fi...	69	9	8.3	0.45128	0.997823
GO:2000377	regulation of reactive oxygen species me...	69	9	8.3	0.45128	0.997823
GO:2001234	negative regulation of apoptotic signali...	69	9	8.3	0.45128	0.997823
GO:0055074	calcium ion homeostasis	151	19	18.15	0.45292	0.997823
GO:0048880	sensory system development	102	13	12.26	0.45601	0.997823
GO:0150063	visual system development	102	13	12.26	0.45601	0.997823
GO:0001659	temperature homeostasis	53	7	6.37	0.45709	0.997823
GO:0009746	response to hexose	53	7	6.37	0.45709	0.997823
GO:0030048	actin filament-based movement	53	7	6.37	0.45709	0.997823
GO:0034284	response to monosaccharide	53	7	6.37	0.45709	0.997823
GO:0051092	positive regulation of NF-kappaB transcr...	53	7	6.37	0.45709	0.997823
GO:0051606	detection of stimulus	53	7	6.37	0.45709	0.997823
GO:0071478	cellular response to radiation	45	6	5.41	0.46027	0.997823
GO:0009615	response to virus	86	11	10.34	0.46215	0.997823
GO:0010508	positive regulation of autophagy	37	5	4.45	0.46368	0.997823
GO:0014902	myotube differentiation	37	5	4.45	0.46368	0.997823
GO:0031532	actin cytoskeleton reorganization	37	5	4.45	0.46368	0.997823
GO:0050777	negative regulation of immune response	37	5	4.45	0.46368	0.997823
GO:0051588	regulation of neurotransmitter transport	37	5	4.45	0.46368	0.997823
GO:0071901	negative regulation of protein serine/th...	37	5	4.45	0.46368	0.997823
GO:0097696	receptor signaling pathway via STAT	37	5	4.45	0.46368	0.997823
GO:0070482	response to oxygen levels	78	10	9.38	0.46552	0.997823
GO:0002792	negative regulation of peptide secretion	29	4	3.49	0.46735	0.997823
GO:0008593	regulation of Notch signaling pathway	29	4	3.49	0.46735	0.997823
GO:0015837	amine transport	29	4	3.49	0.46735	0.997823
GO:0016064	immunoglobulin mediated immune response	29	4	3.49	0.46735	0.997823
GO:0051952	regulation of amine transport	29	4	3.49	0.46735	0.997823
GO:0070830	bicellular tight junction assembly	29	4	3.49	0.46735	0.997823
GO:1901342	regulation of vasculature development	111	14	13.34	0.46739	0.997823
GO:0043543	protein acylation	70	9	8.42	0.46915	0.997823
GO:0045862	positive regulation of proteolysis	103	13	12.38	0.47076	0.997823
GO:0006099	tricarboxylic acid cycle	21	3	2.52	0.47126	0.997823
GO:0006940	regulation of smooth muscle contraction	21	3	2.52	0.47126	0.997823
GO:0008543	fibroblast growth factor receptor signal...	21	3	2.52	0.47126	0.997823
GO:0010171	body morphogenesis	21	3	2.52	0.47126	0.997823
GO:0033692	cellular polysaccharide biosynthetic pro...	21	3	2.52	0.47126	0.997823
GO:0034401	chromatin organization involved in regul...	21	3	2.52	0.47126	0.997823
GO:0043090	amino acid import	21	3	2.52	0.47126	0.997823
GO:0045744	negative regulation of G protein-coupled...	21	3	2.52	0.47126	0.997823
GO:0050688	regulation of defense response to virus	21	3	2.52	0.47126	0.997823
GO:0060324	face development	21	3	2.52	0.47126	0.997823
GO:0090278	negative regulation of peptide hormone s...	21	3	2.52	0.47126	0.997823
GO:1901184	regulation of ERBB signaling pathway	21	3	2.52	0.47126	0.997823
GO:1903428	positive regulation of reactive oxygen s...	21	3	2.52	0.47126	0.997823
GO:0051054	positive regulation of DNA metabolic pro...	62	8	7.45	0.47310	0.997823
GO:2001020	regulation of response to DNA damage sti...	62	8	7.45	0.47310	0.997823
GO:0001933	negative regulation of protein phosphory...	95	12	11.42	0.47435	0.997823
GO:0000966	RNA 5'-end processing	13	2	1.56	0.47498	0.997823
GO:0002714	positive regulation of B cell mediated i...	13	2	1.56	0.47498	0.997823
GO:0002891	positive regulation of immunoglobulin me...	13	2	1.56	0.47498	0.997823
GO:0007140	male meiotic nuclear division	13	2	1.56	0.47498	0.997823
GO:0009154	purine ribonucleotide catabolic process	13	2	1.56	0.47498	0.997823
GO:0010862	positive regulation of pathway-restricte...	13	2	1.56	0.47498	0.997823
GO:0014002	astrocyte development	13	2	1.56	0.47498	0.997823
GO:0018023	peptidyl-lysine trimethylation	13	2	1.56	0.47498	0.997823
GO:0031952	regulation of protein autophosphorylatio...	13	2	1.56	0.47498	0.997823
GO:0033628	regulation of cell adhesion mediated by ...	13	2	1.56	0.47498	0.997823
GO:0038066	p38MAPK cascade	13	2	1.56	0.47498	0.997823
GO:0042491	inner ear auditory receptor cell differe...	13	2	1.56	0.47498	0.997823
GO:0042554	superoxide anion generation	13	2	1.56	0.47498	0.997823
GO:0045022	early endosome to late endosome transpor...	13	2	1.56	0.47498	0.997823
GO:0045620	negative regulation of lymphocyte differ...	13	2	1.56	0.47498	0.997823
GO:0045823	positive regulation of heart contraction	13	2	1.56	0.47498	0.997823
GO:0045912	negative regulation of carbohydrate meta...	13	2	1.56	0.47498	0.997823
GO:0048663	neuron fate commitment	13	2	1.56	0.47498	0.997823
GO:0050856	regulation of T cell receptor signaling ...	13	2	1.56	0.47498	0.997823
GO:0051497	negative regulation of stress fiber asse...	13	2	1.56	0.47498	0.997823
GO:0051954	positive regulation of amine transport	13	2	1.56	0.47498	0.997823
GO:0055023	positive regulation of cardiac muscle ti...	13	2	1.56	0.47498	0.997823
GO:0071320	cellular response to cAMP	13	2	1.56	0.47498	0.997823
GO:0071709	membrane assembly	13	2	1.56	0.47498	0.997823
GO:0072583	clathrin-dependent endocytosis	13	2	1.56	0.47498	0.997823
GO:0098751	bone cell development	13	2	1.56	0.47498	0.997823
GO:1903524	positive regulation of blood circulation	13	2	1.56	0.47498	0.997823
GO:1903573	negative regulation of response to endop...	13	2	1.56	0.47498	0.997823
GO:2000193	positive regulation of fatty acid transp...	13	2	1.56	0.47498	0.997823
GO:2000785	regulation of autophagosome assembly	13	2	1.56	0.47498	0.997823
GO:0071345	cellular response to cytokine stimulus	219	27	26.33	0.47562	0.997823
GO:0019941	modification-dependent protein catabolic...	153	19	18.39	0.47727	0.997823
GO:0007043	cell-cell junction assembly	54	7	6.49	0.47746	0.997823
GO:0043433	negative regulation of DNA-binding trans...	54	7	6.49	0.47746	0.997823
GO:0042060	wound healing	120	15	14.43	0.47791	0.997823
GO:0002791	regulation of peptide secretion	87	11	10.46	0.47820	0.997823
GO:0044703	multi-organism reproductive process	211	26	25.37	0.47844	0.997823
GO:0051248	negative regulation of protein metabolic...	269	33	32.34	0.47893	0.997823
GO:0050851	antigen receptor-mediated signaling path...	46	6	5.53	0.48236	0.997823
GO:0003018	vascular process in circulatory system	79	10	9.5	0.48236	0.997823
GO:0051336	regulation of hydrolase activity	278	34	33.42	0.48549	0.997823
GO:0048878	chemical homeostasis	361	44	43.4	0.48598	0.997823
GO:0051495	positive regulation of cytoskeleton orga...	71	9	8.54	0.48691	0.997823
GO:1905475	regulation of protein localization to me...	71	9	8.54	0.48691	0.997823
GO:0007049	cell cycle	469	57	56.38	0.48691	0.997823
GO:0051241	negative regulation of multicellular org...	328	40	39.43	0.48752	0.997823
GO:0051098	regulation of binding	129	16	15.51	0.48768	0.997823
GO:0001885	endothelial cell development	38	5	4.57	0.48800	0.997823
GO:0007369	gastrulation	38	5	4.57	0.48800	0.997823
GO:0010906	regulation of glucose metabolic process	38	5	4.57	0.48800	0.997823
GO:0050714	positive regulation of protein secretion	38	5	4.57	0.48800	0.997823
GO:0110020	regulation of actomyosin structure organ...	38	5	4.57	0.48800	0.997823
GO:1901657	glycosyl compound metabolic process	38	5	4.57	0.48800	0.997823
GO:0045595	regulation of cell differentiation	461	56	55.42	0.48909	0.997823
GO:0008015	blood circulation	154	19	18.51	0.48939	0.997823
GO:0030111	regulation of Wnt signaling pathway	96	12	11.54	0.48964	0.997823
GO:0016055	Wnt signaling pathway	121	15	14.55	0.49155	0.997823
GO:0007249	I-kappaB kinase/NF-kappaB signaling	63	8	7.57	0.49195	0.997823
GO:0001822	kidney development	88	11	10.58	0.49415	0.997823
GO:0070372	regulation of ERK1 and ERK2 cascade	88	11	10.58	0.49415	0.997823
GO:0090407	organophosphate biosynthetic process	171	21	20.56	0.49418	0.997823
GO:0000018	regulation of DNA recombination	30	4	3.61	0.49476	0.997823
GO:0006497	protein lipidation	30	4	3.61	0.49476	0.997823
GO:0007189	adenylate cyclase-activating G protein-c...	30	4	3.61	0.49476	0.997823
GO:0008344	adult locomotory behavior	30	4	3.61	0.49476	0.997823
GO:0016079	synaptic vesicle exocytosis	30	4	3.61	0.49476	0.997823
GO:0019724	B cell mediated immunity	30	4	3.61	0.49476	0.997823
GO:0046928	regulation of neurotransmitter secretion	30	4	3.61	0.49476	0.997823
GO:0120192	tight junction assembly	30	4	3.61	0.49476	0.997823
GO:0006417	regulation of translation	113	14	13.58	0.49567	0.997823
GO:0080134	regulation of response to stress	354	43	42.56	0.49657	0.997823
GO:0032269	negative regulation of cellular protein ...	246	30	29.57	0.49677	0.997823
GO:0043484	regulation of RNA splicing	55	7	6.61	0.49762	0.997823
GO:0072507	divalent inorganic cation homeostasis	163	20	19.6	0.49774	0.997823
GO:0045216	cell-cell junction organization	80	10	9.62	0.49908	0.997823
GO:0043270	positive regulation of ion transport	213	26	25.61	0.49921	0.997823
GO:0060548	negative regulation of cell death	313	38	37.63	0.50131	0.997823
GO:0033043	regulation of organelle organization	363	44	43.64	0.50214	0.997823
GO:0006635	fatty acid beta-oxidation	22	3	2.64	0.50335	0.997823
GO:0006749	glutathione metabolic process	22	3	2.64	0.50335	0.997823
GO:0007338	single fertilization	22	3	2.64	0.50335	0.997823
GO:0031016	pancreas development	22	3	2.64	0.50335	0.997823
GO:0046634	regulation of alpha-beta T cell activati...	22	3	2.64	0.50335	0.997823
GO:0051702	biological process involved in interacti...	22	3	2.64	0.50335	0.997823
GO:0051817	modulation of process of other organism ...	22	3	2.64	0.50335	0.997823
GO:0061097	regulation of protein tyrosine kinase ac...	22	3	2.64	0.50335	0.997823
GO:0061333	renal tubule morphogenesis	22	3	2.64	0.50335	0.997823
GO:0072080	nephron tubule development	22	3	2.64	0.50335	0.997823
GO:0086001	cardiac muscle cell action potential	22	3	2.64	0.50335	0.997823
GO:0090559	regulation of membrane permeability	22	3	2.64	0.50335	0.997823
GO:1905897	regulation of response to endoplasmic re...	22	3	2.64	0.50335	0.997823
GO:2001238	positive regulation of extrinsic apoptot...	22	3	2.64	0.50335	0.997823
GO:0031099	regeneration	47	6	5.65	0.50416	0.997823
GO:0042742	defense response to bacterium	47	6	5.65	0.50416	0.997823
GO:0051648	vesicle localization	47	6	5.65	0.50416	0.997823
GO:0106106	cold-induced thermogenesis	47	6	5.65	0.50416	0.997823
GO:0120161	regulation of cold-induced thermogenesis	47	6	5.65	0.50416	0.997823
GO:1903409	reactive oxygen species biosynthetic pro...	47	6	5.65	0.50416	0.997823
GO:0071496	cellular response to external stimulus	72	9	8.66	0.50452	0.997823
GO:0002250	adaptive immune response	97	12	11.66	0.50483	0.997823
GO:0003008	system process	455	55	54.7	0.50588	0.997823
GO:0001558	regulation of cell growth	114	14	13.7	0.50969	0.997823
GO:0002683	negative regulation of immune system pro...	114	14	13.7	0.50969	0.997823
GO:0002449	lymphocyte mediated immunity	64	8	7.69	0.51060	0.997823
GO:0006470	protein dephosphorylation	64	8	7.69	0.51060	0.997823
GO:1901215	negative regulation of neuron death	64	8	7.69	0.51060	0.997823
GO:0001764	neuron migration	39	5	4.69	0.51192	0.997823
GO:0005976	polysaccharide metabolic process	39	5	4.69	0.51192	0.997823
GO:0048024	regulation of mRNA splicing, via spliceo...	39	5	4.69	0.51192	0.997823
GO:0009117	nucleotide metabolic process	156	19	18.75	0.51350	0.997823
GO:0043632	modification-dependent macromolecule cat...	156	19	18.75	0.51350	0.997823
GO:0002228	natural killer cell mediated immunity	14	2	1.68	0.51545	0.997823
GO:0002293	alpha-beta T cell differentiation involv...	14	2	1.68	0.51545	0.997823
GO:0002294	CD4-positive, alpha-beta T cell differen...	14	2	1.68	0.51545	0.997823
GO:0002639	positive regulation of immunoglobulin pr...	14	2	1.68	0.51545	0.997823
GO:0006378	mRNA polyadenylation	14	2	1.68	0.51545	0.997823
GO:0010613	positive regulation of cardiac muscle hy...	14	2	1.68	0.51545	0.997823
GO:0014742	positive regulation of muscle hypertroph...	14	2	1.68	0.51545	0.997823
GO:0016601	Rac protein signal transduction	14	2	1.68	0.51545	0.997823
GO:0019748	secondary metabolic process	14	2	1.68	0.51545	0.997823
GO:0030517	negative regulation of axon extension	14	2	1.68	0.51545	0.997823
GO:0032873	negative regulation of stress-activated ...	14	2	1.68	0.51545	0.997823
GO:0032885	regulation of polysaccharide biosyntheti...	14	2	1.68	0.51545	0.997823
GO:0033003	regulation of mast cell activation	14	2	1.68	0.51545	0.997823
GO:0035025	positive regulation of Rho protein signa...	14	2	1.68	0.51545	0.997823
GO:0035306	positive regulation of dephosphorylation	14	2	1.68	0.51545	0.997823
GO:0035315	hair cell differentiation	14	2	1.68	0.51545	0.997823
GO:0040036	regulation of fibroblast growth factor r...	14	2	1.68	0.51545	0.997823
GO:0042093	T-helper cell differentiation	14	2	1.68	0.51545	0.997823
GO:0042267	natural killer cell mediated cytotoxicit...	14	2	1.68	0.51545	0.997823
GO:0043631	RNA polyadenylation	14	2	1.68	0.51545	0.997823
GO:0044091	membrane biogenesis	14	2	1.68	0.51545	0.997823
GO:0045933	positive regulation of muscle contractio...	14	2	1.68	0.51545	0.997823
GO:0046460	neutral lipid biosynthetic process	14	2	1.68	0.51545	0.997823
GO:0046463	acylglycerol biosynthetic process	14	2	1.68	0.51545	0.997823
GO:0048169	regulation of long-term neuronal synapti...	14	2	1.68	0.51545	0.997823
GO:0050974	detection of mechanical stimulus involve...	14	2	1.68	0.51545	0.997823
GO:0051785	positive regulation of nuclear division	14	2	1.68	0.51545	0.997823
GO:0051898	negative regulation of protein kinase B ...	14	2	1.68	0.51545	0.997823
GO:0060325	face morphogenesis	14	2	1.68	0.51545	0.997823
GO:0060421	positive regulation of heart growth	14	2	1.68	0.51545	0.997823
GO:0060986	endocrine hormone secretion	14	2	1.68	0.51545	0.997823
GO:0070296	sarcoplasmic reticulum calcium ion trans...	14	2	1.68	0.51545	0.997823
GO:0070303	negative regulation of stress-activated ...	14	2	1.68	0.51545	0.997823
GO:0071470	cellular response to osmotic stress	14	2	1.68	0.51545	0.997823
GO:0086009	membrane repolarization	14	2	1.68	0.51545	0.997823
GO:0098901	regulation of cardiac muscle cell action...	14	2	1.68	0.51545	0.997823
GO:0098927	vesicle-mediated transport between endos...	14	2	1.68	0.51545	0.997823
GO:1900271	regulation of long-term synaptic potenti...	14	2	1.68	0.51545	0.997823
GO:2000781	positive regulation of double-strand bre...	14	2	1.68	0.51545	0.997823
GO:0006898	receptor-mediated endocytosis	81	10	9.74	0.51566	0.997823
GO:0050708	regulation of protein secretion	81	10	9.74	0.51566	0.997823
GO:0001775	cell activation	273	33	32.82	0.51588	0.997823
GO:0034097	response to cytokine	248	30	29.81	0.51606	0.997823
GO:0001935	endothelial cell proliferation	56	7	6.73	0.51754	0.997823
GO:0048639	positive regulation of developmental gro...	56	7	6.73	0.51754	0.997823
GO:0052548	regulation of endopeptidase activity	98	12	11.78	0.51991	0.997823
GO:0002027	regulation of heart rate	31	4	3.73	0.52156	0.997823
GO:0002367	cytokine production involved in immune r...	31	4	3.73	0.52156	0.997823
GO:0006413	translational initiation	31	4	3.73	0.52156	0.997823
GO:0007052	mitotic spindle organization	31	4	3.73	0.52156	0.997823
GO:0009116	nucleoside metabolic process	31	4	3.73	0.52156	0.997823
GO:0019217	regulation of fatty acid metabolic proce...	31	4	3.73	0.52156	0.997823
GO:0030168	platelet activation	31	4	3.73	0.52156	0.997823
GO:0042158	lipoprotein biosynthetic process	31	4	3.73	0.52156	0.997823
GO:0003015	heart process	73	9	8.78	0.52195	0.997823
GO:0030100	regulation of endocytosis	73	9	8.78	0.52195	0.997823
GO:0090596	sensory organ morphogenesis	73	9	8.78	0.52195	0.997823
GO:2000116	regulation of cysteine-type endopeptidas...	73	9	8.78	0.52195	0.997823
GO:0002244	hematopoietic progenitor cell differenti...	48	6	5.77	0.52562	0.997823
GO:0010675	regulation of cellular carbohydrate meta...	48	6	5.77	0.52562	0.997823
GO:0032368	regulation of lipid transport	48	6	5.77	0.52562	0.997823
GO:0045619	regulation of lymphocyte differentiation	48	6	5.77	0.52562	0.997823
GO:0097435	supramolecular fiber organization	249	30	29.93	0.52565	0.997823
GO:0051704	multi-organism process	224	27	26.93	0.52640	0.997823
GO:0055086	nucleobase-containing small molecule met...	174	21	20.92	0.52848	0.997823
GO:0032868	response to insulin	65	8	7.81	0.52903	0.997823
GO:0030162	regulation of proteolysis	191	23	22.96	0.53129	0.997823
GO:0000041	transition metal ion transport	23	3	2.77	0.53440	0.997823
GO:0003281	ventricular septum development	23	3	2.77	0.53440	0.997823
GO:0008306	associative learning	23	3	2.77	0.53440	0.997823
GO:0015807	L-amino acid transport	23	3	2.77	0.53440	0.997823
GO:0032945	negative regulation of mononuclear cell ...	23	3	2.77	0.53440	0.997823
GO:0033619	membrane protein proteolysis	23	3	2.77	0.53440	0.997823
GO:0043154	negative regulation of cysteine-type end...	23	3	2.77	0.53440	0.997823
GO:0043954	cellular component maintenance	23	3	2.77	0.53440	0.997823
GO:0045739	positive regulation of DNA repair	23	3	2.77	0.53440	0.997823
GO:0046425	regulation of receptor signaling pathway...	23	3	2.77	0.53440	0.997823
GO:0050672	negative regulation of lymphocyte prolif...	23	3	2.77	0.53440	0.997823
GO:0061383	trabecula morphogenesis	23	3	2.77	0.53440	0.997823
GO:0070972	protein localization to endoplasmic reti...	23	3	2.77	0.53440	0.997823
GO:1901264	carbohydrate derivative transport	23	3	2.77	0.53440	0.997823
GO:0016311	dephosphorylation	99	12	11.9	0.53485	0.997823
GO:0001841	neural tube formation	40	5	4.81	0.53536	0.997823
GO:0043467	regulation of generation of precursor me...	40	5	4.81	0.53536	0.997823
GO:0045580	regulation of T cell differentiation	40	5	4.81	0.53536	0.997823
GO:0048592	eye morphogenesis	40	5	4.81	0.53536	0.997823
GO:0070252	actin-mediated cell contraction	40	5	4.81	0.53536	0.997823
GO:0090305	nucleic acid phosphodiester bond hydroly...	40	5	4.81	0.53536	0.997823
GO:0006954	inflammatory response	183	22	22	0.53544	0.997823
GO:0006109	regulation of carbohydrate metabolic pro...	57	7	6.85	0.53716	0.997823
GO:0006575	cellular modified amino acid metabolic p...	57	7	6.85	0.53716	0.997823
GO:0090276	regulation of peptide hormone secretion	57	7	6.85	0.53716	0.997823
GO:0006753	nucleoside phosphate metabolic process	158	19	18.99	0.53735	0.997823
GO:0031329	regulation of cellular catabolic process	200	24	24.04	0.53793	0.997823
GO:0007611	learning or memory	74	9	8.9	0.53917	0.997823
GO:0022402	cell cycle process	326	39	39.19	0.54102	0.997823
GO:0072001	renal system development	91	11	10.94	0.54124	0.997823
GO:0006865	amino acid transport	49	6	5.89	0.54670	0.997823
GO:0014065	phosphatidylinositol 3-kinase signaling	49	6	5.89	0.54670	0.997823
GO:0050796	regulation of insulin secretion	49	6	5.89	0.54670	0.997823
GO:1990845	adaptive thermogenesis	49	6	5.89	0.54670	0.997823
GO:2001056	positive regulation of cysteine-type end...	49	6	5.89	0.54670	0.997823
GO:0002456	T cell mediated immunity	32	4	3.85	0.54766	0.997823
GO:0006641	triglyceride metabolic process	32	4	3.85	0.54766	0.997823
GO:0010660	regulation of muscle cell apoptotic proc...	32	4	3.85	0.54766	0.997823
GO:0019395	fatty acid oxidation	32	4	3.85	0.54766	0.997823
GO:0042274	ribosomal small subunit biogenesis	32	4	3.85	0.54766	0.997823
GO:0048675	axon extension	32	4	3.85	0.54766	0.997823
GO:0071456	cellular response to hypoxia	32	4	3.85	0.54766	0.997823
GO:0120193	tight junction organization	32	4	3.85	0.54766	0.997823
GO:0010001	glial cell differentiation	83	10	9.98	0.54829	0.997823
GO:0042391	regulation of membrane potential	117	14	14.07	0.55112	0.997823
GO:0061564	axon development	134	16	16.11	0.55266	0.997823
GO:0001961	positive regulation of cytokine-mediated...	15	2	1.8	0.55379	0.997823
GO:0001974	blood vessel remodeling	15	2	1.8	0.55379	0.997823
GO:0002287	alpha-beta T cell activation involved in...	15	2	1.8	0.55379	0.997823
GO:0002292	T cell differentiation involved in immun...	15	2	1.8	0.55379	0.997823
GO:0006195	purine nucleotide catabolic process	15	2	1.8	0.55379	0.997823
GO:0006801	superoxide metabolic process	15	2	1.8	0.55379	0.997823
GO:0007405	neuroblast proliferation	15	2	1.8	0.55379	0.997823
GO:0007520	myoblast fusion	15	2	1.8	0.55379	0.997823
GO:0017158	regulation of calcium ion-dependent exoc...	15	2	1.8	0.55379	0.997823
GO:0032232	negative regulation of actin filament bu...	15	2	1.8	0.55379	0.997823
GO:0032757	positive regulation of interleukin-8 pro...	15	2	1.8	0.55379	0.997823
GO:0035690	cellular response to drug	15	2	1.8	0.55379	0.997823
GO:0042304	regulation of fatty acid biosynthetic pr...	15	2	1.8	0.55379	0.997823
GO:0042398	cellular modified amino acid biosyntheti...	15	2	1.8	0.55379	0.997823
GO:0043618	regulation of transcription from RNA pol...	15	2	1.8	0.55379	0.997823
GO:0045911	positive regulation of DNA recombination	15	2	1.8	0.55379	0.997823
GO:0048265	response to pain	15	2	1.8	0.55379	0.997823
GO:0048701	embryonic cranial skeleton morphogenesis	15	2	1.8	0.55379	0.997823
GO:0050432	catecholamine secretion	15	2	1.8	0.55379	0.997823
GO:0050433	regulation of catecholamine secretion	15	2	1.8	0.55379	0.997823
GO:0051851	modulation by host of symbiont process	15	2	1.8	0.55379	0.997823
GO:0060119	inner ear receptor cell development	15	2	1.8	0.55379	0.997823
GO:0070098	chemokine-mediated signaling pathway	15	2	1.8	0.55379	0.997823
GO:0090199	regulation of release of cytochrome c fr...	15	2	1.8	0.55379	0.997823
GO:1902001	fatty acid transmembrane transport	15	2	1.8	0.55379	0.997823
GO:1903961	positive regulation of anion transmembra...	15	2	1.8	0.55379	0.997823
GO:1904707	positive regulation of vascular associat...	15	2	1.8	0.55379	0.997823
GO:0043534	blood vessel endothelial cell migration	58	7	6.97	0.55645	0.997823
GO:0070588	calcium ion transmembrane transport	92	11	11.06	0.55660	0.997823
GO:0044403	biological process involved in symbiotic...	109	13	13.1	0.55741	0.997823
GO:0043123	positive regulation of I-kappaB kinase/N...	41	5	4.93	0.55828	0.997823
GO:0051701	biological process involved in interacti...	41	5	4.93	0.55828	0.997823
GO:0071356	cellular response to tumor necrosis fact...	41	5	4.93	0.55828	0.997823
GO:1902806	regulation of cell cycle G1/S phase tran...	41	5	4.93	0.55828	0.997823
GO:1903828	negative regulation of cellular protein ...	41	5	4.93	0.55828	0.997823
GO:2000146	negative regulation of cell motility	101	12	12.14	0.56426	0.997823
GO:0008154	actin polymerization or depolymerization	84	10	10.1	0.56429	0.997823
GO:0002286	T cell activation involved in immune res...	24	3	2.89	0.56433	0.997823
GO:0002312	B cell activation involved in immune res...	24	3	2.89	0.56433	0.997823
GO:0009798	axis specification	24	3	2.89	0.56433	0.997823
GO:0015914	phospholipid transport	24	3	2.89	0.56433	0.997823
GO:0030490	maturation of SSU-rRNA	24	3	2.89	0.56433	0.997823
GO:0031102	neuron projection regeneration	24	3	2.89	0.56433	0.997823
GO:0033209	tumor necrosis factor-mediated signaling...	24	3	2.89	0.56433	0.997823
GO:0046632	alpha-beta T cell differentiation	24	3	2.89	0.56433	0.997823
GO:0051693	actin filament capping	24	3	2.89	0.56433	0.997823
GO:0061337	cardiac conduction	24	3	2.89	0.56433	0.997823
GO:1902117	positive regulation of organelle assembl...	24	3	2.89	0.56433	0.997823
GO:0006869	lipid transport	118	14	14.19	0.56466	0.997823
GO:0031330	negative regulation of cellular cataboli...	67	8	8.05	0.56509	0.997823
GO:0045597	positive regulation of cell differentiat...	245	29	29.45	0.56757	0.997823
GO:1902531	regulation of intracellular signal trans...	464	55	55.78	0.57066	0.997823
GO:0040013	negative regulation of locomotion	110	13	13.22	0.57138	0.997823
GO:0051258	protein polymerization	110	13	13.22	0.57138	0.997823
GO:0018108	peptidyl-tyrosine phosphorylation	93	11	11.18	0.57176	0.997823
GO:0018212	peptidyl-tyrosine modification	93	11	11.18	0.57176	0.997823
GO:0030336	negative regulation of cell migration	93	11	11.18	0.57176	0.997823
GO:0071495	cellular response to endogenous stimulus	355	42	42.68	0.57234	0.997823
GO:0016358	dendrite development	76	9	9.14	0.57290	0.997823
GO:0001843	neural tube closure	33	4	3.97	0.57300	0.997823
GO:0001938	positive regulation of endothelial cell ...	33	4	3.97	0.57300	0.997823
GO:0010657	muscle cell apoptotic process	33	4	3.97	0.57300	0.997823
GO:0014013	regulation of gliogenesis	33	4	3.97	0.57300	0.997823
GO:0019915	lipid storage	33	4	3.97	0.57300	0.997823
GO:0034440	lipid oxidation	33	4	3.97	0.57300	0.997823
GO:0036294	cellular response to decreased oxygen le...	33	4	3.97	0.57300	0.997823
GO:0051341	regulation of oxidoreductase activity	33	4	3.97	0.57300	0.997823
GO:0003158	endothelium development	59	7	7.09	0.57539	0.997823
GO:0032869	cellular response to insulin stimulus	59	7	7.09	0.57539	0.997823
GO:1902115	regulation of organelle assembly	59	7	7.09	0.57539	0.997823
GO:0031331	positive regulation of cellular cataboli...	102	12	12.26	0.57869	0.997823
GO:0071692	protein localization to extracellular re...	102	12	12.26	0.57869	0.997823
GO:0002443	leukocyte mediated immunity	85	10	10.22	0.58006	0.997823
GO:0000910	cytokinesis	42	5	5.05	0.58063	0.997823
GO:0001906	cell killing	42	5	5.05	0.58063	0.997823
GO:0007269	neurotransmitter secretion	42	5	5.05	0.58063	0.997823
GO:0035637	multicellular organismal signaling	42	5	5.05	0.58063	0.997823
GO:0045185	maintenance of protein location	42	5	5.05	0.58063	0.997823
GO:0050680	negative regulation of epithelial cell p...	42	5	5.05	0.58063	0.997823
GO:0099643	signal release from synapse	42	5	5.05	0.58063	0.997823
GO:1903076	regulation of protein localization to pl...	42	5	5.05	0.58063	0.997823
GO:1903426	regulation of reactive oxygen species bi...	42	5	5.05	0.58063	0.997823
GO:0043085	positive regulation of catalytic activit...	331	39	39.79	0.58255	0.997823
GO:0045055	regulated exocytosis	68	8	8.17	0.58266	0.997823
GO:0046883	regulation of hormone secretion	68	8	8.17	0.58266	0.997823
GO:0098813	nuclear chromosome segregation	68	8	8.17	0.58266	0.997823
GO:0050804	modulation of chemical synaptic transmis...	128	15	15.39	0.58435	0.997823
GO:0006066	alcohol metabolic process	94	11	11.3	0.58670	0.997823
GO:0048193	Golgi vesicle transport	94	11	11.3	0.58670	0.997823
GO:0001890	placenta development	51	6	6.13	0.58755	0.997823
GO:0051216	cartilage development	51	6	6.13	0.58755	0.997823
GO:0071214	cellular response to abiotic stimulus	77	9	9.26	0.58935	0.997823
GO:0104004	cellular response to environmental stimu...	77	9	9.26	0.58935	0.997823
GO:0030855	epithelial cell differentiation	171	20	20.56	0.58962	0.997823
GO:0032990	cell part morphogenesis	188	22	22.6	0.58968	0.997823
GO:0000387	spliceosomal snRNP assembly	16	2	1.92	0.58994	0.997823
GO:0001895	retina homeostasis	16	2	1.92	0.58994	0.997823
GO:0001945	lymph vessel development	16	2	1.92	0.58994	0.997823
GO:0002548	monocyte chemotaxis	16	2	1.92	0.58994	0.997823
GO:0030219	megakaryocyte differentiation	16	2	1.92	0.58994	0.997823
GO:0031638	zymogen activation	16	2	1.92	0.58994	0.997823
GO:0032881	regulation of polysaccharide metabolic p...	16	2	1.92	0.58994	0.997823
GO:0043277	apoptotic cell clearance	16	2	1.92	0.58994	0.997823
GO:0043966	histone H3 acetylation	16	2	1.92	0.58994	0.997823
GO:0044728	DNA methylation or demethylation	16	2	1.92	0.58994	0.997823
GO:0045907	positive regulation of vasoconstriction	16	2	1.92	0.58994	0.997823
GO:0046834	lipid phosphorylation	16	2	1.92	0.58994	0.997823
GO:0046902	regulation of mitochondrial membrane per...	16	2	1.92	0.58994	0.997823
GO:0050805	negative regulation of synaptic transmis...	16	2	1.92	0.58994	0.997823
GO:0050873	brown fat cell differentiation	16	2	1.92	0.58994	0.997823
GO:0050879	multicellular organismal movement	16	2	1.92	0.58994	0.997823
GO:0050881	musculoskeletal movement	16	2	1.92	0.58994	0.997823
GO:0050922	negative regulation of chemotaxis	16	2	1.92	0.58994	0.997823
GO:0060337	type I interferon signaling pathway	16	2	1.92	0.58994	0.997823
GO:0070527	platelet aggregation	16	2	1.92	0.58994	0.997823
GO:0071357	cellular response to type I interferon	16	2	1.92	0.58994	0.997823
GO:0086091	regulation of heart rate by cardiac cond...	16	2	1.92	0.58994	0.997823
GO:0090175	regulation of establishment of planar po...	16	2	1.92	0.58994	0.997823
GO:0097479	synaptic vesicle localization	16	2	1.92	0.58994	0.997823
GO:1904645	response to amyloid-beta	16	2	1.92	0.58994	0.997823
GO:1905953	negative regulation of lipid localizatio...	16	2	1.92	0.58994	0.997823
GO:0034248	regulation of cellular amide metabolic p...	137	16	16.47	0.59031	0.997823
GO:0009896	positive regulation of catabolic process	120	14	14.43	0.59129	0.997823
GO:0048872	homeostasis of number of cells	103	12	12.38	0.59292	0.997823
GO:0002090	regulation of receptor internalization	25	3	3.01	0.59305	0.997823
GO:0006664	glycolipid metabolic process	25	3	3.01	0.59305	0.997823
GO:0014068	positive regulation of phosphatidylinosi...	25	3	3.01	0.59305	0.997823
GO:0019730	antimicrobial humoral response	25	3	3.01	0.59305	0.997823
GO:0030835	negative regulation of actin filament de...	25	3	3.01	0.59305	0.997823
GO:0031110	regulation of microtubule polymerization...	25	3	3.01	0.59305	0.997823
GO:0032088	negative regulation of NF-kappaB transcr...	25	3	3.01	0.59305	0.997823
GO:0034109	homotypic cell-cell adhesion	25	3	3.01	0.59305	0.997823
GO:0035282	segmentation	25	3	3.01	0.59305	0.997823
GO:0050871	positive regulation of B cell activation	25	3	3.01	0.59305	0.997823
GO:0051668	localization within membrane	25	3	3.01	0.59305	0.997823
GO:0060291	long-term synaptic potentiation	25	3	3.01	0.59305	0.997823
GO:0070664	negative regulation of leukocyte prolife...	25	3	3.01	0.59305	0.997823
GO:1903509	liposaccharide metabolic process	25	3	3.01	0.59305	0.997823
GO:1904029	regulation of cyclin-dependent protein k...	25	3	3.01	0.59305	0.997823
GO:2000779	regulation of double-strand break repair	25	3	3.01	0.59305	0.997823
GO:0006629	lipid metabolic process	383	45	46.04	0.59362	0.997823
GO:0051094	positive regulation of developmental pro...	383	45	46.04	0.59362	0.997823
GO:0051493	regulation of cytoskeleton organization	180	21	21.64	0.59503	0.997823
GO:0009895	negative regulation of catabolic process	86	10	10.34	0.59557	0.997823
GO:0051604	protein maturation	86	10	10.34	0.59557	0.997823
GO:0060485	mesenchyme development	86	10	10.34	0.59557	0.997823
GO:0099177	regulation of trans-synaptic signaling	129	15	15.51	0.59707	0.997823
GO:0007368	determination of left/right symmetry	34	4	4.09	0.59752	0.997823
GO:0044264	cellular polysaccharide metabolic proces...	34	4	4.09	0.59752	0.997823
GO:0046031	ADP metabolic process	34	4	4.09	0.59752	0.997823
GO:0051492	regulation of stress fiber assembly	34	4	4.09	0.59752	0.997823
GO:0060606	tube closure	34	4	4.09	0.59752	0.997823
GO:2000278	regulation of DNA biosynthetic process	34	4	4.09	0.59752	0.997823
GO:0001503	ossification	112	13	13.46	0.59878	0.997823
GO:0001666	response to hypoxia	69	8	8.3	0.59989	0.997823
GO:0051050	positive regulation of transport	291	34	34.98	0.60139	0.997823
GO:0072503	cellular divalent inorganic cation homeo...	155	18	18.63	0.60141	0.997823
GO:0002695	negative regulation of leukocyte activat...	43	5	5.17	0.60236	0.997823
GO:0007050	cell cycle arrest	43	5	5.17	0.60236	0.997823
GO:0033135	regulation of peptidyl-serine phosphoryl...	43	5	5.17	0.60236	0.997823
GO:0046467	membrane lipid biosynthetic process	43	5	5.17	0.60236	0.997823
GO:1901136	carbohydrate derivative catabolic proces...	43	5	5.17	0.60236	0.997823
GO:0032870	cellular response to hormone stimulus	138	16	16.59	0.60258	0.997823
GO:0051270	regulation of cellular component movemen...	359	42	43.16	0.60387	0.997823
GO:0007167	enzyme linked receptor protein signaling...	283	33	34.02	0.60549	0.997823
GO:0110053	regulation of actin filament organizatio...	104	12	12.5	0.60694	0.997823
GO:0002429	immune response-activating cell surface ...	52	6	6.25	0.60724	0.997823
GO:0002757	immune response-activating signal transd...	52	6	6.25	0.60724	0.997823
GO:0071241	cellular response to inorganic substance	52	6	6.25	0.60724	0.997823
GO:0006874	cellular calcium ion homeostasis	147	17	17.67	0.60783	0.997823
GO:0006816	calcium ion transport	130	15	15.63	0.60962	0.997823
GO:0016049	cell growth	130	15	15.63	0.60962	0.997823
GO:0008610	lipid biosynthetic process	190	22	22.84	0.61069	0.997823
GO:0001505	regulation of neurotransmitter levels	61	7	7.33	0.61206	0.997823
GO:0010976	positive regulation of neuron projection...	61	7	7.33	0.61206	0.997823
GO:0015850	organic hydroxy compound transport	61	7	7.33	0.61206	0.997823
GO:0048667	cell morphogenesis involved in neuron di...	156	18	18.75	0.61287	0.997823
GO:0010563	negative regulation of phosphorus metabo...	139	16	16.71	0.61468	0.997823
GO:0045936	negative regulation of phosphate metabol...	139	16	16.71	0.61468	0.997823
GO:0051046	regulation of secretion	182	21	21.88	0.61639	0.997823
GO:0008654	phospholipid biosynthetic process	70	8	8.42	0.61676	0.997823
GO:0043588	skin development	70	8	8.42	0.61676	0.997823
GO:0003013	circulatory system process	165	19	19.84	0.61771	0.997823
GO:0009894	regulation of catabolic process	242	28	29.09	0.61885	0.997823
GO:0000122	negative regulation of transcription by ...	225	26	27.05	0.61933	0.997823
GO:0001578	microtubule bundle formation	26	3	3.13	0.62052	0.997823
GO:0006352	DNA-templated transcription, initiation	26	3	3.13	0.62052	0.997823
GO:0034637	cellular carbohydrate biosynthetic proce...	26	3	3.13	0.62052	0.997823
GO:0035821	modulation of process of other organism	26	3	3.13	0.62052	0.997823
GO:0044106	cellular amine metabolic process	26	3	3.13	0.62052	0.997823
GO:0046579	positive regulation of Ras protein signa...	26	3	3.13	0.62052	0.997823
GO:0046888	negative regulation of hormone secretion	26	3	3.13	0.62052	0.997823
GO:0048010	vascular endothelial growth factor recep...	26	3	3.13	0.62052	0.997823
GO:0051057	positive regulation of small GTPase medi...	26	3	3.13	0.62052	0.997823
GO:0061028	establishment of endothelial barrier	26	3	3.13	0.62052	0.997823
GO:0061326	renal tubule development	26	3	3.13	0.62052	0.997823
GO:0090277	positive regulation of peptide hormone s...	26	3	3.13	0.62052	0.997823
GO:1903078	positive regulation of protein localizat...	26	3	3.13	0.62052	0.997823
GO:0003341	cilium movement	35	4	4.21	0.62118	0.997823
GO:0007259	receptor signaling pathway via JAK-STAT	35	4	4.21	0.62118	0.997823
GO:0009135	purine nucleoside diphosphate metabolic ...	35	4	4.21	0.62118	0.997823
GO:0009179	purine ribonucleoside diphosphate metabo...	35	4	4.21	0.62118	0.997823
GO:0031109	microtubule polymerization or depolymeri...	35	4	4.21	0.62118	0.997823
GO:0045833	negative regulation of lipid metabolic p...	35	4	4.21	0.62118	0.997823
GO:0051250	negative regulation of lymphocyte activa...	35	4	4.21	0.62118	0.997823
GO:0051783	regulation of nuclear division	35	4	4.21	0.62118	0.997823
GO:0018105	peptidyl-serine phosphorylation	79	9	9.5	0.62133	0.997823
GO:0051091	positive regulation of DNA-binding trans...	79	9	9.5	0.62133	0.997823
GO:0044093	positive regulation of molecular functio...	446	52	53.62	0.62179	0.997823
GO:0002822	regulation of adaptive immune response b...	44	5	5.29	0.62343	0.997823
GO:0010951	negative regulation of endopeptidase act...	44	5	5.29	0.62343	0.997823
GO:0006446	regulation of translational initiation	17	2	2.04	0.62386	0.997823
GO:0006509	membrane protein ectodomain proteolysis	17	2	2.04	0.62386	0.997823
GO:0006821	chloride transport	17	2	2.04	0.62386	0.997823
GO:0007584	response to nutrient	17	2	2.04	0.62386	0.997823
GO:0007628	adult walking behavior	17	2	2.04	0.62386	0.997823
GO:0009261	ribonucleotide catabolic process	17	2	2.04	0.62386	0.997823
GO:0031113	regulation of microtubule polymerization	17	2	2.04	0.62386	0.997823
GO:0034332	adherens junction organization	17	2	2.04	0.62386	0.997823
GO:0035082	axoneme assembly	17	2	2.04	0.62386	0.997823
GO:0043392	negative regulation of DNA binding	17	2	2.04	0.62386	0.997823
GO:0043537	negative regulation of blood vessel endo...	17	2	2.04	0.62386	0.997823
GO:0043620	regulation of DNA-templated transcriptio...	17	2	2.04	0.62386	0.997823
GO:0045687	positive regulation of glial cell differ...	17	2	2.04	0.62386	0.997823
GO:0048286	lung alveolus development	17	2	2.04	0.62386	0.997823
GO:0051310	metaphase plate congression	17	2	2.04	0.62386	0.997823
GO:0070129	regulation of mitochondrial translation	17	2	2.04	0.62386	0.997823
GO:0070570	regulation of neuron projection regenera...	17	2	2.04	0.62386	0.997823
GO:0090398	cellular senescence	17	2	2.04	0.62386	0.997823
GO:0090659	walking behavior	17	2	2.04	0.62386	0.997823
GO:1902041	regulation of extrinsic apoptotic signal...	17	2	2.04	0.62386	0.997823
GO:1905476	negative regulation of protein localizat...	17	2	2.04	0.62386	0.997823
GO:2001239	regulation of extrinsic apoptotic signal...	17	2	2.04	0.62386	0.997823
GO:0030031	cell projection assembly	157	18	18.87	0.62419	0.997823
GO:0043010	camera-type eye development	88	10	10.58	0.62577	0.997823
GO:0030073	insulin secretion	53	6	6.37	0.62641	0.997823
GO:0071897	DNA biosynthetic process	53	6	6.37	0.62641	0.997823
GO:0098742	cell-cell adhesion via plasma-membrane a...	53	6	6.37	0.62641	0.997823
GO:0010975	regulation of neuron projection developm...	140	16	16.83	0.62661	0.997823
GO:1901135	carbohydrate derivative metabolic proces...	294	34	35.34	0.62680	0.997823
GO:0070201	regulation of establishment of protein l...	183	21	22	0.62688	0.997823
GO:0016485	protein processing	62	7	7.45	0.62974	0.997823
GO:1905952	regulation of lipid localization	62	7	7.45	0.62974	0.997823
GO:0050878	regulation of body fluid levels	97	11	11.66	0.63009	0.997823
GO:0006909	phagocytosis	71	8	8.54	0.63325	0.997823
GO:0036293	response to decreased oxygen levels	71	8	8.54	0.63325	0.997823
GO:0050803	regulation of synapse structure or activ...	71	8	8.54	0.63325	0.997823
GO:2000026	regulation of multicellular organismal d...	397	46	47.73	0.63476	0.997823
GO:0030036	actin cytoskeleton organization	261	30	31.38	0.63624	0.997823
GO:0051603	proteolysis involved in cellular protein...	184	21	22.12	0.63725	0.997823
GO:0052547	regulation of peptidase activity	115	13	13.83	0.63835	0.997823
GO:0051960	regulation of nervous system development	141	16	16.95	0.63837	0.997823
GO:0033674	positive regulation of kinase activity	150	17	18.03	0.64242	0.997823
GO:0030029	actin filament-based process	296	34	35.58	0.64336	0.997823
GO:0002221	pattern recognition receptor signaling p...	45	5	5.41	0.64383	0.997823
GO:0048813	dendrite morphogenesis	45	5	5.41	0.64383	0.997823
GO:0051261	protein depolymerization	45	5	5.41	0.64383	0.997823
GO:0071383	cellular response to steroid hormone sti...	45	5	5.41	0.64383	0.997823
GO:0006165	nucleoside diphosphate phosphorylation	36	4	4.33	0.64395	0.997823
GO:0006612	protein targeting to membrane	36	4	4.33	0.64395	0.997823
GO:0007612	learning	36	4	4.33	0.64395	0.997823
GO:0014020	primary neural tube formation	36	4	4.33	0.64395	0.997823
GO:0046631	alpha-beta T cell activation	36	4	4.33	0.64395	0.997823
GO:0048661	positive regulation of smooth muscle cel...	36	4	4.33	0.64395	0.997823
GO:0050729	positive regulation of inflammatory resp...	36	4	4.33	0.64395	0.997823
GO:0050764	regulation of phagocytosis	36	4	4.33	0.64395	0.997823
GO:0006814	sodium ion transport	54	6	6.49	0.64503	0.997823
GO:0007519	skeletal muscle tissue development	54	6	6.49	0.64503	0.997823
GO:0043122	regulation of I-kappaB kinase/NF-kappaB ...	54	6	6.49	0.64503	0.997823
GO:0050670	regulation of lymphocyte proliferation	54	6	6.49	0.64503	0.997823
GO:0001738	morphogenesis of a polarized epithelium	27	3	3.25	0.64670	0.997823
GO:0009308	amine metabolic process	27	3	3.25	0.64670	0.997823
GO:0014015	positive regulation of gliogenesis	27	3	3.25	0.64670	0.997823
GO:0072009	nephron epithelium development	27	3	3.25	0.64670	0.997823
GO:2000117	negative regulation of cysteine-type end...	27	3	3.25	0.64670	0.997823
GO:2001243	negative regulation of intrinsic apoptot...	27	3	3.25	0.64670	0.997823
GO:0008361	regulation of cell size	63	7	7.57	0.64696	0.997823
GO:0090087	regulation of peptide transport	185	21	22.24	0.64747	0.997823
GO:0044070	regulation of anion transport	271	31	32.58	0.64873	0.997823
GO:0048588	developmental cell growth	72	8	8.66	0.64934	0.997823
GO:0031400	negative regulation of protein modificat...	142	16	17.07	0.64994	0.997823
GO:0007015	actin filament organization	168	19	20.2	0.65019	0.997823
GO:0031503	protein-containing complex localization	81	9	9.74	0.65198	0.997823
GO:0000165	MAPK cascade	220	25	26.45	0.65292	0.997823
GO:0051924	regulation of calcium ion transport	90	10	10.82	0.65477	0.997823
GO:0000460	maturation of 5.8S rRNA	18	2	2.16	0.65557	0.997823
GO:0001704	formation of primary germ layer	18	2	2.16	0.65557	0.997823
GO:0008542	visual learning	18	2	2.16	0.65557	0.997823
GO:0010507	negative regulation of autophagy	18	2	2.16	0.65557	0.997823
GO:0014911	positive regulation of smooth muscle cel...	18	2	2.16	0.65557	0.997823
GO:0017156	calcium-ion regulated exocytosis	18	2	2.16	0.65557	0.997823
GO:0032204	regulation of telomere maintenance	18	2	2.16	0.65557	0.997823
GO:0032418	lysosome localization	18	2	2.16	0.65557	0.997823
GO:0034502	protein localization to chromosome	18	2	2.16	0.65557	0.997823
GO:0042246	tissue regeneration	18	2	2.16	0.65557	0.997823
GO:0042475	odontogenesis of dentin-containing tooth	18	2	2.16	0.65557	0.997823
GO:0043030	regulation of macrophage activation	18	2	2.16	0.65557	0.997823
GO:0043113	receptor clustering	18	2	2.16	0.65557	0.997823
GO:0043279	response to alkaloid	18	2	2.16	0.65557	0.997823
GO:0045429	positive regulation of nitric oxide bios...	18	2	2.16	0.65557	0.997823
GO:0045576	mast cell activation	18	2	2.16	0.65557	0.997823
GO:0046626	regulation of insulin receptor signaling...	18	2	2.16	0.65557	0.997823
GO:0048168	regulation of neuronal synaptic plastici...	18	2	2.16	0.65557	0.997823
GO:0050000	chromosome localization	18	2	2.16	0.65557	0.997823
GO:0050854	regulation of antigen receptor-mediated ...	18	2	2.16	0.65557	0.997823
GO:0051303	establishment of chromosome localization	18	2	2.16	0.65557	0.997823
GO:0060113	inner ear receptor cell differentiation	18	2	2.16	0.65557	0.997823
GO:0090329	regulation of DNA-dependent DNA replicat...	18	2	2.16	0.65557	0.997823
GO:1903427	negative regulation of reactive oxygen s...	18	2	2.16	0.65557	0.997823
GO:1904888	cranial skeletal system development	18	2	2.16	0.65557	0.997823
GO:2001251	negative regulation of chromosome organi...	18	2	2.16	0.65557	0.997823
GO:0051240	positive regulation of multicellular org...	434	50	52.17	0.65594	0.997823
GO:0032940	secretion by cell	229	26	27.53	0.65659	0.997823
GO:0009306	protein secretion	99	11	11.9	0.65766	0.997823
GO:0035592	establishment of protein localization to...	99	11	11.9	0.65766	0.997823
GO:0045787	positive regulation of cell cycle	99	11	11.9	0.65766	0.997823
GO:0051090	regulation of DNA-binding transcription ...	134	15	16.11	0.65796	0.997823
GO:1903530	regulation of secretion by cell	169	19	20.32	0.66070	0.997823
GO:0032944	regulation of mononuclear cell prolifera...	55	6	6.61	0.66307	0.997823
GO:0000819	sister chromatid segregation	46	5	5.53	0.66352	0.997823
GO:0001838	embryonic epithelial tube formation	46	5	5.53	0.66352	0.997823
GO:0002700	regulation of production of molecular me...	46	5	5.53	0.66352	0.997823
GO:0009132	nucleoside diphosphate metabolic process	46	5	5.53	0.66352	0.997823
GO:0015718	monocarboxylic acid transport	46	5	5.53	0.66352	0.997823
GO:0060048	cardiac muscle contraction	46	5	5.53	0.66352	0.997823
GO:1903305	regulation of regulated secretory pathwa...	46	5	5.53	0.66352	0.997823
GO:1903825	organic acid transmembrane transport	46	5	5.53	0.66352	0.997823
GO:1905039	carboxylic acid transmembrane transport	46	5	5.53	0.66352	0.997823
GO:0051017	actin filament bundle assembly	64	7	7.69	0.66371	0.997823
GO:0019637	organophosphate metabolic process	290	33	34.86	0.66416	0.997823
GO:0006282	regulation of DNA repair	37	4	4.45	0.66580	0.997823
GO:0009185	ribonucleoside diphosphate metabolic pro...	37	4	4.45	0.66580	0.997823
GO:0046939	nucleotide phosphorylation	37	4	4.45	0.66580	0.997823
GO:0090100	positive regulation of transmembrane rec...	37	4	4.45	0.66580	0.997823
GO:0002064	epithelial cell development	82	9	9.86	0.66676	0.997823
GO:0031647	regulation of protein stability	82	9	9.86	0.66676	0.997823
GO:0044419	biological process involved in interspec...	376	43	45.2	0.66743	0.997823
GO:0001667	ameboidal-type cell migration	161	18	19.36	0.66786	0.997823
GO:0007059	chromosome segregation	91	10	10.94	0.66879	0.997823
GO:0009628	response to abiotic stimulus	282	32	33.9	0.66888	0.997823
GO:0018193	peptidyl-amino acid modification	325	37	39.07	0.66977	0.997823
GO:0030098	lymphocyte differentiation	100	11	12.02	0.67102	0.997823
GO:0006112	energy reserve metabolic process	28	3	3.37	0.67158	0.997823
GO:0006919	activation of cysteine-type endopeptidas...	28	3	3.37	0.67158	0.997823
GO:0007200	phospholipase C-activating G protein-cou...	28	3	3.37	0.67158	0.997823
GO:0008625	extrinsic apoptotic signaling pathway vi...	28	3	3.37	0.67158	0.997823
GO:0014031	mesenchymal cell development	28	3	3.37	0.67158	0.997823
GO:0035249	synaptic transmission, glutamatergic	28	3	3.37	0.67158	0.997823
GO:0045639	positive regulation of myeloid cell diff...	28	3	3.37	0.67158	0.997823
GO:0048864	stem cell development	28	3	3.37	0.67158	0.997823
GO:0051053	negative regulation of DNA metabolic pro...	28	3	3.37	0.67158	0.997823
GO:0002790	peptide secretion	109	12	13.1	0.67338	0.997823
GO:0000226	microtubule cytoskeleton organization	179	20	21.52	0.67419	0.997823
GO:0051223	regulation of protein transport	179	20	21.52	0.67419	0.997823
GO:0010608	posttranscriptional regulation of gene e...	153	17	18.39	0.67543	0.997823
GO:0120031	plasma membrane bounded cell projection ...	153	17	18.39	0.67543	0.997823
GO:0010817	regulation of hormone levels	127	14	15.27	0.67834	0.997823
GO:0030072	peptide hormone secretion	65	7	7.81	0.67997	0.997823
GO:0010810	regulation of cell-substrate adhesion	74	8	8.9	0.68027	0.997823
GO:0010950	positive regulation of endopeptidase act...	56	6	6.73	0.68054	0.997823
GO:0031345	negative regulation of cell projection o...	56	6	6.73	0.68054	0.997823
GO:0060538	skeletal muscle organ development	56	6	6.73	0.68054	0.997823
GO:1905114	cell surface receptor signaling pathway ...	136	15	16.35	0.68090	0.997823
GO:0007162	negative regulation of cell adhesion	83	9	9.98	0.68117	0.997823
GO:0043069	negative regulation of programmed cell d...	275	31	33.06	0.68188	0.997823
GO:0034612	response to tumor necrosis factor	47	5	5.65	0.68249	0.997823
GO:0071222	cellular response to lipopolysaccharide	47	5	5.65	0.68249	0.997823
GO:0002694	regulation of leukocyte activation	145	16	17.43	0.68347	0.997823
GO:0001736	establishment of planar polarity	19	2	2.28	0.68510	0.997823
GO:0001755	neural crest cell migration	19	2	2.28	0.68510	0.997823
GO:0006304	DNA modification	19	2	2.28	0.68510	0.997823
GO:0007164	establishment of tissue polarity	19	2	2.28	0.68510	0.997823
GO:0007585	respiratory gaseous exchange by respirat...	19	2	2.28	0.68510	0.997823
GO:0007632	visual behavior	19	2	2.28	0.68510	0.997823
GO:0009880	embryonic pattern specification	19	2	2.28	0.68510	0.997823
GO:0032024	positive regulation of insulin secretion	19	2	2.28	0.68510	0.997823
GO:0038084	vascular endothelial growth factor signa...	19	2	2.28	0.68510	0.997823
GO:0042440	pigment metabolic process	19	2	2.28	0.68510	0.997823
GO:0043114	regulation of vascular permeability	19	2	2.28	0.68510	0.997823
GO:0043299	leukocyte degranulation	19	2	2.28	0.68510	0.997823
GO:0048483	autonomic nervous system development	19	2	2.28	0.68510	0.997823
GO:0060294	cilium movement involved in cell motilit...	19	2	2.28	0.68510	0.997823
GO:0060395	SMAD protein signal transduction	19	2	2.28	0.68510	0.997823
GO:0060711	labyrinthine layer development	19	2	2.28	0.68510	0.997823
GO:0060997	dendritic spine morphogenesis	19	2	2.28	0.68510	0.997823
GO:0070059	intrinsic apoptotic signaling pathway in...	19	2	2.28	0.68510	0.997823
GO:0097306	cellular response to alcohol	19	2	2.28	0.68510	0.997823
GO:1904407	positive regulation of nitric oxide meta...	19	2	2.28	0.68510	0.997823
GO:2000134	negative regulation of G1/S transition o...	19	2	2.28	0.68510	0.997823
GO:2000677	regulation of transcription regulatory r...	19	2	2.28	0.68510	0.997823
GO:0050801	ion homeostasis	241	27	28.97	0.68632	0.997823
GO:0002706	regulation of lymphocyte mediated immuni...	38	4	4.57	0.68672	0.997823
GO:0006997	nucleus organization	38	4	4.57	0.68672	0.997823
GO:0009799	specification of symmetry	38	4	4.57	0.68672	0.997823
GO:0009855	determination of bilateral symmetry	38	4	4.57	0.68672	0.997823
GO:0014066	regulation of phosphatidylinositol 3-kin...	38	4	4.57	0.68672	0.997823
GO:0046165	alcohol biosynthetic process	38	4	4.57	0.68672	0.997823
GO:2000177	regulation of neural precursor cell prol...	38	4	4.57	0.68672	0.997823
GO:0043066	negative regulation of apoptotic process	267	30	32.1	0.68694	0.997823
GO:0009719	response to endogenous stimulus	396	45	47.61	0.68764	0.997823
GO:0006644	phospholipid metabolic process	119	13	14.31	0.68782	0.997823
GO:0044257	cellular protein catabolic process	198	22	23.8	0.68969	0.997823
GO:0032101	regulation of response to external stimu...	259	29	31.14	0.69217	0.997823
GO:0060560	developmental growth involved in morphog...	75	8	9.02	0.69509	0.997823
GO:0003073	regulation of systemic arterial blood pr...	29	3	3.49	0.69514	0.997823
GO:0006096	glycolytic process	29	3	3.49	0.69514	0.997823
GO:0006757	ATP generation from ADP	29	3	3.49	0.69514	0.997823
GO:0007088	regulation of mitotic nuclear division	29	3	3.49	0.69514	0.997823
GO:0007601	visual perception	29	3	3.49	0.69514	0.997823
GO:0009062	fatty acid catabolic process	29	3	3.49	0.69514	0.997823
GO:0009636	response to toxic substance	29	3	3.49	0.69514	0.997823
GO:0010717	regulation of epithelial to mesenchymal ...	29	3	3.49	0.69514	0.997823
GO:0015698	inorganic anion transport	29	3	3.49	0.69514	0.997823
GO:0016241	regulation of macroautophagy	29	3	3.49	0.69514	0.997823
GO:0030516	regulation of axon extension	29	3	3.49	0.69514	0.997823
GO:0030834	regulation of actin filament depolymeriz...	29	3	3.49	0.69514	0.997823
GO:0032755	positive regulation of interleukin-6 pro...	29	3	3.49	0.69514	0.997823
GO:0033555	multicellular organismal response to str...	29	3	3.49	0.69514	0.997823
GO:0038034	signal transduction in absence of ligand	29	3	3.49	0.69514	0.997823
GO:0042476	odontogenesis	29	3	3.49	0.69514	0.997823
GO:0042770	signal transduction in response to DNA d...	29	3	3.49	0.69514	0.997823
GO:0045428	regulation of nitric oxide biosynthetic ...	29	3	3.49	0.69514	0.997823
GO:0097061	dendritic spine organization	29	3	3.49	0.69514	0.997823
GO:0097192	extrinsic apoptotic signaling pathway in...	29	3	3.49	0.69514	0.997823
GO:0019932	second-messenger-mediated signaling	84	9	10.1	0.69519	0.997823
GO:0061572	actin filament bundle organization	66	7	7.93	0.69572	0.997823
GO:0010952	positive regulation of peptidase activit...	57	6	6.85	0.69741	0.997823
GO:0044843	cell cycle G1/S phase transition	57	6	6.85	0.69741	0.997823
GO:0048167	regulation of synaptic plasticity	57	6	6.85	0.69741	0.997823
GO:0050821	protein stabilization	57	6	6.85	0.69741	0.997823
GO:2001233	regulation of apoptotic signaling pathwa...	111	12	13.34	0.69807	0.997823
GO:0055085	transmembrane transport	389	44	46.76	0.69827	0.997823
GO:0002285	lymphocyte activation involved in immune...	48	5	5.77	0.70073	0.997823
GO:0002819	regulation of adaptive immune response	48	5	5.77	0.70073	0.997823
GO:0043244	regulation of protein-containing complex...	48	5	5.77	0.70073	0.997823
GO:0061136	regulation of proteasomal protein catabo...	48	5	5.77	0.70073	0.997823
GO:0072175	epithelial tube formation	48	5	5.77	0.70073	0.997823
GO:0006508	proteolysis	398	45	47.85	0.70108	0.997823
GO:0010876	lipid localization	138	15	16.59	0.70294	0.997823
GO:0000070	mitotic sister chromatid segregation	39	4	4.69	0.70670	0.997823
GO:0006959	humoral immune response	39	4	4.69	0.70670	0.997823
GO:0035725	sodium ion transmembrane transport	39	4	4.69	0.70670	0.997823
GO:0072006	nephron development	39	4	4.69	0.70670	0.997823
GO:1901879	regulation of protein depolymerization	39	4	4.69	0.70670	0.997823
GO:0007517	muscle organ development	94	10	11.3	0.70880	0.997823
GO:0016032	viral process	94	10	11.3	0.70880	0.997823
GO:0062197	cellular response to chemical stress	103	11	12.38	0.70922	0.997823
GO:0031346	positive regulation of cell projection o...	112	12	13.46	0.70999	0.997823
GO:0050767	regulation of neurogenesis	112	12	13.46	0.70999	0.997823
GO:0048511	rhythmic process	67	7	8.05	0.71096	0.997823
GO:0048863	stem cell differentiation	67	7	8.05	0.71096	0.997823
GO:0050807	regulation of synapse organization	67	7	8.05	0.71096	0.997823
GO:0006979	response to oxidative stress	130	14	15.63	0.71224	0.997823
GO:0000266	mitochondrial fission	20	2	2.4	0.71253	0.997823
GO:0001539	cilium or flagellum-dependent cell motil...	20	2	2.4	0.71253	0.997823
GO:0002763	positive regulation of myeloid leukocyte...	20	2	2.4	0.71253	0.997823
GO:0021510	spinal cord development	20	2	2.4	0.71253	0.997823
GO:0021675	nerve development	20	2	2.4	0.71253	0.997823
GO:0032637	interleukin-8 production	20	2	2.4	0.71253	0.997823
GO:0032677	regulation of interleukin-8 production	20	2	2.4	0.71253	0.997823
GO:0033143	regulation of intracellular steroid horm...	20	2	2.4	0.71253	0.997823
GO:0035914	skeletal muscle cell differentiation	20	2	2.4	0.71253	0.997823
GO:0043388	positive regulation of DNA binding	20	2	2.4	0.71253	0.997823
GO:0043407	negative regulation of MAP kinase activi...	20	2	2.4	0.71253	0.997823
GO:0043550	regulation of lipid kinase activity	20	2	2.4	0.71253	0.997823
GO:0048008	platelet-derived growth factor receptor ...	20	2	2.4	0.71253	0.997823
GO:0048488	synaptic vesicle endocytosis	20	2	2.4	0.71253	0.997823
GO:0051353	positive regulation of oxidoreductase ac...	20	2	2.4	0.71253	0.997823
GO:0060285	cilium-dependent cell motility	20	2	2.4	0.71253	0.997823
GO:0061035	regulation of cartilage development	20	2	2.4	0.71253	0.997823
GO:0070227	lymphocyte apoptotic process	20	2	2.4	0.71253	0.997823
GO:0071677	positive regulation of mononuclear cell ...	20	2	2.4	0.71253	0.997823
GO:0086065	cell communication involved in cardiac c...	20	2	2.4	0.71253	0.997823
GO:0140238	presynaptic endocytosis	20	2	2.4	0.71253	0.997823
GO:1903053	regulation of extracellular matrix organ...	20	2	2.4	0.71253	0.997823
GO:0032872	regulation of stress-activated MAPK casc...	58	6	6.97	0.71367	0.997823
GO:0050731	positive regulation of peptidyl-tyrosine...	58	6	6.97	0.71367	0.997823
GO:0070302	regulation of stress-activated protein k...	58	6	6.97	0.71367	0.997823
GO:0070374	positive regulation of ERK1 and ERK2 cas...	58	6	6.97	0.71367	0.997823
GO:0022603	regulation of anatomical structure morph...	331	37	39.79	0.71384	0.997823
GO:0002252	immune effector process	192	21	23.08	0.71482	0.997823
[truncated: 1,135 more rows]

## Sheet: cl2
GO.ID	Term	Annotated	Significant	Expected	classicFisher	BH
GO:0006399	tRNA metabolic process	80	28	15.86	0.00099	0.709236
GO:0010720	positive regulation of cell development	101	33	20.02	0.00143	0.709236
GO:0019722	calcium-mediated signaling	53	20	10.51	0.00182	0.709236
GO:0050654	chondroitin sulfate proteoglycan metabol...	11	7	2.18	0.00184	0.709236
GO:0099116	tRNA 5'-end processing	11	7	2.18	0.00184	0.709236
GO:0010770	positive regulation of cell morphogenesi...	29	13	5.75	0.00192	0.709236
GO:0016311	dephosphorylation	99	32	19.63	0.00204	0.709236
GO:0006082	organic acid metabolic process	293	78	58.09	0.00217	0.709236
GO:0035303	regulation of dephosphorylation	43	17	8.53	0.00221	0.709236
GO:0032885	regulation of polysaccharide biosyntheti...	14	8	2.78	0.00222	0.709236
GO:0019932	second-messenger-mediated signaling	84	28	16.65	0.00230	0.709236
GO:0034471	ncRNA 5'-end processing	12	7	2.38	0.00366	0.719979
GO:0006023	aminoglycan biosynthetic process	21	10	4.16	0.00373	0.719979
GO:0033692	cellular polysaccharide biosynthetic pro...	21	10	4.16	0.00373	0.719979
GO:1900026	positive regulation of substrate adhesio...	18	9	3.57	0.00393	0.719979
GO:0010769	regulation of cell morphogenesis involve...	38	15	7.53	0.00403	0.719979
GO:0070507	regulation of microtubule cytoskeleton o...	49	18	9.71	0.00426	0.719979
GO:0000271	polysaccharide biosynthetic process	25	11	4.96	0.00506	0.719979
GO:0046785	microtubule polymerization	25	11	4.96	0.00506	0.719979
GO:0048678	response to axon injury	25	11	4.96	0.00506	0.719979
GO:1903510	mucopolysaccharide metabolic process	25	11	4.96	0.00506	0.719979
GO:1990138	neuron projection extension	50	18	9.91	0.00545	0.719979
GO:0000904	cell morphogenesis involved in different...	219	59	43.42	0.00554	0.719979
GO:0043436	oxoacid metabolic process	285	74	56.5	0.00555	0.719979
GO:0006418	tRNA aminoacylation for protein translat...	22	10	4.36	0.00564	0.719979
GO:0001682	tRNA 5'-leader removal	10	6	1.98	0.00603	0.719979
GO:0030204	chondroitin sulfate metabolic process	10	6	1.98	0.00603	0.719979
GO:0006024	glycosaminoglycan biosynthetic process	16	8	3.17	0.00653	0.719979
GO:0032881	regulation of polysaccharide metabolic p...	16	8	3.17	0.00653	0.719979
GO:0000966	RNA 5'-end processing	13	7	2.58	0.00658	0.719979
GO:0002931	response to ischemia	13	7	2.58	0.00658	0.719979
GO:1903036	positive regulation of response to wound...	26	11	5.15	0.00723	0.761746
GO:0071805	potassium ion transmembrane transport	59	20	11.7	0.00754	0.761746
GO:0008361	regulation of cell size	63	21	12.49	0.00777	0.761746
GO:0060284	regulation of cell development	166	46	32.91	0.00786	0.761746
GO:0043039	tRNA aminoacylation	23	10	4.56	0.00824	0.776391
GO:0006022	aminoglycan metabolic process	34	13	6.74	0.00984	0.842226
GO:0031113	regulation of microtubule polymerization	17	8	3.37	0.01023	0.842226
GO:0051016	barbed-end actin filament capping	17	8	3.37	0.01023	0.842226
GO:0019752	carboxylic acid metabolic process	283	72	56.11	0.01033	0.842226
GO:0048679	regulation of axon regeneration	14	7	2.78	0.01094	0.842226
GO:0055075	potassium ion homeostasis	11	6	2.18	0.01106	0.842226
GO:0070873	regulation of glycogen metabolic process	11	6	2.18	0.01106	0.842226
GO:0098662	inorganic cation transmembrane transport	213	56	42.23	0.01149	0.842226
GO:0032886	regulation of microtubule-based process	77	24	15.27	0.01154	0.842226
GO:0035305	negative regulation of dephosphorylation	24	10	4.76	0.01167	0.842226
GO:0043038	amino acid activation	24	10	4.76	0.01167	0.842226
GO:0031109	microtubule polymerization or depolymeri...	35	13	6.94	0.01289	0.874382
GO:0031103	axon regeneration	21	9	4.16	0.01343	0.874382
GO:1903034	regulation of response to wounding	58	19	11.5	0.01348	0.874382
GO:0030203	glycosaminoglycan metabolic process	28	11	5.55	0.01368	0.874382
GO:0042180	cellular ketone metabolic process	70	22	13.88	0.01376	0.874382
GO:0055067	monovalent inorganic cation homeostasis	39	14	7.73	0.01392	0.874382
GO:0061025	membrane fusion	39	14	7.73	0.01392	0.874382
GO:0031099	regeneration	47	16	9.32	0.01534	0.918064
GO:0031400	negative regulation of protein modificat...	142	39	28.15	0.01592	0.918064
GO:0031110	regulation of microtubule polymerization...	25	10	4.96	0.01607	0.918064
GO:2000779	regulation of double-strand break repair	25	10	4.96	0.01607	0.918064
GO:0098660	inorganic ion transmembrane transport	221	57	43.82	0.01612	0.918064
GO:0016051	carbohydrate biosynthetic process	67	21	13.28	0.01639	0.918064
GO:0120036	plasma membrane bounded cell projection ...	417	100	82.67	0.01651	0.918064
GO:0032008	positive regulation of TOR signaling	15	7	2.97	0.01707	0.933894
GO:0016049	cell growth	130	36	25.77	0.01765	0.950298
GO:0048588	developmental cell growth	72	22	14.27	0.01925	0.999624
GO:0050770	regulation of axonogenesis	52	17	10.31	0.01926	0.999624
GO:0006470	protein dephosphorylation	64	20	12.69	0.01954	0.999624
GO:0030030	cell projection organization	434	103	86.05	0.02015	0.999624
GO:0006520	cellular amino acid metabolic process	85	25	16.85	0.02133	0.999624
GO:0009410	response to xenobiotic stimulus	26	10	5.15	0.02160	0.999624
GO:0034637	cellular carbohydrate biosynthetic proce...	26	10	5.15	0.02160	0.999624
GO:1900024	regulation of substrate adhesion-depende...	26	10	5.15	0.02160	0.999624
GO:0031529	ruffle organization	19	8	3.77	0.02190	0.999624
GO:0043087	regulation of GTPase activity	102	29	20.22	0.02205	0.999624
GO:0006813	potassium ion transport	69	21	13.68	0.02288	0.999624
GO:0000902	cell morphogenesis	325	79	64.43	0.02301	0.999624
GO:0008033	tRNA processing	57	18	11.3	0.02336	0.999624
GO:0032989	cellular component morphogenesis	221	56	43.82	0.02395	0.999624
GO:0030166	proteoglycan biosynthetic process	16	7	3.17	0.02526	0.999624
GO:0090317	negative regulation of intracellular pro...	16	7	3.17	0.02526	0.999624
GO:0061387	regulation of extent of cell growth	34	12	6.74	0.02529	0.999624
GO:0006805	xenobiotic metabolic process	23	9	4.56	0.02562	0.999624
GO:1900407	regulation of cellular response to oxida...	23	9	4.56	0.02562	0.999624
GO:0006281	DNA repair	142	38	28.15	0.02575	0.999624
GO:0097435	supramolecular fiber organization	249	62	49.37	0.02588	0.999624
GO:0006518	peptide metabolic process	281	69	55.71	0.02621	0.999624
GO:0048812	neuron projection morphogenesis	169	44	33.51	0.02745	0.999624
GO:0061564	axon development	134	36	26.57	0.02780	0.999624
GO:0010921	regulation of phosphatase activity	27	10	5.35	0.02838	0.999624
GO:0005978	glycogen biosynthetic process	13	6	2.58	0.02866	0.999624
GO:0009250	glucan biosynthetic process	13	6	2.58	0.02866	0.999624
GO:0010591	regulation of lamellipodium assembly	13	6	2.58	0.02866	0.999624
GO:0035308	negative regulation of protein dephospho...	13	6	2.58	0.02866	0.999624
GO:0097720	calcineurin-mediated signaling	13	6	2.58	0.02866	0.999624
GO:0099563	modification of synaptic structure	13	6	2.58	0.02866	0.999624
GO:0043001	Golgi to plasma membrane protein transpo...	20	8	3.97	0.03033	0.999624
GO:0090303	positive regulation of wound healing	20	8	3.97	0.03033	0.999624
GO:0006264	mitochondrial DNA replication	10	5	1.98	0.03150	0.999624
GO:0006884	cell volume homeostasis	10	5	1.98	0.03150	0.999624
GO:0008045	motor neuron axon guidance	10	5	1.98	0.03150	0.999624
GO:0046627	negative regulation of insulin receptor ...	10	5	1.98	0.03150	0.999624
GO:0051784	negative regulation of nuclear division	10	5	1.98	0.03150	0.999624
GO:0070131	positive regulation of mitochondrial tra...	10	5	1.98	0.03150	0.999624
GO:1901659	glycosyl compound biosynthetic process	10	5	1.98	0.03150	0.999624
GO:0034330	cell junction organization	220	55	43.62	0.03212	0.999624
GO:0007409	axonogenesis	118	32	23.39	0.03235	0.999624
GO:0009913	epidermal cell differentiation	39	13	7.73	0.03267	0.999624
GO:0034446	substrate adhesion-dependent cell spread...	39	13	7.73	0.03267	0.999624
GO:0019220	regulation of phosphate metabolic proces...	428	100	84.86	0.03283	0.999624
GO:0051493	regulation of cytoskeleton organization	180	46	35.69	0.03339	0.999624
GO:0050808	synapse organization	127	34	25.18	0.03345	0.999624
GO:0031102	neuron projection regeneration	24	9	4.76	0.03398	0.999624
GO:0051693	actin filament capping	24	9	4.76	0.03398	0.999624
GO:0071466	cellular response to xenobiotic stimulus	24	9	4.76	0.03398	0.999624
GO:0031175	neuron projection development	280	68	55.51	0.03405	0.999624
GO:0006812	cation transport	331	79	65.62	0.03468	0.999624
GO:0051174	regulation of phosphorus metabolic proce...	429	100	85.05	0.03479	0.999624
GO:0048013	ephrin receptor signaling pathway	17	7	3.37	0.03578	0.999624
GO:0070129	regulation of mitochondrial translation	17	7	3.37	0.03578	0.999624
GO:0070570	regulation of neuron projection regenera...	17	7	3.37	0.03578	0.999624
GO:1902743	regulation of lamellipodium organization	17	7	3.37	0.03578	0.999624
GO:0043043	peptide biosynthetic process	226	56	44.81	0.03613	0.999624
GO:0043254	regulation of protein-containing complex...	141	37	27.95	0.03653	0.999624
GO:0042306	regulation of protein import into nucleu...	28	10	5.55	0.03655	0.999624
GO:0048666	neuron development	318	76	63.05	0.03678	0.999624
GO:0099536	synaptic signaling	186	47	36.88	0.03815	0.999624
GO:0018107	peptidyl-threonine phosphorylation	32	11	6.34	0.03827	0.999624
GO:0048675	axon extension	32	11	6.34	0.03827	0.999624
GO:0055085	transmembrane transport	389	91	77.12	0.03953	0.999624
GO:0030216	keratinocyte differentiation	21	8	4.16	0.04073	0.999624
GO:0051289	protein homotetramerization	21	8	4.16	0.04073	0.999624
GO:0071277	cellular response to calcium ion	21	8	4.16	0.04073	0.999624
GO:0030517	negative regulation of axon extension	14	6	2.78	0.04195	0.999624
GO:0071470	cellular response to osmotic stress	14	6	2.78	0.04195	0.999624
GO:0098661	inorganic anion transmembrane transport	14	6	2.78	0.04195	0.999624
GO:1901616	organic hydroxy compound catabolic proce...	14	6	2.78	0.04195	0.999624
GO:2000781	positive regulation of double-strand bre...	14	6	2.78	0.04195	0.999624
GO:0048667	cell morphogenesis involved in neuron di...	156	40	30.93	0.04298	0.999624
GO:0030835	negative regulation of actin filament de...	25	9	4.96	0.04406	0.999624
GO:0050772	positive regulation of axonogenesis	25	9	4.96	0.04406	0.999624
GO:1902882	regulation of response to oxidative stre...	25	9	4.96	0.04406	0.999624
GO:0002064	epithelial cell development	82	23	16.26	0.04462	0.999624
GO:0032990	cell part morphogenesis	188	47	37.27	0.04516	0.999624
GO:0000226	microtubule cytoskeleton organization	179	45	35.49	0.04525	0.999624
GO:0048858	cell projection morphogenesis	179	45	35.49	0.04525	0.999624
GO:0006412	translation	220	54	43.62	0.04592	0.999624
GO:0007088	regulation of mitotic nuclear division	29	10	5.75	0.04621	0.999624
GO:0030516	regulation of axon extension	29	10	5.75	0.04621	0.999624
GO:1901653	cellular response to peptide	91	25	18.04	0.04707	0.999624
GO:0006606	protein import into nucleus	49	15	9.71	0.04750	0.999624
GO:0051170	import into nucleus	49	15	9.71	0.04750	0.999624
GO:0048813	dendrite morphogenesis	45	14	8.92	0.04801	0.999624
GO:1903828	negative regulation of cellular protein ...	41	13	8.13	0.04824	0.999624
GO:0042073	intraciliary transport	11	5	2.18	0.04853	0.999624
GO:0048668	collateral sprouting	11	5	2.18	0.04853	0.999624
GO:0048799	animal organ maturation	11	5	2.18	0.04853	0.999624
GO:0050732	negative regulation of peptidyl-tyrosine...	11	5	2.18	0.04853	0.999624
GO:1900087	positive regulation of G1/S transition o...	11	5	2.18	0.04853	0.999624
GO:1902745	positive regulation of lamellipodium org...	11	5	2.18	0.04853	0.999624
GO:1905144	response to acetylcholine	11	5	2.18	0.04853	0.999624
GO:1905145	cellular response to acetylcholine	11	5	2.18	0.04853	0.999624
GO:0017156	calcium-ion regulated exocytosis	18	7	3.57	0.04883	0.999624
GO:0062125	regulation of mitochondrial gene express...	18	7	3.57	0.04883	0.999624
GO:0098655	cation transmembrane transport	235	57	46.59	0.05045	0.999624
GO:0120039	plasma membrane bounded cell projection ...	176	44	34.89	0.05136	0.999624
GO:0003382	epithelial cell morphogenesis	22	8	4.36	0.05325	0.999624
GO:0006029	proteoglycan metabolic process	22	8	4.36	0.05325	0.999624
GO:0008347	glial cell migration	22	8	4.36	0.05325	0.999624
GO:0032387	negative regulation of intracellular tra...	22	8	4.36	0.05325	0.999624
GO:0034660	ncRNA metabolic process	181	45	35.89	0.05341	0.999624
GO:0044087	regulation of cellular component biogene...	282	67	55.91	0.05345	0.999624
GO:0001558	regulation of cell growth	114	30	22.6	0.05387	0.999624
GO:0060560	developmental growth involved in morphog...	75	21	14.87	0.05427	0.999624
GO:0034220	ion transmembrane transport	343	80	68	0.05471	0.999624
GO:0030705	cytoskeleton-dependent intracellular tra...	54	16	10.71	0.05473	0.999624
GO:2000179	positive regulation of neural precursor ...	26	9	5.15	0.05595	0.999624
GO:0050769	positive regulation of neurogenesis	71	20	14.08	0.05614	0.999624
GO:0051258	protein polymerization	110	29	21.81	0.05615	0.999624
GO:0030042	actin filament depolymerization	30	10	5.95	0.05745	0.999624
GO:0090174	organelle membrane fusion	30	10	5.95	0.05745	0.999624
GO:0050804	modulation of chemical synaptic transmis...	128	33	25.38	0.05786	0.999624
GO:0008544	epidermis development	67	19	13.28	0.05803	0.999624
GO:0018210	peptidyl-threonine modification	34	11	6.74	0.05809	0.999624
GO:0043255	regulation of carbohydrate biosynthetic ...	34	11	6.74	0.05809	0.999624
GO:0044264	cellular polysaccharide metabolic proces...	34	11	6.74	0.05809	0.999624
GO:0017158	regulation of calcium ion-dependent exoc...	15	6	2.97	0.05853	0.999624
GO:0070098	chemokine-mediated signaling pathway	15	6	2.97	0.05853	0.999624
GO:0098926	postsynaptic signal transduction	15	6	2.97	0.05853	0.999624
GO:0045216	cell-cell junction organization	80	22	15.86	0.05932	0.999624
GO:0016358	dendrite development	76	21	15.07	0.06156	0.999624
GO:0032271	regulation of protein polymerization	89	24	17.65	0.06175	0.999624
GO:0043604	amide biosynthetic process	266	63	52.74	0.06311	0.999624
GO:0055086	nucleobase-containing small molecule met...	174	43	34.5	0.06311	0.999624
GO:0071417	cellular response to organonitrogen comp...	165	41	32.71	0.06351	0.999624
GO:0099177	regulation of trans-synaptic signaling	129	33	25.58	0.06357	0.999624
GO:0034764	positive regulation of transmembrane tra...	72	20	14.27	0.06385	0.999624
GO:0034767	positive regulation of ion transmembrane...	72	20	14.27	0.06385	0.999624
GO:0045005	DNA-dependent DNA replication maintenanc...	19	7	3.77	0.06454	0.999624
GO:0048814	regulation of dendrite morphogenesis	19	7	3.77	0.06454	0.999624
GO:0060997	dendritic spine morphogenesis	19	7	3.77	0.06454	0.999624
GO:0072527	pyrimidine-containing compound metabolic...	19	7	3.77	0.06454	0.999624
GO:1903363	negative regulation of cellular protein ...	19	7	3.77	0.06454	0.999624
GO:0007010	cytoskeleton organization	450	102	89.22	0.06469	0.999624
GO:0042063	gliogenesis	107	28	21.21	0.06489	0.999624
GO:0051224	negative regulation of protein transport	51	15	10.11	0.06528	0.999624
GO:1904950	negative regulation of establishment of ...	51	15	10.11	0.06528	0.999624
GO:0006790	sulfur compound metabolic process	94	25	18.64	0.06625	0.999624
GO:0032233	positive regulation of actin filament bu...	23	8	4.56	0.06798	0.999624
GO:0005976	polysaccharide metabolic process	39	12	7.73	0.06941	0.999624
GO:0006906	vesicle fusion	27	9	5.35	0.06974	0.999624
GO:0010907	positive regulation of glucose metabolic...	12	5	2.38	0.07001	0.999624
GO:0033173	calcineurin-NFAT signaling cascade	12	5	2.38	0.07001	0.999624
GO:0043403	skeletal muscle tissue regeneration	12	5	2.38	0.07001	0.999624
GO:0043666	regulation of phosphoprotein phosphatase...	12	5	2.38	0.07001	0.999624
GO:0044331	cell-cell adhesion mediated by cadherin	12	5	2.38	0.07001	0.999624
GO:0046164	alcohol catabolic process	12	5	2.38	0.07001	0.999624
GO:0046839	phospholipid dephosphorylation	12	5	2.38	0.07001	0.999624
GO:0060055	angiogenesis involved in wound healing	12	5	2.38	0.07001	0.999624
GO:1900077	negative regulation of cellular response...	12	5	2.38	0.07001	0.999624
GO:1902808	positive regulation of cell cycle G1/S p...	12	5	2.38	0.07001	0.999624
GO:1990748	cellular detoxification	12	5	2.38	0.07001	0.999624
GO:0044272	sulfur compound biosynthetic process	35	11	6.94	0.07016	0.999624
GO:0007155	cell adhesion	390	89	77.32	0.07053	0.999624
GO:0001933	negative regulation of protein phosphory...	95	25	18.83	0.07371	0.999624
GO:0050801	ion homeostasis	241	57	47.78	0.07599	0.999624
GO:0044282	small molecule catabolic process	91	24	18.04	0.07692	0.999624
GO:0022610	biological adhesion	392	89	77.72	0.07816	0.999624
GO:0014003	oligodendrocyte development	16	6	3.17	0.07849	0.999624
GO:0097178	ruffle assembly	16	6	3.17	0.07849	0.999624
GO:0098754	detoxification	16	6	3.17	0.07849	0.999624
GO:0032787	monocarboxylic acid metabolic process	177	43	35.09	0.07953	0.999624
GO:0120035	regulation of plasma membrane bounded ce...	200	48	39.65	0.07955	0.999624
GO:1990823	response to leukemia inhibitory factor	44	13	8.72	0.08009	0.999624
GO:1990830	cellular response to leukemia inhibitory...	44	13	8.72	0.08009	0.999624
GO:0042325	regulation of phosphorylation	383	87	75.93	0.08015	0.999624
GO:0043467	regulation of generation of precursor me...	40	12	7.93	0.08205	0.999624
GO:0055076	transition metal ion homeostasis	40	12	7.93	0.08205	0.999624
GO:0006081	cellular aldehyde metabolic process	20	7	3.97	0.08296	0.999624
GO:0018198	peptidyl-cysteine modification	20	7	3.97	0.08296	0.999624
GO:0019933	cAMP-mediated signaling	20	7	3.97	0.08296	0.999624
GO:1903201	regulation of oxidative stress-induced c...	20	7	3.97	0.08296	0.999624
GO:1905521	regulation of macrophage migration	20	7	3.97	0.08296	0.999624
GO:1990868	response to chemokine	20	7	3.97	0.08296	0.999624
GO:1990869	cellular response to chemokine	20	7	3.97	0.08296	0.999624
GO:0072659	protein localization to plasma membrane	114	29	22.6	0.08311	0.999624
GO:0051962	positive regulation of nervous system de...	83	22	16.46	0.08377	0.999624
GO:0008645	hexose transmembrane transport	32	10	6.34	0.08492	0.999624
GO:0015749	monosaccharide transmembrane transport	32	10	6.34	0.08492	0.999624
GO:0034219	carbohydrate transmembrane transport	32	10	6.34	0.08492	0.999624
GO:1901880	negative regulation of protein depolymer...	32	10	6.34	0.08492	0.999624
GO:1904589	regulation of protein import	32	10	6.34	0.08492	0.999624
GO:1904659	glucose transmembrane transport	32	10	6.34	0.08492	0.999624
GO:0006970	response to osmotic stress	24	8	4.76	0.08498	0.999624
GO:0035304	regulation of protein dephosphorylation	24	8	4.76	0.08498	0.999624
GO:0031344	regulation of cell projection organizati...	201	48	39.85	0.08526	0.999624
GO:0098771	inorganic ion homeostasis	229	54	45.4	0.08617	0.999624
GO:1903530	regulation of secretion by cell	169	41	33.51	0.08680	0.999624
GO:0022008	neurogenesis	461	103	91.4	0.08703	0.999624
GO:0000280	nuclear division	119	30	23.59	0.08703	0.999624
GO:0098742	cell-cell adhesion via plasma-membrane a...	53	15	10.51	0.08706	0.999624
GO:1904064	positive regulation of cation transmembr...	53	15	10.51	0.08706	0.999624
GO:0030155	regulation of cell adhesion	220	52	43.62	0.08787	0.999624
GO:0007268	chemical synaptic transmission	174	42	34.5	0.08944	0.999624
GO:0098916	anterograde trans-synaptic signaling	174	42	34.5	0.08944	0.999624
GO:0032535	regulation of cellular component size	142	35	28.15	0.08972	0.999624
GO:0071375	cellular response to peptide hormone sti...	71	19	14.08	0.09524	0.999624
GO:0006974	cellular response to DNA damage stimulus	226	53	44.81	0.09574	0.999624
GO:0055080	cation homeostasis	226	53	44.81	0.09574	0.999624
GO:0001919	regulation of receptor recycling	13	5	2.58	0.09585	0.999624
GO:0010884	positive regulation of lipid storage	13	5	2.58	0.09585	0.999624
GO:0018023	peptidyl-lysine trimethylation	13	5	2.58	0.09585	0.999624
GO:0021799	cerebral cortex radially oriented cell m...	13	5	2.58	0.09585	0.999624
GO:0031646	positive regulation of nervous system pr...	13	5	2.58	0.09585	0.999624
GO:0031952	regulation of protein autophosphorylatio...	13	5	2.58	0.09585	0.999624
GO:0032692	negative regulation of interleukin-1 pro...	13	5	2.58	0.09585	0.999624
GO:0042491	inner ear auditory receptor cell differe...	13	5	2.58	0.09585	0.999624
GO:0043628	ncRNA 3'-end processing	13	5	2.58	0.09585	0.999624
GO:0090313	regulation of protein targeting to membr...	13	5	2.58	0.09585	0.999624
GO:1905523	positive regulation of macrophage migrat...	13	5	2.58	0.09585	0.999624
GO:1902600	proton transmembrane transport	41	12	8.13	0.09605	0.999624
GO:0099537	trans-synaptic signaling	175	42	34.7	0.09612	0.999624
GO:0080135	regulation of cellular response to stres...	189	45	37.47	0.09700	0.999624
GO:0019725	cellular homeostasis	297	68	58.88	0.09878	0.999624
GO:0006282	regulation of DNA repair	37	11	7.34	0.09878	0.999624
GO:0071901	negative regulation of protein serine/th...	37	11	7.34	0.09878	0.999624
GO:0043603	cellular amide metabolic process	354	80	70.18	0.09932	0.999624
GO:0006302	double-strand break repair	67	18	13.28	0.09940	0.999624
GO:0001843	neural tube closure	33	10	6.54	0.10120	0.999624
GO:0034440	lipid oxidation	33	10	6.54	0.10120	0.999624
GO:0060996	dendritic spine development	33	10	6.54	0.10120	0.999624
GO:0010563	negative regulation of phosphorus metabo...	139	34	27.56	0.10162	0.999624
GO:0045936	negative regulation of phosphate metabol...	139	34	27.56	0.10162	0.999624
GO:0048285	organelle fission	139	34	27.56	0.10162	0.999624
GO:1902903	regulation of supramolecular fiber organ...	139	34	27.56	0.10162	0.999624
GO:0006766	vitamin metabolic process	17	6	3.37	0.10179	0.999624
GO:0006821	chloride transport	17	6	3.37	0.10179	0.999624
GO:0007628	adult walking behavior	17	6	3.37	0.10179	0.999624
GO:0010676	positive regulation of cellular carbohyd...	17	6	3.37	0.10179	0.999624
GO:0010923	negative regulation of phosphatase activ...	17	6	3.37	0.10179	0.999624
GO:0030433	ubiquitin-dependent ERAD pathway	17	6	3.37	0.10179	0.999624
GO:0030641	regulation of cellular pH	17	6	3.37	0.10179	0.999624
GO:0052372	modulation by symbiont of entry into hos...	17	6	3.37	0.10179	0.999624
GO:0090659	walking behavior	17	6	3.37	0.10179	0.999624
GO:0030182	neuron differentiation	369	83	73.16	0.10286	0.999624
GO:0002062	chondrocyte differentiation	29	9	5.75	0.10312	0.999624
GO:0009636	response to toxic substance	29	9	5.75	0.10312	0.999624
GO:0030032	lamellipodium assembly	29	9	5.75	0.10312	0.999624
GO:0030834	regulation of actin filament depolymeriz...	29	9	5.75	0.10312	0.999624
GO:0097061	dendritic spine organization	29	9	5.75	0.10312	0.999624
GO:0034765	regulation of ion transmembrane transpor...	176	42	34.89	0.10313	0.999624
GO:0010811	positive regulation of cell-substrate ad...	50	14	9.91	0.10341	0.999624
GO:0050767	regulation of neurogenesis	112	28	22.21	0.10406	0.999624
GO:0010761	fibroblast migration	21	7	4.16	0.10407	0.999624
GO:0042446	hormone biosynthetic process	21	7	4.16	0.10407	0.999624
GO:0051055	negative regulation of lipid biosyntheti...	21	7	4.16	0.10407	0.999624
GO:0006893	Golgi to plasma membrane transport	25	8	4.96	0.10424	0.999624
GO:0030004	cellular monovalent inorganic cation hom...	25	8	4.96	0.10424	0.999624
GO:0034394	protein localization to cell surface	25	8	4.96	0.10424	0.999624
GO:0098900	regulation of action potential	25	8	4.96	0.10424	0.999624
GO:0048878	chemical homeostasis	361	81	71.57	0.11078	0.999624
GO:0032956	regulation of actin cytoskeleton organiz...	131	32	25.97	0.11123	0.999624
GO:0032970	regulation of actin filament-based proce...	154	37	30.53	0.11149	0.999624
GO:0007015	actin filament organization	168	40	33.31	0.11255	0.999624
GO:0051260	protein homooligomerization	55	15	10.9	0.11296	0.999624
GO:0051046	regulation of secretion	182	43	36.08	0.11313	0.999624
GO:0055065	metal ion homeostasis	210	49	41.63	0.11321	0.999624
GO:0045785	positive regulation of cell adhesion	136	33	26.96	0.11490	0.999624
GO:0030335	positive regulation of cell migration	201	47	39.85	0.11573	0.999624
GO:0017157	regulation of exocytosis	64	17	12.69	0.11647	0.999624
GO:0002063	chondrocyte development	10	4	1.98	0.11760	0.999624
GO:0010828	positive regulation of glucose transmemb...	10	4	1.98	0.11760	0.999624
GO:0010894	negative regulation of steroid biosynthe...	10	4	1.98	0.11760	0.999624
GO:0030194	positive regulation of blood coagulation	10	4	1.98	0.11760	0.999624
GO:0031294	lymphocyte costimulation	10	4	1.98	0.11760	0.999624
GO:0032528	microvillus organization	10	4	1.98	0.11760	0.999624
GO:0032691	negative regulation of interleukin-1 bet...	10	4	1.98	0.11760	0.999624
GO:0045920	negative regulation of exocytosis	10	4	1.98	0.11760	0.999624
GO:0045939	negative regulation of steroid metabolic...	10	4	1.98	0.11760	0.999624
GO:0095500	acetylcholine receptor signaling pathway	10	4	1.98	0.11760	0.999624
GO:1900048	positive regulation of hemostasis	10	4	1.98	0.11760	0.999624
GO:0032543	mitochondrial translation	51	14	10.11	0.11784	0.999624
GO:0034762	regulation of transmembrane transport	178	42	35.29	0.11814	0.999624
GO:0044403	biological process involved in symbiotic...	109	27	21.61	0.11878	0.999624
GO:0042177	negative regulation of protein catabolic...	34	10	6.74	0.11917	0.999624
GO:0060606	tube closure	34	10	6.74	0.11917	0.999624
GO:0098609	cell-cell adhesion	225	52	44.61	0.11974	0.999624
GO:0030029	actin filament-based process	296	67	58.69	0.12033	0.999624
GO:0000018	regulation of DNA recombination	30	9	5.95	0.12270	0.999624
GO:0031929	TOR signaling	30	9	5.95	0.12270	0.999624
GO:0048709	oligodendrocyte differentiation	30	9	5.95	0.12270	0.999624
GO:0050773	regulation of dendrite development	30	9	5.95	0.12270	0.999624
GO:0061951	establishment of protein localization to...	30	9	5.95	0.12270	0.999624
GO:0106027	neuron projection organization	30	9	5.95	0.12270	0.999624
GO:1901379	regulation of potassium ion transmembran...	30	9	5.95	0.12270	0.999624
GO:0031399	regulation of protein modification proce...	426	94	84.46	0.12501	0.999624
GO:0010827	regulation of glucose transmembrane tran...	26	8	5.15	0.12571	0.999624
GO:0032006	regulation of TOR signaling	26	8	5.15	0.12571	0.999624
GO:2001259	positive regulation of cation channel ac...	26	8	5.15	0.12571	0.999624
GO:0010569	regulation of double-strand break repair...	14	5	2.78	0.12580	0.999624
GO:0019083	viral transcription	14	5	2.78	0.12580	0.999624
GO:0033013	tetrapyrrole metabolic process	14	5	2.78	0.12580	0.999624
GO:0034198	cellular response to amino acid starvati...	14	5	2.78	0.12580	0.999624
GO:0035315	hair cell differentiation	14	5	2.78	0.12580	0.999624
GO:0046596	regulation of viral entry into host cell	14	5	2.78	0.12580	0.999624
GO:0048016	inositol phosphate-mediated signaling	14	5	2.78	0.12580	0.999624
GO:0050885	neuromuscular process controlling balanc...	14	5	2.78	0.12580	0.999624
GO:0050974	detection of mechanical stimulus involve...	14	5	2.78	0.12580	0.999624
GO:0051453	regulation of intracellular pH	14	5	2.78	0.12580	0.999624
GO:0070296	sarcoplasmic reticulum calcium ion trans...	14	5	2.78	0.12580	0.999624
GO:0071526	semaphorin-plexin signaling pathway	14	5	2.78	0.12580	0.999624
GO:1903202	negative regulation of oxidative stress-...	14	5	2.78	0.12580	0.999624
GO:1903725	regulation of phospholipid metabolic pro...	14	5	2.78	0.12580	0.999624
GO:1904646	cellular response to amyloid-beta	14	5	2.78	0.12580	0.999624
GO:1990928	response to amino acid starvation	14	5	2.78	0.12580	0.999624
GO:0043549	regulation of kinase activity	226	52	44.81	0.12692	0.999624
GO:0007272	ensheathment of neurons	56	15	11.1	0.12747	0.999624
GO:0008366	axon ensheathment	56	15	11.1	0.12747	0.999624
GO:0009141	nucleoside triphosphate metabolic proces...	56	15	11.1	0.12747	0.999624
GO:0042552	myelination	56	15	11.1	0.12747	0.999624
GO:0006749	glutathione metabolic process	22	7	4.36	0.12779	0.999624
GO:0031016	pancreas development	22	7	4.36	0.12779	0.999624
GO:0051702	biological process involved in interacti...	22	7	4.36	0.12779	0.999624
GO:0051817	modulation of process of other organism ...	22	7	4.36	0.12779	0.999624
GO:0001508	action potential	43	12	8.53	0.12808	0.999624
GO:0007416	synapse assembly	43	12	8.53	0.12808	0.999624
GO:0031644	regulation of nervous system process	43	12	8.53	0.12808	0.999624
GO:0007193	adenylate cyclase-inhibiting G protein-c...	18	6	3.57	0.12827	0.999624
GO:0010883	regulation of lipid storage	18	6	3.57	0.12827	0.999624
GO:0019080	viral gene expression	18	6	3.57	0.12827	0.999624
GO:0042102	positive regulation of T cell proliferat...	18	6	3.57	0.12827	0.999624
GO:0042246	tissue regeneration	18	6	3.57	0.12827	0.999624
GO:0046626	regulation of insulin receptor signaling...	18	6	3.57	0.12827	0.999624
GO:0051281	positive regulation of release of seques...	18	6	3.57	0.12827	0.999624
GO:0090066	regulation of anatomical structure size	189	44	37.47	0.13145	0.999624
GO:1901699	cellular response to nitrogen compound	189	44	37.47	0.13145	0.999624
GO:0010001	glial cell differentiation	83	21	16.46	0.13168	0.999624
GO:0048699	generation of neurons	413	91	81.88	0.13293	0.999624
GO:0007093	mitotic cell cycle checkpoint	39	11	7.73	0.13340	0.999624
GO:0007098	centrosome cycle	39	11	7.73	0.13340	0.999624
GO:0035725	sodium ion transmembrane transport	39	11	7.73	0.13340	0.999624
GO:1902414	protein localization to cell junction	39	11	7.73	0.13340	0.999624
GO:0007186	G protein-coupled receptor signaling pat...	171	40	33.9	0.13756	0.999624
GO:0030258	lipid modification	70	18	13.88	0.13778	0.999624
GO:0140053	mitochondrial gene expression	70	18	13.88	0.13778	0.999624
GO:0140014	mitotic nuclear division	79	20	15.66	0.13813	0.999624
GO:0032414	positive regulation of ion transmembrane...	35	10	6.94	0.13877	0.999624
GO:0043242	negative regulation of protein-containin...	35	10	6.94	0.13877	0.999624
GO:0051783	regulation of nuclear division	35	10	6.94	0.13877	0.999624
GO:0030036	actin cytoskeleton organization	261	59	51.75	0.14057	0.999624
GO:0031123	RNA 3'-end processing	31	9	6.15	0.14412	0.999624
GO:0045665	negative regulation of neuron differenti...	31	9	6.15	0.14412	0.999624
GO:0022407	regulation of cell-cell adhesion	116	28	23	0.14457	0.999624
GO:0061041	regulation of wound healing	44	12	8.72	0.14608	0.999624
GO:0006753	nucleoside phosphate metabolic process	158	37	31.33	0.14697	0.999624
GO:0007017	microtubule-based process	243	55	48.18	0.14816	0.999624
GO:0030073	insulin secretion	53	14	10.51	0.15001	0.999624
GO:0051092	positive regulation of NF-kappaB transcr...	53	14	10.51	0.15001	0.999624
GO:0044089	positive regulation of cellular componen...	163	38	32.32	0.15007	0.999624
GO:0062197	cellular response to chemical stress	103	25	20.42	0.15395	0.999624
GO:0006900	vesicle budding from membrane	23	7	4.56	0.15396	0.999624
GO:0010524	positive regulation of calcium ion trans...	23	7	4.56	0.15396	0.999624
GO:0021885	forebrain cell migration	23	7	4.56	0.15396	0.999624
GO:0022029	telencephalon cell migration	23	7	4.56	0.15396	0.999624
GO:0036503	ERAD pathway	23	7	4.56	0.15396	0.999624
GO:0045913	positive regulation of carbohydrate meta...	23	7	4.56	0.15396	0.999624
GO:1905517	macrophage migration	23	7	4.56	0.15396	0.999624
GO:2000147	positive regulation of cell motility	206	47	40.84	0.15582	0.999624
GO:0016032	viral process	94	23	18.64	0.15616	0.999624
GO:0001832	blastocyst growth	11	4	2.18	0.15707	0.999624
GO:0006743	ubiquinone metabolic process	11	4	2.18	0.15707	0.999624
GO:0006778	porphyrin-containing compound metabolic ...	11	4	2.18	0.15707	0.999624
GO:0008207	C21-steroid hormone metabolic process	11	4	2.18	0.15707	0.999624
GO:0009156	ribonucleoside monophosphate biosyntheti...	11	4	2.18	0.15707	0.999624
GO:0030212	hyaluronan metabolic process	11	4	2.18	0.15707	0.999624
GO:0031111	negative regulation of microtubule polym...	11	4	2.18	0.15707	0.999624
GO:0031112	positive regulation of microtubule polym...	11	4	2.18	0.15707	0.999624
GO:0031116	positive regulation of microtubule polym...	11	4	2.18	0.15707	0.999624
GO:0031643	positive regulation of myelination	11	4	2.18	0.15707	0.999624
GO:0031663	lipopolysaccharide-mediated signaling pa...	11	4	2.18	0.15707	0.999624
GO:0032288	myelin assembly	11	4	2.18	0.15707	0.999624
GO:0036303	lymph vessel morphogenesis	11	4	2.18	0.15707	0.999624
GO:0036475	neuron death in response to oxidative st...	11	4	2.18	0.15707	0.999624
GO:0042149	cellular response to glucose starvation	11	4	2.18	0.15707	0.999624
GO:0050775	positive regulation of dendrite morphoge...	11	4	2.18	0.15707	0.999624
GO:0051452	intracellular pH reduction	11	4	2.18	0.15707	0.999624
GO:0051930	regulation of sensory perception of pain	11	4	2.18	0.15707	0.999624
GO:0051931	regulation of sensory perception	11	4	2.18	0.15707	0.999624
GO:0086019	cell-cell signaling involved in cardiac ...	11	4	2.18	0.15707	0.999624
GO:0090030	regulation of steroid hormone biosynthet...	11	4	2.18	0.15707	0.999624
GO:0150105	protein localization to cell-cell juncti...	11	4	2.18	0.15707	0.999624
GO:1903203	regulation of oxidative stress-induced n...	11	4	2.18	0.15707	0.999624
GO:1903432	regulation of TORC1 signaling	11	4	2.18	0.15707	0.999624
GO:2000353	positive regulation of endothelial cell ...	11	4	2.18	0.15707	0.999624
GO:0050796	regulation of insulin secretion	49	13	9.71	0.15745	0.999624
GO:0051893	regulation of focal adhesion assembly	19	6	3.77	0.15768	0.999624
GO:0090109	regulation of cell-substrate junction as...	19	6	3.77	0.15768	0.999624
GO:0150116	regulation of cell-substrate junction or...	19	6	3.77	0.15768	0.999624
GO:1902003	regulation of amyloid-beta formation	19	6	3.77	0.15768	0.999624
GO:0031334	positive regulation of protein-containin...	76	19	15.07	0.15935	0.999624
GO:0001881	receptor recycling	15	5	2.97	0.15944	0.999624
GO:0051851	modulation by host of symbiont process	15	5	2.97	0.15944	0.999624
GO:0060119	inner ear receptor cell development	15	5	2.97	0.15944	0.999624
GO:0061756	leukocyte adhesion to vascular endotheli...	15	5	2.97	0.15944	0.999624
GO:0097237	cellular response to toxic substance	15	5	2.97	0.15944	0.999624
GO:0098840	protein transport along microtubule	15	5	2.97	0.15944	0.999624
GO:0099118	microtubule-based protein transport	15	5	2.97	0.15944	0.999624
GO:1901021	positive regulation of calcium ion trans...	15	5	2.97	0.15944	0.999624
GO:1990573	potassium ion import across plasma membr...	15	5	2.97	0.15944	0.999624
GO:0060491	regulation of cell projection assembly	58	15	11.5	0.15951	0.999624
GO:0120032	regulation of plasma membrane bounded ce...	58	15	11.5	0.15951	0.999624
GO:1903039	positive regulation of leukocyte cell-ce...	58	15	11.5	0.15951	0.999624
GO:1901701	cellular response to oxygen-containing c...	321	71	63.64	0.15967	0.999624
GO:0051338	regulation of transferase activity	254	57	50.36	0.15989	0.999624
GO:0055082	cellular chemical homeostasis	254	57	50.36	0.15989	0.999624
GO:0006165	nucleoside diphosphate phosphorylation	36	10	7.14	0.15995	0.999624
GO:0014020	primary neural tube formation	36	10	7.14	0.15995	0.999624
GO:0032411	positive regulation of transporter activ...	36	10	7.14	0.15995	0.999624
GO:0032612	interleukin-1 production	36	10	7.14	0.15995	0.999624
GO:0043266	regulation of potassium ion transport	36	10	7.14	0.15995	0.999624
GO:0097581	lamellipodium organization	36	10	7.14	0.15995	0.999624
GO:1990778	protein localization to cell periphery	136	32	26.96	0.16073	0.999624
GO:0070201	regulation of establishment of protein l...	183	42	36.28	0.16152	0.999624
GO:0045597	positive regulation of cell differentiat...	245	55	48.57	0.16429	0.999624
GO:0051960	regulation of nervous system development	141	33	27.95	0.16436	0.999624
GO:0040017	positive regulation of locomotion	207	47	41.04	0.16473	0.999624
GO:0032880	regulation of protein localization	293	65	58.09	0.16562	0.999624
GO:0009165	nucleotide biosynthetic process	81	20	16.06	0.16598	0.999624
GO:0050708	regulation of protein secretion	81	20	16.06	0.16598	0.999624
GO:0110053	regulation of actin filament organizatio...	104	25	20.62	0.16657	0.999624
GO:0051272	positive regulation of cellular componen...	212	48	42.03	0.16702	0.999624
GO:0019395	fatty acid oxidation	32	9	6.34	0.16728	0.999624
GO:0034404	nucleobase-containing small molecule bio...	32	9	6.34	0.16728	0.999624
GO:0120193	tight junction organization	32	9	6.34	0.16728	0.999624
GO:0032412	regulation of ion transmembrane transpor...	72	18	14.27	0.16748	0.999624
GO:0006814	sodium ion transport	54	14	10.71	0.16769	0.999624
GO:1904062	regulation of cation transmembrane trans...	118	28	23.39	0.16787	0.999624
GO:0051223	regulation of protein transport	179	41	35.49	0.16849	0.999624
GO:0009615	response to virus	86	21	17.05	0.17218	0.999624
GO:0060341	regulation of cellular localization	294	65	58.29	0.17339	0.999624
GO:0031023	microtubule organizing center organizati...	41	11	8.13	0.17371	0.999624
GO:0032231	regulation of actin filament bundle asse...	41	11	8.13	0.17371	0.999624
GO:0032272	negative regulation of protein polymeriz...	41	11	8.13	0.17371	0.999624
GO:0071356	cellular response to tumor necrosis fact...	41	11	8.13	0.17371	0.999624
GO:0009117	nucleotide metabolic process	156	36	30.93	0.17443	0.999624
GO:0009408	response to heat	28	8	5.55	0.17480	0.999624
GO:0019935	cyclic-nucleotide-mediated signaling	28	8	5.55	0.17480	0.999624
GO:1904427	positive regulation of calcium ion trans...	28	8	5.55	0.17480	0.999624
GO:1901652	response to peptide	114	27	22.6	0.17592	0.999624
GO:0010035	response to inorganic substance	128	30	25.38	0.17608	0.999624
GO:0007188	adenylate cyclase-modulating G protein-c...	50	13	9.91	0.17643	0.999624
GO:0030307	positive regulation of cell growth	50	13	9.91	0.17643	0.999624
GO:0006897	endocytosis	161	37	31.92	0.17754	0.999624
GO:0044262	cellular carbohydrate metabolic process	91	22	18.04	0.17799	0.999624
GO:0006310	DNA recombination	82	20	16.26	0.18095	0.999624
GO:1903047	mitotic cell cycle process	204	46	40.45	0.18111	0.999624
GO:0090087	regulation of peptide transport	185	42	36.68	0.18117	0.999624
GO:0036473	cell death in response to oxidative stre...	24	7	4.76	0.18236	0.999624
GO:0050810	regulation of steroid biosynthetic proce...	24	7	4.76	0.18236	0.999624
GO:0099024	plasma membrane invagination	24	7	4.76	0.18236	0.999624
GO:0008643	carbohydrate transport	37	10	7.34	0.18260	0.999624
GO:0046939	nucleotide phosphorylation	37	10	7.34	0.18260	0.999624
GO:1903959	regulation of anion transmembrane transp...	37	10	7.34	0.18260	0.999624
GO:0032870	cellular response to hormone stimulus	138	32	27.36	0.18358	0.999624
GO:0001932	regulation of protein phosphorylation	334	73	66.22	0.18468	0.999624
GO:0046890	regulation of lipid biosynthetic process	55	14	10.9	0.18638	0.999624
GO:0002791	regulation of peptide secretion	87	21	17.25	0.18701	0.999624
GO:0001836	release of cytochrome c from mitochondri...	20	6	3.97	0.18970	0.999624
GO:0021795	cerebral cortex cell migration	20	6	3.97	0.18970	0.999624
GO:0050771	negative regulation of axonogenesis	20	6	3.97	0.18970	0.999624
GO:0061512	protein localization to cilium	20	6	3.97	0.18970	0.999624
GO:0070301	cellular response to hydrogen peroxide	20	6	3.97	0.18970	0.999624
GO:0085029	extracellular matrix assembly	20	6	3.97	0.18970	0.999624
GO:1901606	alpha-amino acid catabolic process	20	6	3.97	0.18970	0.999624
GO:1903053	regulation of extracellular matrix organ...	20	6	3.97	0.18970	0.999624
GO:0032652	regulation of interleukin-1 production	33	9	6.54	0.19206	0.999624
GO:1903362	regulation of cellular protein catabolic...	69	17	13.68	0.19316	0.999624
GO:0009611	response to wounding	153	35	30.33	0.19367	0.999624
GO:0120031	plasma membrane bounded cell projection ...	153	35	30.33	0.19367	0.999624
GO:0045859	regulation of protein kinase activity	191	43	37.87	0.19398	0.999624
GO:0001945	lymph vessel development	16	5	3.17	0.19623	0.999624
GO:0006220	pyrimidine nucleotide metabolic process	16	5	3.17	0.19623	0.999624
GO:0006303	double-strand break repair via nonhomolo...	16	5	3.17	0.19623	0.999624
GO:0006356	regulation of transcription by RNA polym...	16	5	3.17	0.19623	0.999624
GO:0007606	sensory perception of chemical stimulus	16	5	3.17	0.19623	0.999624
GO:0030199	collagen fibril organization	16	5	3.17	0.19623	0.999624
GO:0030219	megakaryocyte differentiation	16	5	3.17	0.19623	0.999624
GO:0043277	apoptotic cell clearance	16	5	3.17	0.19623	0.999624
GO:0044818	mitotic G2/M transition checkpoint	16	5	3.17	0.19623	0.999624
GO:1904037	positive regulation of epithelial cell a...	16	5	3.17	0.19623	0.999624
GO:1904645	response to amyloid-beta	16	5	3.17	0.19623	0.999624
GO:0002685	regulation of leukocyte migration	74	18	14.67	0.20027	0.999624
GO:0010810	regulation of cell-substrate adhesion	74	18	14.67	0.20027	0.999624
GO:0043547	positive regulation of GTPase activity	74	18	14.67	0.20027	0.999624
GO:0000002	mitochondrial genome maintenance	12	4	2.38	0.20059	0.999624
GO:0002686	negative regulation of leukocyte migrati...	12	4	2.38	0.20059	0.999624
GO:0007091	metaphase/anaphase transition of mitotic...	12	4	2.38	0.20059	0.999624
GO:0010965	regulation of mitotic sister chromatid s...	12	4	2.38	0.20059	0.999624
GO:0030071	regulation of mitotic metaphase/anaphase...	12	4	2.38	0.20059	0.999624
GO:0032392	DNA geometric change	12	4	2.38	0.20059	0.999624
GO:0032508	DNA duplex unwinding	12	4	2.38	0.20059	0.999624
GO:0034331	cell junction maintenance	12	4	2.38	0.20059	0.999624
GO:0038202	TORC1 signaling	12	4	2.38	0.20059	0.999624
GO:0039694	viral RNA genome replication	12	4	2.38	0.20059	0.999624
GO:0043949	regulation of cAMP-mediated signaling	12	4	2.38	0.20059	0.999624
GO:0045773	positive regulation of axon extension	12	4	2.38	0.20059	0.999624
GO:0045851	pH reduction	12	4	2.38	0.20059	0.999624
GO:0046885	regulation of hormone biosynthetic proce...	12	4	2.38	0.20059	0.999624
GO:0046931	pore complex assembly	12	4	2.38	0.20059	0.999624
GO:0050820	positive regulation of coagulation	12	4	2.38	0.20059	0.999624
GO:0060122	inner ear receptor cell stereocilium org...	12	4	2.38	0.20059	0.999624
GO:0061001	regulation of dendritic spine morphogene...	12	4	2.38	0.20059	0.999624
GO:0098930	axonal transport	12	4	2.38	0.20059	0.999624
GO:0150076	neuroinflammatory response	12	4	2.38	0.20059	0.999624
GO:2000008	regulation of protein localization to ce...	12	4	2.38	0.20059	0.999624
GO:0006096	glycolytic process	29	8	5.75	0.20210	0.999624
GO:0006757	ATP generation from ADP	29	8	5.75	0.20210	0.999624
GO:0015698	inorganic anion transport	29	8	5.75	0.20210	0.999624
GO:0045621	positive regulation of lymphocyte differ...	29	8	5.75	0.20210	0.999624
GO:0061178	regulation of insulin secretion involved...	29	8	5.75	0.20210	0.999624
GO:0062012	regulation of small molecule metabolic p...	102	24	20.22	0.20295	0.999624
GO:0030072	peptide hormone secretion	65	16	12.89	0.20350	0.999624
GO:0010243	response to organonitrogen compound	240	53	47.58	0.20531	0.999624
GO:0048639	positive regulation of developmental gro...	56	14	11.1	0.20602	0.999624
GO:0050954	sensory perception of mechanical stimulu...	56	14	11.1	0.20602	0.999624
GO:1901605	alpha-amino acid metabolic process	56	14	11.1	0.20602	0.999624
GO:0006694	steroid biosynthetic process	38	10	7.53	0.20662	0.999624
GO:0009145	purine nucleoside triphosphate biosynthe...	38	10	7.53	0.20662	0.999624
GO:0009206	purine ribonucleoside triphosphate biosy...	38	10	7.53	0.20662	0.999624
GO:0010906	regulation of glucose metabolic process	38	10	7.53	0.20662	0.999624
GO:0051592	response to calcium ion	38	10	7.53	0.20662	0.999624
GO:2000177	regulation of neural precursor cell prol...	38	10	7.53	0.20662	0.999624
GO:0016050	vesicle organization	79	19	15.66	0.20682	0.999624
GO:0048284	organelle fusion	47	12	9.32	0.20735	0.999624
GO:0034504	protein localization to nucleus	93	22	18.44	0.20793	0.999624
GO:0044782	cilium organization	93	22	18.44	0.20793	0.999624
GO:0010975	regulation of neuron projection developm...	140	32	27.76	0.20807	0.999624
GO:0065003	protein-containing complex assembly	459	98	91	0.21030	0.999624
GO:0034329	cell junction assembly	126	29	24.98	0.21032	0.999624
GO:0031346	positive regulation of cell projection o...	112	26	22.21	0.21206	0.999624
GO:0010324	membrane invagination	25	7	4.96	0.21274	0.999624
GO:0032526	response to retinoic acid	25	7	4.96	0.21274	0.999624
GO:0044773	mitotic DNA damage checkpoint	25	7	4.96	0.21274	0.999624
GO:0045685	regulation of glial cell differentiation	25	7	4.96	0.21274	0.999624
GO:0046718	viral entry into host cell	25	7	4.96	0.21274	0.999624
GO:0050435	amyloid-beta metabolic process	25	7	4.96	0.21274	0.999624
GO:0050871	positive regulation of B cell activation	25	7	4.96	0.21274	0.999624
GO:0055072	iron ion homeostasis	25	7	4.96	0.21274	0.999624
GO:0060291	long-term synaptic potentiation	25	7	4.96	0.21274	0.999624
GO:0008154	actin polymerization or depolymerization	84	20	16.65	0.21288	0.999624
GO:1901293	nucleoside phosphate biosynthetic proces...	84	20	16.65	0.21288	0.999624
GO:0006259	DNA metabolic process	241	53	47.78	0.21504	0.999624
GO:1901698	response to nitrogen compound	270	59	53.53	0.21555	0.999624
GO:0043624	cellular protein complex disassembly	52	13	10.31	0.21751	0.999624
GO:0099173	postsynapse organization	52	13	10.31	0.21751	0.999624
GO:0044283	small molecule biosynthetic process	198	44	39.26	0.21765	0.999624
GO:0017038	protein import	75	18	14.87	0.21773	0.999624
GO:0022409	positive regulation of cell-cell adhesio...	75	18	14.87	0.21773	0.999624
GO:0022898	regulation of transmembrane transporter ...	75	18	14.87	0.21773	0.999624
GO:0033500	carbohydrate homeostasis	75	18	14.87	0.21773	0.999624
GO:0042593	glucose homeostasis	75	18	14.87	0.21773	0.999624
GO:0046031	ADP metabolic process	34	9	6.74	0.21830	0.999624
GO:0001889	liver development	43	11	8.53	0.21910	0.999624
GO:0061008	hepaticobiliary system development	43	11	8.53	0.21910	0.999624
GO:0006873	cellular ion homeostasis	203	45	40.25	0.21987	0.999624
GO:0022604	regulation of cell morphogenesis	122	28	24.19	0.22019	0.999624
GO:0061572	actin filament bundle organization	66	16	13.09	0.22235	0.999624
GO:0033043	regulation of organelle organization	363	78	71.97	0.22254	0.999624
GO:0043269	regulation of ion transport	407	87	80.69	0.22336	0.999624
GO:0010817	regulation of hormone levels	127	29	25.18	0.22394	0.999624
GO:0006289	nucleotide-excision repair	21	6	4.16	0.22395	0.999624
GO:0046323	glucose import	21	6	4.16	0.22395	0.999624
GO:0008202	steroid metabolic process	80	19	15.86	0.22398	0.999624
GO:0006109	regulation of carbohydrate metabolic pro...	57	14	11.3	0.22654	0.999624
GO:0048167	regulation of synaptic plasticity	57	14	11.3	0.22654	0.999624
GO:0048771	tissue remodeling	57	14	11.3	0.22654	0.999624
GO:0090276	regulation of peptide hormone secretion	57	14	11.3	0.22654	0.999624
GO:0019216	regulation of lipid metabolic process	113	26	22.4	0.22659	0.999624
GO:0051094	positive regulation of developmental pro...	383	82	75.93	0.22662	0.999624
GO:0080134	regulation of response to stress	354	76	70.18	0.22876	0.999624
GO:0030833	regulation of actin filament polymerizat...	71	17	14.08	0.22940	0.999624
GO:0034976	response to endoplasmic reticulum stress	71	17	14.08	0.22940	0.999624
GO:0050730	regulation of peptidyl-tyrosine phosphor...	71	17	14.08	0.22940	0.999624
GO:0010675	regulation of cellular carbohydrate meta...	48	12	9.52	0.22994	0.999624
GO:1901991	negative regulation of mitotic cell cycl...	48	12	9.52	0.22994	0.999624
GO:0032611	interleukin-1 beta production	30	8	5.95	0.23097	0.999624
GO:0035773	insulin secretion involved in cellular r...	30	8	5.95	0.23097	0.999624
GO:0042542	response to hydrogen peroxide	30	8	5.95	0.23097	0.999624
GO:0051262	protein tetramerization	30	8	5.95	0.23097	0.999624
GO:0120192	tight junction assembly	30	8	5.95	0.23097	0.999624
GO:0001952	regulation of cell-matrix adhesion	39	10	7.73	0.23187	0.999624
GO:0009201	ribonucleoside triphosphate biosynthetic...	39	10	7.73	0.23187	0.999624
GO:1901879	regulation of protein depolymerization	39	10	7.73	0.23187	0.999624
GO:0043434	response to peptide hormone	90	21	17.84	0.23512	0.999624
GO:0000726	non-recombinational repair	17	5	3.37	0.23558	0.999624
GO:0007131	reciprocal meiotic recombination	17	5	3.37	0.23558	0.999624
GO:0010762	regulation of fibroblast migration	17	5	3.37	0.23558	0.999624
GO:0032663	regulation of interleukin-2 production	17	5	3.37	0.23558	0.999624
GO:0034332	adherens junction organization	17	5	3.37	0.23558	0.999624
GO:0035825	homologous recombination	17	5	3.37	0.23558	0.999624
GO:0045687	positive regulation of glial cell differ...	17	5	3.37	0.23558	0.999624
GO:0046324	regulation of glucose import	17	5	3.37	0.23558	0.999624
GO:0050982	detection of mechanical stimulus	17	5	3.37	0.23558	0.999624
GO:0070936	protein K48-linked ubiquitination	17	5	3.37	0.23558	0.999624
GO:0140527	reciprocal homologous recombination	17	5	3.37	0.23558	0.999624
GO:1905476	negative regulation of protein localizat...	17	5	3.37	0.23558	0.999624
GO:0071345	cellular response to cytokine stimulus	219	48	43.42	0.23682	0.999624
GO:0000278	mitotic cell cycle	248	54	49.17	0.23684	0.999624
GO:0140352	export from cell	248	54	49.17	0.23684	0.999624
GO:0031333	negative regulation of protein-containin...	53	13	10.51	0.23944	0.999624
GO:0030003	cellular cation homeostasis	200	44	39.65	0.24001	0.999624
GO:0016053	organic acid biosynthetic process	95	22	18.83	0.24009	0.999624
GO:0046394	carboxylic acid biosynthetic process	95	22	18.83	0.24009	0.999624
GO:0031589	cell-substrate adhesion	114	26	22.6	0.24156	0.999624
GO:0033157	regulation of intracellular protein tran...	81	19	16.06	0.24176	0.999624
GO:0030031	cell projection assembly	157	35	31.13	0.24289	0.999624
GO:0010970	transport along microtubule	44	11	8.72	0.24344	0.999624
GO:0001676	long-chain fatty acid metabolic process	26	7	5.15	0.24481	0.999624
GO:0005977	glycogen metabolic process	26	7	5.15	0.24481	0.999624
GO:0006073	cellular glucan metabolic process	26	7	5.15	0.24481	0.999624
GO:0009791	post-embryonic development	26	7	5.15	0.24481	0.999624
GO:0030193	regulation of blood coagulation	26	7	5.15	0.24481	0.999624
GO:0030865	cortical cytoskeleton organization	26	7	5.15	0.24481	0.999624
GO:0035821	modulation of process of other organism	26	7	5.15	0.24481	0.999624
GO:0044042	glucan metabolic process	26	7	5.15	0.24481	0.999624
GO:0051963	regulation of synapse assembly	26	7	5.15	0.24481	0.999624
GO:0008037	cell recognition	35	9	6.94	0.24583	0.999624
GO:0009135	purine nucleoside diphosphate metabolic ...	35	9	6.94	0.24583	0.999624
GO:0009179	purine ribonucleoside diphosphate metabo...	35	9	6.94	0.24583	0.999624
GO:0042982	amyloid precursor protein metabolic proc...	35	9	6.94	0.24583	0.999624
GO:0045833	negative regulation of lipid metabolic p...	35	9	6.94	0.24583	0.999624
GO:0051336	regulation of hydrolase activity	278	60	55.12	0.24585	0.999624
GO:0001774	microglial cell activation	13	4	2.58	0.24715	0.999624
GO:0007215	glutamate receptor signaling pathway	13	4	2.58	0.24715	0.999624
GO:0009124	nucleoside monophosphate biosynthetic pr...	13	4	2.58	0.24715	0.999624
GO:0031297	replication fork processing	13	4	2.58	0.24715	0.999624
GO:0032735	positive regulation of interleukin-12 pr...	13	4	2.58	0.24715	0.999624
GO:0044784	metaphase/anaphase transition of cell cy...	13	4	2.58	0.24715	0.999624
GO:0045022	early endosome to late endosome transpor...	13	4	2.58	0.24715	0.999624
GO:0046039	GTP metabolic process	13	4	2.58	0.24715	0.999624
GO:0050856	regulation of T cell receptor signaling ...	13	4	2.58	0.24715	0.999624
GO:1902099	regulation of metaphase/anaphase transit...	13	4	2.58	0.24715	0.999624
GO:2001244	positive regulation of intrinsic apoptot...	13	4	2.58	0.24715	0.999624
GO:0006261	DNA-dependent DNA replication	58	14	11.5	0.24787	0.999624
GO:0006469	negative regulation of protein kinase ac...	58	14	11.5	0.24787	0.999624
GO:1901888	regulation of cell junction assembly	58	14	11.5	0.24787	0.999624
GO:0098656	anion transmembrane transport	124	28	24.58	0.24896	0.999624
GO:0007059	chromosome segregation	91	21	18.04	0.25225	0.999624
GO:0006091	generation of precursor metabolites and ...	177	39	35.09	0.25293	0.999624
GO:0009144	purine nucleoside triphosphate metabolic...	49	12	9.71	0.25345	0.999624
GO:0042445	hormone metabolic process	49	12	9.71	0.25345	0.999624
GO:0050792	regulation of viral process	49	12	9.71	0.25345	0.999624
GO:0050870	positive regulation of T cell activation	49	12	9.71	0.25345	0.999624
GO:1900180	regulation of protein localization to nu...	49	12	9.71	0.25345	0.999624
GO:1902107	positive regulation of leukocyte differe...	49	12	9.71	0.25345	0.999624
GO:1903708	positive regulation of hemopoiesis	49	12	9.71	0.25345	0.999624
GO:0030041	actin filament polymerization	77	18	15.27	0.25457	0.999624
GO:0032409	regulation of transporter activity	77	18	15.27	0.25457	0.999624
GO:0007411	axon guidance	63	15	12.49	0.25539	0.999624
GO:0010721	negative regulation of cell development	63	15	12.49	0.25539	0.999624
GO:0072330	monocarboxylic acid biosynthetic process	63	15	12.49	0.25539	0.999624
GO:0097485	neuron projection guidance	63	15	12.49	0.25539	0.999624
GO:0042326	negative regulation of phosphorylation	115	26	22.8	0.25695	0.999624
GO:0007169	transmembrane receptor protein tyrosine ...	187	41	37.07	0.25736	0.999624
GO:0016192	vesicle-mediated transport	426	90	84.46	0.25812	0.999624
GO:0001841	neural tube formation	40	10	7.93	0.25821	0.999624
GO:0006090	pyruvate metabolic process	40	10	7.93	0.25821	0.999624
GO:0010927	cellular component assembly involved in ...	40	10	7.93	0.25821	0.999624
GO:0070252	actin-mediated cell contraction	40	10	7.93	0.25821	0.999624
GO:1903364	positive regulation of cellular protein ...	40	10	7.93	0.25821	0.999624
GO:0006635	fatty acid beta-oxidation	22	6	4.36	0.26001	0.999624
GO:0006885	regulation of pH	22	6	4.36	0.26001	0.999624
GO:0008088	axo-dendritic transport	22	6	4.36	0.26001	0.999624
GO:0043507	positive regulation of JUN kinase activi...	22	6	4.36	0.26001	0.999624
GO:0051298	centrosome duplication	22	6	4.36	0.26001	0.999624
GO:0051304	chromosome separation	22	6	4.36	0.26001	0.999624
GO:0061097	regulation of protein tyrosine kinase ac...	22	6	4.36	0.26001	0.999624
GO:0072577	endothelial cell apoptotic process	22	6	4.36	0.26001	0.999624
GO:0086001	cardiac muscle cell action potential	22	6	4.36	0.26001	0.999624
GO:1900076	regulation of cellular response to insul...	22	6	4.36	0.26001	0.999624
GO:2000351	regulation of endothelial cell apoptotic...	22	6	4.36	0.26001	0.999624
GO:0044093	positive regulation of molecular functio...	446	94	88.42	0.26097	0.999624
GO:0001959	regulation of cytokine-mediated signalin...	31	8	6.15	0.26118	0.999624
GO:0007029	endoplasmic reticulum organization	31	8	6.15	0.26118	0.999624
GO:0009116	nucleoside metabolic process	31	8	6.15	0.26118	0.999624
GO:0090630	activation of GTPase activity	31	8	6.15	0.26118	0.999624
GO:0045055	regulated exocytosis	68	16	13.48	0.26216	0.999624
GO:0046883	regulation of hormone secretion	68	16	13.48	0.26216	0.999624
GO:0051494	negative regulation of cytoskeleton orga...	68	16	13.48	0.26216	0.999624
GO:0007043	cell-cell junction assembly	54	13	10.71	0.26219	0.999624
GO:0043903	regulation of biological process involve...	54	13	10.71	0.26219	0.999624
GO:0030198	extracellular matrix organization	106	24	21.02	0.26535	0.999624
GO:0043062	extracellular structure organization	106	24	21.02	0.26535	0.999624
GO:0045229	external encapsulating structure organiz...	106	24	21.02	0.26535	0.999624
GO:0060627	regulation of vesicle-mediated transport	178	39	35.29	0.26554	0.999624
GO:0040007	growth	280	60	55.51	0.26596	0.999624
GO:0006979	response to oxidative stress	130	29	25.77	0.26712	0.999624
GO:0051251	positive regulation of lymphocyte activa...	73	17	14.47	0.26828	0.999624
GO:0072522	purine-containing compound biosynthetic ...	73	17	14.47	0.26828	0.999624
GO:0009205	purine ribonucleoside triphosphate metab...	45	11	8.92	0.26871	0.999624
GO:0051261	protein depolymerization	45	11	8.92	0.26871	0.999624
GO:1903531	negative regulation of secretion by cell	45	11	8.92	0.26871	0.999624
GO:0007267	cell-cell signaling	388	82	76.93	0.26904	0.999624
GO:0006468	protein phosphorylation	447	94	88.62	0.26919	0.999624
GO:0032869	cellular response to insulin stimulus	59	14	11.7	0.26992	0.999624
GO:1903792	negative regulation of anion transport	78	18	15.46	0.27385	0.999624
GO:0021543	pallium development	36	9	7.14	0.27445	0.999624
GO:0032386	regulation of intracellular transport	121	27	23.99	0.27608	0.999624
GO:0051017	actin filament bundle assembly	64	15	12.69	0.27681	0.999624
GO:0010656	negative regulation of muscle cell apopt...	18	5	3.57	0.27686	0.999624
GO:0014855	striated muscle cell proliferation	18	5	3.57	0.27686	0.999624
GO:0032615	interleukin-12 production	18	5	3.57	0.27686	0.999624
GO:0032655	regulation of interleukin-12 production	18	5	3.57	0.27686	0.999624
GO:0034502	protein localization to chromosome	18	5	3.57	0.27686	0.999624
GO:0034605	cellular response to heat	18	5	3.57	0.27686	0.999624
GO:0043030	regulation of macrophage activation	18	5	3.57	0.27686	0.999624
GO:0043279	response to alkaloid	18	5	3.57	0.27686	0.999624
GO:0048168	regulation of neuronal synaptic plastici...	18	5	3.57	0.27686	0.999624
GO:0051496	positive regulation of stress fiber asse...	18	5	3.57	0.27686	0.999624
GO:0060113	inner ear receptor cell differentiation	18	5	3.57	0.27686	0.999624
GO:0071867	response to monoamine	18	5	3.57	0.27686	0.999624
GO:0071868	cellular response to monoamine stimulus	18	5	3.57	0.27686	0.999624
GO:0071869	response to catecholamine	18	5	3.57	0.27686	0.999624
GO:0071870	cellular response to catecholamine stimu...	18	5	3.57	0.27686	0.999624
GO:0090329	regulation of DNA-dependent DNA replicat...	18	5	3.57	0.27686	0.999624
GO:0001678	cellular glucose homeostasis	50	12	9.91	0.27777	0.999624
GO:0002028	regulation of sodium ion transport	27	7	5.35	0.27825	0.999624
GO:0032651	regulation of interleukin-1 beta product...	27	7	5.35	0.27825	0.999624
GO:0044409	entry into host	27	7	5.35	0.27825	0.999624
GO:0044774	mitotic DNA integrity checkpoint	27	7	5.35	0.27825	0.999624
GO:0050671	positive regulation of lymphocyte prolif...	27	7	5.35	0.27825	0.999624
GO:1900046	regulation of hemostasis	27	7	5.35	0.27825	0.999624
GO:1901800	positive regulation of proteasomal prote...	27	7	5.35	0.27825	0.999624
GO:0033674	positive regulation of kinase activity	150	33	29.74	0.27833	0.999624
GO:0034470	ncRNA processing	150	33	29.74	0.27833	0.999624
GO:0023061	signal release	131	29	25.97	0.28222	0.999624
GO:1902905	positive regulation of supramolecular fi...	69	16	13.68	0.28299	0.999624
GO:0034622	cellular protein-containing complex asse...	321	68	63.64	0.28483	0.999624
GO:0000724	double-strand break repair via homologou...	41	10	8.13	0.28546	0.999624
GO:0000725	recombinational repair	41	10	8.13	0.28546	0.999624
GO:0051928	positive regulation of calcium ion trans...	41	10	8.13	0.28546	0.999624
GO:0071248	cellular response to metal ion	41	10	8.13	0.28546	0.999624
GO:0044772	mitotic cell cycle phase transition	112	25	22.21	0.28556	0.999624
GO:0051480	regulation of cytosolic calcium ion conc...	112	25	22.21	0.28556	0.999624
GO:0061351	neural precursor cell proliferation	55	13	10.9	0.28566	0.999624
GO:0022402	cell cycle process	326	69	64.63	0.28577	0.999624
GO:0051347	positive regulation of transferase activ...	175	38	34.7	0.28957	0.999624
GO:0035924	cellular response to vascular endothelia...	32	8	6.34	0.29249	0.999624
GO:0006875	cellular metal ion homeostasis	185	40	36.68	0.29340	0.999624
GO:0051091	positive regulation of DNA-binding trans...	79	18	15.66	0.29363	0.999624
GO:0009132	nucleoside diphosphate metabolic process	46	11	9.12	0.29478	0.999624
GO:0009199	ribonucleoside triphosphate metabolic pr...	46	11	9.12	0.29478	0.999624
GO:0071333	cellular response to glucose stimulus	46	11	9.12	0.29478	0.999624
GO:1903305	regulation of regulated secretory pathwa...	46	11	9.12	0.29478	0.999624
GO:0032940	secretion by cell	229	49	45.4	0.29536	0.999624
GO:0006636	unsaturated fatty acid biosynthetic proc...	14	4	2.78	0.29568	0.999624
GO:0010824	regulation of centrosome duplication	14	4	2.78	0.29568	0.999624
GO:0018345	protein palmitoylation	14	4	2.78	0.29568	0.999624
GO:0045601	regulation of endothelial cell different...	14	4	2.78	0.29568	0.999624
GO:0045933	positive regulation of muscle contractio...	14	4	2.78	0.29568	0.999624
GO:0046605	regulation of centrosome cycle	14	4	2.78	0.29568	0.999624
GO:0051306	mitotic sister chromatid separation	14	4	2.78	0.29568	0.999624
GO:0060421	positive regulation of heart growth	14	4	2.78	0.29568	0.999624
GO:0071300	cellular response to retinoic acid	14	4	2.78	0.29568	0.999624
GO:0071604	transforming growth factor beta producti...	14	4	2.78	0.29568	0.999624
GO:0071634	regulation of transforming growth factor...	14	4	2.78	0.29568	0.999624
GO:0086009	membrane repolarization	14	4	2.78	0.29568	0.999624
GO:0098801	regulation of renal system process	14	4	2.78	0.29568	0.999624
GO:0098901	regulation of cardiac muscle cell action...	14	4	2.78	0.29568	0.999624
GO:0098927	vesicle-mediated transport between endos...	14	4	2.78	0.29568	0.999624
GO:1900271	regulation of long-term synaptic potenti...	14	4	2.78	0.29568	0.999624
GO:1901661	quinone metabolic process	14	4	2.78	0.29568	0.999624
GO:0034205	amyloid-beta formation	23	6	4.56	0.29745	0.999624
GO:0045739	positive regulation of DNA repair	23	6	4.56	0.29745	0.999624
GO:0046128	purine ribonucleoside metabolic process	23	6	4.56	0.29745	0.999624
GO:0061640	cytoskeleton-dependent cytokinesis	23	6	4.56	0.29745	0.999624
GO:1902991	regulation of amyloid precursor protein ...	23	6	4.56	0.29745	0.999624
GO:0046034	ATP metabolic process	132	29	26.17	0.29763	0.999624
GO:0034248	regulation of cellular amide metabolic p...	137	30	27.16	0.30023	0.999624
GO:0042327	positive regulation of phosphorylation	254	54	50.36	0.30177	0.999624
GO:0006417	regulation of translation	113	25	22.4	0.30232	0.999624
GO:0030308	negative regulation of cell growth	51	12	10.11	0.30278	0.999624
GO:0050921	positive regulation of chemotaxis	51	12	10.11	0.30278	0.999624
GO:1901988	negative regulation of cell cycle phase ...	51	12	10.11	0.30278	0.999624
GO:2001257	regulation of cation channel activity	51	12	10.11	0.30278	0.999624
GO:0008637	apoptotic mitochondrial changes	37	9	7.34	0.30397	0.999624
GO:0009185	ribonucleoside diphosphate metabolic pro...	37	9	7.34	0.30397	0.999624
GO:0030837	negative regulation of actin filament po...	37	9	7.34	0.30397	0.999624
GO:0098876	vesicle-mediated transport to the plasma...	37	9	7.34	0.30397	0.999624
GO:0010948	negative regulation of cell cycle proces...	70	16	13.88	0.30434	0.999624
GO:0001819	positive regulation of cytokine producti...	123	27	24.39	0.30816	0.999624
GO:0031345	negative regulation of cell projection o...	56	13	11.1	0.30974	0.999624
GO:0009306	protein secretion	99	22	19.63	0.31002	0.999624
GO:0035592	establishment of protein localization to...	99	22	19.63	0.31002	0.999624
GO:0072657	protein localization to membrane	201	43	39.85	0.31137	0.999624
GO:0006112	energy reserve metabolic process	28	7	5.55	0.31273	0.999624
GO:0008585	female gonad development	28	7	5.55	0.31273	0.999624
GO:0032946	positive regulation of mononuclear cell ...	28	7	5.55	0.31273	0.999624
GO:0042987	amyloid precursor protein catabolic proc...	28	7	5.55	0.31273	0.999624
GO:0045639	positive regulation of myeloid cell diff...	28	7	5.55	0.31273	0.999624
GO:0050709	negative regulation of protein secretion	28	7	5.55	0.31273	0.999624
GO:0050818	regulation of coagulation	28	7	5.55	0.31273	0.999624
GO:0051053	negative regulation of DNA metabolic pro...	28	7	5.55	0.31273	0.999624
GO:0006887	exocytosis	104	23	20.62	0.31337	0.999624
GO:0009142	nucleoside triphosphate biosynthetic pro...	42	10	8.33	0.31348	0.999624
GO:0035637	multicellular organismal signaling	42	10	8.33	0.31348	0.999624
GO:0010976	positive regulation of neuron projection...	61	14	12.09	0.31586	0.999624
GO:0002790	peptide secretion	109	24	21.61	0.31648	0.999624
GO:0000028	ribosomal small subunit assembly	10	3	1.98	0.31688	0.999624
GO:0000731	DNA synthesis involved in DNA repair	10	3	1.98	0.31688	0.999624
GO:0001953	negative regulation of cell-matrix adhes...	10	3	1.98	0.31688	0.999624
GO:0006744	ubiquinone biosynthetic process	10	3	1.98	0.31688	0.999624
GO:0006779	porphyrin-containing compound biosynthet...	10	3	1.98	0.31688	0.999624
GO:0006998	nuclear envelope organization	10	3	1.98	0.31688	0.999624
GO:0007157	heterophilic cell-cell adhesion via plas...	10	3	1.98	0.31688	0.999624
GO:0007595	lactation	10	3	1.98	0.31688	0.999624
GO:0007618	mating	10	3	1.98	0.31688	0.999624
GO:0008631	intrinsic apoptotic signaling pathway in...	10	3	1.98	0.31688	0.999624
GO:0009593	detection of chemical stimulus	10	3	1.98	0.31688	0.999624
GO:0010458	exit from mitosis	10	3	1.98	0.31688	0.999624
GO:0014808	release of sequestered calcium ion into ...	10	3	1.98	0.31688	0.999624
GO:0018230	peptidyl-L-cysteine S-palmitoylation	10	3	1.98	0.31688	0.999624
GO:0018231	peptidyl-S-diacylglycerol-L-cysteine bio...	10	3	1.98	0.31688	0.999624
GO:0021587	cerebellum morphogenesis	10	3	1.98	0.31688	0.999624
GO:0031365	N-terminal protein amino acid modificati...	10	3	1.98	0.31688	0.999624
GO:0033014	tetrapyrrole biosynthetic process	10	3	1.98	0.31688	0.999624
GO:0035176	social behavior	10	3	1.98	0.31688	0.999624
GO:0045987	positive regulation of smooth muscle con...	10	3	1.98	0.31688	0.999624
GO:0046006	regulation of activated T cell prolifera...	10	3	1.98	0.31688	0.999624
GO:0046635	positive regulation of alpha-beta T cell...	10	3	1.98	0.31688	0.999624
GO:0046685	response to arsenic-containing substance	10	3	1.98	0.31688	0.999624
GO:0050850	positive regulation of calcium-mediated ...	10	3	1.98	0.31688	0.999624
GO:0051383	kinetochore organization	10	3	1.98	0.31688	0.999624
GO:0060306	regulation of membrane repolarization	10	3	1.98	0.31688	0.999624
GO:0061647	histone H3-K9 modification	10	3	1.98	0.31688	0.999624
GO:0090114	COPII-coated vesicle budding	10	3	1.98	0.31688	0.999624
GO:0090314	positive regulation of protein targeting...	10	3	1.98	0.31688	0.999624
GO:0099172	presynapse organization	10	3	1.98	0.31688	0.999624
GO:1900120	regulation of receptor binding	10	3	1.98	0.31688	0.999624
GO:1901663	quinone biosynthetic process	10	3	1.98	0.31688	0.999624
GO:1903514	release of sequestered calcium ion into ...	10	3	1.98	0.31688	0.999624
GO:1904030	negative regulation of cyclin-dependent ...	10	3	1.98	0.31688	0.999624
GO:1904994	regulation of leukocyte adhesion to vasc...	10	3	1.98	0.31688	0.999624
GO:0072521	purine-containing compound metabolic pro...	143	31	28.35	0.31791	0.999624
GO:0090150	establishment of protein localization to...	85	19	16.85	0.31798	0.999624
GO:1901137	carbohydrate derivative biosynthetic pro...	182	39	36.08	0.31841	0.999624
GO:0000281	mitotic cytokinesis	19	5	3.77	0.31942	0.999624
GO:0032436	positive regulation of proteasomal ubiqu...	19	5	3.77	0.31942	0.999624
GO:0042181	ketone biosynthetic process	19	5	3.77	0.31942	0.999624
GO:0046676	negative regulation of insulin secretion	19	5	3.77	0.31942	0.999624
GO:0048524	positive regulation of viral process	19	5	3.77	0.31942	0.999624
GO:0050848	regulation of calcium-mediated signaling	19	5	3.77	0.31942	0.999624
GO:1901016	regulation of potassium ion transmembran...	19	5	3.77	0.31942	0.999624
GO:1902305	regulation of sodium ion transmembrane t...	19	5	3.77	0.31942	0.999624
GO:2000677	regulation of transcription regulatory r...	19	5	3.77	0.31942	0.999624
GO:0045664	regulation of neuron differentiation	66	15	13.09	0.32128	0.999624
GO:0060401	cytosolic calcium ion transport	66	15	13.09	0.32128	0.999624
GO:0009266	response to temperature stimulus	47	11	9.32	0.32149	0.999624
GO:0021782	glial cell development	47	11	9.32	0.32149	0.999624
GO:0034612	response to tumor necrosis factor	47	11	9.32	0.32149	0.999624
GO:0071326	cellular response to monosaccharide stim...	47	11	9.32	0.32149	0.999624
GO:0071331	cellular response to hexose stimulus	47	11	9.32	0.32149	0.999624
GO:0032269	negative regulation of cellular protein ...	246	52	48.77	0.32274	0.999624
GO:0001938	positive regulation of endothelial cell ...	33	8	6.54	0.32462	0.999624
GO:0002690	positive regulation of leukocyte chemota...	33	8	6.54	0.32462	0.999624
GO:0006809	nitric oxide biosynthetic process	33	8	6.54	0.32462	0.999624
GO:0007127	meiosis I	33	8	6.54	0.32462	0.999624
GO:0007422	peripheral nervous system development	33	8	6.54	0.32462	0.999624
GO:0019915	lipid storage	33	8	6.54	0.32462	0.999624
GO:0046916	cellular transition metal ion homeostasi...	33	8	6.54	0.32462	0.999624
GO:0070665	positive regulation of leukocyte prolife...	33	8	6.54	0.32462	0.999624
GO:1904035	regulation of epithelial cell apoptotic ...	33	8	6.54	0.32462	0.999624
GO:0050803	regulation of synapse structure or activ...	71	16	14.08	0.32614	0.999624
GO:0051495	positive regulation of cytoskeleton orga...	71	16	14.08	0.32614	0.999624
GO:0044070	regulation of anion transport	271	57	53.73	0.32764	0.999624
GO:0000082	G1/S transition of mitotic cell cycle	52	12	10.31	0.32836	0.999624
GO:0006633	fatty acid biosynthetic process	52	12	10.31	0.32836	0.999624
GO:0009749	response to glucose	52	12	10.31	0.32836	0.999624
GO:0051048	negative regulation of secretion	52	12	10.31	0.32836	0.999624
GO:0071216	cellular response to biotic stimulus	52	12	10.31	0.32836	0.999624
GO:0071241	cellular response to inorganic substance	52	12	10.31	0.32836	0.999624
GO:0099504	synaptic vesicle cycle	52	12	10.31	0.32836	0.999624
GO:0008064	regulation of actin polymerization or de...	76	17	15.07	0.33050	0.999624
GO:0030832	regulation of actin filament length	76	17	15.07	0.33050	0.999624
GO:0005975	carbohydrate metabolic process	178	38	35.29	0.33065	0.999624
GO:0007049	cell cycle	469	97	92.98	0.33085	0.999624
GO:0110020	regulation of actomyosin structure organ...	38	9	7.53	0.33419	0.999624
GO:1901657	glycosyl compound metabolic process	38	9	7.53	0.33419	0.999624
GO:0006575	cellular modified amino acid metabolic p...	57	13	11.3	0.33432	0.999624
GO:0046879	hormone secretion	81	18	16.06	0.33445	0.999624
GO:0000079	regulation of cyclin-dependent protein s...	24	6	4.76	0.33581	0.999624
GO:0009119	ribonucleoside metabolic process	24	6	4.76	0.33581	0.999624
GO:0030500	regulation of bone mineralization	24	6	4.76	0.33581	0.999624
GO:0042278	purine nucleoside metabolic process	24	6	4.76	0.33581	0.999624
GO:0045582	positive regulation of T cell differenti...	24	6	4.76	0.33581	0.999624
GO:0061337	cardiac conduction	24	6	4.76	0.33581	0.999624
GO:0097006	regulation of plasma lipoprotein particl...	24	6	4.76	0.33581	0.999624
GO:0098586	cellular response to virus	24	6	4.76	0.33581	0.999624
GO:0099175	regulation of postsynapse organization	24	6	4.76	0.33581	0.999624
GO:1901019	regulation of calcium ion transmembrane ...	24	6	4.76	0.33581	0.999624
GO:0022603	regulation of anatomical structure morph...	331	69	65.62	0.33663	0.999624
GO:0043085	positive regulation of catalytic activit...	331	69	65.62	0.33663	0.999624
GO:0009895	negative regulation of catabolic process	86	19	17.05	0.33805	0.999624
GO:1901990	regulation of mitotic cell cycle phase t...	86	19	17.05	0.33805	0.999624
GO:0015980	energy derivation by oxidation of organi...	120	26	23.79	0.33912	0.999624
GO:0034250	positive regulation of cellular amide me...	62	14	12.29	0.33955	0.999624
GO:1905952	regulation of lipid localization	62	14	12.29	0.33955	0.999624
GO:1901361	organic cyclic compound catabolic proces...	125	27	24.78	0.34136	0.999624
GO:0010595	positive regulation of endothelial cell ...	43	10	8.53	0.34208	0.999624
GO:0010977	negative regulation of neuron projection...	43	10	8.53	0.34208	0.999624
GO:0006816	calcium ion transport	130	28	25.77	0.34347	0.999624
GO:0030334	regulation of cell migration	307	64	60.87	0.34416	0.999624
GO:0009260	ribonucleotide biosynthetic process	67	15	13.28	0.34418	0.999624
GO:0031330	negative regulation of cellular cataboli...	67	15	13.28	0.34418	0.999624
GO:0050807	regulation of synapse organization	67	15	13.28	0.34418	0.999624
GO:0061138	morphogenesis of a branching epithelium	67	15	13.28	0.34418	0.999624
GO:0006801	superoxide metabolic process	15	4	2.97	0.34523	0.999624
GO:0030866	cortical actin cytoskeleton organization	15	4	2.97	0.34523	0.999624
GO:0031572	G2 DNA damage checkpoint	15	4	2.97	0.34523	0.999624
GO:0031640	killing of cells of other organism	15	4	2.97	0.34523	0.999624
GO:0032350	regulation of hormone metabolic process	15	4	2.97	0.34523	0.999624
GO:0032720	negative regulation of tumor necrosis fa...	15	4	2.97	0.34523	0.999624
GO:0032757	positive regulation of interleukin-8 pro...	15	4	2.97	0.34523	0.999624
GO:0035272	exocrine system development	15	4	2.97	0.34523	0.999624
GO:0042304	regulation of fatty acid biosynthetic pr...	15	4	2.97	0.34523	0.999624
GO:0045682	regulation of epidermis development	15	4	2.97	0.34523	0.999624
GO:0046622	positive regulation of organ growth	15	4	2.97	0.34523	0.999624
GO:0048489	synaptic vesicle transport	15	4	2.97	0.34523	0.999624
GO:0055078	sodium ion homeostasis	15	4	2.97	0.34523	0.999624
GO:0060038	cardiac muscle cell proliferation	15	4	2.97	0.34523	0.999624
GO:0071711	basement membrane organization	15	4	2.97	0.34523	0.999624
GO:0072595	maintenance of protein localization in o...	15	4	2.97	0.34523	0.999624
GO:0097242	amyloid-beta clearance	15	4	2.97	0.34523	0.999624
GO:1903350	response to dopamine	15	4	2.97	0.34523	0.999624
GO:1903351	cellular response to dopamine	15	4	2.97	0.34523	0.999624
GO:1903556	negative regulation of tumor necrosis fa...	15	4	2.97	0.34523	0.999624
GO:1903961	positive regulation of anion transmembra...	15	4	2.97	0.34523	0.999624
GO:1905818	regulation of chromosome separation	15	4	2.97	0.34523	0.999624
GO:2000649	regulation of sodium ion transmembrane t...	15	4	2.97	0.34523	0.999624
GO:0007204	positive regulation of cytosolic calcium...	101	22	20.02	0.34714	0.999624
GO:1903827	regulation of cellular protein localizat...	189	40	37.47	0.34732	0.999624
GO:0002792	negative regulation of peptide secretion	29	7	5.75	0.34793	0.999624
GO:0003073	regulation of systemic arterial blood pr...	29	7	5.75	0.34793	0.999624
GO:0009062	fatty acid catabolic process	29	7	5.75	0.34793	0.999624
GO:0032755	positive regulation of interleukin-6 pro...	29	7	5.75	0.34793	0.999624
GO:0045428	regulation of nitric oxide biosynthetic ...	29	7	5.75	0.34793	0.999624
GO:0046545	development of primary female sexual cha...	29	7	5.75	0.34793	0.999624
GO:0070830	bicellular tight junction assembly	29	7	5.75	0.34793	0.999624
GO:0010038	response to metal ion	72	16	14.27	0.34831	0.999624
GO:0007605	sensory perception of sound	48	11	9.52	0.34871	0.999624
GO:0009060	aerobic respiration	48	11	9.52	0.34871	0.999624
GO:0051961	negative regulation of nervous system de...	48	11	9.52	0.34871	0.999624
GO:0010562	positive regulation of phosphorus metabo...	273	57	54.13	0.35066	0.999624
GO:0045937	positive regulation of phosphate metabol...	273	57	54.13	0.35066	0.999624
GO:0033002	muscle cell proliferation	77	17	15.27	0.35202	0.999624
GO:0045927	positive regulation of growth	77	17	15.27	0.35202	0.999624
GO:0071214	cellular response to abiotic stimulus	77	17	15.27	0.35202	0.999624
GO:0104004	cellular response to environmental stimu...	77	17	15.27	0.35202	0.999624
GO:0042176	regulation of protein catabolic process	116	25	23	0.35431	0.999624
GO:0009746	response to hexose	53	12	10.51	0.35438	0.999624
GO:0030048	actin filament-based movement	53	12	10.51	0.35438	0.999624
GO:0034284	response to monosaccharide	53	12	10.51	0.35438	0.999624
GO:0071897	DNA biosynthetic process	53	12	10.51	0.35438	0.999624
GO:0009914	hormone transport	82	18	16.26	0.35537	0.999624
GO:1903037	regulation of leukocyte cell-cell adhesi...	82	18	16.26	0.35537	0.999624
GO:0006400	tRNA modification	34	8	6.74	0.35734	0.999624
GO:0051492	regulation of stress fiber assembly	34	8	6.74	0.35734	0.999624
GO:0061982	meiosis I cell cycle process	34	8	6.74	0.35734	0.999624
GO:0120162	positive regulation of cold-induced ther...	34	8	6.74	0.35734	0.999624
GO:0099111	microtubule-based transport	58	13	11.5	0.35930	0.999624
GO:0043086	negative regulation of catalytic activit...	185	39	36.68	0.36012	0.999624
GO:0051047	positive regulation of secretion	92	20	18.24	0.36119	0.999624
GO:0000266	mitochondrial fission	20	5	3.97	0.36266	0.999624
GO:0002763	positive regulation of myeloid leukocyte...	20	5	3.97	0.36266	0.999624
GO:0010972	negative regulation of G2/M transition o...	20	5	3.97	0.36266	0.999624
GO:0014037	Schwann cell differentiation	20	5	3.97	0.36266	0.999624
GO:0031122	cytoplasmic microtubule organization	20	5	3.97	0.36266	0.999624
GO:0032637	interleukin-8 production	20	5	3.97	0.36266	0.999624
GO:0032677	regulation of interleukin-8 production	20	5	3.97	0.36266	0.999624
GO:0035567	non-canonical Wnt signaling pathway	20	5	3.97	0.36266	0.999624
GO:0042490	mechanoreceptor differentiation	20	5	3.97	0.36266	0.999624
GO:0043407	negative regulation of MAP kinase activi...	20	5	3.97	0.36266	0.999624
GO:0048488	synaptic vesicle endocytosis	20	5	3.97	0.36266	0.999624
GO:0086004	regulation of cardiac muscle cell contra...	20	5	3.97	0.36266	0.999624
GO:0086065	cell communication involved in cardiac c...	20	5	3.97	0.36266	0.999624
GO:0140238	presynaptic endocytosis	20	5	3.97	0.36266	0.999624
GO:0001570	vasculogenesis	39	9	7.73	0.36488	0.999624
GO:0030902	hindbrain development	39	9	7.73	0.36488	0.999624
GO:0050728	negative regulation of inflammatory resp...	39	9	7.73	0.36488	0.999624
GO:0071453	cellular response to oxygen levels	39	9	7.73	0.36488	0.999624
GO:0071692	protein localization to extracellular re...	102	22	20.22	0.36608	0.999624
GO:0098813	nuclear chromosome segregation	68	15	13.48	0.36739	0.999624
GO:0007417	central nervous system development	240	50	47.58	0.36986	0.999624
GO:0051301	cell division	166	35	32.91	0.37012	0.999624
GO:0051259	protein complex oligomerization	73	16	14.47	0.37077	0.999624
GO:0002793	positive regulation of peptide secretion	44	10	8.72	0.37109	0.999624
GO:0009612	response to mechanical stimulus	44	10	8.72	0.37109	0.999624
GO:0010522	regulation of calcium ion transport into...	44	10	8.72	0.37109	0.999624
GO:0016052	carbohydrate catabolic process	44	10	8.72	0.37109	0.999624
GO:0016482	cytosolic transport	44	10	8.72	0.37109	0.999624
GO:0051209	release of sequestered calcium ion into ...	44	10	8.72	0.37109	0.999624
GO:0051283	negative regulation of sequestering of c...	44	10	8.72	0.37109	0.999624
GO:1903900	regulation of viral life cycle	44	10	8.72	0.37109	0.999624
GO:0019439	aromatic compound catabolic process	117	25	23.2	0.37209	0.999624
GO:0070997	neuron death	117	25	23.2	0.37209	0.999624
GO:0040008	regulation of growth	181	38	35.89	0.37335	0.999624
GO:0051651	maintenance of location in cell	78	17	15.46	0.37380	0.999624
GO:0051235	maintenance of location	122	26	24.19	0.37382	0.999624
GO:0008652	cellular amino acid biosynthetic process	25	6	4.96	0.37467	0.999624
GO:0034109	homotypic cell-cell adhesion	25	6	4.96	0.37467	0.999624
GO:0046364	monosaccharide biosynthetic process	25	6	4.96	0.37467	0.999624
GO:0050906	detection of stimulus involved in sensor...	25	6	4.96	0.37467	0.999624
GO:0051668	localization within membrane	25	6	4.96	0.37467	0.999624
GO:0098659	inorganic cation import across plasma me...	25	6	4.96	0.37467	0.999624
GO:0099587	inorganic ion import across plasma membr...	25	6	4.96	0.37467	0.999624
GO:1901992	positive regulation of mitotic cell cycl...	25	6	4.96	0.37467	0.999624
GO:1904029	regulation of cyclin-dependent protein k...	25	6	4.96	0.37467	0.999624
GO:0033993	response to lipid	191	40	37.87	0.37525	0.999624
GO:0043524	negative regulation of neuron apoptotic ...	49	11	9.71	0.37629	0.999624
GO:1903046	meiotic cell cycle process	49	11	9.71	0.37629	0.999624
GO:0001707	mesoderm formation	11	3	2.18	0.37682	0.999624
GO:0001886	endothelial cell morphogenesis	11	3	2.18	0.37682	0.999624
GO:0002082	regulation of oxidative phosphorylation	11	3	2.18	0.37682	0.999624
GO:0006687	glycosphingolipid metabolic process	11	3	2.18	0.37682	0.999624
GO:0007095	mitotic G2 DNA damage checkpoint	11	3	2.18	0.37682	0.999624
GO:0007212	dopamine receptor signaling pathway	11	3	2.18	0.37682	0.999624
GO:0008089	anterograde axonal transport	11	3	2.18	0.37682	0.999624
GO:0015695	organic cation transport	11	3	2.18	0.37682	0.999624
GO:0019320	hexose catabolic process	11	3	2.18	0.37682	0.999624
GO:0021575	hindbrain morphogenesis	11	3	2.18	0.37682	0.999624
GO:0030104	water homeostasis	11	3	2.18	0.37682	0.999624
GO:0034383	low-density lipoprotein particle clearan...	11	3	2.18	0.37682	0.999624
GO:0034661	ncRNA catabolic process	11	3	2.18	0.37682	0.999624
GO:0036230	granulocyte activation	11	3	2.18	0.37682	0.999624
GO:0042558	pteridine-containing compound metabolic ...	11	3	2.18	0.37682	0.999624
GO:0043470	regulation of carbohydrate catabolic pro...	11	3	2.18	0.37682	0.999624
GO:0044062	regulation of excretion	11	3	2.18	0.37682	0.999624
GO:0045776	negative regulation of blood pressure	11	3	2.18	0.37682	0.999624
GO:0045995	regulation of embryonic development	11	3	2.18	0.37682	0.999624
GO:0046365	monosaccharide catabolic process	11	3	2.18	0.37682	0.999624
GO:0048710	regulation of astrocyte differentiation	11	3	2.18	0.37682	0.999624
GO:0048873	homeostasis of number of cells within a ...	11	3	2.18	0.37682	0.999624
GO:0050779	RNA destabilization	11	3	2.18	0.37682	0.999624
GO:0051014	actin filament severing	11	3	2.18	0.37682	0.999624
GO:0051703	biological process involved in intraspec...	11	3	2.18	0.37682	0.999624
GO:0051894	positive regulation of focal adhesion as...	11	3	2.18	0.37682	0.999624
GO:0061157	mRNA destabilization	11	3	2.18	0.37682	0.999624
GO:0070542	response to fatty acid	11	3	2.18	0.37682	0.999624
GO:0071827	plasma lipoprotein particle organization	11	3	2.18	0.37682	0.999624
GO:0090311	regulation of protein deacetylation	11	3	2.18	0.37682	0.999624
GO:0120178	steroid hormone biosynthetic process	11	3	2.18	0.37682	0.999624
GO:0150117	positive regulation of cell-substrate ju...	11	3	2.18	0.37682	0.999624
GO:1902430	negative regulation of amyloid-beta form...	11	3	2.18	0.37682	0.999624
GO:1902993	positive regulation of amyloid precursor...	11	3	2.18	0.37682	0.999624
GO:1903649	regulation of cytoplasmic transport	11	3	2.18	0.37682	0.999624
GO:1903859	regulation of dendrite extension	11	3	2.18	0.37682	0.999624
GO:0051402	neuron apoptotic process	88	19	17.45	0.37900	0.999624
GO:0000075	cell cycle checkpoint	54	12	10.71	0.38073	0.999624
GO:0021915	neural tube development	54	12	10.71	0.38073	0.999624
GO:0006874	cellular calcium ion homeostasis	147	31	29.14	0.38091	0.999624
GO:0018108	peptidyl-tyrosine phosphorylation	93	20	18.44	0.38126	0.999624
GO:0018212	peptidyl-tyrosine modification	93	20	18.44	0.38126	0.999624
GO:0007159	leukocyte cell-cell adhesion	98	21	19.43	0.38332	0.999624
GO:0006497	protein lipidation	30	7	5.95	0.38353	0.999624
GO:0007189	adenylate cyclase-activating G protein-c...	30	7	5.95	0.38353	0.999624
GO:0008344	adult locomotory behavior	30	7	5.95	0.38353	0.999624
GO:0021987	cerebral cortex development	30	7	5.95	0.38353	0.999624
GO:0086003	cardiac muscle cell contraction	30	7	5.95	0.38353	0.999624
GO:1903578	regulation of ATP metabolic process	30	7	5.95	0.38353	0.999624
GO:0046903	secretion	256	53	50.75	0.38410	0.999624
GO:0016054	organic acid catabolic process	59	13	11.7	0.38455	0.999624
GO:0009152	purine ribonucleotide biosynthetic proce...	64	14	12.69	0.38789	0.999624
GO:0099003	vesicle-mediated transport in synapse	64	14	12.69	0.38789	0.999624
GO:1901215	negative regulation of neuron death	64	14	12.69	0.38789	0.999624
GO:0002377	immunoglobulin production	35	8	6.94	0.39038	0.999624
GO:0030282	bone mineralization	35	8	6.94	0.39038	0.999624
GO:0032092	positive regulation of protein binding	35	8	6.94	0.39038	0.999624
GO:1901890	positive regulation of cell junction ass...	35	8	6.94	0.39038	0.999624
GO:0006164	purine nucleotide biosynthetic process	69	15	13.68	0.39084	0.999624
GO:0007266	Rho protein signal transduction	69	15	13.68	0.39084	0.999624
GO:0048589	developmental growth	207	43	41.04	0.39144	0.999624
GO:0044419	biological process involved in interspec...	376	77	74.55	0.39194	0.999624
GO:0019058	viral life cycle	74	16	14.67	0.39345	0.999624
GO:0071695	anatomical structure maturation	74	16	14.67	0.39345	0.999624
GO:0071407	cellular response to organic cyclic comp...	133	28	26.37	0.39390	0.999624
GO:0001895	retina homeostasis	16	4	3.17	0.39489	0.999624
GO:0002548	monocyte chemotaxis	16	4	3.17	0.39489	0.999624
GO:0006120	mitochondrial electron transport, NADH t...	16	4	3.17	0.39489	0.999624
GO:0010799	regulation of peptidyl-threonine phospho...	16	4	3.17	0.39489	0.999624
GO:0030947	regulation of vascular endothelial growt...	16	4	3.17	0.39489	0.999624
GO:0033045	regulation of sister chromatid segregati...	16	4	3.17	0.39489	0.999624
GO:0042551	neuron maturation	16	4	3.17	0.39489	0.999624
GO:0044319	wound healing, spreading of cells	16	4	3.17	0.39489	0.999624
GO:0045907	positive regulation of vasoconstriction	16	4	3.17	0.39489	0.999624
GO:0048246	macrophage chemotaxis	16	4	3.17	0.39489	0.999624
GO:0050994	regulation of lipid catabolic process	16	4	3.17	0.39489	0.999624
GO:0070527	platelet aggregation	16	4	3.17	0.39489	0.999624
GO:0070849	response to epidermal growth factor	16	4	3.17	0.39489	0.999624
GO:0090504	epiboly	16	4	3.17	0.39489	0.999624
GO:0090505	epiboly involved in wound healing	16	4	3.17	0.39489	0.999624
GO:0097479	synaptic vesicle localization	16	4	3.17	0.39489	0.999624
GO:1901381	positive regulation of potassium ion tra...	16	4	3.17	0.39489	0.999624
GO:0009894	regulation of catabolic process	242	50	47.98	0.39519	0.999624
GO:0043523	regulation of neuron apoptotic process	79	17	15.66	0.39578	0.999624
GO:0002688	regulation of leukocyte chemotaxis	40	9	7.93	0.39585	0.999624
GO:0019079	viral genome replication	40	9	7.93	0.39585	0.999624
GO:0019233	sensory perception of pain	40	9	7.93	0.39585	0.999624
GO:0034614	cellular response to reactive oxygen spe...	40	9	7.93	0.39585	0.999624
GO:0010608	posttranscriptional regulation of gene e...	153	32	30.33	0.39796	0.999624
GO:0051208	sequestering of calcium ion	45	10	8.92	0.40033	0.999624
GO:0051282	regulation of sequestering of calcium io...	45	10	8.92	0.40033	0.999624
GO:0048193	Golgi vesicle transport	94	20	18.64	0.40149	0.999624
GO:0035023	regulation of Rho protein signal transdu...	50	11	9.91	0.40408	0.999624
GO:0006913	nucleocytoplasmic transport	104	22	20.62	0.40448	0.999624
GO:0051169	nuclear transport	104	22	20.62	0.40448	0.999624
GO:0043270	positive regulation of ion transport	213	44	42.23	0.40565	0.999624
GO:0006911	phagocytosis, engulfment	21	5	4.16	0.40601	0.999624
GO:0010171	body morphogenesis	21	5	4.16	0.40601	0.999624
GO:0031641	regulation of myelination	21	5	4.16	0.40601	0.999624
GO:0032623	interleukin-2 production	21	5	4.16	0.40601	0.999624
GO:0043268	positive regulation of potassium ion tra...	21	5	4.16	0.40601	0.999624
GO:0046847	filopodium assembly	21	5	4.16	0.40601	0.999624
GO:0071347	cellular response to interleukin-1	21	5	4.16	0.40601	0.999624
GO:0090278	negative regulation of peptide hormone s...	21	5	4.16	0.40601	0.999624
GO:0046700	heterocycle catabolic process	114	24	22.6	0.40700	0.999624
GO:0048754	branching morphogenesis of an epithelial...	55	12	10.9	0.40725	0.999624
GO:0006163	purine nucleotide metabolic process	134	28	26.57	0.41097	0.999624
GO:0051090	regulation of DNA-binding transcription ...	134	28	26.57	0.41097	0.999624
GO:0071396	cellular response to lipid	134	28	26.57	0.41097	0.999624
GO:0032868	response to insulin	65	14	12.89	0.41235	0.999624
GO:0000959	mitochondrial RNA metabolic process	26	6	5.15	0.41363	0.999624
GO:0019229	regulation of vasoconstriction	26	6	5.15	0.41363	0.999624
GO:0032507	maintenance of protein location in cell	26	6	5.15	0.41363	0.999624
GO:0034754	cellular hormone metabolic process	26	6	5.15	0.41363	0.999624
GO:0042147	retrograde transport, endosome to Golgi	26	6	5.15	0.41363	0.999624
GO:0050766	positive regulation of phagocytosis	26	6	5.15	0.41363	0.999624
GO:0060976	coronary vasculature development	26	6	5.15	0.41363	0.999624
GO:1903078	positive regulation of protein localizat...	26	6	5.15	0.41363	0.999624
GO:0007160	cell-matrix adhesion	70	15	13.88	0.41443	0.999624
GO:0046390	ribose phosphate biosynthetic process	70	15	13.88	0.41443	0.999624
GO:0043393	regulation of protein binding	75	16	14.87	0.41626	0.999624
GO:0009725	response to hormone	179	37	35.49	0.41668	0.999624
GO:0008286	insulin receptor signaling pathway	31	7	6.15	0.41922	0.999624
GO:0019217	regulation of fatty acid metabolic proce...	31	7	6.15	0.41922	0.999624
GO:0019218	regulation of steroid metabolic process	31	7	6.15	0.41922	0.999624
GO:0030168	platelet activation	31	7	6.15	0.41922	0.999624
GO:0042158	lipoprotein biosynthetic process	31	7	6.15	0.41922	0.999624
GO:0046660	female sex differentiation	31	7	6.15	0.41922	0.999624
GO:0072329	monocarboxylic acid catabolic process	31	7	6.15	0.41922	0.999624
GO:0080164	regulation of nitric oxide metabolic pro...	31	7	6.15	0.41922	0.999624
GO:0051924	regulation of calcium ion transport	90	19	17.84	0.42064	0.999624
GO:0019221	cytokine-mediated signaling pathway	95	20	18.83	0.42182	0.999624
GO:0051240	positive regulation of multicellular org...	434	88	86.05	0.42309	0.999624
GO:0006612	protein targeting to membrane	36	8	7.14	0.42350	0.999624
GO:0019751	polyol metabolic process	36	8	7.14	0.42350	0.999624
GO:0031398	positive regulation of protein ubiquitin...	36	8	7.14	0.42350	0.999624
GO:0042471	ear morphogenesis	36	8	7.14	0.42350	0.999624
GO:0046209	nitric oxide metabolic process	36	8	7.14	0.42350	0.999624
GO:0050764	regulation of phagocytosis	36	8	7.14	0.42350	0.999624
GO:0060759	regulation of response to cytokine stimu...	36	8	7.14	0.42350	0.999624
GO:2000045	regulation of G1/S transition of mitotic...	36	8	7.14	0.42350	0.999624
GO:0032102	negative regulation of response to exter...	105	22	20.82	0.42385	0.999624
GO:1901214	regulation of neuron death	105	22	20.82	0.42385	0.999624
GO:0042060	wound healing	120	25	23.79	0.42627	0.999624
GO:0016525	negative regulation of angiogenesis	41	9	8.13	0.42690	0.999624
GO:0032675	regulation of interleukin-6 production	41	9	8.13	0.42690	0.999624
GO:0062013	positive regulation of small molecule me...	41	9	8.13	0.42690	0.999624
GO:2000181	negative regulation of blood vessel morp...	41	9	8.13	0.42690	0.999624
GO:2001242	regulation of intrinsic apoptotic signal...	41	9	8.13	0.42690	0.999624
GO:0007600	sensory perception	130	27	25.77	0.42756	0.999624
GO:0071900	regulation of protein serine/threonine k...	135	28	26.77	0.42812	0.999624
GO:0001838	embryonic epithelial tube formation	46	10	9.12	0.42966	0.999624
GO:0032273	positive regulation of protein polymeriz...	46	10	9.12	0.42966	0.999624
GO:0046822	regulation of nucleocytoplasmic transpor...	46	10	9.12	0.42966	0.999624
GO:0050768	negative regulation of neurogenesis	46	10	9.12	0.42966	0.999624
GO:0140013	meiotic nuclear division	46	10	9.12	0.42966	0.999624
GO:0072503	cellular divalent inorganic cation homeo...	155	32	30.73	0.42998	0.999624
GO:0044057	regulation of system process	170	35	33.7	0.43104	0.999624
GO:0001936	regulation of endothelial cell prolifera...	51	11	10.11	0.43194	0.999624
GO:0051216	cartilage development	51	11	10.11	0.43194	0.999624
GO:0097553	calcium ion transmembrane import into cy...	51	11	10.11	0.43194	0.999624
GO:0031329	regulation of cellular catabolic process	200	41	39.65	0.43252	0.999624
GO:0001935	endothelial cell proliferation	56	12	11.1	0.43385	0.999624
GO:0002687	positive regulation of leukocyte migrati...	56	12	11.1	0.43385	0.999624
GO:0060402	calcium ion transport into cytosol	56	12	11.1	0.43385	0.999624
GO:1903169	regulation of calcium ion transmembrane ...	56	12	11.1	0.43385	0.999624
GO:0071495	cellular response to endogenous stimulus	355	72	70.38	0.43395	0.999624
GO:0019637	organophosphate metabolic process	290	59	57.5	0.43414	0.999624
GO:0001505	regulation of neurotransmitter levels	61	13	12.09	0.43548	0.999624
GO:0006836	neurotransmitter transport	61	13	12.09	0.43548	0.999624
GO:0015850	organic hydroxy compound transport	61	13	12.09	0.43548	0.999624
GO:0001516	prostaglandin biosynthetic process	12	3	2.38	0.43556	0.999624
GO:0002534	cytokine production involved in inflamma...	12	3	2.38	0.43556	0.999624
GO:0006656	phosphatidylcholine biosynthetic process	12	3	2.38	0.43556	0.999624
GO:0009218	pyrimidine ribonucleotide metabolic proc...	12	3	2.38	0.43556	0.999624
GO:0009303	rRNA transcription	12	3	2.38	0.43556	0.999624
GO:0010758	regulation of macrophage chemotaxis	12	3	2.38	0.43556	0.999624
GO:0021766	hippocampus development	12	3	2.38	0.43556	0.999624
GO:0030808	regulation of nucleotide biosynthetic pr...	12	3	2.38	0.43556	0.999624
GO:0031018	endocrine pancreas development	12	3	2.38	0.43556	0.999624
GO:0031648	protein destabilization	12	3	2.38	0.43556	0.999624
GO:0032608	interferon-beta production	12	3	2.38	0.43556	0.999624
GO:0032648	regulation of interferon-beta production	12	3	2.38	0.43556	0.999624
GO:0032801	receptor catabolic process	12	3	2.38	0.43556	0.999624
GO:0034390	smooth muscle cell apoptotic process	12	3	2.38	0.43556	0.999624
GO:0034391	regulation of smooth muscle cell apoptot...	12	3	2.38	0.43556	0.999624
GO:0042776	mitochondrial ATP synthesis coupled prot...	12	3	2.38	0.43556	0.999624
GO:0043267	negative regulation of potassium ion tra...	12	3	2.38	0.43556	0.999624
GO:0043330	response to exogenous dsRNA	12	3	2.38	0.43556	0.999624
GO:0044060	regulation of endocrine process	12	3	2.38	0.43556	0.999624
GO:0044275	cellular carbohydrate catabolic process	12	3	2.38	0.43556	0.999624
GO:0045494	photoreceptor cell maintenance	12	3	2.38	0.43556	0.999624
GO:0045840	positive regulation of mitotic nuclear d...	12	3	2.38	0.43556	0.999624
GO:0045923	positive regulation of fatty acid metabo...	12	3	2.38	0.43556	0.999624
GO:0045943	positive regulation of transcription by ...	12	3	2.38	0.43556	0.999624
GO:0046457	prostanoid biosynthetic process	12	3	2.38	0.43556	0.999624
GO:0048332	mesoderm morphogenesis	12	3	2.38	0.43556	0.999624
GO:0048713	regulation of oligodendrocyte differenti...	12	3	2.38	0.43556	0.999624
GO:0050798	activated T cell proliferation	12	3	2.38	0.43556	0.999624
GO:0051339	regulation of lyase activity	12	3	2.38	0.43556	0.999624
GO:0051438	regulation of ubiquitin-protein transfer...	12	3	2.38	0.43556	0.999624
GO:0051568	histone H3-K4 methylation	12	3	2.38	0.43556	0.999624
GO:0060999	positive regulation of dendritic spine d...	12	3	2.38	0.43556	0.999624
GO:0070534	protein K63-linked ubiquitination	12	3	2.38	0.43556	0.999624
GO:0071825	protein-lipid complex subunit organizati...	12	3	2.38	0.43556	0.999624
GO:0090322	regulation of superoxide metabolic proce...	12	3	2.38	0.43556	0.999624
GO:1900371	regulation of purine nucleotide biosynth...	12	3	2.38	0.43556	0.999624
GO:1901099	negative regulation of signal transducti...	12	3	2.38	0.43556	0.999624
GO:2001240	negative regulation of extrinsic apoptot...	12	3	2.38	0.43556	0.999624
GO:0001763	morphogenesis of a branching structure	71	15	14.08	0.43808	0.999624
GO:0045930	negative regulation of mitotic cell cycl...	71	15	14.08	0.43808	0.999624
GO:0050920	regulation of chemotaxis	71	15	14.08	0.43808	0.999624
GO:0034599	cellular response to oxidative stress	86	18	17.05	0.44086	0.999624
GO:0045333	cellular respiration	91	19	18.04	0.44157	0.999624
GO:0010959	regulation of metal ion transport	96	20	19.03	0.44220	0.999624
GO:0043271	negative regulation of ion transport	111	23	22.01	0.44371	0.999624
GO:0003044	regulation of systemic arterial blood pr...	17	4	3.37	0.44391	0.999624
GO:0032330	regulation of chondrocyte differentiatio...	17	4	3.37	0.44391	0.999624
GO:0034381	plasma lipoprotein particle clearance	17	4	3.37	0.44391	0.999624
GO:0043392	negative regulation of DNA binding	17	4	3.37	0.44391	0.999624
GO:0043620	regulation of DNA-templated transcriptio...	17	4	3.37	0.44391	0.999624
GO:0043647	inositol phosphate metabolic process	17	4	3.37	0.44391	0.999624
GO:0051965	positive regulation of synapse assembly	17	4	3.37	0.44391	0.999624
GO:0070839	metal ion export	17	4	3.37	0.44391	0.999624
GO:1901068	guanosine-containing compound metabolic ...	17	4	3.37	0.44391	0.999624
GO:1902017	regulation of cilium assembly	17	4	3.37	0.44391	0.999624
GO:1905268	negative regulation of chromatin organiz...	17	4	3.37	0.44391	0.999624
GO:0009150	purine ribonucleotide metabolic process	126	26	24.98	0.44478	0.999624
GO:0051130	positive regulation of cellular componen...	341	69	67.61	0.44514	0.999624
GO:0055074	calcium ion homeostasis	151	31	29.94	0.44591	0.999624
GO:0051050	positive regulation of transport	291	59	57.69	0.44608	0.999624
GO:0006935	chemotaxis	171	35	33.9	0.44642	0.999624
GO:0001934	positive regulation of protein phosphory...	231	47	45.8	0.44674	0.999624
GO:0001954	positive regulation of cell-matrix adhes...	22	5	4.36	0.44894	0.999624
GO:0006094	gluconeogenesis	22	5	4.36	0.44894	0.999624
GO:0006140	regulation of nucleotide metabolic proce...	22	5	4.36	0.44894	0.999624
GO:0006360	transcription by RNA polymerase I	22	5	4.36	0.44894	0.999624
GO:0007589	body fluid secretion	22	5	4.36	0.44894	0.999624
GO:0009063	cellular amino acid catabolic process	22	5	4.36	0.44894	0.999624
GO:0009123	nucleoside monophosphate metabolic proce...	22	5	4.36	0.44894	0.999624
GO:0042307	positive regulation of protein import in...	22	5	4.36	0.44894	0.999624
GO:0046513	ceramide biosynthetic process	22	5	4.36	0.44894	0.999624
GO:0062014	negative regulation of small molecule me...	22	5	4.36	0.44894	0.999624
GO:0120254	olefinic compound metabolic process	22	5	4.36	0.44894	0.999624
GO:0140115	export across plasma membrane	22	5	4.36	0.44894	0.999624
GO:1900542	regulation of purine nucleotide metaboli...	22	5	4.36	0.44894	0.999624
GO:1902750	negative regulation of cell cycle G2/M p...	22	5	4.36	0.44894	0.999624
GO:1903115	regulation of actin filament-based movem...	22	5	4.36	0.44894	0.999624
GO:1903533	regulation of protein targeting	22	5	4.36	0.44894	0.999624
GO:0014015	positive regulation of gliogenesis	27	6	5.35	0.45231	0.999624
GO:0042116	macrophage activation	27	6	5.35	0.45231	0.999624
GO:0045069	regulation of viral genome replication	27	6	5.35	0.45231	0.999624
GO:0048041	focal adhesion assembly	27	6	5.35	0.45231	0.999624
GO:0070555	response to interleukin-1	27	6	5.35	0.45231	0.999624
GO:1901989	positive regulation of cell cycle phase ...	27	6	5.35	0.45231	0.999624
GO:1901700	response to oxygen-containing compound	412	83	81.68	0.45371	0.999624
GO:0002702	positive regulation of production of mol...	32	7	6.34	0.45470	0.999624
GO:0010660	regulation of muscle cell apoptotic proc...	32	7	6.34	0.45470	0.999624
GO:0042472	inner ear morphogenesis	32	7	6.34	0.45470	0.999624
GO:0050905	neuromuscular process	32	7	6.34	0.45470	0.999624
GO:0052126	movement in host environment	32	7	6.34	0.45470	0.999624
GO:0071456	cellular response to hypoxia	32	7	6.34	0.45470	0.999624
GO:0008277	regulation of G protein-coupled receptor...	37	8	7.34	0.45648	0.999624
GO:2001057	reactive nitrogen species metabolic proc...	37	8	7.34	0.45648	0.999624
GO:1901343	negative regulation of vasculature devel...	42	9	8.33	0.45783	0.999624
GO:1905954	positive regulation of lipid localizatio...	42	9	8.33	0.45783	0.999624
GO:0045446	endothelial cell differentiation	52	11	10.31	0.45972	0.999624
GO:0045727	positive regulation of translation	52	11	10.31	0.45972	0.999624
GO:0071322	cellular response to carbohydrate stimul...	52	11	10.31	0.45972	0.999624
GO:0044843	cell cycle G1/S phase transition	57	12	11.3	0.46039	0.999624
GO:0046395	carboxylic acid catabolic process	57	12	11.3	0.46039	0.999624
GO:0031348	negative regulation of defense response	62	13	12.29	0.46093	0.999624
GO:0051321	meiotic cell cycle	62	13	12.29	0.46093	0.999624
GO:0045766	positive regulation of angiogenesis	67	14	13.28	0.46136	0.999624
GO:1904018	positive regulation of vasculature devel...	67	14	13.28	0.46136	0.999624
GO:0045087	innate immune response	177	36	35.09	0.46170	0.999624
GO:0032388	positive regulation of intracellular tra...	72	15	14.27	0.46170	0.999624
GO:0051607	defense response to virus	72	15	14.27	0.46170	0.999624
GO:0140546	defense response to symbiont	72	15	14.27	0.46170	0.999624
GO:0030001	metal ion transport	157	32	31.13	0.46217	0.999624
GO:0060271	cilium assembly	82	17	16.26	0.46219	0.999624
GO:1903532	positive regulation of secretion by cell	87	18	17.25	0.46236	0.999624
GO:0070588	calcium ion transmembrane transport	92	19	18.24	0.46249	0.999624
GO:1901987	regulation of cell cycle phase transitio...	92	19	18.24	0.46249	0.999624
GO:0019693	ribose phosphate metabolic process	137	28	27.16	0.46252	0.999624
GO:0009259	ribonucleotide metabolic process	132	27	26.17	0.46258	0.999624
GO:0051346	negative regulation of hydrolase activit...	102	21	20.22	0.46265	0.999624
GO:0006631	fatty acid metabolic process	122	25	24.19	0.46267	0.999624
GO:0044770	cell cycle phase transition	122	25	24.19	0.46267	0.999624
GO:0034097	response to cytokine	248	50	49.17	0.47253	0.999624
GO:0048646	anatomical structure formation involved ...	389	78	77.12	0.47563	0.999624
GO:0042330	taxis	173	35	34.3	0.47722	0.999624
GO:0051270	regulation of cellular component movemen...	359	72	71.18	0.47751	0.999624
GO:0022411	cellular component disassembly	123	25	24.39	0.48085	0.999624
GO:0001944	vasculature development	294	59	58.29	0.48197	0.999624
GO:1901135	carbohydrate derivative metabolic proces...	294	59	58.29	0.48197	0.999624
GO:0002696	positive regulation of leukocyte activat...	88	18	17.45	0.48380	0.999624
GO:0007162	negative regulation of cell adhesion	83	17	16.46	0.48426	0.999624
GO:0032101	regulation of response to external stimu...	259	52	51.35	0.48465	0.999624
GO:0031032	actomyosin structure organization	78	16	15.46	0.48473	0.999624
GO:0001894	tissue homeostasis	73	15	14.47	0.48522	0.999624
GO:0032984	protein-containing complex disassembly	73	15	14.47	0.48522	0.999624
GO:0045926	negative regulation of growth	73	15	14.47	0.48522	0.999624
GO:0033673	negative regulation of kinase activity	68	14	13.48	0.48572	0.999624
GO:0002274	myeloid leukocyte activation	63	13	12.49	0.48623	0.999624
GO:0007249	I-kappaB kinase/NF-kappaB signaling	63	13	12.49	0.48623	0.999624
GO:0000209	protein polyubiquitination	58	12	11.5	0.48676	0.999624
GO:0009743	response to carbohydrate	58	12	11.5	0.48676	0.999624
GO:0031396	regulation of protein ubiquitination	58	12	11.5	0.48676	0.999624
GO:0043583	ear development	58	12	11.5	0.48676	0.999624
GO:0043244	regulation of protein-containing complex...	48	10	9.52	0.48788	0.999624
GO:0072175	epithelial tube formation	48	10	9.52	0.48788	0.999624
GO:0061024	membrane organization	219	44	43.42	0.48808	0.999624
GO:0009267	cellular response to starvation	43	9	8.53	0.48847	0.999624
GO:0031214	biomineral tissue development	43	9	8.53	0.48847	0.999624
GO:0032635	interleukin-6 production	43	9	8.53	0.48847	0.999624
GO:0042594	response to starvation	43	9	8.53	0.48847	0.999624
GO:0046434	organophosphate catabolic process	43	9	8.53	0.48847	0.999624
GO:0000077	DNA damage checkpoint	38	8	7.53	0.48909	0.999624
GO:0000086	G2/M transition of mitotic cell cycle	38	8	7.53	0.48909	0.999624
GO:0001885	endothelial cell development	38	8	7.53	0.48909	0.999624
GO:0046488	phosphatidylinositol metabolic process	38	8	7.53	0.48909	0.999624
GO:0050714	positive regulation of protein secretion	38	8	7.53	0.48909	0.999624
GO:0051279	regulation of release of sequestered cal...	38	8	7.53	0.48909	0.999624
GO:0006754	ATP biosynthetic process	33	7	6.54	0.48972	0.999624
GO:0010657	muscle cell apoptotic process	33	7	6.54	0.48972	0.999624
GO:0014013	regulation of gliogenesis	33	7	6.54	0.48972	0.999624
GO:0018022	peptidyl-lysine methylation	33	7	6.54	0.48972	0.999624
GO:0036294	cellular response to decreased oxygen le...	33	7	6.54	0.48972	0.999624
GO:1903052	positive regulation of proteolysis invol...	33	7	6.54	0.48972	0.999624
GO:2001022	positive regulation of response to DNA d...	33	7	6.54	0.48972	0.999624
GO:0016579	protein deubiquitination	28	6	5.55	0.49037	0.999624
GO:0035249	synaptic transmission, glutamatergic	28	6	5.55	0.49037	0.999624
GO:0043506	regulation of JUN kinase activity	28	6	5.55	0.49037	0.999624
GO:0043648	dicarboxylic acid metabolic process	28	6	5.55	0.49037	0.999624
GO:0046849	bone remodeling	28	6	5.55	0.49037	0.999624
GO:0048708	astrocyte differentiation	28	6	5.55	0.49037	0.999624
GO:0070167	regulation of biomineral tissue developm...	28	6	5.55	0.49037	0.999624
GO:1903035	negative regulation of response to wound...	28	6	5.55	0.49037	0.999624
GO:0003281	ventricular septum development	23	5	4.56	0.49103	0.999624
GO:0017004	cytochrome complex assembly	23	5	4.56	0.49103	0.999624
GO:0019226	transmission of nerve impulse	23	5	4.56	0.49103	0.999624
GO:0019319	hexose biosynthetic process	23	5	4.56	0.49103	0.999624
GO:0036465	synaptic vesicle recycling	23	5	4.56	0.49103	0.999624
GO:0043954	cellular component maintenance	23	5	4.56	0.49103	0.999624
GO:0045453	bone resorption	23	5	4.56	0.49103	0.999624
GO:0070972	protein localization to endoplasmic reti...	23	5	4.56	0.49103	0.999624
GO:0099518	vesicle cytoskeletal trafficking	23	5	4.56	0.49103	0.999624
GO:1901607	alpha-amino acid biosynthetic process	23	5	4.56	0.49103	0.999624
GO:2000573	positive regulation of DNA biosynthetic ...	23	5	4.56	0.49103	0.999624
GO:0001541	ovarian follicle development	18	4	3.57	0.49164	0.999624
GO:0001704	formation of primary germ layer	18	4	3.57	0.49164	0.999624
GO:0002720	positive regulation of cytokine producti...	18	4	3.57	0.49164	0.999624
GO:0006414	translational elongation	18	4	3.57	0.49164	0.999624
GO:0010812	negative regulation of cell-substrate ad...	18	4	3.57	0.49164	0.999624
GO:0015909	long-chain fatty acid transport	18	4	3.57	0.49164	0.999624
GO:0015985	energy coupled proton transport, down el...	18	4	3.57	0.49164	0.999624
GO:0015986	ATP synthesis coupled proton transport	18	4	3.57	0.49164	0.999624
GO:0032371	regulation of sterol transport	18	4	3.57	0.49164	0.999624
GO:0032374	regulation of cholesterol transport	18	4	3.57	0.49164	0.999624
GO:0042743	hydrogen peroxide metabolic process	18	4	3.57	0.49164	0.999624
GO:0050000	chromosome localization	18	4	3.57	0.49164	0.999624
GO:0050854	regulation of antigen receptor-mediated ...	18	4	3.57	0.49164	0.999624
GO:0051303	establishment of chromosome localization	18	4	3.57	0.49164	0.999624
GO:0051983	regulation of chromosome segregation	18	4	3.57	0.49164	0.999624
GO:1902930	regulation of alcohol biosynthetic proce...	18	4	3.57	0.49164	0.999624
GO:0000470	maturation of LSU-rRNA	13	3	2.58	0.49208	0.999624
GO:0006040	amino sugar metabolic process	13	3	2.58	0.49208	0.999624
GO:0006270	DNA replication initiation	13	3	2.58	0.49208	0.999624
GO:0006513	protein monoubiquitination	13	3	2.58	0.49208	0.999624
GO:0006734	NADH metabolic process	13	3	2.58	0.49208	0.999624
GO:0008333	endosome to lysosome transport	13	3	2.58	0.49208	0.999624
GO:0009069	serine family amino acid metabolic proce...	13	3	2.58	0.49208	0.999624
GO:0021695	cerebellar cortex development	13	3	2.58	0.49208	0.999624
GO:0022011	myelination in peripheral nervous system	13	3	2.58	0.49208	0.999624
GO:0030488	tRNA methylation	13	3	2.58	0.49208	0.999624
GO:0030520	intracellular estrogen receptor signalin...	13	3	2.58	0.49208	0.999624
GO:0032292	peripheral nervous system axon ensheathm...	13	3	2.58	0.49208	0.999624
GO:0034508	centromere complex assembly	13	3	2.58	0.49208	0.999624
GO:0035774	positive regulation of insulin secretion...	13	3	2.58	0.49208	0.999624
GO:0042554	superoxide anion generation	13	3	2.58	0.49208	0.999624
GO:0042698	ovulation cycle	13	3	2.58	0.49208	0.999624
GO:0042744	hydrogen peroxide catabolic process	13	3	2.58	0.49208	0.999624
GO:0045823	positive regulation of heart contraction	13	3	2.58	0.49208	0.999624
GO:0045912	negative regulation of carbohydrate meta...	13	3	2.58	0.49208	0.999624
GO:0050919	negative chemotaxis	13	3	2.58	0.49208	0.999624
GO:0055023	positive regulation of cardiac muscle ti...	13	3	2.58	0.49208	0.999624
GO:0061014	positive regulation of mRNA catabolic pr...	13	3	2.58	0.49208	0.999624
GO:0071260	cellular response to mechanical stimulus	13	3	2.58	0.49208	0.999624
GO:0071320	cellular response to cAMP	13	3	2.58	0.49208	0.999624
GO:0071385	cellular response to glucocorticoid stim...	13	3	2.58	0.49208	0.999624
GO:0071985	multivesicular body sorting pathway	13	3	2.58	0.49208	0.999624
GO:0097028	dendritic cell differentiation	13	3	2.58	0.49208	0.999624
GO:0097484	dendrite extension	13	3	2.58	0.49208	0.999624
GO:1902992	negative regulation of amyloid precursor...	13	3	2.58	0.49208	0.999624
GO:1903524	positive regulation of blood circulation	13	3	2.58	0.49208	0.999624
GO:1903573	negative regulation of response to endop...	13	3	2.58	0.49208	0.999624
GO:0045860	positive regulation of protein kinase ac...	124	25	24.58	0.49896	0.999624
GO:0044270	cellular nitrogen compound catabolic pro...	114	23	22.6	0.50052	0.999624
GO:0045765	regulation of angiogenesis	109	22	21.61	0.50135	0.999624
GO:0051129	negative regulation of cellular componen...	220	44	43.62	0.50180	0.999624
GO:0051056	regulation of small GTPase mediated sign...	94	19	18.64	0.50409	0.999624
GO:0008610	lipid biosynthetic process	190	38	37.67	0.50570	0.999624
GO:2000026	regulation of multicellular organismal d...	397	79	78.71	0.50663	0.999624
GO:0001701	in utero embryonic development	165	33	32.71	0.50946	0.999624
GO:0006006	glucose metabolic process	69	14	13.68	0.50987	0.999624
GO:0006403	RNA localization	59	12	11.7	0.51286	0.999624
GO:0006941	striated muscle contraction	59	12	11.7	0.51286	0.999624
GO:0032147	activation of protein kinase activity	59	12	11.7	0.51286	0.999624
GO:0006479	protein methylation	54	11	10.71	0.51458	0.999624
GO:0008213	protein alkylation	54	11	10.71	0.51458	0.999624
GO:0010565	regulation of cellular ketone metabolic ...	44	9	8.72	0.51866	0.999624
GO:0110148	biomineralization	44	9	8.72	0.51866	0.999624
GO:0031401	positive regulation of protein modificat...	287	57	56.9	0.51907	0.999624
GO:0000070	mitotic sister chromatid segregation	39	8	7.73	0.52114	0.999624
GO:0006892	post-Golgi vesicle-mediated transport	39	8	7.73	0.52114	0.999624
GO:0042157	lipoprotein metabolic process	39	8	7.73	0.52114	0.999624
GO:0048640	negative regulation of developmental gro...	39	8	7.73	0.52114	0.999624
GO:0048638	regulation of developmental growth	105	21	20.82	0.52181	0.999624
GO:0045931	positive regulation of mitotic cell cycl...	34	7	6.74	0.52404	0.999624
GO:0050852	T cell receptor signaling pathway	34	7	6.74	0.52404	0.999624
GO:0060419	heart growth	34	7	6.74	0.52404	0.999624
GO:0071229	cellular response to acid chemical	34	7	6.74	0.52404	0.999624
GO:0071675	regulation of mononuclear cell migration	34	7	6.74	0.52404	0.999624
GO:0030855	epithelial cell differentiation	171	34	33.9	0.52411	0.999624
GO:0007420	brain development	166	33	32.91	0.52513	0.999624
GO:2000145	regulation of cell motility	323	64	64.04	0.52607	0.999624
GO:0006942	regulation of striated muscle contractio...	29	6	5.75	0.52753	0.999624
GO:0035904	aorta development	29	6	5.75	0.52753	0.999624
GO:0110149	regulation of biomineralization	29	6	5.75	0.52753	0.999624
GO:0005996	monosaccharide metabolic process	85	17	16.85	0.52789	0.999624
GO:0046578	regulation of Ras protein signal transdu...	85	17	16.85	0.52789	0.999624
GO:0001525	angiogenesis	217	43	43.02	0.53001	0.999624
GO:0051348	negative regulation of transferase activ...	75	15	14.87	0.53162	0.999624
GO:0002275	myeloid cell activation involved in immu...	24	5	4.76	0.53187	0.999624
GO:0002312	B cell activation involved in immune res...	24	5	4.76	0.53187	0.999624
GO:0033209	tumor necrosis factor-mediated signaling...	24	5	4.76	0.53187	0.999624
GO:0045123	cellular extravasation	24	5	4.76	0.53187	0.999624
GO:0046470	phosphatidylcholine metabolic process	24	5	4.76	0.53187	0.999624
GO:1902369	negative regulation of RNA catabolic pro...	24	5	4.76	0.53187	0.999624
GO:1903321	negative regulation of protein modificat...	24	5	4.76	0.53187	0.999624
GO:2000060	positive regulation of ubiquitin-depende...	24	5	4.76	0.53187	0.999624
GO:0007346	regulation of mitotic cell cycle	136	27	26.96	0.53209	0.999624
GO:0033365	protein localization to organelle	273	54	54.13	0.53348	0.999624
GO:0043588	skin development	70	14	13.88	0.53373	0.999624
GO:1902904	negative regulation of supramolecular fi...	70	14	13.88	0.53373	0.999624
GO:0045732	positive regulation of protein catabolic...	65	13	12.89	0.53604	0.999624
GO:0001569	branching involved in blood vessel morph...	19	4	3.77	0.53757	0.999624
GO:0007528	neuromuscular junction development	19	4	3.77	0.53757	0.999624
GO:0007631	feeding behavior	19	4	3.77	0.53757	0.999624
GO:0009066	aspartate family amino acid metabolic pr...	19	4	3.77	0.53757	0.999624
GO:0009161	ribonucleoside monophosphate metabolic p...	19	4	3.77	0.53757	0.999624
GO:0021954	central nervous system neuron developmen...	19	4	3.77	0.53757	0.999624
GO:0033627	cell adhesion mediated by integrin	19	4	3.77	0.53757	0.999624
GO:0034340	response to type I interferon	19	4	3.77	0.53757	0.999624
GO:0042440	pigment metabolic process	19	4	3.77	0.53757	0.999624
GO:0043114	regulation of vascular permeability	19	4	3.77	0.53757	0.999624
GO:0045071	negative regulation of viral genome repl...	19	4	3.77	0.53757	0.999624
GO:0045599	negative regulation of fat cell differen...	19	4	3.77	0.53757	0.999624
GO:0051384	response to glucocorticoid	19	4	3.77	0.53757	0.999624
GO:0060711	labyrinthine layer development	19	4	3.77	0.53757	0.999624
GO:0070059	intrinsic apoptotic signaling pathway in...	19	4	3.77	0.53757	0.999624
GO:0086002	cardiac muscle cell action potential inv...	19	4	3.77	0.53757	0.999624
GO:0097120	receptor localization to synapse	19	4	3.77	0.53757	0.999624
GO:0002440	production of molecular mediator of immu...	60	12	11.9	0.53858	0.999624
GO:0048660	regulation of smooth muscle cell prolife...	60	12	11.9	0.53858	0.999624
GO:0010564	regulation of cell cycle process	172	34	34.1	0.53946	0.999624
GO:0010639	negative regulation of organelle organiz...	111	22	22.01	0.53949	0.999624
GO:1901342	regulation of vasculature development	111	22	22.01	0.53949	0.999624
GO:0000302	response to reactive oxygen species	55	11	10.9	0.54141	0.999624
GO:0009451	RNA modification	55	11	10.9	0.54141	0.999624
GO:0048545	response to steroid hormone	55	11	10.9	0.54141	0.999624
GO:1903829	positive regulation of cellular protein ...	101	20	20.02	0.54305	0.999624
GO:0071219	cellular response to molecule of bacteri...	50	10	9.91	0.54460	0.999624
GO:0001990	regulation of systemic arterial blood pr...	14	3	2.78	0.54564	0.999624
GO:0002639	positive regulation of immunoglobulin pr...	14	3	2.78	0.54564	0.999624
GO:0006378	mRNA polyadenylation	14	3	2.78	0.54564	0.999624
GO:0007129	homologous chromosome pairing at meiosis	14	3	2.78	0.54564	0.999624
GO:0007260	tyrosine phosphorylation of STAT protein	14	3	2.78	0.54564	0.999624
GO:0007588	excretion	14	3	2.78	0.54564	0.999624
GO:0008038	neuron recognition	14	3	2.78	0.54564	0.999624
GO:0009988	cell-cell recognition	14	3	2.78	0.54564	0.999624
GO:0010613	positive regulation of cardiac muscle hy...	14	3	2.78	0.54564	0.999624
GO:0014742	positive regulation of muscle hypertroph...	14	3	2.78	0.54564	0.999624
GO:0016601	Rac protein signal transduction	14	3	2.78	0.54564	0.999624
GO:0016925	protein sumoylation	14	3	2.78	0.54564	0.999624
GO:0019748	secondary metabolic process	14	3	2.78	0.54564	0.999624
GO:0032527	protein exit from endoplasmic reticulum	14	3	2.78	0.54564	0.999624
GO:0033866	nucleoside bisphosphate biosynthetic pro...	14	3	2.78	0.54564	0.999624
GO:0034030	ribonucleoside bisphosphate biosynthetic...	14	3	2.78	0.54564	0.999624
GO:0034033	purine nucleoside bisphosphate biosynthe...	14	3	2.78	0.54564	0.999624
GO:0035025	positive regulation of Rho protein signa...	14	3	2.78	0.54564	0.999624
GO:0038083	peptidyl-tyrosine autophosphorylation	14	3	2.78	0.54564	0.999624
GO:0042509	regulation of tyrosine phosphorylation o...	14	3	2.78	0.54564	0.999624
GO:0043331	response to dsRNA	14	3	2.78	0.54564	0.999624
GO:0043627	response to estrogen	14	3	2.78	0.54564	0.999624
GO:0043631	RNA polyadenylation	14	3	2.78	0.54564	0.999624
GO:0044091	membrane biogenesis	14	3	2.78	0.54564	0.999624
GO:0045103	intermediate filament-based process	14	3	2.78	0.54564	0.999624
GO:0045104	intermediate filament cytoskeleton organ...	14	3	2.78	0.54564	0.999624
GO:0045604	regulation of epidermal cell differentia...	14	3	2.78	0.54564	0.999624
GO:0045777	positive regulation of blood pressure	14	3	2.78	0.54564	0.999624
GO:0046460	neutral lipid biosynthetic process	14	3	2.78	0.54564	0.999624
GO:0046463	acylglycerol biosynthetic process	14	3	2.78	0.54564	0.999624
GO:0048169	regulation of long-term neuronal synapti...	14	3	2.78	0.54564	0.999624
GO:0051293	establishment of spindle localization	14	3	2.78	0.54564	0.999624
GO:0051489	regulation of filopodium assembly	14	3	2.78	0.54564	0.999624
GO:0051653	spindle localization	14	3	2.78	0.54564	0.999624
GO:0051785	positive regulation of nuclear division	14	3	2.78	0.54564	0.999624
GO:0051898	negative regulation of protein kinase B ...	14	3	2.78	0.54564	0.999624
GO:0071364	cellular response to epidermal growth fa...	14	3	2.78	0.54564	0.999624
GO:0071384	cellular response to corticosteroid stim...	14	3	2.78	0.54564	0.999624
GO:0090207	regulation of triglyceride metabolic pro...	14	3	2.78	0.54564	0.999624
GO:0090307	mitotic spindle assembly	14	3	2.78	0.54564	0.999624
GO:0098810	neurotransmitter reuptake	14	3	2.78	0.54564	0.999624
GO:0051248	negative regulation of protein metabolic...	269	53	53.33	0.54669	0.999624
GO:0015711	organic anion transport	91	18	18.04	0.54709	0.999624
GO:1902533	positive regulation of intracellular sig...	264	52	52.34	0.54763	0.999624
GO:0051650	establishment of vesicle localization	45	9	8.92	0.54824	0.999624
GO:0071383	cellular response to steroid hormone sti...	45	9	8.92	0.54824	0.999624
GO:0009719	response to endogenous stimulus	396	78	78.51	0.54874	0.999624
GO:0019318	hexose metabolic process	81	16	16.06	0.55175	0.999624
GO:0006886	intracellular protein transport	305	60	60.47	0.55224	0.999624
GO:0044839	cell cycle G2/M phase transition	40	8	7.93	0.55246	0.999624
GO:0090305	nucleic acid phosphodiester bond hydroly...	40	8	7.93	0.55246	0.999624
GO:0016042	lipid catabolic process	76	15	15.07	0.55437	0.999624
GO:0002684	positive regulation of immune system pro...	224	44	44.41	0.55609	0.999624
GO:1905475	regulation of protein localization to me...	71	14	14.08	0.55722	0.999624
GO:0007009	plasma membrane organization	35	7	6.94	0.55746	0.999624
GO:0007156	homophilic cell adhesion via plasma memb...	35	7	6.94	0.55746	0.999624
GO:0009581	detection of external stimulus	35	7	6.94	0.55746	0.999624
GO:0009582	detection of abiotic stimulus	35	7	6.94	0.55746	0.999624
GO:0043297	apical junction assembly	35	7	6.94	0.55746	0.999624
GO:0051897	positive regulation of protein kinase B ...	35	7	6.94	0.55746	0.999624
GO:0120034	positive regulation of plasma membrane b...	35	7	6.94	0.55746	0.999624
GO:0072507	divalent inorganic cation homeostasis	163	32	32.32	0.55761	0.999624
GO:1903793	positive regulation of anion transport	148	29	29.34	0.56246	0.999624
GO:0031331	positive regulation of cellular cataboli...	102	20	20.22	0.56266	0.999624
GO:0051052	regulation of DNA metabolic process	102	20	20.22	0.56266	0.999624
GO:0006672	ceramide metabolic process	30	6	5.95	0.56353	0.999624
GO:0007044	cell-substrate junction assembly	30	6	5.95	0.56353	0.999624
GO:0016079	synaptic vesicle exocytosis	30	6	5.95	0.56353	0.999624
GO:0035601	protein deacylation	30	6	5.95	0.56353	0.999624
GO:0098732	macromolecule deacylation	30	6	5.95	0.56353	0.999624
GO:0150115	cell-substrate junction organization	30	6	5.95	0.56353	0.999624
GO:0021537	telencephalon development	61	12	12.09	0.56383	0.999624
GO:0048659	smooth muscle cell proliferation	61	12	12.09	0.56383	0.999624
GO:0050878	regulation of body fluid levels	97	19	19.23	0.56508	0.999624
GO:0051222	positive regulation of protein transport	97	19	19.23	0.56508	0.999624
GO:0050867	positive regulation of cell activation	92	18	18.24	0.56767	0.999624
GO:0008217	regulation of blood pressure	56	11	11.1	0.56771	0.999624
GO:0010634	positive regulation of epithelial cell m...	56	11	11.1	0.56771	0.999624
GO:0044092	negative regulation of molecular functio...	281	55	55.71	0.56898	0.999624
GO:0007265	Ras protein signal transduction	128	25	25.38	0.57002	0.999624
GO:0043542	endothelial cell migration	87	17	17.25	0.57045	0.999624
GO:0002200	somatic diversification of immune recept...	25	5	4.96	0.57118	0.999624
GO:0014068	positive regulation of phosphatidylinosi...	25	5	4.96	0.57118	0.999624
GO:0022406	membrane docking	25	5	4.96	0.57118	0.999624
GO:0032088	negative regulation of NF-kappaB transcr...	25	5	4.96	0.57118	0.999624
GO:0035418	protein localization to synapse	25	5	4.96	0.57118	0.999624
GO:0043536	positive regulation of blood vessel endo...	25	5	4.96	0.57118	0.999624
GO:0045132	meiotic chromosome segregation	25	5	4.96	0.57118	0.999624
GO:1901292	nucleoside phosphate catabolic process	25	5	4.96	0.57118	0.999624
GO:0006937	regulation of muscle contraction	51	10	10.11	0.57208	0.999624
GO:0032680	regulation of tumor necrosis factor prod...	51	10	10.11	0.57208	0.999624
GO:0035148	tube formation	51	10	10.11	0.57208	0.999624
GO:0048839	inner ear development	51	10	10.11	0.57208	0.999624
GO:0051100	negative regulation of binding	51	10	10.11	0.57208	0.999624
GO:0032496	response to lipopolysaccharide	77	15	15.27	0.57672	0.999624
GO:0000819	sister chromatid segregation	46	9	9.12	0.57709	0.999624
GO:0034249	negative regulation of cellular amide me...	46	9	9.12	0.57709	0.999624
GO:0045834	positive regulation of lipid metabolic p...	46	9	9.12	0.57709	0.999624
GO:0060041	retina development in camera-type eye	46	9	9.12	0.57709	0.999624
GO:0060048	cardiac muscle contraction	46	9	9.12	0.57709	0.999624
GO:0043112	receptor metabolic process	72	14	14.27	0.58028	0.999624
GO:0071496	cellular response to external stimulus	72	14	14.27	0.58028	0.999624
GO:0098542	defense response to other organism	231	45	45.8	0.58125	0.999624
GO:0002753	cytoplasmic pattern recognition receptor...	20	4	3.97	0.58130	0.999624
GO:0009064	glutamine family amino acid metabolic pr...	20	4	3.97	0.58130	0.999624
GO:0031960	response to corticosteroid	20	4	3.97	0.58130	0.999624
GO:0033143	regulation of intracellular steroid horm...	20	4	3.97	0.58130	0.999624
GO:0043550	regulation of lipid kinase activity	20	4	3.97	0.58130	0.999624
GO:0048008	platelet-derived growth factor receptor ...	20	4	3.97	0.58130	0.999624
GO:0061035	regulation of cartilage development	20	4	3.97	0.58130	0.999624
GO:2000300	regulation of synaptic vesicle exocytosi...	20	4	3.97	0.58130	0.999624
GO:0043123	positive regulation of I-kappaB kinase/N...	41	8	8.13	0.58290	0.999624
GO:0043487	regulation of RNA stability	41	8	8.13	0.58290	0.999624
GO:0051701	biological process involved in interacti...	41	8	8.13	0.58290	0.999624
GO:1902806	regulation of cell cycle G1/S phase tran...	41	8	8.13	0.58290	0.999624
GO:1904019	epithelial cell apoptotic process	41	8	8.13	0.58290	0.999624
GO:0014070	response to organic cyclic compound	180	35	35.69	0.58292	0.999624
GO:0010594	regulation of endothelial cell migration	67	13	13.28	0.58419	0.999624
GO:0015931	nucleobase-containing compound transport	67	13	13.28	0.58419	0.999624
GO:0032446	protein modification by small protein co...	170	33	33.7	0.58651	0.999624
GO:0003013	circulatory system process	165	32	32.71	0.58841	0.999624
GO:0050679	positive regulation of epithelial cell p...	62	12	12.29	0.58853	0.999624
GO:2001020	regulation of response to DNA damage sti...	62	12	12.29	0.58853	0.999624
GO:0045595	regulation of cell differentiation	461	90	91.4	0.58875	0.999624
GO:0002698	negative regulation of immune effector p...	36	7	7.14	0.58979	0.999624
GO:0016571	histone methylation	36	7	7.14	0.58979	0.999624
GO:0030879	mammary gland development	36	7	7.14	0.58979	0.999624
GO:0048661	positive regulation of smooth muscle cel...	36	7	7.14	0.58979	0.999624
GO:0050864	regulation of B cell activation	36	7	7.14	0.58979	0.999624
GO:0051028	mRNA transport	36	7	7.14	0.58979	0.999624
GO:0009790	embryo development	344	67	68.2	0.59010	0.999624
GO:0032270	positive regulation of cellular protein ...	395	77	78.31	0.59051	0.999624
GO:0018209	peptidyl-serine modification	88	17	17.45	0.59120	0.999624
GO:0001817	regulation of cytokine production	196	38	38.86	0.59205	0.999624
GO:0060562	epithelial tube morphogenesis	119	23	23.59	0.59229	0.999624
GO:0007626	locomotory behavior	57	11	11.3	0.59337	0.999624
GO:0050821	protein stabilization	57	11	11.3	0.59337	0.999624
GO:0090316	positive regulation of intracellular pro...	57	11	11.3	0.59337	0.999624
GO:0009792	embryo development ending in birth or eg...	232	45	46	0.59422	0.999624
GO:0060249	anatomical structure homeostasis	114	22	22.6	0.59501	0.999624
GO:1903131	mononuclear cell differentiation	114	22	22.6	0.59501	0.999624
GO:0009607	response to biotic stimulus	319	62	63.25	0.59566	0.999624
GO:0001504	neurotransmitter uptake	15	3	2.97	0.59574	0.999624
GO:0001961	positive regulation of cytokine-mediated...	15	3	2.97	0.59574	0.999624
GO:0001974	blood vessel remodeling	15	3	2.97	0.59574	0.999624
GO:0007405	neuroblast proliferation	15	3	2.97	0.59574	0.999624
GO:0007520	myoblast fusion	15	3	2.97	0.59574	0.999624
GO:0009126	purine nucleoside monophosphate metaboli...	15	3	2.97	0.59574	0.999624
GO:0009167	purine ribonucleoside monophosphate meta...	15	3	2.97	0.59574	0.999624
GO:0009311	oligosaccharide metabolic process	15	3	2.97	0.59574	0.999624
GO:0014044	Schwann cell development	15	3	2.97	0.59574	0.999624
GO:0021761	limbic system development	15	3	2.97	0.59574	0.999624
GO:0030501	positive regulation of bone mineralizati...	15	3	2.97	0.59574	0.999624
GO:0031057	negative regulation of histone modificat...	15	3	2.97	0.59574	0.999624
GO:0035690	cellular response to drug	15	3	2.97	0.59574	0.999624
GO:0043618	regulation of transcription from RNA pol...	15	3	2.97	0.59574	0.999624
GO:0045911	positive regulation of DNA recombination	15	3	2.97	0.59574	0.999624
GO:0046637	regulation of alpha-beta T cell differen...	15	3	2.97	0.59574	0.999624
GO:0047496	vesicle transport along microtubule	15	3	2.97	0.59574	0.999624
GO:0048821	erythrocyte development	15	3	2.97	0.59574	0.999624
GO:0050432	catecholamine secretion	15	3	2.97	0.59574	0.999624
GO:0050433	regulation of catecholamine secretion	15	3	2.97	0.59574	0.999624
GO:0060632	regulation of microtubule-based movement	15	3	2.97	0.59574	0.999624
GO:0071715	icosanoid transport	15	3	2.97	0.59574	0.999624
GO:0090199	regulation of release of cytochrome c fr...	15	3	2.97	0.59574	0.999624
GO:0090218	positive regulation of lipid kinase acti...	15	3	2.97	0.59574	0.999624
GO:0140354	lipid import into cell	15	3	2.97	0.59574	0.999624
GO:1902001	fatty acid transmembrane transport	15	3	2.97	0.59574	0.999624
GO:1903051	negative regulation of proteolysis invol...	15	3	2.97	0.59574	0.999624
GO:1904036	negative regulation of epithelial cell a...	15	3	2.97	0.59574	0.999624
GO:1904707	positive regulation of vascular associat...	15	3	2.97	0.59574	0.999624
GO:0002694	regulation of leukocyte activation	145	28	28.75	0.59686	0.999624
GO:0034655	nucleobase-containing compound catabolic...	109	21	21.61	0.59790	0.999624
GO:0002027	regulation of heart rate	31	6	6.15	0.59816	0.999624
GO:0007052	mitotic spindle organization	31	6	6.15	0.59816	0.999624
GO:0010212	response to ionizing radiation	31	6	6.15	0.59816	0.999624
GO:0032091	negative regulation of protein binding	31	6	6.15	0.59816	0.999624
GO:0046620	regulation of organ growth	31	6	6.15	0.59816	0.999624
GO:0055017	cardiac muscle tissue growth	31	6	6.15	0.59816	0.999624
GO:1904377	positive regulation of protein localizat...	31	6	6.15	0.59816	0.999624
GO:0008016	regulation of heart contraction	52	10	10.31	0.59883	0.999624
GO:0016331	morphogenesis of embryonic epithelium	52	10	10.31	0.59883	0.999624
GO:1903555	regulation of tumor necrosis factor supe...	52	10	10.31	0.59883	0.999624
GO:0030100	regulation of endocytosis	73	14	14.47	0.60284	0.999624
GO:0043408	regulation of MAPK cascade	202	39	40.05	0.60412	0.999624
GO:0010256	endomembrane system organization	130	25	25.77	0.60427	0.999624
GO:0040012	regulation of locomotion	330	64	65.43	0.60430	0.999624
GO:0045088	regulation of innate immune response	47	9	9.32	0.60508	0.999624
GO:0051648	vesicle localization	47	9	9.32	0.60508	0.999624
GO:0071222	cellular response to lipopolysaccharide	47	9	9.32	0.60508	0.999624
GO:1990542	mitochondrial transmembrane transport	47	9	9.32	0.60508	0.999624
GO:0001667	ameboidal-type cell migration	161	31	31.92	0.60571	0.999624
GO:0006260	DNA replication	94	18	18.64	0.60775	0.999624
GO:0060326	cell chemotaxis	94	18	18.64	0.60775	0.999624
GO:0001578	microtubule bundle formation	26	5	5.15	0.60869	0.999624
GO:0002042	cell migration involved in sprouting ang...	26	5	5.15	0.60869	0.999624
GO:0006476	protein deacetylation	26	5	5.15	0.60869	0.999624
GO:0046579	positive regulation of Ras protein signa...	26	5	5.15	0.60869	0.999624
GO:0046888	negative regulation of hormone secretion	26	5	5.15	0.60869	0.999624
GO:0048010	vascular endothelial growth factor recep...	26	5	5.15	0.60869	0.999624
GO:0051057	positive regulation of small GTPase medi...	26	5	5.15	0.60869	0.999624
GO:0061028	establishment of endothelial barrier	26	5	5.15	0.60869	0.999624
GO:0090277	positive regulation of peptide hormone s...	26	5	5.15	0.60869	0.999624
GO:1904591	positive regulation of protein import	26	5	5.15	0.60869	0.999624
GO:0060322	head development	187	36	37.07	0.60981	0.999624
GO:0009896	positive regulation of catabolic process	120	23	23.79	0.60988	0.999624
GO:0006955	immune response	346	67	68.6	0.61147	0.999624
GO:0006650	glycerophospholipid metabolic process	89	17	17.65	0.61153	0.999624
GO:0043405	regulation of MAP kinase activity	89	17	17.65	0.61153	0.999624
GO:0000910	cytokinesis	42	8	8.33	0.61233	0.999624
GO:0007269	neurotransmitter secretion	42	8	8.33	0.61233	0.999624
GO:0015908	fatty acid transport	42	8	8.33	0.61233	0.999624
GO:0030038	contractile actin filament bundle assemb...	42	8	8.33	0.61233	0.999624
GO:0031570	DNA integrity checkpoint	42	8	8.33	0.61233	0.999624
GO:0043149	stress fiber assembly	42	8	8.33	0.61233	0.999624
GO:0045185	maintenance of protein location	42	8	8.33	0.61233	0.999624
GO:0071103	DNA conformation change	42	8	8.33	0.61233	0.999624
GO:0099643	signal release from synapse	42	8	8.33	0.61233	0.999624
GO:1902850	microtubule cytoskeleton organization in...	42	8	8.33	0.61233	0.999624
GO:1903076	regulation of protein localization to pl...	42	8	8.33	0.61233	0.999624
GO:1905477	positive regulation of protein localizat...	42	8	8.33	0.61233	0.999624
GO:0060348	bone development	63	12	12.49	0.61260	0.999624
GO:0050877	nervous system process	249	48	49.37	0.61472	0.999624
GO:0051247	positive regulation of protein metabolic...	423	82	83.86	0.61522	0.999624
GO:0070661	leukocyte proliferation	84	16	16.65	0.61560	0.999624
GO:0097193	intrinsic apoptotic signaling pathway	84	16	16.65	0.61560	0.999624
GO:0001568	blood vessel development	280	54	55.51	0.61748	0.999624
GO:0048871	multicellular organismal homeostasis	136	26	26.96	0.61813	0.999624
GO:0072594	establishment of protein localization to...	136	26	26.96	0.61813	0.999624
GO:0050731	positive regulation of peptidyl-tyrosine...	58	11	11.5	0.61832	0.999624
GO:0070374	positive regulation of ERK1 and ERK2 cas...	58	11	11.5	0.61832	0.999624
GO:1901617	organic hydroxy compound biosynthetic pr...	58	11	11.5	0.61832	0.999624
GO:0000096	sulfur amino acid metabolic process	10	2	1.98	0.61918	0.999624
GO:0000963	mitochondrial RNA processing	10	2	1.98	0.61918	0.999624
GO:0002043	blood vessel endothelial cell proliferat...	10	2	1.98	0.61918	0.999624
GO:0003081	regulation of systemic arterial blood pr...	10	2	1.98	0.61918	0.999624
GO:0006085	acetyl-CoA biosynthetic process	10	2	1.98	0.61918	0.999624
GO:0006730	one-carbon metabolic process	10	2	1.98	0.61918	0.999624
GO:0006903	vesicle targeting	10	2	1.98	0.61918	0.999624
GO:0007257	activation of JUN kinase activity	10	2	1.98	0.61918	0.999624
GO:0009309	amine biosynthetic process	10	2	1.98	0.61918	0.999624
GO:0010543	regulation of platelet activation	10	2	1.98	0.61918	0.999624
GO:0010664	negative regulation of striated muscle c...	10	2	1.98	0.61918	0.999624
GO:0010763	positive regulation of fibroblast migrat...	10	2	1.98	0.61918	0.999624
GO:0010829	negative regulation of glucose transmemb...	10	2	1.98	0.61918	0.999624
GO:0010955	negative regulation of protein processin...	10	2	1.98	0.61918	0.999624
GO:0014888	striated muscle adaptation	10	2	1.98	0.61918	0.999624
GO:0015874	norepinephrine transport	10	2	1.98	0.61918	0.999624
GO:0016073	snRNA metabolic process	10	2	1.98	0.61918	0.999624
GO:0018126	protein hydroxylation	10	2	1.98	0.61918	0.999624
GO:0030890	positive regulation of B cell proliferat...	10	2	1.98	0.61918	0.999624
GO:0031062	positive regulation of histone methylati...	10	2	1.98	0.61918	0.999624
GO:0031279	regulation of cyclase activity	10	2	1.98	0.61918	0.999624
GO:0032332	positive regulation of chondrocyte diffe...	10	2	1.98	0.61918	0.999624
GO:0034204	lipid translocation	10	2	1.98	0.61918	0.999624
GO:0035024	negative regulation of Rho protein signa...	10	2	1.98	0.61918	0.999624
GO:0042401	cellular biogenic amine biosynthetic pro...	10	2	1.98	0.61918	0.999624
GO:0042832	defense response to protozoan	10	2	1.98	0.61918	0.999624
GO:0042908	xenobiotic transport	10	2	1.98	0.61918	0.999624
GO:0043032	positive regulation of macrophage activa...	10	2	1.98	0.61918	0.999624
GO:0045332	phospholipid translocation	10	2	1.98	0.61918	0.999624
GO:0045814	negative regulation of gene expression, ...	10	2	1.98	0.61918	0.999624
GO:0045940	positive regulation of steroid metabolic...	10	2	1.98	0.61918	0.999624
GO:0045981	positive regulation of nucleotide metabo...	10	2	1.98	0.61918	0.999624
GO:0046686	response to cadmium ion	10	2	1.98	0.61918	0.999624
GO:0048266	behavioral response to pain	10	2	1.98	0.61918	0.999624
GO:0050891	multicellular organismal water homeostas...	10	2	1.98	0.61918	0.999624
GO:0051220	cytoplasmic sequestering of protein	10	2	1.98	0.61918	0.999624
GO:0051354	negative regulation of oxidoreductase ac...	10	2	1.98	0.61918	0.999624
GO:0061036	positive regulation of cartilage develop...	10	2	1.98	0.61918	0.999624
GO:0061437	renal system vasculature development	10	2	1.98	0.61918	0.999624
GO:0061440	kidney vasculature development	10	2	1.98	0.61918	0.999624
GO:0070670	response to interleukin-4	10	2	1.98	0.61918	0.999624
GO:0070979	protein K11-linked ubiquitination	10	2	1.98	0.61918	0.999624
GO:0070988	demethylation	10	2	1.98	0.61918	0.999624
GO:0072012	glomerulus vasculature development	10	2	1.98	0.61918	0.999624
GO:0099622	cardiac muscle cell membrane repolarizat...	10	2	1.98	0.61918	0.999624
GO:1900078	positive regulation of cellular response...	10	2	1.98	0.61918	0.999624
GO:1900544	positive regulation of purine nucleotide...	10	2	1.98	0.61918	0.999624
GO:1900744	regulation of p38MAPK cascade	10	2	1.98	0.61918	0.999624
GO:1901976	regulation of cell cycle checkpoint	10	2	1.98	0.61918	0.999624
GO:1901998	toxin transport	10	2	1.98	0.61918	0.999624
GO:1902235	regulation of endoplasmic reticulum stre...	10	2	1.98	0.61918	0.999624
GO:1903318	negative regulation of protein maturatio...	10	2	1.98	0.61918	0.999624
GO:1903580	positive regulation of ATP metabolic pro...	10	2	1.98	0.61918	0.999624
GO:1905207	regulation of cardiocyte differentiation	10	2	1.98	0.61918	0.999624
GO:2000352	negative regulation of endothelial cell ...	10	2	1.98	0.61918	0.999624
GO:0003018	vascular process in circulatory system	79	15	15.66	0.62002	0.999624
GO:0018105	peptidyl-serine phosphorylation	79	15	15.66	0.62002	0.999624
GO:0097529	myeloid leukocyte migration	79	15	15.66	0.62002	0.999624
GO:0014902	myotube differentiation	37	7	7.34	0.62090	0.999624
GO:0042310	vasoconstriction	37	7	7.34	0.62090	0.999624
GO:0006099	tricarboxylic acid cycle	21	4	4.16	0.62254	0.999624
GO:0006940	regulation of smooth muscle contraction	21	4	4.16	0.62254	0.999624
GO:0008589	regulation of smoothened signaling pathw...	21	4	4.16	0.62254	0.999624
GO:0016445	somatic diversification of immunoglobuli...	21	4	4.16	0.62254	0.999624
GO:0021549	cerebellum development	21	4	4.16	0.62254	0.999624
GO:0034401	chromatin organization involved in regul...	21	4	4.16	0.62254	0.999624
GO:0043489	RNA stabilization	21	4	4.16	0.62254	0.999624
GO:0045744	negative regulation of G protein-coupled...	21	4	4.16	0.62254	0.999624
GO:0046173	polyol biosynthetic process	21	4	4.16	0.62254	0.999624
GO:0048662	negative regulation of smooth muscle cel...	21	4	4.16	0.62254	0.999624
GO:0071622	regulation of granulocyte chemotaxis	21	4	4.16	0.62254	0.999624
GO:1904951	positive regulation of establishment of ...	100	19	19.83	0.62326	0.999624
GO:0006629	lipid metabolic process	383	74	75.93	0.62386	0.999624
GO:0022904	respiratory electron transport chain	53	10	10.51	0.62477	0.999624
GO:0032640	tumor necrosis factor production	53	10	10.51	0.62477	0.999624
GO:0006401	RNA catabolic process	74	14	14.67	0.62484	0.999624
GO:0061448	connective tissue development	74	14	14.67	0.62484	0.999624
GO:0043410	positive regulation of MAPK cascade	147	28	29.14	0.62852	0.999624
GO:0051051	negative regulation of transport	147	28	29.14	0.62852	0.999624
GO:0010506	regulation of autophagy	69	13	13.68	0.63013	0.999624
GO:1903320	regulation of protein modification by sm...	69	13	13.68	0.63013	0.999624
GO:2001234	negative regulation of apoptotic signali...	69	13	13.68	0.63013	0.999624
GO:0007224	smoothened signaling pathway	32	6	6.34	0.63127	0.999624
GO:0045619	regulation of lymphocyte differentiation	48	9	9.52	0.63212	0.999624
GO:0050806	positive regulation of synaptic transmis...	48	9	9.52	0.63212	0.999624
GO:0050865	regulation of cell activation	158	30	31.33	0.63828	0.999624
GO:0001837	epithelial to mesenchymal transition	43	8	8.53	0.64064	0.999624
GO:0002695	negative regulation of leukocyte activat...	43	8	8.53	0.64064	0.999624
GO:0006888	endoplasmic reticulum to Golgi vesicle-m...	43	8	8.53	0.64064	0.999624
GO:0042129	regulation of T cell proliferation	43	8	8.53	0.64064	0.999624
GO:0002237	response to molecule of bacterial origin	80	15	15.86	0.64086	0.999624
GO:0000387	spliceosomal snRNP assembly	16	3	3.17	0.64209	0.999624
GO:0006858	extracellular transport	16	3	3.17	0.64209	0.999624
GO:0006890	retrograde vesicle-mediated transport, G...	16	3	3.17	0.64209	0.999624
GO:0010665	regulation of cardiac muscle cell apopto...	16	3	3.17	0.64209	0.999624
GO:0031638	zymogen activation	16	3	3.17	0.64209	0.999624
GO:0032413	negative regulation of ion transmembrane...	16	3	3.17	0.64209	0.999624
GO:0034121	regulation of toll-like receptor signali...	16	3	3.17	0.64209	0.999624
GO:0045143	homologous chromosome segregation	16	3	3.17	0.64209	0.999624
GO:0045214	sarcomere organization	16	3	3.17	0.64209	0.999624
GO:0046456	icosanoid biosynthetic process	16	3	3.17	0.64209	0.999624
GO:0046834	lipid phosphorylation	16	3	3.17	0.64209	0.999624
GO:0050805	negative regulation of synaptic transmis...	16	3	3.17	0.64209	0.999624
GO:0050918	positive chemotaxis	16	3	3.17	0.64209	0.999624
GO:0050922	negative regulation of chemotaxis	16	3	3.17	0.64209	0.999624
GO:0060337	type I interferon signaling pathway	16	3	3.17	0.64209	0.999624
GO:0070169	positive regulation of biomineral tissue...	16	3	3.17	0.64209	0.999624
GO:0071357	cellular response to type I interferon	16	3	3.17	0.64209	0.999624
GO:0086091	regulation of heart rate by cardiac cond...	16	3	3.17	0.64209	0.999624
GO:0003158	endothelium development	59	11	11.7	0.64248	0.999624
GO:0031668	cellular response to extracellular stimu...	59	11	11.7	0.64248	0.999624
GO:1902115	regulation of organelle assembly	59	11	11.7	0.64248	0.999624
GO:0002718	regulation of cytokine production involv...	27	5	5.35	0.64423	0.999624
GO:0015918	sterol transport	27	5	5.35	0.64423	0.999624
GO:0030301	cholesterol transport	27	5	5.35	0.64423	0.999624
GO:0033559	unsaturated fatty acid metabolic process	27	5	5.35	0.64423	0.999624
GO:0034968	histone lysine methylation	27	5	5.35	0.64423	0.999624
GO:0045089	positive regulation of innate immune res...	27	5	5.35	0.64423	0.999624
GO:0050886	endocrine process	27	5	5.35	0.64423	0.999624
GO:0055117	regulation of cardiac muscle contraction	27	5	5.35	0.64423	0.999624
GO:0060349	bone morphogenesis	27	5	5.35	0.64423	0.999624
GO:0071230	cellular response to amino acid stimulus	27	5	5.35	0.64423	0.999624
GO:0016477	cell migration	457	88	90.61	0.64628	0.999624
GO:0046907	intracellular transport	457	88	90.61	0.64628	0.999624
GO:0043122	regulation of I-kappaB kinase/NF-kappaB ...	54	10	10.71	0.64981	0.999624
GO:0050657	nucleic acid transport	54	10	10.71	0.64981	0.999624
GO:0050658	RNA transport	54	10	10.71	0.64981	0.999624
GO:0051236	establishment of RNA localization	54	10	10.71	0.64981	0.999624
GO:0051896	regulation of protein kinase B signaling	54	10	10.71	0.64981	0.999624
GO:0071706	tumor necrosis factor superfamily cytoki...	54	10	10.71	0.64981	0.999624
GO:0035239	tube morphogenesis	324	62	64.24	0.64981	0.999624
GO:0010876	lipid localization	138	26	27.36	0.65012	0.999624
GO:0006275	regulation of DNA replication	38	7	7.53	0.65066	0.999624
GO:0006997	nucleus organization	38	7	7.53	0.65066	0.999624
GO:0007369	gastrulation	38	7	7.53	0.65066	0.999624
GO:0008630	intrinsic apoptotic signaling pathway in...	38	7	7.53	0.65066	0.999624
GO:0030534	adult behavior	38	7	7.53	0.65066	0.999624
GO:0046165	alcohol biosynthetic process	38	7	7.53	0.65066	0.999624
GO:1900182	positive regulation of protein localizat...	38	7	7.53	0.65066	0.999624
GO:1902652	secondary alcohol metabolic process	38	7	7.53	0.65066	0.999624
GO:0006914	autophagy	112	21	22.21	0.65154	0.999624
GO:0061919	process utilizing autophagic mechanism	112	21	22.21	0.65154	0.999624
GO:0006119	oxidative phosphorylation	70	13	13.88	0.65211	0.999624
GO:0043207	response to external biotic stimulus	314	60	62.25	0.65284	0.999624
GO:0051707	response to other organism	314	60	62.25	0.65284	0.999624
GO:0007264	small GTPase mediated signal transductio...	159	30	31.52	0.65302	0.999624
GO:0001775	cell activation	273	52	54.13	0.65512	0.999624
GO:0008015	blood circulation	154	29	30.53	0.65597	0.999624
GO:0016567	protein ubiquitination	154	29	30.53	0.65597	0.999624
GO:0045321	leukocyte activation	237	45	46.99	0.65670	0.999624
GO:1901615	organic hydroxy compound metabolic proce...	128	24	25.38	0.65693	0.999624
GO:0014065	phosphatidylinositol 3-kinase signaling	49	9	9.71	0.65814	0.999624
GO:0022408	negative regulation of cell-cell adhesio...	49	9	9.71	0.65814	0.999624
GO:0045807	positive regulation of endocytosis	49	9	9.71	0.65814	0.999624
GO:0031503	protein-containing complex localization	81	15	16.06	0.66112	0.999624
GO:0000768	syncytium formation by plasma membrane f...	22	4	4.36	0.66112	0.999624
GO:0006949	syncytium formation	22	4	4.36	0.66112	0.999624
GO:0007338	single fertilization	22	4	4.36	0.66112	0.999624
GO:0031397	negative regulation of protein ubiquitin...	22	4	4.36	0.66112	0.999624
GO:0046580	negative regulation of Ras protein signa...	22	4	4.36	0.66112	0.999624
GO:0072384	organelle transport along microtubule	22	4	4.36	0.66112	0.999624
GO:0099637	neurotransmitter receptor transport	22	4	4.36	0.66112	0.999624
GO:0140253	cell-cell fusion	22	4	4.36	0.66112	0.999624
GO:1901655	cellular response to ketone	22	4	4.36	0.66112	0.999624
GO:1905897	regulation of response to endoplasmic re...	22	4	4.36	0.66112	0.999624
GO:0030183	B cell differentiation	33	6	6.54	0.66273	0.999624
GO:0032434	regulation of proteasomal ubiquitin-depe...	33	6	6.54	0.66273	0.999624
GO:0042632	cholesterol homeostasis	33	6	6.54	0.66273	0.999624
GO:0045638	negative regulation of myeloid cell diff...	33	6	6.54	0.66273	0.999624
GO:0055092	sterol homeostasis	33	6	6.54	0.66273	0.999624
GO:1903008	organelle disassembly	33	6	6.54	0.66273	0.999624
GO:0046486	glycerolipid metabolic process	118	22	23.39	0.66449	0.999624
GO:0007596	blood coagulation	60	11	11.9	0.66581	0.999624
GO:0038061	NIK/NF-kappaB signaling	44	8	8.72	0.66774	0.999624
GO:1903322	positive regulation of protein modificat...	44	8	8.72	0.66774	0.999624
GO:0051249	regulation of lymphocyte activation	113	21	22.4	0.66861	0.999624
GO:0070371	ERK1 and ERK2 cascade	92	17	18.24	0.66959	0.999624
GO:0000132	establishment of mitotic spindle orienta...	11	2	2.18	0.67303	0.999624
GO:0001562	response to protozoan	11	2	2.18	0.67303	0.999624
GO:0002704	negative regulation of leukocyte mediate...	11	2	2.18	0.67303	0.999624
GO:0003009	skeletal muscle contraction	11	2	2.18	0.67303	0.999624
GO:0006826	iron ion transport	11	2	2.18	0.67303	0.999624
GO:0007431	salivary gland development	11	2	2.18	0.67303	0.999624
GO:0009262	deoxyribonucleotide metabolic process	11	2	2.18	0.67303	0.999624
GO:0009394	2'-deoxyribonucleotide metabolic process	11	2	2.18	0.67303	0.999624
GO:0009620	response to fungus	11	2	2.18	0.67303	0.999624
GO:0010559	regulation of glycoprotein biosynthetic ...	11	2	2.18	0.67303	0.999624
GO:0010677	negative regulation of cellular carbohyd...	11	2	2.18	0.67303	0.999624
GO:0010714	positive regulation of collagen metaboli...	11	2	2.18	0.67303	0.999624
GO:0010742	macrophage derived foam cell differentia...	11	2	2.18	0.67303	0.999624
GO:0010800	positive regulation of peptidyl-threonin...	11	2	2.18	0.67303	0.999624
GO:0016126	sterol biosynthetic process	11	2	2.18	0.67303	0.999624
GO:0017144	drug metabolic process	11	2	2.18	0.67303	0.999624
GO:0019692	deoxyribose phosphate metabolic process	11	2	2.18	0.67303	0.999624
GO:0030858	positive regulation of epithelial cell d...	11	2	2.18	0.67303	0.999624
GO:0031146	SCF-dependent proteasomal ubiquitin-depe...	11	2	2.18	0.67303	0.999624
GO:0032373	positive regulation of sterol transport	11	2	2.18	0.67303	0.999624
GO:0032376	positive regulation of cholesterol trans...	11	2	2.18	0.67303	0.999624
GO:0032509	endosome transport via multivesicular bo...	11	2	2.18	0.67303	0.999624
GO:0032928	regulation of superoxide anion generatio...	11	2	2.18	0.67303	0.999624
GO:0032967	positive regulation of collagen biosynth...	11	2	2.18	0.67303	0.999624
GO:0033144	negative regulation of intracellular ste...	11	2	2.18	0.67303	0.999624
GO:0034123	positive regulation of toll-like recepto...	11	2	2.18	0.67303	0.999624
GO:0034367	protein-containing complex remodeling	11	2	2.18	0.67303	0.999624
GO:0039529	RIG-I signaling pathway	11	2	2.18	0.67303	0.999624
GO:0040001	establishment of mitotic spindle localiz...	11	2	2.18	0.67303	0.999624
GO:0042531	positive regulation of tyrosine phosphor...	11	2	2.18	0.67303	0.999624
GO:0043276	anoikis	11	2	2.18	0.67303	0.999624
GO:0045581	negative regulation of T cell differenti...	11	2	2.18	0.67303	0.999624
GO:0045737	positive regulation of cyclin-dependent ...	11	2	2.18	0.67303	0.999624
GO:0045880	positive regulation of smoothened signal...	11	2	2.18	0.67303	0.999624
GO:0046320	regulation of fatty acid oxidation	11	2	2.18	0.67303	0.999624
GO:0046475	glycerophospholipid catabolic process	11	2	2.18	0.67303	0.999624
GO:0046636	negative regulation of alpha-beta T cell...	11	2	2.18	0.67303	0.999624
GO:0051125	regulation of actin nucleation	11	2	2.18	0.67303	0.999624
[truncated: 1,393 more rows]

## Sheet: cl3
GO.ID	Term	Annotated	Significant	Expected	classicFisher	BH
GO:0046825	regulation of protein export from nucleu...	12	7	1.32	9e-05	0.1516
GO:0034470	ncRNA processing	150	32	16.5	0.00014	0.1516
GO:0016072	rRNA metabolic process	88	22	9.68	0.00015	0.1516
GO:0006364	rRNA processing	86	21	9.46	0.00029	0.21982
GO:0034660	ncRNA metabolic process	181	35	19.91	0.00051	0.309264
GO:0046824	positive regulation of nucleocytoplasmic...	29	10	3.19	0.00068	0.329189
GO:0006396	RNA processing	307	52	33.77	0.00076	0.329189
GO:1900182	positive regulation of protein localizat...	38	11	4.18	0.00192	0.72768
GO:0030490	maturation of SSU-rRNA	24	8	2.64	0.00301	0.99997
GO:0042254	ribosome biogenesis	119	23	13.09	0.00459	0.99997
GO:0070201	regulation of establishment of protein l...	183	32	20.13	0.00477	0.99997
GO:1904951	positive regulation of establishment of ...	100	20	11	0.00537	0.99997
GO:0009451	RNA modification	55	13	6.05	0.00552	0.99997
GO:1900180	regulation of protein localization to nu...	49	12	5.39	0.00559	0.99997
GO:0051223	regulation of protein transport	179	31	19.69	0.00629	0.99997
GO:0000466	maturation of 5.8S rRNA from tricistroni...	12	5	1.32	0.00647	0.99997
GO:0042307	positive regulation of protein import in...	22	7	2.42	0.00729	0.99997
GO:0000462	maturation of SSU-rRNA from tricistronic...	17	6	1.87	0.00736	0.99997
GO:0006446	regulation of translational initiation	17	6	1.87	0.00736	0.99997
GO:0090316	positive regulation of intracellular pro...	57	13	6.27	0.00759	0.99997
GO:0050778	positive regulation of immune response	117	22	12.87	0.00770	0.99997
GO:0002250	adaptive immune response	97	19	10.67	0.00827	0.99997
GO:0051222	positive regulation of protein transport	97	19	10.67	0.00827	0.99997
GO:0006400	tRNA modification	34	9	3.74	0.00926	0.99997
GO:0046822	regulation of nucleocytoplasmic transpor...	46	11	5.06	0.00946	0.99997
GO:1901264	carbohydrate derivative transport	23	7	2.53	0.00950	0.99997
GO:0090087	regulation of peptide transport	185	31	20.35	0.01017	0.99997
GO:0022613	ribonucleoprotein complex biogenesis	156	27	17.16	0.01050	0.99997
GO:0002699	positive regulation of immune effector p...	60	13	6.6	0.01179	0.99997
GO:0060760	positive regulation of response to cytok...	19	6	2.09	0.01333	0.99997
GO:1901796	regulation of signal transduction by p53...	19	6	2.09	0.01333	0.99997
GO:0033003	regulation of mast cell activation	14	5	1.54	0.01358	0.99997
GO:0033157	regulation of intracellular protein tran...	81	16	8.91	0.01361	0.99997
GO:0002253	activation of immune response	69	14	7.59	0.01621	0.99997
GO:0002697	regulation of immune effector process	104	19	11.44	0.01716	0.99997
GO:0009409	response to cold	10	4	1.1	0.01768	0.99997
GO:0021591	ventricular system development	10	4	1.1	0.01768	0.99997
GO:0032435	negative regulation of proteasomal ubiqu...	10	4	1.1	0.01768	0.99997
GO:1901799	negative regulation of proteasomal prote...	10	4	1.1	0.01768	0.99997
GO:1903793	positive regulation of anion transport	148	25	16.28	0.01807	0.99997
GO:0019882	antigen processing and presentation	26	7	2.86	0.01908	0.99997
GO:1904591	positive regulation of protein import	26	7	2.86	0.01908	0.99997
GO:0044070	regulation of anion transport	271	41	29.81	0.01924	0.99997
GO:0006690	icosanoid metabolic process	32	8	3.52	0.01959	0.99997
GO:0042274	ribosomal small subunit biogenesis	32	8	3.52	0.01959	0.99997
GO:0006417	regulation of translation	113	20	12.43	0.02042	0.99997
GO:0002443	leukocyte mediated immunity	85	16	9.35	0.02111	0.99997
GO:0045944	positive regulation of transcription by ...	281	42	30.91	0.02171	0.99997
GO:0060411	cardiac septum morphogenesis	21	6	2.31	0.02205	0.99997
GO:0072331	signal transduction by p53 class mediato...	39	9	4.29	0.02278	0.99997
GO:0032388	positive regulation of intracellular tra...	72	14	7.92	0.02306	0.99997
GO:0090501	RNA phosphodiester bond hydrolysis	27	7	2.97	0.02339	0.99997
GO:0009895	negative regulation of catabolic process	86	16	9.46	0.02340	0.99997
GO:0034121	regulation of toll-like receptor signali...	16	5	1.76	0.02462	0.99997
GO:0010043	response to zinc ion	11	4	1.21	0.02541	0.99997
GO:0010573	vascular endothelial growth factor produ...	11	4	1.21	0.02541	0.99997
GO:0060964	regulation of gene silencing by miRNA	11	4	1.21	0.02541	0.99997
GO:1900015	regulation of cytokine production involv...	11	4	1.21	0.02541	0.99997
GO:1903579	negative regulation of ATP metabolic pro...	11	4	1.21	0.02541	0.99997
GO:0050776	regulation of immune response	168	27	18.48	0.02627	0.99997
GO:0010608	posttranscriptional regulation of gene e...	153	25	16.83	0.02643	0.99997
GO:0002532	production of molecular mediator involve...	22	6	2.42	0.02759	0.99997
GO:0042306	regulation of protein import into nucleu...	28	7	3.08	0.02832	0.99997
GO:0009266	response to temperature stimulus	47	10	5.17	0.02887	0.99997
GO:0042273	ribosomal large subunit biogenesis	29	7	3.19	0.03392	0.99997
GO:0002279	mast cell activation involved in immune ...	12	4	1.32	0.03488	0.99997
GO:0002534	cytokine production involved in inflamma...	12	4	1.32	0.03488	0.99997
GO:0006505	GPI anchor metabolic process	12	4	1.32	0.03488	0.99997
GO:0006506	GPI anchor biosynthetic process	12	4	1.32	0.03488	0.99997
GO:0034405	response to fluid shear stress	12	4	1.32	0.03488	0.99997
GO:0048002	antigen processing and presentation of p...	12	4	1.32	0.03488	0.99997
GO:1990126	retrograde transport, endosome to plasma...	12	4	1.32	0.03488	0.99997
GO:0010557	positive regulation of macromolecule bio...	447	61	49.17	0.03843	0.99997
GO:0008654	phospholipid biosynthetic process	70	13	7.7	0.03925	0.99997
GO:0000460	maturation of 5.8S rRNA	18	5	1.98	0.04019	0.99997
GO:0045576	mast cell activation	18	5	1.98	0.04019	0.99997
GO:0048538	thymus development	18	5	1.98	0.04019	0.99997
GO:0140029	exocytic process	24	6	2.64	0.04124	0.99997
GO:0006611	protein export from nucleus	50	10	5.5	0.04255	0.99997
GO:0071219	cellular response to molecule of bacteri...	50	10	5.5	0.04255	0.99997
GO:0008033	tRNA processing	57	11	6.27	0.04338	0.99997
GO:0045893	positive regulation of transcription, DN...	368	51	40.48	0.04395	0.99997
GO:1903508	positive regulation of nucleic acid-temp...	368	51	40.48	0.04395	0.99997
GO:0051254	positive regulation of RNA metabolic pro...	401	55	44.11	0.04422	0.99997
GO:1902680	positive regulation of RNA biosynthetic ...	369	51	40.59	0.04584	0.99997
GO:0000470	maturation of LSU-rRNA	13	4	1.43	0.04612	0.99997
GO:0007080	mitotic metaphase plate congression	13	4	1.43	0.04612	0.99997
GO:0030520	intracellular estrogen receptor signalin...	13	4	1.43	0.04612	0.99997
GO:0032210	regulation of telomere maintenance via t...	13	4	1.43	0.04612	0.99997
GO:0050691	regulation of defense response to virus ...	13	4	1.43	0.04612	0.99997
GO:0060147	regulation of posttranscriptional gene s...	13	4	1.43	0.04612	0.99997
GO:1905523	positive regulation of macrophage migrat...	13	4	1.43	0.04612	0.99997
GO:2000059	negative regulation of ubiquitin-depende...	13	4	1.43	0.04612	0.99997
GO:0140352	export from cell	248	36	27.28	0.04699	0.99997
GO:0006413	translational initiation	31	7	3.41	0.04722	0.99997
GO:0010389	regulation of G2/M transition of mitotic...	31	7	3.41	0.04722	0.99997
GO:0034620	cellular response to unfolded protein	31	7	3.41	0.04722	0.99997
GO:0002460	adaptive immune response based on somati...	72	13	7.92	0.04792	0.99997
GO:0046474	glycerophospholipid biosynthetic process	51	10	5.61	0.04795	0.99997
GO:0051168	nuclear export	51	10	5.61	0.04795	0.99997
GO:0014068	positive regulation of phosphatidylinosi...	25	6	2.75	0.04941	0.99997
GO:0006661	phosphatidylinositol biosynthetic proces...	19	5	2.09	0.04979	0.99997
GO:0006692	prostanoid metabolic process	19	5	2.09	0.04979	0.99997
GO:0006693	prostaglandin metabolic process	19	5	2.09	0.04979	0.99997
GO:0051051	negative regulation of transport	147	23	16.17	0.04991	0.99997
GO:0008630	intrinsic apoptotic signaling pathway in...	38	8	4.18	0.05085	0.99997
GO:0090407	organophosphate biosynthetic process	171	26	18.81	0.05240	0.99997
GO:0002221	pattern recognition receptor signaling p...	45	9	4.95	0.05288	0.99997
GO:0002429	immune response-activating cell surface ...	52	10	5.72	0.05380	0.99997
GO:0002757	immune response-activating signal transd...	52	10	5.72	0.05380	0.99997
GO:0071216	cellular response to biotic stimulus	52	10	5.72	0.05380	0.99997
GO:1902749	regulation of cell cycle G2/M phase tran...	32	7	3.52	0.05495	0.99997
GO:1904589	regulation of protein import	32	7	3.52	0.05495	0.99997
GO:0010629	negative regulation of gene expression	268	38	29.48	0.05689	0.99997
GO:0006959	humoral immune response	39	8	4.29	0.05809	0.99997
GO:0007098	centrosome cycle	39	8	4.29	0.05809	0.99997
GO:0002224	toll-like receptor signaling pathway	26	6	2.86	0.05852	0.99997
GO:0050766	positive regulation of phagocytosis	26	6	2.86	0.05852	0.99997
GO:0031330	negative regulation of cellular cataboli...	67	12	7.37	0.05900	0.99997
GO:0000027	ribosomal large subunit assembly	14	4	1.54	0.05914	0.99997
GO:0000154	rRNA modification	14	4	1.54	0.05914	0.99997
GO:0002886	regulation of myeloid leukocyte mediated...	14	4	1.54	0.05914	0.99997
GO:0006278	RNA-dependent DNA biosynthetic process	14	4	1.54	0.05914	0.99997
GO:0006378	mRNA polyadenylation	14	4	1.54	0.05914	0.99997
GO:0007004	telomere maintenance via telomerase	14	4	1.54	0.05914	0.99997
GO:0043627	response to estrogen	14	4	1.54	0.05914	0.99997
GO:0043631	RNA polyadenylation	14	4	1.54	0.05914	0.99997
GO:0050974	detection of mechanical stimulus involve...	14	4	1.54	0.05914	0.99997
GO:0060966	regulation of gene silencing by RNA	14	4	1.54	0.05914	0.99997
GO:0001824	blastocyst development	46	9	5.06	0.05963	0.99997
GO:0006887	exocytosis	104	17	11.44	0.05998	0.99997
GO:0006913	nucleocytoplasmic transport	104	17	11.44	0.05998	0.99997
GO:0051169	nuclear transport	104	17	11.44	0.05998	0.99997
GO:0006473	protein acetylation	53	10	5.83	0.06009	0.99997
GO:0019722	calcium-mediated signaling	53	10	5.83	0.06009	0.99997
GO:0001825	blastocyst formation	20	5	2.2	0.06061	0.99997
GO:0030968	endoplasmic reticulum unfolded protein r...	20	5	2.2	0.06061	0.99997
GO:0033143	regulation of intracellular steroid horm...	20	5	2.2	0.06061	0.99997
GO:0035914	skeletal muscle cell differentiation	20	5	2.2	0.06061	0.99997
GO:0035967	cellular response to topologically incor...	33	7	3.63	0.06343	0.99997
GO:0043467	regulation of generation of precursor me...	40	8	4.4	0.06595	0.99997
GO:0090305	nucleic acid phosphodiester bond hydroly...	40	8	4.4	0.06595	0.99997
GO:0071222	cellular response to lipopolysaccharide	47	9	5.17	0.06692	0.99997
GO:0032386	regulation of intracellular transport	121	19	13.31	0.06822	0.99997
GO:0032602	chemokine production	27	6	2.97	0.06855	0.99997
GO:0033559	unsaturated fatty acid metabolic process	27	6	2.97	0.06855	0.99997
GO:0002684	positive regulation of immune system pro...	224	32	24.64	0.07018	0.99997
GO:0002252	immune effector process	192	28	21.12	0.07030	0.99997
GO:0034248	regulation of cellular amide metabolic p...	137	21	15.07	0.07074	0.99997
GO:0031641	regulation of myelination	21	5	2.31	0.07266	0.99997
GO:0061912	selective autophagy	21	5	2.31	0.07266	0.99997
GO:0017148	negative regulation of translation	34	7	3.74	0.07267	0.99997
GO:0042177	negative regulation of protein catabolic...	34	7	3.74	0.07267	0.99997
GO:0001961	positive regulation of cytokine-mediated...	15	4	1.65	0.07389	0.99997
GO:0045471	response to ethanol	15	4	1.65	0.07389	0.99997
GO:0048821	erythrocyte development	15	4	1.65	0.07389	0.99997
GO:0050853	B cell receptor signaling pathway	15	4	1.65	0.07389	0.99997
GO:1903051	negative regulation of proteolysis invol...	15	4	1.65	0.07389	0.99997
GO:0043484	regulation of RNA splicing	55	10	6.05	0.07407	0.99997
GO:0031023	microtubule organizing center organizati...	41	8	4.51	0.07444	0.99997
GO:0023061	signal release	131	20	14.41	0.07902	0.99997
GO:0034504	protein localization to nucleus	93	15	10.23	0.08139	0.99997
GO:1903792	negative regulation of anion transport	78	13	8.58	0.08162	0.99997
GO:0120034	positive regulation of plasma membrane b...	35	7	3.85	0.08265	0.99997
GO:0006606	protein import into nucleus	49	9	5.39	0.08310	0.99997
GO:0051170	import into nucleus	49	9	5.39	0.08310	0.99997
GO:0009755	hormone-mediated signaling pathway	42	8	4.62	0.08356	0.99997
GO:0034341	response to interferon-gamma	42	8	4.62	0.08356	0.99997
GO:0009891	positive regulation of biosynthetic proc...	494	64	54.34	0.08364	0.99997
GO:1903829	positive regulation of cellular protein ...	101	16	11.11	0.08370	0.99997
GO:0006140	regulation of nucleotide metabolic proce...	22	5	2.42	0.08592	0.99997
GO:0006749	glutathione metabolic process	22	5	2.42	0.08592	0.99997
GO:0031397	negative regulation of protein ubiquitin...	22	5	2.42	0.08592	0.99997
GO:0140115	export across plasma membrane	22	5	2.42	0.08592	0.99997
GO:1900542	regulation of purine nucleotide metaboli...	22	5	2.42	0.08592	0.99997
GO:0006402	mRNA catabolic process	64	11	7.04	0.08740	0.99997
GO:0002448	mast cell mediated immunity	10	3	1.1	0.08823	0.99997
GO:0006085	acetyl-CoA biosynthetic process	10	3	1.1	0.08823	0.99997
GO:0006383	transcription by RNA polymerase III	10	3	1.1	0.08823	0.99997
GO:0010829	negative regulation of glucose transmemb...	10	3	1.1	0.08823	0.99997
GO:0010971	positive regulation of G2/M transition o...	10	3	1.1	0.08823	0.99997
GO:0035458	cellular response to interferon-beta	10	3	1.1	0.08823	0.99997
GO:0043300	regulation of leukocyte degranulation	10	3	1.1	0.08823	0.99997
GO:0043303	mast cell degranulation	10	3	1.1	0.08823	0.99997
GO:0048536	spleen development	10	3	1.1	0.08823	0.99997
GO:0050850	positive regulation of calcium-mediated ...	10	3	1.1	0.08823	0.99997
GO:0051220	cytoplasmic sequestering of protein	10	3	1.1	0.08823	0.99997
GO:0051491	positive regulation of filopodium assemb...	10	3	1.1	0.08823	0.99997
GO:0060148	positive regulation of posttranscription...	10	3	1.1	0.08823	0.99997
GO:1902751	positive regulation of cell cycle G2/M p...	10	3	1.1	0.08823	0.99997
GO:0032940	secretion by cell	229	32	25.19	0.08876	0.99997
GO:0001895	retina homeostasis	16	4	1.76	0.09031	0.99997
GO:0003407	neural retina development	16	4	1.76	0.09031	0.99997
GO:0030317	flagellated sperm motility	16	4	1.76	0.09031	0.99997
GO:0060968	regulation of gene silencing	16	4	1.76	0.09031	0.99997
GO:0090317	negative regulation of intracellular pro...	16	4	1.76	0.09031	0.99997
GO:0097722	sperm motility	16	4	1.76	0.09031	0.99997
GO:1901985	positive regulation of protein acetylati...	16	4	1.76	0.09031	0.99997
GO:1904356	regulation of telomere maintenance via t...	16	4	1.76	0.09031	0.99997
GO:0038034	signal transduction in absence of ligand	29	6	3.19	0.09142	0.99997
GO:0097192	extrinsic apoptotic signaling pathway in...	29	6	3.19	0.09142	0.99997
GO:1903312	negative regulation of mRNA metabolic pr...	29	6	3.19	0.09142	0.99997
GO:0050729	positive regulation of inflammatory resp...	36	7	3.96	0.09339	0.99997
GO:0050764	regulation of phagocytosis	36	7	3.96	0.09339	0.99997
GO:0097305	response to alcohol	36	7	3.96	0.09339	0.99997
GO:0045935	positive regulation of nucleobase-contai...	448	58	49.28	0.09748	0.99997
GO:0016236	macroautophagy	58	10	6.38	0.09857	0.99997
GO:0034097	response to cytokine	248	34	27.28	0.09961	0.99997
GO:0045454	cell redox homeostasis	23	5	2.53	0.10035	0.99997
GO:0051224	negative regulation of protein transport	51	9	5.61	0.10144	0.99997
GO:1904950	negative regulation of establishment of ...	51	9	5.61	0.10144	0.99997
GO:0046879	hormone secretion	81	13	8.91	0.10302	0.99997
GO:1903900	regulation of viral life cycle	44	8	4.84	0.10368	0.99997
GO:0046928	regulation of neurotransmitter secretion	30	6	3.3	0.10422	0.99997
GO:1903578	regulation of ATP metabolic process	30	6	3.3	0.10422	0.99997
GO:0002764	immune response-regulating signaling pat...	59	10	6.49	0.10768	0.99997
GO:0002768	immune response-regulating cell surface ...	59	10	6.49	0.10768	0.99997
GO:0006401	RNA catabolic process	74	12	8.14	0.10772	0.99997
GO:0010833	telomere maintenance via telomere length...	17	4	1.87	0.10831	0.99997
GO:0031124	mRNA 3'-end processing	17	4	1.87	0.10831	0.99997
GO:0050982	detection of mechanical stimulus	17	4	1.87	0.10831	0.99997
GO:0051310	metaphase plate congression	17	4	1.87	0.10831	0.99997
GO:0009914	hormone transport	82	13	9.02	0.11084	0.99997
GO:0051048	negative regulation of secretion	52	9	5.72	0.11141	0.99997
GO:0006974	cellular response to DNA damage stimulus	226	31	24.86	0.11145	0.99997
GO:1903530	regulation of secretion by cell	169	24	18.59	0.11169	0.99997
GO:0000469	cleavage involved in rRNA processing	11	3	1.21	0.11179	0.99997
GO:0002673	regulation of acute inflammatory respons...	11	3	1.21	0.11179	0.99997
GO:0008089	anterograde axonal transport	11	3	1.21	0.11179	0.99997
GO:0031167	rRNA methylation	11	3	1.21	0.11179	0.99997
GO:0033198	response to ATP	11	3	1.21	0.11179	0.99997
GO:0034123	positive regulation of toll-like recepto...	11	3	1.21	0.11179	0.99997
GO:0034661	ncRNA catabolic process	11	3	1.21	0.11179	0.99997
GO:0042407	cristae formation	11	3	1.21	0.11179	0.99997
GO:0042531	positive regulation of tyrosine phosphor...	11	3	1.21	0.11179	0.99997
GO:0045806	negative regulation of endocytosis	11	3	1.21	0.11179	0.99997
GO:0046329	negative regulation of JNK cascade	11	3	1.21	0.11179	0.99997
GO:0048854	brain morphogenesis	11	3	1.21	0.11179	0.99997
GO:0051180	vitamin transport	11	3	1.21	0.11179	0.99997
GO:2000279	negative regulation of DNA biosynthetic ...	11	3	1.21	0.11179	0.99997
GO:0030522	intracellular receptor signaling pathway	67	11	7.37	0.11248	0.99997
GO:0140056	organelle localization by membrane tethe...	24	5	2.64	0.11591	0.99997
GO:1903321	negative regulation of protein modificat...	24	5	2.64	0.11591	0.99997
GO:0017038	protein import	75	12	8.25	0.11618	0.99997
GO:0000086	G2/M transition of mitotic cell cycle	38	7	4.18	0.11705	0.99997
GO:0006986	response to unfolded protein	38	7	4.18	0.11705	0.99997
GO:0014066	regulation of phosphatidylinositol 3-kin...	38	7	4.18	0.11705	0.99997
GO:0002367	cytokine production involved in immune r...	31	6	3.41	0.11790	0.99997
GO:0061515	myeloid cell development	31	6	3.41	0.11790	0.99997
GO:0071346	cellular response to interferon-gamma	31	6	3.41	0.11790	0.99997
GO:0031328	positive regulation of cellular biosynth...	480	61	52.8	0.11875	0.99997
GO:0046883	regulation of hormone secretion	68	11	7.48	0.12168	0.99997
GO:0001659	temperature homeostasis	53	9	5.83	0.12190	0.99997
GO:0002703	regulation of leukocyte mediated immunit...	53	9	5.83	0.12190	0.99997
GO:0034249	negative regulation of cellular amide me...	46	8	5.06	0.12625	0.99997
GO:1903305	regulation of regulated secretory pathwa...	46	8	5.06	0.12625	0.99997
GO:0042493	response to drug	61	10	6.71	0.12728	0.99997
GO:0097193	intrinsic apoptotic signaling pathway	84	13	9.24	0.12750	0.99997
GO:0000381	regulation of alternative mRNA splicing,...	18	4	1.98	0.12777	0.99997
GO:0030330	DNA damage response, signal transduction...	18	4	1.98	0.12777	0.99997
GO:0032204	regulation of telomere maintenance	18	4	1.98	0.12777	0.99997
GO:0032418	lysosome localization	18	4	1.98	0.12777	0.99997
GO:0042743	hydrogen peroxide metabolic process	18	4	1.98	0.12777	0.99997
GO:0048278	vesicle docking	18	4	1.98	0.12777	0.99997
GO:0050000	chromosome localization	18	4	1.98	0.12777	0.99997
GO:0051303	establishment of chromosome localization	18	4	1.98	0.12777	0.99997
GO:0048024	regulation of mRNA splicing, via spliceo...	39	7	4.29	0.12995	0.99997
GO:0071621	granulocyte chemotaxis	39	7	4.29	0.12995	0.99997
GO:0001666	response to hypoxia	69	11	7.59	0.13128	0.99997
GO:0001510	RNA methylation	25	5	2.75	0.13253	0.99997
GO:0022406	membrane docking	25	5	2.75	0.13253	0.99997
GO:0034394	protein localization to cell surface	25	5	2.75	0.13253	0.99997
GO:0050906	detection of stimulus involved in sensor...	25	5	2.75	0.13253	0.99997
GO:0007519	skeletal muscle tissue development	54	9	5.94	0.13291	0.99997
GO:0043903	regulation of biological process involve...	54	9	5.94	0.13291	0.99997
GO:1903311	regulation of mRNA metabolic process	85	13	9.35	0.13634	0.99997
GO:0046903	secretion	256	34	28.16	0.13696	0.99997
GO:0003016	respiratory system process	12	3	1.32	0.13743	0.99997
GO:0010758	regulation of macrophage chemotaxis	12	3	1.32	0.13743	0.99997
GO:0032481	positive regulation of type I interferon...	12	3	1.32	0.13743	0.99997
GO:0032608	interferon-beta production	12	3	1.32	0.13743	0.99997
GO:0032648	regulation of interferon-beta production	12	3	1.32	0.13743	0.99997
GO:0035384	thioester biosynthetic process	12	3	1.32	0.13743	0.99997
GO:0042088	T-helper 1 type immune response	12	3	1.32	0.13743	0.99997
GO:0045494	photoreceptor cell maintenance	12	3	1.32	0.13743	0.99997
GO:0048247	lymphocyte chemotaxis	12	3	1.32	0.13743	0.99997
GO:0050798	activated T cell proliferation	12	3	1.32	0.13743	0.99997
GO:0051568	histone H3-K4 methylation	12	3	1.32	0.13743	0.99997
GO:0060412	ventricular septum morphogenesis	12	3	1.32	0.13743	0.99997
GO:0060999	positive regulation of dendritic spine d...	12	3	1.32	0.13743	0.99997
GO:0061082	myeloid leukocyte cytokine production	12	3	1.32	0.13743	0.99997
GO:0071616	acyl-CoA biosynthetic process	12	3	1.32	0.13743	0.99997
GO:0098930	axonal transport	12	3	1.32	0.13743	0.99997
GO:1902742	apoptotic process involved in developmen...	12	3	1.32	0.13743	0.99997
GO:0045017	glycerolipid biosynthetic process	62	10	6.82	0.13777	0.99997
GO:0034612	response to tumor necrosis factor	47	8	5.17	0.13842	0.99997
GO:0034655	nucleobase-containing compound catabolic...	109	16	11.99	0.13929	0.99997
GO:0051046	regulation of secretion	182	25	20.02	0.14013	0.99997
GO:0002573	myeloid leukocyte differentiation	70	11	7.7	0.14128	0.99997
GO:0043543	protein acylation	70	11	7.7	0.14128	0.99997
GO:0035966	response to topologically incorrect prot...	40	7	4.4	0.14353	0.99997
GO:0044839	cell cycle G2/M phase transition	40	7	4.4	0.14353	0.99997
GO:0070482	response to oxygen levels	78	12	8.58	0.14378	0.99997
GO:0007517	muscle organ development	94	14	10.34	0.14660	0.99997
GO:0030593	neutrophil chemotaxis	33	6	3.63	0.14776	0.99997
GO:0003151	outflow tract morphogenesis	19	4	2.09	0.14857	0.99997
GO:0048524	positive regulation of viral process	19	4	2.09	0.14857	0.99997
GO:0050848	regulation of calcium-mediated signaling	19	4	2.09	0.14857	0.99997
GO:0060294	cilium movement involved in cell motilit...	19	4	2.09	0.14857	0.99997
GO:1903363	negative regulation of cellular protein ...	19	4	2.09	0.14857	0.99997
GO:0001676	long-chain fatty acid metabolic process	26	5	2.86	0.15015	0.99997
GO:0032642	regulation of chemokine production	26	5	2.86	0.15015	0.99997
GO:0042147	retrograde transport, endosome to Golgi	26	5	2.86	0.15015	0.99997
GO:0062207	regulation of pattern recognition recept...	26	5	2.86	0.15015	0.99997
GO:0002521	leukocyte differentiation	159	22	17.49	0.15059	0.99997
GO:0036293	response to decreased oxygen levels	71	11	7.81	0.15168	0.99997
GO:0032880	regulation of protein localization	293	38	32.23	0.15459	0.99997
GO:0002687	positive regulation of leukocyte migrati...	56	9	6.16	0.15643	0.99997
GO:0050954	sensory perception of mechanical stimulu...	56	9	6.16	0.15643	0.99997
GO:0060538	skeletal muscle organ development	56	9	6.16	0.15643	0.99997
GO:0061013	regulation of mRNA catabolic process	41	7	4.51	0.15775	0.99997
GO:0071356	cellular response to tumor necrosis fact...	41	7	4.51	0.15775	0.99997
GO:0002449	lymphocyte mediated immunity	64	10	7.04	0.16004	0.99997
GO:0017157	regulation of exocytosis	64	10	7.04	0.16004	0.99997
GO:0080134	regulation of response to stress	354	45	38.94	0.16250	0.99997
GO:0003279	cardiac septum development	34	6	3.74	0.16386	0.99997
GO:0050792	regulation of viral process	49	8	5.39	0.16443	0.99997
GO:0050796	regulation of insulin secretion	49	8	5.39	0.16443	0.99997
GO:0097530	granulocyte migration	49	8	5.39	0.16443	0.99997
GO:1902107	positive regulation of leukocyte differe...	49	8	5.39	0.16443	0.99997
GO:1903708	positive regulation of hemopoiesis	49	8	5.39	0.16443	0.99997
GO:0001774	microglial cell activation	13	3	1.43	0.16482	0.99997
GO:0006904	vesicle docking involved in exocytosis	13	3	1.43	0.16482	0.99997
GO:0007215	glutamate receptor signaling pathway	13	3	1.43	0.16482	0.99997
GO:0042744	hydrogen peroxide catabolic process	13	3	1.43	0.16482	0.99997
GO:0071709	membrane assembly	13	3	1.43	0.16482	0.99997
GO:0090313	regulation of protein targeting to membr...	13	3	1.43	0.16482	0.99997
GO:0090502	RNA phosphodiester bond hydrolysis, endo...	13	3	1.43	0.16482	0.99997
GO:0000956	nuclear-transcribed mRNA catabolic proce...	27	5	2.97	0.16870	0.99997
GO:0002718	regulation of cytokine production involv...	27	5	2.97	0.16870	0.99997
GO:0006835	dicarboxylic acid transport	27	5	2.97	0.16870	0.99997
GO:0045069	regulation of viral genome replication	27	5	2.97	0.16870	0.99997
GO:0050821	protein stabilization	57	9	6.27	0.16889	0.99997
GO:0090276	regulation of peptide hormone secretion	57	9	6.27	0.16889	0.99997
GO:0000380	alternative mRNA splicing, via spliceoso...	20	4	2.2	0.17056	0.99997
GO:0001539	cilium or flagellum-dependent cell motil...	20	4	2.2	0.17056	0.99997
GO:0002763	positive regulation of myeloid leukocyte...	20	4	2.2	0.17056	0.99997
GO:0009247	glycolipid biosynthetic process	20	4	2.2	0.17056	0.99997
GO:0016441	posttranscriptional gene silencing	20	4	2.2	0.17056	0.99997
GO:0032456	endocytic recycling	20	4	2.2	0.17056	0.99997
GO:0035194	post-transcriptional gene silencing by R...	20	4	2.2	0.17056	0.99997
GO:0035195	gene silencing by miRNA	20	4	2.2	0.17056	0.99997
GO:0060285	cilium-dependent cell motility	20	4	2.2	0.17056	0.99997
GO:1902373	negative regulation of mRNA catabolic pr...	20	4	2.2	0.17056	0.99997
GO:1905521	regulation of macrophage migration	20	4	2.2	0.17056	0.99997
GO:2000300	regulation of synaptic vesicle exocytosi...	20	4	2.2	0.17056	0.99997
GO:0060548	negative regulation of cell death	313	40	34.43	0.17071	0.99997
GO:0007269	neurotransmitter secretion	42	7	4.62	0.17259	0.99997
GO:0099643	signal release from synapse	42	7	4.62	0.17259	0.99997
GO:1990266	neutrophil migration	42	7	4.62	0.17259	0.99997
GO:0050708	regulation of protein secretion	81	12	8.91	0.17456	0.99997
GO:0032269	negative regulation of cellular protein ...	246	32	27.06	0.17519	0.99997
GO:0043207	response to external biotic stimulus	314	40	34.54	0.17614	0.99997
GO:0051707	response to other organism	314	40	34.54	0.17614	0.99997
GO:0043270	positive regulation of ion transport	213	28	23.43	0.17938	0.99997
GO:0044272	sulfur compound biosynthetic process	35	6	3.85	0.18066	0.99997
GO:0009743	response to carbohydrate	58	9	6.38	0.18181	0.99997
GO:0044270	cellular nitrogen compound catabolic pro...	114	16	12.54	0.18253	0.99997
GO:0046700	heterocycle catabolic process	114	16	12.54	0.18253	0.99997
GO:1903827	regulation of cellular protein localizat...	189	25	20.79	0.18734	0.99997
GO:0002181	cytoplasmic translation	28	5	3.08	0.18808	0.99997
GO:0009408	response to heat	28	5	3.08	0.18808	0.99997
GO:0042255	ribosome assembly	28	5	3.08	0.18808	0.99997
GO:0043525	positive regulation of neuron apoptotic ...	28	5	3.08	0.18808	0.99997
GO:1903035	negative regulation of response to wound...	28	5	3.08	0.18808	0.99997
GO:0016071	mRNA metabolic process	206	27	22.66	0.18895	0.99997
GO:0032680	regulation of tumor necrosis factor prod...	51	8	5.61	0.19252	0.99997
GO:0050684	regulation of mRNA processing	51	8	5.61	0.19252	0.99997
GO:0031060	regulation of histone methylation	21	4	2.31	0.19359	0.99997
GO:0046323	glucose import	21	4	2.31	0.19359	0.99997
GO:0050688	regulation of defense response to virus	21	4	2.31	0.19359	0.99997
GO:0061045	negative regulation of wound healing	21	4	2.31	0.19359	0.99997
GO:0071622	regulation of granulocyte chemotaxis	21	4	2.31	0.19359	0.99997
GO:0001913	T cell mediated cytotoxicity	14	3	1.54	0.19364	0.99997
GO:0002293	alpha-beta T cell differentiation involv...	14	3	1.54	0.19364	0.99997
GO:0002294	CD4-positive, alpha-beta T cell differen...	14	3	1.54	0.19364	0.99997
GO:0007260	tyrosine phosphorylation of STAT protein	14	3	1.54	0.19364	0.99997
GO:0015872	dopamine transport	14	3	1.54	0.19364	0.99997
GO:0030511	positive regulation of transforming grow...	14	3	1.54	0.19364	0.99997
GO:0032731	positive regulation of interleukin-1 bet...	14	3	1.54	0.19364	0.99997
GO:0032873	negative regulation of stress-activated ...	14	3	1.54	0.19364	0.99997
GO:0033866	nucleoside bisphosphate biosynthetic pro...	14	3	1.54	0.19364	0.99997
GO:0034030	ribonucleoside bisphosphate biosynthetic...	14	3	1.54	0.19364	0.99997
GO:0034033	purine nucleoside bisphosphate biosynthe...	14	3	1.54	0.19364	0.99997
GO:0042093	T-helper cell differentiation	14	3	1.54	0.19364	0.99997
GO:0042509	regulation of tyrosine phosphorylation o...	14	3	1.54	0.19364	0.99997
GO:0044091	membrane biogenesis	14	3	1.54	0.19364	0.99997
GO:0051489	regulation of filopodium assembly	14	3	1.54	0.19364	0.99997
GO:0070303	negative regulation of stress-activated ...	14	3	1.54	0.19364	0.99997
GO:0071158	positive regulation of cell cycle arrest	14	3	1.54	0.19364	0.99997
GO:1903846	positive regulation of cellular response...	14	3	1.54	0.19364	0.99997
GO:0048534	hematopoietic or lymphoid organ developm...	283	36	31.13	0.19400	0.99997
GO:0009306	protein secretion	99	14	10.89	0.19490	0.99997
GO:0035592	establishment of protein localization to...	99	14	10.89	0.19490	0.99997
GO:0043069	negative regulation of programmed cell d...	275	35	30.25	0.19723	0.99997
GO:0035107	appendage morphogenesis	36	6	3.96	0.19811	0.99997
GO:0035108	limb morphogenesis	36	6	3.96	0.19811	0.99997
GO:0060759	regulation of response to cytokine stimu...	36	6	3.96	0.19811	0.99997
GO:0043066	negative regulation of apoptotic process	267	34	29.37	0.20053	0.99997
GO:0048736	appendage development	44	7	4.84	0.20396	0.99997
GO:0060173	limb development	44	7	4.84	0.20396	0.99997
GO:0009607	response to biotic stimulus	319	40	35.09	0.20466	0.99997
GO:0031347	regulation of defense response	158	21	17.38	0.20649	0.99997
GO:1901987	regulation of cell cycle phase transitio...	92	13	10.12	0.20697	0.99997
GO:0071322	cellular response to carbohydrate stimul...	52	8	5.72	0.20726	0.99997
GO:1903555	regulation of tumor necrosis factor supe...	52	8	5.72	0.20726	0.99997
GO:0016064	immunoglobulin mediated immune response	29	5	3.19	0.20822	0.99997
GO:0016241	regulation of macroautophagy	29	5	3.19	0.20822	0.99997
GO:0030518	intracellular steroid hormone receptor s...	29	5	3.19	0.20822	0.99997
GO:0032649	regulation of interferon-gamma productio...	29	5	3.19	0.20822	0.99997
GO:0042770	signal transduction in response to DNA d...	29	5	3.19	0.20822	0.99997
GO:0060341	regulation of cellular localization	294	37	32.34	0.20913	0.99997
GO:0045055	regulated exocytosis	68	10	7.48	0.20941	0.99997
GO:0019439	aromatic compound catabolic process	117	16	12.87	0.21134	0.99997
GO:0006955	immune response	346	43	38.06	0.21164	0.99997
GO:0051248	negative regulation of protein metabolic...	269	34	29.59	0.21353	0.99997
GO:0043269	regulation of ion transport	407	50	44.77	0.21425	0.99997
GO:0071396	cellular response to lipid	134	18	14.74	0.21547	0.99997
GO:0051588	regulation of neurotransmitter transport	37	6	4.07	0.21616	0.99997
GO:0098876	vesicle-mediated transport to the plasma...	37	6	4.07	0.21616	0.99997
GO:0016575	histone deacetylation	22	4	2.42	0.21751	0.99997
GO:0032387	negative regulation of intracellular tra...	22	4	2.42	0.21751	0.99997
GO:0062014	negative regulation of small molecule me...	22	4	2.42	0.21751	0.99997
GO:1903533	regulation of protein targeting	22	4	2.42	0.21751	0.99997
GO:0030097	hemopoiesis	270	34	29.7	0.22018	0.99997
GO:0006457	protein folding	45	7	4.95	0.22041	0.99997
GO:1903531	negative regulation of secretion by cell	45	7	4.95	0.22041	0.99997
GO:0016197	endosomal transport	77	11	8.47	0.22160	0.99997
GO:0030073	insulin secretion	53	8	5.83	0.22244	0.99997
GO:0032640	tumor necrosis factor production	53	8	5.83	0.22244	0.99997
GO:0002287	alpha-beta T cell activation involved in...	15	3	1.65	0.22358	0.99997
GO:0002292	T cell differentiation involved in immun...	15	3	1.65	0.22358	0.99997
GO:0002437	inflammatory response to antigenic stimu...	15	3	1.65	0.22358	0.99997
GO:0003351	epithelial cilium movement involved in e...	15	3	1.65	0.22358	0.99997
GO:0009311	oligosaccharide metabolic process	15	3	1.65	0.22358	0.99997
GO:0031057	negative regulation of histone modificat...	15	3	1.65	0.22358	0.99997
GO:0032720	negative regulation of tumor necrosis fa...	15	3	1.65	0.22358	0.99997
GO:0032757	positive regulation of interleukin-8 pro...	15	3	1.65	0.22358	0.99997
GO:0035690	cellular response to drug	15	3	1.65	0.22358	0.99997
GO:0050432	catecholamine secretion	15	3	1.65	0.22358	0.99997
GO:0050433	regulation of catecholamine secretion	15	3	1.65	0.22358	0.99997
GO:0097242	amyloid-beta clearance	15	3	1.65	0.22358	0.99997
GO:1902001	fatty acid transmembrane transport	15	3	1.65	0.22358	0.99997
GO:1903556	negative regulation of tumor necrosis fa...	15	3	1.65	0.22358	0.99997
GO:1903960	negative regulation of anion transmembra...	15	3	1.65	0.22358	0.99997
GO:1904707	positive regulation of vascular associat...	15	3	1.65	0.22358	0.99997
GO:1990573	potassium ion import across plasma membr...	15	3	1.65	0.22358	0.99997
GO:0071692	protein localization to extracellular re...	102	14	11.22	0.22704	0.99997
GO:0006497	protein lipidation	30	5	3.3	0.22902	0.99997
GO:0016079	synaptic vesicle exocytosis	30	5	3.3	0.22902	0.99997
GO:0019724	B cell mediated immunity	30	5	3.3	0.22902	0.99997
GO:0032609	interferon-gamma production	30	5	3.3	0.22902	0.99997
GO:0035601	protein deacylation	30	5	3.3	0.22902	0.99997
GO:0043401	steroid hormone mediated signaling pathw...	30	5	3.3	0.22902	0.99997
GO:0051262	protein tetramerization	30	5	3.3	0.22902	0.99997
GO:0098732	macromolecule deacylation	30	5	3.3	0.22902	0.99997
GO:0006790	sulfur compound metabolic process	94	13	10.34	0.22970	0.99997
GO:0006644	phospholipid metabolic process	119	16	13.09	0.23162	0.99997
GO:1901990	regulation of mitotic cell cycle phase t...	86	12	9.46	0.23217	0.99997
GO:0003206	cardiac chamber morphogenesis	38	6	4.18	0.23474	0.99997
GO:0009799	specification of symmetry	38	6	4.18	0.23474	0.99997
GO:0009855	determination of bilateral symmetry	38	6	4.18	0.23474	0.99997
GO:0043488	regulation of mRNA stability	38	6	4.18	0.23474	0.99997
GO:0046488	phosphatidylinositol metabolic process	38	6	4.18	0.23474	0.99997
GO:0043271	negative regulation of ion transport	111	15	12.21	0.23495	0.99997
GO:0000819	sister chromatid segregation	46	7	5.06	0.23732	0.99997
GO:0015718	monocarboxylic acid transport	46	7	5.06	0.23732	0.99997
GO:0050851	antigen receptor-mediated signaling path...	46	7	5.06	0.23732	0.99997
GO:0022618	ribonucleoprotein complex assembly	62	9	6.82	0.23751	0.99997
GO:0071706	tumor necrosis factor superfamily cytoki...	54	8	5.94	0.23801	0.99997
GO:0000041	transition metal ion transport	23	4	2.53	0.24218	0.99997
GO:0015800	acidic amino acid transport	23	4	2.53	0.24218	0.99997
GO:0045668	negative regulation of osteoblast differ...	23	4	2.53	0.24218	0.99997
GO:1905517	macrophage migration	23	4	2.53	0.24218	0.99997
GO:0002791	regulation of peptide secretion	87	12	9.57	0.24452	0.99997
GO:0043414	macromolecule methylation	87	12	9.57	0.24452	0.99997
GO:0044772	mitotic cell cycle phase transition	112	15	12.32	0.24584	0.99997
GO:0051050	positive regulation of transport	291	36	32.01	0.24588	0.99997
GO:0043523	regulation of neuron apoptotic process	79	11	8.69	0.24743	0.99997
GO:0000723	telomere maintenance	31	5	3.41	0.25039	0.99997
GO:0001776	leukocyte homeostasis	31	5	3.41	0.25039	0.99997
GO:0042158	lipoprotein biosynthetic process	31	5	3.41	0.25039	0.99997
GO:0002262	myeloid cell homeostasis	63	9	6.93	0.25231	0.99997
GO:0000070	mitotic sister chromatid segregation	39	6	4.29	0.25380	0.99997
GO:0042157	lipoprotein metabolic process	39	6	4.29	0.25380	0.99997
GO:0007254	JNK cascade	55	8	6.05	0.25394	0.99997
GO:0051260	protein homooligomerization	55	8	6.05	0.25394	0.99997
GO:0001941	postsynaptic membrane organization	16	3	1.76	0.25434	0.99997
GO:0006084	acetyl-CoA metabolic process	16	3	1.76	0.25434	0.99997
GO:0006858	extracellular transport	16	3	1.76	0.25434	0.99997
GO:0014741	negative regulation of muscle hypertroph...	16	3	1.76	0.25434	0.99997
GO:0032732	positive regulation of interleukin-1 pro...	16	3	1.76	0.25434	0.99997
GO:0043277	apoptotic cell clearance	16	3	1.76	0.25434	0.99997
GO:0043966	histone H3 acetylation	16	3	1.76	0.25434	0.99997
GO:0048246	macrophage chemotaxis	16	3	1.76	0.25434	0.99997
GO:0048634	regulation of muscle organ development	16	3	1.76	0.25434	0.99997
GO:0062208	positive regulation of pattern recogniti...	16	3	1.76	0.25434	0.99997
GO:1901861	regulation of muscle tissue development	16	3	1.76	0.25434	0.99997
GO:0106106	cold-induced thermogenesis	47	7	5.17	0.25462	0.99997
GO:0120161	regulation of cold-induced thermogenesis	47	7	5.17	0.25462	0.99997
GO:0001818	negative regulation of cytokine producti...	80	11	8.8	0.26074	0.99997
GO:0002237	response to molecule of bacterial origin	80	11	8.8	0.26074	0.99997
GO:0006399	tRNA metabolic process	80	11	8.8	0.26074	0.99997
GO:0002520	immune system development	302	37	33.22	0.26203	0.99997
GO:0044770	cell cycle phase transition	122	16	13.42	0.26349	0.99997
GO:0002682	regulation of immune system process	355	43	39.05	0.26719	0.99997
GO:0071826	ribonucleoprotein complex subunit organi...	64	9	7.04	0.26741	0.99997
GO:0002275	myeloid cell activation involved in immu...	24	4	2.64	0.26744	0.99997
GO:0035305	negative regulation of dephosphorylation	24	4	2.64	0.26744	0.99997
GO:0045123	cellular extravasation	24	4	2.64	0.26744	0.99997
GO:0045582	positive regulation of T cell differenti...	24	4	2.64	0.26744	0.99997
GO:0046632	alpha-beta T cell differentiation	24	4	2.64	0.26744	0.99997
GO:0097006	regulation of plasma lipoprotein particl...	24	4	2.64	0.26744	0.99997
GO:1902117	positive regulation of organelle assembl...	24	4	2.64	0.26744	0.99997
GO:1902369	negative regulation of RNA catabolic pro...	24	4	2.64	0.26744	0.99997
GO:0007272	ensheathment of neurons	56	8	6.16	0.27019	0.99997
GO:0008366	axon ensheathment	56	8	6.16	0.27019	0.99997
GO:0042552	myelination	56	8	6.16	0.27019	0.99997
GO:0002456	T cell mediated immunity	32	5	3.52	0.27223	0.99997
GO:0008645	hexose transmembrane transport	32	5	3.52	0.27223	0.99997
GO:0015749	monosaccharide transmembrane transport	32	5	3.52	0.27223	0.99997
GO:0032200	telomere organization	32	5	3.52	0.27223	0.99997
GO:0034219	carbohydrate transmembrane transport	32	5	3.52	0.27223	0.99997
GO:0071456	cellular response to hypoxia	32	5	3.52	0.27223	0.99997
GO:1904659	glucose transmembrane transport	32	5	3.52	0.27223	0.99997
GO:0019079	viral genome replication	40	6	4.4	0.27325	0.99997
GO:0051259	protein complex oligomerization	73	10	8.03	0.27859	0.99997
GO:0030072	peptide hormone secretion	65	9	7.15	0.28277	0.99997
GO:0032259	methylation	107	14	11.77	0.28499	0.99997
GO:0009617	response to bacterium	141	18	15.51	0.28524	0.99997
GO:0009261	ribonucleotide catabolic process	17	3	1.87	0.28563	0.99997
GO:0010923	negative regulation of phosphatase activ...	17	3	1.87	0.28563	0.99997
GO:0032722	positive regulation of chemokine product...	17	3	1.87	0.28563	0.99997
GO:0043537	negative regulation of blood vessel endo...	17	3	1.87	0.28563	0.99997
GO:0046148	pigment biosynthetic process	17	3	1.87	0.28563	0.99997
GO:0046324	regulation of glucose import	17	3	1.87	0.28563	0.99997
GO:0048286	lung alveolus development	17	3	1.87	0.28563	0.99997
GO:0070936	protein K48-linked ubiquitination	17	3	1.87	0.28563	0.99997
GO:0072089	stem cell proliferation	17	3	1.87	0.28563	0.99997
GO:1902624	positive regulation of neutrophil migrat...	17	3	1.87	0.28563	0.99997
GO:1903307	positive regulation of regulated secreto...	17	3	1.87	0.28563	0.99997
GO:1905268	negative regulation of chromatin organiz...	17	3	1.87	0.28563	0.99997
GO:2001239	regulation of extrinsic apoptotic signal...	17	3	1.87	0.28563	0.99997
GO:0006575	cellular modified amino acid metabolic p...	57	8	6.27	0.28673	0.99997
GO:0044843	cell cycle G1/S phase transition	57	8	6.27	0.28673	0.99997
GO:0048015	phosphatidylinositol-mediated signaling	57	8	6.27	0.28673	0.99997
GO:0048017	inositol lipid-mediated signaling	57	8	6.27	0.28673	0.99997
GO:0031647	regulation of protein stability	82	11	9.02	0.28804	0.99997
GO:0045861	negative regulation of proteolysis	82	11	9.02	0.28804	0.99997
GO:0044419	biological process involved in interspec...	376	45	41.36	0.29005	0.99997
GO:0014065	phosphatidylinositol 3-kinase signaling	49	7	5.39	0.29027	0.99997
GO:0050870	positive regulation of T cell activation	49	7	5.39	0.29027	0.99997
GO:1990845	adaptive thermogenesis	49	7	5.39	0.29027	0.99997
GO:0050727	regulation of inflammatory response	99	13	10.89	0.29049	0.99997
GO:0071345	cellular response to cytokine stimulus	219	27	24.09	0.29054	0.99997
GO:0002761	regulation of myeloid leukocyte differen...	41	6	4.51	0.29305	0.99997
GO:0043123	positive regulation of I-kappaB kinase/N...	41	6	4.51	0.29305	0.99997
GO:0043487	regulation of RNA stability	41	6	4.51	0.29305	0.99997
GO:1902806	regulation of cell cycle G1/S phase tran...	41	6	4.51	0.29305	0.99997
GO:1903828	negative regulation of cellular protein ...	41	6	4.51	0.29305	0.99997
GO:0002444	myeloid leukocyte mediated immunity	25	4	2.75	0.29313	0.99997
GO:0006664	glycolipid metabolic process	25	4	2.75	0.29313	0.99997
GO:0019730	antimicrobial humoral response	25	4	2.75	0.29313	0.99997
GO:0031047	gene silencing by RNA	25	4	2.75	0.29313	0.99997
GO:0035710	CD4-positive, alpha-beta T cell activati...	25	4	2.75	0.29313	0.99997
GO:0065002	intracellular protein transmembrane tran...	25	4	2.75	0.29313	0.99997
GO:0098659	inorganic cation import across plasma me...	25	4	2.75	0.29313	0.99997
GO:0099587	inorganic ion import across plasma membr...	25	4	2.75	0.29313	0.99997
GO:1901983	regulation of protein acetylation	25	4	2.75	0.29313	0.99997
GO:1903509	liposaccharide metabolic process	25	4	2.75	0.29313	0.99997
GO:0002690	positive regulation of leukocyte chemota...	33	5	3.63	0.29446	0.99997
GO:0002705	positive regulation of leukocyte mediate...	33	5	3.63	0.29446	0.99997
GO:0018022	peptidyl-lysine methylation	33	5	3.63	0.29446	0.99997
GO:0030183	B cell differentiation	33	5	3.63	0.29446	0.99997
GO:0032652	regulation of interleukin-1 production	33	5	3.63	0.29446	0.99997
GO:0032760	positive regulation of tumor necrosis fa...	33	5	3.63	0.29446	0.99997
GO:0036294	cellular response to decreased oxygen le...	33	5	3.63	0.29446	0.99997
GO:0046916	cellular transition metal ion homeostasi...	33	5	3.63	0.29446	0.99997
GO:0051341	regulation of oxidoreductase activity	33	5	3.63	0.29446	0.99997
GO:2001022	positive regulation of response to DNA d...	33	5	3.63	0.29446	0.99997
GO:1901361	organic cyclic compound catabolic proces...	125	16	13.75	0.29686	0.99997
GO:0006397	mRNA processing	151	19	16.61	0.30023	0.99997
GO:0046907	intracellular transport	457	54	50.27	0.30122	0.99997
GO:0019637	organophosphate metabolic process	290	35	31.9	0.30139	0.99997
GO:0000731	DNA synthesis involved in DNA repair	10	2	1.1	0.30279	0.99997
GO:0000963	mitochondrial RNA processing	10	2	1.1	0.30279	0.99997
GO:0002043	blood vessel endothelial cell proliferat...	10	2	1.1	0.30279	0.99997
GO:0002693	positive regulation of cellular extravas...	10	2	1.1	0.30279	0.99997
GO:0002701	negative regulation of production of mol...	10	2	1.1	0.30279	0.99997
GO:0006730	one-carbon metabolic process	10	2	1.1	0.30279	0.99997
GO:0006779	porphyrin-containing compound biosynthet...	10	2	1.1	0.30279	0.99997
GO:0007062	sister chromatid cohesion	10	2	1.1	0.30279	0.99997
GO:0010955	negative regulation of protein processin...	10	2	1.1	0.30279	0.99997
GO:0021602	cranial nerve morphogenesis	10	2	1.1	0.30279	0.99997
GO:0031062	positive regulation of histone methylati...	10	2	1.1	0.30279	0.99997
GO:0031365	N-terminal protein amino acid modificati...	10	2	1.1	0.30279	0.99997
GO:0032715	negative regulation of interleukin-6 pro...	10	2	1.1	0.30279	0.99997
GO:0032770	positive regulation of monooxygenase act...	10	2	1.1	0.30279	0.99997
GO:0032941	secretion by tissue	10	2	1.1	0.30279	0.99997
GO:0033014	tetrapyrrole biosynthetic process	10	2	1.1	0.30279	0.99997
GO:0034243	regulation of transcription elongation f...	10	2	1.1	0.30279	0.99997
GO:0045948	positive regulation of translational ini...	10	2	1.1	0.30279	0.99997
GO:0046006	regulation of activated T cell prolifera...	10	2	1.1	0.30279	0.99997
GO:0046635	positive regulation of alpha-beta T cell...	10	2	1.1	0.30279	0.99997
GO:0050765	negative regulation of phagocytosis	10	2	1.1	0.30279	0.99997
GO:0051354	negative regulation of oxidoreductase ac...	10	2	1.1	0.30279	0.99997
GO:0060039	pericardium development	10	2	1.1	0.30279	0.99997
GO:0061647	histone H3-K9 modification	10	2	1.1	0.30279	0.99997
GO:0070670	response to interleukin-4	10	2	1.1	0.30279	0.99997
GO:0071514	genetic imprinting	10	2	1.1	0.30279	0.99997
GO:0090051	negative regulation of cell migration in...	10	2	1.1	0.30279	0.99997
GO:0090314	positive regulation of protein targeting...	10	2	1.1	0.30279	0.99997
GO:0097062	dendritic spine maintenance	10	2	1.1	0.30279	0.99997
GO:0097300	programmed necrotic cell death	10	2	1.1	0.30279	0.99997
GO:0099172	presynapse organization	10	2	1.1	0.30279	0.99997
GO:1902235	regulation of endoplasmic reticulum stre...	10	2	1.1	0.30279	0.99997
GO:1903318	negative regulation of protein maturatio...	10	2	1.1	0.30279	0.99997
GO:1902533	positive regulation of intracellular sig...	264	32	29.04	0.30301	0.99997
GO:0031396	regulation of protein ubiquitination	58	8	6.38	0.30352	0.99997
GO:1903039	positive regulation of leukocyte cell-ce...	58	8	6.38	0.30352	0.99997
GO:0022409	positive regulation of cell-cell adhesio...	75	10	8.25	0.30800	0.99997
GO:0033500	carbohydrate homeostasis	75	10	8.25	0.30800	0.99997
GO:0042593	glucose homeostasis	75	10	8.25	0.30800	0.99997
GO:0097191	extrinsic apoptotic signaling pathway	75	10	8.25	0.30800	0.99997
GO:0002790	peptide secretion	109	14	11.99	0.30940	0.99997
GO:0050867	positive regulation of cell activation	92	12	10.12	0.30953	0.99997
GO:0060627	regulation of vesicle-mediated transport	178	22	19.58	0.31144	0.99997
GO:0001906	cell killing	42	6	4.62	0.31313	0.99997
GO:0002366	leukocyte activation involved in immune ...	67	9	7.37	0.31418	0.99997
GO:0031349	positive regulation of defense response	67	9	7.37	0.31418	0.99997
GO:0050807	regulation of synapse organization	67	9	7.37	0.31418	0.99997
GO:0019932	second-messenger-mediated signaling	84	11	9.24	0.31611	0.99997
GO:0070661	leukocyte proliferation	84	11	9.24	0.31611	0.99997
GO:1901293	nucleoside phosphate biosynthetic proces...	84	11	9.24	0.31611	0.99997
GO:0007368	determination of left/right symmetry	34	5	3.74	0.31698	0.99997
GO:1903557	positive regulation of tumor necrosis fa...	34	5	3.74	0.31698	0.99997
GO:2000278	regulation of DNA biosynthetic process	34	5	3.74	0.31698	0.99997
GO:0001937	negative regulation of endothelial cell ...	18	3	1.98	0.31720	0.99997
GO:0002720	positive regulation of cytokine producti...	18	3	1.98	0.31720	0.99997
GO:0010507	negative regulation of autophagy	18	3	1.98	0.31720	0.99997
GO:0032371	regulation of sterol transport	18	3	1.98	0.31720	0.99997
GO:0032374	regulation of cholesterol transport	18	3	1.98	0.31720	0.99997
GO:0032615	interleukin-12 production	18	3	1.98	0.31720	0.99997
GO:0032655	regulation of interleukin-12 production	18	3	1.98	0.31720	0.99997
GO:0032729	positive regulation of interferon-gamma ...	18	3	1.98	0.31720	0.99997
GO:0034502	protein localization to chromosome	18	3	1.98	0.31720	0.99997
GO:0034605	cellular response to heat	18	3	1.98	0.31720	0.99997
GO:0035456	response to interferon-beta	18	3	1.98	0.31720	0.99997
GO:0042102	positive regulation of T cell proliferat...	18	3	1.98	0.31720	0.99997
GO:0042475	odontogenesis of dentin-containing tooth	18	3	1.98	0.31720	0.99997
GO:0043367	CD4-positive, alpha-beta T cell differen...	18	3	1.98	0.31720	0.99997
GO:0048255	mRNA stabilization	18	3	1.98	0.31720	0.99997
GO:0050854	regulation of antigen receptor-mediated ...	18	3	1.98	0.31720	0.99997
GO:0061844	antimicrobial humoral immune response me...	18	3	1.98	0.31720	0.99997
GO:2001251	negative regulation of chromosome organi...	18	3	1.98	0.31720	0.99997
GO:0006476	protein deacetylation	26	4	2.86	0.31913	0.99997
GO:0010827	regulation of glucose transmembrane tran...	26	4	2.86	0.31913	0.99997
GO:0045921	positive regulation of exocytosis	26	4	2.86	0.31913	0.99997
GO:0046888	negative regulation of hormone secretion	26	4	2.86	0.31913	0.99997
GO:0071806	protein transmembrane transport	26	4	2.86	0.31913	0.99997
GO:0001649	osteoblast differentiation	59	8	6.49	0.32051	0.99997
GO:0016358	dendrite development	76	10	8.36	0.32298	0.99997
GO:0007346	regulation of mitotic cell cycle	136	17	14.96	0.32420	0.99997
GO:0048871	multicellular organismal homeostasis	136	17	14.96	0.32420	0.99997
GO:0007416	synapse assembly	43	6	4.73	0.33342	0.99997
GO:0045667	regulation of osteoblast differentiation	43	6	4.73	0.33342	0.99997
GO:0046328	regulation of JNK cascade	43	6	4.73	0.33342	0.99997
GO:0080135	regulation of cellular response to stres...	189	23	20.79	0.33381	0.99997
GO:0032496	response to lipopolysaccharide	77	10	8.47	0.33811	0.99997
GO:0009581	detection of external stimulus	35	5	3.85	0.33970	0.99997
GO:0009582	detection of abiotic stimulus	35	5	3.85	0.33970	0.99997
GO:0045833	negative regulation of lipid metabolic p...	35	5	3.85	0.33970	0.99997
GO:0051897	positive regulation of protein kinase B ...	35	5	3.85	0.33970	0.99997
GO:0048872	homeostasis of number of cells	103	13	11.33	0.34220	0.99997
GO:0001754	eye photoreceptor cell differentiation	11	2	1.21	0.34523	0.99997
GO:0001832	blastocyst growth	11	2	1.21	0.34523	0.99997
GO:0002082	regulation of oxidative phosphorylation	11	2	1.21	0.34523	0.99997
GO:0006458	'de novo' protein folding	11	2	1.21	0.34523	0.99997
GO:0006778	porphyrin-containing compound metabolic ...	11	2	1.21	0.34523	0.99997
GO:0010463	mesenchymal cell proliferation	11	2	1.21	0.34523	0.99997
GO:0010714	positive regulation of collagen metaboli...	11	2	1.21	0.34523	0.99997
GO:0019228	neuronal action potential	11	2	1.21	0.34523	0.99997
GO:0019432	triglyceride biosynthetic process	11	2	1.21	0.34523	0.99997
GO:0022617	extracellular matrix disassembly	11	2	1.21	0.34523	0.99997
GO:0031643	positive regulation of myelination	11	2	1.21	0.34523	0.99997
GO:0032373	positive regulation of sterol transport	11	2	1.21	0.34523	0.99997
GO:0032376	positive regulation of cholesterol trans...	11	2	1.21	0.34523	0.99997
GO:0032967	positive regulation of collagen biosynth...	11	2	1.21	0.34523	0.99997
GO:0033144	negative regulation of intracellular ste...	11	2	1.21	0.34523	0.99997
GO:0042461	photoreceptor cell development	11	2	1.21	0.34523	0.99997
GO:0043470	regulation of carbohydrate catabolic pro...	11	2	1.21	0.34523	0.99997
GO:0050999	regulation of nitric-oxide synthase acti...	11	2	1.21	0.34523	0.99997
GO:0051084	'de novo' posttranslational protein fold...	11	2	1.21	0.34523	0.99997
GO:0051968	positive regulation of synaptic transmis...	11	2	1.21	0.34523	0.99997
GO:0060043	regulation of cardiac muscle cell prolif...	11	2	1.21	0.34523	0.99997
GO:0060977	coronary vasculature morphogenesis	11	2	1.21	0.34523	0.99997
GO:0070486	leukocyte aggregation	11	2	1.21	0.34523	0.99997
GO:0090311	regulation of protein deacetylation	11	2	1.21	0.34523	0.99997
GO:2000242	negative regulation of reproductive proc...	11	2	1.21	0.34523	0.99997
GO:2001258	negative regulation of cation channel ac...	11	2	1.21	0.34523	0.99997
GO:0000045	autophagosome assembly	27	4	2.97	0.34529	0.99997
GO:0002824	positive regulation of adaptive immune r...	27	4	2.97	0.34529	0.99997
GO:0006637	acyl-CoA metabolic process	27	4	2.97	0.34529	0.99997
GO:0032651	regulation of interleukin-1 beta product...	27	4	2.97	0.34529	0.99997
GO:0034968	histone lysine methylation	27	4	2.97	0.34529	0.99997
GO:0035383	thioester metabolic process	27	4	2.97	0.34529	0.99997
GO:0070555	response to interleukin-1	27	4	2.97	0.34529	0.99997
GO:1905037	autophagosome organization	27	4	2.97	0.34529	0.99997
GO:0000082	G1/S transition of mitotic cell cycle	52	7	5.72	0.34558	0.99997
GO:0009749	response to glucose	52	7	5.72	0.34558	0.99997
GO:0045727	positive regulation of translation	52	7	5.72	0.34558	0.99997
GO:0002263	cell activation involved in immune respo...	69	9	7.59	0.34629	0.99997
GO:0006164	purine nucleotide biosynthetic process	69	9	7.59	0.34629	0.99997
GO:0090068	positive regulation of cell cycle proces...	69	9	7.59	0.34629	0.99997
GO:0031346	positive regulation of cell projection o...	112	14	12.32	0.34700	0.99997
GO:0045934	negative regulation of nucleobase-contai...	358	42	39.38	0.34849	0.99997
GO:0007007	inner mitochondrial membrane organizatio...	19	3	2.09	0.34882	0.99997
GO:0007528	neuromuscular junction development	19	3	2.09	0.34882	0.99997
GO:0007585	respiratory gaseous exchange by respirat...	19	3	2.09	0.34882	0.99997
GO:0032024	positive regulation of insulin secretion	19	3	2.09	0.34882	0.99997
GO:0032479	regulation of type I interferon producti...	19	3	2.09	0.34882	0.99997
GO:0033120	positive regulation of RNA splicing	19	3	2.09	0.34882	0.99997
GO:0042440	pigment metabolic process	19	3	2.09	0.34882	0.99997
GO:0043299	leukocyte degranulation	19	3	2.09	0.34882	0.99997
GO:0044743	protein transmembrane import into intrac...	19	3	2.09	0.34882	0.99997
GO:0045071	negative regulation of viral genome repl...	19	3	2.09	0.34882	0.99997
GO:0060998	regulation of dendritic spine developmen...	19	3	2.09	0.34882	0.99997
GO:0072348	sulfur compound transport	19	3	2.09	0.34882	0.99997
GO:0140353	lipid export from cell	19	3	2.09	0.34882	0.99997
GO:1902622	regulation of neutrophil migration	19	3	2.09	0.34882	0.99997
GO:1903317	regulation of protein maturation	19	3	2.09	0.34882	0.99997
GO:0006886	intracellular protein transport	305	36	33.55	0.34915	0.99997
GO:0019221	cytokine-mediated signaling pathway	95	12	10.45	0.35050	0.99997
GO:0009967	positive regulation of signal transducti...	403	47	44.33	0.35305	0.99997
GO:0016482	cytosolic transport	44	6	4.84	0.35386	0.99997
GO:0018394	peptidyl-lysine acetylation	44	6	4.84	0.35386	0.99997
GO:0061041	regulation of wound healing	44	6	4.84	0.35386	0.99997
GO:1901216	positive regulation of neuron death	44	6	4.84	0.35386	0.99997
GO:0006836	neurotransmitter transport	61	8	6.71	0.35499	0.99997
GO:0021537	telencephalon development	61	8	6.71	0.35499	0.99997
GO:0010563	negative regulation of phosphorus metabo...	139	17	15.29	0.35839	0.99997
GO:0045936	negative regulation of phosphate metabol...	139	17	15.29	0.35839	0.99997
GO:0006954	inflammatory response	183	22	20.13	0.36098	0.99997
GO:0046390	ribose phosphate biosynthetic process	70	9	7.7	0.36253	0.99997
GO:0007565	female pregnancy	36	5	3.96	0.36253	0.99997
GO:0032612	interleukin-1 production	36	5	3.96	0.36253	0.99997
GO:0046631	alpha-beta T cell activation	36	5	3.96	0.36253	0.99997
GO:2000045	regulation of G1/S transition of mitotic...	36	5	3.96	0.36253	0.99997
GO:2000379	positive regulation of reactive oxygen s...	36	5	3.96	0.36253	0.99997
GO:0006631	fatty acid metabolic process	122	15	13.42	0.36354	0.99997
GO:0051640	organelle localization	157	19	17.27	0.36419	0.99997
GO:0009746	response to hexose	53	7	5.83	0.36431	0.99997
GO:0034284	response to monosaccharide	53	7	5.83	0.36431	0.99997
GO:0051606	detection of stimulus	53	7	5.83	0.36431	0.99997
GO:0071897	DNA biosynthetic process	53	7	5.83	0.36431	0.99997
GO:0010647	positive regulation of cell communicatio...	450	52	49.5	0.36992	0.99997
GO:0001909	leukocyte mediated cytotoxicity	28	4	3.08	0.37149	0.99997
GO:0008625	extrinsic apoptotic signaling pathway vi...	28	4	3.08	0.37149	0.99997
GO:0043506	regulation of JUN kinase activity	28	4	3.08	0.37149	0.99997
GO:0045639	positive regulation of myeloid cell diff...	28	4	3.08	0.37149	0.99997
GO:0048844	artery morphogenesis	28	4	3.08	0.37149	0.99997
GO:0050709	negative regulation of protein secretion	28	4	3.08	0.37149	0.99997
GO:0051053	negative regulation of DNA metabolic pro...	28	4	3.08	0.37149	0.99997
GO:0060249	anatomical structure homeostasis	114	14	12.54	0.37255	0.99997
GO:1903131	mononuclear cell differentiation	114	14	12.54	0.37255	0.99997
GO:0051402	neuron apoptotic process	88	11	9.68	0.37391	0.99997
GO:0007006	mitochondrial membrane organization	45	6	4.95	0.37439	0.99997
GO:0001775	cell activation	273	32	30.03	0.37678	0.99997
GO:0009628	response to abiotic stimulus	282	33	31.02	0.37785	0.99997
GO:0072593	reactive oxygen species metabolic proces...	97	12	10.67	0.37832	0.99997
GO:0006909	phagocytosis	71	9	7.81	0.37885	0.99997
GO:0050803	regulation of synapse structure or activ...	71	9	7.81	0.37885	0.99997
GO:0008380	RNA splicing	132	16	14.52	0.37889	0.99997
GO:0002753	cytoplasmic pattern recognition receptor...	20	3	2.2	0.38028	0.99997
GO:0010972	negative regulation of G2/M transition o...	20	3	2.2	0.38028	0.99997
GO:0021510	spinal cord development	20	3	2.2	0.38028	0.99997
GO:0032606	type I interferon production	20	3	2.2	0.38028	0.99997
GO:0032637	interleukin-8 production	20	3	2.2	0.38028	0.99997
GO:0032677	regulation of interleukin-8 production	20	3	2.2	0.38028	0.99997
GO:0042490	mechanoreceptor differentiation	20	3	2.2	0.38028	0.99997
GO:0050830	defense response to Gram-positive bacter...	20	3	2.2	0.38028	0.99997
GO:0051353	positive regulation of oxidoreductase ac...	20	3	2.2	0.38028	0.99997
GO:1903053	regulation of extracellular matrix organ...	20	3	2.2	0.38028	0.99997
GO:0006479	protein methylation	54	7	5.94	0.38313	0.99997
GO:0008213	protein alkylation	54	7	5.94	0.38313	0.99997
GO:0043122	regulation of I-kappaB kinase/NF-kappaB ...	54	7	5.94	0.38313	0.99997
GO:0043433	negative regulation of DNA-binding trans...	54	7	5.94	0.38313	0.99997
GO:0051896	regulation of protein kinase B signaling	54	7	5.94	0.38313	0.99997
GO:0008643	carbohydrate transport	37	5	4.07	0.38540	0.99997
GO:0009185	ribonucleoside diphosphate metabolic pro...	37	5	4.07	0.38540	0.99997
GO:0090100	positive regulation of transmembrane rec...	37	5	4.07	0.38540	0.99997
GO:1903959	regulation of anion transmembrane transp...	37	5	4.07	0.38540	0.99997
GO:0000002	mitochondrial genome maintenance	12	2	1.32	0.38679	0.99997
GO:0001702	gastrulation with mouth forming second	12	2	1.32	0.38679	0.99997
GO:0001912	positive regulation of leukocyte mediate...	12	2	1.32	0.38679	0.99997
GO:0002711	positive regulation of T cell mediated i...	12	2	1.32	0.38679	0.99997
GO:0006656	phosphatidylcholine biosynthetic process	12	2	1.32	0.38679	0.99997
GO:0007616	long-term memory	12	2	1.32	0.38679	0.99997
GO:0010718	positive regulation of epithelial to mes...	12	2	1.32	0.38679	0.99997
GO:0016556	mRNA modification	12	2	1.32	0.38679	0.99997
GO:0030808	regulation of nucleotide biosynthetic pr...	12	2	1.32	0.38679	0.99997
GO:0031050	dsRNA processing	12	2	1.32	0.38679	0.99997
GO:0032784	regulation of DNA-templated transcriptio...	12	2	1.32	0.38679	0.99997
GO:0032958	inositol phosphate biosynthetic process	12	2	1.32	0.38679	0.99997
GO:0035196	production of miRNAs involved in gene si...	12	2	1.32	0.38679	0.99997
GO:0042092	type 2 immune response	12	2	1.32	0.38679	0.99997
GO:0043370	regulation of CD4-positive, alpha-beta T...	12	2	1.32	0.38679	0.99997
GO:0048384	retinoic acid receptor signaling pathway	12	2	1.32	0.38679	0.99997
GO:0048741	skeletal muscle fiber development	12	2	1.32	0.38679	0.99997
GO:0051972	regulation of telomerase activity	12	2	1.32	0.38679	0.99997
GO:0060142	regulation of syncytium formation by pla...	12	2	1.32	0.38679	0.99997
GO:0060143	positive regulation of syncytium formati...	12	2	1.32	0.38679	0.99997
GO:0070918	production of small RNA involved in gene...	12	2	1.32	0.38679	0.99997
GO:0072091	regulation of stem cell proliferation	12	2	1.32	0.38679	0.99997
GO:0072395	signal transduction involved in cell cyc...	12	2	1.32	0.38679	0.99997
GO:0072401	signal transduction involved in DNA inte...	12	2	1.32	0.38679	0.99997
GO:0072422	signal transduction involved in DNA dama...	12	2	1.32	0.38679	0.99997
GO:0097194	execution phase of apoptosis	12	2	1.32	0.38679	0.99997
GO:0120163	negative regulation of cold-induced ther...	12	2	1.32	0.38679	0.99997
GO:1900077	negative regulation of cellular response...	12	2	1.32	0.38679	0.99997
GO:1900371	regulation of purine nucleotide biosynth...	12	2	1.32	0.38679	0.99997
GO:1901099	negative regulation of signal transducti...	12	2	1.32	0.38679	0.99997
GO:1990748	cellular detoxification	12	2	1.32	0.38679	0.99997
GO:2000758	positive regulation of peptidyl-lysine a...	12	2	1.32	0.38679	0.99997
GO:2001240	negative regulation of extrinsic apoptot...	12	2	1.32	0.38679	0.99997
GO:0098656	anion transmembrane transport	124	15	13.64	0.38834	0.99997
GO:0006650	glycerophospholipid metabolic process	89	11	9.79	0.38857	0.99997
GO:0045087	innate immune response	177	21	19.47	0.38984	0.99997
GO:0002274	myeloid leukocyte activation	63	8	6.93	0.38986	0.99997
GO:0007249	I-kappaB kinase/NF-kappaB signaling	63	8	6.93	0.38986	0.99997
GO:0023056	positive regulation of signaling	453	52	49.83	0.38997	0.99997
GO:0030099	myeloid cell differentiation	133	16	14.63	0.39091	0.99997
GO:0006281	DNA repair	142	17	15.62	0.39321	0.99997
GO:0031400	negative regulation of protein modificat...	142	17	15.62	0.39321	0.99997
GO:0009132	nucleoside diphosphate metabolic process	46	6	5.06	0.39495	0.99997
GO:0031056	regulation of histone modification	46	6	5.06	0.39495	0.99997
GO:0071333	cellular response to glucose stimulus	46	6	5.06	0.39495	0.99997
GO:0033044	regulation of chromosome organization	72	9	7.92	0.39523	0.99997
GO:0046651	lymphocyte proliferation	72	9	7.92	0.39523	0.99997
GO:0002792	negative regulation of peptide secretion	29	4	3.19	0.39761	0.99997
GO:0002821	positive regulation of adaptive immune r...	29	4	3.19	0.39761	0.99997
GO:0015837	amine transport	29	4	3.19	0.39761	0.99997
GO:0030326	embryonic limb morphogenesis	29	4	3.19	0.39761	0.99997
GO:0032755	positive regulation of interleukin-6 pro...	29	4	3.19	0.39761	0.99997
GO:0035113	embryonic appendage morphogenesis	29	4	3.19	0.39761	0.99997
GO:0045621	positive regulation of lymphocyte differ...	29	4	3.19	0.39761	0.99997
GO:0051952	regulation of amine transport	29	4	3.19	0.39761	0.99997
GO:0061178	regulation of insulin secretion involved...	29	4	3.19	0.39761	0.99997
GO:0070830	bicellular tight junction assembly	29	4	3.19	0.39761	0.99997
GO:0009165	nucleotide biosynthetic process	81	10	8.91	0.39962	0.99997
GO:0051726	regulation of cell cycle	276	32	30.36	0.40220	0.99997
GO:0051090	regulation of DNA-binding transcription ...	134	16	14.74	0.40298	0.99997
GO:0045787	positive regulation of cell cycle	99	12	10.89	0.40637	0.99997
GO:0007179	transforming growth factor beta receptor...	64	8	7.04	0.40736	0.99997
GO:0009152	purine ribonucleotide biosynthetic proce...	64	8	7.04	0.40736	0.99997
GO:0006259	DNA metabolic process	241	28	26.51	0.40795	0.99997
GO:0050714	positive regulation of protein secretion	38	5	4.18	0.40823	0.99997
GO:0006289	nucleotide-excision repair	21	3	2.31	0.41140	0.99997
GO:0006487	protein N-linked glycosylation	21	3	2.31	0.41140	0.99997
GO:0009166	nucleotide catabolic process	21	3	2.31	0.41140	0.99997
GO:0031341	regulation of cell killing	21	3	2.31	0.41140	0.99997
GO:0043489	RNA stabilization	21	3	2.31	0.41140	0.99997
GO:0046847	filopodium assembly	21	3	2.31	0.41140	0.99997
GO:0051289	protein homotetramerization	21	3	2.31	0.41140	0.99997
GO:0071347	cellular response to interleukin-1	21	3	2.31	0.41140	0.99997
GO:0090278	negative regulation of peptide hormone s...	21	3	2.31	0.41140	0.99997
GO:1903428	positive regulation of reactive oxygen s...	21	3	2.31	0.41140	0.99997
GO:0032943	mononuclear cell proliferation	73	9	8.03	0.41164	0.99997
GO:0072522	purine-containing compound biosynthetic ...	73	9	8.03	0.41164	0.99997
GO:0008285	negative regulation of cell population p...	197	23	21.67	0.41303	0.99997
GO:0045088	regulation of innate immune response	47	6	5.17	0.41549	0.99997
GO:0071326	cellular response to monosaccharide stim...	47	6	5.17	0.41549	0.99997
GO:0071331	cellular response to hexose stimulus	47	6	5.17	0.41549	0.99997
GO:1903409	reactive oxygen species biosynthetic pro...	47	6	5.17	0.41549	0.99997
GO:0072001	renal system development	91	11	10.01	0.41801	0.99997
GO:0030098	lymphocyte differentiation	100	12	11	0.42044	0.99997
GO:0042098	T cell proliferation	56	7	6.16	0.42079	0.99997
GO:0014743	regulation of muscle hypertrophy	30	4	3.3	0.42355	0.99997
GO:0031058	positive regulation of histone modificat...	30	4	3.3	0.42355	0.99997
GO:0032611	interleukin-1 beta production	30	4	3.3	0.42355	0.99997
GO:0035773	insulin secretion involved in cellular r...	30	4	3.3	0.42355	0.99997
GO:0051225	spindle assembly	30	4	3.3	0.42355	0.99997
GO:0061951	establishment of protein localization to...	30	4	3.3	0.42355	0.99997
GO:0120192	tight junction assembly	30	4	3.3	0.42355	0.99997
GO:0002691	regulation of cellular extravasation	13	2	1.43	0.42715	0.99997
GO:0002931	response to ischemia	13	2	1.43	0.42715	0.99997
GO:0009069	serine family amino acid metabolic proce...	13	2	1.43	0.42715	0.99997
GO:0009154	purine ribonucleotide catabolic process	13	2	1.43	0.42715	0.99997
GO:0010862	positive regulation of pathway-restricte...	13	2	1.43	0.42715	0.99997
GO:0014904	myotube cell development	13	2	1.43	0.42715	0.99997
GO:0030488	tRNA methylation	13	2	1.43	0.42715	0.99997
GO:0030513	positive regulation of BMP signaling pat...	13	2	1.43	0.42715	0.99997
GO:0031297	replication fork processing	13	2	1.43	0.42715	0.99997
GO:0031343	positive regulation of cell killing	13	2	1.43	0.42715	0.99997
GO:0031646	positive regulation of nervous system pr...	13	2	1.43	0.42715	0.99997
GO:0032692	negative regulation of interleukin-1 pro...	13	2	1.43	0.42715	0.99997
GO:0032735	positive regulation of interleukin-12 pr...	13	2	1.43	0.42715	0.99997
GO:0035308	negative regulation of protein dephospho...	13	2	1.43	0.42715	0.99997
GO:0042733	embryonic digit morphogenesis	13	2	1.43	0.42715	0.99997
GO:0044786	cell cycle DNA replication	13	2	1.43	0.42715	0.99997
GO:0045058	T cell selection	13	2	1.43	0.42715	0.99997
GO:0050919	negative chemotaxis	13	2	1.43	0.42715	0.99997
GO:0061014	positive regulation of mRNA catabolic pr...	13	2	1.43	0.42715	0.99997
GO:0071624	positive regulation of granulocyte chemo...	13	2	1.43	0.42715	0.99997
GO:0072583	clathrin-dependent endocytosis	13	2	1.43	0.42715	0.99997
GO:0090023	positive regulation of neutrophil chemot...	13	2	1.43	0.42715	0.99997
GO:0097028	dendritic cell differentiation	13	2	1.43	0.42715	0.99997
GO:1903573	negative regulation of response to endop...	13	2	1.43	0.42715	0.99997
GO:0044265	cellular macromolecule catabolic process	279	32	30.69	0.42785	0.99997
GO:0002685	regulation of leukocyte migration	74	9	8.14	0.42804	0.99997
GO:0043547	positive regulation of GTPase activity	74	9	8.14	0.42804	0.99997
GO:0019725	cellular homeostasis	297	34	32.67	0.42847	0.99997
GO:0001764	neuron migration	39	5	4.29	0.43094	0.99997
GO:0006892	post-Golgi vesicle-mediated transport	39	5	4.29	0.43094	0.99997
GO:0071453	cellular response to oxygen levels	39	5	4.29	0.43094	0.99997
GO:0001654	eye development	101	12	11.11	0.43451	0.99997
GO:0002244	hematopoietic progenitor cell differenti...	48	6	5.28	0.43595	0.99997
GO:0007605	sensory perception of sound	48	6	5.28	0.43595	0.99997
GO:0050806	positive regulation of synaptic transmis...	48	6	5.28	0.43595	0.99997
GO:2001252	positive regulation of chromosome organi...	48	6	5.28	0.43595	0.99997
GO:0002526	acute inflammatory response	22	3	2.42	0.44201	0.99997
GO:0006094	gluconeogenesis	22	3	2.42	0.44201	0.99997
GO:0006360	transcription by RNA polymerase I	22	3	2.42	0.44201	0.99997
GO:0008088	axo-dendritic transport	22	3	2.42	0.44201	0.99997
GO:0010596	negative regulation of endothelial cell ...	22	3	2.42	0.44201	0.99997
GO:0045670	regulation of osteoclast differentiation	22	3	2.42	0.44201	0.99997
GO:0046580	negative regulation of Ras protein signa...	22	3	2.42	0.44201	0.99997
GO:0051298	centrosome duplication	22	3	2.42	0.44201	0.99997
GO:0060389	pathway-restricted SMAD protein phosphor...	22	3	2.42	0.44201	0.99997
GO:1900076	regulation of cellular response to insul...	22	3	2.42	0.44201	0.99997
GO:1902750	negative regulation of cell cycle G2/M p...	22	3	2.42	0.44201	0.99997
GO:1905897	regulation of response to endoplasmic re...	22	3	2.42	0.44201	0.99997
GO:1901137	carbohydrate derivative biosynthetic pro...	182	21	20.02	0.44251	0.99997
GO:0070925	organelle assembly	236	27	25.96	0.44436	0.99997
GO:0071560	cellular response to transforming growth...	75	9	8.25	0.44440	0.99997
GO:0006518	peptide metabolic process	281	32	30.91	0.44503	0.99997
GO:1902105	regulation of leukocyte differentiation	84	10	9.24	0.44609	0.99997
GO:0048880	sensory system development	102	12	11.22	0.44857	0.99997
GO:0150063	visual system development	102	12	11.22	0.44857	0.99997
GO:0001959	regulation of cytokine-mediated signalin...	31	4	3.41	0.44920	0.99997
GO:0030168	platelet activation	31	4	3.41	0.44920	0.99997
GO:0031123	RNA 3'-end processing	31	4	3.41	0.44920	0.99997
GO:0033865	nucleoside bisphosphate metabolic proces...	31	4	3.41	0.44920	0.99997
GO:0033875	ribonucleoside bisphosphate metabolic pr...	31	4	3.41	0.44920	0.99997
GO:0034032	purine nucleoside bisphosphate metabolic...	31	4	3.41	0.44920	0.99997
GO:0035270	endocrine system development	31	4	3.41	0.44920	0.99997
GO:0046683	response to organophosphorus	31	4	3.41	0.44920	0.99997
GO:0090630	activation of GTPase activity	31	4	3.41	0.44920	0.99997
GO:1905269	positive regulation of chromatin organiz...	31	4	3.41	0.44920	0.99997
GO:2001237	negative regulation of extrinsic apoptot...	31	4	3.41	0.44920	0.99997
GO:0009890	negative regulation of biosynthetic proc...	390	44	42.9	0.45241	0.99997
GO:0031327	negative regulation of cellular biosynth...	372	42	40.92	0.45268	0.99997
GO:0002688	regulation of leukocyte chemotaxis	40	5	4.4	0.45347	0.99997
GO:0055076	transition metal ion homeostasis	40	5	4.4	0.45347	0.99997
GO:0045321	leukocyte activation	237	27	26.07	0.45369	0.99997
GO:0043524	negative regulation of neuron apoptotic ...	49	6	5.39	0.45627	0.99997
GO:0000209	protein polyubiquitination	58	7	6.38	0.45823	0.99997
GO:0032872	regulation of stress-activated MAPK casc...	58	7	6.38	0.45823	0.99997
GO:0033108	mitochondrial respiratory chain complex ...	58	7	6.38	0.45823	0.99997
GO:0050731	positive regulation of peptidyl-tyrosine...	58	7	6.38	0.45823	0.99997
GO:0060491	regulation of cell projection assembly	58	7	6.38	0.45823	0.99997
GO:0070302	regulation of stress-activated protein k...	58	7	6.38	0.45823	0.99997
GO:0099111	microtubule-based transport	58	7	6.38	0.45823	0.99997
GO:0120032	regulation of plasma membrane bounded ce...	58	7	6.38	0.45823	0.99997
GO:1903034	regulation of response to wounding	58	7	6.38	0.45823	0.99997
GO:0009260	ribonucleotide biosynthetic process	67	8	7.37	0.45966	0.99997
GO:0051403	stress-activated MAPK cascade	76	9	8.36	0.46072	0.99997
GO:0009057	macromolecule catabolic process	346	39	38.06	0.46087	0.99997
GO:0006412	translation	220	25	24.2	0.46329	0.99997
GO:0006979	response to oxidative stress	130	15	14.3	0.46341	0.99997
GO:1902531	regulation of intracellular signal trans...	464	52	51.04	0.46488	0.99997
GO:0006111	regulation of gluconeogenesis	14	2	1.54	0.46607	0.99997
GO:0007588	excretion	14	2	1.54	0.46607	0.99997
GO:0010830	regulation of myotube differentiation	14	2	1.54	0.46607	0.99997
GO:0021545	cranial nerve development	14	2	1.54	0.46607	0.99997
GO:0030150	protein import into mitochondrial matrix	14	2	1.54	0.46607	0.99997
GO:0030195	negative regulation of blood coagulation	14	2	1.54	0.46607	0.99997
GO:0033013	tetrapyrrole metabolic process	14	2	1.54	0.46607	0.99997
GO:0035315	hair cell differentiation	14	2	1.54	0.46607	0.99997
GO:0043331	response to dsRNA	14	2	1.54	0.46607	0.99997
GO:0045601	regulation of endothelial cell different...	14	2	1.54	0.46607	0.99997
GO:0046460	neutral lipid biosynthetic process	14	2	1.54	0.46607	0.99997
GO:0046463	acylglycerol biosynthetic process	14	2	1.54	0.46607	0.99997
GO:0048169	regulation of long-term neuronal synapti...	14	2	1.54	0.46607	0.99997
GO:0071300	cellular response to retinoic acid	14	2	1.54	0.46607	0.99997
GO:0071364	cellular response to epidermal growth fa...	14	2	1.54	0.46607	0.99997
GO:0098661	inorganic anion transmembrane transport	14	2	1.54	0.46607	0.99997
GO:0098801	regulation of renal system process	14	2	1.54	0.46607	0.99997
GO:1903725	regulation of phospholipid metabolic pro...	14	2	1.54	0.46607	0.99997
GO:2000107	negative regulation of leukocyte apoptot...	14	2	1.54	0.46607	0.99997
GO:0010558	negative regulation of macromolecule bio...	356	40	39.16	0.46840	0.99997
GO:0002562	somatic diversification of immune recept...	23	3	2.53	0.47198	0.99997
GO:0003281	ventricular septum development	23	3	2.53	0.47198	0.99997
GO:0016239	positive regulation of macroautophagy	23	3	2.53	0.47198	0.99997
GO:0016444	somatic cell DNA recombination	23	3	2.53	0.47198	0.99997
GO:0019226	transmission of nerve impulse	23	3	2.53	0.47198	0.99997
GO:0019319	hexose biosynthetic process	23	3	2.53	0.47198	0.99997
GO:0033619	membrane protein proteolysis	23	3	2.53	0.47198	0.99997
GO:0051937	catecholamine transport	23	3	2.53	0.47198	0.99997
GO:0099518	vesicle cytoskeletal trafficking	23	3	2.53	0.47198	0.99997
GO:0006875	cellular metal ion homeostasis	185	21	20.35	0.47419	0.99997
GO:0008584	male gonad development	32	4	3.52	0.47449	0.99997
GO:0030316	osteoclast differentiation	32	4	3.52	0.47449	0.99997
GO:0042472	inner ear morphogenesis	32	4	3.52	0.47449	0.99997
GO:0046546	development of primary male sexual chara...	32	4	3.52	0.47449	0.99997
GO:0050905	neuromuscular process	32	4	3.52	0.47449	0.99997
GO:0120193	tight junction organization	32	4	3.52	0.47449	0.99997
GO:0000724	double-strand break repair via homologou...	41	5	4.51	0.47575	0.99997
GO:0000725	recombinational repair	41	5	4.51	0.47575	0.99997
GO:0032675	regulation of interleukin-6 production	41	5	4.51	0.47575	0.99997
GO:0034766	negative regulation of ion transmembrane...	41	5	4.51	0.47575	0.99997
GO:2000058	regulation of ubiquitin-dependent protei...	41	5	4.51	0.47575	0.99997
GO:0001678	cellular glucose homeostasis	50	6	5.5	0.47642	0.99997
GO:0003205	cardiac chamber development	50	6	5.5	0.47642	0.99997
GO:0003158	endothelium development	59	7	6.49	0.47677	0.99997
GO:0032869	cellular response to insulin stimulus	59	7	6.49	0.47677	0.99997
GO:0071559	response to transforming growth factor b...	77	9	8.47	0.47694	0.99997
GO:0001934	positive regulation of protein phosphory...	231	26	25.41	0.48215	0.99997
GO:0098542	defense response to other organism	231	26	25.41	0.48215	0.99997
GO:0032787	monocarboxylic acid metabolic process	177	20	19.47	0.48527	0.99997
GO:0007423	sensory organ development	150	17	16.5	0.48704	0.99997
GO:0001819	positive regulation of cytokine producti...	123	14	13.53	0.48901	0.99997
GO:0032101	regulation of response to external stimu...	259	29	28.49	0.48973	0.99997
GO:0016570	histone modification	105	12	11.55	0.49049	0.99997
GO:0006952	defense response	368	41	40.48	0.49102	0.99997
GO:1903320	regulation of protein modification by sm...	69	8	7.59	0.49405	0.99997
GO:2000377	regulation of reactive oxygen species me...	69	8	7.59	0.49405	0.99997
GO:2001234	negative regulation of apoptotic signali...	69	8	7.59	0.49405	0.99997
GO:0002440	production of molecular mediator of immu...	60	7	6.6	0.49514	0.99997
GO:0007596	blood coagulation	60	7	6.6	0.49514	0.99997
GO:0050921	positive regulation of chemotaxis	51	6	5.61	0.49635	0.99997
GO:0009142	nucleoside triphosphate biosynthetic pro...	42	5	4.62	0.49773	0.99997
GO:0015908	fatty acid transport	42	5	4.62	0.49773	0.99997
GO:0034763	negative regulation of transmembrane tra...	42	5	4.62	0.49773	0.99997
GO:0044706	multi-multicellular organism process	42	5	4.62	0.49773	0.99997
GO:0050680	negative regulation of epithelial cell p...	42	5	4.62	0.49773	0.99997
GO:1903426	regulation of reactive oxygen species bi...	42	5	4.62	0.49773	0.99997
GO:1905477	positive regulation of protein localizat...	42	5	4.62	0.49773	0.99997
GO:0006754	ATP biosynthetic process	33	4	3.63	0.49932	0.99997
GO:0010633	negative regulation of epithelial cell m...	33	4	3.63	0.49932	0.99997
GO:0032434	regulation of proteasomal ubiquitin-depe...	33	4	3.63	0.49932	0.99997
GO:0070665	positive regulation of leukocyte prolife...	33	4	3.63	0.49932	0.99997
GO:0002286	T cell activation involved in immune res...	24	3	2.64	0.50120	0.99997
GO:0033209	tumor necrosis factor-mediated signaling...	24	3	2.64	0.50120	0.99997
GO:0036473	cell death in response to oxidative stre...	24	3	2.64	0.50120	0.99997
GO:0046470	phosphatidylcholine metabolic process	24	3	2.64	0.50120	0.99997
GO:0051058	negative regulation of small GTPase medi...	24	3	2.64	0.50120	0.99997
GO:0071156	regulation of cell cycle arrest	24	3	2.64	0.50120	0.99997
GO:2000378	negative regulation of reactive oxygen s...	24	3	2.64	0.50120	0.99997
GO:0001974	blood vessel remodeling	15	2	1.65	0.50337	0.99997
GO:0003170	heart valve development	15	2	1.65	0.50337	0.99997
GO:0006195	purine nucleotide catabolic process	15	2	1.65	0.50337	0.99997
GO:0007032	endosome organization	15	2	1.65	0.50337	0.99997
GO:0010614	negative regulation of cardiac muscle hy...	15	2	1.65	0.50337	0.99997
GO:0016202	regulation of striated muscle tissue dev...	15	2	1.65	0.50337	0.99997
GO:0030866	cortical actin cytoskeleton organization	15	2	1.65	0.50337	0.99997
GO:0031640	killing of cells of other organism	15	2	1.65	0.50337	0.99997
GO:0032922	circadian regulation of gene expression	15	2	1.65	0.50337	0.99997
GO:0032965	regulation of collagen biosynthetic proc...	15	2	1.65	0.50337	0.99997
GO:0034113	heterotypic cell-cell adhesion	15	2	1.65	0.50337	0.99997
GO:0042398	cellular modified amino acid biosyntheti...	15	2	1.65	0.50337	0.99997
GO:0043551	regulation of phosphatidylinositol 3-kin...	15	2	1.65	0.50337	0.99997
GO:0043618	regulation of transcription from RNA pol...	15	2	1.65	0.50337	0.99997
GO:0046530	photoreceptor cell differentiation	15	2	1.65	0.50337	0.99997
GO:0046637	regulation of alpha-beta T cell differen...	15	2	1.65	0.50337	0.99997
GO:0047496	vesicle transport along microtubule	15	2	1.65	0.50337	0.99997
GO:0048489	synaptic vesicle transport	15	2	1.65	0.50337	0.99997
GO:0048645	animal organ formation	15	2	1.65	0.50337	0.99997
GO:0048701	embryonic cranial skeleton morphogenesis	15	2	1.65	0.50337	0.99997
GO:0050819	negative regulation of coagulation	15	2	1.65	0.50337	0.99997
GO:0051154	negative regulation of striated muscle c...	15	2	1.65	0.50337	0.99997
GO:0051851	modulation by host of symbiont process	15	2	1.65	0.50337	0.99997
GO:0055078	sodium ion homeostasis	15	2	1.65	0.50337	0.99997
GO:0060038	cardiac muscle cell proliferation	15	2	1.65	0.50337	0.99997
GO:0060079	excitatory postsynaptic potential	15	2	1.65	0.50337	0.99997
GO:0060632	regulation of microtubule-based movement	15	2	1.65	0.50337	0.99997
GO:0061756	leukocyte adhesion to vascular endotheli...	15	2	1.65	0.50337	0.99997
GO:0070098	chemokine-mediated signaling pathway	15	2	1.65	0.50337	0.99997
GO:0090022	regulation of neutrophil chemotaxis	15	2	1.65	0.50337	0.99997
GO:0097237	cellular response to toxic substance	15	2	1.65	0.50337	0.99997
GO:0140354	lipid import into cell	15	2	1.65	0.50337	0.99997
GO:1900047	negative regulation of hemostasis	15	2	1.65	0.50337	0.99997
GO:1903961	positive regulation of anion transmembra...	15	2	1.65	0.50337	0.99997
GO:0030198	extracellular matrix organization	106	12	11.66	0.50432	0.99997
GO:0043062	extracellular structure organization	106	12	11.66	0.50432	0.99997
GO:0045229	external encapsulating structure organiz...	106	12	11.66	0.50432	0.99997
GO:0000375	RNA splicing, via transesterification re...	88	10	9.68	0.50730	0.99997
GO:0000377	RNA splicing, via transesterification re...	88	10	9.68	0.50730	0.99997
GO:0000398	mRNA splicing, via spliceosome	88	10	9.68	0.50730	0.99997
GO:0001822	kidney development	88	10	9.68	0.50730	0.99997
GO:0002696	positive regulation of leukocyte activat...	88	10	9.68	0.50730	0.99997
GO:0030900	forebrain development	88	10	9.68	0.50730	0.99997
GO:0051091	positive regulation of DNA-binding trans...	79	9	8.69	0.50905	0.99997
GO:0097529	myeloid leukocyte migration	79	9	8.69	0.50905	0.99997
GO:0008360	regulation of cell shape	70	8	7.7	0.51102	0.99997
GO:0140053	mitochondrial gene expression	70	8	7.7	0.51102	0.99997
GO:0006163	purine nucleotide metabolic process	134	15	14.74	0.51303	0.99997
GO:0001505	regulation of neurotransmitter levels	61	7	6.71	0.51331	0.99997
GO:0007599	hemostasis	61	7	6.71	0.51331	0.99997
GO:0050817	coagulation	61	7	6.71	0.51331	0.99997
GO:0071241	cellular response to inorganic substance	52	6	5.72	0.51602	0.99997
GO:0099504	synaptic vesicle cycle	52	6	5.72	0.51602	0.99997
GO:2001236	regulation of extrinsic apoptotic signal...	52	6	5.72	0.51602	0.99997
GO:0016192	vesicle-mediated transport	426	47	46.86	0.51646	0.99997
GO:0016569	covalent chromatin modification	107	12	11.77	0.51806	0.99997
GO:0001508	action potential	43	5	4.73	0.51934	0.99997
GO:0001889	liver development	43	5	4.73	0.51934	0.99997
GO:0006475	internal protein amino acid acetylation	43	5	4.73	0.51934	0.99997
GO:0006888	endoplasmic reticulum to Golgi vesicle-m...	43	5	4.73	0.51934	0.99997
GO:0018393	internal peptidyl-lysine acetylation	43	5	4.73	0.51934	0.99997
GO:0031644	regulation of nervous system process	43	5	4.73	0.51934	0.99997
GO:0032635	interleukin-6 production	43	5	4.73	0.51934	0.99997
GO:0033135	regulation of peptidyl-serine phosphoryl...	43	5	4.73	0.51934	0.99997
GO:0043535	regulation of blood vessel endothelial c...	43	5	4.73	0.51934	0.99997
GO:0046467	membrane lipid biosynthetic process	43	5	4.73	0.51934	0.99997
GO:0061008	hepaticobiliary system development	43	5	4.73	0.51934	0.99997
GO:0090090	negative regulation of canonical Wnt sig...	43	5	4.73	0.51934	0.99997
GO:0007159	leukocyte cell-cell adhesion	98	11	10.78	0.52008	0.99997
GO:0043043	peptide biosynthetic process	226	25	24.86	0.52108	0.99997
GO:0032874	positive regulation of stress-activated ...	34	4	3.74	0.52363	0.99997
GO:0046031	ADP metabolic process	34	4	3.74	0.52363	0.99997
GO:0046887	positive regulation of hormone secretion	34	4	3.74	0.52363	0.99997
GO:0070304	positive regulation of stress-activated ...	34	4	3.74	0.52363	0.99997
GO:0071482	cellular response to light stimulus	34	4	3.74	0.52363	0.99997
GO:0120162	positive regulation of cold-induced ther...	34	4	3.74	0.52363	0.99997
GO:0002831	regulation of response to biotic stimulu...	80	9	8.8	0.52488	0.99997
GO:0051253	negative regulation of RNA metabolic pro...	336	37	36.96	0.52520	0.99997
GO:0055082	cellular chemical homeostasis	254	28	27.94	0.52667	0.99997
GO:0045930	negative regulation of mitotic cell cycl...	71	8	7.81	0.52781	0.99997
GO:1905475	regulation of protein localization to me...	71	8	7.81	0.52781	0.99997
GO:0032103	positive regulation of response to exter...	117	13	12.87	0.52935	0.99997
GO:0002090	regulation of receptor internalization	25	3	2.75	0.52958	0.99997
GO:0002200	somatic diversification of immune recept...	25	3	2.75	0.52958	0.99997
GO:0006893	Golgi to plasma membrane transport	25	3	2.75	0.52958	0.99997
GO:0007498	mesoderm development	25	3	2.75	0.52958	0.99997
GO:0032088	negative regulation of NF-kappaB transcr...	25	3	2.75	0.52958	0.99997
GO:0032526	response to retinoic acid	25	3	2.75	0.52958	0.99997
GO:0035418	protein localization to synapse	25	3	2.75	0.52958	0.99997
GO:0046364	monosaccharide biosynthetic process	25	3	2.75	0.52958	0.99997
GO:0048644	muscle organ morphogenesis	25	3	2.75	0.52958	0.99997
GO:0048706	embryonic skeletal system development	25	3	2.75	0.52958	0.99997
GO:0050435	amyloid-beta metabolic process	25	3	2.75	0.52958	0.99997
GO:1901292	nucleoside phosphate catabolic process	25	3	2.75	0.52958	0.99997
GO:1901992	positive regulation of mitotic cell cycl...	25	3	2.75	0.52958	0.99997
GO:1903313	positive regulation of mRNA metabolic pr...	25	3	2.75	0.52958	0.99997
GO:1904705	regulation of vascular associated smooth...	25	3	2.75	0.52958	0.99997
GO:1990874	vascular associated smooth muscle cell p...	25	3	2.75	0.52958	0.99997
GO:0034250	positive regulation of cellular amide me...	62	7	6.82	0.53124	0.99997
GO:2001020	regulation of response to DNA damage sti...	62	7	6.82	0.53124	0.99997
GO:0072507	divalent inorganic cation homeostasis	163	18	17.93	0.53140	0.99997
GO:0030003	cellular cation homeostasis	200	22	22	0.53513	0.99997
GO:0030048	actin filament-based movement	53	6	5.83	0.53539	0.99997
GO:0030178	negative regulation of Wnt signaling pat...	53	6	5.83	0.53539	0.99997
GO:1902275	regulation of chromatin organization	53	6	5.83	0.53539	0.99997
GO:0072594	establishment of protein localization to...	136	15	14.96	0.53743	0.99997
GO:0001945	lymph vessel development	16	2	1.76	0.53895	0.99997
GO:0002548	monocyte chemotaxis	16	2	1.76	0.53895	0.99997
GO:0006368	transcription elongation from RNA polyme...	16	2	1.76	0.53895	0.99997
GO:0006890	retrograde vesicle-mediated transport, G...	16	2	1.76	0.53895	0.99997
GO:0007606	sensory perception of chemical stimulus	16	2	1.76	0.53895	0.99997
GO:0009953	dorsal/ventral pattern formation	16	2	1.76	0.53895	0.99997
GO:0010712	regulation of collagen metabolic process	16	2	1.76	0.53895	0.99997
GO:0031638	zymogen activation	16	2	1.76	0.53895	0.99997
GO:0032413	negative regulation of ion transmembrane...	16	2	1.76	0.53895	0.99997
GO:0032768	regulation of monooxygenase activity	16	2	1.76	0.53895	0.99997
GO:0044319	wound healing, spreading of cells	16	2	1.76	0.53895	0.99997
GO:0046456	icosanoid biosynthetic process	16	2	1.76	0.53895	0.99997
GO:0046902	regulation of mitochondrial membrane per...	16	2	1.76	0.53895	0.99997
GO:0050873	brown fat cell differentiation	16	2	1.76	0.53895	0.99997
GO:0070265	necrotic cell death	16	2	1.76	0.53895	0.99997
GO:0070527	platelet aggregation	16	2	1.76	0.53895	0.99997
GO:0070849	response to epidermal growth factor	16	2	1.76	0.53895	0.99997
GO:0090504	epiboly	16	2	1.76	0.53895	0.99997
GO:0090505	epiboly involved in wound healing	16	2	1.76	0.53895	0.99997
GO:0097479	synaptic vesicle localization	16	2	1.76	0.53895	0.99997
GO:0098754	detoxification	16	2	1.76	0.53895	0.99997
GO:0099565	chemical synaptic transmission, postsyna...	16	2	1.76	0.53895	0.99997
GO:1903539	protein localization to postsynaptic mem...	16	2	1.76	0.53895	0.99997
GO:1904037	positive regulation of epithelial cell a...	16	2	1.76	0.53895	0.99997
GO:2000514	regulation of CD4-positive, alpha-beta T...	16	2	1.76	0.53895	0.99997
GO:0050808	synapse organization	127	14	13.97	0.53978	0.99997
GO:0006898	receptor-mediated endocytosis	81	9	8.91	0.54054	0.99997
GO:0031098	stress-activated protein kinase signalin...	81	9	8.91	0.54054	0.99997
GO:0002793	positive regulation of peptide secretion	44	5	4.84	0.54056	0.99997
GO:0002822	regulation of adaptive immune response b...	44	5	4.84	0.54056	0.99997
GO:0009612	response to mechanical stimulus	44	5	4.84	0.54056	0.99997
GO:0016052	carbohydrate catabolic process	44	5	4.84	0.54056	0.99997
GO:0006869	lipid transport	118	13	12.98	0.54236	0.99997
GO:0055065	metal ion homeostasis	210	23	23.1	0.54338	0.99997
GO:0010038	response to metal ion	72	8	7.92	0.54438	0.99997
GO:0072503	cellular divalent inorganic cation homeo...	155	17	17.05	0.54464	0.99997
GO:0003341	cilium movement	35	4	3.85	0.54736	0.99997
GO:0009135	purine nucleoside diphosphate metabolic ...	35	4	3.85	0.54736	0.99997
GO:0009179	purine ribonucleoside diphosphate metabo...	35	4	3.85	0.54736	0.99997
GO:0014074	response to purine-containing compound	35	4	3.85	0.54736	0.99997
GO:0014896	muscle hypertrophy	35	4	3.85	0.54736	0.99997
GO:0014897	striated muscle hypertrophy	35	4	3.85	0.54736	0.99997
GO:0015748	organophosphate ester transport	35	4	3.85	0.54736	0.99997
GO:0033138	positive regulation of peptidyl-serine p...	35	4	3.85	0.54736	0.99997
GO:0043297	apical junction assembly	35	4	3.85	0.54736	0.99997
GO:0048259	regulation of receptor-mediated endocyto...	35	4	3.85	0.54736	0.99997
GO:0043491	protein kinase B signaling	63	7	6.93	0.54892	0.99997
GO:0097190	apoptotic signaling pathway	183	20	20.13	0.54907	0.99997
GO:0008284	positive regulation of cell population p...	275	30	30.25	0.55037	0.99997
GO:1901701	cellular response to oxygen-containing c...	321	35	35.31	0.55148	0.99997
GO:0043604	amide biosynthetic process	266	29	29.26	0.55192	0.99997
GO:0010632	regulation of epithelial cell migration	91	10	10.01	0.55193	0.99997
GO:0010035	response to inorganic substance	128	14	14.08	0.55223	0.99997
GO:0098739	import across plasma membrane	54	6	5.94	0.55442	0.99997
GO:0009117	nucleotide metabolic process	156	17	17.16	0.55594	0.99997
GO:0006310	DNA recombination	82	9	9.02	0.55600	0.99997
GO:1903037	regulation of leukocyte cell-cell adhesi...	82	9	9.02	0.55600	0.99997
GO:0000959	mitochondrial RNA metabolic process	26	3	2.86	0.55703	0.99997
GO:0001578	microtubule bundle formation	26	3	2.86	0.55703	0.99997
GO:0001942	hair follicle development	26	3	2.86	0.55703	0.99997
GO:0002708	positive regulation of lymphocyte mediat...	26	3	2.86	0.55703	0.99997
GO:0005977	glycogen metabolic process	26	3	2.86	0.55703	0.99997
GO:0006073	cellular glucan metabolic process	26	3	2.86	0.55703	0.99997
GO:0022404	molting cycle process	26	3	2.86	0.55703	0.99997
GO:0022405	hair cycle process	26	3	2.86	0.55703	0.99997
GO:0044042	glucan metabolic process	26	3	2.86	0.55703	0.99997
GO:0051963	regulation of synapse assembly	26	3	2.86	0.55703	0.99997
GO:0061028	establishment of endothelial barrier	26	3	2.86	0.55703	0.99997
GO:0090277	positive regulation of peptide hormone s...	26	3	2.86	0.55703	0.99997
GO:0043410	positive regulation of MAPK cascade	147	16	16.17	0.55858	0.99997
GO:0001894	tissue homeostasis	73	8	8.03	0.56072	0.99997
GO:0009205	purine ribonucleoside triphosphate metab...	45	5	4.95	0.56133	0.99997
GO:0071383	cellular response to steroid hormone sti...	45	5	4.95	0.56133	0.99997
GO:2000241	regulation of reproductive process	45	5	4.95	0.56133	0.99997
GO:0010876	lipid localization	138	15	15.18	0.56145	0.99997
GO:0051272	positive regulation of cellular componen...	212	23	23.32	0.56289	0.99997
GO:0006873	cellular ion homeostasis	203	22	22.33	0.56507	0.99997
GO:0099003	vesicle-mediated transport in synapse	64	7	7.04	0.56630	0.99997
GO:0042060	wound healing	120	13	13.2	0.56800	0.99997
GO:0002698	negative regulation of immune effector p...	36	4	3.96	0.57047	0.99997
GO:0006165	nucleoside diphosphate phosphorylation	36	4	3.96	0.57047	0.99997
GO:0006612	protein targeting to membrane	36	4	3.96	0.57047	0.99997
GO:0016458	gene silencing	36	4	3.96	0.57047	0.99997
GO:0016571	histone methylation	36	4	3.96	0.57047	0.99997
GO:0021953	central nervous system neuron differenti...	36	4	3.96	0.57047	0.99997
GO:0042471	ear morphogenesis	36	4	3.96	0.57047	0.99997
GO:0048661	positive regulation of smooth muscle cel...	36	4	3.96	0.57047	0.99997
GO:2000113	negative regulation of cellular macromol...	351	38	38.61	0.57065	0.99997
GO:0007178	transmembrane receptor protein serine/th...	111	12	12.21	0.57179	0.99997
GO:0006509	membrane protein ectodomain proteolysis	17	2	1.87	0.57272	0.99997
GO:0006766	vitamin metabolic process	17	2	1.87	0.57272	0.99997
GO:0007584	response to nutrient	17	2	1.87	0.57272	0.99997
GO:0010762	regulation of fibroblast migration	17	2	1.87	0.57272	0.99997
GO:0030433	ubiquitin-dependent ERAD pathway	17	2	1.87	0.57272	0.99997
GO:0034381	plasma lipoprotein particle clearance	17	2	1.87	0.57272	0.99997
GO:0035082	axoneme assembly	17	2	1.87	0.57272	0.99997
GO:0042311	vasodilation	17	2	1.87	0.57272	0.99997
GO:0043620	regulation of DNA-templated transcriptio...	17	2	1.87	0.57272	0.99997
GO:0043647	inositol phosphate metabolic process	17	2	1.87	0.57272	0.99997
GO:0051965	positive regulation of synapse assembly	17	2	1.87	0.57272	0.99997
GO:0052372	modulation by symbiont of entry into hos...	17	2	1.87	0.57272	0.99997
GO:0070570	regulation of neuron projection regenera...	17	2	1.87	0.57272	0.99997
GO:0070839	metal ion export	17	2	1.87	0.57272	0.99997
GO:0090398	cellular senescence	17	2	1.87	0.57272	0.99997
GO:0098781	ncRNA transcription	17	2	1.87	0.57272	0.99997
GO:1901068	guanosine-containing compound metabolic ...	17	2	1.87	0.57272	0.99997
GO:1902017	regulation of cilium assembly	17	2	1.87	0.57272	0.99997
GO:1902041	regulation of extrinsic apoptotic signal...	17	2	1.87	0.57272	0.99997
GO:1905476	negative regulation of protein localizat...	17	2	1.87	0.57272	0.99997
GO:0000302	response to reactive oxygen species	55	6	6.05	0.57309	0.99997
GO:0048545	response to steroid hormone	55	6	6.05	0.57309	0.99997
GO:0031401	positive regulation of protein modificat...	287	31	31.57	0.57417	0.99997
GO:1903047	mitotic cell cycle process	204	22	22.44	0.57491	0.99997
GO:0007600	sensory perception	130	14	14.3	0.57678	0.99997
GO:0019058	viral life cycle	74	8	8.14	0.57680	0.99997
GO:0030595	leukocyte chemotaxis	74	8	8.14	0.57680	0.99997
GO:0071363	cellular response to growth factor stimu...	195	21	21.45	0.57742	0.99997
GO:0006753	nucleoside phosphate metabolic process	158	17	17.38	0.57824	0.99997
GO:0050865	regulation of cell activation	158	17	17.38	0.57824	0.99997
GO:0002700	regulation of production of molecular me...	46	5	5.06	0.58162	0.99997
GO:0009199	ribonucleoside triphosphate metabolic pr...	46	5	5.06	0.58162	0.99997
GO:0060041	retina development in camera-type eye	46	5	5.06	0.58162	0.99997
GO:0032868	response to insulin	65	7	7.15	0.58337	0.99997
GO:0007569	cell aging	27	3	2.97	0.58350	0.99997
GO:0010921	regulation of phosphatase activity	27	3	2.97	0.58350	0.99997
GO:0015918	sterol transport	27	3	2.97	0.58350	0.99997
GO:0030301	cholesterol transport	27	3	2.97	0.58350	0.99997
GO:0042116	macrophage activation	27	3	2.97	0.58350	0.99997
GO:0042303	molting cycle	27	3	2.97	0.58350	0.99997
GO:0042633	hair cycle	27	3	2.97	0.58350	0.99997
GO:0044409	entry into host	27	3	2.97	0.58350	0.99997
GO:0045089	positive regulation of innate immune res...	27	3	2.97	0.58350	0.99997
GO:0046330	positive regulation of JNK cascade	27	3	2.97	0.58350	0.99997
GO:0050671	positive regulation of lymphocyte prolif...	27	3	2.97	0.58350	0.99997
GO:0071230	cellular response to amino acid stimulus	27	3	2.97	0.58350	0.99997
GO:0071426	ribonucleoprotein complex export from nu...	27	3	2.97	0.58350	0.99997
GO:1901989	positive regulation of cell cycle phase ...	27	3	2.97	0.58350	0.99997
GO:0006914	autophagy	112	12	12.32	0.58485	0.99997
GO:0061919	process utilizing autophagic mechanism	112	12	12.32	0.58485	0.99997
GO:0051276	chromosome organization	270	29	29.7	0.58651	0.99997
GO:0001817	regulation of cytokine production	196	21	21.56	0.58737	0.99997
GO:0022402	cell cycle process	326	35	35.86	0.59106	0.99997
GO:0009141	nucleoside triphosphate metabolic proces...	56	6	6.16	0.59136	0.99997
GO:0035264	multicellular organism growth	56	6	6.16	0.59136	0.99997
GO:0051348	negative regulation of transferase activ...	75	8	8.25	0.59261	0.99997
GO:0007292	female gamete generation	37	4	4.07	0.59290	0.99997
GO:0010257	NADH dehydrogenase complex assembly	37	4	4.07	0.59290	0.99997
GO:0032981	mitochondrial respiratory chain complex ...	37	4	4.07	0.59290	0.99997
GO:0043502	regulation of muscle adaptation	37	4	4.07	0.59290	0.99997
GO:0046939	nucleotide phosphorylation	37	4	4.07	0.59290	0.99997
GO:2001057	reactive nitrogen species metabolic proc...	37	4	4.07	0.59290	0.99997
GO:0050900	leukocyte migration	122	13	13.42	0.59307	0.99997
GO:0043067	regulation of programmed cell death	437	47	48.07	0.59340	0.99997
GO:2000147	positive regulation of cell motility	206	22	22.66	0.59435	0.99997
GO:0006260	DNA replication	94	10	10.34	0.59493	0.99997
GO:0048193	Golgi vesicle transport	94	10	10.34	0.59493	0.99997
GO:0060326	cell chemotaxis	94	10	10.34	0.59493	0.99997
GO:0000122	negative regulation of transcription by ...	225	24	24.75	0.59831	0.99997
GO:0006468	protein phosphorylation	447	48	49.17	0.59871	0.99997
GO:0042113	B cell activation	66	7	7.26	0.60011	0.99997
GO:0090150	establishment of protein localization to...	85	9	9.35	0.60104	0.99997
GO:0001816	cytokine production	216	23	23.76	0.60105	0.99997
GO:0030218	erythrocyte differentiation	47	5	5.17	0.60140	0.99997
GO:0042742	defense response to bacterium	47	5	5.17	0.60140	0.99997
GO:1990542	mitochondrial transmembrane transport	47	5	5.17	0.60140	0.99997
GO:0042981	regulation of apoptotic process	429	46	47.19	0.60173	0.99997
GO:0006629	lipid metabolic process	383	41	42.13	0.60286	0.99997
GO:0009725	response to hormone	179	19	19.69	0.60359	0.99997
GO:0040017	positive regulation of locomotion	207	22	22.77	0.60394	0.99997
GO:0001910	regulation of leukocyte mediated cytotox...	18	2	1.98	0.60466	0.99997
GO:0006414	translational elongation	18	2	1.98	0.60466	0.99997
GO:0006879	cellular iron ion homeostasis	18	2	1.98	0.60466	0.99997
GO:0014009	glial cell proliferation	18	2	1.98	0.60466	0.99997
GO:0014855	striated muscle cell proliferation	18	2	1.98	0.60466	0.99997
GO:0014911	positive regulation of smooth muscle cel...	18	2	1.98	0.60466	0.99997
GO:0017156	calcium-ion regulated exocytosis	18	2	1.98	0.60466	0.99997
GO:0035909	aorta morphogenesis	18	2	1.98	0.60466	0.99997
GO:0043113	receptor clustering	18	2	1.98	0.60466	0.99997
GO:0045429	positive regulation of nitric oxide bios...	18	2	1.98	0.60466	0.99997
GO:0046626	regulation of insulin receptor signaling...	18	2	1.98	0.60466	0.99997
GO:0048168	regulation of neuronal synaptic plastici...	18	2	1.98	0.60466	0.99997
GO:0051966	regulation of synaptic transmission, glu...	18	2	1.98	0.60466	0.99997
GO:0060042	retina morphogenesis in camera-type eye	18	2	1.98	0.60466	0.99997
GO:0060078	regulation of postsynaptic membrane pote...	18	2	1.98	0.60466	0.99997
GO:0060113	inner ear receptor cell differentiation	18	2	1.98	0.60466	0.99997
GO:0062237	protein localization to postsynapse	18	2	1.98	0.60466	0.99997
GO:0070613	regulation of protein processing	18	2	1.98	0.60466	0.99997
GO:0072523	purine-containing compound catabolic pro...	18	2	1.98	0.60466	0.99997
GO:0072678	T cell migration	18	2	1.98	0.60466	0.99997
GO:0090049	regulation of cell migration involved in...	18	2	1.98	0.60466	0.99997
GO:1903427	negative regulation of reactive oxygen s...	18	2	1.98	0.60466	0.99997
GO:1904888	cranial skeletal system development	18	2	1.98	0.60466	0.99997
GO:0055080	cation homeostasis	226	24	24.86	0.60748	0.99997
GO:0042327	positive regulation of phosphorylation	254	27	27.94	0.60833	0.99997
GO:0000187	activation of MAPK activity	28	3	3.08	0.60894	0.99997
GO:0006112	energy reserve metabolic process	28	3	3.08	0.60894	0.99997
GO:0015844	monoamine transport	28	3	3.08	0.60894	0.99997
GO:0016579	protein deubiquitination	28	3	3.08	0.60894	0.99997
GO:0032946	positive regulation of mononuclear cell ...	28	3	3.08	0.60894	0.99997
GO:0048525	negative regulation of viral process	28	3	3.08	0.60894	0.99997
GO:0065004	protein-DNA complex assembly	28	3	3.08	0.60894	0.99997
GO:0071166	ribonucleoprotein complex localization	28	3	3.08	0.60894	0.99997
GO:0098773	skin epidermis development	28	3	3.08	0.60894	0.99997
GO:0010562	positive regulation of phosphorus metabo...	273	29	30.03	0.61182	0.99997
GO:0045937	positive regulation of phosphate metabol...	273	29	30.03	0.61182	0.99997
GO:1901700	response to oxygen-containing compound	412	44	45.32	0.61184	0.99997
GO:0071407	cellular response to organic cyclic comp...	133	14	14.63	0.61255	0.99997
GO:0001885	endothelial cell development	38	4	4.18	0.61462	0.99997
GO:0009145	purine nucleoside triphosphate biosynthe...	38	4	4.18	0.61462	0.99997
GO:0009206	purine ribonucleoside triphosphate biosy...	38	4	4.18	0.61462	0.99997
GO:1901657	glycosyl compound metabolic process	38	4	4.18	0.61462	0.99997
GO:0009615	response to virus	86	9	9.46	0.61555	0.99997
GO:0034599	cellular response to oxidative stress	86	9	9.46	0.61555	0.99997
GO:0051604	protein maturation	86	9	9.46	0.61555	0.99997
GO:1901214	regulation of neuron death	105	11	11.55	0.61612	0.99997
GO:0008544	epidermis development	67	7	7.37	0.61650	0.99997
GO:0010594	regulation of endothelial cell migration	67	7	7.37	0.61650	0.99997
GO:0015931	nucleobase-containing compound transport	67	7	7.37	0.61650	0.99997
GO:0070848	response to growth factor	199	21	21.89	0.61669	0.99997
GO:0045860	positive regulation of protein kinase ac...	124	13	13.64	0.61750	0.99997
GO:0072521	purine-containing compound metabolic pro...	143	15	15.73	0.61935	0.99997
GO:0002285	lymphocyte activation involved in immune...	48	5	5.28	0.62064	0.99997
GO:0002819	regulation of adaptive immune response	48	5	5.28	0.62064	0.99997
GO:0061136	regulation of proteasomal protein catabo...	48	5	5.28	0.62064	0.99997
GO:1901991	negative regulation of mitotic cell cycl...	48	5	5.28	0.62064	0.99997
GO:0007049	cell cycle	469	50	51.59	0.62205	0.99997
GO:0042326	negative regulation of phosphorylation	115	12	12.65	0.62296	0.99997
GO:0001501	skeletal system development	134	14	14.74	0.62416	0.99997
GO:0009611	response to wounding	153	16	16.83	0.62581	0.99997
GO:0031329	regulation of cellular catabolic process	200	21	22	0.62625	0.99997
GO:0006261	DNA-dependent DNA replication	58	6	6.38	0.62664	0.99997
GO:0006469	negative regulation of protein kinase ac...	58	6	6.38	0.62664	0.99997
GO:0006486	protein glycosylation	58	6	6.38	0.62664	0.99997
GO:0043413	macromolecule glycosylation	58	6	6.38	0.62664	0.99997
GO:0043534	blood vessel endothelial cell migration	58	6	6.38	0.62664	0.99997
GO:0070374	positive regulation of ERK1 and ERK2 cas...	58	6	6.38	0.62664	0.99997
GO:0010564	regulation of cell cycle process	172	18	18.92	0.62775	0.99997
GO:0051656	establishment of organelle localization	106	11	11.66	0.62906	0.99997
GO:1903532	positive regulation of secretion by cell	87	9	9.57	0.62979	0.99997
GO:0033993	response to lipid	191	20	21.01	0.62988	0.99997
GO:0048585	negative regulation of response to stimu...	461	49	50.71	0.63015	0.99997
GO:0033673	negative regulation of kinase activity	68	7	7.48	0.63252	0.99997
GO:0098813	nuclear chromosome segregation	68	7	7.48	0.63252	0.99997
GO:0006096	glycolytic process	29	3	3.19	0.63332	0.99997
GO:0006405	RNA export from nucleus	29	3	3.19	0.63332	0.99997
GO:0006757	ATP generation from ADP	29	3	3.19	0.63332	0.99997
GO:0010611	regulation of cardiac muscle hypertrophy	29	3	3.19	0.63332	0.99997
GO:0010717	regulation of epithelial to mesenchymal ...	29	3	3.19	0.63332	0.99997
GO:0015698	inorganic anion transport	29	3	3.19	0.63332	0.99997
GO:0034644	cellular response to UV	29	3	3.19	0.63332	0.99997
GO:0042476	odontogenesis	29	3	3.19	0.63332	0.99997
GO:1901224	positive regulation of NIK/NF-kappaB sig...	29	3	3.19	0.63332	0.99997
GO:0044255	cellular lipid metabolic process	285	30	31.35	0.63379	0.99997
GO:0098771	inorganic ion homeostasis	229	24	25.19	0.63448	0.99997
GO:0002709	regulation of T cell mediated immunity	19	2	2.09	0.63476	0.99997
GO:0007631	feeding behavior	19	2	2.09	0.63476	0.99997
GO:0021954	central nervous system neuron developmen...	19	2	2.09	0.63476	0.99997
GO:0032964	collagen biosynthetic process	19	2	2.09	0.63476	0.99997
GO:0045005	DNA-dependent DNA replication maintenanc...	19	2	2.09	0.63476	0.99997
GO:0045824	negative regulation of innate immune res...	19	2	2.09	0.63476	0.99997
GO:0046676	negative regulation of insulin secretion	19	2	2.09	0.63476	0.99997
GO:0048483	autonomic nervous system development	19	2	2.09	0.63476	0.99997
GO:0060395	SMAD protein signal transduction	19	2	2.09	0.63476	0.99997
GO:0061614	pri-miRNA transcription by RNA polymeras...	19	2	2.09	0.63476	0.99997
GO:0070059	intrinsic apoptotic signaling pathway in...	19	2	2.09	0.63476	0.99997
GO:0097120	receptor localization to synapse	19	2	2.09	0.63476	0.99997
GO:1902003	regulation of amyloid-beta formation	19	2	2.09	0.63476	0.99997
GO:1904407	positive regulation of nitric oxide meta...	19	2	2.09	0.63476	0.99997
GO:2000134	negative regulation of G1/S transition o...	19	2	2.09	0.63476	0.99997
GO:0001570	vasculogenesis	39	4	4.29	0.63562	0.99997
GO:0009201	ribonucleoside triphosphate biosynthetic...	39	4	4.29	0.63562	0.99997
GO:0009913	epidermal cell differentiation	39	4	4.29	0.63562	0.99997
GO:0046661	male sex differentiation	39	4	4.29	0.63562	0.99997
GO:0050728	negative regulation of inflammatory resp...	39	4	4.29	0.63562	0.99997
GO:0060840	artery development	39	4	4.29	0.63562	0.99997
GO:0030335	positive regulation of cell migration	201	21	22.11	0.63571	0.99997
GO:0043161	proteasome-mediated ubiquitin-dependent ...	97	10	10.67	0.63593	0.99997
GO:0050878	regulation of body fluid levels	97	10	10.67	0.63593	0.99997
GO:0016567	protein ubiquitination	154	16	16.94	0.63654	0.99997
GO:0000278	mitotic cell cycle	248	26	27.28	0.63688	0.99997
GO:0000165	MAPK cascade	220	23	24.2	0.63781	0.99997
GO:0051129	negative regulation of cellular componen...	220	23	24.2	0.63781	0.99997
GO:0009144	purine nucleoside triphosphate metabolic...	49	5	5.39	0.63932	0.99997
GO:0046649	lymphocyte activation	192	20	21.12	0.63951	0.99997
GO:0009150	purine ribonucleotide metabolic process	126	13	13.86	0.64120	0.99997
[truncated: 1,582 more rows]

## Sheet: cl4
GO.ID	Term	Annotated	Significant	Expected	classicFisher	BH
[truncated: 3,081 more rows]

[truncated: 3 more sheets: cl5, cl6, cl7]
