# Supplementary figures and images for: Inter-tissue convergence of gene expression during ageing suggests age-related loss of tissue and cellular identity
Source: eLife journal article supplement (doi:10.7554/elife.68048), 2022-01-31

Development | Ageing

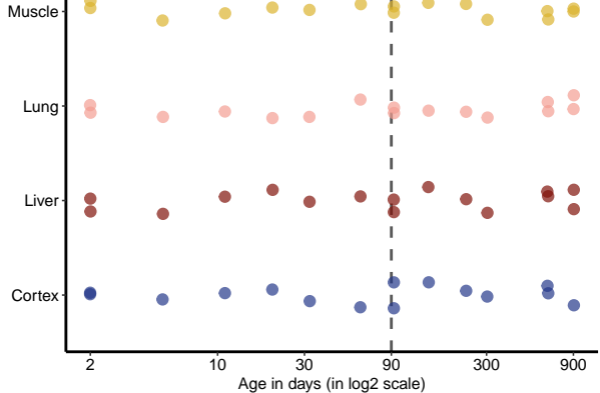

Supplement: supp [file elife-68048-supp-v1.zip › elife_poa_e68048_Figure_1_figure_supplement_1.pdf]

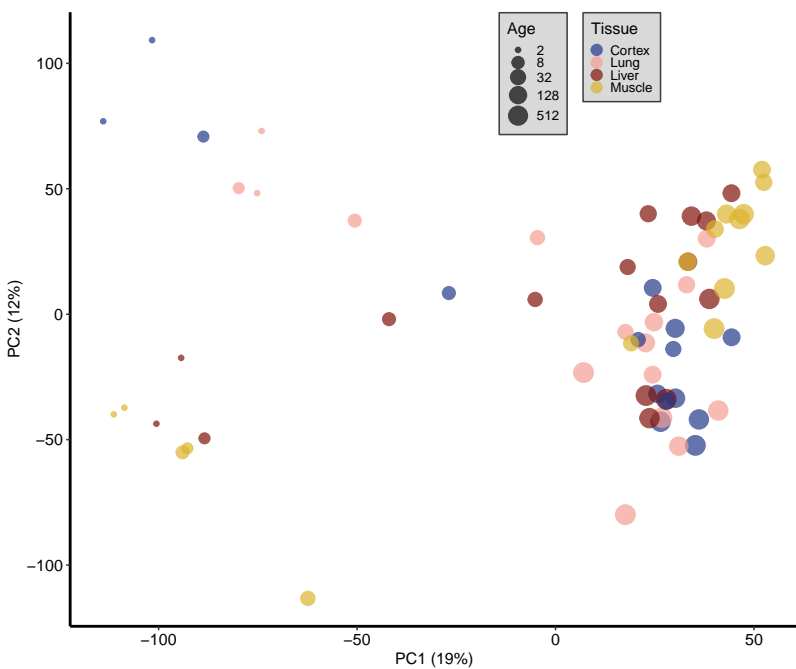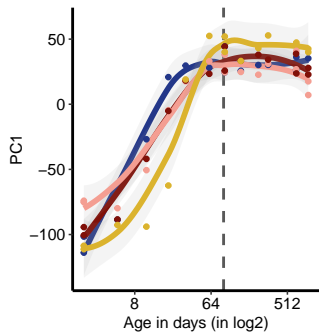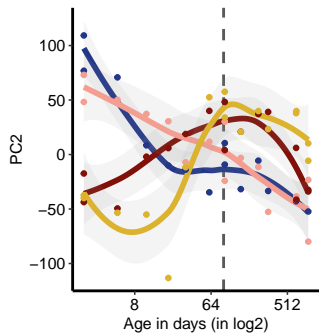

Supplement: supp [file elife-68048-supp-v1.zip › elife_poa_e68048_Figure_1_figure_supplement_2.pdf]

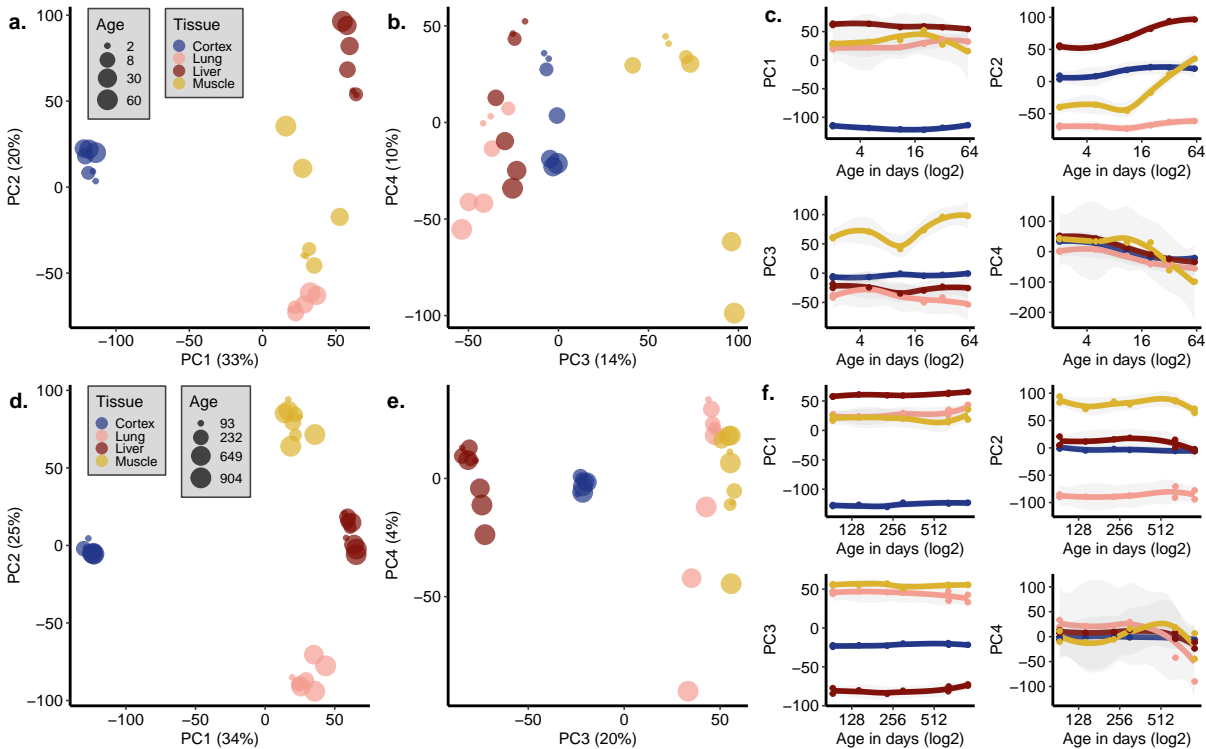

Supplement: supp [file elife-68048-supp-v1.zip › elife_poa_e68048_Figure_1_figure_supplement_3.pdf]

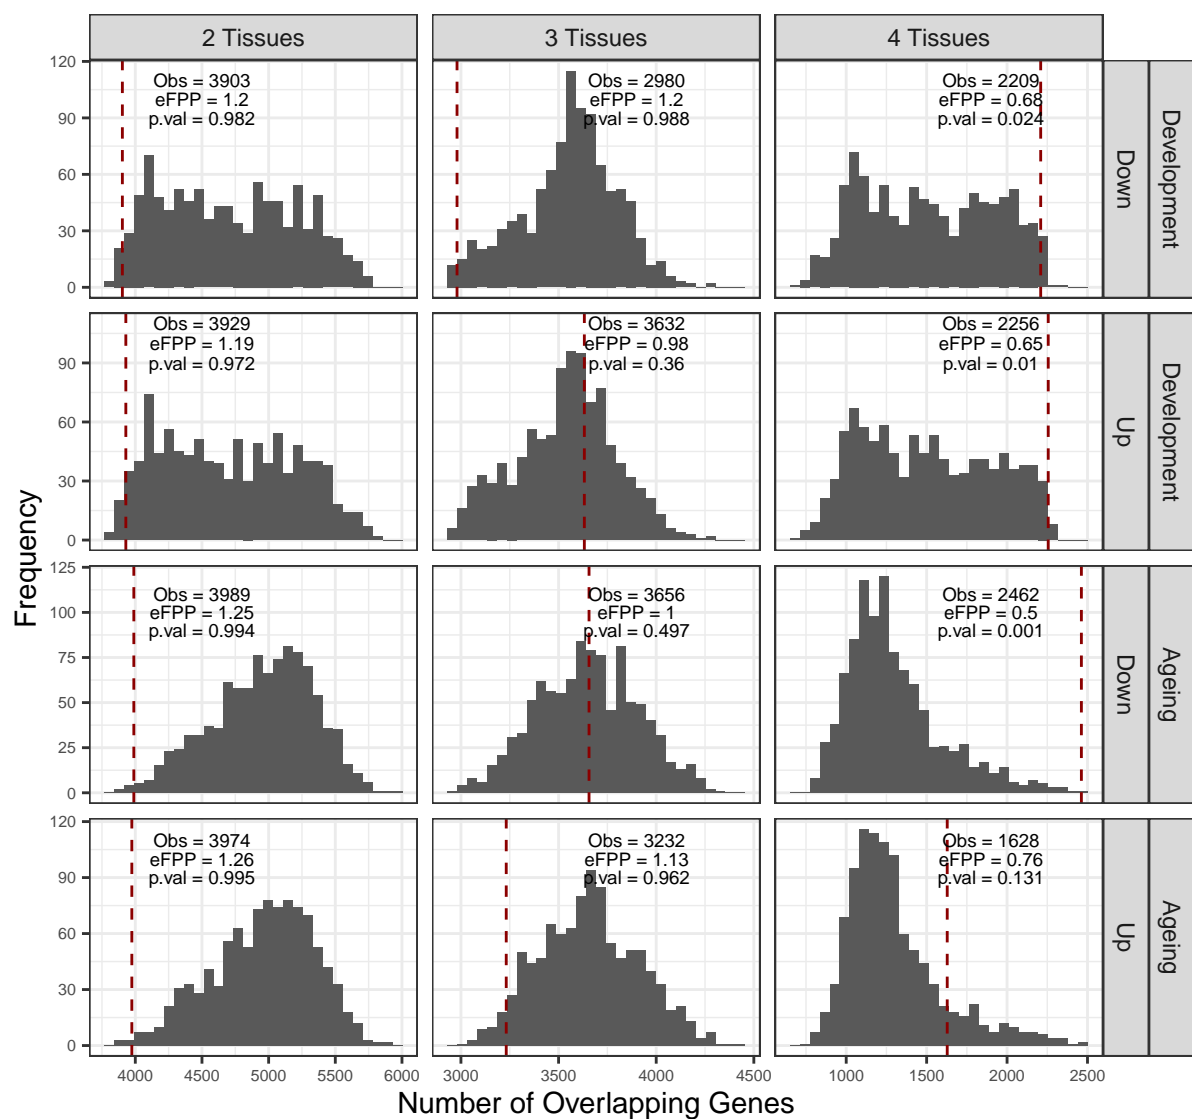

Supplement: supp [file elife-68048-supp-v1.zip › elife_poa_e68048_Figure_1_figure_supplement_4.pdf]

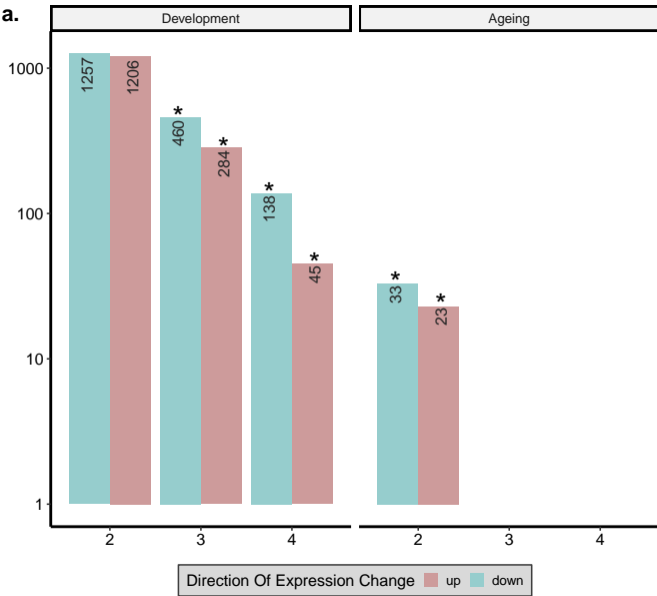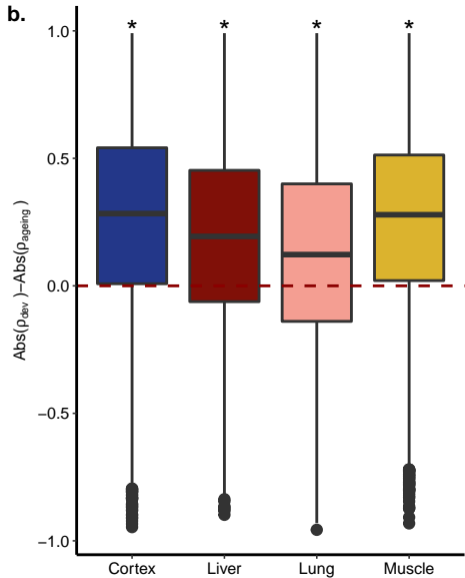

Supplement: supp [file elife-68048-supp-v1.zip › elife_poa_e68048_Figure_1_figure_supplement_5.pdf]

a.

Frequency

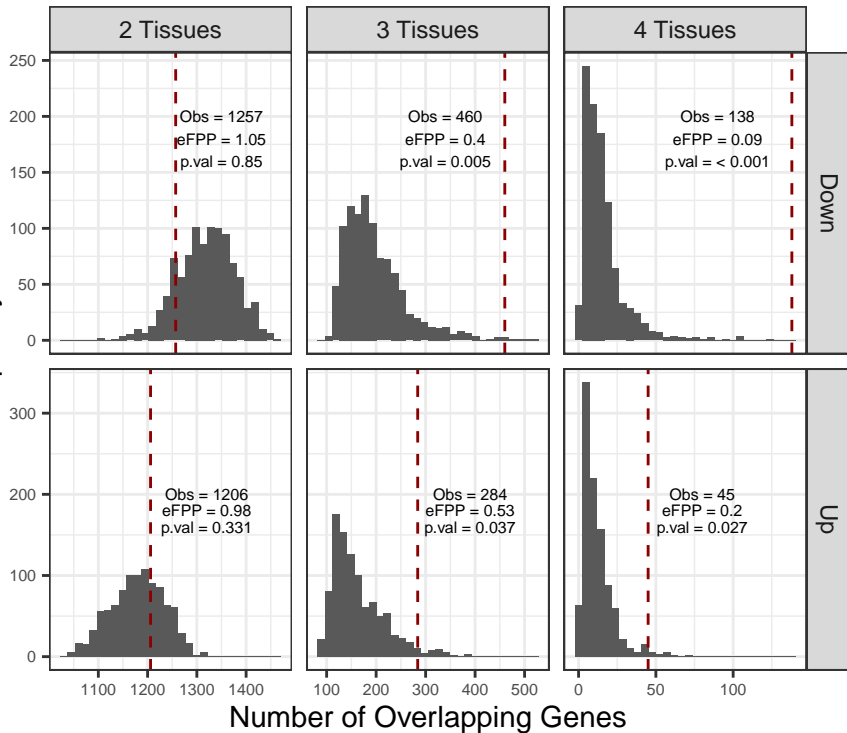

b.

Frequency

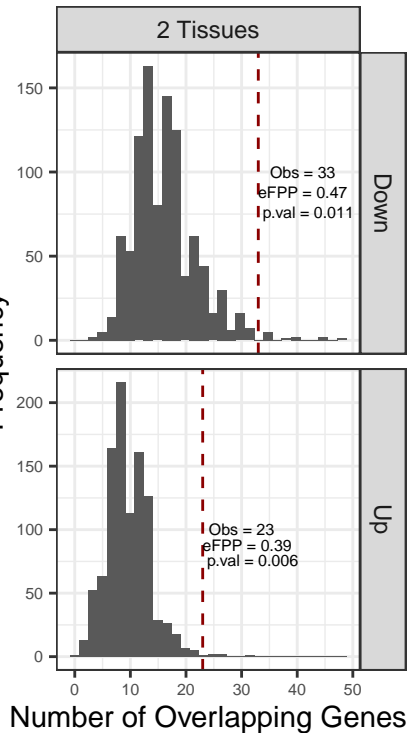

Supplement: supp [file elife-68048-supp-v1.zip › elife_poa_e68048_Figure_1_figure_supplement_6.pdf]

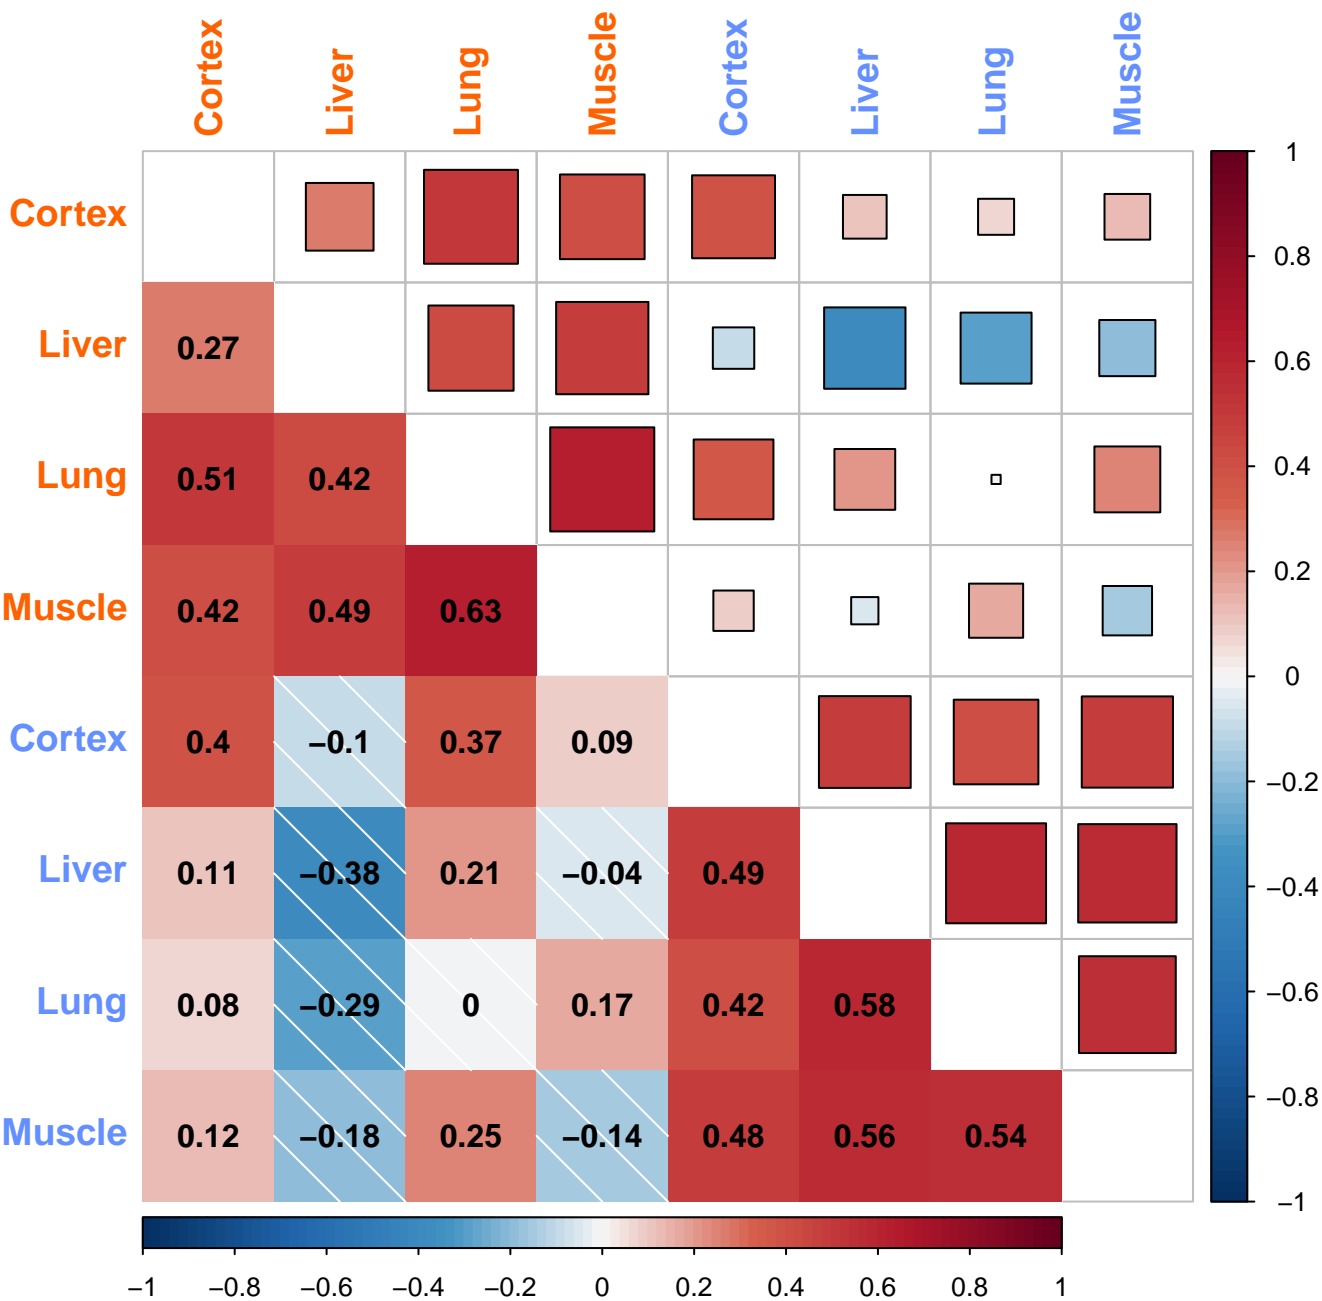

Supplement: supp [file elife-68048-supp-v1.zip › elife_poa_e68048_Figure_1_figure_supplement_7.pdf]

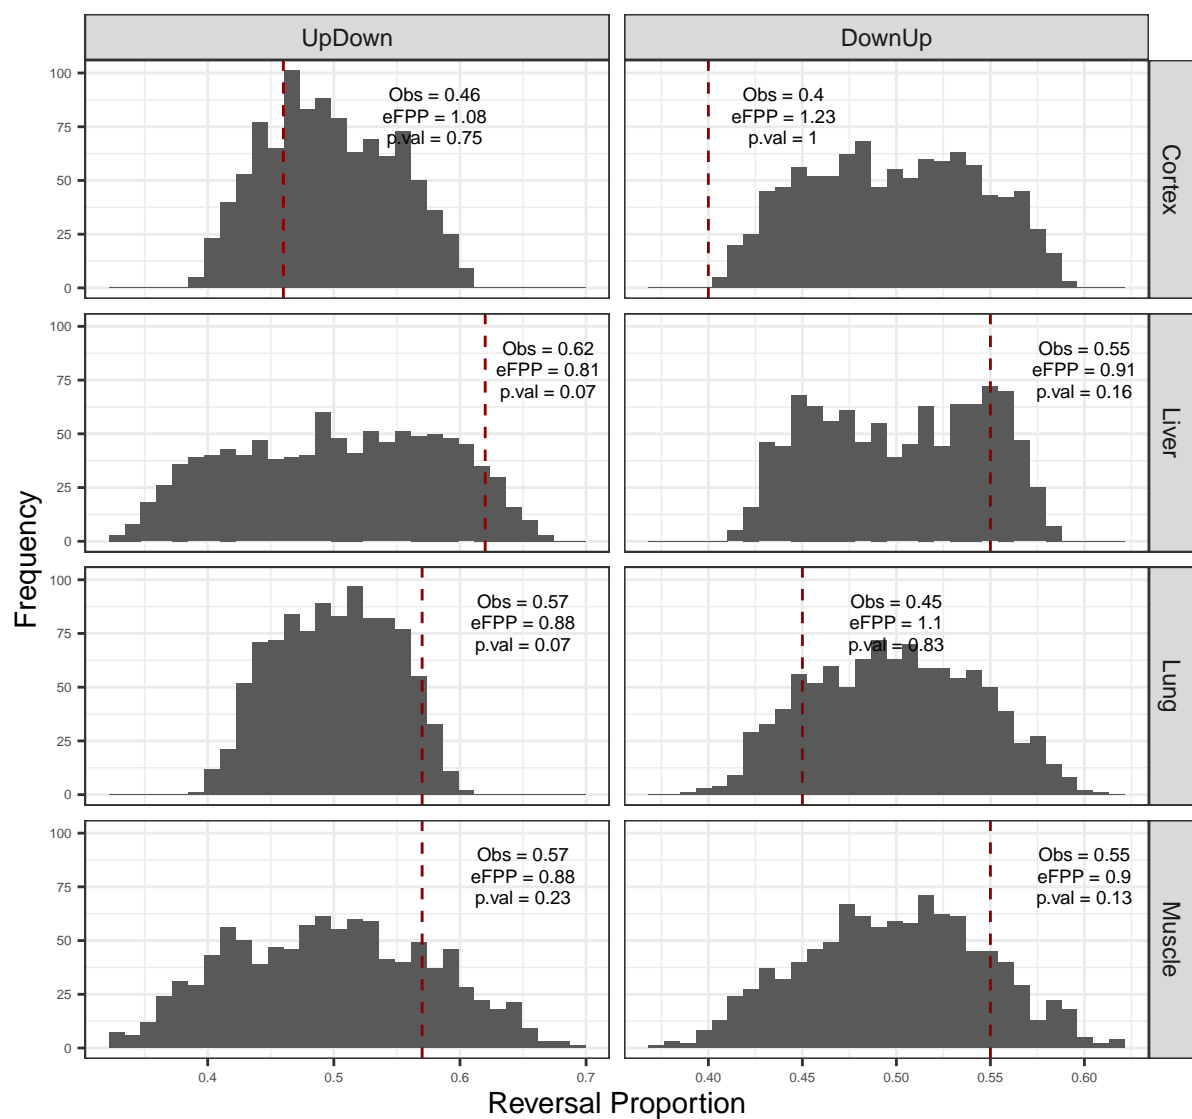

Supplement: supp [file elife-68048-supp-v1.zip › elife_poa_e68048_Figure_1_figure_supplement_8.pdf]

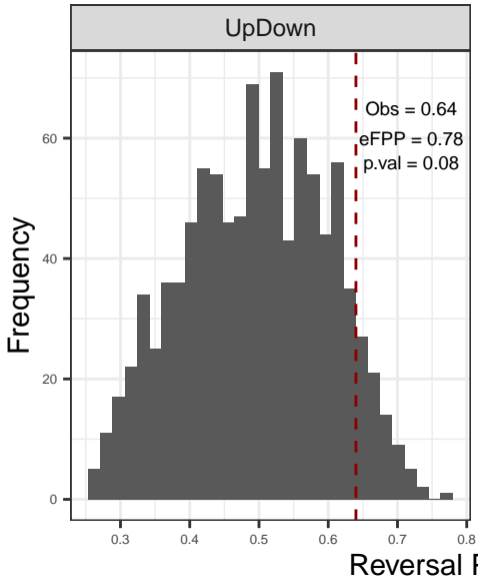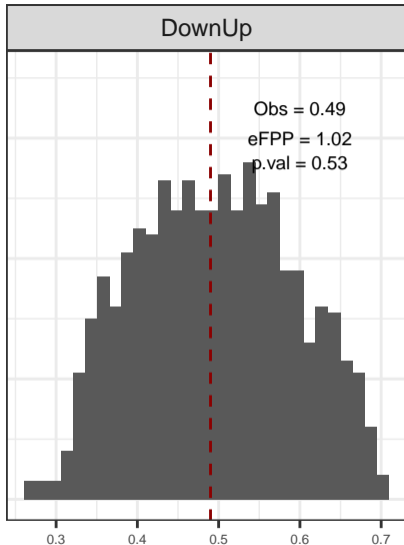

Supplement: supp [file elife-68048-supp-v1.zip › elife_poa_e68048_Figure_1_figure_supplement_9.pdf]

**a.**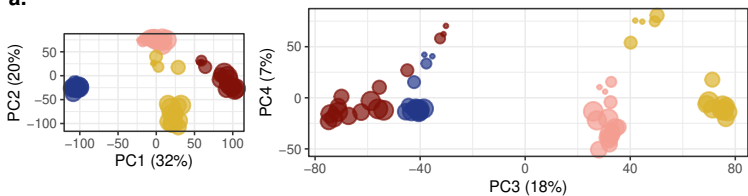**b.**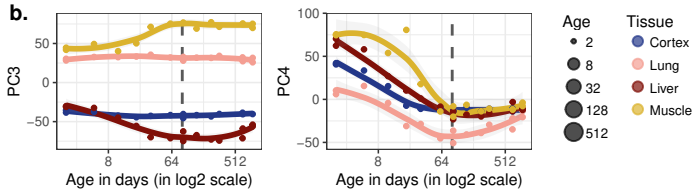**c.**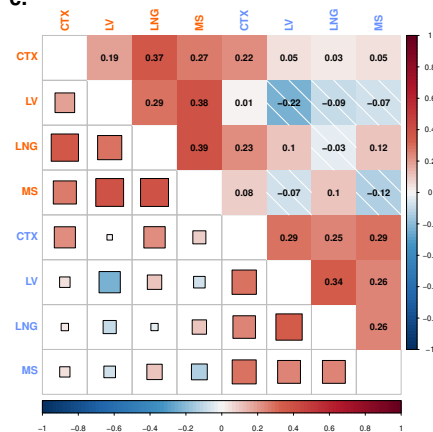**d.**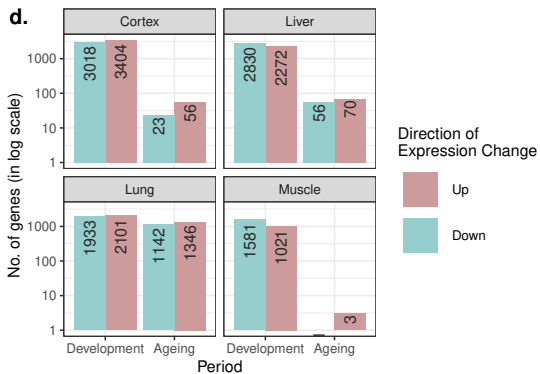**e.**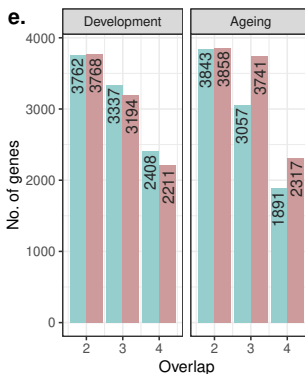**f.**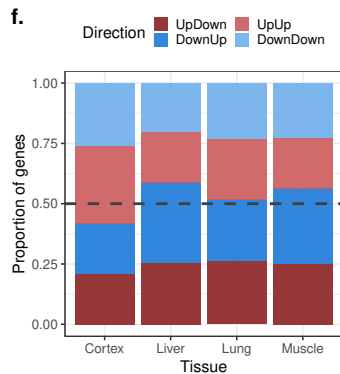

Supplement: supp [file elife-68048-supp-v1.zip › elife_poa_e68048_Figure_1_figure_supplement_10.pdf]

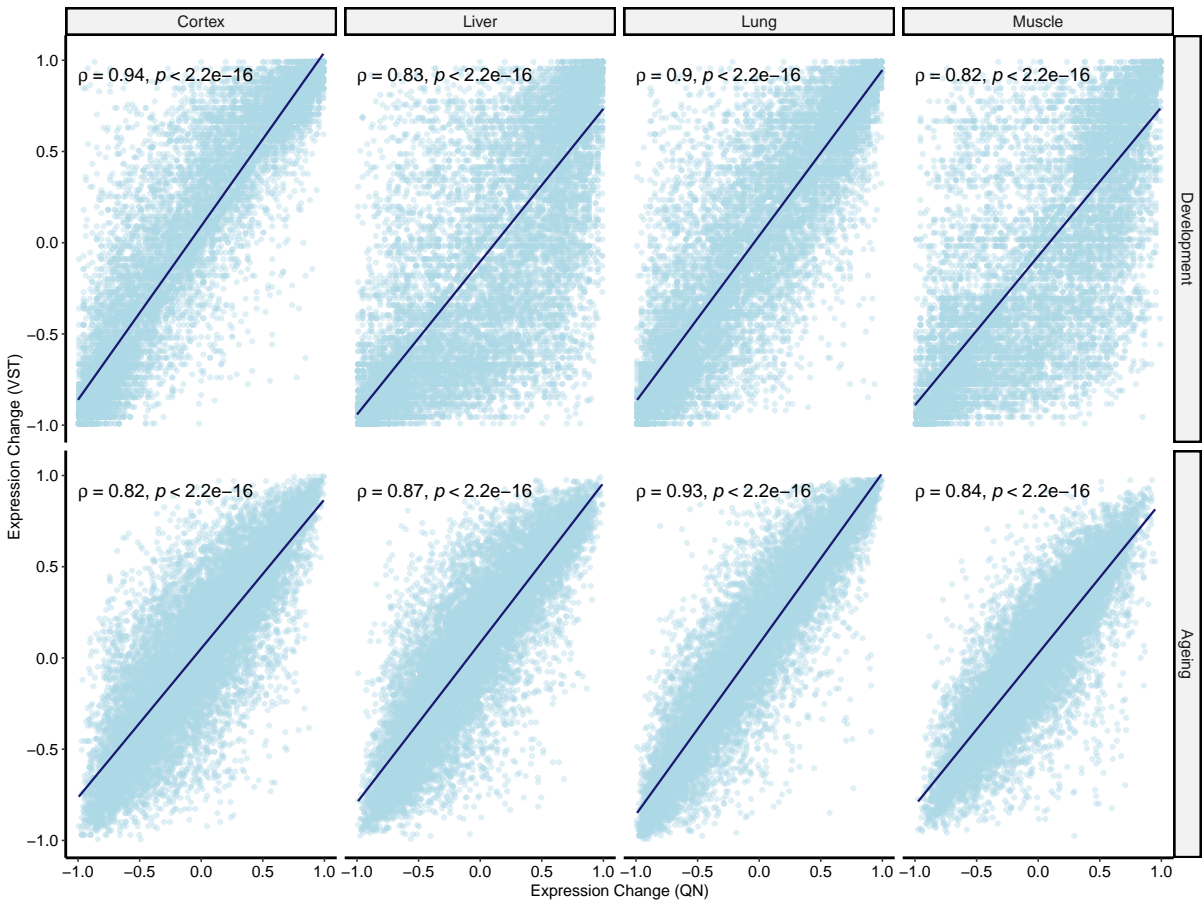

Supplement: supp [file elife-68048-supp-v1.zip › elife_poa_e68048_Figure_1_figure_supplement_11.pdf]

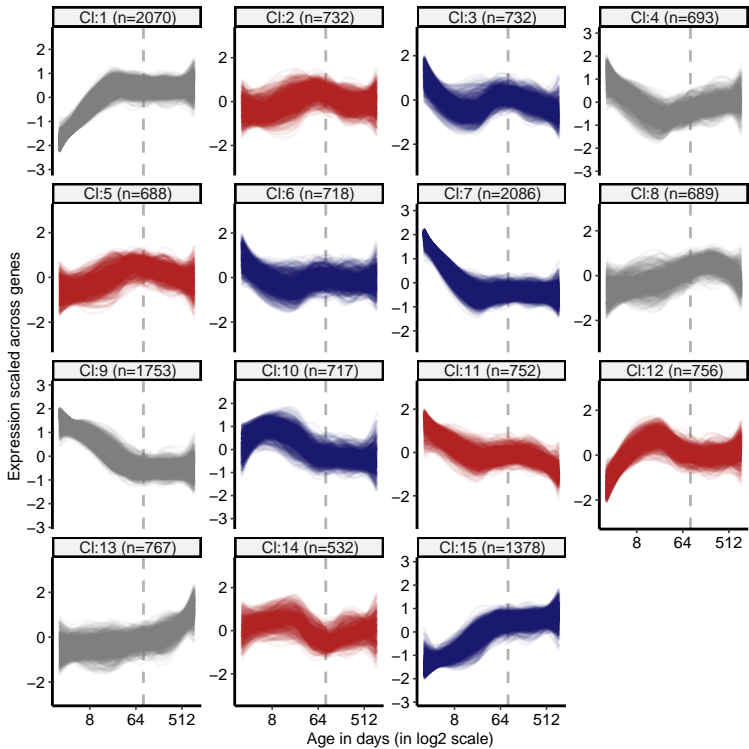

Supplement: supp [file elife-68048-supp-v1.zip › elife_poa_e68048_Figure_1_figure_supplement_12.pdf]

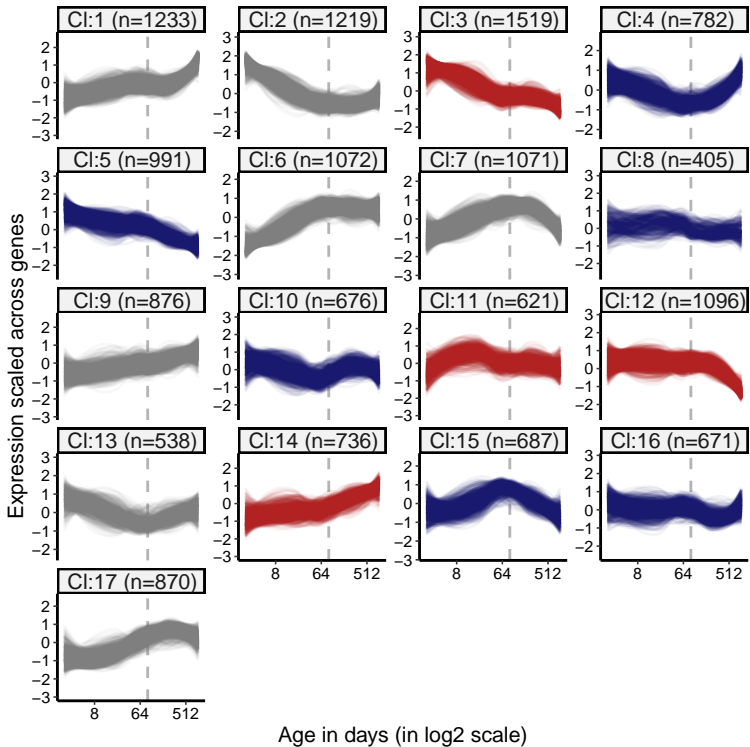

Supplement: supp [file elife-68048-supp-v1.zip › elife_poa_e68048_Figure_1_figure_supplement_13.pdf]

Expression scaled across genes

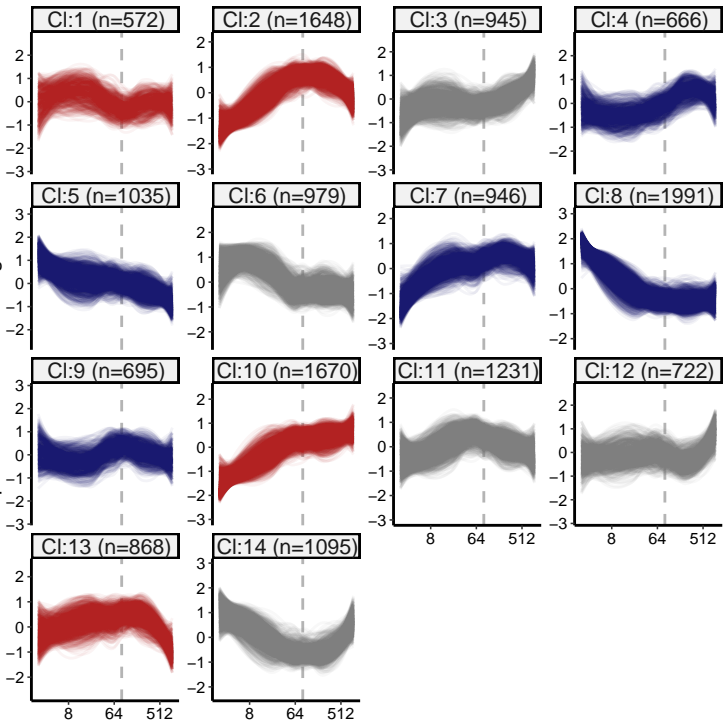

Age in days (in log2 scale)

Supplement: supp [file elife-68048-supp-v1.zip › elife_poa_e68048_Figure_1_figure_supplement_14.pdf]

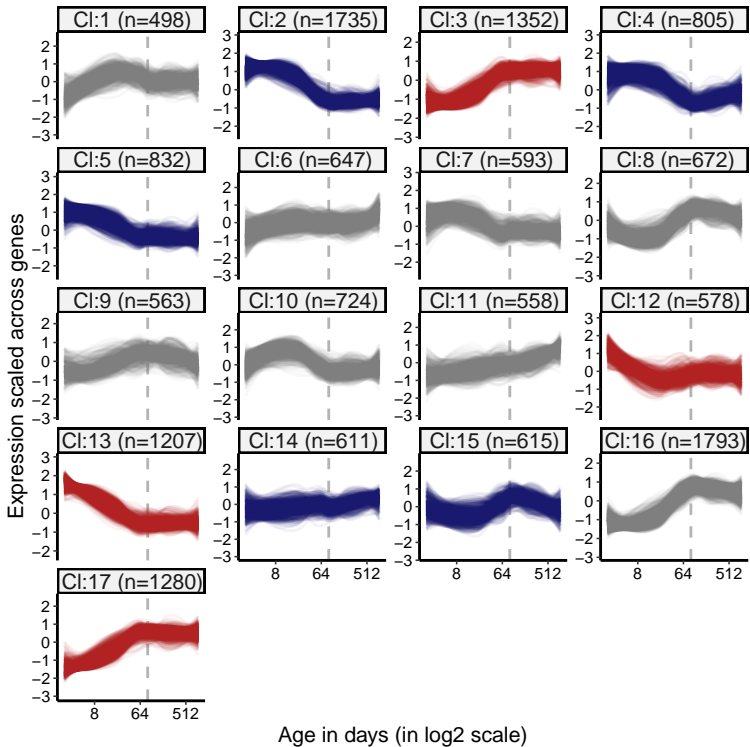

Supplement: supp [file elife-68048-supp-v1.zip › elife_poa_e68048_Figure_1_figure_supplement_15.pdf]

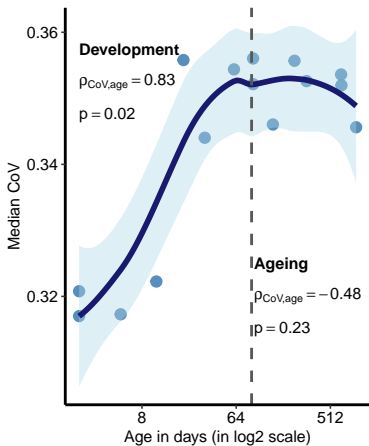

Supplement: supp [file elife-68048-supp-v1.zip › elife_poa_e68048_Figure_2_figure_supplement_1.pdf]

CoV scaled across genes

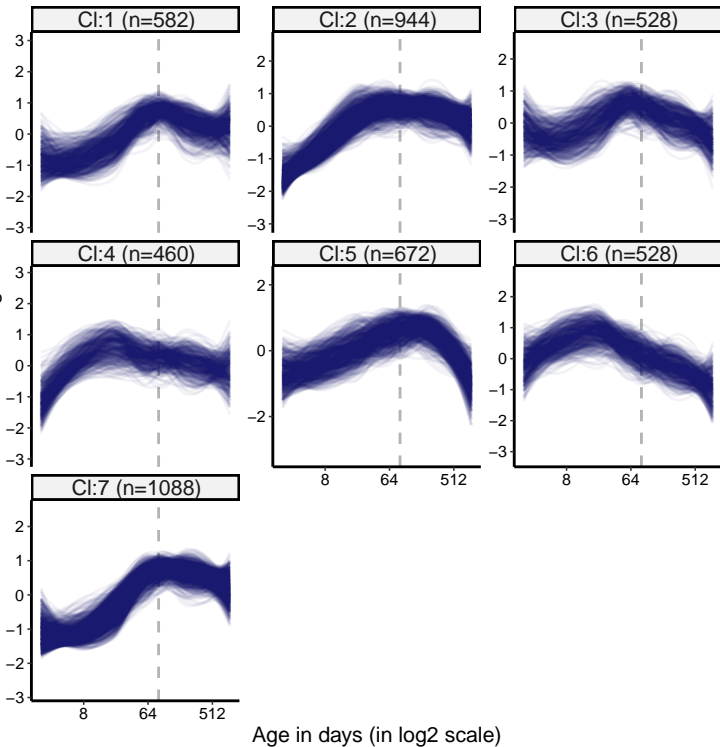

Supplement: supp [file elife-68048-supp-v1.zip › elife_poa_e68048_Figure_2_figure_supplement_2.pdf]

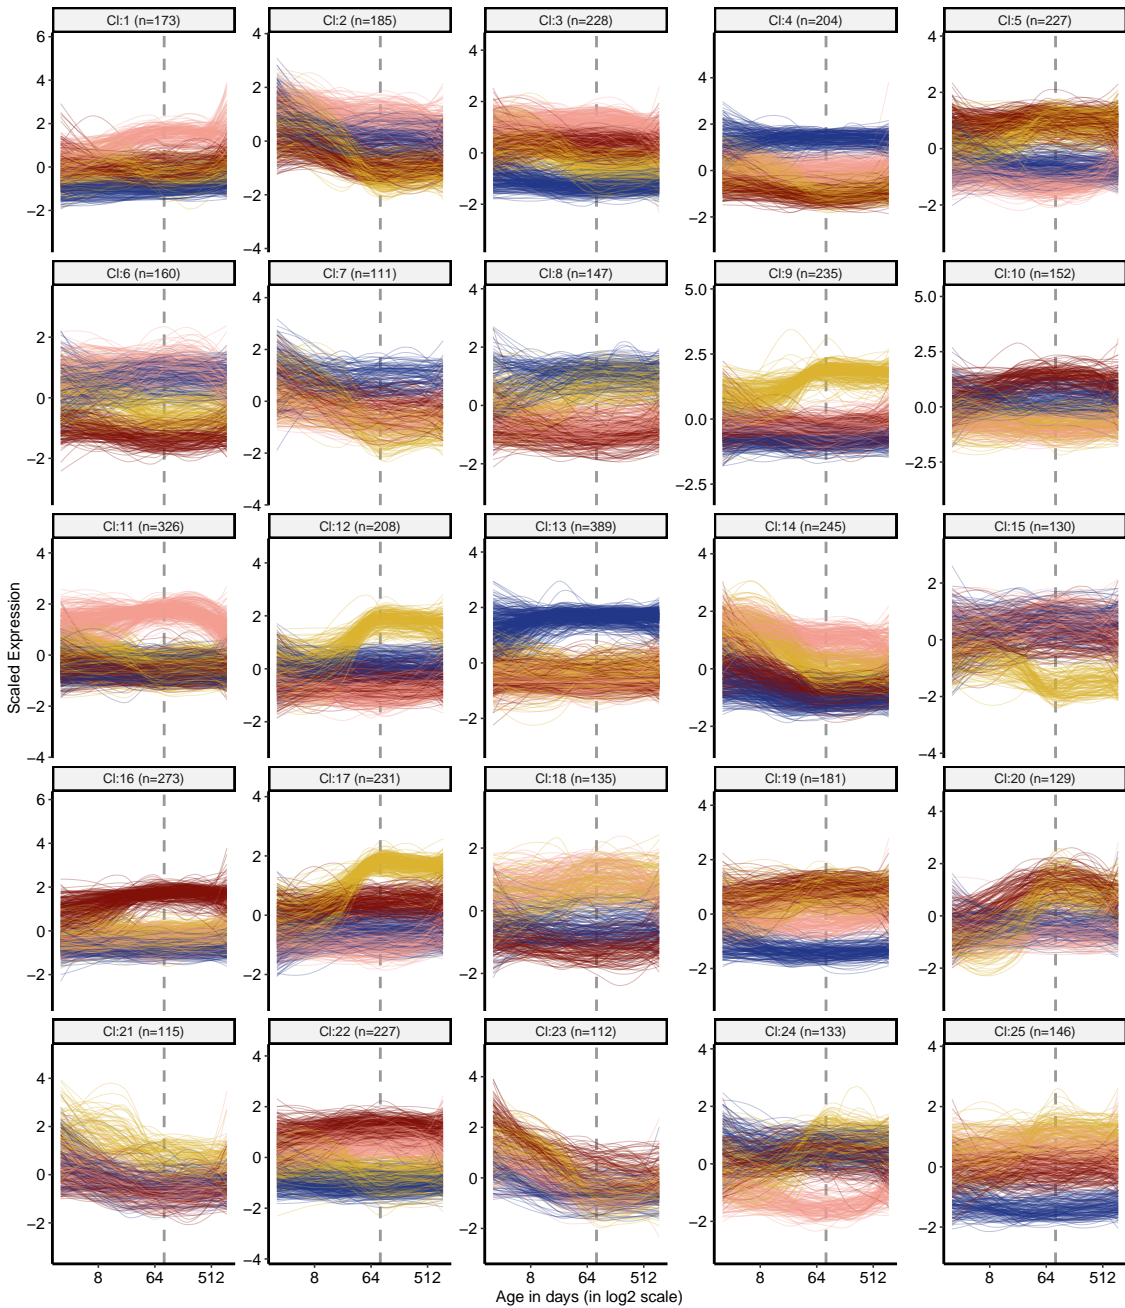

Supplement: supp [file elife-68048-supp-v1.zip › elife_poa_e68048_Figure_2_figure_supplement_3.pdf]

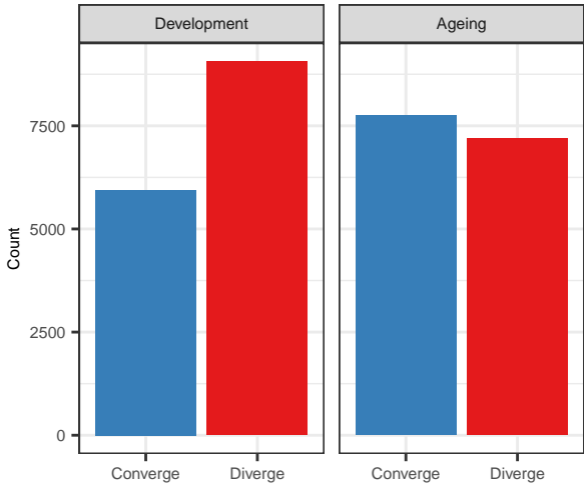

Supplement: supp [file elife-68048-supp-v1.zip › elife_poa_e68048_Figure_2_figure_supplement_4.pdf]

CORTEX-LIVER

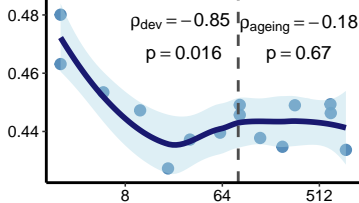

CORTEX-LUNG

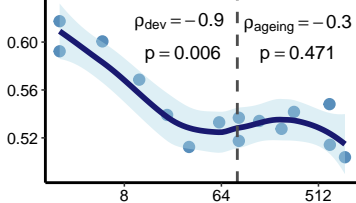

CORTEX-MUSCLE

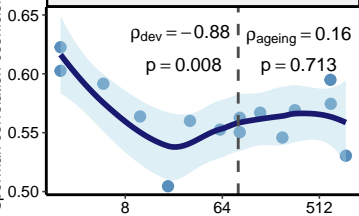

LIVER-MUSCLE

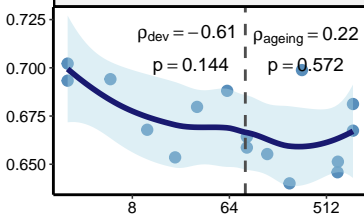

LUNG-LIVER

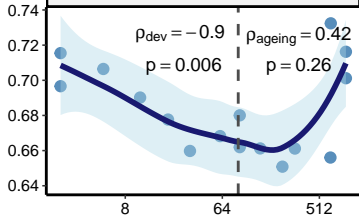

LUNG-MUSCLE

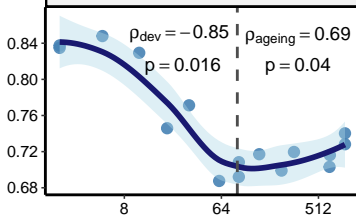

Supplement: supp [file elife-68048-supp-v1.zip › elife_poa_e68048_Figure_2_figure_supplement_5.pdf]

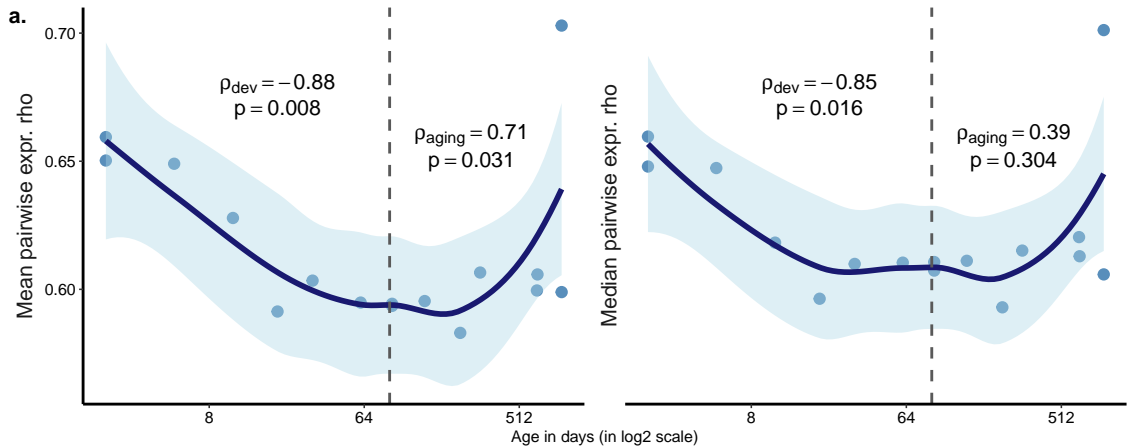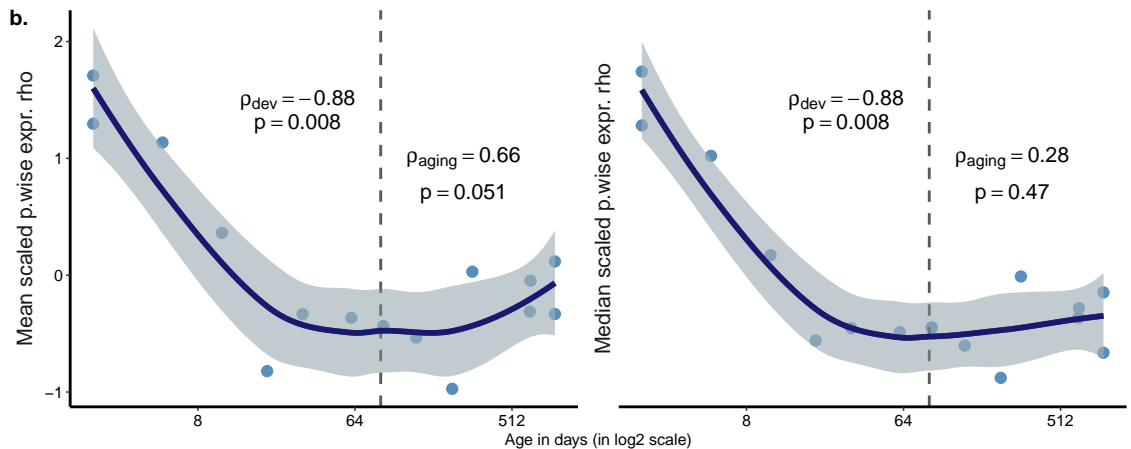

Supplement: supp [file elife-68048-supp-v1.zip › elife_poa_e68048_Figure_2_figure_supplement_6.pdf]

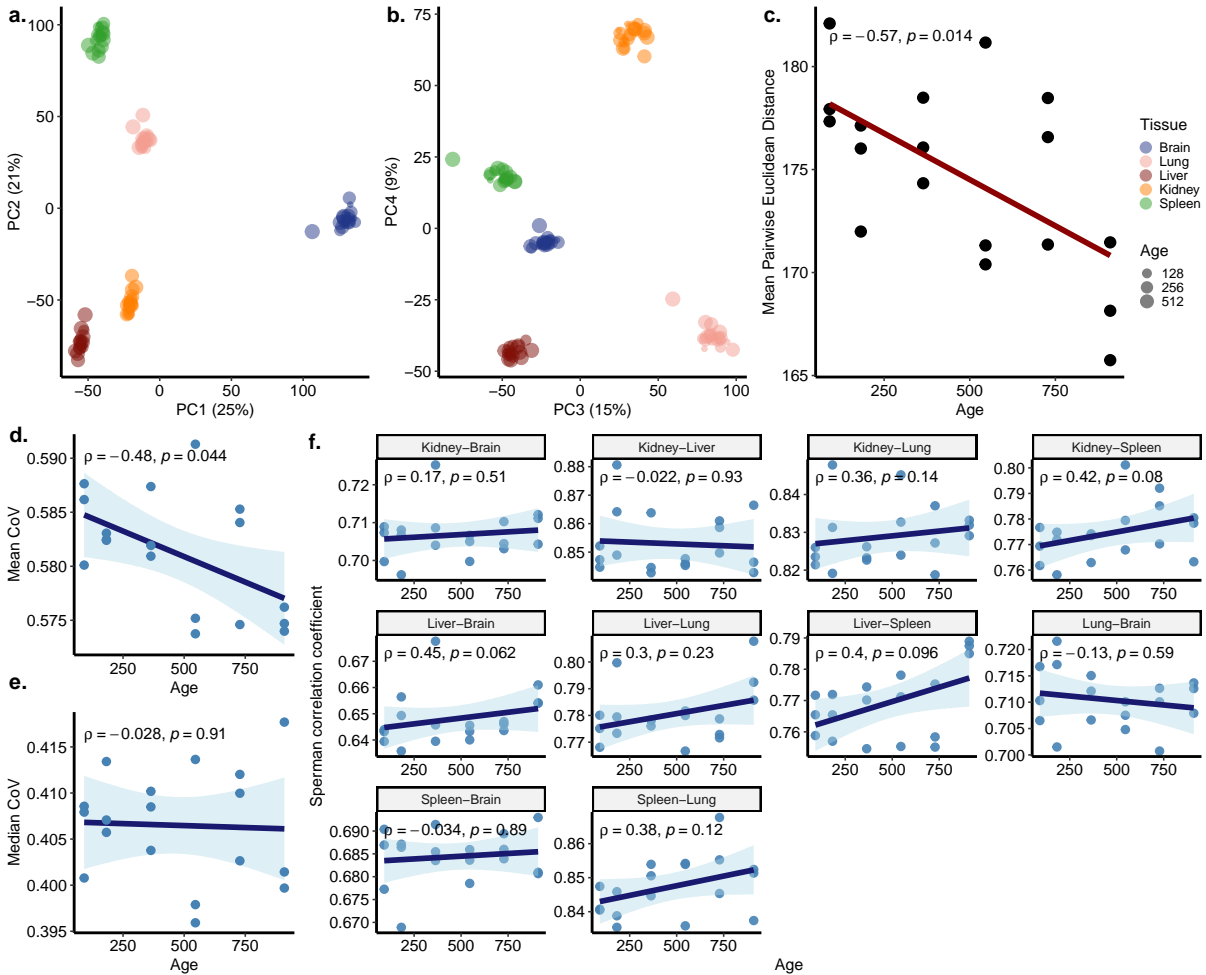

Supplement: supp [file elife-68048-supp-v1.zip › elife_poa_e68048_Figure_2_figure_supplement_7.pdf]

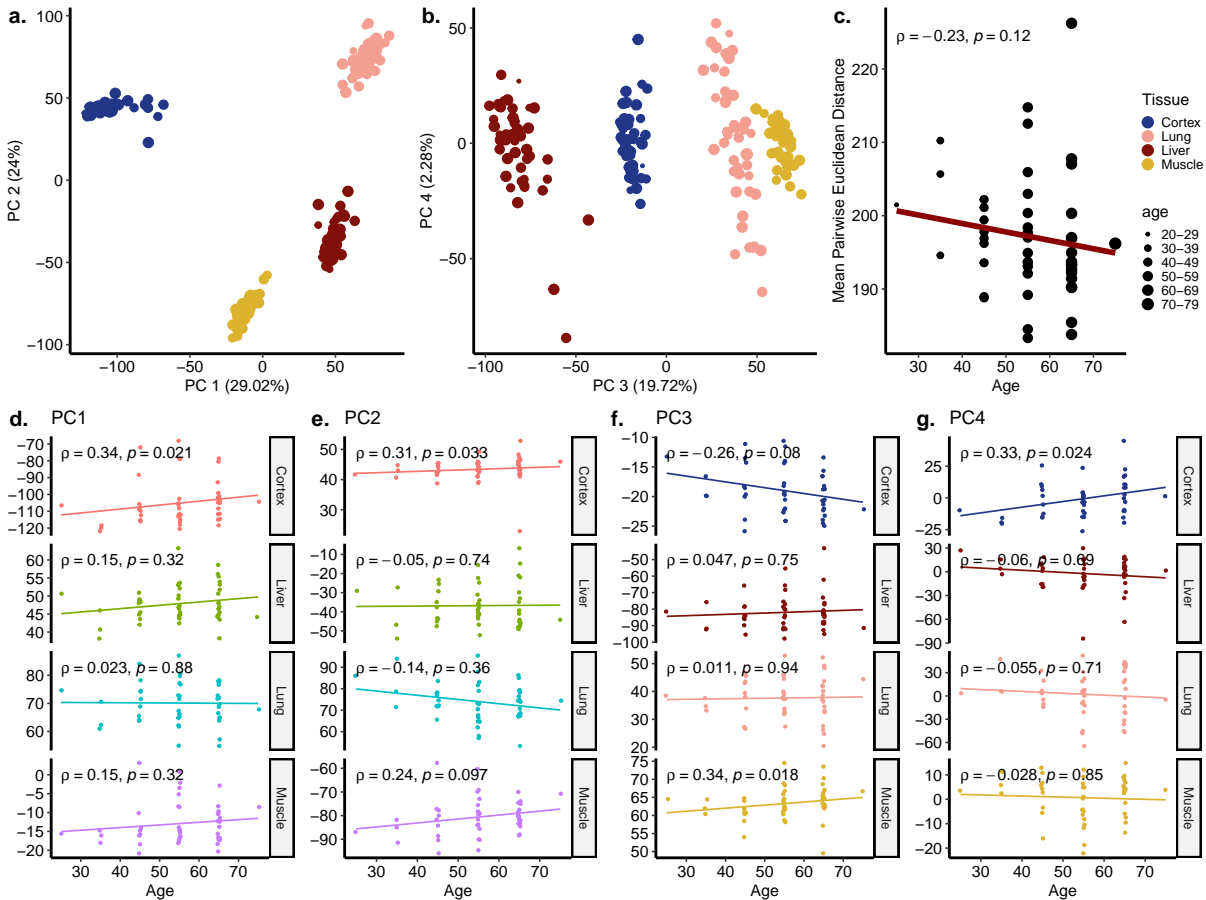

Supplement: supp [file elife-68048-supp-v1.zip › elife_poa_e68048_Figure_2_figure_supplement_8.pdf]

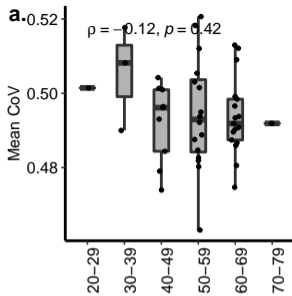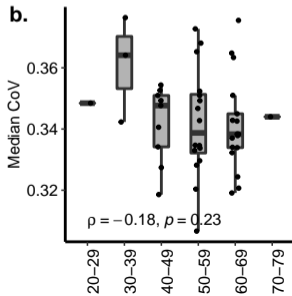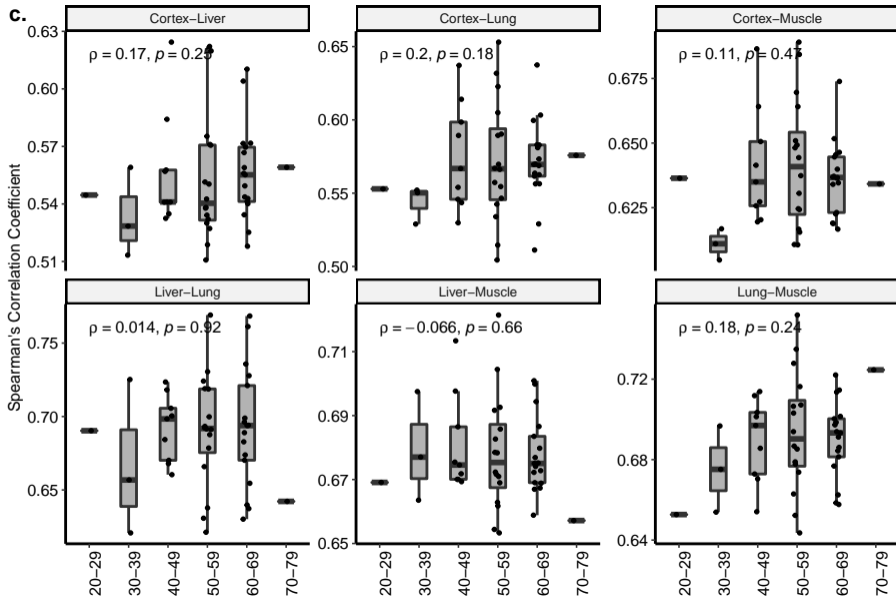

Supplement: supp [file elife-68048-supp-v1.zip › elife_poa_e68048_Figure_2_figure_supplement_9.pdf]

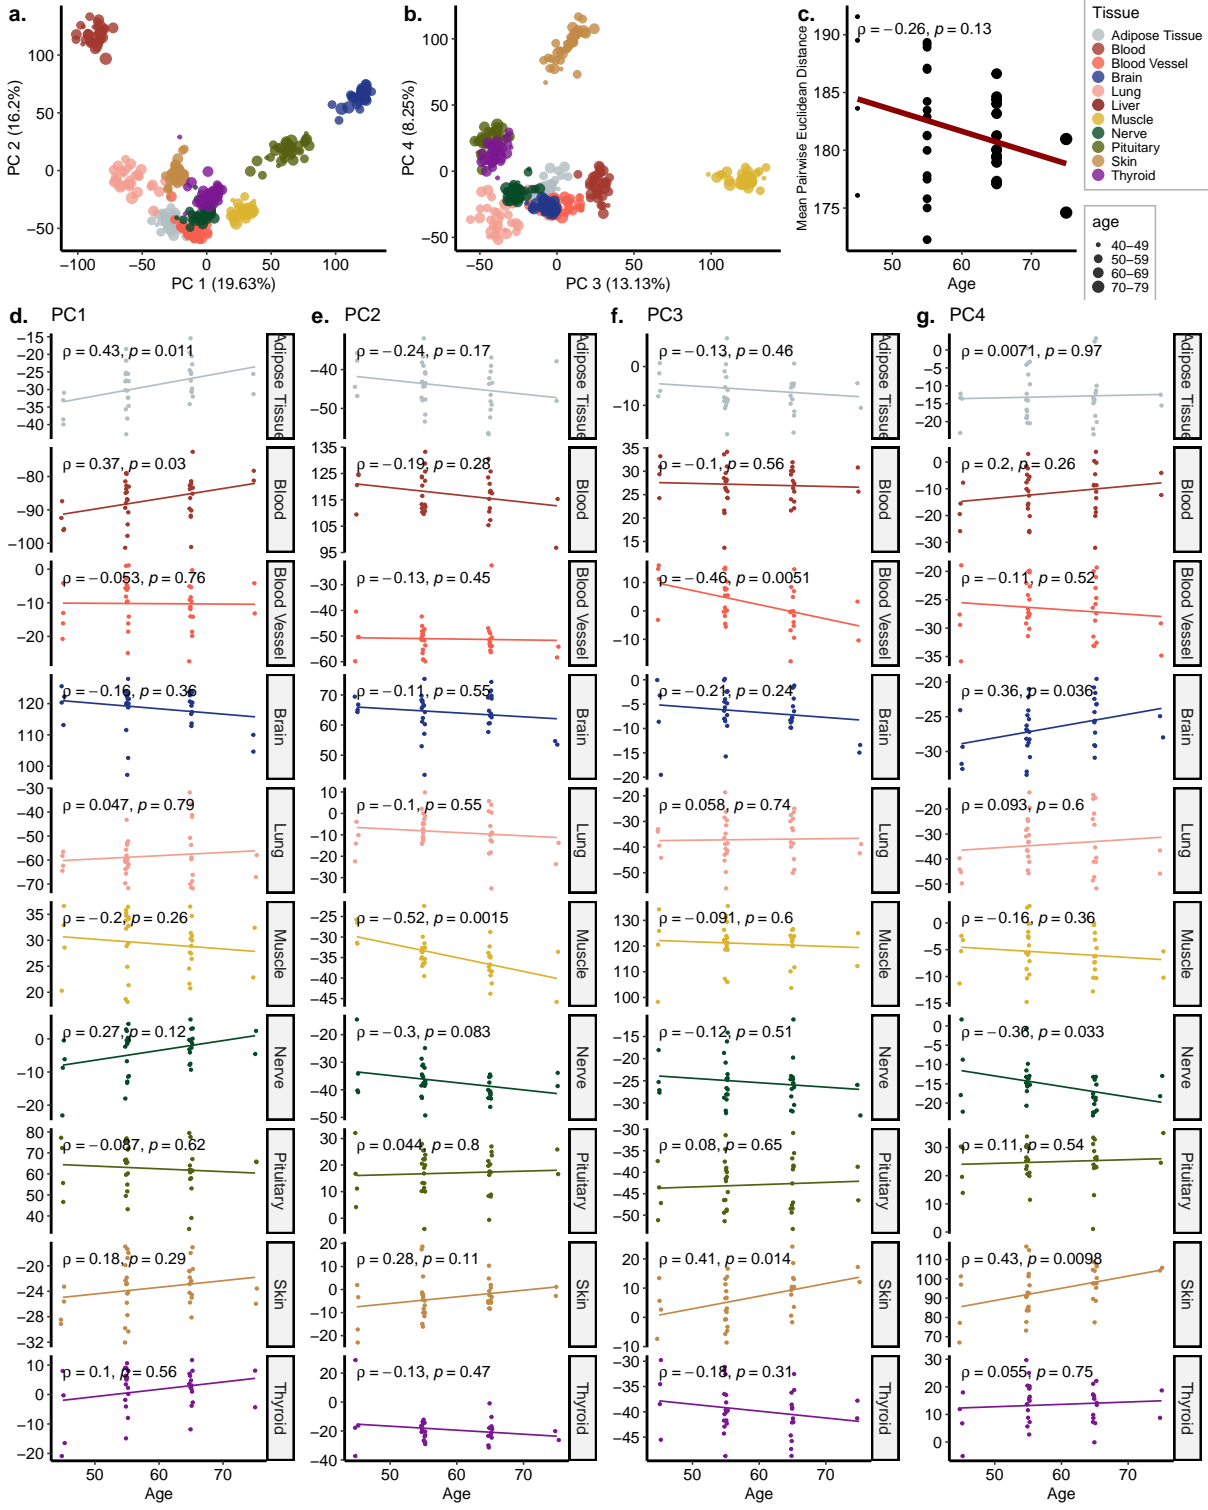

Supplement: supp [file elife-68048-supp-v1.zip › elife_poa_e68048_Figure_2_figure_supplement_10.pdf]

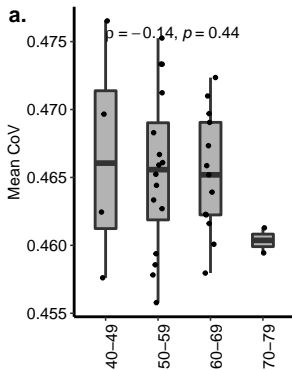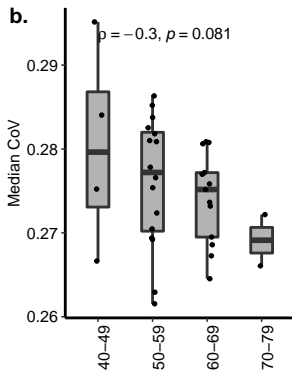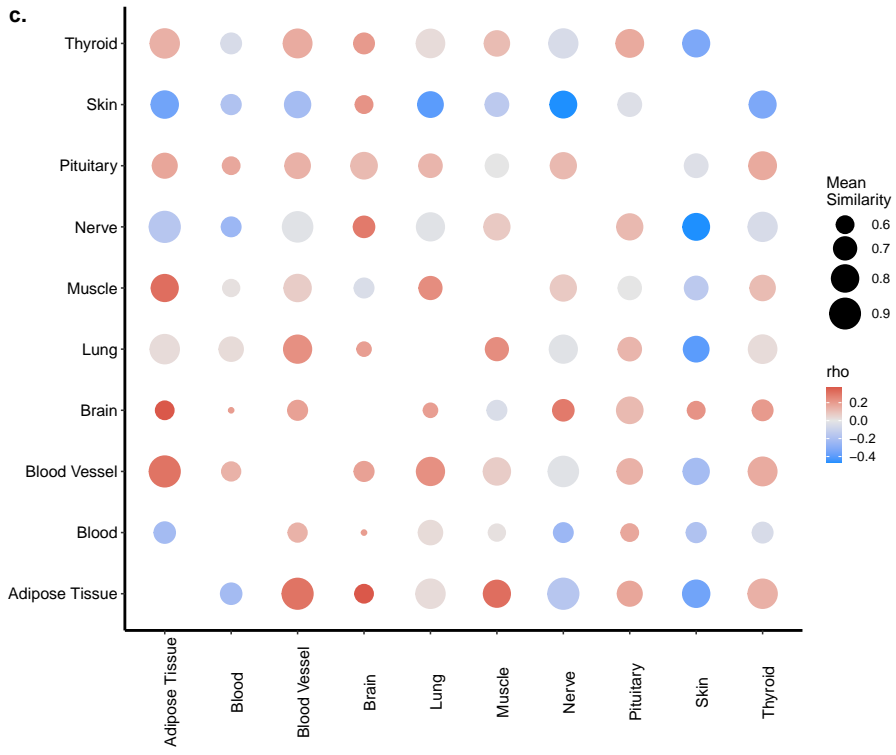

Supplement: supp [file elife-68048-supp-v1.zip › elife_poa_e68048_Figure_2_figure_supplement_11.pdf]

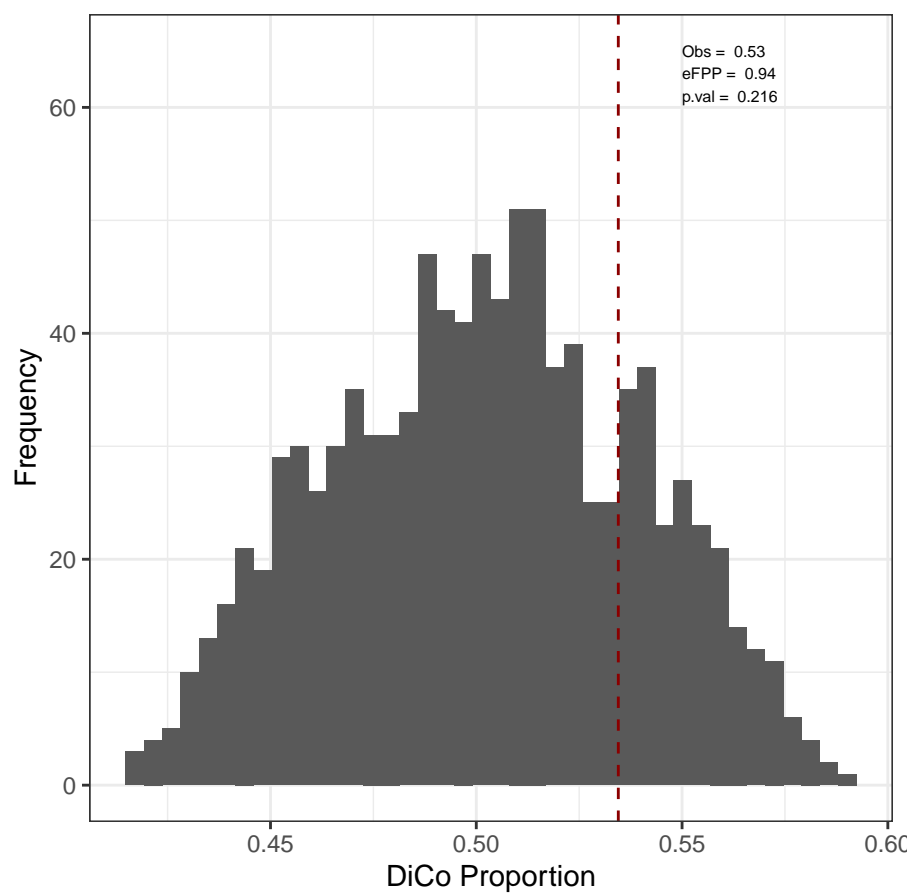

Supplement: supp [file elife-68048-supp-v1.zip › elife_poa_e68048_Figure_2_figure_supplement_12.pdf]

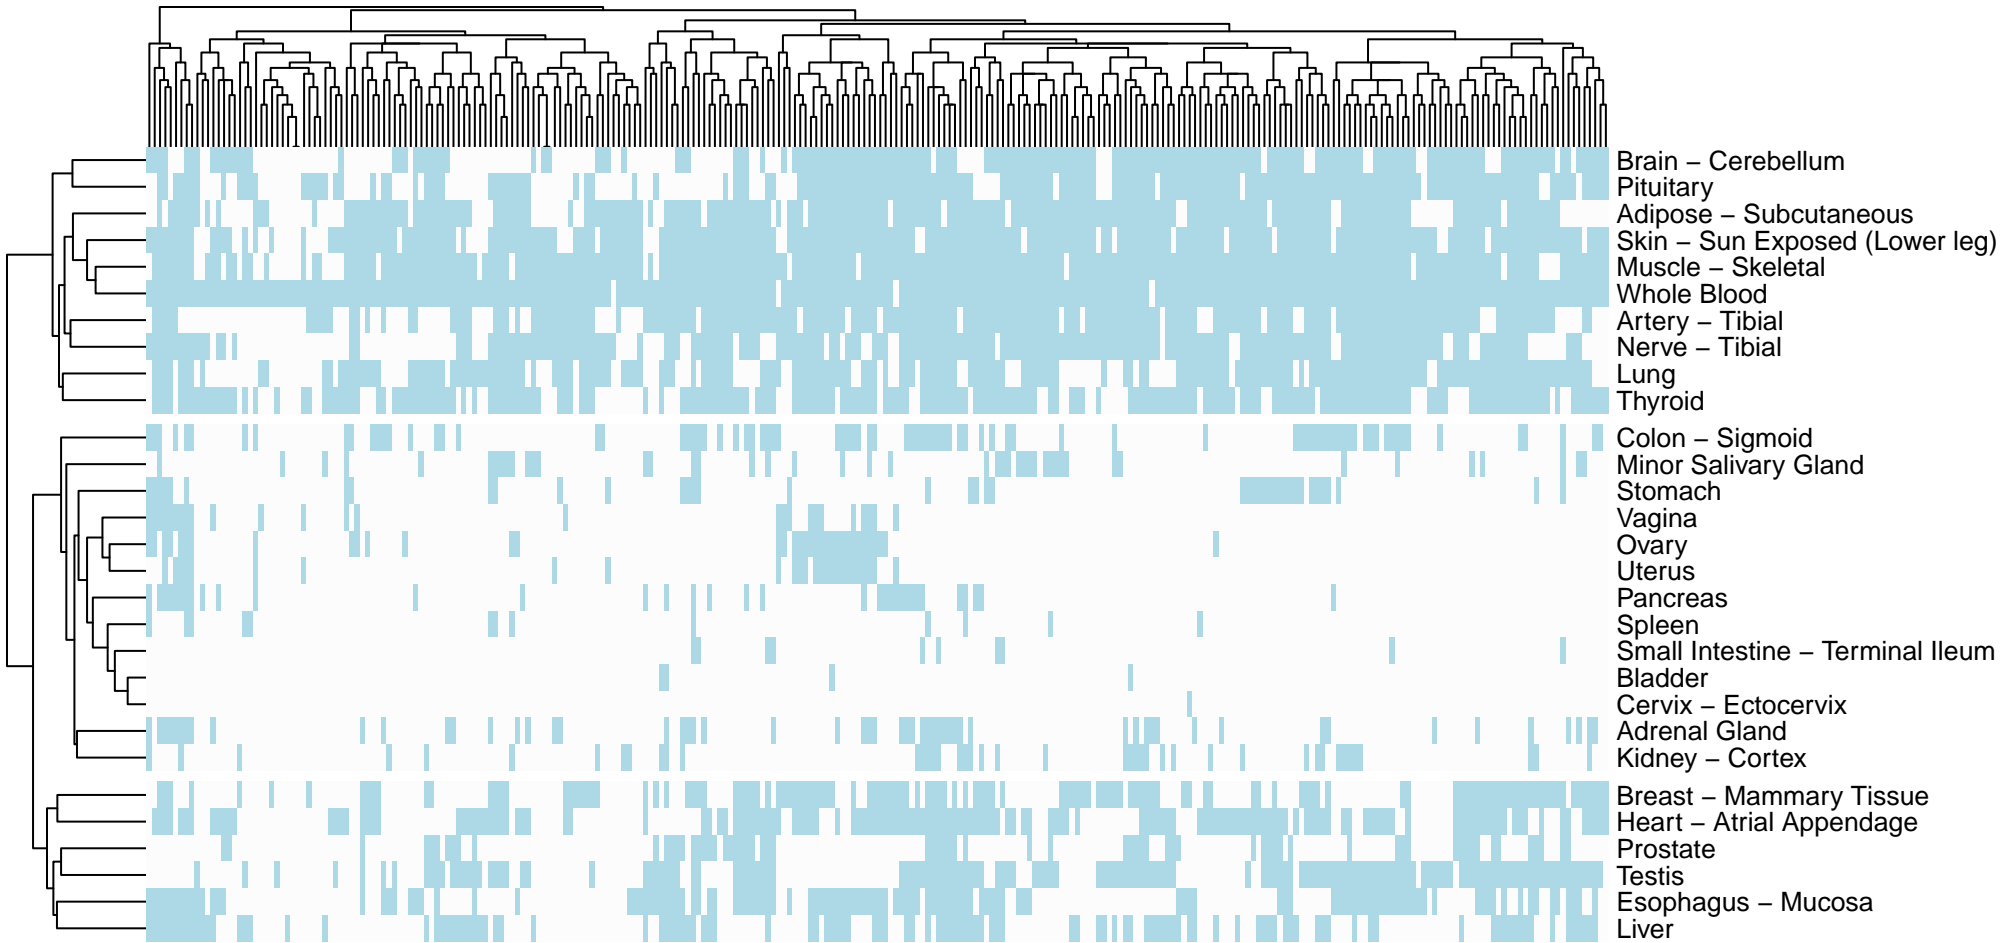

Supplement: supp [file elife-68048-supp-v1.zip › elife_poa_e68048_Figure_2_figure_supplement_13.pdf]

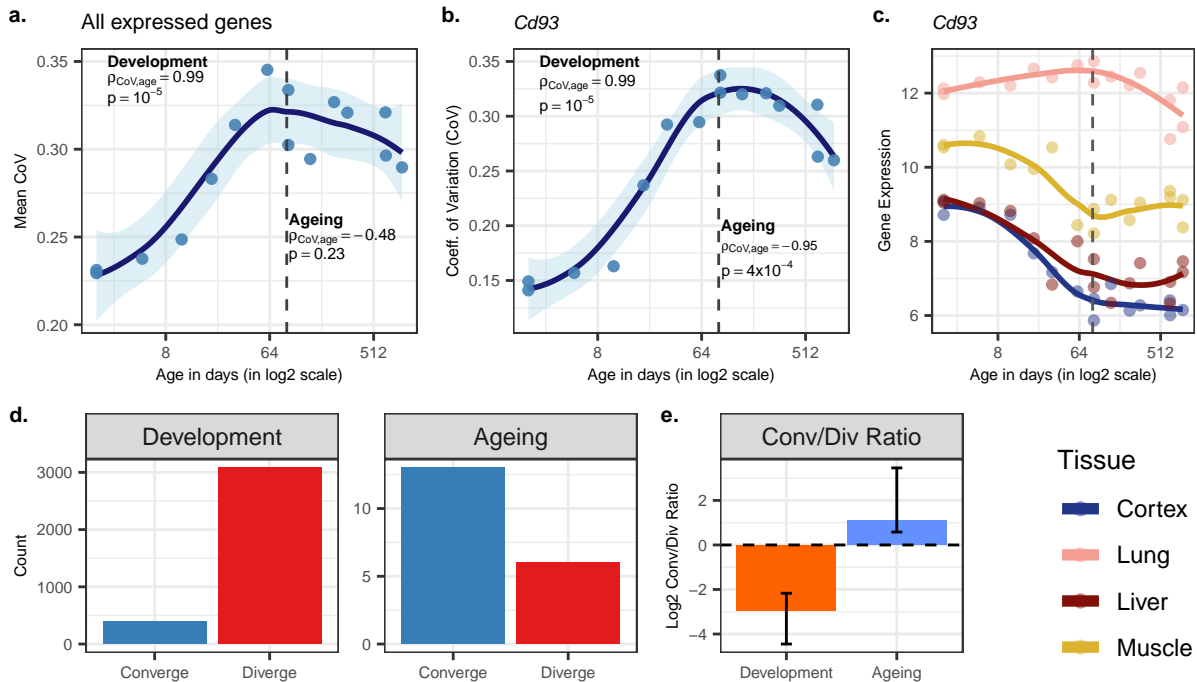

Supplement: supp [file elife-68048-supp-v1.zip › elife_poa_e68048_Figure_2_figure_supplement_14.pdf]

Pattern ■ DiCo ■ DiDi

a.

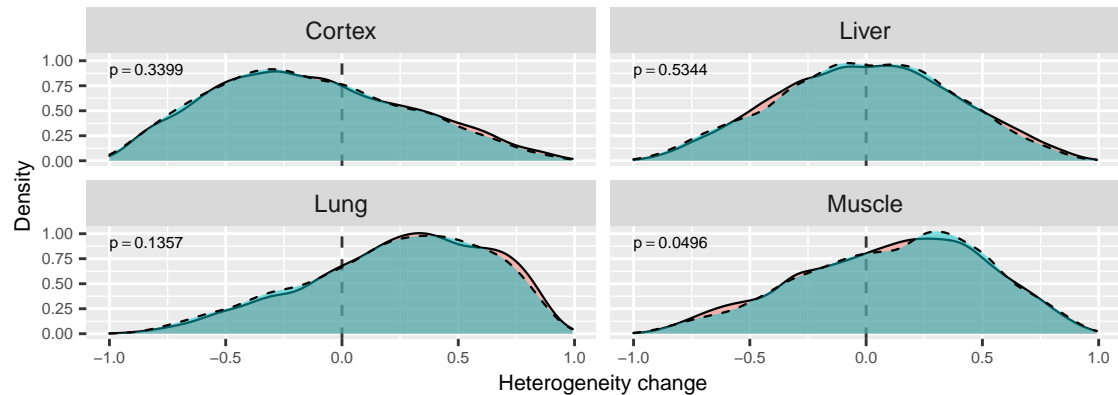

b.

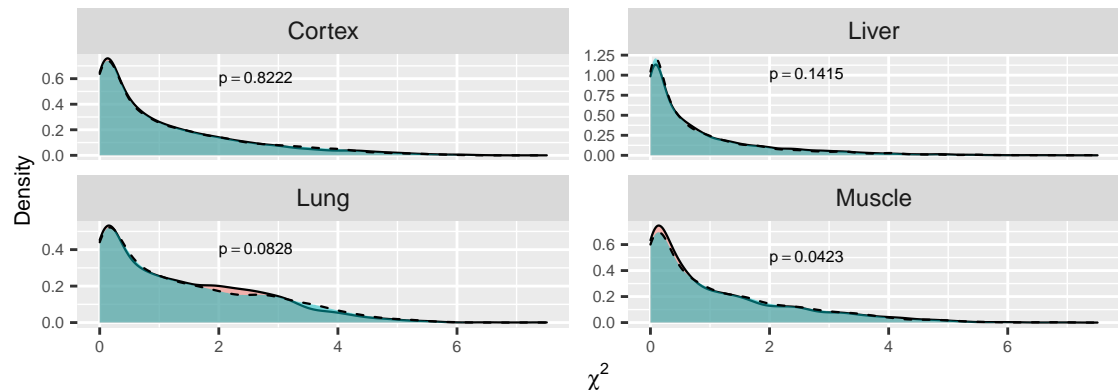

Supplement: supp [file elife-68048-supp-v1.zip › elife_poa_e68048_Figure_2_figure_supplement_15.pdf]

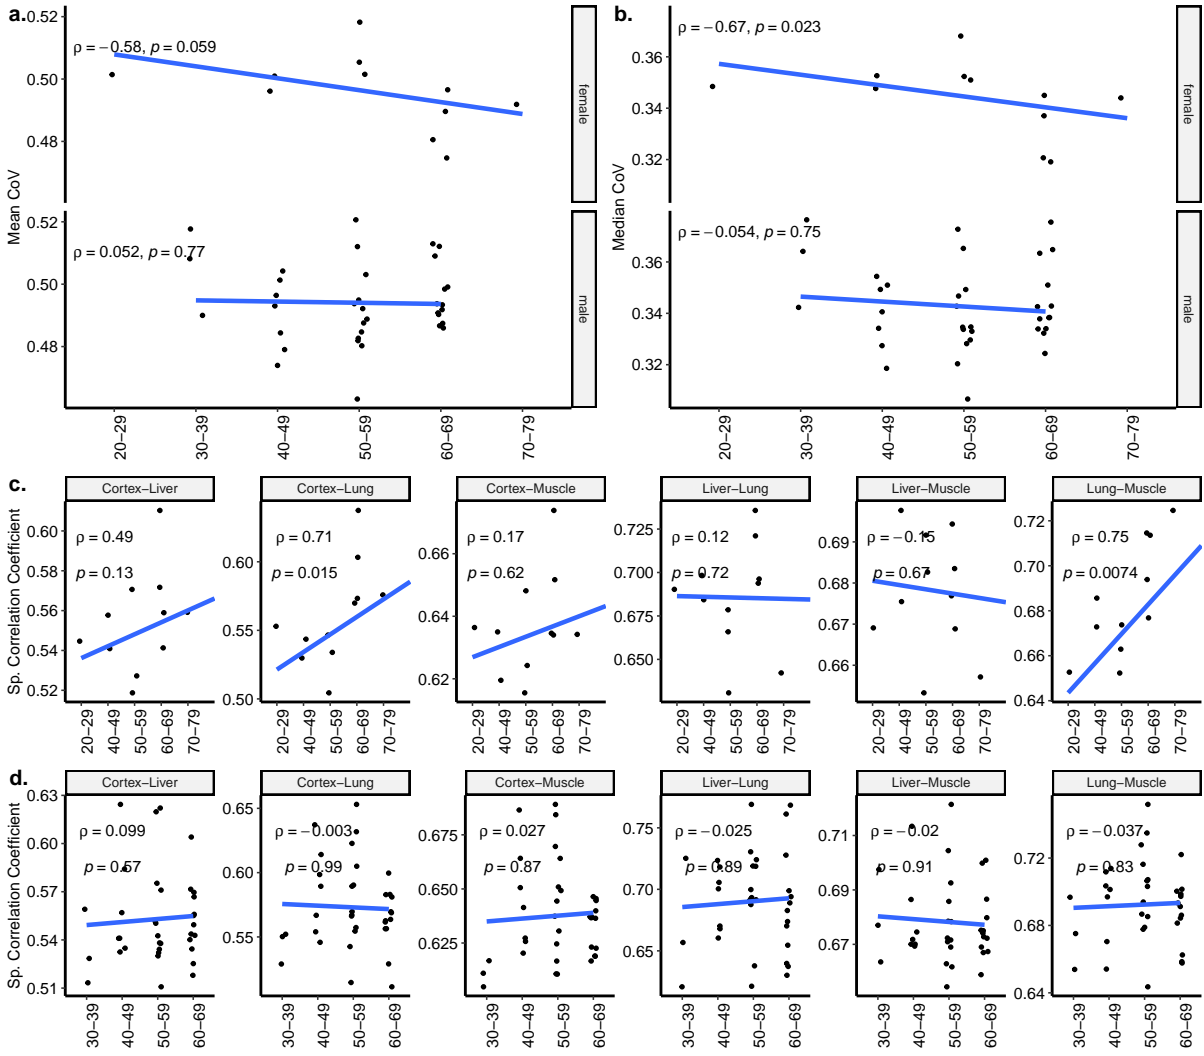

Supplement: supp [file elife-68048-supp-v1.zip › elife_poa_e68048_Figure_2_figure_supplement_16.pdf]

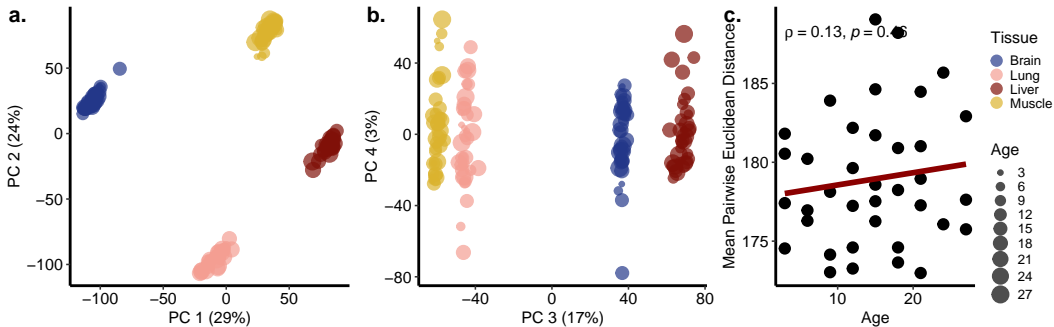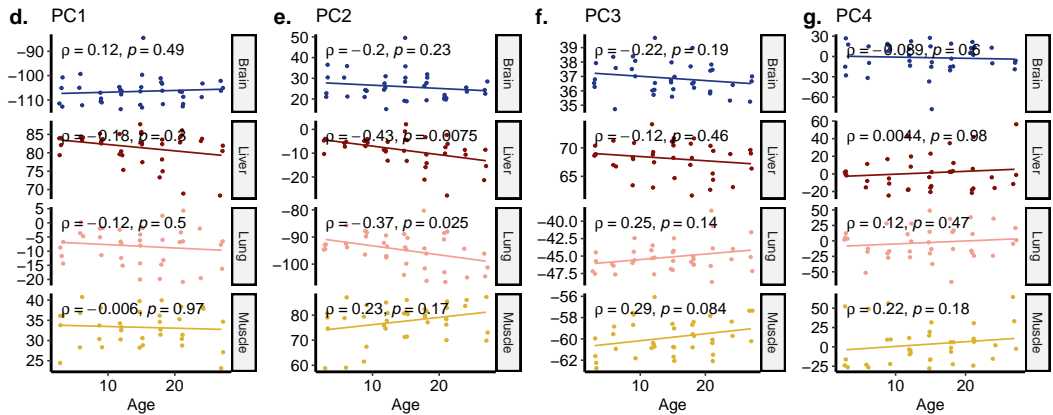

Supplement: supp [file elife-68048-supp-v1.zip › elife_poa_e68048_Figure_2_figure_supplement_17.pdf]

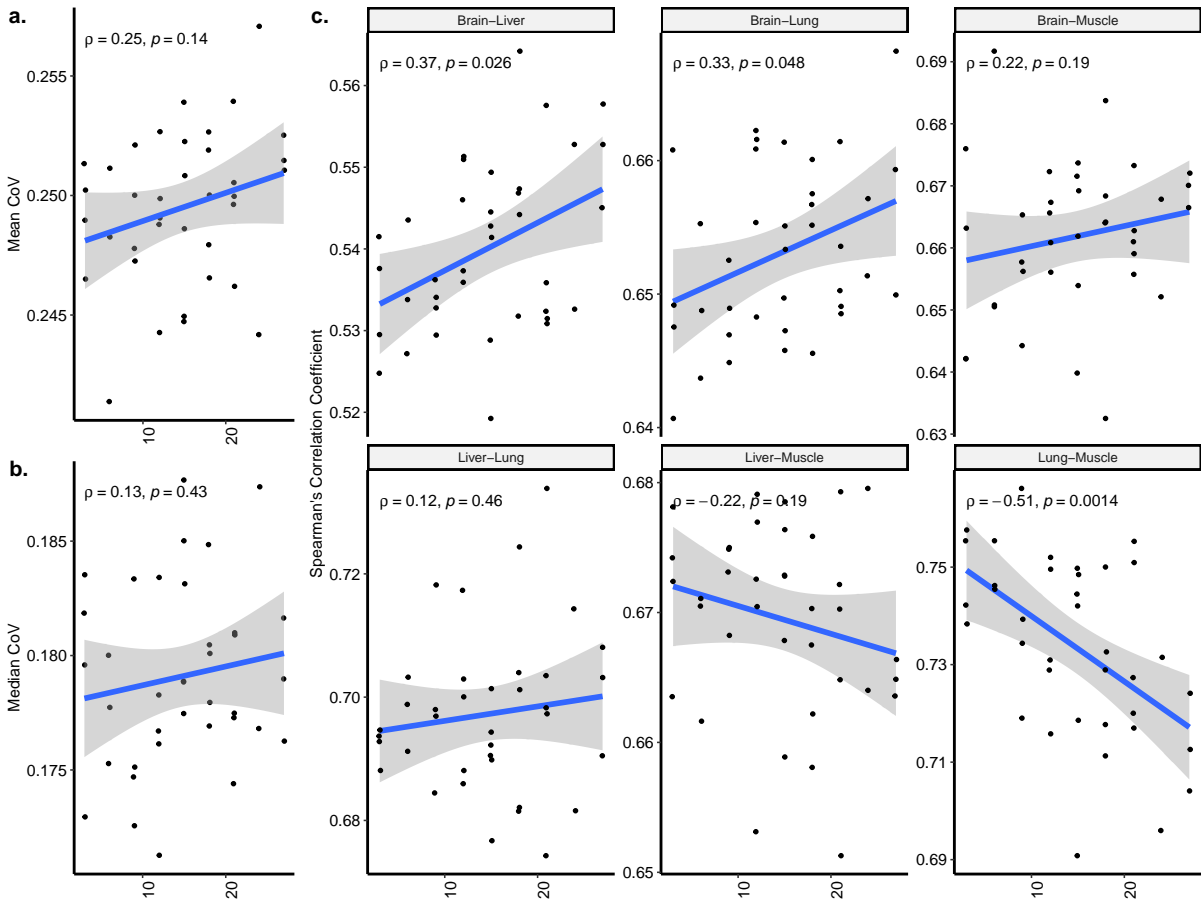

Supplement: supp [file elife-68048-supp-v1.zip › elife_poa_e68048_Figure_2_figure_supplement_18.pdf]

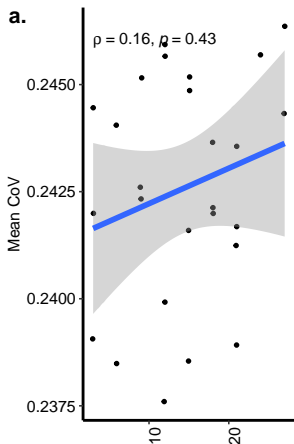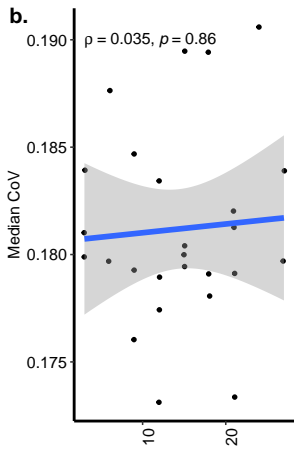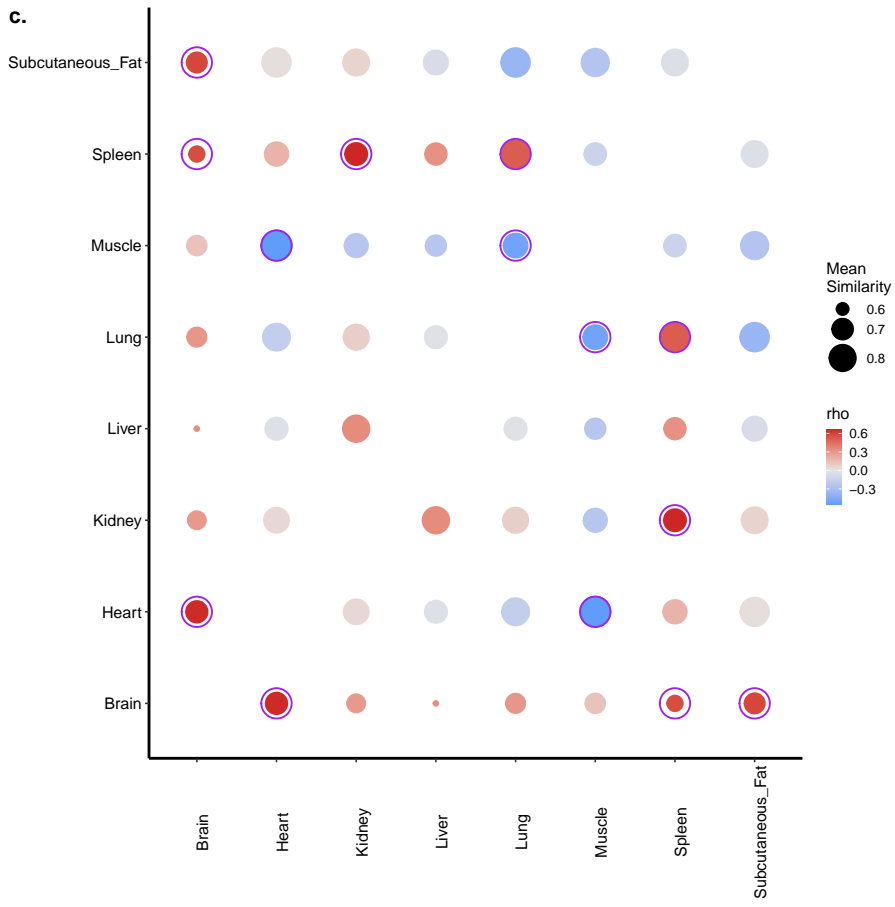

Supplement: supp [file elife-68048-supp-v1.zip › elife_poa_e68048_Figure_2_figure_supplement_20.pdf]

Period ■ Development ■ Ageing

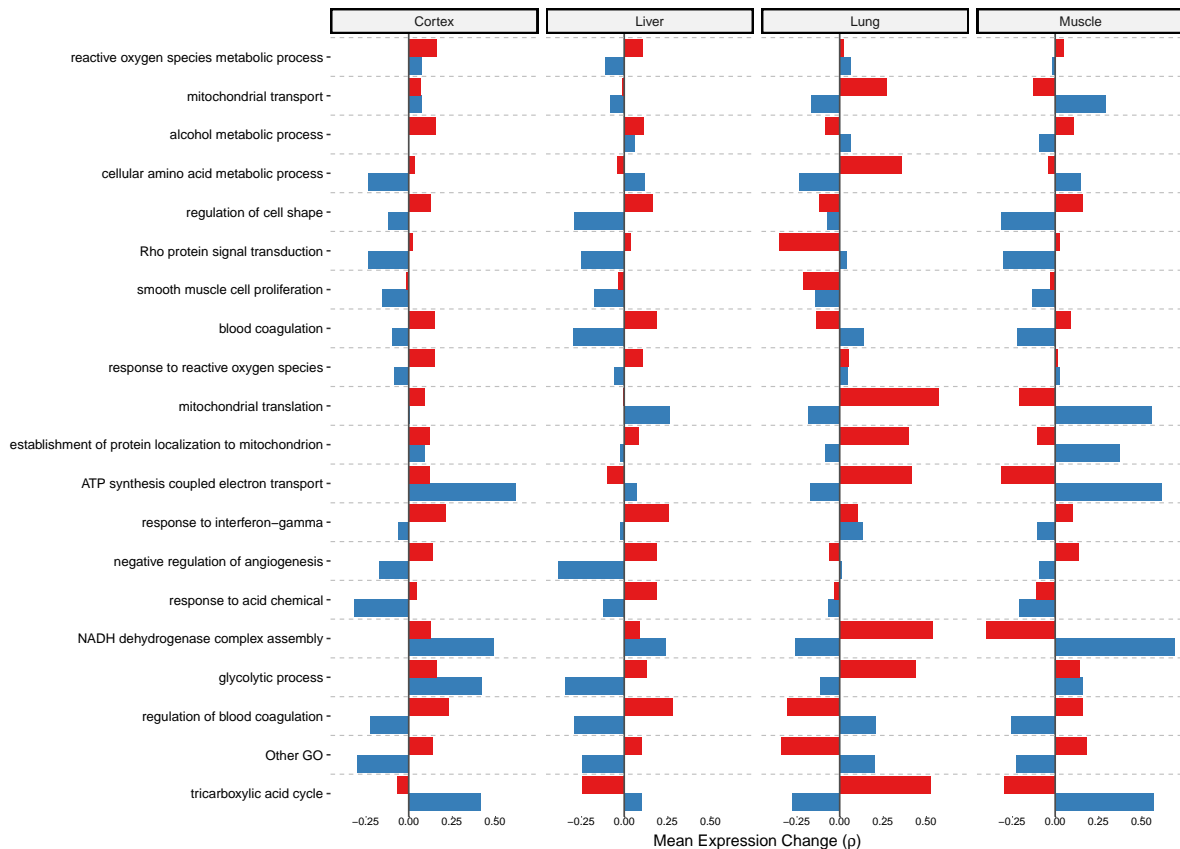

Supplement: supp [file elife-68048-supp-v1.zip › elife_poa_e68048_Figure_4_figure_supplement_1.pdf]

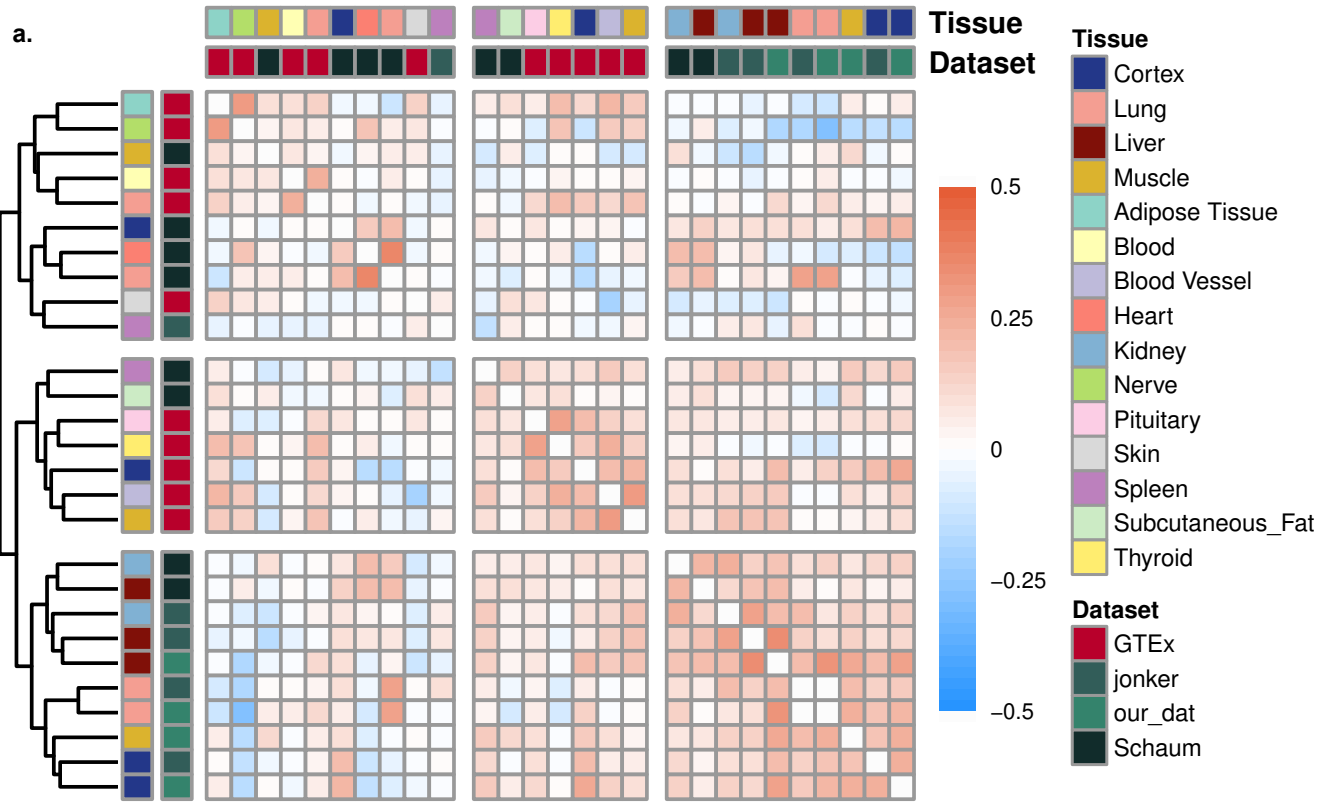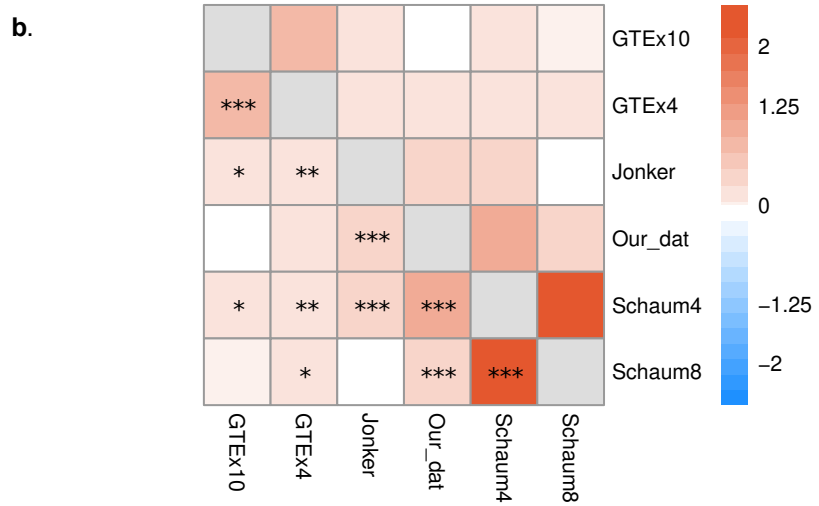

Supplement: supp [file elife-68048-supp-v1.zip › elife_poa_e68048_Figure_4_figure_supplement_2.pdf]

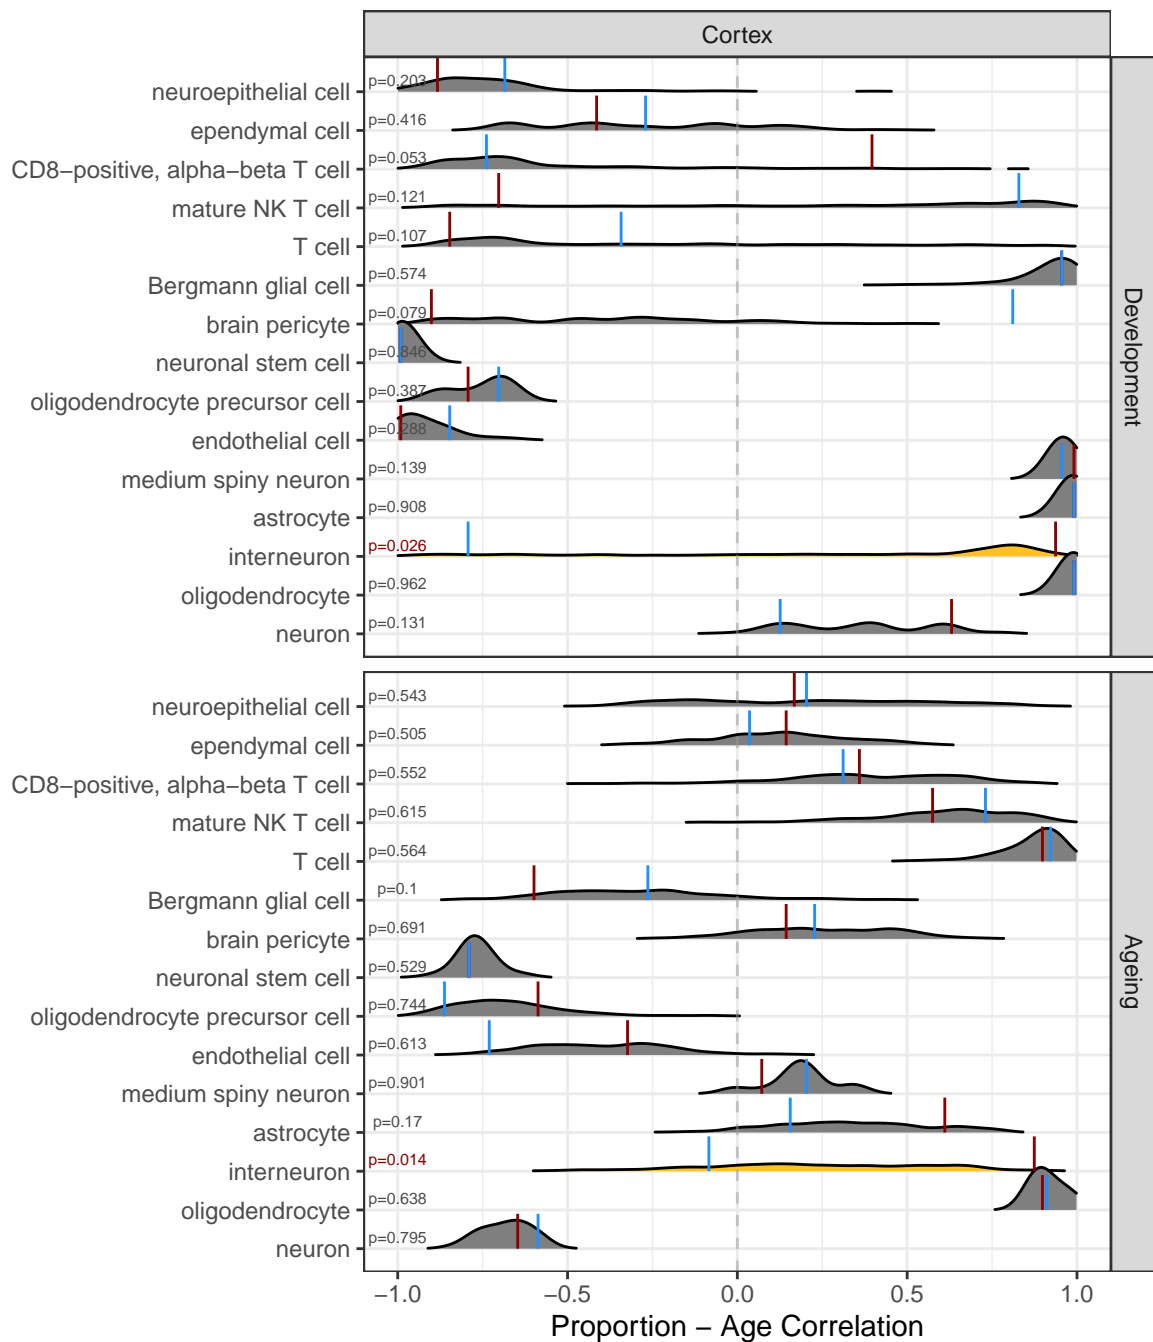

Supplement: supp [file elife-68048-supp-v1.zip › elife_poa_e68048_Figure_5_figure_supplement_2.pdf]

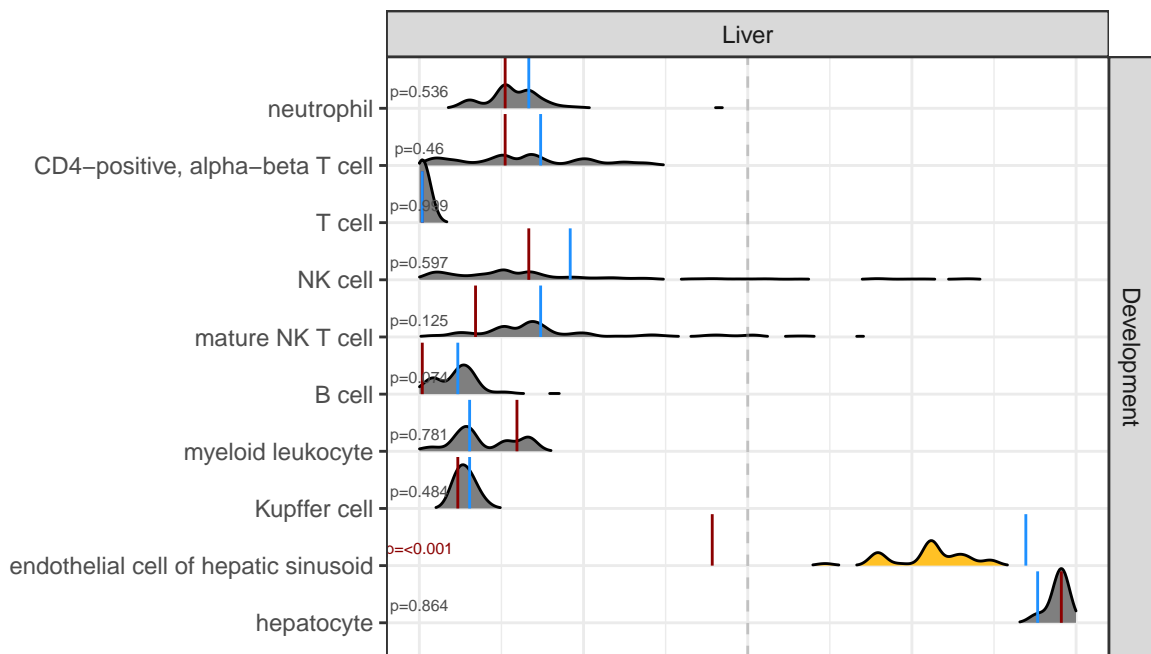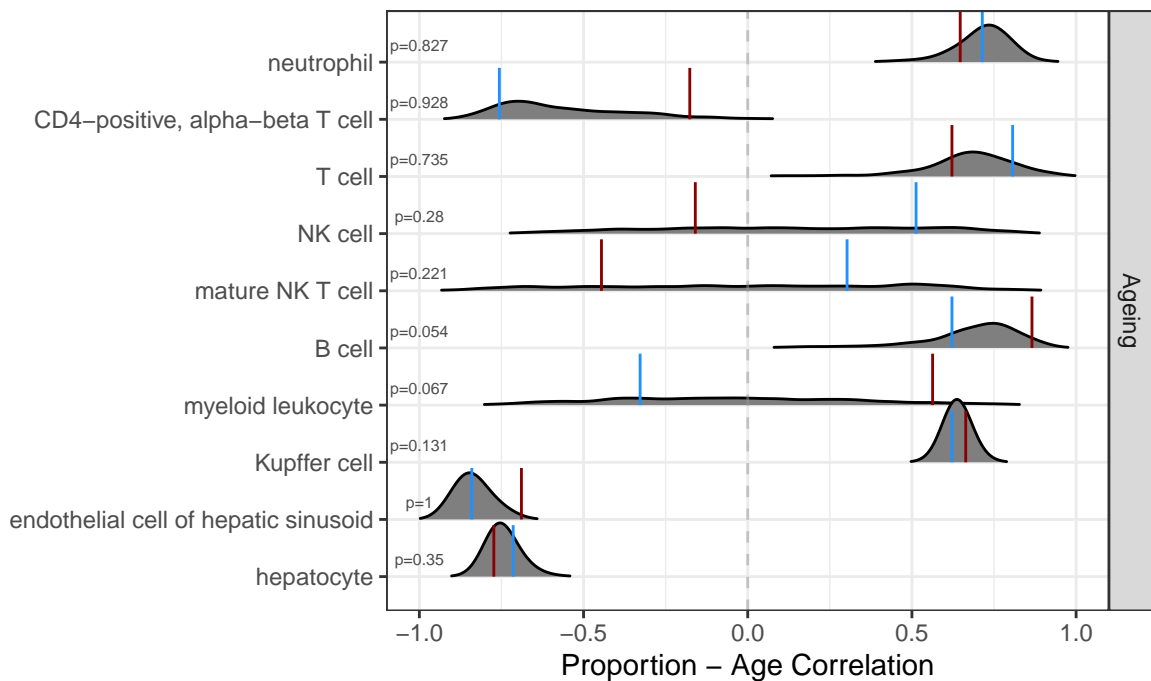

Supplement: supp [file elife-68048-supp-v1.zip › elife_poa_e68048_Figure_5_figure_supplement_3.pdf]

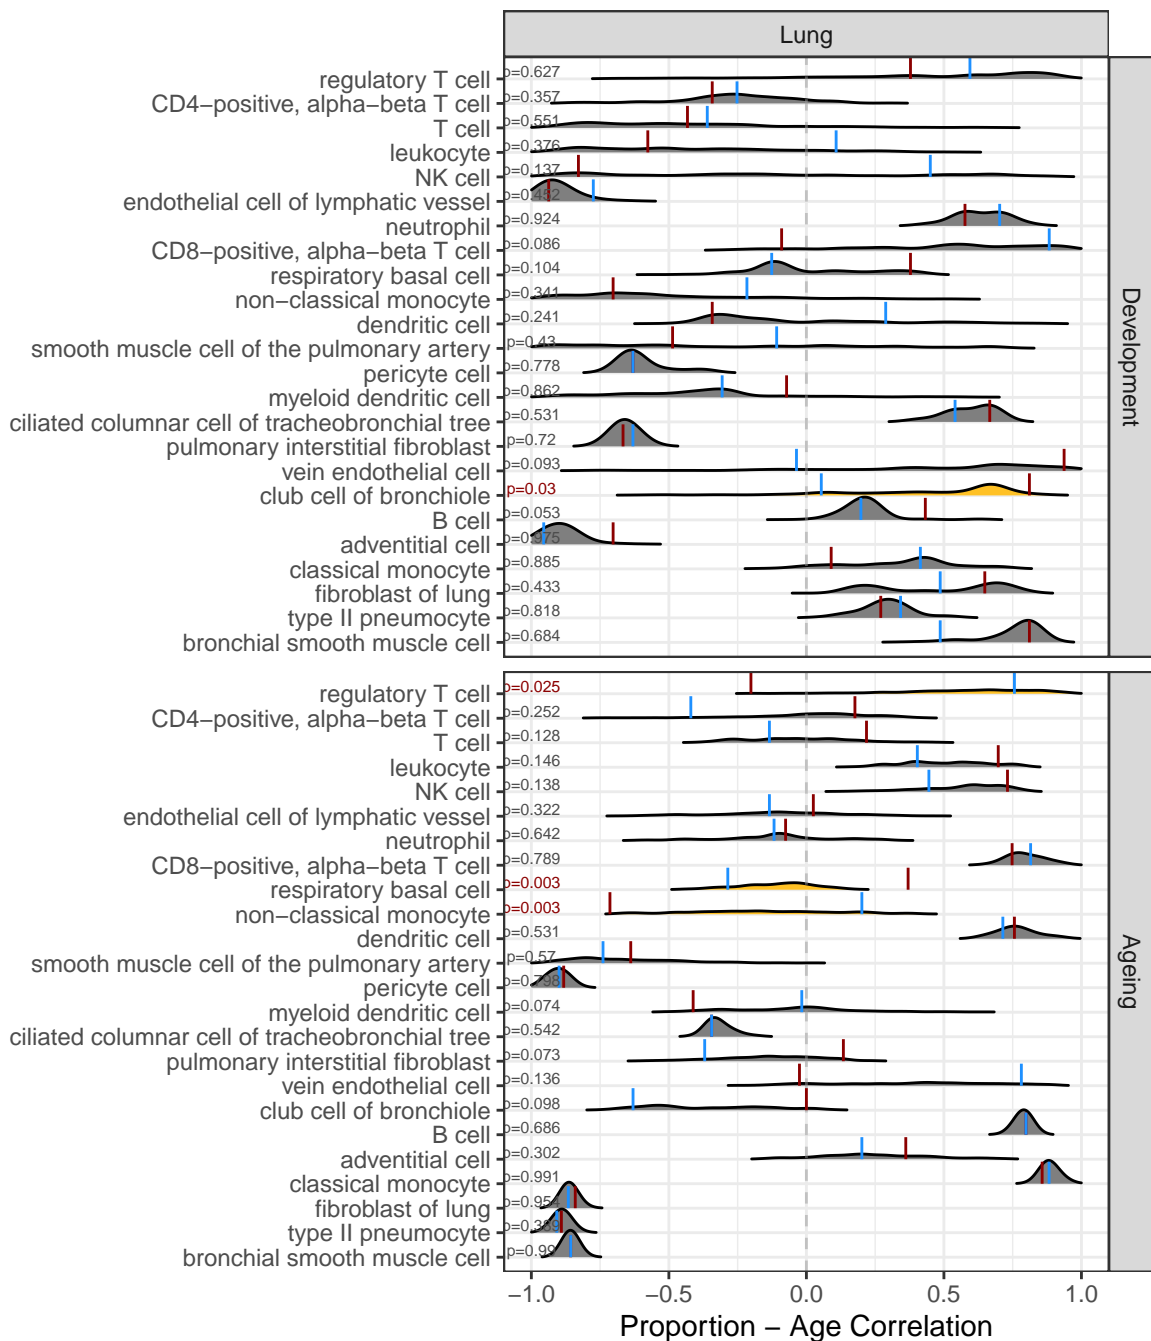

Supplement: supp [file elife-68048-supp-v1.zip › elife_poa_e68048_Figure_5_figure_supplement_4.pdf]

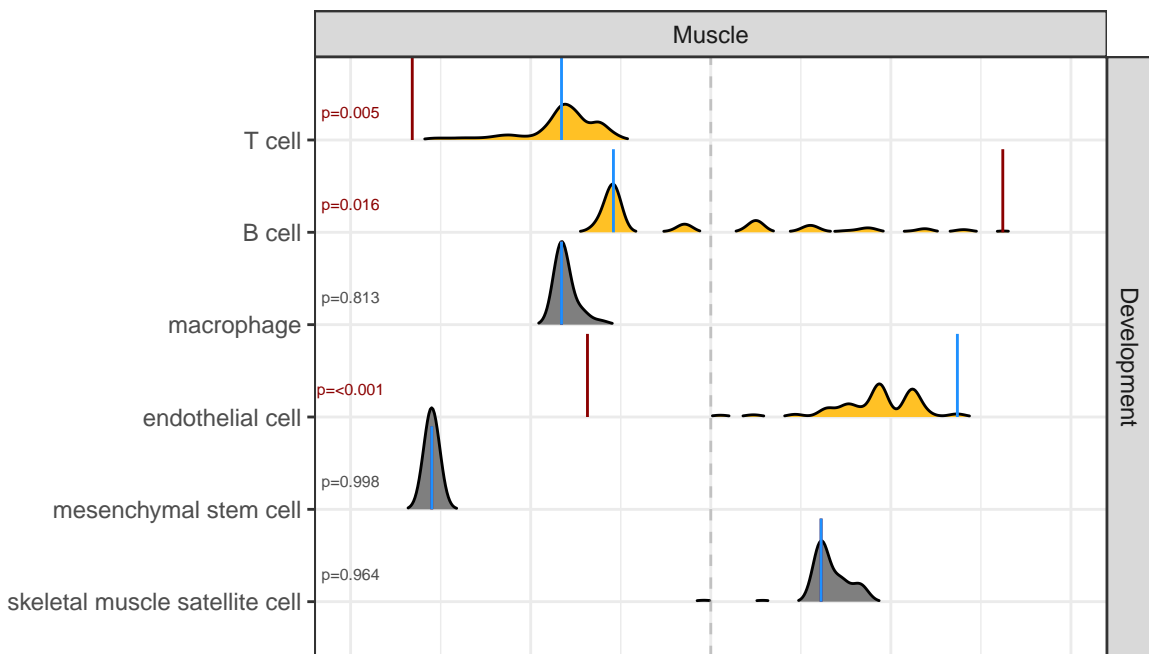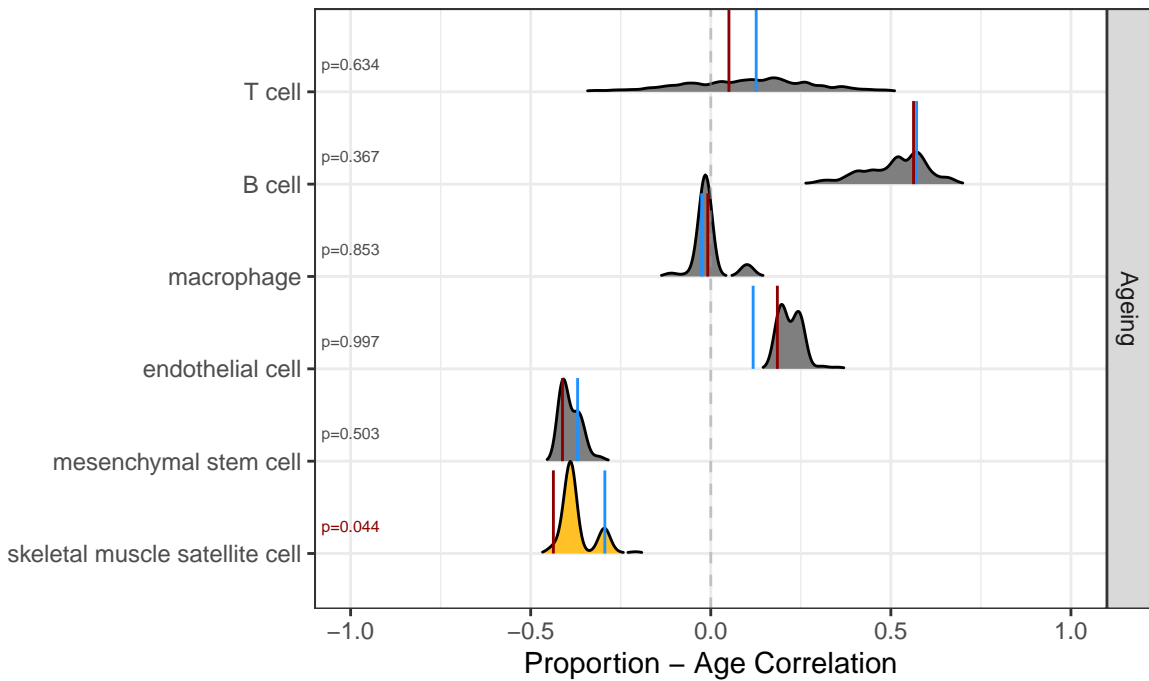

Supplement: supp [file elife-68048-supp-v1.zip › elife_poa_e68048_Figure_5_figure_supplement_5.pdf]

Mean CoV of Genes Among Cell Types

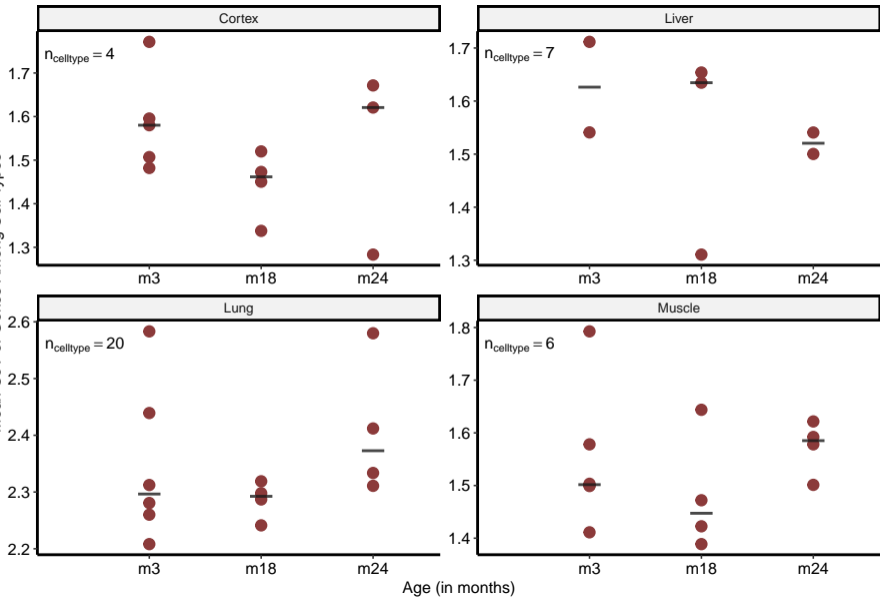

Supplement: supp [file elife-68048-supp-v1.zip › elife_poa_e68048_Figure_5_figure_supplement_6.pdf]

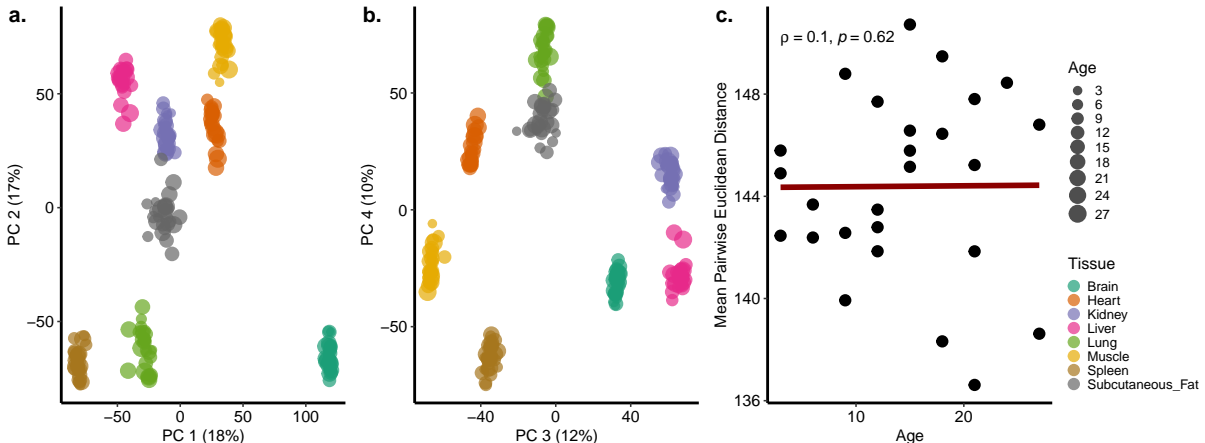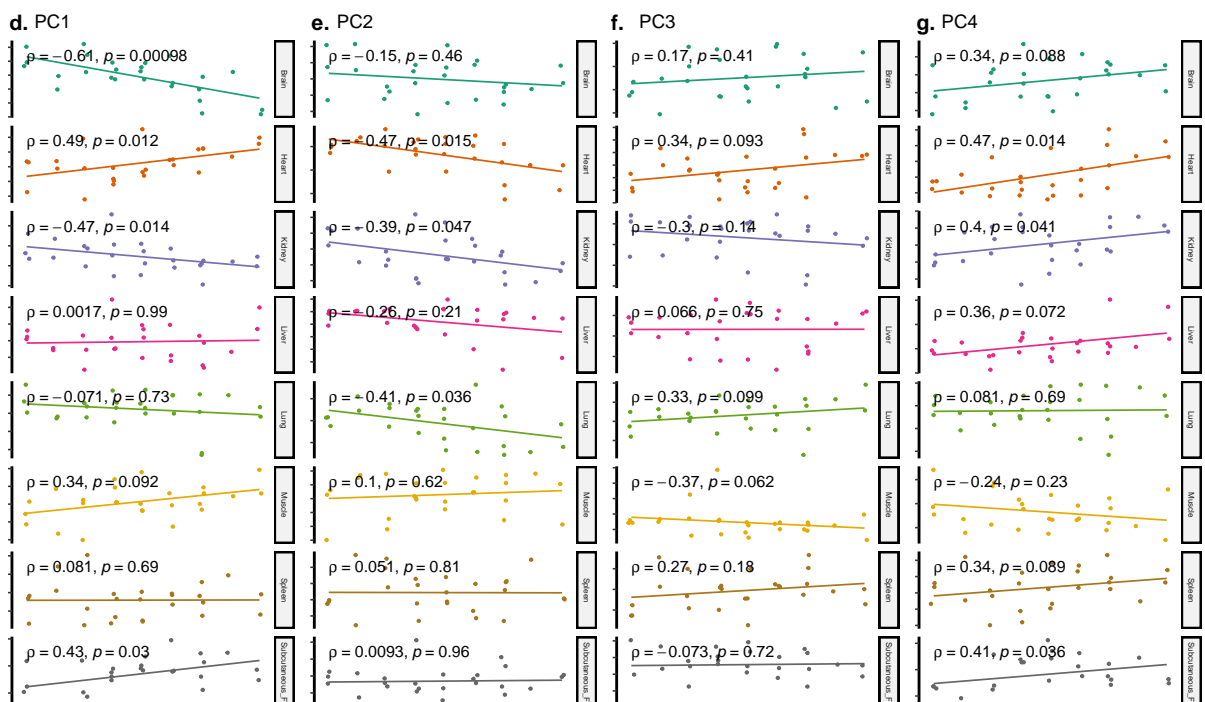

Supplement: supp [file elife_poa_e68048_Figure_2_figure_supplement_19.pdf › elife_poa_e68048_Figure_2_figure_supplement_19.pdf]

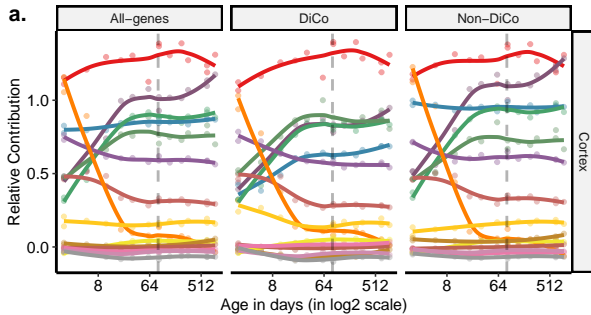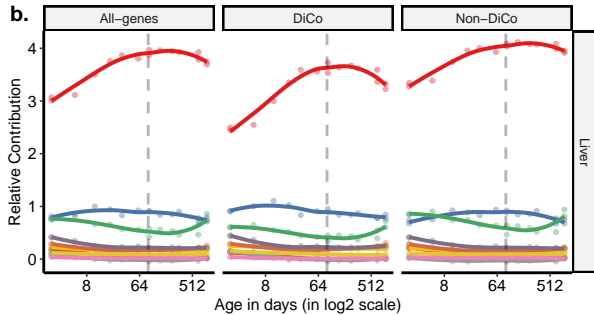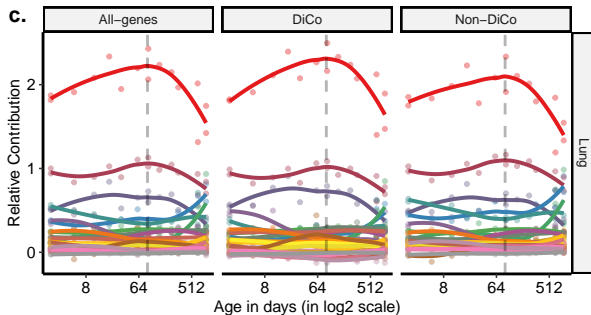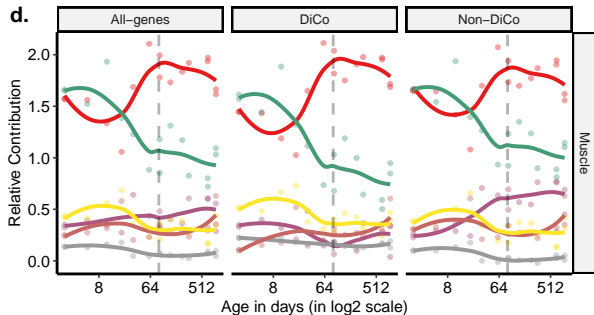

Supplement: supp [file elife_poa_e68048_Figure_5_figure_supplement_1.pdf › elife_poa_e68048_Figure_5_figure_supplement_1.pdf]
